# Supplementary material for: Genomic Variability of SARS-CoV-2 Omicron Variant Circulating in the Russian Federation during Early December 2021 and Late January 2022
Source: Pathogens. 2022 Dec 2;11(12):1461. doi: 10.3390/pathogens11121461 (PMC9786029; doi:10.3390/pathogens11121461)
Supplement: Supplementary file 1 [file pathogens-11-01461-s001.zip]

Archive with 10 entries (10 files):
- Figure S1. Phylogenetic tree built using Maximum-Likelihood method including Russian FMBA and GISAID datasets and global subsampled GISAID dataset. BA.1 cluster .pdf
- Figure S2. Phylogenetic analysis of the Russian SARS-CoV-2 Omicron strains and  closely related viral variants extracted from UShER database to identify clusters.pdf
- Sipplementary figures.pdf
- TableS1.xlsx
- TableS2.xlsx
- TableS3.xlsx
- TableS4.xlsx
- TableS5.xlsx
- TableS6.xlsx
- TableS7.xlsx
