# Supplementary material for: Genomic Variability of SARS-CoV-2 Omicron Variant Circulating in the Russian Federation during Early December 2021 and Late January 2022
Source: Pathogens. 2022 Dec 2;11(12):1461. doi: 10.3390/pathogens11121461 (PMC9786029; doi:10.3390/pathogens11121461)
Supplement: Supplementary file 1 [file pathogens-11-01461-s001.zip › TableS1.xlsx]

## Sheet: Supplementary_table S1
Information about studied SARS-CoV-2 strains
Sample	Lineage	Collection_date	Year	Country	Region	Location	Source
hCoV-19/Wuhan/WH01/2019	B	2019-12-26	2019	China	Hubei	Hubei	wuhan
hCoV-19/Wuhan/Hu-1/2019	B	2019-12-26	2019	China	Hubei	Hubei	wuhan
hCoV-19/Wuhan/HB-WH5-222/2020	B	2020-03-20	2020	China	Hubei	Hubei	wuhan
hCoV-19/Singapore/9648/2021	BA.1.1	2021-12-28	2021	Singapore	Singapore	Singapore	GISAID_world
hCoV-19/Singapore/9637/2021	BA.1	2021-12-28	2021	Singapore	Singapore	Singapore	GISAID_world
hCoV-19/Botswana/R52B46_BHP_AAC32043/2021	BA.1	2021-11-30	2021	Botswana	Southern East	Southern East	GISAID_world
hCoV-19/Mexico/CHP-INMEGEN-47-237/2021	BA.1.15	2021-12-22	2021	Mexico	Chiapas	Chiapas	GISAID_world
hCoV-19/Mexico/TAB-INMEGEN-47-195/2021	BA.1	2021-12-26	2021	Mexico	Tabasco	Tabasco	GISAID_world
hCoV-19/Mexico/TAB-INMEGEN-47-249/2021	BA.1.15	2021-12-24	2021	Mexico	Tabasco	Tabasco	GISAID_world
hCoV-19/Montenegro/589491/2021	BA.1.1	2021-12-20	2021	Montenegro	Podgorica	Podgorica	GISAID_world
hCoV-19/Canada/MB-NML-260515/2021	BA.1.14	2021-11-30	2021	Canada	Manitoba	Manitoba	GISAID_world
hCoV-19/SouthAfrica/CERI-KRISP-K032700/2021	BA.1	2021-11-30	2021	South Africa	KwaZulu-Natal	KwaZulu-Natal	GISAID_world
hCoV-19/Ghana/TRA-2291/2021	BA.1	2021-11-24	2021	Ghana	Greater Accra	Greater Accra	GISAID_world
hCoV-19/Botswana/R43B68_BHP_121142361/2021	BA.1	2021-11-23	2021	Botswana	Southern East	Southern East	GISAID_world
hCoV-19/Australia/QLD5035/2021	BA.1.17	2021-12-25	2021	Australia	Queensland	Queensland	GISAID_world
hCoV-19/USA/NV-NSPHL-488210/2021	BA.1.1	2021-12-22	2021	USA	Nevada	Nevada	GISAID_world
hCoV-19/Nigeria/NCDC-NR1525/2021	BA.1.1	2021-12-10	2021	Nigeria	Abuja	Abuja	GISAID_world
hCoV-19/SouthAfrica/NICD-N23575/2021	BA.1	2021-11-29	2021	South Africa	Limpopo	Limpopo	GISAID_world
hCoV-19/Malawi/MLW-00275/2021	BA.1	2021-12-16	2021	Malawi	Southern Region MW	Southern Region MW	GISAID_world
hCoV-19/Mexico/VER-INMEGEN-45-130/2021	BA.1.15	2021-12-18	2021	Mexico	Veracruz	Veracruz	GISAID_world
hCoV-19/Pakistan/NIH-B32-S1/2021	BA.1	2021-12-25	2021	Pakistan	Islamabad Capital Territory	Islamabad Capital Territory	GISAID_world
hCoV-19/Chile/VS-194985/2021	BA.1.1	2021-12-17	2021	Chile	Valparaiso	Valparaiso	GISAID_world
hCoV-19/Mozambique/CERI-KRISP-K032754/2021	BA.1	2021-11-26	2021	Mozambique	Maputo	Maputo	GISAID_world
hCoV-19/Mozambique/CERI-KRISP-K032765/2021	BA.1	2021-11-30	2021	Mozambique	Maputo	Maputo	GISAID_world
hCoV-19/Oman/52124429/2021	BA.1	2021-12-11	2021	Oman	Muscat	Muscat	GISAID_world
hCoV-19/NewZealand/21CH0996/2021	BA.1	2021-12-19	2021	New Zealand	Canterbury	Canterbury	GISAID_world
hCoV-19/Zambia/ZMB-128376/2021	BA.1.17	2021-11-30	2021	Zambia	Lusaka	Lusaka	GISAID_world
hCoV-19/Zambia/ZMB-128404/2021	BA.1	2021-11-30	2021	Zambia	Lusaka	Lusaka	GISAID_world
hCoV-19/Zambia/ZMB-128421/2021	BA.1	2021-11-30	2021	Zambia	Lusaka	Lusaka	GISAID_world
hCoV-19/Panama/SEQ773/2021	BA.1.17	2021-12-13	2021	South Africa	South Africa	South Africa	GISAID_world
hCoV-19/Spain/CT-HUGTiPM062KF8G2/2021	BA.1.17	2021-12-15	2021	Spain	Catalunya	Catalunya	GISAID_world
hCoV-19/Belgium/AZDelta-2150-06535/2021	BA.1	2021-12-16	2021	Belgium	Oudenaarde	Oudenaarde	GISAID_world
hCoV-19/Belgium/ULG-23129/2021	BA.1.1	2021-12-19	2021	Belgium	LiГЁge	LiГЁge	GISAID_world
hCoV-19/India/TG-GMCH-ICMR-INSACOG-C309181/2021	BA.1.15	2021-12-30	2021	India	Telangana	Telangana	GISAID_world
hCoV-19/Ecuador/USFQ-2479/2021	BA.1.1	2021-12-23	2021	Ecuador	Pichincha	Pichincha	GISAID_world
hCoV-19/Malta/MDxMDHO33/2021	BA.1	2021-12-20	2021	Malta	Malta	Malta	GISAID_world
hCoV-19/Jordan/Biolab0424/2021	BA.1.17	2021-12-17	2021	Jordan	Amman	Amman	GISAID_world
hCoV-19/Canada/un-UB-KSL-04393/2021	BA.1.1.10	2021-12-10	2021	Canada	Canada	Canada	GISAID_world
hCoV-19/Curacao/CW-RIVM-78546/2021	BA.1.1	2021-12-19	2021	Curacao	Curacao	Curacao	GISAID_world
hCoV-19/Curacao/CW-RIVM-78540/2021	BA.1.1	2021-12-16	2021	Curacao	Curacao	Curacao	GISAID_world
hCoV-19/Japan/IC-2460/2021	BA.1	2021-12-17	2021	Germany	Germany	Germany	GISAID_world
hCoV-19/HongKong/HK-HKPU-12404/2021	BA.1	2021-11-20	2021	Hong Kong	Hong Kong	Hong Kong	GISAID_world
hCoV-19/SouthAfrica/NICD-R17617/2021	BA.1	2021-12-03	2021	South Africa	Gauteng	Gauteng	GISAID_world
hCoV-19/USA/IL-CDC-ASC210633705/2021	BA.1	2021-12-17	2021	USA	Illinois	Illinois	GISAID_world
hCoV-19/USA/SD-CDC-ASC210629121/2021	BA.1	2021-12-17	2021	USA	South Dakota	South Dakota	GISAID_world
hCoV-19/USA/DE-CDC-LC0445581/2021	BA.1	2021-12-23	2021	USA	Delaware	Delaware	GISAID_world
hCoV-19/USA/GA-GPHL-2682/2021	BA.1.1	2021-12-22	2021	USA	Georgia	Georgia	GISAID_world
hCoV-19/Algeria/95495-46/2021	BA.1	2021-12-10	2021	Algeria	Algiers	Algiers	GISAID_world
hCoV-19/Zhejiang/4081/2021	BA.1.15	2021-12-29	2021	Nigeria	Nigeria	Nigeria	GISAID_world
hCoV-19/Australia/QLD2791/2021	BA.1.17	2021-12-17	2021	Australia	Queensland	Queensland	GISAID_world
hCoV-19/Spain/MD-HGUGM-5832776/2021	BA.1	2021-12-07	2021	Spain	Madrid	Madrid	GISAID_world
hCoV-19/Australia/NSW-ICPMR-15864/2021	BA.1.1	2021-12-02	2021	Australia	New South Wales	New South Wales	GISAID_world
hCoV-19/Lebanon/LAU-CVD-O2/2021	BA.1	2021-12-04	2021	Lebanon	Beirut	Beirut	GISAID_world
hCoV-19/Lebanon/LAU-CVD-O4/2021	BA.1.1	2021-12-06	2021	Lebanon	Beirut	Beirut	GISAID_world
hCoV-19/Mozambique/CERI-KRISP-K032759/2021	BA.1	2021-11-29	2021	Mozambique	Maputo	Maputo	GISAID_world
hCoV-19/England/MILK-2E105DD/2021	BA.1.15.1	2021-12-09	2021	United Kingdom	England	England	GISAID_world
hCoV-19/Nepal/NPHL-S-1004/2021	BA.1	2021-12-26	2021	Nepal	Bagmati	Bagmati	GISAID_world
hCoV-19/Cambodia/899919/2021	BA.1	2021-12-31	2021	Cambodia	Cambodia	Cambodia	GISAID_world
hCoV-19/Romania/B-39484/2021	BA.1.1.1	2021-12-30	2021	Romania	Bucharest	Bucharest	GISAID_world
hCoV-19/USA/GA-CDC-MMB12206232/2021	BA.1.15	2021-12-16	2021	USA	Georgia	Georgia	GISAID_world
hCoV-19/Denmark/DCGC-300759/2022	BA.2	2022-01-02	2022	Denmark	Hovedstaden	Hovedstaden	GISAID_world
hCoV-19/USA/NY-Wadsworth-21108019-01/2021	BA.1.1	2021-12-16	2021	USA	New York	New York	GISAID_world
hCoV-19/Portugal/PT24435/2021	BA.1.15	2021-12-28	2021	Portugal	Portugal	Portugal	GISAID_world
hCoV-19/Azerbaijan/MHTM2/2022	BA.1.1	2022-01-10	2022	Azerbaijan	Azerbaijan	Azerbaijan	GISAID_world
hCoV-19/Australia/ACT-2315/2021	BA.1.17	2021-12-23	2021	Australia	Australian Capital Territory	Australian Capital Territory	GISAID_world
hCoV-19/Australia/ACT-2567/2021	BA.1.17	2021-12-30	2021	Australia	Australian Capital Territory	Australian Capital Territory	GISAID_world
hCoV-19/Mexico/AGU-ISSEA_Lesp-34633-s8/2021	BA.1.1	2021-12-26	2021	Mexico	Aguascalientes	Aguascalientes	GISAID_world
hCoV-19/Denmark/DCGC-291660/2021	BA.2	2021-12-27	2021	Denmark	Midtjylland	Midtjylland	GISAID_world
hCoV-19/USA/ID-IBL-779207/2021	BA.1	2021-12-27	2021	USA	Idaho	Idaho	GISAID_world
hCoV-19/Mexico/SIN_CIAD-MZT_HJ4266/2021	BA.1	2021-12-29	2021	Mexico	Sinaloa	Sinaloa	GISAID_world
hCoV-19/Zimbabwe/QIBZIM-71014/2021	BA.1	2021-12-07	2021	Zimbabwe	Zimbabwe	Zimbabwe	GISAID_world
hCoV-19/USA/HI-H216746/2021	BA.1.1.2	2021-12-11	2021	USA	Hawaii	Hawaii	GISAID_world
hCoV-19/Australia/SA6598/2021	BA.1.17	2021-12-28	2021	Australia	South Australia	South Australia	GISAID_world
hCoV-19/Australia/SA4472/2021	BA.1.17	2021-12-26	2021	Australia	South Australia	South Australia	GISAID_world
hCoV-19/Azerbaijan/MHTM12/2022	BA.1	2022-01-10	2022	Azerbaijan	Azerbaijan	Azerbaijan	GISAID_world
hCoV-19/Azerbaijan/Aghayev_AR/2022	BA.1	2022-01-10	2022	Azerbaijan	Azerbaijan	Azerbaijan	GISAID_world
hCoV-19/Malawi/MLW-00326/2021	BA.1.13	2021-12-28	2021	Malawi	Southern Region MW	Southern Region MW	GISAID_world
hCoV-19/Suriname/SR-907/2021	BA.1	2021-12-29	2021	Suriname	Suriname	Suriname	GISAID_world
hCoV-19/Mozambique/CERI-KRISP-K033848/2021	BA.1	2021-12-08	2021	Mozambique	Maputo	Maputo	GISAID_world
hCoV-19/Italy/VEN-IZSVe-22RS8009-39_PD/2022	BA.1.17	2022-01-02	2022	Italy	Veneto	Veneto	GISAID_world
hCoV-19/Zimbabwe/QIBZIM-70369/2021	BA.1	2021-11-27	2021	Zimbabwe	Zimbabwe	Zimbabwe	GISAID_world
hCoV-19/Zimbabwe/QIBZIM-70545/2021	BA.1	2021-11-28	2021	Zimbabwe	Zimbabwe	Zimbabwe	GISAID_world
hCoV-19/Zimbabwe/QIBZIM-70543/2021	BA.1	2021-11-28	2021	Zimbabwe	Zimbabwe	Zimbabwe	GISAID_world
hCoV-19/Zimbabwe/QIBZIM-70413/2021	BA.1	2021-11-27	2021	Zimbabwe	Zimbabwe	Zimbabwe	GISAID_world
hCoV-19/Ecuador/NIC-INSPI-370092/2021	BA.1.1	2021-12-27	2021	Ecuador	Guayas	Guayas	GISAID_world
hCoV-19/Philippines/PH-PGC-102407/2021	BA.2.3	2021-12-22	2021	Philippines	Manila	Manila	GISAID_world
hCoV-19/USA/WY-WYPHL-22001910/2022	BA.1.1	2022-01-04	2022	USA	Wyoming	Wyoming	GISAID_world
hCoV-19/USA/MA-CDCBI-CRSP_2WFOVQJZ4T6Q3IYK/2021	BA.1.1	2021-12-27	2021	USA	Massachusetts	Massachusetts	GISAID_world
hCoV-19/USA/WA-CDC-UW22020281001/2022	BA.1.1	2022-02-02	2022	USA	Washington	Washington	GISAID_world
hCoV-19/Iran/AN293/2022	BA.1.1.4	2022-01-15	2022	Iran	Ilam	Ilam	GISAID_world
hCoV-19/Belize/CML-358/2022	BA.1.1	2022-01-04	2022	Belize	Stann Creek	Stann Creek	GISAID_world
hCoV-19/USA/AZ-CDC-QDX32243633/2021	BA.1	2021-12-19	2021	USA	Arizona	Arizona	GISAID_world
hCoV-19/Belize/CML-361/2022	BA.1.1	2022-01-03	2022	Belize	Corozal	Corozal	GISAID_world
hCoV-19/Australia/ACT3105/2022	BA.1.17	2022-01-25	2022	Australia	Australian Capital Territory	Australian Capital Territory	GISAID_world
hCoV-19/Djibouti/NAMRU3_A97/2021	BA.1.1	2021-12-28	2021	Djibouti	Djibouti	Djibouti	GISAID_world
hCoV-19/Djibouti/NAMRU3_A587/2021	BA.1.1	2021-12-29	2021	Djibouti	Djibouti	Djibouti	GISAID_world
hCoV-19/Djibouti/NAMRU3_A274/2022	BA.1.1	2022-01-03	2022	Djibouti	Djibouti	Djibouti	GISAID_world
hCoV-19/Djibouti/NAMRU3_H677/2021	BA.1.1	2021-12-20	2021	Djibouti	Djibouti	Djibouti	GISAID_world
hCoV-19/Djibouti/NAMRU3_CI-025/2021	BA.1.1	2021-12-30	2021	Djibouti	Djibouti	Djibouti	GISAID_world
hCoV-19/Germany/RP-RKI-I-533322/2022	BA.1	2022-02-01	2022	Germany	Rheinland-Pfalz	Rheinland-Pfalz	GISAID_world
hCoV-19/Morocco/248/2021	BA.1	2021-12-28	2021	Morocco	Rabat	Rabat	GISAID_world
hCoV-19/Morocco/208/2021	BA.1	2021-12-26	2021	Morocco	Fnidek	Fnidek	GISAID_world
hCoV-19/Turkey/HSGM-G1138/2022	BA.1.1	2022-02-11	2022	Turkey	Turkey	Turkey	GISAID_world
hCoV-19/Belgium/Jessa_11-2206-006786/2022	BA.1.1	2022-02-11	2022	Belgium	Limburg BE	Limburg BE	GISAID_world
hCoV-19/Netherlands/ZE-MVD-CWGS2200891/2022	BA.1.1	2022-02-05	2022	Netherlands	Zeeland	Zeeland	GISAID_world
hCoV-19/env/Austria/CeMM24268/2022	BA.1	2022-02-06	2022	Austria	Burgenland	Burgenland	GISAID_world
hCoV-19/Switzerland/ZH-UZH-IMV-462447dd/2022	BA.1.1.11	2022-02-05	2022	Switzerland	ZГјrich	ZГјrich	GISAID_world
hCoV-19/Netherlands/FR-RIVM-80490/2021	BA.1.1	2021-12-30	2021	Netherlands	Friesland	Friesland	GISAID_world
hCoV-19/Kenya/ILRI_COVM02495/2021	BA.1.1	2021-12-31	2021	Kenya	Migori	Migori	GISAID_world
hCoV-19/Netherlands/DR-RIVM-80310/2021	BA.1.1	2021-12-26	2021	Netherlands	Drenthe	Drenthe	GISAID_world
hCoV-19/Kenya/ILRI_COVM02600/2022	BA.1.1	2022-01-03	2022	Kenya	Kakamega	Kakamega	GISAID_world
hCoV-19/Kenya/ILRI_COVM02609/2022	BA.1.14	2022-01-04	2022	Kenya	Kakamega	Kakamega	GISAID_world
hCoV-19/Kenya/ILRI_COVM02447/2021	BA.1.17	2021-12-28	2021	Kenya	Migori	Migori	GISAID_world
hCoV-19/Australia/ACT3345/2022	BA.1.15.1	2022-02-06	2022	Australia	Australian Capital Territory	Australian Capital Territory	GISAID_world
hCoV-19/Australia/ACT3269/2022	BA.1.17	2022-02-01	2022	Australia	Australian Capital Territory	Australian Capital Territory	GISAID_world
hCoV-19/Australia/ACT3437/2022	BA.1.17	2022-02-08	2022	Australia	Australian Capital Territory	Australian Capital Territory	GISAID_world
hCoV-19/NewZealand/22CH1026/2022	BA.2	2022-02-11	2022	New Zealand	Waikato	Waikato	GISAID_world
hCoV-19/Ireland/MN-NVRL-S21IRL00582168/2021	BA.1.17	2021-12-19	2021	Ireland	Monaghan	Monaghan	GISAID_world
hCoV-19/NewZealand/22CV2002/2022	BA.1.1.9	2022-02-15	2022	New Zealand	Lakes	Lakes	GISAID_world
hCoV-19/Ireland/G-Enfer-COV020222080_A7/2022	BA.2	2022-02-02	2022	Ireland	Galway	Galway	GISAID_world
hCoV-19/SintMaarten/SX-RIVM-86476/2022	BA.1.1	2022-01-31	2022	Sint Maarten	Sint Maarten	Sint Maarten	GISAID_world
hCoV-19/Ireland/MH-Enfer-COV040222006_A7/2022	BA.2	2022-02-04	2022	Ireland	Meath	Meath	GISAID_world
hCoV-19/Ireland/CE-Enfer-COV010222043_C12/2022	BA.2	2022-02-01	2022	Ireland	Clare	Clare	GISAID_world
hCoV-19/Djibouti/NAMRU3_A361/2022	BA.1.1	2022-01-01	2022	Djibouti	Djibouti	Djibouti	GISAID_world
hCoV-19/Djibouti/NAMRU3_A674/2022	BA.1.1	2022-01-02	2022	Djibouti	Djibouti	Djibouti	GISAID_world
hCoV-19/Djibouti/NAMRU3_A130/2022	BA.1.1	2022-01-03	2022	Djibouti	Djibouti	Djibouti	GISAID_world
hCoV-19/Syria/Northwest-0157/2022	BA.1	2022-02-02	2022	Syria	Aleppo	Aleppo	GISAID_world
hCoV-19/Syria/Northwest-0156/2022	BA.1	2022-02-02	2022	Syria	Aleppo	Aleppo	GISAID_world
hCoV-19/Poland/Kce-1496/2022	BA.1.1	2022-02-07	2022	Poland	Slask	Slask	GISAID_world
hCoV-19/Palau/PW-CDC-2-5546708/2021	BA.1.1	2021-09-23	2021	Palau	Palau	Palau	GISAID_world
hCoV-19/Palau/PW-CDC-2-5546529/2021	BA.1.1	2021-09-18	2021	Palau	Palau	Palau	GISAID_world
hCoV-19/USA/ND-NDDH-11323/2022	BA.1.1	2022-02-09	2022	USA	North Dakota	North Dakota	GISAID_world
hCoV-19/Brazil/MG-FIOCRUZ-861/2022	BA.1	2022-01-05	2022	Brazil	Minas Gerais	Minas Gerais	GISAID_world
hCoV-19/France/BFC-HMN-22022070102/2022	BA.1.1.1	2022-02-03	2022	France	Bourgogne-France-ComtГ©	Bourgogne-France-ComtГ©	GISAID_world
hCoV-19/NewZealand/22CH0917/2022	BA.2	2022-02-10	2022	New Zealand	Canterbury	Canterbury	GISAID_world
hCoV-19/NewZealand/22CH1137/2022	BA.1.1.9	2022-02-12	2022	New Zealand	Southland	Southland	GISAID_world
hCoV-19/NewZealand/22MV0836/2022	BA.1.1.9	2022-02-03	2022	New Zealand	Auckland	Auckland	GISAID_world
hCoV-19/NewZealand/22CH0951/2022	BA.1.1.9	2022-02-11	2022	New Zealand	South Canterbury	South Canterbury	GISAID_world
hCoV-19/NewZealand/22CH0971/2022	BA.1.1.9	2022-02-12	2022	New Zealand	Southland	Southland	GISAID_world
hCoV-19/NewZealand/22CH1094/2022	BA.1.1.9	2022-02-12	2022	New Zealand	Nelson Marlborough	Nelson Marlborough	GISAID_world
hCoV-19/USA/MN-CDC-IBX418852884006/2022	BA.1.15	2022-02-04	2022	USA	Minnesota	Minnesota	GISAID_world
hCoV-19/NewZealand/22CH0884/2022	BA.1.1.9	2022-02-07	2022	New Zealand	Nelson Marlborough	Nelson Marlborough	GISAID_world
hCoV-19/USA/TN-VUMC-O-2216/2021	BA.1.15	2021-12-28	2021	USA	Tennessee	Tennessee	GISAID_world
hCoV-19/NewZealand/22CH1024/2022	BA.1.1.9	2022-02-12	2022	New Zealand	Southland	Southland	GISAID_world
hCoV-19/NewZealand/22CH0908/2022	BA.1.1.9	2022-02-07	2022	New Zealand	Waikato	Waikato	GISAID_world
hCoV-19/NewZealand/22CH0882/2022	BA.2	2022-02-07	2022	New Zealand	Canterbury	Canterbury	GISAID_world
hCoV-19/NewZealand/22CH0950/2022	BA.2	2022-02-11	2022	New Zealand	South Canterbury	South Canterbury	GISAID_world
hCoV-19/NewZealand/22CH1040/2022	BA.1.1.9	2022-02-14	2022	New Zealand	Canterbury	Canterbury	GISAID_world
hCoV-19/Brunei/9822003256/2022	BA.1	2022-01-08	2022	Brunei	Brunei	Brunei	GISAID_world
hCoV-19/NewZealand/22MV0898/2022	BA.1.1.9	2022-02-13	2022	New Zealand	Auckland	Auckland	GISAID_world
hCoV-19/CostaRica/INC-2923-739927/2022	BA.1.1	2022-01-29	2022	Costa Rica	Costa Rica	Costa Rica	GISAID_world
hCoV-19/CostaRica/INC-2891-737867/2022	BA.1.15	2022-01-19	2022	Costa Rica	Limon	Limon	GISAID_world
hCoV-19/Zambia/CHAZ-CHS0734/2021	BA.1	2021-12-21	2021	Zambia	Eastern Zambia	Eastern Zambia	GISAID_world
hCoV-19/USA/VA-CDC-ASC210650765/2022	BA.1.1	2022-02-04	2022	USA	Virginia	Virginia	GISAID_world
hCoV-19/England/MILK-371CF04/2022	BA.1.17	2022-02-15	2022	United Kingdom	England	England	GISAID_world
hCoV-19/Denmark/DCGC-381965/2022	BA.2	2022-02-15	2022	Denmark	Midtjylland	Midtjylland	GISAID_world
hCoV-19/SouthAfrica/NICD-N34243/2022	BA.2	2022-02-01	2022	South Africa	Mpumalanga	Mpumalanga	GISAID_world
hCoV-19/Canada/NL-PHML-323003/2022	BA.1.1	2022-01-19	2022	Canada	Newfoundland and Labrador	Newfoundland and Labrador	GISAID_world
hCoV-19/USA/SD-CDC-2-5589007/2022	BA.1.1.16	2022-02-02	2022	USA	South Dakota	South Dakota	GISAID_world
hCoV-19/USA/FL-BPHL-1541/2022	BA.1.1	2022-01-26	2022	USA	Florida	Florida	GISAID_world
hCoV-19/Italy/LAZ-AMC-211228977-DS/2021	BA.1.17	2021-12-28	2021	Italy	Lazio	Lazio	GISAID_world
hCoV-19/USA/MN-MDH-22570/2022	BA.1.1	2022-02-07	2022	USA	Minnesota	Minnesota	GISAID_world
hCoV-19/env/Liechtenstein/CeMM24340/2022	BA.1	2022-02-06	2022	Liechtenstein	Liechtenstein	Liechtenstein	GISAID_world
hCoV-19/Canada/BC-BCCDC-323784/2022	BA.1	2022-01-09	2022	Canada	British Columbia	British Columbia	GISAID_world
hCoV-19/Poland/5782786780/2022	BA.1.1.1	2022-02-22	2022	Poland	Poland	Poland	GISAID_world
hCoV-19/Mexico/MEX-INMEGEN-58-258/2022	BA.1.1	2022-02-04	2022	Mexico	Estado de Mexico	Estado de Mexico	GISAID_world
hCoV-19/Mexico/CMX-INMEGEN-58-361/2022	BA.1.1	2022-02-08	2022	Mexico	Mexico City	Mexico City	GISAID_world
hCoV-19/USA/AR-CDC-QDX33478841/2022	BA.1.1	2022-01-31	2022	USA	Arkansas	Arkansas	GISAID_world
hCoV-19/Switzerland/AG-ETHZ-35964626/2022	BA.2	2022-01-24	2022	Switzerland	Aargau	Aargau	GISAID_world
hCoV-19/Switzerland/ZH-ETHZ-35795629/2022	BA.1.1.11	2022-01-16	2022	Switzerland	ZГјrich	ZГјrich	GISAID_world
hCoV-19/Cameroon/DO334088/2021	BA.1.1.14	2021-12-15	2021	Cameroon	YaoundГ©	YaoundГ©	GISAID_world
hCoV-19/Cameroon/EXTN-17044/2021	BA.1.17	2021-12-12	2021	Cameroon	YaoundГ©	YaoundГ©	GISAID_world
hCoV-19/Cameroon/DO334112/2021	BA.1.15	2021-12-15	2021	Cameroon	YaoundГ©	YaoundГ©	GISAID_world
hCoV-19/Australia/VIC39894/2022	BA.1.17	2022-02-01	2022	Australia	Victoria	Victoria	GISAID_world
hCoV-19/Peru/JUN-13451/2022	BA.1	2022-01-14	2022	Peru	Junin	Junin	GISAID_world
hCoV-19/USA/TN-ASC-210651073/2022	BA.1.1	2022-02-04	2022	USA	Tennessee	Tennessee	GISAID_world
hCoV-19/Malta/MDxMDHO126/2022	BA.1	2022-02-08	2022	Malta	Malta	Malta	GISAID_world
hCoV-19/Ecuador/USFQ-2696/2022	BA.1	2022-01-20	2022	Ecuador	Imbabura	Imbabura	GISAID_world
hCoV-19/Guadeloupe/CERBAHC-02150707/2022	BA.1.1	2022-02-07	2022	Guadeloupe	Guadeloupe	Guadeloupe	GISAID_world
hCoV-19/CzechRepublic/NAT-22-15404/2022	BA.1.17	2022-02-06	2022	Czech Republic	Prague	Prague	GISAID_world
hCoV-19/Croatia/28368/2022	BA.1.1	2022-02-01	2022	Croatia	Zagreb	Zagreb	GISAID_world
hCoV-19/Croatia/27821/2022	BA.1.1	2022-01-31	2022	Croatia	Split-Dalmatia County	Split-Dalmatia County	GISAID_world
hCoV-19/Croatia/28714/2022	BA.1	2022-02-02	2022	Croatia	Zagreb	Zagreb	GISAID_world
hCoV-19/Croatia/28741/2022	BA.1.1	2022-02-03	2022	Croatia	Zagreb	Zagreb	GISAID_world
hCoV-19/Peru/LIM-UPCH-2734/2022	BA.1.17	2022-02-07	2022	Peru	Lima	Lima	GISAID_world
hCoV-19/Estonia/RC0365296/2022	BA.1.1	2022-01-22	2022	Estonia	Estonia	Estonia	GISAID_world
hCoV-19/Peru/LIM-UPCH-2788/2022	BA.1.15	2022-02-07	2022	Peru	Lima	Lima	GISAID_world
hCoV-19/Peru/LIM-UPCH-2787/2022	BA.1	2022-02-07	2022	Peru	Lima	Lima	GISAID_world
hCoV-19/Peru/LIM-UPCH-2796/2022	BA.1.1	2022-02-07	2022	Peru	Lima	Lima	GISAID_world
hCoV-19/India/KA-0902NARA026/2022	BA.2	2022-02-07	2022	India	Karnataka	Karnataka	GISAID_world
hCoV-19/Cameroon/DO334072V14/2021	BA.1	2021-12-14	2021	Cameroon	YaoundГ©	YaoundГ©	GISAID_world
hCoV-19/Latvia/2201031296/2022	BA.1.13	2022-01-10	2022	Latvia	Riga	Riga	GISAID_world
hCoV-19/Latvia/2112094627/2021	BA.1.13	2021-12-29	2021	Latvia	Latvia	Latvia	GISAID_world
hCoV-19/Latvia/3873978/2022	BA.1	2022-01-07	2022	Latvia	Jelgava	Jelgava	GISAID_world
hCoV-19/Estonia/5261131-01/2022	BA.1	2022-01-09	2022	Estonia	Estonia	Estonia	GISAID_world
hCoV-19/Slovakia/run220216_RUVZ_TN-22-0423/2022	BA.1.1	2022-02-16	2022	Slovakia	TrenДЌГ­n	TrenДЌГ­n	GISAID_world
hCoV-19/Ireland/MN-NVRL-S22IRL00063521/2022	BA.1.1.15	2022-01-16	2022	Ireland	Monaghan	Monaghan	GISAID_world
hCoV-19/Croatia/22746/2022	BA.1.17	2022-01-07	2022	Croatia	VaraЕѕdin County	VaraЕѕdin County	GISAID_world
hCoV-19/BosniaandHerzegovina/VFS-UNSA-LMGFI1139/2022	BA.1.17	2022-01-05	2022	Bosnia and Herzegovina	Sarajevo	Sarajevo	GISAID_world
hCoV-19/Malta/MDxMDHO147/2022	BA.1	2022-01-08	2022	Malta	Malta	Malta	GISAID_world
hCoV-19/Mexico/MEX-INMEGEN-56-312/2022	BA.1.1.16	2022-01-26	2022	Mexico	Estado de Mexico	Estado de Mexico	GISAID_world
hCoV-19/Slovakia/uvzsr-BA_22_00103-H03-BA_22_00003143/2022	BA.1	2022-01-15	2022	Slovakia	Nitra	Nitra	GISAID_world
hCoV-19/Mexico/MOR-INER-IBT-1554/2022	BA.1	2022-01-24	2022	Mexico	Morelos	Morelos	GISAID_world
hCoV-19/SouthKorea/KDCA28139/2022	BA.1.1	2022-01-12	2022	South Korea	South Korea	South Korea	GISAID_world
hCoV-19/Denmark/DCGC-359848/2022	BA.2	2022-02-05	2022	Denmark	Midtjylland	Midtjylland	GISAID_world
hCoV-19/Montenegro/134117/2022	BA.2	2022-02-07	2022	Montenegro	Podgorica	Podgorica	GISAID_world
hCoV-19/Montenegro/134663/2022	BA.2	2022-02-08	2022	Montenegro	Podgorica	Podgorica	GISAID_world
hCoV-19/Guatemala/598-LNSGua/2022	BA.1.1	2022-01-07	2022	Guatemala	Jalapa	Jalapa	GISAID_world
hCoV-19/Guatemala/1479-LNSGua/2022	BA.1.1	2022-01-19	2022	Guatemala	Quiche	Quiche	GISAID_world
hCoV-19/Guatemala/1335-LNSGua/2022	BA.1.1	2022-01-18	2022	Guatemala	Chimaltenango	Chimaltenango	GISAID_world
hCoV-19/Malaysia/UNIMAS-GHML881/2022	BA.1.1	2022-02-04	2022	Malaysia	Sarawak	Sarawak	GISAID_world
hCoV-19/Malaysia/UNIMAS-GHML880/2022	BA.1.1	2022-02-04	2022	Malaysia	Sarawak	Sarawak	GISAID_world
hCoV-19/Brazil/SP-IB_150312/2022	BA.1	2022-02-05	2022	Brazil	SГЈo Paulo	SГЈo Paulo	GISAID_world
hCoV-19/Brazil/SP-IB_150433/2022	BA.1.14	2022-02-05	2022	Brazil	SГЈo Paulo	SГЈo Paulo	GISAID_world
hCoV-19/Brazil/SP-IB_150248/2022	BA.1.14	2022-02-05	2022	Brazil	SГЈo Paulo	SГЈo Paulo	GISAID_world
hCoV-19/Brazil/SP-IB_150350/2022	BA.1.14	2022-02-05	2022	Brazil	SГЈo Paulo	SГЈo Paulo	GISAID_world
hCoV-19/Brazil/SP-IB_150114/2022	BA.1.1	2022-02-04	2022	Brazil	SГЈo Paulo	SГЈo Paulo	GISAID_world
hCoV-19/Sweden/01_SE100_22CS101433/2022	BA.2	2022-02-01	2022	Sweden	Stockholm	Stockholm	GISAID_world
hCoV-19/Guatemala/INC-LNS-160/2022	BA.1.1	2022-01-02	2022	Guatemala	Peten	Peten	GISAID_world
hCoV-19/Guatemala/INC-LNS-161/2022	BA.1.1	2022-01-02	2022	Guatemala	Peten	Peten	GISAID_world
hCoV-19/Guatemala/INC-LNS-189/2022	BA.1	2022-01-06	2022	Guatemala	Guatemala	Guatemala	GISAID_world
hCoV-19/CzechRepublic/FNP0860/2022	BA.1.1	2022-02-05	2022	Czech Republic	PlzeЕ€ Region	PlzeЕ€ Region	GISAID_world
hCoV-19/Guatemala/INC-LNS-197/2021	BA.1.1	2021-12-30	2021	Guatemala	Guatemala	Guatemala	GISAID_world
hCoV-19/Canada/NS-NML-322739/2022	BA.1.1	2022-01-22	2022	Canada	Nova Scotia	Nova Scotia	GISAID_world
hCoV-19/Peru/LIM-UPCH-2592/2022	BA.1.15	2022-01-31	2022	Peru	Lima	Lima	GISAID_world
hCoV-19/Canada/NS-NML-322674/2022	BA.1.1	2022-01-23	2022	Canada	Nova Scotia	Nova Scotia	GISAID_world
hCoV-19/Australia/NSW-ICPMR-20373/2022	BA.1.17	2022-02-04	2022	Australia	New South Wales	New South Wales	GISAID_world
hCoV-19/Australia/NSW-ICPMR-20174/2022	BA.1.1	2022-01-31	2022	Australia	New South Wales	New South Wales	GISAID_world
hCoV-19/England/ALDP-358AE7F/2022	BA.1.1	2022-02-03	2022	United Kingdom	England	England	GISAID_world
hCoV-19/Brazil/PE-FIOCRUZ-IAM8345/2022	BA.1	2022-01-22	2022	Brazil	Pernambuco	Pernambuco	GISAID_world
hCoV-19/Canada/NL-NML-306476/2022	BA.1.1	2022-01-06	2022	Canada	Newfoundland and Labrador	Newfoundland and Labrador	GISAID_world
hCoV-19/USA/IA-SHL-2035648/2022	BA.1.1	2022-02-03	2022	USA	Iowa	Iowa	GISAID_world
hCoV-19/Slovakia/run220209_RUVZ_TN-22-0319/2022	BA.1.1	2022-02-09	2022	Slovakia	TrenДЌГ­n	TrenДЌГ­n	GISAID_world
hCoV-19/CzechRepublic/UKDD-ZUUL-D20220078/2022	BA.1.17	2022-01-03	2022	Czech Republic	Czech Republic	Czech Republic	GISAID_world
hCoV-19/SouthAfrica/CERI-KRISP-K034860/2022	BA.1	2022-01-06	2022	South Africa	KwaZulu-Natal	KwaZulu-Natal	GISAID_world
hCoV-19/Germany/BW-RKI-I-432868/2022	BA.1.17	2022-01-04	2022	Germany	Baden-Wuerttemberg	Baden-Wuerttemberg	GISAID_world
hCoV-19/Philippines/PH-RITM-952/2022	BA.2.3	2022-02-02	2022	Philippines	Eastern Visayas	Eastern Visayas	GISAID_world
hCoV-19/Philippines/PH-RITM-955/2022	BA.2.3	2022-02-02	2022	Philippines	Western Visayas	Western Visayas	GISAID_world
hCoV-19/Mauritius/4423/2022	BA.1.1.1	2022-01-27	2022	Mauritius	Rodrigues	Rodrigues	GISAID_world
hCoV-19/Indonesia/BT-NIHRD-MI.22.13674/2022	BA.2	2022-02-05	2022	Indonesia	Banten	Banten	GISAID_world
hCoV-19/Germany/BW-RKI-I-456380/2022	BA.1.1	2022-01-11	2022	Germany	Baden-Wuerttemberg	Baden-Wuerttemberg	GISAID_world
hCoV-19/HongKong/HKU-220213-040/2022	BA.2.2	2022-01-21	2022	Hong Kong	Hong Kong	Hong Kong	GISAID_world
hCoV-19/HongKong/HKU-220213-357/2022	BA.1.1	2022-01-13	2022	Hong Kong	Hong Kong	Hong Kong	GISAID_world
hCoV-19/Singapore/1349/2022	BA.1.1	2022-02-04	2022	Singapore	Singapore	Singapore	GISAID_world
hCoV-19/Netherlands/GR-UMCG-MMB_4692/2022	BA.1.1.1	2022-02-10	2022	Netherlands	Groningen	Groningen	GISAID_world
hCoV-19/Ireland/WX-NVRL-S22IRL00065434/2022	BA.1.1	2022-01-17	2022	Ireland	Wexford	Wexford	GISAID_world
hCoV-19/Luxembourg/LNS7320823/2022	BA.1.1.1	2022-01-25	2022	Luxembourg	Luxembourg	Luxembourg	GISAID_world
hCoV-19/Austria/LB-R00059-S158/2022	BA.2	2022-02-03	2022	Austria	Vienna	Vienna	GISAID_world
hCoV-19/Austria/LB-R00059-S326/2022	BA.2	2022-02-03	2022	Austria	Vienna	Vienna	GISAID_world
hCoV-19/NorthernMarianaIslands/MP-CDC-2-5546711/2022	BA.1.15	2022-01-20	2022	USA	Northern Mariana Islands	Northern Mariana Islands	GISAID_world
hCoV-19/Luxembourg/LNS0408012/2022	BA.1	2022-02-05	2022	Luxembourg	Luxembourg	Luxembourg	GISAID_world
hCoV-19/Luxembourg/LNS4401871/2022	BA.1.1	2022-02-02	2022	Luxembourg	Luxembourg	Luxembourg	GISAID_world
hCoV-19/NorthernMarianaIslands/MP-CDC-2-5546639/2022	BA.1.15	2022-01-19	2022	USA	Northern Mariana Islands	Northern Mariana Islands	GISAID_world
hCoV-19/Luxembourg/LNS9967322/2022	BA.1.1.1	2022-02-02	2022	Luxembourg	Luxembourg	Luxembourg	GISAID_world
hCoV-19/Australia/WA1353/2022	BA.1.17	2022-02-05	2022	Australia	Western Australia	Western Australia	GISAID_world
hCoV-19/Brazil/AM-FIOCRUZ-ILMD2203096/2022	BA.1	2022-01-19	2022	Brazil	Amazonas BR	Amazonas BR	GISAID_world
hCoV-19/USA/VA-CDC-LC0529520/2022	BA.1.1	2022-02-02	2022	USA	Virginia	Virginia	GISAID_world
hCoV-19/USA/SC-CDC-LC0529550/2022	BA.1.1	2022-02-02	2022	USA	South Carolina	South Carolina	GISAID_world
hCoV-19/USA/TX-CDC-LC0530225/2022	BA.1.1	2022-02-02	2022	USA	Texas	Texas	GISAID_world
hCoV-19/Finland/THL-202205271/2022	BA.1	2022-01-14	2022	Finland	Finland	Finland	GISAID_world
hCoV-19/Singapore/1679/2022	BA.1.1	2022-02-13	2022	Singapore	Singapore	Singapore	GISAID_world
hCoV-19/Ukraine/16-68934/2022	BA.1.1	2022-01-19	2022	Ukraine	Poltava	Poltava	GISAID_world
hCoV-19/Ukraine/52-69019/2022	BA.1	2022-01-21	2022	Ukraine	Cherkasy	Cherkasy	GISAID_world
hCoV-19/USA/SD-CDC-ASC210692969/2022	BA.1.1	2022-02-03	2022	USA	South Dakota	South Dakota	GISAID_world
hCoV-19/Japan/RIMD05119/2022	BA.1.1.1	2022-01-15	2022	Japan	Osaka	Osaka	GISAID_world
hCoV-19/Mexico/CHP-INMEGEN-58-84/2022	BA.1.1	2022-02-06	2022	Mexico	Chiapas	Chiapas	GISAID_world
hCoV-19/Belgium/CHUNamur14021804/2022	BA.1.1	2022-02-04	2022	Belgium	Namur	Namur	GISAID_world
hCoV-19/Chile/AN-21609/2022	BA.1.1	2022-02-01	2022	Chile	Antofagasta	Antofagasta	GISAID_world
hCoV-19/Chile/RM-24747/2022	BA.1.1	2022-02-08	2022	Chile	Region Metropolitana de Santiago	Region Metropolitana de Santiago	GISAID_world
hCoV-19/Chile/MA-23438/2022	BA.1.1	2022-02-03	2022	Chile	Magallanes	Magallanes	GISAID_world
hCoV-19/Chile/LL-25703/2022	BA.1.1	2022-02-09	2022	Chile	Los Lagos	Los Lagos	GISAID_world
hCoV-19/Chile/AT-25623/2022	BA.1.1	2022-02-08	2022	Chile	Atacama	Atacama	GISAID_world
hCoV-19/Mongolia/UB-403936/2021	BA.1.1	2021-12-02	2021	Mongolia	Mongolia	Mongolia	GISAID_world
hCoV-19/Argentina/INEI119183/2022	BA.1.1	2022-01-04	2022	Argentina	Chubut	Chubut	GISAID_world
hCoV-19/Argentina/INEI119225/2022	BA.1.1	2022-02-05	2022	Argentina	Argentina	Argentina	GISAID_world
hCoV-19/Argentina/INEI119118/2022	BA.1	2022-02-02	2022	Argentina	Buenos Aires	Buenos Aires	GISAID_world
hCoV-19/Guadeloupe/IPP06472/2022	BA.1.1	2022-01-24	2022	Guadeloupe	Les Abymes	Les Abymes	GISAID_world
hCoV-19/Sweden/01_SE100_22CS501780/2022	BA.2	2022-02-07	2022	Sweden	Stockholm	Stockholm	GISAID_world
hCoV-19/DominicanRepublic/1845731-LNSPDD/2022	BA.1	2022-02-02	2022	Dominican Republic	Santo Domingo	Santo Domingo	GISAID_world
hCoV-19/Colombia/VAC-ICE-SCOV-851/2022	BA.1.1	2022-01-18	2022	Colombia	Valle del Cauca	Valle del Cauca	GISAID_world
hCoV-19/Slovenia/30050/2022	BA.1.1	2022-01-10	2022	Slovenia	Slovenia	Slovenia	GISAID_world
hCoV-19/Scotland/QEUH-35C9B40/2022	BA.1.1	2022-02-05	2022	United Kingdom	Scotland	Scotland	GISAID_world
hCoV-19/Turkey/HSGM-G735/2022	BA.1	2022-01-31	2022	Turkey	Turkey	Turkey	GISAID_world
hCoV-19/Guadeloupe/CERBAHC-0121811/2022	BA.1.1	2022-01-31	2022	Guadeloupe	Guadeloupe	Guadeloupe	GISAID_world
hCoV-19/Greece/5729/2022	BA.1.1	2022-01-17	2022	Greece	Attica	Attica	GISAID_world
hCoV-19/Canada/BC-BCCDC-340827/2022	BA.1.1	2022-01-19	2022	Canada	British Columbia	British Columbia	GISAID_world
hCoV-19/Spain/CT-HUB03912/2022	BA.1.17	2022-02-05	2022	Spain	Catalunya	Catalunya	GISAID_world
hCoV-19/Spain/CT-HUB03986/2022	BA.1.1	2022-01-30	2022	Spain	Catalunya	Catalunya	GISAID_world
hCoV-19/USA/IL-CDC-LC0516402/2022	BA.1.15	2022-01-25	2022	USA	Illinois	Illinois	GISAID_world
hCoV-19/Ecuador/NIC-INSPI-398087/2022	BA.1.1	2022-02-01	2022	Ecuador	Guayas	Guayas	GISAID_world
hCoV-19/Ecuador/NIC-INSPI-397941/2022	BA.1.1	2022-02-01	2022	Ecuador	Guayas	Guayas	GISAID_world
hCoV-19/Mexico/CAM_CIAD-IMSS_202201004854/2022	BA.1.1	2022-02-04	2022	Mexico	Campeche	Campeche	GISAID_world
hCoV-19/Mexico/ROO_CIAD-IMSS_202201004693/2022	BA.1.1	2022-02-03	2022	Mexico	Quintana Roo	Quintana Roo	GISAID_world
hCoV-19/Mexico/HID_CIAD-IMSS_202201028362/2022	BA.1.1	2022-02-01	2022	Mexico	Hidalgo	Hidalgo	GISAID_world
hCoV-19/Mexico/HID_CIAD-IMSS_202201028358/2022	BA.1.1	2022-02-01	2022	Mexico	Hidalgo	Hidalgo	GISAID_world
hCoV-19/Mexico/NLE_CIAD-IMSS_202201013535/2022	BA.1.15	2022-02-04	2022	Mexico	Nuevo Leon	Nuevo Leon	GISAID_world
hCoV-19/Mexico/JAL_CIAD-IMSS_202201010886/2022	BA.1.1	2022-02-01	2022	Mexico	Jalisco	Jalisco	GISAID_world
hCoV-19/Mexico/JAL_CIAD-IMSS_202201010890/2022	BA.1.1	2022-02-01	2022	Mexico	Jalisco	Jalisco	GISAID_world
hCoV-19/Mexico/DUR_CIAD-IMSS_202201012610/2022	BA.1.1	2022-02-02	2022	Mexico	Durango	Durango	GISAID_world
hCoV-19/Mexico/NLE_CIAD-IMSS_202201013494/2022	BA.1.1	2022-02-05	2022	Mexico	Nuevo Leon	Nuevo Leon	GISAID_world
hCoV-19/Mexico/MEX_CIAD-IMSS_202201028127/2022	BA.1	2022-02-01	2022	Mexico	Estado de Mexico	Estado de Mexico	GISAID_world
hCoV-19/Mexico/NAY_CIAD-IMSS_202201011067/2022	BA.1.1	2022-02-01	2022	Mexico	Nayarit	Nayarit	GISAID_world
hCoV-19/Jordan/Biolab0526/2022	BA.2	2022-01-03	2022	Jordan	Amman	Amman	GISAID_world
hCoV-19/Mexico/TLA_CIAD-IMSS_202201028047/2022	BA.1.1	2022-01-31	2022	Mexico	Tlaxcala	Tlaxcala	GISAID_world
hCoV-19/ElSalvador/INC-LNSP-130/2022	BA.1.1	2022-01-15	2022	El Salvador	Cuscatlan	Cuscatlan	GISAID_world
hCoV-19/ElSalvador/INC-LNSP-129/2022	BA.1.1	2022-01-15	2022	El Salvador	La Libertad SV	La Libertad SV	GISAID_world
hCoV-19/ElSalvador/INC-LNSP-166/2022	BA.1.15	2022-01-21	2022	El Salvador	San Vicente	San Vicente	GISAID_world
hCoV-19/ElSalvador/INC-LNSP-170/2022	BA.1.1	2022-01-22	2022	El Salvador	San Miguel	San Miguel	GISAID_world
hCoV-19/Poland/PZH-UMB-15819/2022	BA.1.1	2022-02-03	2022	Poland	Mazowieckie	Mazowieckie	GISAID_world
hCoV-19/ElSalvador/INC-LNSP-154/2022	BA.1.15	2022-01-19	2022	El Salvador	La Libertad SV	La Libertad SV	GISAID_world
hCoV-19/ElSalvador/INC-LNSP-163/2022	BA.1.1	2022-01-20	2022	El Salvador	La Paz SV	La Paz SV	GISAID_world
hCoV-19/ElSalvador/INC-LNSP-157/2022	BA.1.1	2022-01-19	2022	El Salvador	Cabanas	Cabanas	GISAID_world
hCoV-19/ElSalvador/INC-LNSP-148/2022	BA.1.1	2022-01-18	2022	El Salvador	La Paz SV	La Paz SV	GISAID_world
hCoV-19/ElSalvador/INC-LNSP-149/2022	BA.1.1	2022-01-18	2022	El Salvador	San Vicente	San Vicente	GISAID_world
hCoV-19/USA/PA-CDC-LC0510745/2022	BA.1	2022-01-27	2022	USA	Pennsylvania	Pennsylvania	GISAID_world
hCoV-19/Moldova/Nr-6959/2022	BA.1	2022-01-25	2022	Moldova	Cimislia	Cimislia	GISAID_world
hCoV-19/Congo/RC-481/2021	BA.1.15.1	2021-12-11	2021	Republic of the Congo	Brazzaville	Brazzaville	GISAID_world
hCoV-19/USA/CO-CDPHE-2102890074/2022	BA.1.1	2022-02-07	2022	USA	Colorado	Colorado	GISAID_world
hCoV-19/Brazil/SC-FIOCRUZ-3168/2022	BA.1	2022-01-08	2022	Brazil	Santa Catarina	Santa Catarina	GISAID_world
hCoV-19/Canada/ON-PHL-22-06816-v2/2022	BA.1	2022-01-19	2022	Canada	Ontario	Ontario	GISAID_world
hCoV-19/Australia/NT-RDH-153/2022	BA.1.17	2022-01-31	2022	Australia	Northern Territory	Northern Territory	GISAID_world
hCoV-19/Australia/NT-RDH-101/2022	BA.1.17	2022-01-08	2022	Australia	Northern Territory	Northern Territory	GISAID_world
hCoV-19/Australia/NT-RDH-151/2022	BA.1.17	2022-02-01	2022	Australia	Northern Territory	Northern Territory	GISAID_world
hCoV-19/Australia/NT-RDH-165/2022	BA.1.17	2022-02-07	2022	Australia	Northern Territory	Northern Territory	GISAID_world
hCoV-19/Australia/NT-RDH-131/2022	BA.1.17	2022-01-21	2022	Australia	Northern Territory	Northern Territory	GISAID_world
hCoV-19/Australia/NT-RDH-166/2022	BA.1.17	2022-02-02	2022	Australia	Northern Territory	Northern Territory	GISAID_world
hCoV-19/Thailand/DMSc-07854/2022	BA.2	2022-02-04	2022	Thailand	Bangkok	Bangkok	GISAID_world
hCoV-19/Gambia/19944/2022	BA.1.1	2022-01-05	2022	Gambia	Kombo	Kombo	GISAID_world
hCoV-19/USA/NM-TG1229254/2022	BA.1.1	2022-01-25	2022	USA	New Mexico	New Mexico	GISAID_world
hCoV-19/USA/SC-CDC-MMB13971477/2022	BA.1.1	2022-01-27	2022	USA	South Carolina	South Carolina	GISAID_world
hCoV-19/Australia/SA104558/2022	BA.2	2022-01-30	2022	Australia	South Australia	South Australia	GISAID_world
hCoV-19/Australia/SA103973/2022	BA.1.17	2022-01-30	2022	Australia	South Australia	South Australia	GISAID_world
hCoV-19/USA/CA-CDC-ASC210546422/2022	BA.1.15	2022-01-28	2022	USA	California	California	GISAID_world
hCoV-19/USA/OK-CDC-ASC210689382/2022	BA.1.1	2022-01-29	2022	USA	Oklahoma	Oklahoma	GISAID_world
hCoV-19/USA/RI-CDC-ASC210647869/2022	BA.1.1	2022-02-01	2022	USA	Rhode Island	Rhode Island	GISAID_world
hCoV-19/Slovenia/149618/2022	BA.1.1	2022-02-01	2022	Slovenia	Slovenia	Slovenia	GISAID_world
hCoV-19/Slovenia/154033/2022	BA.1.1	2022-02-02	2022	Slovenia	Slovenia	Slovenia	GISAID_world
hCoV-19/Slovenia/148628/2022	BA.1.1	2022-02-01	2022	Slovenia	Slovenia	Slovenia	GISAID_world
hCoV-19/Slovenia/107841/2022	BA.1.1.3	2022-01-24	2022	Slovenia	Slovenia	Slovenia	GISAID_world
hCoV-19/USA/WI-CDC-LC0519016/2022	BA.1.1	2022-01-26	2022	USA	Wisconsin	Wisconsin	GISAID_world
hCoV-19/Estonia/RC0366383/2022	BA.1.1	2022-01-22	2022	Estonia	Estonia	Estonia	GISAID_world
hCoV-19/SouthAfrica/NICD-N33410/2022	BA.2	2022-01-06	2022	South Africa	Limpopo	Limpopo	GISAID_world
hCoV-19/SouthAfrica/NICD-N33519/2022	BA.2	2022-01-19	2022	South Africa	Mpumalanga	Mpumalanga	GISAID_world
hCoV-19/Romania/IS-7317/2022	BA.1	2022-01-26	2022	Romania	Iasi	Iasi	GISAID_world
hCoV-19/Romania/MS-6456/2022	BA.1.17	2022-01-26	2022	Romania	Mures	Mures	GISAID_world
hCoV-19/USA/PA-CDC-LC0517217/2022	BA.1	2022-02-02	2022	USA	Pennsylvania	Pennsylvania	GISAID_world
hCoV-19/Qatar/QA-QU-18-34-B2/2021	BA.2	2021-12-26	2021	Qatar	Doha	Doha	GISAID_world
hCoV-19/Spain/CT-HUVH-E536902/2022	BA.1.1	2022-01-12	2022	Spain	Catalunya	Catalunya	GISAID_world
hCoV-19/Bonaire/BQ-RIVM-81219/2022	BA.1.1	2022-01-03	2022	Bonaire	Bonaire	Bonaire	GISAID_world
hCoV-19/Bonaire/BQ-RIVM-80942/2021	BA.1.1	2021-12-30	2021	Bonaire	Bonaire	Bonaire	GISAID_world
hCoV-19/Bonaire/BQ-RIVM-80958/2021	BA.1	2021-12-31	2021	Bonaire	Bonaire	Bonaire	GISAID_world
hCoV-19/AmericanSamoa/AS-CDC-2-5343532/2021	BA.1.1	2021-12-09	2021	USA	American Samoa	American Samoa	GISAID_world
hCoV-19/Netherlands/UT-RIVM-81787/2022	BA.1.17	2022-01-03	2022	Netherlands	Utrecht	Utrecht	GISAID_world
hCoV-19/Norway/33045/2021	BA.1.15	2021-12-15	2021	Norway	Viken	Viken	GISAID_world
hCoV-19/Tunisia/S1579/2021	BA.1	2021-12-02	2021	Africa	Africa	Africa	GISAID_world
hCoV-19/Mexico/QUE_InDRE_FB53986_E_S10060/2021	BA.1	2021-12-14	2021	Mexico	Extra	Extra	GISAID_world
hCoV-19/Sweden/01_SE100_22CS100528/2022	BA.2	2022-01-14	2022	Sweden	Stockholm	Stockholm	GISAID_world
hCoV-19/USA/NV-CDC-LC0469477/2021	BA.1	2021-12-29	2021	USA	Nevada	Nevada	GISAID_world
hCoV-19/Singapore/812/2022	BA.2	2022-01-19	2022	Singapore	Singapore	Singapore	GISAID_world
hCoV-19/USA/MA-CDCBI-CRSP_46IA5M67G6KAMZAJ/2022	BA.1.1	2022-01-20	2022	USA	Massachusetts	Massachusetts	GISAID_world
hCoV-19/England/MILK-330F75B/2022	BA.1.1	2022-01-17	2022	United Kingdom	England	England	GISAID_world
hCoV-19/USA/TX-CDC-ASC210562904/2021	BA.1.15	2021-12-30	2021	USA	Texas	Texas	GISAID_world
hCoV-19/Turkey/HSGM-F18378/2022	BA.1	2022-01-14	2022	Turkey	Turkey	Turkey	GISAID_world
hCoV-19/TrinidadandTobago/126876/2022	BA.1.15	2022-01-17	2022	Trinidad and Tobago	Trinidad and Tobago	Trinidad and Tobago	GISAID_world
hCoV-19/Mexico/COL_InDRE_FB757_E06313447264_S10556/2022	BA.1.1	2022-01-03	2022	Mexico	Colima	Colima	GISAID_world
hCoV-19/Mexico/MEX-INMEGEN-49-180/2021	BA.1.17	2021-12-30	2021	Mexico	Estado de Mexico	Estado de Mexico	GISAID_world
hCoV-19/Cambodia/901192/2022	BA.1.1	2022-01-04	2022	Cambodia	Cambodia	Cambodia	GISAID_world
hCoV-19/Denmark/DCGC-368158/2022	BA.2	2022-02-09	2022	Denmark	Midtjylland	Midtjylland	GISAID_world
hCoV-19/SaudiArabia/KFSHRC_0125Y/2021	BA.1.1	2021-12-20	2021	Saudi Arabia	Riyadh	Riyadh	GISAID_world
hCoV-19/Canada/MB-NML-260515-2B/2021	BA.1.14	2021-11-30	2021	Canada	Manitoba	Manitoba	GISAID_world
hCoV-19/Canada/MB-NML-260515-2A/2021	BA.1.14	2021-11-30	2021	Canada	Manitoba	Manitoba	GISAID_world
hCoV-19/USA/VT-CDCBI-CRSP_KANENFVPOCJ6KXTM/2022	BA.1.1	2022-01-12	2022	USA	Vermont	Vermont	GISAID_world
hCoV-19/USA/VT-CDCBI-CRSP_IUOBWXGOEIPH3HYL/2022	BA.1	2022-02-10	2022	USA	Vermont	Vermont	GISAID_world
hCoV-19/USA/VT-CDCBI-CRSP_G6K24J6FJIWKFRKR/2022	BA.1.1	2022-02-10	2022	USA	Vermont	Vermont	GISAID_world
hCoV-19/Brunei/7121302361/2021	BA.1.17	2021-12-31	2021	Brunei	Brunei	Brunei	GISAID_world
hCoV-19/Turkey/HSGM-F18943/2022	BA.1	2022-01-18	2022	Turkey	Turkey	Turkey	GISAID_world
hCoV-19/Mexico/SIN-INMEGEN-51-206/2021	BA.1.1	2021-12-31	2021	Mexico	Sinaloa	Sinaloa	GISAID_world
hCoV-19/Mexico/MOR_InDRE_FB1262_E17313481507_S10850/2022	BA.1.1	2022-01-04	2022	Mexico	Morelos	Morelos	GISAID_world
hCoV-19/Mexico/HID_InDRE_FB1015_E13313653254_S10815/2022	BA.1.15	2022-01-07	2022	Mexico	Hidalgo	Hidalgo	GISAID_world
hCoV-19/USA/OH-CDC-MMB13366794/2022	BA.1.1	2022-01-18	2022	USA	Ohio	Ohio	GISAID_world
hCoV-19/Australia/ACT2698/2022	BA.1.17	2022-01-06	2022	Australia	Australian Capital Territory	Australian Capital Territory	GISAID_world
hCoV-19/Australia/ACT2660/2022	BA.1.17	2022-01-09	2022	Australia	Australian Capital Territory	Australian Capital Territory	GISAID_world
hCoV-19/SriLanka/aicbu3780/2022	BA.1.1	2022-01-09	2022	Sri Lanka	Colombo	Colombo	GISAID_world
hCoV-19/Bermuda/WR-NYGC-DEC-6130-LSCW531/2021	BA.1	2021-11-12	2021	Bermuda	Warwick	Warwick	GISAID_world
hCoV-19/Bermuda/WR-NYGC-DEC-6142-TBKO909/2021	BA.1	2021-12-13	2021	Bermuda	Warwick	Warwick	GISAID_world
hCoV-19/USA/KS-KHEL-9928/2022	BA.1	2022-02-10	2022	USA	Kansas	Kansas	GISAID_world
hCoV-19/NewZealand/22CV0962/2022	BA.1.1.9	2022-01-27	2022	New Zealand	Midcentral	Midcentral	GISAID_world
hCoV-19/NewZealand/22CH0622/2022	BA.1	2022-01-24	2022	New Zealand	Canterbury	Canterbury	GISAID_world
hCoV-19/NewZealand/22CH0665/2022	BA.1.1.9	2022-01-28	2022	New Zealand	Nelson Marlborough	Nelson Marlborough	GISAID_world
hCoV-19/Sweden/SUS0008029/2022	BA.1	2022-01-04	2022	Sweden	Skane	Skane	GISAID_world
hCoV-19/USA/AS-H227813/2022	BA.1.1	2022-01-10	2022	USA	American Samoa	American Samoa	GISAID_world
hCoV-19/USA/MO-CDC-ASC210648641/2022	BA.1.15	2022-02-02	2022	USA	Missouri	Missouri	GISAID_world
hCoV-19/Mexico/SON_InDRE_FB6162_E26313999449_S11352/2022	BA.1	2022-01-13	2022	Mexico	Sonora	Sonora	GISAID_world
hCoV-19/Mexico/SIN_InDRE_FB7804_E25114473428_S11373/2022	BA.1.1	2022-01-20	2022	Mexico	Sinaloa	Sinaloa	GISAID_world
hCoV-19/Mexico/SLP_InDRE_FB5002_E24113981648_S11555/2022	BA.1.1	2022-01-13	2022	Mexico	San Luis Potosi	San Luis Potosi	GISAID_world
hCoV-19/Mexico/NAY_InDRE_FB4815_E18114073741_S11536/2022	BA.1	2022-01-14	2022	Mexico	Nayarit	Nayarit	GISAID_world
hCoV-19/Mexico/BCN_InDRE_FB6024_E02313916383_S11329/2022	BA.1.1	2022-01-12	2022	Mexico	Baja California	Baja California	GISAID_world
hCoV-19/France/PDL-IPP52710/2021	BA.1	2021-12-27	2021	France	Pays de la Loire	Pays de la Loire	GISAID_world
hCoV-19/Honduras/LNV490639-ICGES/2022	BA.1.1	2022-01-03	2022	Honduras	Honduras	Honduras	GISAID_world
hCoV-19/Luxembourg/LNS3230524/2021	BA.1.17	2021-12-29	2021	Luxembourg	Luxembourg	Luxembourg	GISAID_world
hCoV-19/SriLanka/aicbu4725/2022	BA.2	2022-02-10	2022	Sri Lanka	Western Province	Western Province	GISAID_world
hCoV-19/USA/WV-CDC-ASC210650053/2022	BA.1.1	2022-02-04	2022	USA	West Virginia	West Virginia	GISAID_world
hCoV-19/Singapore/1151/2022	BA.2	2022-01-22	2022	Singapore	Singapore	Singapore	GISAID_world
hCoV-19/Belgium/AZDelta-2202-24071/2022	BA.1	2022-01-18	2022	Belgium	Gent	Gent	GISAID_world
hCoV-19/Mexico/MOR_LANGEBIO_IMSS_5742/2022	BA.1	2022-01-24	2022	Mexico	Morelos	Morelos	GISAID_world
hCoV-19/Eswatini/N22779/2021	BA.1	2021-11-27	2021	Eswatini	Hhohho	Hhohho	GISAID_world
hCoV-19/Eswatini/N22796/2021	BA.1	2021-11-29	2021	Eswatini	Hhohho	Hhohho	GISAID_world
hCoV-19/Eswatini/N22771/2021	BA.1	2021-11-28	2021	Eswatini	Lubombo	Lubombo	GISAID_world
hCoV-19/Canada/SK-RRPL-307918/2021	BA.1.17	2021-12-29	2021	Canada	Saskatchewan	Saskatchewan	GISAID_world
hCoV-19/Colombia/PUT-IAVH-VG-15178/2022	BA.1.1	2022-01-20	2022	Colombia	Putumayo	Putumayo	GISAID_world
hCoV-19/SouthAfrica/NICD-N23881/2021	BA.1.17	2021-12-02	2021	South Africa	Mpumalanga	Mpumalanga	GISAID_world
hCoV-19/Romania/IS-1135/2022	BA.1	2022-01-09	2022	Romania	Iasi	Iasi	GISAID_world
hCoV-19/Australia/WA935/2022	BA.1.17	2022-01-08	2022	Australia	Western Australia	Western Australia	GISAID_world
hCoV-19/Nigeria/CV4816/2021	BA.1.1	2021-12-09	2021	Nigeria	Edo	Edo	GISAID_world
hCoV-19/Namibia/N25884/2021	BA.1	2021-12-15	2021	Namibia	Erongo	Erongo	GISAID_world
hCoV-19/Mexico/GUA_IBT_IMSS_5411/2021	BA.1.15	2021-12-29	2021	Mexico	Guanajuato	Guanajuato	GISAID_world
hCoV-19/Mexico/QUE_IBT_IMSS_5622/2022	BA.1.15	2022-01-05	2022	Mexico	Queretaro	Queretaro	GISAID_world
hCoV-19/USA/MD-HP24489-PIDBZBHZDB/2022	BA.1.1	2022-01-06	2022	USA	Maryland	Maryland	GISAID_world
hCoV-19/Estonia/RC0277688/2021	BA.1.1	2021-12-23	2021	Estonia	Estonia	Estonia	GISAID_world
hCoV-19/Mexico/HID_IBT_IMSS_5302/2021	BA.1	2021-12-26	2021	Mexico	Hidalgo	Hidalgo	GISAID_world
hCoV-19/Botswana/R66B87_BHP_927868/2021	BA.1	2021-12-30	2021	Botswana	Kgatleng District	Kgatleng District	GISAID_world
hCoV-19/Bulgaria/22BG-NC_014560_R25/2022	BA.1.10	2022-01-07	2022	Bulgaria	Blagoevgrad	Blagoevgrad	GISAID_world
hCoV-19/Namibia/N25887/2021	BA.1	2021-12-15	2021	Namibia	Erongo	Erongo	GISAID_world
hCoV-19/Jordan/Biolab0469/2022	BA.2.3	2022-01-06	2022	Jordan	Amman	Amman	GISAID_world
hCoV-19/NewZealand/21CH1034/2021	BA.1	2021-12-29	2021	New Zealand	Canterbury	Canterbury	GISAID_world
hCoV-19/NewZealand/22CH0307/2022	BA.1.1	2022-01-11	2022	New Zealand	Canterbury	Canterbury	GISAID_world
hCoV-19/USA/SC-CDC-LC0453463/2021	BA.1.1	2021-12-29	2021	USA	South Carolina	South Carolina	GISAID_world
hCoV-19/USA/DE-CDC-LC0454541/2021	BA.1.1	2021-12-30	2021	USA	Delaware	Delaware	GISAID_world
hCoV-19/Serbia/Smederevska_Palanka-419948_2101/2022	BA.1.1	2022-01-21	2022	Serbia	Smederevska Palanka	Smederevska Palanka	GISAID_world
hCoV-19/Serbia/Belgrade-419537_2101/2022	BA.1	2022-01-21	2022	Serbia	Belgrade	Belgrade	GISAID_world
hCoV-19/Bulgaria/22BG-NC_014467_R24/2022	BA.1.17	2022-01-05	2022	Bulgaria	Ruse	Ruse	GISAID_world
hCoV-19/Paraguay/326257/2021	BA.1.1	2021-12-22	2021	Paraguay	Asuncion	Asuncion	GISAID_world
hCoV-19/Paraguay/323697/2021	BA.1.1	2021-12-20	2021	Paraguay	Asuncion	Asuncion	GISAID_world
hCoV-19/Botswana/R62B76_BHP_AAC48864/2021	BA.1	2021-12-24	2021	Botswana	Ghanzi District	Ghanzi District	GISAID_world
hCoV-19/Botswana/R62B85_BHP_AAC48844/2021	BA.1	2021-12-21	2021	Botswana	Ghanzi District	Ghanzi District	GISAID_world
hCoV-19/Botswana/R63B49_BHP_121160783/2021	BA.1.1	2021-12-28	2021	Botswana	Southern East	Southern East	GISAID_world
hCoV-19/Cambodia/902544/2022	BA.1.1	2022-01-09	2022	Cambodia	Cambodia	Cambodia	GISAID_world
hCoV-19/SouthAfrica/NICD-N23337/2021	BA.1	2021-11-24	2021	South Africa	Gauteng	Gauteng	GISAID_world
hCoV-19/Chile/RM-198146/2021	BA.1.1	2021-12-26	2021	Chile	Region Metropolitana de Santiago	Region Metropolitana de Santiago	GISAID_world
hCoV-19/Guadeloupe/IPP03723/2022	BA.1	2022-01-10	2022	Guadeloupe	Basse-Terre	Basse-Terre	GISAID_world
hCoV-19/Brazil/ES-FIOCRUZ-66479/2021	BA.1	2021-12-25	2021	Brazil	Espirito Santo	Espirito Santo	GISAID_world
hCoV-19/Brazil/RJ-FIOCRUZ-66419/2021	BA.1	2021-12-29	2021	Brazil	Rio de Janeiro	Rio de Janeiro	GISAID_world
hCoV-19/CostaRica/INC-2660-728256/2022	BA.1.17	2022-01-05	2022	Costa Rica	Heredia	Heredia	GISAID_world
hCoV-19/Bulgaria/22BG-NC_015705_R26/2022	BA.1.1	2022-01-17	2022	Bulgaria	Ruse	Ruse	GISAID_world
hCoV-19/USA/SC-CDC-LC0495617/2022	BA.1.1	2022-01-18	2022	USA	South Carolina	South Carolina	GISAID_world
hCoV-19/USA/WV-CDC-LC0499085/2022	BA.1.1	2022-01-13	2022	USA	West Virginia	West Virginia	GISAID_world
hCoV-19/Australia/VIC32664/2021	BA.1.17	2021-12-27	2021	Australia	Victoria	Victoria	GISAID_world
hCoV-19/USA/WI-CDC-FG-235760/2021	BA.1.1	2021-12-28	2021	USA	Wisconsin	Wisconsin	GISAID_world
hCoV-19/Philippines/PH-RITM-808/2021	BA.2.3	2021-12-29	2021	Philippines	Calabarzon	Calabarzon	GISAID_world
hCoV-19/NewZealand/21CV3871/2021	BA.1.15	2021-12-30	2021	New Zealand	Wellington	Wellington	GISAID_world
hCoV-19/NewZealand/22MV0001/2021	BA.1.1	2021-12-30	2021	New Zealand	Auckland	Auckland	GISAID_world
hCoV-19/CostaRica/INC-2474-725049/2021	BA.1.1	2021-12-23	2021	Costa Rica	Costa Rica	Costa Rica	GISAID_world
hCoV-19/CostaRica/INC-2534-726216/2021	BA.1.1	2021-12-30	2021	Costa Rica	Heredia	Heredia	GISAID_world
hCoV-19/CostaRica/INC-2458-724802/2021	BA.1.15	2021-12-22	2021	Costa Rica	Heredia	Heredia	GISAID_world
hCoV-19/Pakistan/NIH-B33-S13/2022	BA.1.17	2022-01-03	2022	Pakistan	Islamabad Capital Territory	Islamabad Capital Territory	GISAID_world
hCoV-19/Chile/LI-197095/2021	BA.1.1	2021-12-21	2021	Chile	O'Higgins	O'Higgins	GISAID_world
hCoV-19/USA/WY-CDC-QDX32456597/2021	BA.1.1	2021-12-29	2021	USA	Wyoming	Wyoming	GISAID_world
hCoV-19/Netherlands/NB-MVD-CWGS2200264/2022	BA.1	2022-01-05	2022	Netherlands	North Brabant	North Brabant	GISAID_world
hCoV-19/Curacao/CW-RIVM-82561/2022	BA.1.15	2022-01-08	2022	Curacao	Curacao	Curacao	GISAID_world
hCoV-19/Curacao/CW-RIVM-82550/2022	BA.1.15	2022-01-05	2022	Curacao	Curacao	Curacao	GISAID_world
hCoV-19/Colombia/DC-UNIANDES-G033286/2021	BA.1.1	2021-12-22	2021	Colombia	Cundinamarca	Cundinamarca	GISAID_world
hCoV-19/Mexico/PUE-VE22-5440-LABOPAT/2022	BA.1.1	2022-01-09	2022	Mexico	Puebla	Puebla	GISAID_world
hCoV-19/USA/TX-CDC-QDX32302885/2021	BA.1.15	2021-12-20	2021	USA	Texas	Texas	GISAID_world
hCoV-19/Aruba/AW-RIVM-82609/2022	BA.1.1	2022-01-08	2022	Aruba	Aruba	Aruba	GISAID_world
hCoV-19/Aruba/AW-RIVM-82600/2022	BA.1.1	2022-01-08	2022	Aruba	Aruba	Aruba	GISAID_world
hCoV-19/Aruba/AW-RIVM-82603/2022	BA.1	2022-01-08	2022	Aruba	Aruba	Aruba	GISAID_world
hCoV-19/Bonaire/BQ-RIVM-82742/2022	BA.1.15	2022-01-04	2022	Bonaire	Bonaire	Bonaire	GISAID_world
hCoV-19/Bonaire/BQ-RIVM-82749/2022	BA.1.1	2022-01-05	2022	Bonaire	Bonaire	Bonaire	GISAID_world
hCoV-19/Zimbabwe/S_3115_B61/2021	BA.1.17	2021-12-15	2021	Zimbabwe	Harare	Harare	GISAID_world
hCoV-19/Aruba/AW-RIVM-82592/2022	BA.1.15	2022-01-08	2022	Aruba	Aruba	Aruba	GISAID_world
hCoV-19/Bonaire/BQ-RIVM-82764/2022	BA.1	2022-01-06	2022	Bonaire	Bonaire	Bonaire	GISAID_world
hCoV-19/Georgia/Tb-sNGS3057/2022	BA.1.1	2022-01-08	2022	Georgia	Tbilisi	Tbilisi	GISAID_world
hCoV-19/Colombia/VAC-INS-VG-11987/2021	BA.1.1	2021-12-28	2021	Colombia	Valle del Cauca	Valle del Cauca	GISAID_world
hCoV-19/Colombia/DC-LSPSDS-VG-41704/2021	BA.1.17	2021-12-31	2021	Colombia	Cundinamarca	Cundinamarca	GISAID_world
hCoV-19/HongKong/VM21048486/2021	BA.2.3	2021-12-30	2021	Hong Kong	Hong Kong	Hong Kong	GISAID_world
hCoV-19/USA/AL-CDC-ASC210584433/2022	BA.1.1	2022-01-12	2022	USA	Alabama	Alabama	GISAID_world
hCoV-19/USA/MA-CDCBI-CRSP_LRUAPBMULEOAQ54K/2022	BA.1.1	2022-01-04	2022	USA	Massachusetts	Massachusetts	GISAID_world
hCoV-19/USA/WA-PHL-012164/2021	BA.1.1	2021-12-28	2021	USA	Washington	Washington	GISAID_world
hCoV-19/Argentina/INEI117194/2022	BA.1.17	2022-01-03	2022	Argentina	Buenos Aires	Buenos Aires	GISAID_world
hCoV-19/Argentina/INEI117446/2022	BA.1	2022-01-04	2022	Argentina	Buenos Aires	Buenos Aires	GISAID_world
hCoV-19/Argentina/INEI117248/2021	BA.1.1	2021-12-19	2021	Argentina	Buenos Aires	Buenos Aires	GISAID_world
hCoV-19/Argentina/INEI116306/2021	BA.1.17	2021-12-26	2021	Argentina	Buenos Aires	Buenos Aires	GISAID_world
hCoV-19/Argentina/INEI117206/2021	BA.1.1	2021-12-28	2021	Argentina	Santa Fe	Santa Fe	GISAID_world
hCoV-19/SouthKorea/KDCA26119/2021	BA.1.1.5	2021-12-18	2021	South Korea	South Korea	South Korea	GISAID_world
hCoV-19/SouthKorea/KDCA26207/2021	BA.1	2021-12-30	2021	Egypt	Egypt	Egypt	GISAID_world
hCoV-19/USA/HI-CDC-LC0483069/2022	BA.1.1	2022-01-10	2022	USA	Hawaii	Hawaii	GISAID_world
hCoV-19/Peru/LIM-INS-11289/2021	BA.1.15	2021-12-19	2021	Peru	Lima	Lima	GISAID_world
hCoV-19/USA/UT-CDC-LC0456188/2021	BA.1.15	2021-12-27	2021	USA	Utah	Utah	GISAID_world
hCoV-19/USA/MO-CDC-ASC210573731/2021	BA.1.1	2021-12-29	2021	USA	Missouri	Missouri	GISAID_world
hCoV-19/Australia/NSW-ICPMR-19575/2022	BA.1.17	2022-01-03	2022	Australia	New South Wales	New South Wales	GISAID_world
hCoV-19/Ireland/LH-NVRL-S21IRL00604084/2021	BA.1.17	2021-12-28	2021	Ireland	Louth	Louth	GISAID_world
hCoV-19/Mexico/ROO-INMEGEN-52-120/2022	BA.1.1	2022-01-06	2022	Mexico	Quintana Roo	Quintana Roo	GISAID_world
hCoV-19/Mexico/OAX-INMEGEN-52-131/2022	BA.1.15	2022-01-10	2022	Mexico	Oaxaca	Oaxaca	GISAID_world
hCoV-19/Mexico/OAX-INMEGEN-52-135/2022	BA.1.15	2022-01-05	2022	Mexico	Oaxaca	Oaxaca	GISAID_world
hCoV-19/USA/IA-SHL-2005554/2022	BA.1.1	2022-01-10	2022	USA	Iowa	Iowa	GISAID_world
hCoV-19/Tanzania/JXCDC-09/2021	BA.1.1	2021-12-18	2021	Tanzania	Tanzania	Tanzania	GISAID_world
hCoV-19/Tanzania/JXCDC-10/2021	BA.1.1	2021-12-18	2021	Tanzania	Tanzania	Tanzania	GISAID_world
hCoV-19/Japan/PG-178309/2022	BA.1.1.2	2022-01-03	2022	Japan	Okinawa	Okinawa	GISAID_world
hCoV-19/Canada/BC-BCCDC-308302/2021	BA.1	2021-12-19	2021	Canada	British Columbia	British Columbia	GISAID_world
hCoV-19/Myanmar/DSMRC-066/2022	BA.2.3	2022-01-04	2022	Myanmar	Yangon	Yangon	GISAID_world
hCoV-19/Myanmar/DSMRC-067/2022	BA.1.1	2022-01-04	2022	Myanmar	Yangon	Yangon	GISAID_world
hCoV-19/Japan/PG-175421/2021	BA.1.1.2	2021-12-31	2021	Japan	Yamaguchi	Yamaguchi	GISAID_world
hCoV-19/Ecuador/NIC-INSPI-377795/2022	BA.1	2022-01-07	2022	Ecuador	Manabi	Manabi	GISAID_world
hCoV-19/Norway/OUS-19511/2022	BA.2	2022-01-11	2022	Norway	Oslo	Oslo	GISAID_world
hCoV-19/USA/AK-PHL16676/2021	BA.1.15	2021-12-26	2021	USA	Alaska	Alaska	GISAID_world
hCoV-19/Canada/NL-PHML-296845/2021	BA.1.1	2021-12-27	2021	Canada	Newfoundland and Labrador	Newfoundland and Labrador	GISAID_world
hCoV-19/AntiguaandBarbuda/114018/2021	BA.1.1	2021-12-26	2021	Antigua and Barbuda	Antigua and Barbuda	Antigua and Barbuda	GISAID_world
hCoV-19/Mexico/AGU_ISSEA-Lesp-5006-S11/2022	BA.1.1	2022-01-11	2022	Mexico	Aguascalientes	Aguascalientes	GISAID_world
hCoV-19/Australia/WA1023/2022	BA.1.1	2022-01-14	2022	Australia	Western Australia	Western Australia	GISAID_world
hCoV-19/CostaRica/INC-2805-735081/2022	BA.1.1	2022-01-11	2022	Costa Rica	Cartago CR	Cartago CR	GISAID_world
hCoV-19/CostaRica/INC-2823-736333/2022	BA.1.1	2022-01-20	2022	Costa Rica	Costa Rica	Costa Rica	GISAID_world
hCoV-19/USA/AZ-ASPHL-0133/2022	BA.1	2022-01-03	2022	USA	Arizona	Arizona	GISAID_world
hCoV-19/Denmark/DCGC-336125/2022	BA.2	2022-01-18	2022	Denmark	Hovedstaden	Hovedstaden	GISAID_world
hCoV-19/Andorra/AND-244_213641396801_COV-GC/2021	BA.1.15	2021-12-26	2021	Andorra	Andorra	Andorra	GISAID_world
hCoV-19/Sweden/6232872076/2022	BA.2	2022-01-20	2022	Sweden	Sormland	Sormland	GISAID_world
hCoV-19/Switzerland/un-HUG-36931982/2022	BA.1.1.1	2022-01-25	2022	Switzerland	Switzerland	Switzerland	GISAID_world
hCoV-19/USA/TX-HMH-MCoV-72054/2021	BA.1.15	2021-12-21	2021	USA	Texas	Texas	GISAID_world
hCoV-19/Iraq/CPHL-180122-22/2022	BA.1.1	2022-01-14	2022	Iraq	Baghdad	Baghdad	GISAID_world
hCoV-19/Mexico/CMX-INMEGEN-51-90/2022	BA.1.15	2022-01-11	2022	Mexico	Mexico City	Mexico City	GISAID_world
hCoV-19/Norway/40/2022	BA.1	2022-01-01	2022	Norway	Vestfold Og Telemark	Vestfold Og Telemark	GISAID_world
hCoV-19/SaudiArabia/KFSHRC_0111Y/2021	BA.1.1	2021-12-16	2021	Saudi Arabia	Riyadh	Riyadh	GISAID_world
hCoV-19/Argentina/INEI118199/2022	BA.1	2022-01-17	2022	Argentina	Buenos Aires	Buenos Aires	GISAID_world
hCoV-19/Argentina/INEI118134/2022	BA.1.1	2022-01-17	2022	Argentina	Buenos Aires	Buenos Aires	GISAID_world
hCoV-19/France/NOR-HMN-22012250130/2022	BA.1.1	2022-01-17	2022	France	Normandie	Normandie	GISAID_world
hCoV-19/Mexico/CHP-INMEGEN-54-278/2022	BA.1.1	2022-01-23	2022	Mexico	Chiapas	Chiapas	GISAID_world
hCoV-19/Austria/LB-R00057-S049/2022	BA.2	2022-01-24	2022	Austria	Vienna	Vienna	GISAID_world
hCoV-19/Austria/LB-R00057-S112/2022	BA.2	2022-01-25	2022	Austria	Vienna	Vienna	GISAID_world
hCoV-19/Maldives/MAV108646/2022	BA.1.1	2022-01-19	2022	Maldives	Dh. Bandidhoo	Dh. Bandidhoo	GISAID_world
hCoV-19/Australia/NSW-ICPMR-19962/2022	BA.1.17	2022-01-27	2022	Australia	New South Wales	New South Wales	GISAID_world
hCoV-19/Taiwan/TSGH-49/2021	BA.1	2021-12-21	2021	Taiwan	Taiwan	Taiwan	GISAID_world
hCoV-19/Netherlands/ZH-RIVM-83875/2022	BA.1.1	2022-01-13	2022	Netherlands	South Holland	South Holland	GISAID_world
hCoV-19/Curacao/CW-RIVM-85364/2022	BA.1.1	2022-01-21	2022	Curacao	Curacao	Curacao	GISAID_world
hCoV-19/Bonaire/BQ-RIVM-85186/2022	BA.1.1	2022-01-18	2022	Bonaire	Bonaire	Bonaire	GISAID_world
hCoV-19/Curacao/CW-RIVM-84060/2022	BA.1	2022-01-12	2022	Curacao	Curacao	Curacao	GISAID_world
hCoV-19/CostaRica/INC-2783-734509/2022	BA.1.15	2022-01-16	2022	Costa Rica	San Jose	San Jose	GISAID_world
hCoV-19/CostaRica/INC-2758-731140/2022	BA.1.17	2022-01-08	2022	Costa Rica	Guanacaste	Guanacaste	GISAID_world
hCoV-19/CostaRica/INC-2789-734526/2022	BA.1.1	2022-01-17	2022	Costa Rica	Costa Rica	Costa Rica	GISAID_world
hCoV-19/Portugal/PT25757/2022	BA.1.17	2022-01-10	2022	Portugal	Portugal	Portugal	GISAID_world
hCoV-19/TrinidadandTobago/120274/2022	BA.1.1	2022-01-08	2022	Trinidad and Tobago	Trinidad and Tobago	Trinidad and Tobago	GISAID_world
hCoV-19/USA/ME-HETL-J11803/2022	BA.1	2022-01-11	2022	USA	Maine	Maine	GISAID_world
hCoV-19/Guadeloupe/CERBAHC-12335847/2021	BA.1.1.1	2021-12-27	2021	Guadeloupe	Guadeloupe	Guadeloupe	GISAID_world
hCoV-19/Oman/5221029/2022	BA.1.1	2022-01-02	2022	Oman	Muscat	Muscat	GISAID_world
hCoV-19/Oman/5221024/2022	BA.2	2022-01-03	2022	Oman	Muscat	Muscat	GISAID_world
hCoV-19/England/LSPA-349BED6/2022	BA.1.17	2022-01-26	2022	United Kingdom	England	England	GISAID_world
hCoV-19/Guinea/LFHVG-G0509/2021	BA.1.16	2021-12-30	2021	Guinea	Conakry	Conakry	GISAID_world
hCoV-19/Guinea/LFHVG-G0508/2021	BA.1.15.1	2021-12-30	2021	Guinea	Conakry	Conakry	GISAID_world
hCoV-19/Mexico/BCS_IBT_IMSS_6129/2022	BA.1	2022-01-10	2022	Mexico	Baja California Sur	Baja California Sur	GISAID_world
hCoV-19/Mexico/VER_LANGEBIO_IMSS_5432/2022	BA.1.1	2022-01-17	2022	Mexico	Veracruz	Veracruz	GISAID_world
hCoV-19/Mexico/CAM_LANGEBIO_IMSS_5307/2022	BA.1.1	2022-01-21	2022	Mexico	Campeche	Campeche	GISAID_world
hCoV-19/Mexico/PUE_LANGEBIO_IMSS_5344/2022	BA.1.1	2022-01-17	2022	Mexico	Puebla	Puebla	GISAID_world
hCoV-19/DRC/INRB-RDC-793/2021	BA.1	2021-12-03	2021	Democratic Republic of the Congo	Kinshasa	Kinshasa	GISAID_world
hCoV-19/DRC/INRB-RDC-791/2021	BA.1.1	2021-10-26	2021	Democratic Republic of the Congo	Kinshasa	Kinshasa	GISAID_world
hCoV-19/CostaRica/INC-3012-741255/2022	BA.1.1	2022-02-03	2022	Costa Rica	Costa Rica	Costa Rica	GISAID_world
hCoV-19/CostaRica/INC-3013-741256/2022	BA.1.1	2022-02-03	2022	Costa Rica	San Jose	San Jose	GISAID_world
hCoV-19/Australia/VIC37718/2022	BA.1.17.1	2022-01-17	2022	Australia	Victoria	Victoria	GISAID_world
hCoV-19/Paraguay/367482/2022	BA.1.1	2022-01-10	2022	Paraguay	Asuncion	Asuncion	GISAID_world
hCoV-19/Paraguay/410369/2022	BA.1.1	2022-01-31	2022	Paraguay	Central Paraguay	Central Paraguay	GISAID_world
hCoV-19/Paraguay/410443/2022	BA.1.15	2022-01-31	2022	Paraguay	Central Paraguay	Central Paraguay	GISAID_world
hCoV-19/Paraguay/410465/2022	BA.1.1	2022-02-01	2022	Paraguay	Central Paraguay	Central Paraguay	GISAID_world
hCoV-19/Paraguay/410504/2022	BA.1.1	2022-02-01	2022	Paraguay	Central Paraguay	Central Paraguay	GISAID_world
hCoV-19/Paraguay/410479/2022	BA.1.1	2022-02-01	2022	Paraguay	Ferndando de la Mora	Ferndando de la Mora	GISAID_world
hCoV-19/Paraguay/410474/2022	BA.1.1	2022-02-01	2022	Paraguay	Asuncion	Asuncion	GISAID_world
hCoV-19/Paraguay/410500/2022	BA.1.1	2022-02-01	2022	Paraguay	Central Paraguay	Central Paraguay	GISAID_world
hCoV-19/Australia/VIC37768/2022	BA.1.17	2022-01-17	2022	Australia	Victoria	Victoria	GISAID_world
hCoV-19/Brazil/RJ-LNN07800/2021	BA.1.1	2021-12-28	2021	Brazil	Rio de Janeiro	Rio de Janeiro	GISAID_world
hCoV-19/SouthAfrica/NICD-N34325/2022	BA.2	2022-02-03	2022	South Africa	Gauteng	Gauteng	GISAID_world
hCoV-19/USA/GA-CDC-MMB12563377/2021	BA.1.1	2021-12-29	2021	USA	Georgia	Georgia	GISAID_world
hCoV-19/Mexico/TAM-INMEGEN-53-179/2022	BA.1.15	2022-01-12	2022	Mexico	Tamaulipas	Tamaulipas	GISAID_world
hCoV-19/Philippines/PH-PGC-104094/2022	BA.2.3	2022-01-05	2022	Philippines	Manila	Manila	GISAID_world
hCoV-19/CzechRepublic/UMTM390620/2021	BA.1	2021-12-27	2021	Czech Republic	ZlГ­n Region	ZlГ­n Region	GISAID_world
hCoV-19/Philippines/PH-PGC-104085/2022	BA.2.3	2022-01-04	2022	Philippines	Manila	Manila	GISAID_world
hCoV-19/USA/OK-CDC-LC0488052/2022	BA.1.15	2022-01-14	2022	USA	Oklahoma	Oklahoma	GISAID_world
hCoV-19/USA/MO-CDC-LC0489685/2022	BA.1.15	2022-01-14	2022	USA	Missouri	Missouri	GISAID_world
hCoV-19/Canada/ON-PHL-22-04188/2021	BA.1	2021-12-29	2021	Canada	Ontario	Ontario	GISAID_world
hCoV-19/Italy/ABR-IZSGC-2022TE907/2021	BA.1.17	2021-12-24	2021	Italy	Abruzzo	Abruzzo	GISAID_world
hCoV-19/USA/IA-SHL-2022399/2022	BA.1	2022-01-18	2022	USA	Iowa	Iowa	GISAID_world
hCoV-19/Bangladesh/icddrb-GSB03-186/2022	BA.2	2022-01-12	2022	Bangladesh	Dhaka	Dhaka	GISAID_world
hCoV-19/Colombia/VAC-INS-VG-13398/2022	BA.1.1	2022-01-03	2022	Colombia	Valle del Cauca	Valle del Cauca	GISAID_world
hCoV-19/USA/GA-CDC-STM-SXDCD2JUK/2022	BA.1.15	2022-01-15	2022	USA	Georgia	Georgia	GISAID_world
hCoV-19/Eswatini/N28421/2021	BA.1	2021-12-04	2021	Eswatini	Hhohho	Hhohho	GISAID_world
hCoV-19/Spain/CT-HUGTiPM074SV9B9/2022	BA.1.14	2022-01-21	2022	Spain	Catalunya	Catalunya	GISAID_world
hCoV-19/USA/VA-CDC-QDX32791434/2022	BA.1	2022-01-07	2022	USA	Virginia	Virginia	GISAID_world
hCoV-19/Eswatini/N28514/2021	BA.1.1	2021-12-09	2021	Eswatini	Lubombo	Lubombo	GISAID_world
hCoV-19/USA/NJ-CDC-QDX32887052/2022	BA.1.1	2022-01-10	2022	USA	New Jersey	New Jersey	GISAID_world
hCoV-19/Kosovo/CO-00634-XXK000_03_01_Prolab/2021	BA.1	2021-12-29	2021	Kosovo	Pristina	Pristina	GISAID_world
hCoV-19/Cambodia/VIR22-003268/2022	BA.2.3	2022-02-01	2022	Cambodia	Cambodia	Cambodia	GISAID_world
hCoV-19/Croatia/24227/2022	BA.1.1.10	2022-01-10	2022	Croatia	Zagreb	Zagreb	GISAID_world
hCoV-19/Finland/THL-202200550/2022	BA.1.1	2022-01-08	2022	Finland	Finland	Finland	GISAID_world
hCoV-19/Denmark/DCGC-356201/2022	BA.2	2022-01-13	2022	Denmark	Hovedstaden	Hovedstaden	GISAID_world
hCoV-19/Australia/WA1194/2022	BA.1.17	2022-01-29	2022	Australia	Western Australia	Western Australia	GISAID_world
hCoV-19/USA/CA-SEARCH-115845/2021	BA.1.15	2021-12-29	2021	USA	California	California	GISAID_world
hCoV-19/Belgium/Jessa_11-2205-000995LKO/2022	BA.1.1.11	2022-01-31	2022	Belgium	Limburg BE	Limburg BE	GISAID_world
hCoV-19/Chile/LI-17158/2022	BA.1.1	2022-01-24	2022	Chile	O'Higgins	O'Higgins	GISAID_world
hCoV-19/Chile/CO-17766/2022	BA.1.1	2022-01-25	2022	Chile	Coquimbo	Coquimbo	GISAID_world
hCoV-19/Luxembourg/LNS2880709/2022	BA.1.1	2022-01-18	2022	Luxembourg	Luxembourg	Luxembourg	GISAID_world
hCoV-19/Switzerland/AG-SRO-500007_6962/2022	BA.1.1.3	2022-02-01	2022	Switzerland	Aargau	Aargau	GISAID_world
hCoV-19/Hungary/mbl_02087/2022	BA.1.17	2022-01-14	2022	Hungary	CsongrГЎd County	CsongrГЎd County	GISAID_world
hCoV-19/Hungary/mbl_01419/2022	BA.1	2022-01-10	2022	Hungary	BГЎcs-Kiskun County	BГЎcs-Kiskun County	GISAID_world
hCoV-19/Hungary/mbl_01254/2022	BA.1.1	2022-01-10	2022	Hungary	Pest County	Pest County	GISAID_world
hCoV-19/Rwanda/NRLNAT4325/2021	BA.1	2021-12-26	2021	Rwanda	Kigali	Kigali	GISAID_world
hCoV-19/Rwanda/NRLNAT4299/2022	BA.1.1	2022-01-03	2022	Rwanda	Kigali	Kigali	GISAID_world
hCoV-19/Rwanda/NRLNAT4312/2021	BA.1	2021-12-26	2021	Rwanda	Kigali	Kigali	GISAID_world
hCoV-19/Rwanda/NRLNAT4316/2021	BA.1.13	2021-12-21	2021	Rwanda	Kigali	Kigali	GISAID_world
hCoV-19/Rwanda/NRLNAT4271/2021	BA.1.1	2021-12-29	2021	Rwanda	Kigali	Kigali	GISAID_world
hCoV-19/Rwanda/NRLNAT4321/2022	BA.1	2022-01-07	2022	Rwanda	Kigali	Kigali	GISAID_world
hCoV-19/Rwanda/NRLNAT4333/2022	BA.1.17	2022-01-20	2022	Rwanda	Kigali	Kigali	GISAID_world
hCoV-19/Rwanda/NRLNAT4306/2022	BA.1	2022-01-08	2022	Rwanda	Kigali	Kigali	GISAID_world
hCoV-19/Poland/PZH-GUM-12082/2022	BA.1	2022-01-24	2022	Poland	Podkarpackie	Podkarpackie	GISAID_world
hCoV-19/Peru/ARE-UNSA-1270/2022	BA.1.1	2022-01-14	2022	Peru	Arequipa	Arequipa	GISAID_world
hCoV-19/Germany/BY-RKI-I-520459/2022	BA.1.1.1	2022-02-02	2022	Germany	Bavaria	Bavaria	GISAID_world
hCoV-19/Qatar/QA.QU.18.38.D4/2022	BA.2	2022-01-18	2022	Qatar	Doha	Doha	GISAID_world
hCoV-19/Qatar/QA.QU.18.36.F1/2022	BA.2	2022-01-12	2022	Qatar	Doha	Doha	GISAID_world
hCoV-19/Maldives/MAV98338/2022	BA.1.1	2022-01-08	2022	Maldives	Sh. Foakaidhoo	Sh. Foakaidhoo	GISAID_world
hCoV-19/Kenya/ILRI_COVM02667/2022	BA.1.1	2022-01-15	2022	Kenya	Bungoma	Bungoma	GISAID_world
hCoV-19/Kenya/ILRI_COVM02671/2022	BA.1.1	2022-01-03	2022	Kenya	Bungoma	Bungoma	GISAID_world
hCoV-19/Turkey/HSGM-G947/2022	BA.1	2022-02-08	2022	Turkey	Turkey	Turkey	GISAID_world
hCoV-19/Australia/WA1432/2022	BA.1.17	2022-02-16	2022	Australia	Western Australia	Western Australia	GISAID_world
hCoV-19/Ireland/D-NVRL-G22IRL05155/2021	BA.1	2021-12-24	2021	Ireland	Dublin	Dublin	GISAID_world
hCoV-19/Australia/NSW-ICPMR-20611/2022	BA.1.1	2022-02-09	2022	Australia	New South Wales	New South Wales	GISAID_world
hCoV-19/Australia/NSW-ICPMR-20721/2022	BA.1.17	2022-02-13	2022	Australia	New South Wales	New South Wales	GISAID_world
hCoV-19/Sweden/SUS0009642/2022	BA.2	2022-02-07	2022	Sweden	Skane	Skane	GISAID_world
hCoV-19/USA/WI-CDC-ASC210604399/2022	BA.1.1	2022-01-20	2022	USA	Wisconsin	Wisconsin	GISAID_world
hCoV-19/USA/KY-CDC-ASC210539753/2022	BA.1.1	2022-01-22	2022	USA	Kentucky	Kentucky	GISAID_world
hCoV-19/USA/GA-CDC-ASC210643410/2022	BA.1.1	2022-01-23	2022	USA	Georgia	Georgia	GISAID_world
hCoV-19/Turkey/HSGM-G1326/2022	BA.1	2022-02-14	2022	Turkey	Turkey	Turkey	GISAID_world
hCoV-19/Portugal/PT27932/2022	BA.1.1	2022-02-03	2022	Portugal	Portugal	Portugal	GISAID_world
hCoV-19/Andorra/AND-254_220331370901_COV-GC/2022	BA.1.15	2022-02-01	2022	Andorra	Andorra	Andorra	GISAID_world
hCoV-19/Norway/Ahus-3153/2022	BA.2	2022-02-09	2022	Norway	Viken	Viken	GISAID_world
hCoV-19/Portugal/PT28039/2022	BA.1	2022-02-08	2022	Portugal	Portugal	Portugal	GISAID_world
hCoV-19/Portugal/PT27888/2022	BA.1	2022-02-07	2022	Portugal	Portugal	Portugal	GISAID_world
hCoV-19/Spain/IB-HUSE-04182/2022	BA.1	2022-02-10	2022	Spain	Balear Islands	Balear Islands	GISAID_world
hCoV-19/Indonesia/JB-GS-WJHL-ITB-L75792/2022	BA.2	2022-02-08	2022	Indonesia	West Java	West Java	GISAID_world
hCoV-19/Syria/Northwest-0118/2022	BA.1.1	2022-01-12	2022	Syria	Aleppo	Aleppo	GISAID_world
hCoV-19/Finland/THL-202206041/2022	BA.1.1	2022-02-01	2022	Finland	Finland	Finland	GISAID_world
hCoV-19/Greece/10176/2022	BA.1.1.13	2022-02-04	2022	Greece	North Aegean	North Aegean	GISAID_world
hCoV-19/Greece/328159/2022	BA.1.1	2022-01-23	2022	Greece	Western Greece	Western Greece	GISAID_world
hCoV-19/Greece/328300/2022	BA.1	2022-01-24	2022	Greece	Western Greece	Western Greece	GISAID_world
hCoV-19/Greece/9723/2022	BA.1	2022-02-03	2022	Greece	Attica	Attica	GISAID_world
hCoV-19/Greece/10058/2022	BA.1.1	2022-02-03	2022	Greece	Attica	Attica	GISAID_world
hCoV-19/Guadeloupe/CERBAHC-02150489/2022	BA.1.1	2022-02-07	2022	Guadeloupe	Guadeloupe	Guadeloupe	GISAID_world
hCoV-19/Australia/QLD4180/2021	BA.1.17	2021-12-23	2021	Australia	Queensland	Queensland	GISAID_world
hCoV-19/Zambia/CHAZ-CHS1571/2022	BA.2	2022-01-20	2022	Zambia	Eastern Zambia	Eastern Zambia	GISAID_world
hCoV-19/Zambia/CHAZ-CHS1648/2022	BA.1.14	2022-01-14	2022	Zambia	Eastern Zambia	Eastern Zambia	GISAID_world
hCoV-19/Zambia/CHAZ-CHS1640/2022	BA.2	2022-01-20	2022	Zambia	Eastern Zambia	Eastern Zambia	GISAID_world
hCoV-19/Finland/THL-202206039/2022	BA.1.1	2022-02-01	2022	Finland	Finland	Finland	GISAID_world
hCoV-19/HongKong/VM21048489/2021	BA.2.3	2021-12-30	2021	Hong Kong	Hong Kong	Hong Kong	GISAID_world
hCoV-19/England/LSPA-3500A13/2022	BA.1	2022-01-30	2022	United Kingdom	England	England	GISAID_world
hCoV-19/HongKong/CM22000271/2022	BA.1.1	2022-02-02	2022	Hong Kong	Hong Kong	Hong Kong	GISAID_world
hCoV-19/NewZealand/22CV1281/2022	BA.1.1.9	2022-01-29	2022	New Zealand	Taranaki	Taranaki	GISAID_world
hCoV-19/USA/IL-RIPHL_90157_G/2022	BA.1	2022-01-07	2022	USA	Illinois	Illinois	GISAID_world
hCoV-19/NewZealand/22CV0932/2022	BA.1.17	2022-01-25	2022	New Zealand	Waikato	Waikato	GISAID_world
hCoV-19/France/IDF-HMN-22012260110/2022	BA.1	2022-01-10	2022	France	Ile de France	Ile de France	GISAID_world
hCoV-19/USA/OR-CDC-QDX33118462/2022	BA.1.1	2022-01-22	2022	USA	Oregon	Oregon	GISAID_world
hCoV-19/Mexico/SIN_CIAD-MZT_S8657/2022	BA.1.1	2022-01-17	2022	Mexico	Sinaloa	Sinaloa	GISAID_world
hCoV-19/Mexico/AGU-ISSEA-Lesp-13847-S18/2022	BA.1.1	2022-02-10	2022	Mexico	Aguascalientes	Aguascalientes	GISAID_world
hCoV-19/U.S.VirginIslands/VI-CDC-2-5489026/2022	BA.1.1	2022-01-06	2022	USA	Virgin Islands	Virgin Islands	GISAID_world
hCoV-19/Finland/THL-202202621/2022	BA.1.1	2022-01-09	2022	Finland	Finland	Finland	GISAID_world
hCoV-19/SouthAfrica/NICD-N29060/2021	BA.1	2021-12-13	2021	South Africa	Eastern Cape	Eastern Cape	GISAID_world
hCoV-19/SouthAfrica/NICD-N32509/2021	BA.1	2021-12-31	2021	South Africa	Eastern Cape	Eastern Cape	GISAID_world
hCoV-19/NewZealand/22CH0840/2022	BA.1.17	2022-02-05	2022	New Zealand	South Canterbury	South Canterbury	GISAID_world
hCoV-19/Guadeloupe/IPP05403/2022	BA.1	2022-01-10	2022	Guadeloupe	Pointe-A-Pitre	Pointe-A-Pitre	GISAID_world
hCoV-19/Finland/THL-202206173/2022	BA.1.1	2022-02-01	2022	Finland	Finland	Finland	GISAID_world
hCoV-19/Venezuela/Mir176/2022	BA.1.1	2022-02-01	2022	Venezuela	Miranda	Miranda	GISAID_world
hCoV-19/Lithuania/LTU000_INMEDICA_1045618/2022	BA.1	2022-01-01	2022	Lithuania	Vilniaus Apskritis	Vilniaus Apskritis	GISAID_world
hCoV-19/Lithuania/LTU000_RSL_COV108722/2021	BA.1	2021-12-29	2021	Lithuania	Siauliu Apskritis	Siauliu Apskritis	GISAID_world
hCoV-19/Germany/BE-ChVir-LB-220218-4611/2022	BA.2	2022-02-09	2022	Germany	Berlin	Berlin	GISAID_world
hCoV-19/Italy/CAM-TIGEM-IZSM-COLLI-26377/2022	BA.1.1	2022-02-01	2022	Italy	Campania	Campania	GISAID_world
hCoV-19/Argentina/PAIS-G0869/2022	BA.1.15	2022-02-01	2022	Argentina	Cordoba AR	Cordoba AR	GISAID_world
hCoV-19/Argentina/PAIS-G0878/2022	BA.1.1	2022-02-02	2022	Argentina	Cordoba AR	Cordoba AR	GISAID_world
hCoV-19/Argentina/PAIS-G0882/2022	BA.1.1	2022-02-02	2022	Argentina	Cordoba AR	Cordoba AR	GISAID_world
hCoV-19/CzechRepublic/NAT-22-17250/2022	BA.1.1	2022-02-13	2022	Czech Republic	Prague	Prague	GISAID_world
hCoV-19/Australia/SA117850/2022	BA.1.1	2022-02-10	2022	Australia	South Australia	South Australia	GISAID_world
hCoV-19/Australia/SA117854/2022	BA.1.17.1	2022-02-10	2022	Australia	South Australia	South Australia	GISAID_world
hCoV-19/USA/CO-CDPHE-2102907061/2022	BA.1.1	2022-02-09	2022	USA	Colorado	Colorado	GISAID_world
hCoV-19/Peru/LIM-UPCH-2879/2022	BA.1.1	2022-02-12	2022	Peru	Lima	Lima	GISAID_world
hCoV-19/Macedonia/6091/2022	BA.1.1	2022-01-31	2022	North Macedonia	Tetovo	Tetovo	GISAID_world
hCoV-19/Macedonia/6199/2022	BA.1.1	2022-02-01	2022	North Macedonia	Skopje	Skopje	GISAID_world
hCoV-19/Macedonia/7327/2022	BA.1.17	2022-02-06	2022	North Macedonia	Tetovo	Tetovo	GISAID_world
hCoV-19/Macedonia/6299/2022	BA.1.1.11	2022-02-01	2022	North Macedonia	Tetovo	Tetovo	GISAID_world
hCoV-19/Macedonia/5856/2022	BA.1.1	2022-01-31	2022	North Macedonia	Skopje	Skopje	GISAID_world
hCoV-19/Australia/QLD30907/2022	BA.1.17	2022-01-03	2022	Australia	Queensland	Queensland	GISAID_world
hCoV-19/Australia/QLD38892/2022	BA.1.17	2022-01-18	2022	Australia	Queensland	Queensland	GISAID_world
hCoV-19/Australia/QLD33679/2022	BA.1.17	2022-01-07	2022	Australia	Queensland	Queensland	GISAID_world
hCoV-19/Australia/WA1461/2022	BA.1.17	2022-02-18	2022	Australia	Western Australia	Western Australia	GISAID_world
hCoV-19/France/ARA-CHUGA-2020187512/2022	BA.1	2022-02-08	2022	France	Auvergne-RhГґne-Alpes	Auvergne-RhГґne-Alpes	GISAID_world
hCoV-19/Belgium/AZDelta-2207-08562/2022	BA.1.1.1	2022-02-18	2022	Belgium	Roeselare	Roeselare	GISAID_world
hCoV-19/USA/NV-CDC-LC0536501/2022	BA.1.1	2022-02-07	2022	USA	Nevada	Nevada	GISAID_world
hCoV-19/USA/AL-CDC-LC0532502/2022	BA.1.1	2022-02-08	2022	USA	Alabama	Alabama	GISAID_world
hCoV-19/USA/MO-CDC-LC0535375/2022	BA.2.3	2022-02-08	2022	USA	Missouri	Missouri	GISAID_world
hCoV-19/USA/DC-CDC-LC0531775/2022	BA.1	2022-02-09	2022	USA	Washington DC	Washington DC	GISAID_world
hCoV-19/USA/NM-CDC-LC0537936/2022	BA.1.1	2022-02-10	2022	USA	New Mexico	New Mexico	GISAID_world
hCoV-19/USA/AK-CDC-LC0538103/2022	BA.1.1	2022-02-12	2022	USA	Alaska	Alaska	GISAID_world
hCoV-19/USA/WI-CDC-ASC210699518/2022	BA.1.1	2022-02-10	2022	USA	Wisconsin	Wisconsin	GISAID_world
hCoV-19/Switzerland/BL-ETHZ-36233249/2022	BA.1.1.1	2022-02-07	2022	Switzerland	Basel-Land	Basel-Land	GISAID_world
hCoV-19/USA/NM-CDC-IBX314526322763/2022	BA.1.1	2022-02-10	2022	USA	New Mexico	New Mexico	GISAID_world
hCoV-19/Japan/RB22-001-64/2022	BA.1.1.2	2022-02-01	2022	Japan	Tokyo	Tokyo	GISAID_world
hCoV-19/Japan/RB22-001-70/2022	BA.1.1.2	2022-02-10	2022	Japan	Kanagawa	Kanagawa	GISAID_world
hCoV-19/Moldova/Nr-7826/2022	BA.1.1	2022-01-27	2022	Moldova	Chisinau	Chisinau	GISAID_world
hCoV-19/Moldova/Nr-10380/2022	BA.1.1	2022-02-01	2022	Moldova	Chisinau	Chisinau	GISAID_world
hCoV-19/Moldova/Nr-12177/2022	BA.1.17	2022-02-04	2022	Moldova	Chisinau	Chisinau	GISAID_world
hCoV-19/Moldova/Nr-16816/2022	BA.2	2022-02-21	2022	Moldova	Chisinau	Chisinau	GISAID_world
hCoV-19/Italy/SIC-CQRC-22018139/2022	BA.2	2022-02-12	2022	Italy	Sicily	Sicily	GISAID_world
hCoV-19/Belize/8734379-ICGES/2021	BA.1.1	2021-12-28	2021	Belize	Belize	Belize	GISAID_world
hCoV-19/Belize/8734304-ICGES/2021	BA.1.1	2021-12-28	2021	Belize	Belize	Belize	GISAID_world
hCoV-19/Belize/8735198-ICGES/2022	BA.1	2022-01-01	2022	Belize	Belize	Belize	GISAID_world
hCoV-19/Australia/QLD0x00C6A1/2022	BA.1.17	2022-02-01	2022	Australia	Queensland	Queensland	GISAID_world
hCoV-19/Australia/QLD0x00C5A7/2022	BA.1.17	2022-02-06	2022	Australia	Queensland	Queensland	GISAID_world
hCoV-19/Australia/QLD0x00C71D/2022	BA.1.17	2022-02-11	2022	Australia	Queensland	Queensland	GISAID_world
hCoV-19/India/KA-CBR-1402PRED015/2022	BA.2	2022-02-10	2022	India	Karnataka	Karnataka	GISAID_world
hCoV-19/Guinea/IPG-25886/2021	BA.1.15	2021-12-30	2021	Guinea	Conakry	Conakry	GISAID_world
hCoV-19/Guinea/IPG-26010/2022	BA.1	2022-01-05	2022	Guinea	Conakry	Conakry	GISAID_world
hCoV-19/Cambodia/g0215171/2022	BA.2	2022-02-15	2022	Cambodia	Cambodia	Cambodia	GISAID_world
hCoV-19/Pakistan/NIH-B36-S11/2022	BA.2	2022-02-09	2022	Pakistan	Islamabad Capital Territory	Islamabad Capital Territory	GISAID_world
hCoV-19/Pakistan/NIH-B36-S13/2022	BA.2	2022-02-09	2022	Pakistan	Islamabad Capital Territory	Islamabad Capital Territory	GISAID_world
hCoV-19/Lithuania/LTU000_RSL_11594807/2022	BA.1	2022-02-03	2022	Lithuania	Siauliu Apskritis	Siauliu Apskritis	GISAID_world
hCoV-19/Lithuania/LTU000_INMEDICA_1168718/2022	BA.2	2022-02-03	2022	Lithuania	Vilniaus Apskritis	Vilniaus Apskritis	GISAID_world
hCoV-19/Thailand/CONI-2089/2022	BA.1.1	2022-02-02	2022	Thailand	Bangkok	Bangkok	GISAID_world
hCoV-19/USA/CO-CDC-MMB14081540/2022	BA.1.1	2022-02-01	2022	USA	Colorado	Colorado	GISAID_world
hCoV-19/Canada/AB-ABPHL-53321/2022	BA.1	2022-02-02	2022	Canada	Alberta	Alberta	GISAID_world
hCoV-19/USA/NE-NPHL22-12575/2022	BA.1.15	2022-02-21	2022	USA	Nebraska	Nebraska	GISAID_world
hCoV-19/USA/DC-CDC-QDX33632485/2022	BA.1.1	2022-02-04	2022	USA	Washington DC	Washington DC	GISAID_world
hCoV-19/Mexico/TAB-INMEGEN-59-230/2022	BA.1	2022-02-13	2022	Mexico	Tabasco	Tabasco	GISAID_world
hCoV-19/USA/NJ-CDC-ASC210697526/2022	BA.1.1.16	2022-02-08	2022	USA	New Jersey	New Jersey	GISAID_world
hCoV-19/USA/AR-CDC-ASC210548487/2022	BA.1.1	2022-02-08	2022	USA	Arkansas	Arkansas	GISAID_world
hCoV-19/USA/LA-CDC-ASC210700678/2022	BA.1.1	2022-02-09	2022	USA	Louisiana	Louisiana	GISAID_world
hCoV-19/Ghana/WACCBIP-GS2054/2021	BA.1	2021-12-08	2021	Ghana	Greater Accra	Greater Accra	GISAID_world
hCoV-19/Ghana/WACCBIP-GS2194/2021	BA.1	2021-12-31	2021	Ghana	Greater Accra	Greater Accra	GISAID_world
hCoV-19/Ghana/WACCBIP-GS2411/2021	BA.1	2021-12-31	2021	Ghana	Greater Accra	Greater Accra	GISAID_world
hCoV-19/Spain/MD-HGUGM-6411124/2022	BA.2	2022-02-18	2022	Spain	Madrid	Madrid	GISAID_world
hCoV-19/Bonaire/BQ-RIVM-87375/2022	BA.1	2022-02-01	2022	Bonaire	Bonaire	Bonaire	GISAID_world
hCoV-19/Bonaire/BQ-RIVM-87377/2022	BA.1.1	2022-02-01	2022	Bonaire	Bonaire	Bonaire	GISAID_world
hCoV-19/Bonaire/BQ-RIVM-87378/2022	BA.1.1	2022-02-01	2022	Bonaire	Bonaire	Bonaire	GISAID_world
hCoV-19/Bonaire/BQ-RIVM-87379/2022	BA.1	2022-02-02	2022	Bonaire	Bonaire	Bonaire	GISAID_world
hCoV-19/Bonaire/BQ-RIVM-87380/2022	BA.1.1	2022-02-02	2022	Bonaire	Bonaire	Bonaire	GISAID_world
hCoV-19/Curacao/CW-RIVM-87882/2022	BA.1.1	2022-02-02	2022	Curacao	Curacao	Curacao	GISAID_world
hCoV-19/Curacao/CW-RIVM-87885/2022	BA.1.1	2022-02-03	2022	Curacao	Curacao	Curacao	GISAID_world
hCoV-19/Curacao/CW-RIVM-87887/2022	BA.1	2022-02-03	2022	Curacao	Curacao	Curacao	GISAID_world
hCoV-19/Curacao/CW-RIVM-88429/2022	BA.1.1	2022-02-08	2022	Curacao	Curacao	Curacao	GISAID_world
hCoV-19/Netherlands/UT-RIVM-87756/2022	BA.1.1	2022-02-10	2022	Netherlands	Utrecht	Utrecht	GISAID_world
hCoV-19/Canada/MB-CPL-350827/2022	BA.1.14	2022-02-02	2022	Canada	Manitoba	Manitoba	GISAID_world
hCoV-19/Canada/MB-CPL-350854/2022	BA.1	2022-01-28	2022	Canada	Manitoba	Manitoba	GISAID_world
hCoV-19/Canada/MB-CPL-346432/2022	BA.2.3	2022-02-02	2022	Canada	Manitoba	Manitoba	GISAID_world
hCoV-19/SouthKorea/KDCA29442/2022	BA.1.1	2022-02-01	2022	South Korea	South Korea	South Korea	GISAID_world
hCoV-19/SouthKorea/KDCA29756/2022	BA.1.1	2022-02-06	2022	South Korea	South Korea	South Korea	GISAID_world
hCoV-19/Norway/5480/2022	BA.1	2022-01-25	2022	Norway	Rogaland	Rogaland	GISAID_world
hCoV-19/Guadeloupe/IPP10464/2022	BA.1.1	2022-02-07	2022	Guadeloupe	Basse-Terre	Basse-Terre	GISAID_world
hCoV-19/Saint-Martin/IPP10706/2022	BA.1.1	2022-02-07	2022	Saint Martin	Saint Martin	Saint Martin	GISAID_world
hCoV-19/Canada/SK-NML-348144/2022	BA.1.1	2022-02-04	2022	Canada	Saskatchewan	Saskatchewan	GISAID_world
hCoV-19/Norway/6571/2022	BA.2	2022-02-07	2022	Norway	Innlandet	Innlandet	GISAID_world
hCoV-19/Norway/7285/2022	BA.2	2022-02-06	2022	Norway	Nordland	Nordland	GISAID_world
hCoV-19/USA/IL-S22WGS872/2022	BA.1.1	2022-02-13	2022	USA	Illinois	Illinois	GISAID_world
hCoV-19/USA/CO-CDC-ASC210552826/2022	BA.1.1	2022-02-10	2022	USA	Colorado	Colorado	GISAID_world
hCoV-19/USA/MI-CDC-STM-6MVYBEG86/2022	BA.1.15	2022-02-09	2022	USA	Michigan	Michigan	GISAID_world
hCoV-19/CostaRica/INC-3031-741563/2022	BA.1.1	2022-02-03	2022	Costa Rica	Alajuela	Alajuela	GISAID_world
hCoV-19/CostaRica/INC-3047-741959/2022	BA.1.1	2022-02-07	2022	Costa Rica	Cartago CR	Cartago CR	GISAID_world
hCoV-19/CostaRica/INC-3048-742286/2022	BA.1.1	2022-02-07	2022	Costa Rica	San Jose	San Jose	GISAID_world
hCoV-19/CostaRica/INC-3071-742489/2022	BA.1	2022-02-03	2022	Costa Rica	Guanacaste	Guanacaste	GISAID_world
hCoV-19/CostaRica/INC-3077-742531/2022	BA.1.15	2022-02-08	2022	Costa Rica	San Jose	San Jose	GISAID_world
hCoV-19/FrenchGuiana/IPG202200285/2022	BA.1.17	2022-02-12	2022	French Guiana	Saint Laurent Du Maroni	Saint Laurent Du Maroni	GISAID_world
MN996532.2	A	2013-01-01	2013	China	Yunnan	Yunnan	bat
hCoV-19/Russia/MOW-Moscow_PMVL-O11/2021	BA.1	2021-12-03	2021	Russia	Moscow	Moscow	GISAID_russia
hCoV-19/Russia/MOW-Moscow_PMVL-O16/2021	BA.1	2021-12-03	2021	Russia	Moscow	Moscow	GISAID_russia
hCoV-19/Russia/SPE-RII-MH44356S/2021	BA.1.15	2021-12-13	2021	Russia	Saint Petersburg	Saint Petersburg	GISAID_russia
hCoV-19/Russia/SPE-RII-5921S/2021	BA.1.1	2021-12-16	2021	Russia	Saint Petersburg	Saint Petersburg	GISAID_russia
hCoV-19/Russia/SPE-RII-5922S/2021	BA.1.1	2021-12-16	2021	Russia	Saint Petersburg	Saint Petersburg	GISAID_russia
hCoV-19/Russia/SPE-RII-5994S/2021	BA.1.1	2021-12-16	2021	Russia	Saint Petersburg	Saint Petersburg	GISAID_russia
hCoV-19/Russia/SPE-RII-6072S/2021	BA.1.1	2021-12-17	2021	Russia	Saint Petersburg	Saint Petersburg	GISAID_russia
hCoV-19/Russia/SPE-RII-6075S/2021	BA.1.1	2021-12-17	2021	Russia	Saint Petersburg	Saint Petersburg	GISAID_russia
hCoV-19/Russia/SPE-RII-6081S/2021	BA.1.1	2021-12-17	2021	Russia	Saint Petersburg	Saint Petersburg	GISAID_russia
hCoV-19/Russia/SPE-RII-6086S/2021	BA.1.1	2021-12-17	2021	Russia	Saint Petersburg	Saint Petersburg	GISAID_russia
hCoV-19/Russia/SPE-RII-6090S/2021	BA.1.1	2021-12-17	2021	Russia	Saint Petersburg	Saint Petersburg	GISAID_russia
hCoV-19/Russia/SPE-RII-6091S/2021	BA.1.1	2021-12-17	2021	Russia	Saint Petersburg	Saint Petersburg	GISAID_russia
hCoV-19/Russia/SPE-RII-6094S/2021	BA.1.1	2021-12-17	2021	Russia	Saint Petersburg	Saint Petersburg	GISAID_russia
hCoV-19/Russia/SPE-RII-6100S/2021	BA.1.1	2021-12-17	2021	Russia	Saint Petersburg	Saint Petersburg	GISAID_russia
hCoV-19/Russia/SPE-RII-6101S/2021	BA.1.1	2021-12-17	2021	Russia	Saint Petersburg	Saint Petersburg	GISAID_russia
hCoV-19/Russia/SPE-RII-6168S/2021	BA.1.1	2021-12-17	2021	Russia	Saint Petersburg	Saint Petersburg	GISAID_russia
hCoV-19/Russia/SPE-RII-6169S/2021	BA.1.1	2021-12-17	2021	Russia	Saint Petersburg	Saint Petersburg	GISAID_russia
hCoV-19/Russia/SPE-RII-6196S/2021	BA.1.1	2021-12-17	2021	Russia	Saint Petersburg	Saint Petersburg	GISAID_russia
hCoV-19/Russia/SPE-RII-6199S/2021	BA.1.1	2021-12-17	2021	Russia	Saint Petersburg	Saint Petersburg	GISAID_russia
hCoV-19/Russia/SPE-RII-6202S/2021	BA.1.1	2021-12-17	2021	Russia	Saint Petersburg	Saint Petersburg	GISAID_russia
hCoV-19/Russia/SPE-RII-6207S/2021	BA.1.1	2021-12-17	2021	Russia	Saint Petersburg	Saint Petersburg	GISAID_russia
hCoV-19/Russia/SPE-RII-6212S/2021	BA.1.1	2021-12-17	2021	Russia	Saint Petersburg	Saint Petersburg	GISAID_russia
hCoV-19/Russia/SPE-RII-6222S/2021	BA.1.1	2021-12-17	2021	Russia	Saint Petersburg	Saint Petersburg	GISAID_russia
hCoV-19/Russia/SPE-RII-6236S/2021	BA.1.1	2021-12-17	2021	Russia	Saint Petersburg	Saint Petersburg	GISAID_russia
hCoV-19/Russia/SPE-RII-6243S/2021	BA.1.1	2021-12-17	2021	Russia	Saint Petersburg	Saint Petersburg	GISAID_russia
hCoV-19/Russia/SPE-RII-6293S/2021	BA.1.1	2021-12-17	2021	Russia	Saint Petersburg	Saint Petersburg	GISAID_russia
hCoV-19/Russia/ROS-RII-MH45748S/2021	BA.1.1	2021-12-10	2021	Russia	Rostov Region	Rostov Region	GISAID_russia
hCoV-19/Russia/SPE-RII-6343S/2021	BA.1.1	2021-12-17	2021	Russia	Saint Petersburg	Saint Petersburg	GISAID_russia
hCoV-19/Russia/SPE-RII-6345S/2021	BA.1.1	2021-12-17	2021	Russia	Saint Petersburg	Saint Petersburg	GISAID_russia
hCoV-19/Russia/SPE-RII-6347S/2021	BA.1.1	2021-12-17	2021	Russia	Saint Petersburg	Saint Petersburg	GISAID_russia
hCoV-19/Russia/SPE-RII-6350S/2021	BA.1.1	2021-12-17	2021	Russia	Saint Petersburg	Saint Petersburg	GISAID_russia
hCoV-19/Russia/SPE-RII-6351S/2021	BA.1.1	2021-12-17	2021	Russia	Saint Petersburg	Saint Petersburg	GISAID_russia
hCoV-19/Russia/SPE-RII-6370S/2021	BA.1	2021-12-17	2021	Russia	Saint Petersburg	Saint Petersburg	GISAID_russia
hCoV-19/Russia/SPE-RII-6379S/2021	BA.1.9	2021-12-19	2021	Russia	Saint Petersburg	Saint Petersburg	GISAID_russia
hCoV-19/Russia/SPE-RII-6803S/2021	BA.1.1	2021-12-21	2021	Russia	Saint Petersburg	Saint Petersburg	GISAID_russia
hCoV-19/Russia/SPE-RII-5921V1/2021	BA.1.1	2021-12-16	2021	Russia	Saint Petersburg	Saint Petersburg	GISAID_russia
hCoV-19/Russia/SPE-RII-5994V1/2021	BA.1.1	2021-12-16	2021	Russia	Saint Petersburg	Saint Petersburg	GISAID_russia
hCoV-19/Russia/SPE-RII-6086V1/2021	BA.1.1	2021-12-17	2021	Russia	Saint Petersburg	Saint Petersburg	GISAID_russia
hCoV-19/Russia/SPE-RII-6222V1/2021	BA.1.1	2021-12-17	2021	Russia	Saint Petersburg	Saint Petersburg	GISAID_russia
hCoV-19/Russia/SPE-RII-6236V1/2021	BA.1.1	2021-12-17	2021	Russia	Saint Petersburg	Saint Petersburg	GISAID_russia
hCoV-19/Russia/SPE-RII-6243V1/2021	BA.1.1	2021-12-17	2021	Russia	Saint Petersburg	Saint Petersburg	GISAID_russia
hCoV-19/Russia/SPE-RII-6293V1/2021	BA.1.1	2021-12-17	2021	Russia	Saint Petersburg	Saint Petersburg	GISAID_russia
hCoV-19/Russia/SPE-RII-6078S/2021	BA.1.1	2021-12-17	2021	Russia	Saint Petersburg	Saint Petersburg	GISAID_russia
hCoV-19/Russia/SPE-RII-6522S/2021	BA.1.1	2021-12-20	2021	Russia	Saint Petersburg	Saint Petersburg	GISAID_russia
hCoV-19/Russia/SPE-RII-6542S/2021	BA.1.1	2021-12-20	2021	Russia	Saint Petersburg	Saint Petersburg	GISAID_russia
hCoV-19/Russia/SPE-RII-6868S/2021	BA.1.1	2021-12-22	2021	Russia	Saint Petersburg	Saint Petersburg	GISAID_russia
hCoV-19/Russia/SPE-RII-7001S/2021	BA.1.1	2021-12-22	2021	Russia	Saint Petersburg	Saint Petersburg	GISAID_russia
hCoV-19/Russia/SPE-RII-7039S/2021	BA.1.1	2021-12-22	2021	Russia	Saint Petersburg	Saint Petersburg	GISAID_russia
hCoV-19/Russia/SPE-RII-7041S/2021	BA.1.1	2021-12-22	2021	Russia	Saint Petersburg	Saint Petersburg	GISAID_russia
hCoV-19/Russia/SPE-RII-7048S/2021	BA.1.1	2021-12-22	2021	Russia	Saint Petersburg	Saint Petersburg	GISAID_russia
hCoV-19/Russia/SPE-RII-7059S/2021	BA.1.1	2021-12-22	2021	Russia	Saint Petersburg	Saint Petersburg	GISAID_russia
hCoV-19/Russia/SPE-RII-7060S/2021	BA.1.1	2021-12-22	2021	Russia	Saint Petersburg	Saint Petersburg	GISAID_russia
hCoV-19/Russia/SPE-RII-7070S/2021	BA.1.1	2021-12-22	2021	Russia	Saint Petersburg	Saint Petersburg	GISAID_russia
hCoV-19/Russia/SPE-RII-7076S/2021	BA.1.1	2021-12-22	2021	Russia	Saint Petersburg	Saint Petersburg	GISAID_russia
hCoV-19/Russia/SPE-RII-7101S/2021	BA.1.1	2021-12-22	2021	Russia	Saint Petersburg	Saint Petersburg	GISAID_russia
hCoV-19/Russia/SPE-RII-7127S/2021	BA.1.1	2021-12-22	2021	Russia	Saint Petersburg	Saint Petersburg	GISAID_russia
hCoV-19/Russia/SPE-RII-7141S/2021	BA.1.1	2021-12-22	2021	Russia	Saint Petersburg	Saint Petersburg	GISAID_russia
hCoV-19/Russia/SPE-RII-7142S/2021	BA.1.1	2021-12-22	2021	Russia	Saint Petersburg	Saint Petersburg	GISAID_russia
hCoV-19/Russia/SPE-RII-7152S/2021	BA.1.1	2021-12-22	2021	Russia	Saint Petersburg	Saint Petersburg	GISAID_russia
hCoV-19/Russia/SPE-RII-7178S/2021	BA.1	2021-12-17	2021	Russia	Saint Petersburg	Saint Petersburg	GISAID_russia
hCoV-19/Russia/SPE-RII-7379S/2021	BA.1.1	2021-12-24	2021	Russia	Saint Petersburg	Saint Petersburg	GISAID_russia
hCoV-19/Russia/SPE-RII-7384S/2021	BA.1.1	2021-12-24	2021	Russia	Saint Petersburg	Saint Petersburg	GISAID_russia
hCoV-19/Russia/SPE-RII-7412S/2021	BA.1.1	2021-12-24	2021	Russia	Saint Petersburg	Saint Petersburg	GISAID_russia
hCoV-19/Russia/SPE-RII-7413S/2021	BA.1.1	2021-12-24	2021	Russia	Saint Petersburg	Saint Petersburg	GISAID_russia
hCoV-19/Russia/SPE-RII-7483S/2021	BA.1.1	2021-12-24	2021	Russia	Saint Petersburg	Saint Petersburg	GISAID_russia
hCoV-19/Russia/SPE-RII-7491S/2021	BA.1.1	2021-12-24	2021	Russia	Saint Petersburg	Saint Petersburg	GISAID_russia
hCoV-19/Russia/SPE-RII-7504S/2021	BA.1.1	2021-12-24	2021	Russia	Saint Petersburg	Saint Petersburg	GISAID_russia
hCoV-19/Russia/SPE-RII-7509S/2021	BA.1.1	2021-12-24	2021	Russia	Saint Petersburg	Saint Petersburg	GISAID_russia
hCoV-19/Russia/SPE-RII-7539S/2021	BA.1.1	2021-12-24	2021	Russia	Saint Petersburg	Saint Petersburg	GISAID_russia
hCoV-19/Russia/SPE-RII-7547S/2021	BA.1.1	2021-12-24	2021	Russia	Saint Petersburg	Saint Petersburg	GISAID_russia
hCoV-19/Russia/SPE-RII-MH45905S/2021	BA.1.15.1	2021-12-17	2021	Russia	Saint Petersburg	Saint Petersburg	GISAID_russia
hCoV-19/Russia/SPE-RII-MH45921S/2021	BA.1.15	2021-12-17	2021	Russia	Saint Petersburg	Saint Petersburg	GISAID_russia
hCoV-19/Russia/SPE-RII-MH46106S/2021	BA.1.1	2021-12-17	2021	Russia	Saint Petersburg	Saint Petersburg	GISAID_russia
hCoV-19/Russia/SPE-RII-MH46488S/2021	BA.1.1	2021-12-19	2021	Russia	Saint Petersburg	Saint Petersburg	GISAID_russia
hCoV-19/Russia/SPE-RII-MH46489S/2021	BA.1.1	2021-12-19	2021	Russia	Saint Petersburg	Saint Petersburg	GISAID_russia
hCoV-19/Russia/SPE-RII-MH46492S/2021	BA.1.1	2021-12-19	2021	Russia	Saint Petersburg	Saint Petersburg	GISAID_russia
hCoV-19/Russia/SPE-RII-MH46503S/2021	BA.1.1	2021-12-19	2021	Russia	Saint Petersburg	Saint Petersburg	GISAID_russia
hCoV-19/Russia/SPE-RII-MH46507S/2021	BA.1.1	2021-12-19	2021	Russia	Saint Petersburg	Saint Petersburg	GISAID_russia
hCoV-19/Russia/SPE-RII-MH46625S/2021	BA.1.17	2021-12-20	2021	Russia	Saint Petersburg	Saint Petersburg	GISAID_russia
hCoV-19/Russia/SPE-RII-MH46847S/2021	BA.1.1	2021-12-20	2021	Russia	Saint Petersburg	Saint Petersburg	GISAID_russia
hCoV-19/Russia/SPE-RII-MH46850S/2021	BA.1.1	2021-12-20	2021	Russia	Saint Petersburg	Saint Petersburg	GISAID_russia
hCoV-19/Russia/SPE-RII-MH46852S/2021	BA.1.1	2021-12-20	2021	Russia	Saint Petersburg	Saint Petersburg	GISAID_russia
hCoV-19/Russia/SPE-RII-MH46855S/2021	BA.1.1	2021-12-20	2021	Russia	Saint Petersburg	Saint Petersburg	GISAID_russia
hCoV-19/Russia/SPE-RII-MH46856S/2021	BA.1.1	2021-12-20	2021	Russia	Saint Petersburg	Saint Petersburg	GISAID_russia
hCoV-19/Russia/SPE-RII-MH46857S/2021	BA.1.1	2021-12-20	2021	Russia	Saint Petersburg	Saint Petersburg	GISAID_russia
hCoV-19/Russia/SPE-RII-MH46858S/2021	BA.1.1	2021-12-20	2021	Russia	Saint Petersburg	Saint Petersburg	GISAID_russia
hCoV-19/Russia/SPE-RII-MH46859S/2021	BA.1.1	2021-12-20	2021	Russia	Saint Petersburg	Saint Petersburg	GISAID_russia
hCoV-19/Russia/SPE-RII-MH46861S/2021	BA.1.1	2021-12-20	2021	Russia	Saint Petersburg	Saint Petersburg	GISAID_russia
hCoV-19/Russia/SPE-RII-MH46863S/2021	BA.1.1	2021-12-20	2021	Russia	Saint Petersburg	Saint Petersburg	GISAID_russia
hCoV-19/Russia/SPE-RII-MH46864S/2021	BA.1.1	2021-12-20	2021	Russia	Saint Petersburg	Saint Petersburg	GISAID_russia
hCoV-19/Russia/SPE-RII-MH46865S/2021	BA.1.1	2021-12-20	2021	Russia	Saint Petersburg	Saint Petersburg	GISAID_russia
hCoV-19/Russia/SPE-RII-MH46869S/2021	BA.1.1	2021-12-20	2021	Russia	Saint Petersburg	Saint Petersburg	GISAID_russia
hCoV-19/Russia/SPE-RII-MH46870S/2021	BA.1.1	2021-12-20	2021	Russia	Saint Petersburg	Saint Petersburg	GISAID_russia
hCoV-19/Russia/SPE-RII-MH46951S/2021	BA.1	2021-12-22	2021	Russia	Saint Petersburg	Saint Petersburg	GISAID_russia
hCoV-19/Russia/SPE-RII-MH46964S/2021	BA.1	2021-12-22	2021	Russia	Saint Petersburg	Saint Petersburg	GISAID_russia
hCoV-19/Russia/SPE-RII-MH47042S/2021	BA.1	2021-12-22	2021	Russia	Saint Petersburg	Saint Petersburg	GISAID_russia
hCoV-19/Russia/SPE-RII-MH47123S/2021	BA.1	2021-12-22	2021	Russia	Saint Petersburg	Saint Petersburg	GISAID_russia
hCoV-19/Russia/SPE-RII-MH47274S/2021	BA.1.15.1	2021-12-23	2021	Russia	Saint Petersburg	Saint Petersburg	GISAID_russia
hCoV-19/Russia/SPE-RII-MH47276S/2021	BA.1.1	2021-12-23	2021	Russia	Saint Petersburg	Saint Petersburg	GISAID_russia
hCoV-19/Russia/SPE-RII-MH47338S/2021	BA.1.17	2021-12-23	2021	Russia	Saint Petersburg	Saint Petersburg	GISAID_russia
hCoV-19/Russia/SPE-RII-MH47346S/2021	BA.1	2021-12-23	2021	Russia	Saint Petersburg	Saint Petersburg	GISAID_russia
hCoV-19/Russia/SPE-RII-MH47359S/2021	BA.1.1	2021-12-23	2021	Russia	Saint Petersburg	Saint Petersburg	GISAID_russia
hCoV-19/Russia/SPE-RII-MH47560S/2021	BA.1.1	2021-12-21	2021	Russia	Saint Petersburg	Saint Petersburg	GISAID_russia
hCoV-19/Russia/SPE-RII-MH47561S/2021	BA.1.1	2021-12-21	2021	Russia	Saint Petersburg	Saint Petersburg	GISAID_russia
hCoV-19/Russia/SPE-RII-MH47562S/2021	BA.1.1	2021-12-21	2021	Russia	Saint Petersburg	Saint Petersburg	GISAID_russia
hCoV-19/Russia/SPE-RII-MH47564S/2021	BA.1.1	2021-12-21	2021	Russia	Saint Petersburg	Saint Petersburg	GISAID_russia
hCoV-19/Russia/SPE-RII-MH47565S/2021	BA.1.1	2021-12-21	2021	Russia	Saint Petersburg	Saint Petersburg	GISAID_russia
hCoV-19/Russia/SPE-RII-MH47566S/2021	BA.1.1	2021-12-21	2021	Russia	Saint Petersburg	Saint Petersburg	GISAID_russia
hCoV-19/Russia/SPE-RII-MH47567S/2021	BA.1.1	2021-12-21	2021	Russia	Saint Petersburg	Saint Petersburg	GISAID_russia
hCoV-19/Russia/SPE-RII-MH47570S/2021	BA.1.1	2021-12-21	2021	Russia	Saint Petersburg	Saint Petersburg	GISAID_russia
hCoV-19/Russia/SPE-RII-MH47573S/2021	BA.1.1	2021-12-22	2021	Russia	Saint Petersburg	Saint Petersburg	GISAID_russia
hCoV-19/Russia/SPE-RII-MH47576S/2021	BA.1.1	2021-12-22	2021	Russia	Saint Petersburg	Saint Petersburg	GISAID_russia
hCoV-19/Russia/SPE-RII-MH47582S/2021	BA.1.1	2021-12-23	2021	Russia	Saint Petersburg	Saint Petersburg	GISAID_russia
hCoV-19/Russia/SPE-RII-MH47583S/2021	BA.1.1	2021-12-23	2021	Russia	Saint Petersburg	Saint Petersburg	GISAID_russia
hCoV-19/Russia/SPE-RII-MH47584S/2021	BA.1.1	2021-12-23	2021	Russia	Saint Petersburg	Saint Petersburg	GISAID_russia
hCoV-19/Russia/SPE-RII-MH48532S/2021	BA.1.1	2021-12-29	2021	Russia	Saint Petersburg	Saint Petersburg	GISAID_russia
hCoV-19/Russia/SPE-RII-MH48533S/2021	BA.1	2021-12-29	2021	Russia	Saint Petersburg	Saint Petersburg	GISAID_russia
hCoV-19/Russia/SPE-RII-MH48537S/2021	BA.1.17	2021-12-29	2021	Russia	Saint Petersburg	Saint Petersburg	GISAID_russia
hCoV-19/Russia/SPE-RII-MH48547S/2021	BA.1.1	2021-12-29	2021	Russia	Saint Petersburg	Saint Petersburg	GISAID_russia
hCoV-19/Russia/SPE-RII-MH48548S/2021	BA.1.1	2021-12-29	2021	Russia	Saint Petersburg	Saint Petersburg	GISAID_russia
hCoV-19/Russia/SPE-RII-MH48549S/2021	BA.1.1	2021-12-29	2021	Russia	Saint Petersburg	Saint Petersburg	GISAID_russia
hCoV-19/Russia/SPE-RII-MH48553S/2021	BA.1.15.1	2021-12-29	2021	Russia	Saint Petersburg	Saint Petersburg	GISAID_russia
hCoV-19/Russia/SPE-RII-MH48571S/2021	BA.1.1	2021-12-29	2021	Russia	Saint Petersburg	Saint Petersburg	GISAID_russia
hCoV-19/Russia/PSK-RII-MH48574S/2021	BA.1.1.15	2021-12-29	2021	Russia	Pskov Region	Pskov Region	GISAID_russia
hCoV-19/Russia/SPE-RII-MH48591S/2021	BA.1.17	2021-12-29	2021	Russia	Saint Petersburg	Saint Petersburg	GISAID_russia
hCoV-19/Russia/SPE-RII-MH48601S/2021	BA.1.1	2021-12-29	2021	Russia	Saint Petersburg	Saint Petersburg	GISAID_russia
hCoV-19/Russia/SPE-RII-MH48610S/2021	BA.1.1	2021-12-29	2021	Russia	Saint Petersburg	Saint Petersburg	GISAID_russia
hCoV-19/Russia/SPE-RII-MH48650S/2021	BA.1.1	2021-12-29	2021	Russia	Saint Petersburg	Saint Petersburg	GISAID_russia
hCoV-19/Russia/SPE-RII-MH48654S/2021	BA.1	2021-12-29	2021	Russia	Saint Petersburg	Saint Petersburg	GISAID_russia
hCoV-19/Russia/SPE-RII-MH48676S/2021	BA.1	2021-12-29	2021	Russia	Saint Petersburg	Saint Petersburg	GISAID_russia
hCoV-19/Russia/SPE-RII-MH48677S/2021	BA.1	2021-12-29	2021	Russia	Saint Petersburg	Saint Petersburg	GISAID_russia
hCoV-19/Russia/SPE-RII-MH48679S/2021	BA.1.1	2021-12-29	2021	Russia	Saint Petersburg	Saint Petersburg	GISAID_russia
hCoV-19/Russia/SPE-RII-MH48701S/2021	BA.1.17	2021-12-29	2021	Russia	Saint Petersburg	Saint Petersburg	GISAID_russia
hCoV-19/Russia/SPE-RII-MH48758S/2021	BA.1.1	2021-12-29	2021	Russia	Saint Petersburg	Saint Petersburg	GISAID_russia
hCoV-19/Russia/Moscow171619-031221/2021	BA.1	2021-12-03	2021	Russia	Moscow	Moscow	GISAID_russia
hCoV-19/Russia/MOW_FPI-326/2022	BA.1.1	2022-01-12	2022	Russia	Moscow	Moscow	GISAID_russia
hCoV-19/Russia/MOW_FPI-211/2022	BA.1.1	2022-01-10	2022	Russia	Moscow	Moscow	GISAID_russia
hCoV-19/Russia/BA-RII-MH50579S/2022	BA.1.1	2022-01-04	2022	Russia	Republic of Bashkortostan	Republic of Bashkortostan	GISAID_russia
hCoV-19/Russia/BA-RII-MH50581S/2022	BA.1.15	2022-01-08	2022	Russia	Republic of Bashkortostan	Republic of Bashkortostan	GISAID_russia
hCoV-19/Russia/MOW-Moscow_PMVL-OA48/2021	BA.1.17	2021-12-03	2021	Russia	Moscow	Moscow	GISAID_russia
hCoV-19/Russia/MOW-Moscow_PMVL-OA118/2021	BA.1.17	2021-12-03	2021	Russia	Moscow	Moscow	GISAID_russia
hCoV-19/Russia/MOW-Moscow_PMVL-OA129/2021	BA.1.17	2021-12-03	2021	Russia	Moscow	Moscow	GISAID_russia
hCoV-19/Russia/MOW-Moscow_PMVL-OA102/2021	BA.1	2021-12-03	2021	Russia	Moscow	Moscow	GISAID_russia
hCoV-19/Russia/MOW-Moscow_PMVL-OA114/2021	BA.1	2021-12-03	2021	Russia	Moscow	Moscow	GISAID_russia
hCoV-19/Russia/MOW-Moscow_PMVL-OA113/2021	BA.1	2021-12-03	2021	Russia	Moscow	Moscow	GISAID_russia
hCoV-19/Russia/MOW-Moscow_PMVL-OA124/2021	BA.1.17	2021-12-03	2021	Russia	Moscow	Moscow	GISAID_russia
hCoV-19/Russia/SPE-RII-10283S/2022	BA.1.1	2022-01-19	2022	Russia	Saint Petersburg	Saint Petersburg	GISAID_russia
hCoV-19/Russia/SPE-RII-10294S/2022	BA.1.1	2022-01-19	2022	Russia	Saint Petersburg	Saint Petersburg	GISAID_russia
hCoV-19/Russia/SPE-RII-10399S/2022	BA.1.1	2022-01-20	2022	Russia	Saint Petersburg	Saint Petersburg	GISAID_russia
hCoV-19/Russia/SPE-RII-10400S/2022	BA.1.17	2022-01-21	2022	Russia	Saint Petersburg	Saint Petersburg	GISAID_russia
hCoV-19/Russia/SPE-RII-9547S/2022	BA.1	2022-01-12	2022	Russia	Saint Petersburg	Saint Petersburg	GISAID_russia
hCoV-19/Russia/SPE-RII-9552S/2022	BA.1.1	2022-01-12	2022	Russia	Saint Petersburg	Saint Petersburg	GISAID_russia
hCoV-19/Russia/SPE-RII-9569S/2022	BA.1.1	2022-01-12	2022	Russia	Saint Petersburg	Saint Petersburg	GISAID_russia
hCoV-19/Russia/SPE-RII-9570S/2022	BA.1.17	2022-01-12	2022	Russia	Saint Petersburg	Saint Petersburg	GISAID_russia
hCoV-19/Russia/SPE-RII-9601S/2022	BA.1.1	2022-01-11	2022	Russia	Saint Petersburg	Saint Petersburg	GISAID_russia
hCoV-19/Russia/SPE-RII-9663S/2022	BA.1.1	2022-01-13	2022	Russia	Saint Petersburg	Saint Petersburg	GISAID_russia
hCoV-19/Russia/BA-RII-MH50589S/2022	BA.1.1	2022-01-11	2022	Russia	Republic of Bashkortostan	Republic of Bashkortostan	GISAID_russia
hCoV-19/Russia/KL-RII-MH50635S/2022	BA.1	2022-01-02	2022	Russia	Republic of Kalmykia	Republic of Kalmykia	GISAID_russia
hCoV-19/Russia/KL-RII-MH50646S/2022	BA.1.1	2022-01-03	2022	Russia	Republic of Kalmykia	Republic of Kalmykia	GISAID_russia
hCoV-19/Russia/AST-RII-MH51354S/2021	BA.1	2021-12-28	2021	Russia	Astrakhan Region	Astrakhan Region	GISAID_russia
hCoV-19/Russia/AST-RII-MH51377S/2022	BA.1	2022-01-03	2022	Russia	Astrakhan Region	Astrakhan Region	GISAID_russia
hCoV-19/Russia/AST-RII-MH51381S/2022	BA.1	2022-01-04	2022	Russia	Astrakhan Region	Astrakhan Region	GISAID_russia
hCoV-19/Russia/AST-RII-MH51389S/2022	BA.1	2022-01-07	2022	Russia	Astrakhan Region	Astrakhan Region	GISAID_russia
hCoV-19/Russia/AST-RII-MH51394S/2022	BA.1	2022-01-09	2022	Russia	Astrakhan Region	Astrakhan Region	GISAID_russia
hCoV-19/Russia/AST-RII-MH51395S/2022	BA.1	2022-01-09	2022	Russia	Astrakhan Region	Astrakhan Region	GISAID_russia
hCoV-19/Russia/AST-RII-MH51396S/2022	BA.1	2022-01-09	2022	Russia	Astrakhan Region	Astrakhan Region	GISAID_russia
hCoV-19/Russia/ULY-RII-MH51511S/2022	BA.1.1.13	2022-01-12	2022	Russia	Ulyanovsk Region	Ulyanovsk Region	GISAID_russia
hCoV-19/Russia/ULY-RII-MH51512S/2022	BA.1.1.13	2022-01-12	2022	Russia	Ulyanovsk Region	Ulyanovsk Region	GISAID_russia
hCoV-19/Russia/ULY-RII-MH51513S/2022	BA.1.1.13	2022-01-12	2022	Russia	Ulyanovsk Region	Ulyanovsk Region	GISAID_russia
hCoV-19/Russia/ULY-RII-MH51518S/2022	BA.1.1.13	2022-01-13	2022	Russia	Ulyanovsk Region	Ulyanovsk Region	GISAID_russia
hCoV-19/Russia/ULY-RII-MH51521S/2022	BA.1.1.13	2022-01-13	2022	Russia	Ulyanovsk Region	Ulyanovsk Region	GISAID_russia
hCoV-19/Russia/ULY-RII-MH51522S/2022	BA.1.1	2022-01-13	2022	Russia	Ulyanovsk Region	Ulyanovsk Region	GISAID_russia
hCoV-19/Russia/ULY-RII-MH51525S/2022	BA.1.1.13	2022-01-13	2022	Russia	Ulyanovsk Region	Ulyanovsk Region	GISAID_russia
hCoV-19/Russia/ULY-RII-MH51526S/2022	BA.1.1	2022-01-13	2022	Russia	Ulyanovsk Region	Ulyanovsk Region	GISAID_russia
hCoV-19/Russia/ULY-RII-MH51527S/2022	BA.1.1	2022-01-13	2022	Russia	Ulyanovsk Region	Ulyanovsk Region	GISAID_russia
hCoV-19/Russia/SPE-RII-MH51529S/2022	BA.1	2022-01-17	2022	Russia	Saint Petersburg	Saint Petersburg	GISAID_russia
hCoV-19/Russia/SPE-RII-MH51532S/2022	BA.2	2022-01-17	2022	Russia	Saint Petersburg	Saint Petersburg	GISAID_russia
hCoV-19/Russia/SPE-RII-MH51533S/2022	BA.1	2022-01-17	2022	Russia	Saint Petersburg	Saint Petersburg	GISAID_russia
hCoV-19/Russia/SPE-RII-MH51534S/2022	BA.1.1	2022-01-15	2022	Russia	Saint Petersburg	Saint Petersburg	GISAID_russia
hCoV-19/Russia/SPE-RII-MH51538S/2022	BA.1.17	2022-01-17	2022	Russia	Saint Petersburg	Saint Petersburg	GISAID_russia
hCoV-19/Russia/SPE-RII-MH51539S/2022	BA.2	2022-01-17	2022	Russia	Saint Petersburg	Saint Petersburg	GISAID_russia
hCoV-19/Russia/SPE-RII-MH51542S/2022	BA.1.17	2022-01-17	2022	Russia	Saint Petersburg	Saint Petersburg	GISAID_russia
hCoV-19/Russia/SPE-RII-MH51543S/2022	BA.1.17	2022-01-17	2022	Russia	Saint Petersburg	Saint Petersburg	GISAID_russia
hCoV-19/Russia/SPE-RII-MH51549S/2022	BA.1.1	2022-01-14	2022	Russia	Saint Petersburg	Saint Petersburg	GISAID_russia
hCoV-19/Russia/SPE-RII-MH51550S/2022	BA.1.1	2022-01-14	2022	Russia	Saint Petersburg	Saint Petersburg	GISAID_russia
hCoV-19/Russia/SPE-RII-MH51551S/2022	BA.1.1	2022-01-14	2022	Russia	Saint Petersburg	Saint Petersburg	GISAID_russia
hCoV-19/Russia/SPE-RII-MH51554S/2022	BA.1.17	2022-01-14	2022	Russia	Saint Petersburg	Saint Petersburg	GISAID_russia
hCoV-19/Russia/SPE-RII-MH51556S/2022	BA.1.1	2022-01-14	2022	Russia	Saint Petersburg	Saint Petersburg	GISAID_russia
hCoV-19/Russia/SPE-RII-MH51558S/2022	BA.1.1	2022-01-15	2022	Russia	Saint Petersburg	Saint Petersburg	GISAID_russia
hCoV-19/Russia/SPE-RII-MH51559S/2022	BA.1.1	2022-01-15	2022	Russia	Saint Petersburg	Saint Petersburg	GISAID_russia
hCoV-19/Russia/SPE-RII-MH51561S/2022	BA.1.1	2022-01-17	2022	Russia	Saint Petersburg	Saint Petersburg	GISAID_russia
hCoV-19/Russia/SPE-RII-MH51563S/2022	BA.1	2022-01-17	2022	Russia	Saint Petersburg	Saint Petersburg	GISAID_russia
hCoV-19/Russia/SPE-RII-MH51564S/2022	BA.1.1	2022-01-17	2022	Russia	Saint Petersburg	Saint Petersburg	GISAID_russia
hCoV-19/Russia/SPE-RII-MH51565S/2022	BA.1	2022-01-17	2022	Russia	Saint Petersburg	Saint Petersburg	GISAID_russia
hCoV-19/Russia/SPE-RII-MH51566S/2022	BA.1.15	2022-01-17	2022	Russia	Saint Petersburg	Saint Petersburg	GISAID_russia
hCoV-19/Russia/SPE-RII-MH51568S/2022	BA.1.15	2022-01-17	2022	Russia	Saint Petersburg	Saint Petersburg	GISAID_russia
hCoV-19/Russia/SPE-RII-MH51569S/2022	BA.1.10	2022-01-17	2022	Russia	Saint Petersburg	Saint Petersburg	GISAID_russia
hCoV-19/Russia/SPE-RII-MH51570S/2022	BA.1.1	2022-01-17	2022	Russia	Saint Petersburg	Saint Petersburg	GISAID_russia
hCoV-19/Russia/SPE-RII-MH51572S/2022	BA.1.1	2022-01-17	2022	Russia	Saint Petersburg	Saint Petersburg	GISAID_russia
hCoV-19/Russia/SPE-RII-MH51577S/2022	BA.1.14	2022-01-17	2022	Russia	Saint Petersburg	Saint Petersburg	GISAID_russia
hCoV-19/Russia/SPE-RII-MH51579S/2022	BA.1.1	2022-01-17	2022	Russia	Saint Petersburg	Saint Petersburg	GISAID_russia
hCoV-19/Russia/SPE-RII-MH51580S/2022	BA.1.1	2022-01-17	2022	Russia	Saint Petersburg	Saint Petersburg	GISAID_russia
hCoV-19/Russia/SPE-RII-MH51581S/2022	BA.1.1	2022-01-17	2022	Russia	Saint Petersburg	Saint Petersburg	GISAID_russia
hCoV-19/Russia/SPE-RII-MH51583S/2022	BA.1.1	2022-01-17	2022	Russia	Saint Petersburg	Saint Petersburg	GISAID_russia
hCoV-19/Russia/SPE-RII-MH51586S/2022	BA.1.1	2022-01-17	2022	Russia	Saint Petersburg	Saint Petersburg	GISAID_russia
hCoV-19/Russia/SPE-RII-MH51588S/2022	BA.1.1	2022-01-17	2022	Russia	Saint Petersburg	Saint Petersburg	GISAID_russia
hCoV-19/Russia/SPE-RII-MH51589S/2022	BA.1.1	2022-01-17	2022	Russia	Saint Petersburg	Saint Petersburg	GISAID_russia
hCoV-19/Russia/SPE-RII-MH51590S/2022	BA.1.1	2022-01-17	2022	Russia	Saint Petersburg	Saint Petersburg	GISAID_russia
hCoV-19/Russia/SPE-RII-MH51591S/2022	BA.1.1	2022-01-17	2022	Russia	Saint Petersburg	Saint Petersburg	GISAID_russia
hCoV-19/Russia/SPE-RII-MH51593S/2022	BA.1.1	2022-01-17	2022	Russia	Saint Petersburg	Saint Petersburg	GISAID_russia
hCoV-19/Russia/SPE-RII-MH51595S/2022	BA.1.1	2022-01-17	2022	Russia	Saint Petersburg	Saint Petersburg	GISAID_russia
hCoV-19/Russia/SPE-RII-MH51598S/2022	BA.1.1	2022-01-17	2022	Russia	Saint Petersburg	Saint Petersburg	GISAID_russia
hCoV-19/Russia/SPE-RII-MH51599S/2022	BA.1.1	2022-01-17	2022	Russia	Saint Petersburg	Saint Petersburg	GISAID_russia
hCoV-19/Russia/SPE-RII-MH51600S/2022	BA.1.1	2022-01-17	2022	Russia	Saint Petersburg	Saint Petersburg	GISAID_russia
hCoV-19/Russia/SPE-RII-MH51601S/2022	BA.1.1	2022-01-17	2022	Russia	Saint Petersburg	Saint Petersburg	GISAID_russia
hCoV-19/Russia/SPE-RII-MH51602S/2022	BA.1.15	2022-01-17	2022	Russia	Saint Petersburg	Saint Petersburg	GISAID_russia
hCoV-19/Russia/SPE-RII-MH51603S/2022	BA.1.1	2022-01-17	2022	Russia	Saint Petersburg	Saint Petersburg	GISAID_russia
hCoV-19/Russia/SPE-RII-MH51604S/2022	BA.2	2022-01-17	2022	Russia	Saint Petersburg	Saint Petersburg	GISAID_russia
hCoV-19/Russia/SPE-RII-MH51605S/2022	BA.1.1	2022-01-16	2022	Russia	Saint Petersburg	Saint Petersburg	GISAID_russia
hCoV-19/Russia/SPE-RII-MH51608S/2022	BA.1.1	2022-01-15	2022	Russia	Saint Petersburg	Saint Petersburg	GISAID_russia
hCoV-19/Russia/SPE-RII-MH51609S/2022	BA.1.1	2022-01-17	2022	Russia	Saint Petersburg	Saint Petersburg	GISAID_russia
hCoV-19/Russia/SPE-RII-MH51611S/2022	BA.1.17	2022-01-15	2022	Russia	Saint Petersburg	Saint Petersburg	GISAID_russia
hCoV-19/Russia/SAR-RII-MH52211S/2022	BA.1.1	2022-01-13	2022	Russia	Saratov Region	Saratov Region	GISAID_russia
hCoV-19/Russia/SAR-RII-MH52215S/2022	BA.1.1	2022-01-13	2022	Russia	Saratov Region	Saratov Region	GISAID_russia
hCoV-19/Russia/SAR-RII-MH52217S/2022	BA.1.1	2022-01-13	2022	Russia	Saratov Region	Saratov Region	GISAID_russia
hCoV-19/Russia/SAR-RII-MH52223S/2022	BA.1.1	2022-01-14	2022	Russia	Saratov Region	Saratov Region	GISAID_russia
hCoV-19/Russia/SAR-RII-MH52224S/2022	BA.1.1	2022-01-14	2022	Russia	Saratov Region	Saratov Region	GISAID_russia
hCoV-19/Russia/SAR-RII-MH52233S/2022	BA.1.1	2022-01-12	2022	Russia	Saratov Region	Saratov Region	GISAID_russia
hCoV-19/Russia/SAR-RII-MH52234S/2022	BA.1.1	2022-01-11	2022	Russia	Saratov Region	Saratov Region	GISAID_russia
hCoV-19/Russia/SAR-RII-MH52238S/2022	BA.1.15	2022-01-12	2022	Russia	Saratov Region	Saratov Region	GISAID_russia
hCoV-19/Russia/SAR-RII-MH52239S/2022	BA.1.1	2022-01-13	2022	Russia	Saratov Region	Saratov Region	GISAID_russia
hCoV-19/Russia/SAR-RII-MH52245S/2022	BA.1	2022-01-14	2022	Russia	Saratov Region	Saratov Region	GISAID_russia
hCoV-19/Russia/SAR-RII-MH52246S/2022	BA.1.1	2022-01-14	2022	Russia	Saratov Region	Saratov Region	GISAID_russia
hCoV-19/Russia/SAR-RII-MH52249S/2022	BA.1.1	2022-01-14	2022	Russia	Saratov Region	Saratov Region	GISAID_russia
hCoV-19/Russia/SAR-RII-MH52250S/2022	BA.1.1	2022-01-14	2022	Russia	Saratov Region	Saratov Region	GISAID_russia
hCoV-19/Russia/SAR-RII-MH52257S/2022	BA.1.15	2022-01-13	2022	Russia	Saratov Region	Saratov Region	GISAID_russia
hCoV-19/Russia/SAR-RII-MH52265S/2022	BA.1.1	2022-01-15	2022	Russia	Saratov Region	Saratov Region	GISAID_russia
hCoV-19/Russia/SAR-RII-MH52269S/2022	BA.1	2022-01-15	2022	Russia	Saratov Region	Saratov Region	GISAID_russia
hCoV-19/Russia/SAR-RII-MH52271S/2022	BA.1.1	2022-01-15	2022	Russia	Saratov Region	Saratov Region	GISAID_russia
hCoV-19/Russia/SAR-RII-MH52272S/2022	BA.1.1	2022-01-14	2022	Russia	Saratov Region	Saratov Region	GISAID_russia
hCoV-19/Russia/SAR-RII-MH52274S/2022	BA.1.1	2022-01-15	2022	Russia	Saratov Region	Saratov Region	GISAID_russia
hCoV-19/Russia/SAR-RII-MH52275S/2022	BA.1.1	2022-01-15	2022	Russia	Saratov Region	Saratov Region	GISAID_russia
hCoV-19/Russia/SAR-RII-MH52276S/2022	BA.1.1	2022-01-15	2022	Russia	Saratov Region	Saratov Region	GISAID_russia
hCoV-19/Russia/SAR-RII-MH52278S/2022	BA.1.1	2022-01-15	2022	Russia	Saratov Region	Saratov Region	GISAID_russia
hCoV-19/Russia/SAR-RII-MH52281S/2022	BA.1.1	2022-01-16	2022	Russia	Saratov Region	Saratov Region	GISAID_russia
hCoV-19/Russia/KB-RII-MH52288S/2022	BA.1.1	2022-01-03	2022	Russia	Kabardino-Balkaria Republic	Kabardino-Balkaria Republic	GISAID_russia
hCoV-19/Russia/KB-RII-MH52291S/2022	BA.1.1	2022-01-11	2022	Russia	Kabardino-Balkaria Republic	Kabardino-Balkaria Republic	GISAID_russia
hCoV-19/Russia/KB-RII-MH52293S/2022	BA.1.1	2022-01-11	2022	Russia	Kabardino-Balkaria Republic	Kabardino-Balkaria Republic	GISAID_russia
hCoV-19/Russia/KB-RII-MH52296S/2022	BA.1	2022-01-01	2022	Russia	Kabardino-Balkaria Republic	Kabardino-Balkaria Republic	GISAID_russia
hCoV-19/Russia/KB-RII-MH52317S/2022	BA.1.1	2022-01-11	2022	Russia	Kabardino-Balkaria Republic	Kabardino-Balkaria Republic	GISAID_russia
hCoV-19/Russia/KB-RII-MH52324S/2022	BA.1.1	2022-01-14	2022	Russia	Kabardino-Balkaria Republic	Kabardino-Balkaria Republic	GISAID_russia
hCoV-19/Russia/KB-RII-MH52325S/2022	BA.1.1	2022-01-14	2022	Russia	Kabardino-Balkaria Republic	Kabardino-Balkaria Republic	GISAID_russia
hCoV-19/Russia/KB-RII-MH52326S/2022	BA.1.17	2022-01-14	2022	Russia	Kabardino-Balkaria Republic	Kabardino-Balkaria Republic	GISAID_russia
hCoV-19/Russia/KB-RII-MH52328S/2022	BA.1.1	2022-01-14	2022	Russia	Kabardino-Balkaria Republic	Kabardino-Balkaria Republic	GISAID_russia
hCoV-19/Russia/MAG-RII-MH54241S/2022	BA.1.1	2022-01-01	2022	Russia	Magadan Region	Magadan Region	GISAID_russia
hCoV-19/Russia/MAG-RII-MH54257S/2022	BA.1.1	2022-01-12	2022	Russia	Magadan Region	Magadan Region	GISAID_russia
hCoV-19/Russia/MO-RII-MH54261S/2022	BA.1.1	2022-01-17	2022	Russia	Republic of Mordovia	Republic of Mordovia	GISAID_russia
hCoV-19/Russia/MO-RII-MH54279S/2022	BA.1.1	2022-01-18	2022	Russia	Republic of Mordovia	Republic of Mordovia	GISAID_russia
hCoV-19/Russia/MO-RII-MH54284S/2022	BA.1.1	2022-01-17	2022	Russia	Republic of Mordovia	Republic of Mordovia	GISAID_russia
hCoV-19/Russia/MO-RII-MH54286S/2022	BA.1.1	2022-01-17	2022	Russia	Republic of Mordovia	Republic of Mordovia	GISAID_russia
hCoV-19/Russia/MO-RII-MH54292S/2022	BA.1.1	2022-01-17	2022	Russia	Republic of Mordovia	Republic of Mordovia	GISAID_russia
hCoV-19/Russia/MO-RII-MH54298S/2022	BA.1.14	2022-01-17	2022	Russia	Republic of Mordovia	Republic of Mordovia	GISAID_russia
hCoV-19/Russia/SPE-RII-10893S/2022	BA.1.1	2022-01-23	2022	Russia	Saint Petersburg	Saint Petersburg	GISAID_russia
hCoV-19/Russia/SPE-RII-10896S/2022	BA.1.1	2022-01-25	2022	Russia	Saint Petersburg	Saint Petersburg	GISAID_russia
hCoV-19/Russia/SPE-RII-10900S/2022	BA.1.1	2022-01-25	2022	Russia	Saint Petersburg	Saint Petersburg	GISAID_russia
hCoV-19/Russia/SPE-RII-10902S/2022	BA.1	2022-01-25	2022	Russia	Saint Petersburg	Saint Petersburg	GISAID_russia
hCoV-19/Russia/SPE-RII-10903S/2022	BA.1.1	2022-01-25	2022	Russia	Saint Petersburg	Saint Petersburg	GISAID_russia
hCoV-19/Russia/SPE-RII-10910S/2022	BA.1.17	2022-01-24	2022	Russia	Saint Petersburg	Saint Petersburg	GISAID_russia
hCoV-19/Russia/SPE-RII-10918S/2022	BA.1.1.1	2022-01-24	2022	Russia	Saint Petersburg	Saint Petersburg	GISAID_russia
hCoV-19/Russia/SPE-RII-10924S/2022	BA.1.13	2022-01-24	2022	Russia	Saint Petersburg	Saint Petersburg	GISAID_russia
hCoV-19/Russia/SPE-RII-10925S/2022	BA.1.1	2022-01-24	2022	Russia	Saint Petersburg	Saint Petersburg	GISAID_russia
hCoV-19/Russia/SPE-RII-10935S/2022	BA.1.1	2022-01-24	2022	Russia	Saint Petersburg	Saint Petersburg	GISAID_russia
hCoV-19/Russia/SPE-RII-10936S/2022	BA.1.1	2022-01-24	2022	Russia	Saint Petersburg	Saint Petersburg	GISAID_russia
hCoV-19/Russia/SPE-RII-10942S/2022	BA.1	2022-01-24	2022	Russia	Saint Petersburg	Saint Petersburg	GISAID_russia
hCoV-19/Russia/SPE-RII-10944S/2022	BA.1.1	2022-01-24	2022	Russia	Saint Petersburg	Saint Petersburg	GISAID_russia
hCoV-19/Russia/SPE-RII-10951S/2022	BA.1.1	2022-01-24	2022	Russia	Saint Petersburg	Saint Petersburg	GISAID_russia
hCoV-19/Russia/MO-RII-MH54303S/2022	BA.1.1	2022-01-17	2022	Russia	Republic of Mordovia	Republic of Mordovia	GISAID_russia
hCoV-19/Russia/ME-RII-MH56693S/2022	BA.1.1	2022-01-20	2022	Russia	Mari El Republic	Mari El Republic	GISAID_russia
hCoV-19/Russia/ME-RII-MH56703S/2022	BA.2	2022-01-19	2022	Russia	Mari El Republic	Mari El Republic	GISAID_russia
hCoV-19/Russia/ME-RII-MH56706S/2022	BA.2	2022-01-19	2022	Russia	Mari El Republic	Mari El Republic	GISAID_russia
hCoV-19/Russia/ME-RII-MH56710S/2022	BA.1	2022-01-19	2022	Russia	Mari El Republic	Mari El Republic	GISAID_russia
hCoV-19/Russia/ME-RII-MH56711S/2022	BA.2	2022-01-19	2022	Russia	Mari El Republic	Mari El Republic	GISAID_russia
hCoV-19/Russia/ME-RII-MH56713S/2022	BA.2	2022-01-19	2022	Russia	Mari El Republic	Mari El Republic	GISAID_russia
hCoV-19/Russia/ME-RII-MH56716S/2022	BA.2	2022-01-18	2022	Russia	Mari El Republic	Mari El Republic	GISAID_russia
hCoV-19/Russia/ME-RII-MH56718S/2022	BA.2	2022-01-19	2022	Russia	Mari El Republic	Mari El Republic	GISAID_russia
hCoV-19/Russia/ME-RII-MH56719S/2022	BA.2	2022-01-19	2022	Russia	Mari El Republic	Mari El Republic	GISAID_russia
hCoV-19/Russia/ME-RII-MH56720S/2022	BA.2	2022-01-19	2022	Russia	Mari El Republic	Mari El Republic	GISAID_russia
hCoV-19/Russia/ME-RII-MH56721S/2022	BA.2	2022-01-19	2022	Russia	Mari El Republic	Mari El Republic	GISAID_russia
hCoV-19/Russia/ME-RII-MH56722S/2022	BA.2	2022-01-19	2022	Russia	Mari El Republic	Mari El Republic	GISAID_russia
hCoV-19/Russia/ME-RII-MH56723S/2022	BA.2	2022-01-19	2022	Russia	Mari El Republic	Mari El Republic	GISAID_russia
hCoV-19/Russia/ME-RII-MH56724S/2022	BA.1.1	2022-01-19	2022	Russia	Mari El Republic	Mari El Republic	GISAID_russia
hCoV-19/Russia/ME-RII-MH56727S/2022	BA.1.1	2022-01-19	2022	Russia	Mari El Republic	Mari El Republic	GISAID_russia
hCoV-19/Russia/ME-RII-MH56729S/2022	BA.2	2022-01-19	2022	Russia	Mari El Republic	Mari El Republic	GISAID_russia
hCoV-19/Russia/ME-RII-MH56730S/2022	BA.2	2022-01-19	2022	Russia	Mari El Republic	Mari El Republic	GISAID_russia
hCoV-19/Russia/ME-RII-MH56731S/2022	BA.2	2022-01-19	2022	Russia	Mari El Republic	Mari El Republic	GISAID_russia
hCoV-19/Russia/ME-RII-MH56732S/2022	BA.2	2022-01-19	2022	Russia	Mari El Republic	Mari El Republic	GISAID_russia
hCoV-19/Russia/ME-RII-MH56734S/2022	BA.2	2022-01-20	2022	Russia	Mari El Republic	Mari El Republic	GISAID_russia
hCoV-19/Russia/ME-RII-MH56735S/2022	BA.2	2022-01-20	2022	Russia	Mari El Republic	Mari El Republic	GISAID_russia
hCoV-19/Russia/ME-RII-MH56736S/2022	BA.1.1	2022-01-19	2022	Russia	Mari El Republic	Mari El Republic	GISAID_russia
hCoV-19/Russia/ME-RII-MH56737S/2022	BA.1.1	2022-01-19	2022	Russia	Mari El Republic	Mari El Republic	GISAID_russia
hCoV-19/Russia/ME-RII-MH56738S/2022	BA.2	2022-01-19	2022	Russia	Mari El Republic	Mari El Republic	GISAID_russia
hCoV-19/Russia/ME-RII-MH56739S/2022	BA.1.1	2022-01-19	2022	Russia	Mari El Republic	Mari El Republic	GISAID_russia
hCoV-19/Russia/ME-RII-MH56740S/2022	BA.1.1	2022-01-19	2022	Russia	Mari El Republic	Mari El Republic	GISAID_russia
hCoV-19/Russia/ME-RII-MH56742S/2022	BA.1.1	2022-01-19	2022	Russia	Mari El Republic	Mari El Republic	GISAID_russia
hCoV-19/Russia/ME-RII-MH56744S/2022	BA.1.1	2022-01-19	2022	Russia	Mari El Republic	Mari El Republic	GISAID_russia
hCoV-19/Russia/ME-RII-MH56746S/2022	BA.1.1	2022-01-19	2022	Russia	Mari El Republic	Mari El Republic	GISAID_russia
hCoV-19/Russia/KLU-RII-MH57500S/2022	BA.1.1	2022-01-21	2022	Russia	Kaluga Region	Kaluga Region	GISAID_russia
hCoV-19/Russia/KLU-RII-MH57501S/2022	BA.1.1	2022-01-21	2022	Russia	Kaluga Region	Kaluga Region	GISAID_russia
hCoV-19/Russia/KLU-RII-MH57508S/2022	BA.1.1	2022-01-20	2022	Russia	Kaluga Region	Kaluga Region	GISAID_russia
hCoV-19/Russia/KLU-RII-MH57510S/2022	BA.1.1	2022-01-20	2022	Russia	Kaluga Region	Kaluga Region	GISAID_russia
hCoV-19/Russia/KLU-RII-MH57511S/2022	BA.1	2022-01-20	2022	Russia	Kaluga Region	Kaluga Region	GISAID_russia
hCoV-19/Russia/KLU-RII-MH57516S/2022	BA.1.1	2022-01-20	2022	Russia	Kaluga Region	Kaluga Region	GISAID_russia
hCoV-19/Russia/KLU-RII-MH57517S/2022	BA.1.1	2022-01-20	2022	Russia	Kaluga Region	Kaluga Region	GISAID_russia
hCoV-19/Russia/KLU-RII-MH57520S/2022	BA.1.1	2022-01-20	2022	Russia	Kaluga Region	Kaluga Region	GISAID_russia
hCoV-19/Russia/KLU-RII-MH57522S/2022	BA.1.1	2022-01-22	2022	Russia	Kaluga Region	Kaluga Region	GISAID_russia
hCoV-19/Russia/KLU-RII-MH57536S/2022	BA.1.1	2022-01-22	2022	Russia	Kaluga Region	Kaluga Region	GISAID_russia
hCoV-19/Russia/KLU-RII-MH57537S/2022	BA.1.15	2022-01-22	2022	Russia	Kaluga Region	Kaluga Region	GISAID_russia
hCoV-19/Russia/KLU-RII-MH57542S/2022	BA.1.1	2022-01-19	2022	Russia	Kaluga Region	Kaluga Region	GISAID_russia
hCoV-19/Russia/KLU-RII-MH57543S/2022	BA.1.1	2022-01-19	2022	Russia	Kaluga Region	Kaluga Region	GISAID_russia
hCoV-19/Russia/KLU-RII-MH57544S/2022	BA.1.1	2022-01-22	2022	Russia	Kaluga Region	Kaluga Region	GISAID_russia
hCoV-19/Russia/KLU-RII-MH57545S/2022	BA.1.1	2022-01-19	2022	Russia	Kaluga Region	Kaluga Region	GISAID_russia
hCoV-19/Russia/KLU-RII-MH57560S/2022	BA.2	2022-01-19	2022	Russia	Kaluga Region	Kaluga Region	GISAID_russia
hCoV-19/Russia/KLU-RII-MH57561S/2022	BA.1.17	2022-01-19	2022	Russia	Kaluga Region	Kaluga Region	GISAID_russia
hCoV-19/Russia/KLU-RII-MH57569S/2022	BA.1.1	2022-01-20	2022	Russia	Kaluga Region	Kaluga Region	GISAID_russia
hCoV-19/Russia/KLU-RII-MH57577S/2022	BA.1.1	2022-01-19	2022	Russia	Kaluga Region	Kaluga Region	GISAID_russia
hCoV-19/Russia/KLU-RII-MH57593S/2022	BA.1.1	2022-01-19	2022	Russia	Kaluga Region	Kaluga Region	GISAID_russia
hCoV-19/Russia/KLU-RII-MH57616S/2022	BA.2	2022-01-19	2022	Russia	Kaluga Region	Kaluga Region	GISAID_russia
hCoV-19/Russia/KLU-RII-MH57626S/2022	BA.1.1	2022-01-20	2022	Russia	Kaluga Region	Kaluga Region	GISAID_russia
hCoV-19/Russia/KLU-RII-MH57627S/2022	BA.1.1	2022-01-20	2022	Russia	Kaluga Region	Kaluga Region	GISAID_russia
hCoV-19/Russia/KLU-RII-MH57638S/2022	BA.1.1	2022-01-17	2022	Russia	Kaluga Region	Kaluga Region	GISAID_russia
hCoV-19/Russia/KLU-RII-MH57657S/2022	BA.1.1	2022-01-18	2022	Russia	Kaluga Region	Kaluga Region	GISAID_russia
hCoV-19/Russia/KLU-RII-MH57658S/2022	BA.1.1	2022-01-18	2022	Russia	Kaluga Region	Kaluga Region	GISAID_russia
hCoV-19/Russia/KLU-RII-MH57661S/2022	BA.1.1	2022-01-18	2022	Russia	Kaluga Region	Kaluga Region	GISAID_russia
hCoV-19/Russia/KLU-RII-MH57662S/2022	BA.1.1	2022-01-17	2022	Russia	Kaluga Region	Kaluga Region	GISAID_russia
hCoV-19/Russia/KLU-RII-MH57668S/2022	BA.2	2022-01-17	2022	Russia	Kaluga Region	Kaluga Region	GISAID_russia
hCoV-19/Russia/KLU-RII-MH57669S/2022	BA.2	2022-01-17	2022	Russia	Kaluga Region	Kaluga Region	GISAID_russia
hCoV-19/Russia/KLU-RII-MH57670S/2022	BA.2	2022-01-17	2022	Russia	Kaluga Region	Kaluga Region	GISAID_russia
hCoV-19/Russia/KLU-RII-MH57672S/2022	BA.1.1.15	2022-01-18	2022	Russia	Kaluga Region	Kaluga Region	GISAID_russia
hCoV-19/Russia/KLU-RII-MH57674S/2022	BA.1	2022-01-17	2022	Russia	Kaluga Region	Kaluga Region	GISAID_russia
hCoV-19/Russia/RYA-RII-MH57710S/2022	BA.1.15	2022-01-13	2022	Russia	Ryazan Region	Ryazan Region	GISAID_russia
hCoV-19/Russia/RYA-RII-MH57712S/2022	BA.1.17	2022-01-12	2022	Russia	Ryazan Region	Ryazan Region	GISAID_russia
hCoV-19/Russia/RYA-RII-MH57714S/2022	BA.1.17	2022-01-12	2022	Russia	Ryazan Region	Ryazan Region	GISAID_russia
hCoV-19/Russia/RYA-RII-MH57716S/2022	BA.1.17	2022-01-12	2022	Russia	Ryazan Region	Ryazan Region	GISAID_russia
hCoV-19/Russia/RYA-RII-MH57717S/2022	BA.1.1	2022-01-13	2022	Russia	Ryazan Region	Ryazan Region	GISAID_russia
hCoV-19/Russia/RYA-RII-MH57719S/2022	BA.1.1	2022-01-13	2022	Russia	Ryazan Region	Ryazan Region	GISAID_russia
hCoV-19/Russia/RYA-RII-MH57720S/2022	BA.1.15	2022-01-13	2022	Russia	Ryazan Region	Ryazan Region	GISAID_russia
hCoV-19/Russia/RYA-RII-MH57722S/2022	BA.1.1	2022-01-13	2022	Russia	Ryazan Region	Ryazan Region	GISAID_russia
hCoV-19/Russia/RYA-RII-MH57723S/2022	BA.1	2022-01-13	2022	Russia	Ryazan Region	Ryazan Region	GISAID_russia
hCoV-19/Russia/RYA-RII-MH57726S/2022	BA.1.1	2022-01-13	2022	Russia	Ryazan Region	Ryazan Region	GISAID_russia
hCoV-19/Russia/RYA-RII-MH57728S/2022	BA.1.1	2022-01-13	2022	Russia	Ryazan Region	Ryazan Region	GISAID_russia
hCoV-19/Russia/RYA-RII-MH57729S/2022	BA.1	2022-01-13	2022	Russia	Ryazan Region	Ryazan Region	GISAID_russia
hCoV-19/Russia/RYA-RII-MH57730S/2022	BA.1.1	2022-01-13	2022	Russia	Ryazan Region	Ryazan Region	GISAID_russia
hCoV-19/Russia/RYA-RII-MH57734S/2022	BA.1.1	2022-01-13	2022	Russia	Ryazan Region	Ryazan Region	GISAID_russia
hCoV-19/Russia/RYA-RII-MH57735S/2022	BA.1.1	2022-01-13	2022	Russia	Ryazan Region	Ryazan Region	GISAID_russia
hCoV-19/Russia/RYA-RII-MH57738S/2022	BA.1.15	2022-01-12	2022	Russia	Ryazan Region	Ryazan Region	GISAID_russia
hCoV-19/Russia/RYA-RII-MH57740S/2022	BA.1.1	2022-01-12	2022	Russia	Ryazan Region	Ryazan Region	GISAID_russia
hCoV-19/Russia/RYA-RII-MH57741S/2022	BA.1.1	2022-01-12	2022	Russia	Ryazan Region	Ryazan Region	GISAID_russia
hCoV-19/Russia/RYA-RII-MH57743S/2022	BA.1.1	2022-01-12	2022	Russia	Ryazan Region	Ryazan Region	GISAID_russia
hCoV-19/Russia/RYA-RII-MH57745S/2022	BA.1.1	2022-01-12	2022	Russia	Ryazan Region	Ryazan Region	GISAID_russia
hCoV-19/Russia/RYA-RII-MH57750S/2022	BA.1	2022-01-12	2022	Russia	Ryazan Region	Ryazan Region	GISAID_russia
hCoV-19/Russia/RYA-RII-MH57761S/2022	BA.1.1	2022-01-11	2022	Russia	Ryazan Region	Ryazan Region	GISAID_russia
hCoV-19/Russia/RYA-RII-MH57767S/2022	BA.1	2022-01-12	2022	Russia	Ryazan Region	Ryazan Region	GISAID_russia
hCoV-19/Russia/RYA-RII-MH57770S/2022	BA.1.1	2022-01-11	2022	Russia	Ryazan Region	Ryazan Region	GISAID_russia
hCoV-19/Russia/RYA-RII-MH57772S/2022	BA.1.1	2022-01-12	2022	Russia	Ryazan Region	Ryazan Region	GISAID_russia
hCoV-19/Russia/RYA-RII-MH57773S/2022	BA.1.15	2022-01-13	2022	Russia	Ryazan Region	Ryazan Region	GISAID_russia
hCoV-19/Russia/RYA-RII-MH57774S/2022	BA.1	2022-01-13	2022	Russia	Ryazan Region	Ryazan Region	GISAID_russia
hCoV-19/Russia/RYA-RII-MH57775S/2022	BA.1	2022-01-12	2022	Russia	Ryazan Region	Ryazan Region	GISAID_russia
hCoV-19/Russia/RYA-RII-MH57782S/2022	BA.1	2022-01-14	2022	Russia	Ryazan Region	Ryazan Region	GISAID_russia
hCoV-19/Russia/RYA-RII-MH57783S/2022	BA.1	2022-01-14	2022	Russia	Ryazan Region	Ryazan Region	GISAID_russia
hCoV-19/Russia/IVA-RII-MH57809S/2022	BA.2	2022-01-19	2022	Russia	Ivanovo Region	Ivanovo Region	GISAID_russia
hCoV-19/Russia/IVA-RII-MH57810S/2022	BA.1.1	2022-01-18	2022	Russia	Ivanovo Region	Ivanovo Region	GISAID_russia
hCoV-19/Russia/IVA-RII-MH57811S/2022	BA.1.1	2022-01-19	2022	Russia	Ivanovo Region	Ivanovo Region	GISAID_russia
hCoV-19/Russia/IVA-RII-MH57813S/2022	BA.1.17	2022-01-18	2022	Russia	Ivanovo Region	Ivanovo Region	GISAID_russia
hCoV-19/Russia/IVA-RII-MH57814S/2022	BA.1.17	2022-01-18	2022	Russia	Ivanovo Region	Ivanovo Region	GISAID_russia
hCoV-19/Russia/IVA-RII-MH57815S/2022	BA.1.1	2022-01-18	2022	Russia	Ivanovo Region	Ivanovo Region	GISAID_russia
hCoV-19/Russia/IVA-RII-MH57816S/2022	BA.1.1	2022-01-18	2022	Russia	Ivanovo Region	Ivanovo Region	GISAID_russia
hCoV-19/Russia/IVA-RII-MH57817S/2022	BA.1.15	2022-01-18	2022	Russia	Ivanovo Region	Ivanovo Region	GISAID_russia
hCoV-19/Russia/IVA-RII-MH57818S/2022	BA.1.1	2022-01-17	2022	Russia	Ivanovo Region	Ivanovo Region	GISAID_russia
hCoV-19/Russia/IVA-RII-MH57820S/2022	BA.1	2022-01-17	2022	Russia	Ivanovo Region	Ivanovo Region	GISAID_russia
hCoV-19/Russia/IVA-RII-MH57821S/2022	BA.1.1	2022-01-18	2022	Russia	Ivanovo Region	Ivanovo Region	GISAID_russia
hCoV-19/Russia/IVA-RII-MH57822S/2022	BA.1.1	2022-01-18	2022	Russia	Ivanovo Region	Ivanovo Region	GISAID_russia
hCoV-19/Russia/IVA-RII-MH57823S/2022	BA.1.17	2022-01-18	2022	Russia	Ivanovo Region	Ivanovo Region	GISAID_russia
hCoV-19/Russia/IVA-RII-MH57824S/2022	BA.1.1	2022-01-18	2022	Russia	Ivanovo Region	Ivanovo Region	GISAID_russia
hCoV-19/Russia/IVA-RII-MH57833S/2022	BA.1.1	2022-01-17	2022	Russia	Ivanovo Region	Ivanovo Region	GISAID_russia
hCoV-19/Russia/IVA-RII-MH57836S/2022	BA.1.17	2022-01-18	2022	Russia	Ivanovo Region	Ivanovo Region	GISAID_russia
hCoV-19/Russia/IVA-RII-MH57844S/2022	BA.1.1	2022-01-19	2022	Russia	Ivanovo Region	Ivanovo Region	GISAID_russia
hCoV-19/Russia/IVA-RII-MH57848S/2022	BA.1.15	2022-01-19	2022	Russia	Ivanovo Region	Ivanovo Region	GISAID_russia
hCoV-19/Russia/IVA-RII-MH57850S/2022	BA.1.15	2022-01-20	2022	Russia	Ivanovo Region	Ivanovo Region	GISAID_russia
hCoV-19/Russia/IVA-RII-MH57851S/2022	BA.1.1	2022-01-20	2022	Russia	Ivanovo Region	Ivanovo Region	GISAID_russia
hCoV-19/Russia/IVA-RII-MH57854S/2022	BA.1.1	2022-01-19	2022	Russia	Ivanovo Region	Ivanovo Region	GISAID_russia
hCoV-19/Russia/IVA-RII-MH57856S/2022	BA.1.17	2022-01-21	2022	Russia	Ivanovo Region	Ivanovo Region	GISAID_russia
hCoV-19/Russia/IVA-RII-MH57857S/2022	BA.1.1	2022-01-21	2022	Russia	Ivanovo Region	Ivanovo Region	GISAID_russia
hCoV-19/Russia/IVA-RII-MH57860S/2022	BA.1.1	2022-01-21	2022	Russia	Ivanovo Region	Ivanovo Region	GISAID_russia
hCoV-19/Russia/IVA-RII-MH57866S/2022	BA.1.1	2022-01-20	2022	Russia	Ivanovo Region	Ivanovo Region	GISAID_russia
hCoV-19/Russia/IVA-RII-MH57872S/2022	BA.1.1	2022-01-20	2022	Russia	Ivanovo Region	Ivanovo Region	GISAID_russia
hCoV-19/Russia/IVA-RII-MH57873S/2022	BA.1.1	2022-01-21	2022	Russia	Ivanovo Region	Ivanovo Region	GISAID_russia
hCoV-19/Russia/IVA-RII-MH57875S/2022	BA.1.1	2022-01-21	2022	Russia	Ivanovo Region	Ivanovo Region	GISAID_russia
Russia/LQ-21538_S277/2022	BA.1.1	2022-01-16	2022	Russia	Moscow	Moscow	FMBA_russia
Russia/LQ-21543_S278/2022	BA.1.1	2022-01-17	2022	Russia	Moscow	Moscow	FMBA_russia
Russia/LQ-21577_S204/2022	BA.1.1	2022-01-17	2022	Russia	Moscow	Moscow	FMBA_russia
Russia/LQ-21578_S205/2022	BA.1.1.1	2022-01-17	2022	Russia	Moscow	Moscow	FMBA_russia
Russia/LQ-21753_S184/2022	BA.2	2022-01-18	2022	Russia	Moscow	Moscow	FMBA_russia
Russia/LQ-21754_S185/2022	BA.2	2022-01-18	2022	Russia	Moscow	Moscow	FMBA_russia
Russia/LQ-21760_S1/2022	BA.1	2022-01-18	2022	Russia	Moscow	Moscow	FMBA_russia
Russia/LQ-21767_S186/2022	BA.2	2022-01-18	2022	Russia	Moscow	Moscow	FMBA_russia
Russia/LQ-21768_S187/2022	BA.2	2022-01-18	2022	Russia	Moscow	Moscow	FMBA_russia
Russia/LQ-21804_S3/2022	BA.1.1	2022-01-18	2022	Russia	Moscow	Moscow	FMBA_russia
Russia/LQ-21811_S188/2022	BA.2	2022-01-18	2022	Russia	Moscow	Moscow	FMBA_russia
Russia/LQ-21858_S189/2022	BA.2	2022-01-19	2022	Russia	Moscow	Moscow	FMBA_russia
Russia/LQ-21863_S190/2022	BA.2	2022-01-19	2022	Russia	Moscow	Moscow	FMBA_russia
Russia/LQ-21865_S6/2022	BA.1	2022-01-19	2022	Russia	Moscow	Moscow	FMBA_russia
Russia/LQ-21868_S8/2022	BA.1.1	2022-01-19	2022	Russia	Moscow	Moscow	FMBA_russia
Russia/LQ-21871_S9/2022	B.1.1.529	2022-01-19	2022	Russia	Moscow	Moscow	FMBA_russia
Russia/LQ-21874_S10/2022	BA.1.1	2022-01-19	2022	Russia	Moscow	Moscow	FMBA_russia
Russia/LQ-21880_S11/2022	BA.1.1	2022-01-19	2022	Russia	Moscow	Moscow	FMBA_russia
Russia/LQ-21884_S12/2022	BA.1.1	2022-01-19	2022	Russia	Moscow	Moscow	FMBA_russia
Russia/LQ-21885_S13/2022	BA.1.15	2022-01-19	2022	Russia	Moscow	Moscow	FMBA_russia
Russia/LQ-21901_S15/2022	BA.1	2022-01-19	2022	Russia	Moscow	Moscow	FMBA_russia
Russia/LQ-21903_S16/2022	BA.1.15	2022-01-19	2022	Russia	Moscow	Moscow	FMBA_russia
Russia/LQ-21917_S17/2022	BA.1	2022-01-19	2022	Russia	Moscow	Moscow	FMBA_russia
Russia/LQ-21922_S18/2022	BA.1	2022-01-20	2022	Russia	Moscow	Moscow	FMBA_russia
Russia/LQ-21925_S19/2022	BA.1.1	2022-01-20	2022	Russia	Moscow	Moscow	FMBA_russia
Russia/LQ-21928_S20/2022	BA.1	2022-01-20	2022	Russia	Moscow	Moscow	FMBA_russia
Russia/LQ-21932_S21/2022	BA.1	2022-01-20	2022	Russia	Moscow	Moscow	FMBA_russia
Russia/LQ-21937_S22/2022	BA.1.1	2022-01-20	2022	Russia	Moscow	Moscow	FMBA_russia
Russia/LQ-21940_S191/2022	BA.2	2022-01-20	2022	Russia	Moscow	Moscow	FMBA_russia
Russia/LQ-21943_S23/2022	BA.1.1	2022-01-20	2022	Russia	Moscow	Moscow	FMBA_russia
Russia/LQ-21953_S24/2022	BA.1	2022-01-20	2022	Russia	Moscow	Moscow	FMBA_russia
Russia/LQ-21954_S25/2022	BA.1.1	2022-01-20	2022	Russia	Moscow	Moscow	FMBA_russia
Russia/LQ-21955_S26/2022	BA.1.17	2022-01-20	2022	Russia	Moscow	Moscow	FMBA_russia
Russia/LQ-21966_S27/2022	BA.1.15	2022-01-20	2022	Russia	Moscow	Moscow	FMBA_russia
Russia/LQ-21968_S28/2022	BA.1.1	2022-01-20	2022	Russia	Moscow	Moscow	FMBA_russia
Russia/LQ-21974_S29/2022	BA.1.1	2022-01-20	2022	Russia	Moscow	Moscow	FMBA_russia
Russia/LQ-21975_S30/2022	BA.1.1	2022-01-20	2022	Russia	Moscow	Moscow	FMBA_russia
Russia/LQ-21977_S31/2022	BA.1.17	2022-01-20	2022	Russia	Moscow	Moscow	FMBA_russia
Russia/LQ-21979_S32/2022	BA.1.1	2022-01-20	2022	Russia	Moscow	Moscow	FMBA_russia
Russia/LQ-21987_S33/2022	BA.1.15	2022-01-20	2022	Russia	Moscow	Moscow	FMBA_russia
Russia/LQ-21998_S34/2022	BA.1.1	2022-01-20	2022	Russia	Moscow	Moscow	FMBA_russia
Russia/LQ-22002_S35/2022	BA.1.1	2022-01-20	2022	Russia	Moscow	Moscow	FMBA_russia
Russia/LQ-22007_S36/2022	BA.1.1	2022-01-20	2022	Russia	Moscow	Moscow	FMBA_russia
Russia/LQ-22018_S37/2022	BA.1.1	2022-01-20	2022	Russia	Moscow	Moscow	FMBA_russia
Russia/LQ-22025_S192/2022	BA.2	2022-01-20	2022	Russia	Moscow	Moscow	FMBA_russia
Russia/LQ-22033_S39/2022	BA.1.1	2022-01-20	2022	Russia	Moscow	Moscow	FMBA_russia
Russia/LQ-22034_S40/2022	BA.1.1	2022-01-20	2022	Russia	Moscow	Moscow	FMBA_russia
Russia/LQ-22036_S41/2022	BA.1.1	2022-01-20	2022	Russia	Moscow	Moscow	FMBA_russia
Russia/LQ-22045_S42/2022	BA.1.14	2022-01-20	2022	Russia	Moscow	Moscow	FMBA_russia
Russia/LQ-22083_S43/2022	BA.1.1	2022-01-20	2022	Russia	Moscow	Moscow	FMBA_russia
Russia/LQ-22089_S44/2022	BA.1	2022-01-20	2022	Russia	Moscow	Moscow	FMBA_russia
Russia/LQ-22090_S45/2022	BA.1.1	2022-01-20	2022	Russia	Moscow	Moscow	FMBA_russia
Russia/LQ-22094_S46/2022	BA.1.1	2022-01-20	2022	Russia	Moscow	Moscow	FMBA_russia
Russia/LQ-22097_S47/2022	BA.1.17	2022-01-20	2022	Russia	Moscow	Moscow	FMBA_russia
Russia/LQ-22100_S48/2022	BA.1	2022-01-20	2022	Russia	Moscow	Moscow	FMBA_russia
Russia/LQ-22109_S49/2022	BA.1.1	2022-01-20	2022	Russia	Moscow	Moscow	FMBA_russia
Russia/LQ-22115_S50/2022	BA.1.17	2022-01-20	2022	Russia	Moscow	Moscow	FMBA_russia
Russia/LQ-22116_S51/2022	BA.1.17	2022-01-20	2022	Russia	Moscow	Moscow	FMBA_russia
Russia/LQ-22132_S52/2022	BA.1.1	2022-01-21	2022	Russia	Moscow	Moscow	FMBA_russia
Russia/LQ-22139_S55/2022	BA.1.14	2022-01-21	2022	Russia	Moscow	Moscow	FMBA_russia
Russia/LQ-22145_S57/2022	BA.1.15	2022-01-21	2022	Russia	Moscow	Moscow	FMBA_russia
Russia/LQ-22147_S58/2022	B.1.1	2022-01-21	2022	Russia	Moscow	Moscow	FMBA_russia
Russia/LQ-22152_S60/2022	BA.1.1	2022-01-21	2022	Russia	Moscow	Moscow	FMBA_russia
Russia/LQ-22155_S61/2022	BA.1.17	2022-01-21	2022	Russia	Moscow	Moscow	FMBA_russia
Russia/LQ-22160_S62/2022	BA.1.1	2022-01-21	2022	Russia	Moscow	Moscow	FMBA_russia
Russia/LQ-22170_S63/2022	BA.1	2022-01-21	2022	Russia	Moscow	Moscow	FMBA_russia
Russia/LQ-22172_S64/2022	BA.1.1	2022-01-21	2022	Russia	Moscow	Moscow	FMBA_russia
Russia/LQ-22173_S65/2022	BA.1.1	2022-01-21	2022	Russia	Moscow	Moscow	FMBA_russia
Russia/LQ-22180_S66/2022	BA.1.1	2022-01-21	2022	Russia	Moscow	Moscow	FMBA_russia
Russia/LQ-22181_S67/2022	BA.1.17	2022-01-21	2022	Russia	Moscow	Moscow	FMBA_russia
Russia/LQ-22183_S68/2022	BA.1.1	2022-01-21	2022	Russia	Moscow	Moscow	FMBA_russia
Russia/LQ-22201_S227/2022	BA.1.1	2022-01-21	2022	Russia	Moscow	Moscow	FMBA_russia
Russia/LQ-22217_S69/2022	BA.1.1	2022-01-21	2022	Russia	Moscow	Moscow	FMBA_russia
Russia/LQ-22224_S70/2022	BA.1.1	2022-01-21	2022	Russia	Moscow	Moscow	FMBA_russia
Russia/LQ-22231_S71/2022	BA.1.1	2022-01-21	2022	Russia	Moscow	Moscow	FMBA_russia
Russia/LQ-22239_S72/2022	BA.1	2022-01-21	2022	Russia	Moscow	Moscow	FMBA_russia
Russia/LQ-22241_S73/2022	BA.1.1	2022-01-21	2022	Russia	Moscow	Moscow	FMBA_russia
Russia/LQ-22250_S74/2022	BA.1	2022-01-21	2022	Russia	Moscow	Moscow	FMBA_russia
Russia/LQ-22253_S75/2022	BA.1.1	2022-01-21	2022	Russia	Moscow	Moscow	FMBA_russia
Russia/LQ-22260_S76/2022	BA.1.17	2022-01-22	2022	Russia	Moscow	Moscow	FMBA_russia
Russia/LQ-22263_S77/2022	BA.1.1	2022-01-22	2022	Russia	Moscow	Moscow	FMBA_russia
Russia/LQ-22264_S78/2022	BA.1.1	2022-01-22	2022	Russia	Moscow	Moscow	FMBA_russia
Russia/LQ-22270_S79/2022	BA.1.1	2022-01-22	2022	Russia	Moscow	Moscow	FMBA_russia
Russia/LQ-22271_S80/2022	BA.1.1	2022-01-22	2022	Russia	Moscow	Moscow	FMBA_russia
Russia/LQ-22274_S81/2022	BA.1.1.15	2022-01-22	2022	Russia	Moscow	Moscow	FMBA_russia
Russia/LQ-22277_S82/2022	BA.1.14	2022-01-22	2022	Russia	Moscow	Moscow	FMBA_russia
Russia/LQ-22280_S83/2022	BA.1.1	2022-01-22	2022	Russia	Moscow	Moscow	FMBA_russia
Russia/LQ-22284_S84/2022	BA.1.1	2022-01-22	2022	Russia	Moscow	Moscow	FMBA_russia
Russia/LQ-22297_S85/2022	BA.1.1	2022-01-22	2022	Russia	Moscow	Moscow	FMBA_russia
Russia/LQ-22300_S86/2022	BA.1	2022-01-22	2022	Russia	Moscow	Moscow	FMBA_russia
Russia/LQ-22302_S87/2022	BA.1.1	2022-01-22	2022	Russia	Moscow	Moscow	FMBA_russia
Russia/LQ-22309_S88/2022	BA.1.1	2022-01-22	2022	Russia	Moscow	Moscow	FMBA_russia
Russia/LQ-22314_S89/2022	BA.1.1	2022-01-22	2022	Russia	Moscow	Moscow	FMBA_russia
Russia/LQ-22316_S90/2022	BA.2	2022-01-22	2022	Russia	Moscow	Moscow	FMBA_russia
Russia/LQ-22321_S91/2022	BA.1.1	2022-01-22	2022	Russia	Moscow	Moscow	FMBA_russia
Russia/LQ-22324_S241/2022	BA.1	2022-01-22	2022	Russia	Moscow	Moscow	FMBA_russia
Russia/LQ-22327_S92/2022	BA.1.14	2022-01-22	2022	Russia	Moscow	Moscow	FMBA_russia
Russia/LQ-22331_S93/2022	BA.2	2022-01-22	2022	Russia	Moscow	Moscow	FMBA_russia
Russia/LQ-22334_S94/2022	BA.1.1	2022-01-22	2022	Russia	Moscow	Moscow	FMBA_russia
Russia/LQ-22336_S243/2022	BA.1	2022-01-22	2022	Russia	Moscow	Moscow	FMBA_russia
Russia/LQ-22345_S95/2022	BA.1	2022-01-22	2022	Russia	Moscow	Moscow	FMBA_russia
Russia/LQ-22347_S96/2022	BA.1.1.14	2022-01-22	2022	Russia	Moscow	Moscow	FMBA_russia
Russia/LQ-22348_S97/2022	BA.1.1	2022-01-22	2022	Russia	Moscow	Moscow	FMBA_russia
Russia/LQ-22351_S98/2022	BA.1	2022-01-22	2022	Russia	Moscow	Moscow	FMBA_russia
Russia/LQ-22354_S99/2022	BA.1	2022-01-22	2022	Russia	Moscow	Moscow	FMBA_russia
Russia/LQ-22364_S100/2022	BA.1.15	2022-01-22	2022	Russia	Moscow	Moscow	FMBA_russia
Russia/LQ-22365_S101/2022	BA.2	2022-01-22	2022	Russia	Moscow	Moscow	FMBA_russia
Russia/LQ-22367_S102/2022	BA.2	2022-01-22	2022	Russia	Moscow	Moscow	FMBA_russia
Russia/LQ-22373_S103/2022	BA.1.1	2022-01-22	2022	Russia	Moscow	Moscow	FMBA_russia
Russia/LQ-22376_S104/2022	BA.1.1.1	2022-01-22	2022	Russia	Moscow	Moscow	FMBA_russia
Russia/LQ-22378_S105/2022	BA.1.1	2022-01-22	2022	Russia	Moscow	Moscow	FMBA_russia
Russia/LQ-22382_S106/2022	BA.1	2022-01-22	2022	Russia	Moscow	Moscow	FMBA_russia
Russia/LQ-22384_S107/2022	B.1.1	2022-01-22	2022	Russia	Moscow	Moscow	FMBA_russia
Russia/LQ-22385_S108/2022	BA.1	2022-01-22	2022	Russia	Moscow	Moscow	FMBA_russia
Russia/LQ-22390_S110/2022	BA.1.17	2022-01-22	2022	Russia	Moscow	Moscow	FMBA_russia
Russia/LQ-22392_S111/2022	BA.1.1	2022-01-22	2022	Russia	Moscow	Moscow	FMBA_russia
Russia/LQ-22394_S112/2022	BA.1.1	2022-01-22	2022	Russia	Moscow	Moscow	FMBA_russia
Russia/LQ-22396_S113/2022	BA.2	2022-01-22	2022	Russia	Moscow	Moscow	FMBA_russia
Russia/LQ-22430_S120/2022	BA.1	2022-01-22	2022	Russia	Moscow	Moscow	FMBA_russia
Russia/LQ-22432_S121/2022	BA.1	2022-01-22	2022	Russia	Moscow	Moscow	FMBA_russia
Russia/LQ-22433_S122/2022	BA.1.15	2022-01-22	2022	Russia	Moscow	Moscow	FMBA_russia
Russia/LQ-22435_S123/2022	BA.2	2022-01-22	2022	Russia	Moscow	Moscow	FMBA_russia
Russia/LQ-22439_S124/2022	BA.1	2022-01-22	2022	Russia	Moscow	Moscow	FMBA_russia
Russia/LQ-22443_S125/2022	BA.1.1	2022-01-22	2022	Russia	Moscow	Moscow	FMBA_russia
Russia/LQ-22446_S127/2022	BA.1	2022-01-22	2022	Russia	Moscow	Moscow	FMBA_russia
Russia/LQ-22449_S128/2022	BA.1	2022-01-22	2022	Russia	Moscow	Moscow	FMBA_russia
Russia/LQ-22452_S129/2022	BA.1.1	2022-01-23	2022	Russia	Moscow	Moscow	FMBA_russia
Russia/LQ-22466_S130/2022	BA.1.1	2022-01-23	2022	Russia	Moscow	Moscow	FMBA_russia
Russia/LQ-22470_S193/2022	BA.2	2022-01-23	2022	Russia	Moscow	Moscow	FMBA_russia
Russia/LQ-22477_S131/2022	BA.1.1	2022-01-23	2022	Russia	Moscow	Moscow	FMBA_russia
Russia/LQ-22481_S132/2022	BA.1.15	2022-01-23	2022	Russia	Moscow	Moscow	FMBA_russia
Russia/LQ-22483_S133/2022	BA.1.1	2022-01-23	2022	Russia	Moscow	Moscow	FMBA_russia
Russia/LQ-22484_S134/2022	BA.1.15	2022-01-23	2022	Russia	Moscow	Moscow	FMBA_russia
Russia/LQ-22494_S135/2022	BA.1.15	2022-01-23	2022	Russia	Moscow	Moscow	FMBA_russia
Russia/LQ-22506_S194/2022	BA.2	2022-01-23	2022	Russia	Moscow	Moscow	FMBA_russia
Russia/LQ-22519_S136/2022	BA.1.1	2022-01-23	2022	Russia	Moscow	Moscow	FMBA_russia
Russia/LQ-22521_S137/2022	BA.1.1	2022-01-23	2022	Russia	Moscow	Moscow	FMBA_russia
Russia/LQ-22526_S138/2022	BA.1.1	2022-01-23	2022	Russia	Moscow	Moscow	FMBA_russia
Russia/LQ-22527_S139/2022	BA.1.1	2022-01-23	2022	Russia	Moscow	Moscow	FMBA_russia
Russia/LQ-22528_S195/2022	BA.1.1	2022-01-23	2022	Russia	Moscow	Moscow	FMBA_russia
Russia/LQ-22530_S140/2022	BA.1	2022-01-23	2022	Russia	Moscow	Moscow	FMBA_russia
Russia/LQ-22536_S141/2022	BA.1.1	2022-01-23	2022	Russia	Moscow	Moscow	FMBA_russia
Russia/LQ-22537_S142/2022	BA.1.15	2022-01-23	2022	Russia	Moscow	Moscow	FMBA_russia
Russia/LQ-22538_S143/2022	BA.1.1	2022-01-23	2022	Russia	Moscow	Moscow	FMBA_russia
Russia/LQ-22543_S144/2022	BA.1.1	2022-01-23	2022	Russia	Moscow	Moscow	FMBA_russia
Russia/LQ-22545_S145/2022	BA.1	2022-01-23	2022	Russia	Moscow	Moscow	FMBA_russia
Russia/LQ-22546_S146/2022	BA.1.17	2022-01-23	2022	Russia	Moscow	Moscow	FMBA_russia
Russia/LQ-22553_S147/2022	BA.1.15	2022-01-23	2022	Russia	Moscow	Moscow	FMBA_russia
Russia/LQ-22554_S148/2022	BA.1.1	2022-01-23	2022	Russia	Moscow	Moscow	FMBA_russia
Russia/LQ-22559_S149/2022	BA.1.1	2022-01-23	2022	Russia	Moscow	Moscow	FMBA_russia
Russia/LQ-22561_S150/2022	BA.1.1	2022-01-23	2022	Russia	Moscow	Moscow	FMBA_russia
Russia/LQ-22571_S151/2022	BA.1.1	2022-01-23	2022	Russia	Moscow	Moscow	FMBA_russia
Russia/LQ-22572_S152/2022	BA.1.1	2022-01-23	2022	Russia	Moscow	Moscow	FMBA_russia
Russia/LQ-22576_S153/2022	BA.2	2022-01-23	2022	Russia	Moscow	Moscow	FMBA_russia
Russia/LQ-22596_S154/2022	BA.2	2022-01-23	2022	Russia	Moscow	Moscow	FMBA_russia
Russia/LQ-22603_S155/2022	BA.1.1	2022-01-23	2022	Russia	Moscow	Moscow	FMBA_russia
Russia/LQ-22605_S156/2022	BA.1.1	2022-01-23	2022	Russia	Moscow	Moscow	FMBA_russia
Russia/LQ-22609_S157/2022	BA.1.1	2022-01-23	2022	Russia	Moscow	Moscow	FMBA_russia
Russia/LQ-22626_S158/2022	BA.2	2022-01-23	2022	Russia	Moscow	Moscow	FMBA_russia
Russia/LQ-22628_S159/2022	BA.1	2022-01-23	2022	Russia	Moscow	Moscow	FMBA_russia
Russia/LQ-22633_S160/2022	BA.1.1	2022-01-23	2022	Russia	Moscow	Moscow	FMBA_russia
Russia/LQ-22635_S161/2022	BA.1.1	2022-01-23	2022	Russia	Moscow	Moscow	FMBA_russia
Russia/LQ-22641_S162/2022	BA.1	2022-01-23	2022	Russia	Moscow	Moscow	FMBA_russia
Russia/LQ-22642_S163/2022	BA.1.17	2022-01-23	2022	Russia	Moscow	Moscow	FMBA_russia
Russia/LQ-22646_S164/2022	BA.1	2022-01-23	2022	Russia	Moscow	Moscow	FMBA_russia
Russia/LQ-22654_S165/2022	B.1	2022-01-23	2022	Russia	Moscow	Moscow	FMBA_russia
Russia/LQ-22655_S166/2022	BA.1.1	2022-01-23	2022	Russia	Moscow	Moscow	FMBA_russia
Russia/LQ-22656_S167/2022	BA.1.1	2022-01-23	2022	Russia	Moscow	Moscow	FMBA_russia
Russia/LQ-22657_S168/2022	BA.1	2022-01-23	2022	Russia	Moscow	Moscow	FMBA_russia
Russia/LQ-22659_S169/2022	BA.2	2022-01-23	2022	Russia	Moscow	Moscow	FMBA_russia
Russia/LQ-22664_S170/2022	BA.1.1	2022-01-23	2022	Russia	Moscow	Moscow	FMBA_russia
Russia/LQ-22665_S171/2022	BA.1.1	2022-01-23	2022	Russia	Moscow	Moscow	FMBA_russia
Russia/LQ-22666_S172/2022	BA.2	2022-01-23	2022	Russia	Moscow	Moscow	FMBA_russia
Russia/LQ-22667_S173/2022	BA.1.1	2022-01-23	2022	Russia	Moscow	Moscow	FMBA_russia
Russia/LQ-22668_S174/2022	BA.1.1	2022-01-23	2022	Russia	Moscow	Moscow	FMBA_russia
Russia/LQ-22670_S175/2022	BA.1.1	2022-01-23	2022	Russia	Moscow	Moscow	FMBA_russia
Russia/LQ-22672_S176/2022	BA.1.1	2022-01-23	2022	Russia	Moscow	Moscow	FMBA_russia
Russia/LQ-22674_S177/2022	BA.1.1	2022-01-23	2022	Russia	Moscow	Moscow	FMBA_russia
Russia/LQ-22682_S178/2022	BA.2	2022-01-23	2022	Russia	Moscow	Moscow	FMBA_russia
Russia/LQ-22685_S179/2022	BA.1.1	2022-01-23	2022	Russia	Moscow	Moscow	FMBA_russia
Russia/LQ-22692_S180/2022	BA.1.1	2022-01-23	2022	Russia	Moscow	Moscow	FMBA_russia
Russia/LQ-22693_S181/2022	BA.1.1	2022-01-23	2022	Russia	Moscow	Moscow	FMBA_russia
Russia/LQ-22695_S182/2022	BA.1.14	2022-01-23	2022	Russia	Moscow	Moscow	FMBA_russia
Russia/LQ-22714_S276/2022	BA.1.1	2022-01-23	2022	Russia	Moscow	Moscow	FMBA_russia
Russia/LQ-22840_S279/2022	BA.1.1	2022-01-26	2022	Russia	Moscow	Moscow	FMBA_russia
Russia/LQ-22847_S280/2022	BA.1	2022-01-26	2022	Russia	Moscow	Moscow	FMBA_russia
Russia/LQ-22884_S281/2022	BA.1.1	2022-01-26	2022	Russia	Moscow	Moscow	FMBA_russia
Russia/LQ-22885_S282/2022	BA.1	2022-01-26	2022	Russia	Moscow	Moscow	FMBA_russia
Russia/LQ-22888_S283/2022	BA.1.17	2022-01-26	2022	Russia	Moscow	Moscow	FMBA_russia
Russia/LQ-22902_S284/2022	BA.2	2022-01-26	2022	Russia	Moscow	Moscow	FMBA_russia
Russia/LQ-22946_S196/2022	BA.2	2022-01-26	2022	Russia	Moscow	Moscow	FMBA_russia
Russia/LQ-22951_S285/2022	BA.1.1	2022-01-26	2022	Russia	Moscow	Moscow	FMBA_russia
Russia/LQ-22970_S286/2022	BA.1.17	2022-01-26	2022	Russia	Moscow	Moscow	FMBA_russia
Russia/LQ-22984_S287/2022	BA.1	2022-01-26	2022	Russia	Moscow	Moscow	FMBA_russia
Russia/LQ-22985_S288/2022	BA.1	2022-01-26	2022	Russia	Moscow	Moscow	FMBA_russia
Russia/LQ-22993_S289/2022	BA.1.1	2022-01-26	2022	Russia	Moscow	Moscow	FMBA_russia
Russia/LQ-23004_S197/2022	BA.2	2022-01-26	2022	Russia	Moscow	Moscow	FMBA_russia
Russia/LQ-23007_S198/2022	BA.2	2022-01-26	2022	Russia	Moscow	Moscow	FMBA_russia
Russia/LQ-23027_S290/2022	BA.1	2022-01-26	2022	Russia	Moscow	Moscow	FMBA_russia
Russia/LQ-23030_S291/2022	BA.1.1	2022-01-26	2022	Russia	Moscow	Moscow	FMBA_russia
Russia/LQ-23035_S292/2022	BA.1.1	2022-01-26	2022	Russia	Moscow	Moscow	FMBA_russia
Russia/LQ-23061_S293/2022	BA.2	2022-01-26	2022	Russia	Moscow	Moscow	FMBA_russia
Russia/LQ-23066_S294/2022	B.1.1.529	2022-01-26	2022	Russia	Moscow	Moscow	FMBA_russia
Russia/LQ-23067_S295/2022	BA.1.1	2022-01-26	2022	Russia	Moscow	Moscow	FMBA_russia
Russia/LQ-23072_S296/2022	BA.1.17	2022-01-26	2022	Russia	Moscow	Moscow	FMBA_russia
Russia/LQ-23075_S297/2022	BA.1.17	2022-01-26	2022	Russia	Moscow	Moscow	FMBA_russia
Russia/LQ-23076_S298/2022	BA.1	2022-01-26	2022	Russia	Moscow	Moscow	FMBA_russia
Russia/LQ-23080_S299/2022	BA.1	2022-01-26	2022	Russia	Moscow	Moscow	FMBA_russia
Russia/LQ-23082_S300/2022	BA.1.1	2022-01-26	2022	Russia	Moscow	Moscow	FMBA_russia
Russia/LQ-23093_S301/2022	BA.1.1	2022-01-26	2022	Russia	Moscow	Moscow	FMBA_russia
Russia/LQ-23095_S302/2022	BA.1.1	2022-01-26	2022	Russia	Moscow	Moscow	FMBA_russia
Russia/LQ-23104_S303/2022	BA.1	2022-01-26	2022	Russia	Moscow	Moscow	FMBA_russia
Russia/LQ-23112_S304/2022	BA.1.15	2022-01-26	2022	Russia	Moscow	Moscow	FMBA_russia
Russia/LQ-23115_S305/2022	BA.1.17	2022-01-26	2022	Russia	Moscow	Moscow	FMBA_russia
Russia/LQ-23118_S306/2022	BA.1	2022-01-26	2022	Russia	Moscow	Moscow	FMBA_russia
Russia/LQ-23121_S199/2022	BA.2	2022-01-26	2022	Russia	Moscow	Moscow	FMBA_russia
Russia/LQ-23122_S307/2022	BA.2	2022-01-26	2022	Russia	Moscow	Moscow	FMBA_russia
Russia/LQ-23125_S308/2022	BA.1.1	2022-01-26	2022	Russia	Moscow	Moscow	FMBA_russia
Russia/LQ-23126_S309/2022	BA.1.1	2022-01-26	2022	Russia	Moscow	Moscow	FMBA_russia
Russia/LQ-23131_S310/2022	BA.1.1	2022-01-26	2022	Russia	Moscow	Moscow	FMBA_russia
Russia/LQ-23137_S311/2022	BA.1.1	2022-01-26	2022	Russia	Moscow	Moscow	FMBA_russia
Russia/LQ-23138_S312/2022	BA.1.1	2022-01-26	2022	Russia	Moscow	Moscow	FMBA_russia
Russia/LQ-23140_S313/2022	BA.1.15	2022-01-26	2022	Russia	Moscow	Moscow	FMBA_russia
Russia/LQ-23141_S314/2022	BA.1	2022-01-26	2022	Russia	Moscow	Moscow	FMBA_russia
Russia/LQ-23144_S315/2022	BA.1.17	2022-01-26	2022	Russia	Moscow	Moscow	FMBA_russia
Russia/LQ-23145_S316/2022	BA.1.1	2022-01-26	2022	Russia	Moscow	Moscow	FMBA_russia
Russia/LQ-23147_S317/2022	BA.1.1	2022-01-26	2022	Russia	Moscow	Moscow	FMBA_russia
Russia/LQ-23149_S318/2022	BA.1.1	2022-01-26	2022	Russia	Moscow	Moscow	FMBA_russia
Russia/LQ-23153_S319/2022	BA.1	2022-01-26	2022	Russia	Moscow	Moscow	FMBA_russia
Russia/LQ-23155_S320/2022	BA.1	2022-01-26	2022	Russia	Moscow	Moscow	FMBA_russia
Russia/LQ-23156_S200/2022	BA.2	2022-01-26	2022	Russia	Moscow	Moscow	FMBA_russia
Russia/LQ-23161_S321/2022	BA.1.1	2022-01-26	2022	Russia	Moscow	Moscow	FMBA_russia
Russia/LQ-23163_S322/2022	BA.1	2022-01-26	2022	Russia	Moscow	Moscow	FMBA_russia
Russia/LQ-23165_S323/2022	BA.1.1	2022-01-26	2022	Russia	Moscow	Moscow	FMBA_russia
Russia/LQ-23167_S324/2022	BA.1	2022-01-26	2022	Russia	Moscow	Moscow	FMBA_russia
Russia/LQ-23177_S325/2022	BA.1.1	2022-01-26	2022	Russia	Moscow	Moscow	FMBA_russia
Russia/LQ-23178_S326/2022	BA.2	2022-01-26	2022	Russia	Moscow	Moscow	FMBA_russia
Russia/LQ-23182_S327/2022	BA.1.14	2022-01-26	2022	Russia	Moscow	Moscow	FMBA_russia
Russia/LQ-23185_S328/2022	BA.1	2022-01-26	2022	Russia	Moscow	Moscow	FMBA_russia
Russia/LQ-23198_S329/2022	BA.1.15	2022-01-26	2022	Russia	Moscow	Moscow	FMBA_russia
Russia/LQ-23204_S330/2022	BA.1	2022-01-26	2022	Russia	Moscow	Moscow	FMBA_russia
Russia/LQ-23215_S331/2022	BA.1.1	2022-01-29	2022	Russia	Moscow	Moscow	FMBA_russia
Russia/LQ-23224_S332/2022	BA.1.1	2022-01-29	2022	Russia	Moscow	Moscow	FMBA_russia
Russia/LQ-23226_S333/2022	BA.1.1	2022-01-29	2022	Russia	Moscow	Moscow	FMBA_russia
Russia/LQ-23227_S334/2022	BA.2	2022-01-29	2022	Russia	Moscow	Moscow	FMBA_russia
Russia/LQ-23228_S335/2022	BA.1.1	2022-01-29	2022	Russia	Moscow	Moscow	FMBA_russia
Russia/LQ-23234_S336/2022	BA.1	2022-01-29	2022	Russia	Moscow	Moscow	FMBA_russia
Russia/LQ-23248_S337/2022	BA.1	2022-01-29	2022	Russia	Moscow	Moscow	FMBA_russia
Russia/LQ-23252_S338/2022	BA.1	2022-01-29	2022	Russia	Moscow	Moscow	FMBA_russia
Russia/LQ-23268_S339/2022	BA.1	2022-01-29	2022	Russia	Moscow	Moscow	FMBA_russia
Russia/LQ-23271_S340/2022	BA.1.1	2022-01-29	2022	Russia	Moscow	Moscow	FMBA_russia
Russia/LQ-23274_S341/2022	BA.1.1	2022-01-29	2022	Russia	Moscow	Moscow	FMBA_russia
Russia/LQ-23276_S342/2022	BA.1	2022-01-29	2022	Russia	Moscow	Moscow	FMBA_russia
Russia/LQ-23279_S343/2022	BA.1.1	2022-01-29	2022	Russia	Moscow	Moscow	FMBA_russia
Russia/LQ-23281_S344/2022	BA.1.1	2022-01-29	2022	Russia	Moscow	Moscow	FMBA_russia
Russia/LQ-23283_S345/2022	BA.1.1	2022-01-29	2022	Russia	Moscow	Moscow	FMBA_russia
Russia/LQ-23284_S346/2022	BA.1.1	2022-01-29	2022	Russia	Moscow	Moscow	FMBA_russia
Russia/LQ-23289_S347/2022	BA.1.1	2022-01-29	2022	Russia	Moscow	Moscow	FMBA_russia
Russia/LQ-23299_S348/2022	BA.1.1	2022-01-29	2022	Russia	Moscow	Moscow	FMBA_russia
Russia/LQ-23316_S349/2022	BA.1.1	2022-01-29	2022	Russia	Moscow	Moscow	FMBA_russia
Russia/LQ-23344_S350/2022	BA.2	2022-01-29	2022	Russia	Moscow	Moscow	FMBA_russia
Russia/LQ-23367_S351/2022	BA.1.17	2022-01-29	2022	Russia	Moscow	Moscow	FMBA_russia
Russia/LQ-23400_S352/2022	BA.1	2022-01-29	2022	Russia	Moscow	Moscow	FMBA_russia
Russia/LQ-23409_S353/2022	BA.1.1	2022-01-29	2022	Russia	Moscow	Moscow	FMBA_russia
Russia/LQ-23414_S354/2022	BA.1.1	2022-01-29	2022	Russia	Moscow	Moscow	FMBA_russia
Russia/LQ-23416_S355/2022	BA.1.1	2022-01-29	2022	Russia	Moscow	Moscow	FMBA_russia
Russia/LQ-23443_S356/2022	BA.1	2022-01-29	2022	Russia	Moscow	Moscow	FMBA_russia
Russia/LQ-23453_S357/2022	BA.2	2022-01-29	2022	Russia	Moscow	Moscow	FMBA_russia
Russia/LQ-23456_S201/2022	BA.2	2022-01-29	2022	Russia	Moscow	Moscow	FMBA_russia
Russia/LQ-23460_S358/2022	BA.1.1	2022-01-29	2022	Russia	Moscow	Moscow	FMBA_russia
Russia/LQ-23476_S202/2022	BA.2	2022-01-29	2022	Russia	Moscow	Moscow	FMBA_russia
Russia/LQ-23507_S359/2022	BA.1.1	2022-01-29	2022	Russia	Moscow	Moscow	FMBA_russia
Russia/LQ-23509_S360/2022	BA.2	2022-01-29	2022	Russia	Moscow	Moscow	FMBA_russia
Russia/LQ-23510_S361/2022	BA.1.1	2022-01-29	2022	Russia	Moscow	Moscow	FMBA_russia
Russia/LQ-23533_S362/2022	BA.1.1	2022-01-30	2022	Russia	Moscow	Moscow	FMBA_russia
Russia/LQ-23543_S363/2022	BA.1.1	2022-01-30	2022	Russia	Moscow	Moscow	FMBA_russia
Russia/LQ-23549_S364/2022	BA.1.1	2022-01-30	2022	Russia	Moscow	Moscow	FMBA_russia
Russia/LQ-23552_S203/2022	BA.2	2022-01-30	2022	Russia	Moscow	Moscow	FMBA_russia
Russia/LQ-23553_S365/2022	BA.1.1	2022-01-30	2022	Russia	Moscow	Moscow	FMBA_russia
Russia/LQ-23556_S366/2022	BA.1.1	2022-01-30	2022	Russia	Moscow	Moscow	FMBA_russia
Russia/LQ-23566_S367/2022	BA.1.15	2022-01-30	2022	Russia	Moscow	Moscow	FMBA_russia
Russia/LQ-23567_S368/2022	BA.1.1	2022-01-30	2022	Russia	Moscow	Moscow	FMBA_russia
Russia/LQ-23574_S369/2022	BA.1.1	2022-01-30	2022	Russia	Moscow	Moscow	FMBA_russia
Russia/LQ-23578_S370/2022	BA.1.1	2022-01-30	2022	Russia	Moscow	Moscow	FMBA_russia
Russia/LQ-23581_S371/2022	BA.2	2022-01-30	2022	Russia	Moscow	Moscow	FMBA_russia
Russia/LQ-23587_S216/2022	BA.1.1	2022-01-30	2022	Russia	Moscow	Moscow	FMBA_russia
Russia/LQ-23589_S217/2022	BA.1.1	2022-01-30	2022	Russia	Moscow	Moscow	FMBA_russia
Russia/LQ-23591_S218/2022	BA.1.1	2022-01-30	2022	Russia	Moscow	Moscow	FMBA_russia
Russia/LQ-23596_S219/2022	BA.2	2022-01-30	2022	Russia	Moscow	Moscow	FMBA_russia
Russia/LQ-23600_S220/2022	BA.1	2022-01-30	2022	Russia	Moscow	Moscow	FMBA_russia
Russia/LQ-23604_S221/2022	BA.1.1.1	2022-01-30	2022	Russia	Moscow	Moscow	FMBA_russia
Russia/LQ-23611_S222/2022	BA.1.1	2022-01-30	2022	Russia	Moscow	Moscow	FMBA_russia
Russia/LQ-23622_S223/2022	BA.1.1	2022-01-30	2022	Russia	Moscow	Moscow	FMBA_russia
Russia/LQ-23624_S224/2022	BA.1.1	2022-01-30	2022	Russia	Moscow	Moscow	FMBA_russia
Russia/LQ-23627_S225/2022	BA.1.1	2022-01-30	2022	Russia	Moscow	Moscow	FMBA_russia
Russia/LQ-23630_S226/2022	BA.1.1	2022-01-30	2022	Russia	Moscow	Moscow	FMBA_russia
Russia/LQ-23647_S228/2022	BA.1.1	2022-01-30	2022	Russia	Moscow	Moscow	FMBA_russia
Russia/LQ-23650_S229/2022	BA.1.14	2022-01-30	2022	Russia	Moscow	Moscow	FMBA_russia
Russia/LQ-23651_S206/2022	BA.2	2022-01-30	2022	Russia	Moscow	Moscow	FMBA_russia
Russia/LQ-23653_S230/2022	BA.1.1	2022-01-30	2022	Russia	Moscow	Moscow	FMBA_russia
Russia/LQ-23654_S231/2022	BA.1.15	2022-01-30	2022	Russia	Moscow	Moscow	FMBA_russia
Russia/LQ-23658_S232/2022	BA.1.1	2022-01-30	2022	Russia	Moscow	Moscow	FMBA_russia
Russia/LQ-23659_S233/2022	BA.1.1	2022-01-30	2022	Russia	Moscow	Moscow	FMBA_russia
Russia/LQ-23664_S234/2022	BA.2	2022-01-30	2022	Russia	Moscow	Moscow	FMBA_russia
Russia/LQ-23673_S207/2022	BA.2	2022-01-30	2022	Russia	Moscow	Moscow	FMBA_russia
Russia/LQ-23695_S236/2022	BA.1.1	2022-01-30	2022	Russia	Moscow	Moscow	FMBA_russia
Russia/LQ-23696_S208/2022	BA.1.1	2022-01-30	2022	Russia	Moscow	Moscow	FMBA_russia
Russia/LQ-23699_S209/2022	BA.1.17	2022-01-30	2022	Russia	Moscow	Moscow	FMBA_russia
Russia/LQ-23700_S237/2022	BA.1.1	2022-01-30	2022	Russia	Moscow	Moscow	FMBA_russia
Russia/LQ-23702_S238/2022	BA.1.1	2022-01-30	2022	Russia	Moscow	Moscow	FMBA_russia
Russia/LQ-23707_S210/2022	BA.1.1	2022-01-30	2022	Russia	Moscow	Moscow	FMBA_russia
Russia/LQ-23713_S239/2022	BA.1.1	2022-01-30	2022	Russia	Moscow	Moscow	FMBA_russia
Russia/LQ-23716_S211/2022	BA.1	2022-01-30	2022	Russia	Moscow	Moscow	FMBA_russia
Russia/LQ-23717_S240/2022	BA.1.1	2022-01-30	2022	Russia	Moscow	Moscow	FMBA_russia
Russia/LQ-23729_S242/2022	BA.1	2022-01-30	2022	Russia	Moscow	Moscow	FMBA_russia
Russia/LQ-23739_S244/2022	BA.2	2022-01-30	2022	Russia	Moscow	Moscow	FMBA_russia
Russia/LQ-23740_S245/2022	BA.1.1	2022-01-30	2022	Russia	Moscow	Moscow	FMBA_russia
Russia/LQ-23753_S246/2022	BA.1.1	2022-01-30	2022	Russia	Moscow	Moscow	FMBA_russia
Russia/LQ-23754_S247/2022	BA.1.1	2022-01-30	2022	Russia	Moscow	Moscow	FMBA_russia
Russia/LQ-23758_S248/2022	BA.1.1	2022-01-30	2022	Russia	Moscow	Moscow	FMBA_russia
Russia/LQ-23764_S249/2022	BA.1.1	2022-01-30	2022	Russia	Moscow	Moscow	FMBA_russia
Russia/LQ-23772_S212/2022	BA.1.1	2022-01-30	2022	Russia	Moscow	Moscow	FMBA_russia
Russia/LQ-23774_S250/2022	BA.1.1	2022-01-30	2022	Russia	Moscow	Moscow	FMBA_russia
Russia/LQ-23820_S251/2022	BA.2	2022-01-30	2022	Russia	Moscow	Moscow	FMBA_russia
Russia/LQ-23822_S252/2022	BA.2	2022-01-30	2022	Russia	Moscow	Moscow	FMBA_russia
Russia/LQ-23825_S253/2022	BA.1.1	2022-01-30	2022	Russia	Moscow	Moscow	FMBA_russia
Russia/LQ-23827_S254/2022	BA.2	2022-01-30	2022	Russia	Moscow	Moscow	FMBA_russia
Russia/LQ-23836_S255/2022	BA.2	2022-01-30	2022	Russia	Moscow	Moscow	FMBA_russia
Russia/LQ-23843_S256/2022	BA.1.1	2022-01-30	2022	Russia	Moscow	Moscow	FMBA_russia
Russia/LQ-23846_S257/2022	BA.1.6	2022-01-30	2022	Russia	Moscow	Moscow	FMBA_russia
Russia/LQ-23854_S258/2022	BA.1.1	2022-01-30	2022	Russia	Moscow	Moscow	FMBA_russia
Russia/LQ-23862_S213/2022	BA.1.1	2022-01-30	2022	Russia	Moscow	Moscow	FMBA_russia
Russia/LQ-23864_S259/2022	BA.1.1	2022-01-30	2022	Russia	Moscow	Moscow	FMBA_russia
Russia/LQ-23865_S260/2022	BA.2	2022-01-30	2022	Russia	Moscow	Moscow	FMBA_russia
Russia/LQ-23871_S261/2022	BA.1.1	2022-01-30	2022	Russia	Moscow	Moscow	FMBA_russia
Russia/LQ-23873_S262/2022	BA.1.1	2022-01-30	2022	Russia	Moscow	Moscow	FMBA_russia
Russia/LQ-23899_S214/2022	BA.2	2022-01-30	2022	Russia	Moscow	Moscow	FMBA_russia
Russia/LQ-23900_S263/2022	BA.1.1	2022-01-30	2022	Russia	Moscow	Moscow	FMBA_russia
Russia/LQ-23902_S264/2022	BA.1.1	2022-01-30	2022	Russia	Moscow	Moscow	FMBA_russia
Russia/LQ-23909_S265/2022	BA.1.1	2022-01-30	2022	Russia	Moscow	Moscow	FMBA_russia
Russia/LQ-23930_S266/2022	BA.1.1	2022-01-30	2022	Russia	Moscow	Moscow	FMBA_russia
Russia/LQ-23933_S267/2022	BA.2	2022-01-30	2022	Russia	Moscow	Moscow	FMBA_russia
Russia/LQ-23937_S268/2022	BA.1.1	2022-01-30	2022	Russia	Moscow	Moscow	FMBA_russia
Russia/LQ-23940_S269/2022	BA.1.1	2022-01-30	2022	Russia	Moscow	Moscow	FMBA_russia
Russia/LQ-23942_S270/2022	BA.1.17	2022-01-30	2022	Russia	Moscow	Moscow	FMBA_russia
Russia/LQ-23944_S271/2022	BA.1.1	2022-01-30	2022	Russia	Moscow	Moscow	FMBA_russia
Russia/LQ-23945_S272/2022	BA.1	2022-01-30	2022	Russia	Moscow	Moscow	FMBA_russia
Russia/LQ-23947_S273/2022	BA.1.1	2022-01-30	2022	Russia	Moscow	Moscow	FMBA_russia
Russia/LQ-23949_S274/2022	BA.1.1	2022-01-30	2022	Russia	Moscow	Moscow	FMBA_russia
Russia/LQ-23950_S275/2022	BA.1.1	2022-01-30	2022	Russia	Moscow	Moscow	FMBA_russia
Russia/RZD-266_S183/2022	BA.2	2022-01-18	2022	Russia	Moscow	Moscow	FMBA_russia
Russia/RZD-295_S215/2022	BA.2	2022-01-19	2022	Russia	Moscow	Moscow	FMBA_russia
Russia/LQ-20972_S1/2022	BA.1.1	2022-01-04	2022	Russia	Moscow	Moscow	FMBA_russia
Russia/LQ-20973_S76/2022	BA.1.1	2022-01-04	2022	Russia	Moscow	Moscow	FMBA_russia
Russia/LQ-20975_S77/2022	BA.1.17	2022-01-04	2022	Russia	Moscow	Moscow	FMBA_russia
Russia/LQ-20976_S2/2022	BA.1.1	2022-01-04	2022	Russia	Moscow	Moscow	FMBA_russia
Russia/LQ-20977_S3/2022	BA.1.17	2022-01-04	2022	Russia	Moscow	Moscow	FMBA_russia
Russia/LQ-20981_S4/2022	BA.1.1	2022-01-04	2022	Russia	Moscow	Moscow	FMBA_russia
Russia/LQ-20984_S5/2022	BA.1	2022-01-04	2022	Russia	Moscow	Moscow	FMBA_russia
Russia/LQ-20985_S6/2022	BA.1.17	2022-01-04	2022	Russia	Moscow	Moscow	FMBA_russia
Russia/LQ-20986_S7/2022	BA.1	2022-01-04	2022	Russia	Moscow	Moscow	FMBA_russia
Russia/LQ-20991_S78/2022	BA.1.17	2022-01-04	2022	Russia	Moscow	Moscow	FMBA_russia
Russia/LQ-20992_S9/2022	BA.1.17	2022-01-04	2022	Russia	Moscow	Moscow	FMBA_russia
Russia/LQ-20993_S10/2022	BA.1	2022-01-04	2022	Russia	Moscow	Moscow	FMBA_russia
Russia/LQ-21001_S11/2022	BA.1	2022-01-08	2022	Russia	Moscow	Moscow	FMBA_russia
Russia/LQ-21002_S12/2022	BA.1	2022-01-08	2022	Russia	Moscow	Moscow	FMBA_russia
Russia/LQ-21005_S13/2022	BA.1	2022-01-08	2022	Russia	Moscow	Moscow	FMBA_russia
Russia/LQ-21009_S14/2022	BA.1.1	2022-01-08	2022	Russia	Moscow	Moscow	FMBA_russia
Russia/LQ-21011_S15/2022	BA.1.15	2022-01-08	2022	Russia	Moscow	Moscow	FMBA_russia
Russia/LQ-21012_S16/2022	BA.1	2022-01-08	2022	Russia	Moscow	Moscow	FMBA_russia
Russia/LQ-21013_S17/2022	B.1.1.529	2022-01-08	2022	Russia	Moscow	Moscow	FMBA_russia
Russia/LQ-21014_S18/2022	BA.1.1	2022-01-08	2022	Russia	Moscow	Moscow	FMBA_russia
Russia/LQ-21016_S19/2022	BA.1	2022-01-08	2022	Russia	Moscow	Moscow	FMBA_russia
Russia/LQ-21021_S20/2022	BA.1.1	2022-01-08	2022	Russia	Moscow	Moscow	FMBA_russia
Russia/LQ-21024_S21/2022	BA.1.14	2022-01-08	2022	Russia	Moscow	Moscow	FMBA_russia
Russia/LQ-21027_S22/2022	BA.1.17	2022-01-08	2022	Russia	Moscow	Moscow	FMBA_russia
Russia/LQ-21031_S23/2022	BA.1.1	2022-01-08	2022	Russia	Moscow	Moscow	FMBA_russia
Russia/LQ-21032_S24/2022	BA.1.1	2022-01-08	2022	Russia	Moscow	Moscow	FMBA_russia
Russia/LQ-21033_S79/2022	BA.1.1	2022-01-08	2022	Russia	Moscow	Moscow	FMBA_russia
Russia/LQ-21034_S80/2022	BA.1.1	2022-01-08	2022	Russia	Moscow	Moscow	FMBA_russia
Russia/LQ-21036_S25/2022	BA.1.1	2022-01-08	2022	Russia	Moscow	Moscow	FMBA_russia
Russia/LQ-21037_S26/2022	BA.1.17	2022-01-08	2022	Russia	Moscow	Moscow	FMBA_russia
Russia/LQ-21040_S27/2022	BA.1	2022-01-08	2022	Russia	Moscow	Moscow	FMBA_russia
Russia/LQ-21045_S28/2022	BA.1.1	2022-01-09	2022	Russia	Moscow	Moscow	FMBA_russia
Russia/LQ-21047_S81/2022	BA.1.1	2022-01-09	2022	Russia	Moscow	Moscow	FMBA_russia
Russia/LQ-21053_S29/2022	BA.1.1	2022-01-09	2022	Russia	Moscow	Moscow	FMBA_russia
Russia/LQ-21056_S30/2022	BA.1.1	2022-01-09	2022	Russia	Moscow	Moscow	FMBA_russia
Russia/LQ-21058_S31/2022	BA.1.1	2022-01-09	2022	Russia	Moscow	Moscow	FMBA_russia
Russia/LQ-21063_S32/2022	BA.1	2022-01-09	2022	Russia	Moscow	Moscow	FMBA_russia
Russia/LQ-21075_S33/2022	BA.1	2022-01-09	2022	Russia	Moscow	Moscow	FMBA_russia
Russia/LQ-21079_S34/2022	BA.1.1.15	2022-01-09	2022	Russia	Moscow	Moscow	FMBA_russia
Russia/LQ-21093_S82/2022	BA.1.1	2022-01-09	2022	Russia	Moscow	Moscow	FMBA_russia
Russia/LQ-21095_S35/2022	BA.1.1	2022-01-09	2022	Russia	Moscow	Moscow	FMBA_russia
Russia/LQ-21096_S36/2022	BA.1.17	2022-01-11	2022	Russia	Moscow	Moscow	FMBA_russia
Russia/LQ-21098_S37/2022	BA.1	2022-01-11	2022	Russia	Moscow	Moscow	FMBA_russia
Russia/LQ-21101_S40/2022	BA.1	2022-01-11	2022	Russia	Moscow	Moscow	FMBA_russia
Russia/LQ-21103_S41/2022	BA.1.15	2022-01-11	2022	Russia	Moscow	Moscow	FMBA_russia
Russia/LQ-21106_S42/2022	BA.1.1	2022-01-11	2022	Russia	Moscow	Moscow	FMBA_russia
Russia/LQ-21108_S83/2022	BA.1.1.1	2022-01-11	2022	Russia	Moscow	Moscow	FMBA_russia
Russia/LQ-21109_S44/2022	BA.1.1	2022-01-11	2022	Russia	Moscow	Moscow	FMBA_russia
Russia/LQ-21110_S45/2022	BA.1.1	2022-01-11	2022	Russia	Moscow	Moscow	FMBA_russia
Russia/LQ-21111_S46/2022	BA.1.17	2022-01-11	2022	Russia	Moscow	Moscow	FMBA_russia
Russia/LQ-21112_S84/2022	BA.1.1	2022-01-11	2022	Russia	Moscow	Moscow	FMBA_russia
Russia/LQ-21114_S47/2022	BA.1	2022-01-11	2022	Russia	Moscow	Moscow	FMBA_russia
Russia/LQ-21115_S48/2022	BA.1.1	2022-01-11	2022	Russia	Moscow	Moscow	FMBA_russia
Russia/LQ-21118_S85/2022	BA.1.1	2022-01-11	2022	Russia	Moscow	Moscow	FMBA_russia
Russia/LQ-21119_S86/2022	BA.1.1	2022-01-11	2022	Russia	Moscow	Moscow	FMBA_russia
Russia/LQ-21121_S49/2022	BA.1.1	2022-01-11	2022	Russia	Moscow	Moscow	FMBA_russia
Russia/LQ-21122_S50/2022	BA.1.1	2022-01-11	2022	Russia	Moscow	Moscow	FMBA_russia
Russia/LQ-21123_S51/2022	BA.1.17	2022-01-11	2022	Russia	Moscow	Moscow	FMBA_russia
Russia/LQ-21124_S52/2022	BA.1	2022-01-11	2022	Russia	Moscow	Moscow	FMBA_russia
Russia/LQ-21130_S53/2022	BA.1.1	2022-01-11	2022	Russia	Moscow	Moscow	FMBA_russia
Russia/LQ-21135_S54/2022	BA.1	2022-01-11	2022	Russia	Moscow	Moscow	FMBA_russia
Russia/LQ-21138_S55/2022	BA.1.1	2022-01-11	2022	Russia	Moscow	Moscow	FMBA_russia
Russia/LQ-21141_S87/2022	BA.1.1	2022-01-11	2022	Russia	Moscow	Moscow	FMBA_russia
Russia/LQ-21143_S56/2022	BA.1.1	2022-01-11	2022	Russia	Moscow	Moscow	FMBA_russia
Russia/LQ-21147_S57/2022	BA.1.1.15	2022-01-11	2022	Russia	Moscow	Moscow	FMBA_russia
Russia/LQ-21152_S58/2022	BA.1.15	2022-01-11	2022	Russia	Moscow	Moscow	FMBA_russia
Russia/LQ-21156_S88/2022	BA.1.17	2022-01-11	2022	Russia	Moscow	Moscow	FMBA_russia
Russia/LQ-21160_S59/2022	BA.1	2022-01-11	2022	Russia	Moscow	Moscow	FMBA_russia
Russia/LQ-21162_S60/2022	BA.1.1	2022-01-11	2022	Russia	Moscow	Moscow	FMBA_russia
Russia/LQ-21163_S61/2022	BA.1.1	2022-01-11	2022	Russia	Moscow	Moscow	FMBA_russia
Russia/LQ-21167_S62/2022	BA.1	2022-01-11	2022	Russia	Moscow	Moscow	FMBA_russia
Russia/LQ-21170_S64/2022	BA.1	2022-01-11	2022	Russia	Moscow	Moscow	FMBA_russia
Russia/LQ-21173_S66/2022	BA.1.17	2022-01-11	2022	Russia	Moscow	Moscow	FMBA_russia
Russia/LQ-21174_S67/2022	BA.1.1	2022-01-11	2022	Russia	Moscow	Moscow	FMBA_russia
Russia/LQ-21176_S68/2022	BA.1	2022-01-11	2022	Russia	Moscow	Moscow	FMBA_russia
Russia/LQ-21179_S70/2022	BA.1.17	2022-01-11	2022	Russia	Moscow	Moscow	FMBA_russia
Russia/LQ-21180_S71/2022	BA.1.1.1	2022-01-11	2022	Russia	Moscow	Moscow	FMBA_russia
Russia/LQ-21185_S72/2022	BA.1.1	2022-01-11	2022	Russia	Moscow	Moscow	FMBA_russia
Russia/LQ-21198_S73/2022	BA.1.1	2022-01-11	2022	Russia	Moscow	Moscow	FMBA_russia
Russia/LQ-21204_S74/2022	BA.1.1	2022-01-11	2022	Russia	Moscow	Moscow	FMBA_russia
Russia/LQ-21205_S75/2022	BA.1.1	2022-01-11	2022	Russia	Moscow	Moscow	FMBA_russia
Russia/LQ-21255_S92/2022	BA.1.1	2022-01-14	2022	Russia	Moscow	Moscow	FMBA_russia
Russia/LQ-21258_S93/2022	BA.1	2022-01-14	2022	Russia	Moscow	Moscow	FMBA_russia
Russia/LQ-21259_S94/2022	BA.1	2022-01-14	2022	Russia	Moscow	Moscow	FMBA_russia
Russia/LQ-21269_S95/2022	BA.1.1	2022-01-14	2022	Russia	Moscow	Moscow	FMBA_russia
Russia/LQ-21273_S96/2022	BA.1.1	2022-01-14	2022	Russia	Moscow	Moscow	FMBA_russia
Russia/LQ-21274_S97/2022	BA.1.15	2022-01-14	2022	Russia	Moscow	Moscow	FMBA_russia
Russia/LQ-21276_S98/2022	BA.1.1	2022-01-14	2022	Russia	Moscow	Moscow	FMBA_russia
Russia/LQ-21278_S99/2022	BA.1.1	2022-01-14	2022	Russia	Moscow	Moscow	FMBA_russia
Russia/LQ-21279_S100/2022	BA.1.1	2022-01-14	2022	Russia	Moscow	Moscow	FMBA_russia
Russia/LQ-21288_S101/2022	BA.1.1	2022-01-15	2022	Russia	Moscow	Moscow	FMBA_russia
Russia/LQ-21289_S102/2022	BA.1.1	2022-01-15	2022	Russia	Moscow	Moscow	FMBA_russia
Russia/LQ-21290_S103/2022	BA.1.1	2022-01-15	2022	Russia	Moscow	Moscow	FMBA_russia
Russia/LQ-21300_S104/2022	BA.1.1	2022-01-15	2022	Russia	Moscow	Moscow	FMBA_russia
Russia/LQ-21321_S105/2022	BA.1.1	2022-01-16	2022	Russia	Moscow	Moscow	FMBA_russia
Russia/LQ-21322_S106/2022	BA.1	2022-01-16	2022	Russia	Moscow	Moscow	FMBA_russia
Russia/LQ-21323_S107/2022	BA.1.1	2022-01-16	2022	Russia	Moscow	Moscow	FMBA_russia
Russia/LQ-21327_S108/2022	BA.1.1	2022-01-16	2022	Russia	Moscow	Moscow	FMBA_russia
Russia/LQ-21330_S109/2022	BA.1.1	2022-01-16	2022	Russia	Moscow	Moscow	FMBA_russia
Russia/LQ-21333_S110/2022	BA.1.1	2022-01-16	2022	Russia	Moscow	Moscow	FMBA_russia
Russia/LQ-21334_S111/2022	BA.1.1	2022-01-16	2022	Russia	Moscow	Moscow	FMBA_russia
Russia/LQ-21336_S112/2022	BA.1.1	2022-01-16	2022	Russia	Moscow	Moscow	FMBA_russia
Russia/LQ-21337_S113/2022	BA.1	2022-01-16	2022	Russia	Moscow	Moscow	FMBA_russia
Russia/LQ-21342_S114/2022	BA.1.15	2022-01-16	2022	Russia	Moscow	Moscow	FMBA_russia
Russia/LQ-21345_S115/2022	BA.1.1	2022-01-16	2022	Russia	Moscow	Moscow	FMBA_russia
Russia/LQ-21346_S175/2022	BA.1.1	2022-01-16	2022	Russia	Moscow	Moscow	FMBA_russia
Russia/LQ-21380_S116/2022	BA.1.1	2022-01-16	2022	Russia	Moscow	Moscow	FMBA_russia
Russia/LQ-21382_S117/2022	BA.1.1	2022-01-16	2022	Russia	Moscow	Moscow	FMBA_russia
Russia/LQ-21387_S118/2022	BA.1.15	2022-01-16	2022	Russia	Moscow	Moscow	FMBA_russia
Russia/LQ-21388_S119/2022	BA.1.1	2022-01-16	2022	Russia	Moscow	Moscow	FMBA_russia
Russia/LQ-21390_S120/2022	BA.1.1.15	2022-01-16	2022	Russia	Moscow	Moscow	FMBA_russia
Russia/LQ-21391_S121/2022	BA.1	2022-01-16	2022	Russia	Moscow	Moscow	FMBA_russia
Russia/LQ-21398_S122/2022	BA.1	2022-01-16	2022	Russia	Moscow	Moscow	FMBA_russia
Russia/LQ-21399_S123/2022	BA.1.1	2022-01-16	2022	Russia	Moscow	Moscow	FMBA_russia
Russia/LQ-21403_S124/2022	BA.1	2022-01-16	2022	Russia	Moscow	Moscow	FMBA_russia
Russia/LQ-21408_S125/2022	BA.1.1	2022-01-16	2022	Russia	Moscow	Moscow	FMBA_russia
Russia/LQ-21409_S126/2022	BA.1.1	2022-01-16	2022	Russia	Moscow	Moscow	FMBA_russia
Russia/LQ-21414_S127/2022	BA.1.1	2022-01-16	2022	Russia	Moscow	Moscow	FMBA_russia
Russia/LQ-21417_S128/2022	BA.1	2022-01-16	2022	Russia	Moscow	Moscow	FMBA_russia
Russia/LQ-21419_S129/2022	BA.1.1	2022-01-16	2022	Russia	Moscow	Moscow	FMBA_russia
Russia/LQ-21421_S130/2022	BA.1.1	2022-01-16	2022	Russia	Moscow	Moscow	FMBA_russia
Russia/LQ-21424_S178/2022	BA.1	2022-01-16	2022	Russia	Moscow	Moscow	FMBA_russia
Russia/LQ-21426_S131/2022	BA.1.1	2022-01-16	2022	Russia	Moscow	Moscow	FMBA_russia
Russia/LQ-21429_S132/2022	BA.1.1	2022-01-16	2022	Russia	Moscow	Moscow	FMBA_russia
Russia/LQ-21433_S133/2022	BA.1.1	2022-01-16	2022	Russia	Moscow	Moscow	FMBA_russia
Russia/LQ-21436_S134/2022	BA.1.1	2022-01-16	2022	Russia	Moscow	Moscow	FMBA_russia
Russia/LQ-21443_S135/2022	BA.1.1	2022-01-16	2022	Russia	Moscow	Moscow	FMBA_russia
Russia/LQ-21444_S136/2022	BA.1	2022-01-16	2022	Russia	Moscow	Moscow	FMBA_russia
Russia/LQ-21450_S137/2022	BA.1	2022-01-16	2022	Russia	Moscow	Moscow	FMBA_russia
Russia/LQ-21453_S138/2022	BA.1.1	2022-01-16	2022	Russia	Moscow	Moscow	FMBA_russia
Russia/LQ-21456_S139/2022	BA.1.1	2022-01-16	2022	Russia	Moscow	Moscow	FMBA_russia
Russia/LQ-21459_S140/2022	BA.1.1	2022-01-16	2022	Russia	Moscow	Moscow	FMBA_russia
Russia/LQ-21460_S141/2022	BA.1.1	2022-01-16	2022	Russia	Moscow	Moscow	FMBA_russia
Russia/LQ-21465_S142/2022	BA.1.15	2022-01-16	2022	Russia	Moscow	Moscow	FMBA_russia
Russia/LQ-21467_S143/2022	BA.1	2022-01-16	2022	Russia	Moscow	Moscow	FMBA_russia
Russia/LQ-21469_S144/2022	BA.1.15	2022-01-16	2022	Russia	Moscow	Moscow	FMBA_russia
Russia/LQ-21482_S145/2022	BA.1.15	2022-01-16	2022	Russia	Moscow	Moscow	FMBA_russia
Russia/LQ-21484_S146/2022	BA.1.1	2022-01-16	2022	Russia	Moscow	Moscow	FMBA_russia
Russia/LQ-21485_S147/2022	BA.1.1	2022-01-16	2022	Russia	Moscow	Moscow	FMBA_russia
Russia/LQ-21487_S148/2022	BA.1	2022-01-16	2022	Russia	Moscow	Moscow	FMBA_russia
Russia/LQ-21489_S180/2022	BA.1.1	2022-01-16	2022	Russia	Moscow	Moscow	FMBA_russia
Russia/LQ-21496_S149/2022	BA.1.1	2022-01-16	2022	Russia	Moscow	Moscow	FMBA_russia
Russia/LQ-21498_S150/2022	BA.1.1	2022-01-16	2022	Russia	Moscow	Moscow	FMBA_russia
Russia/LQ-21508_S151/2022	BA.1	2022-01-16	2022	Russia	Moscow	Moscow	FMBA_russia
Russia/LQ-21518_S152/2022	BA.1	2022-01-16	2022	Russia	Moscow	Moscow	FMBA_russia
Russia/LQ-NikolayD_S90/2022	BA.1.1	2022-01-17	2022	Russia	Moscow	Moscow	FMBA_russia
Russia/LQ-Vladimir1_S89/2022	BA.1.1	2022-01-13	2022	Russia	Moscow	Moscow	FMBA_russia
Russia/RGD-166_S153/2022	BA.1	2022-01-13	2022	Russia	Moscow	Moscow	FMBA_russia
Russia/RGD-179_S156/2022	BA.1	2022-01-14	2022	Russia	Moscow	Moscow	FMBA_russia
Russia/RGD-186_S158/2022	BA.1.15	2022-01-14	2022	Russia	Moscow	Moscow	FMBA_russia
Russia/RGD-189_S160/2022	BA.1.1	2022-01-14	2022	Russia	Moscow	Moscow	FMBA_russia
Russia/RGD-196_S162/2022	BA.1.1	2022-01-14	2022	Russia	Moscow	Moscow	FMBA_russia
Russia/RGD-212_S167/2022	BA.1.15	2022-01-17	2022	Russia	Moscow	Moscow	FMBA_russia
Russia/RGD-214_S168/2022	BA.1.1	2022-01-17	2022	Russia	Moscow	Moscow	FMBA_russia
Russia/RGD-232_S174/2022	BA.1.1	2022-01-17	2022	Russia	Moscow	Moscow	FMBA_russia
Russia/RGD-253_S182/2022	BA.1.1	2022-01-17	2022	Russia	Moscow	Moscow	FMBA_russia
Russia/LQ-20488_S1/2022	BA.1.17	2021-12-25	2021	Russia	Moscow	Moscow	FMBA_russia
Russia/LQ-20522_S2/2022	BA.1.15	2021-12-26	2021	Russia	Moscow	Moscow	FMBA_russia
Russia/LQ-20562_S3/2022	BA.1.1	2021-12-27	2021	Russia	Moscow	Moscow	FMBA_russia
Russia/LQ-20570_S4/2022	BA.1.1	2021-12-27	2021	Russia	Moscow	Moscow	FMBA_russia
Russia/LQ-20587_S5/2022	BA.1	2021-12-27	2021	Russia	Moscow	Moscow	FMBA_russia
Russia/LQ-20589_S6/2022	BA.1.15	2021-12-27	2021	Russia	Moscow	Moscow	FMBA_russia
Russia/LQ-20594_S7/2022	BA.1.1	2021-12-27	2021	Russia	Moscow	Moscow	FMBA_russia
Russia/LQ-20598_S8/2022	BA.1.1	2021-12-27	2021	Russia	Moscow	Moscow	FMBA_russia
Russia/LQ-20599_S9/2022	BA.1	2021-12-28	2021	Russia	Moscow	Moscow	FMBA_russia
Russia/LQ-20645_S10/2022	BA.1.17	2021-12-29	2021	Russia	Moscow	Moscow	FMBA_russia
Russia/LQ-20690_S11/2022	BA.1.1	2021-12-29	2021	Russia	Moscow	Moscow	FMBA_russia
Russia/LQ-20694_S12/2022	BA.1	2021-12-29	2021	Russia	Moscow	Moscow	FMBA_russia
Russia/LQ-20698_S13/2022	BA.1.15	2021-12-29	2021	Russia	Moscow	Moscow	FMBA_russia
Russia/LQ-20706_S14/2022	BA.1.1	2021-12-29	2021	Russia	Moscow	Moscow	FMBA_russia
Russia/LQ-20707_S15/2022	BA.1	2021-12-29	2021	Russia	Moscow	Moscow	FMBA_russia
Russia/LQ-20743_S16/2022	BA.1	2021-12-30	2021	Russia	Moscow	Moscow	FMBA_russia
Russia/LQ-20750_S17/2022	BA.1	2021-12-30	2021	Russia	Moscow	Moscow	FMBA_russia
Russia/LQ-20755_S18/2022	BA.1	2021-12-30	2021	Russia	Moscow	Moscow	FMBA_russia
Russia/LQ-20757_S19/2022	BA.1	2021-12-30	2021	Russia	Moscow	Moscow	FMBA_russia
Russia/LQ-20784_S20/2022	BA.1	2021-12-30	2021	Russia	Moscow	Moscow	FMBA_russia
Russia/LQ-20791_S21/2022	BA.1.1	2021-12-31	2021	Russia	Moscow	Moscow	FMBA_russia
Russia/LQ-20806_S22/2022	BA.1.17	2021-12-31	2021	Russia	Moscow	Moscow	FMBA_russia
Russia/LQ-20908_S23/2022	BA.1.15	2022-01-04	2022	Russia	Moscow	Moscow	FMBA_russia
Russia/LQ-20923_S24/2022	BA.1.15	2022-01-04	2022	Russia	Moscow	Moscow	FMBA_russia
Russia/LQ-20929_S25/2022	BA.1.15	2022-01-04	2022	Russia	Moscow	Moscow	FMBA_russia
Russia/LQ-20946_S26/2022	BA.1.1	2022-01-04	2022	Russia	Moscow	Moscow	FMBA_russia
Russia/LQ-20955_S27/2022	BA.1.1	2022-01-04	2022	Russia	Moscow	Moscow	FMBA_russia
Russia/LQ-20959_S28/2022	BA.1	2022-01-04	2022	Russia	Moscow	Moscow	FMBA_russia
Russia/LQ-20010_S21/2022	BA.1.16	2021-12-15	2021	Russia	Moscow	Moscow	FMBA_russia
Russia/LQ-20036_S30/2022	BA.1.17	2021-12-15	2021	Russia	Moscow	Moscow	FMBA_russia
Russia/Uganda_S175/2022	BA.1	2021-12-09	2021	Russia	Moscow	Moscow	FMBA_russia
Russia/VIS-2_S192/2022	BA.1.17	2021-12-14	2021	Russia	Moscow	Moscow	FMBA_russia
Russia/VIS-5_S40/2022	BA.1.1	2021-12-16	2021	Russia	Moscow	Moscow	FMBA_russia
Russia/VIS_S220/2022	BA.1.14	2021-12-09	2021	Russia	Moscow	Moscow	FMBA_russia
