# Supplementary material for: Genomic Variability of SARS-CoV-2 Omicron Variant Circulating in the Russian Federation during Early December 2021 and Late January 2022
Source: Pathogens. 2022 Dec 2;11(12):1461. doi: 10.3390/pathogens11121461 (PMC9786029; doi:10.3390/pathogens11121461)
Supplement: Supplementary file 1 [file pathogens-11-01461-s001.zip › TableS2.xlsx]

## Sheet: Delta Omicron mutations
Nucleotide substitution	AA substitution	Present in Delta variant	Present in Omicron variant
A2832G	ORF1ab:K856R	No	Yes
G15451A	ORF1ab:G662S	Yes	No
G8393A	ORF1ab:A2710T	No	Yes
C10029T	ORF1ab:T3255I	No	Yes
C10449A	ORF1ab:P3395H	No	Yes
A18163G	ORF1ab:I5967V	No	Yes
C21618G	S:T19R	Yes	No
C21762T	S:A67V	No	Yes
G21987A	S:G142D	Yes	No
G22578A	S:G339D	No	Yes
T22679C	S:S373P	No	Yes
C22686T	S:S375F	No	Yes
G22813T	S:K417N	No	Yes
T22882G	S:N440K	No	Yes
G22898A	S:G446S	No	Yes
T22917G	S:L452R	Yes	No
G22992A	S:S477N	No	Yes
A23013C	S:E484A	No	Yes
A23040G	S:Q493R	No	Yes
G23048A	S:G496S	No	Yes
A23055G	S:Q498R	No	Yes
A23063T	S:N501Y	No	Yes
T23075C	S:Y505H	No	Yes
C23202A	S:T547K	No	Yes
C23525T	S:H655Y	No	Yes
T23599G	S:N679K	No	Yes
C23604A	S:P681H	No	Yes
C23604G	S:P681R	Yes	No
C23854A	S:N764K	No	Yes
G23948T	S:D796Y	No	Yes
C24130A	S:N856K	No	Yes
G24410A	S:D950N	Yes	No
A24424T	S:Q954H	No	Yes
T24469A	S:N969K	No	Yes
C24503T	S:L981F	No	Yes
C25000T	S:D1146D	No	Yes
C25584T	ORF3a:T64T	No	Yes
T26767C	M:I82T	Yes	No
T27638C	ORF7a:V82A	Yes	No
C27752T	ORF7a:T120I	Yes	No
C28311T	N:P13L	No	Yes
A28461G	N:D63G	Yes	No
G28881T	N:R203M	Yes	No
G29402T	N:D377Y	Yes	No

## Sheet: BA.1 BA.2 mutations
Nucleotide substitution	AA substitution	Present in BA.1 variant	Present in BA.2 variant
C21618T	T19I	No	Yes
C21762T	A67V	Yes	No
C21846T	T95I	Yes	No
T22200G	V213G	No	Yes
C22674T	S371F	No	Yes
A22688G	T376A	No	Yes
G22775A	D405N	No	Yes
A22786T	R408S	No	Yes
G22898A	G446S	Yes	No
G23048A	G496S	Yes	No
C23202A	T547K	Yes	No
C24130A	N856K	Yes	No
C24503T	L981F	Yes	No
