# Supplementary material for: Genomic Variability of SARS-CoV-2 Omicron Variant Circulating in the Russian Federation during Early December 2021 and Late January 2022
Source: Pathogens. 2022 Dec 2;11(12):1461. doi: 10.3390/pathogens11121461 (PMC9786029; doi:10.3390/pathogens11121461)
Supplement: Supplementary file 1 [file pathogens-11-01461-s001.zip › TableS3.xlsx]

## Sheet: ba1_mutations
Position	Mutation	Freq_Russia_FMBA	Freq_Russia_GISAID	Freq_world_GISAID	Mutation_countries
2	T2C	0	0	0.292826	SouthKorea
7	G7C	0	0	0.146413	Brazil
8	G8A	0	0	0.146413	Brazil
14	A14C	0	0	0.146413	Brazil
15	C15G	0	0	0.146413	Brazil
21	C21T	0	1.08108	6.00293	Argentina, Australia, Brazil, Cameroon, Canada, Chile, Greece, Guinea, Hungary, Italy, Kenya, Mexico, Pakistan, Palau, Paraguay, Russia, SaudiArabia, Singapore, SouthKorea, Taiwan, U,S,VirginIslands, USA, Ukraine
22	A22T	0	0	0.146413	Brazil
24	G24T	0	0	0.146413	Brazil
26	A26C	0	0	0.146413	Brazil
27	A27T	0	0	0.146413	Brazil
29	A29T	0	0	0.146413	Brazil
37	C37G	0	0	0.146413	Brazil
100	C100T	0	0	0.146413	Rwanda
116	G116A	0	0	0.146413	Mozambique
160	G160T	0	0	0.146413	Germany
167	G167A	0	0	0.439239	Canada
174	G174T	0	0	0.146413	Kenya
186	C186T	0	0.27027	0	Russia
189	G189A	0	0.27027	0	Russia
191	T191C	0.209205	0	0
199	G199A	0	0	0.146413	Finland
202	T202C	0.209205	0	0
203	C203T	2.51046	1.35135	1.46413	Azerbaijan, Germany, Greece, NewZealand, Peru, Russia, Syria, Turkey
204	G204A	0.41841	0	0
209	T209C	0	0	0.146413	Mexico
241	C241T	90.5858	100	96.4861	Algeria, AmericanSamoa, Andorra, AntiguaandBarbuda, Argentina, Aruba, Australia, Azerbaijan, Belgium, Belize, Bermuda, Bonaire, BosniaandHerzegovina, Botswana, Brazil, Brunei, Bulgaria, Cambodia, Cameroon, Canada, Chile, Colombia, Congo, CostaRica, Croatia, Curacao, CzechRepublic, DRC, Djibouti, DominicanRepublic, Ecuador, ElSalvador, England, Estonia, Eswatini, Finland, France, FrenchGuiana, Gam…
246	G246A	0	0	0.146413	USA
269	G269A	0	0	0.146413	Slovenia
313	C313T	0	0.27027	0	Russia
344	C344T	0.209205	0	0
365	T365A	1.25523	0	0.146413	Guadeloupe
367	C367T	0	0	0.146413	Luxembourg
384	C384T	0	0	0.146413	Mexico
386	G386A	0.209205	0.27027	0	Russia
396	A396T	0	0	0.146413	NorthernMarianaIslands
412	C412T	0.209205	0.540541	0	Russia
418	T418C	0	0	0.146413	USA
421	C421T	0	0	0.146413	Malawi
455	C455T	0	0.27027	0	Russia
478	C478T	0	0.27027	0	Russia
487	G487A	0	0.27027	0	Russia
489	A489G	0.41841	0	0
513	A513G	0	0	0.292826	Guatemala
529	G529A	0.209205	0	0
556	C556T	0	0	0.146413	Argentina
578	G578T	0	0	0.146413	CostaRica
581	G581A	0	0	0.146413	Poland
583	C583T	0.209205	0	0.146413	CostaRica
589	C589A	0	0	0.146413	Turkey
629	C629T	0.209205	0	0
664	C664T	0.41841	0	0
683	C683T	0.209205	0.810811	0	Russia
691	A691C	0	0.27027	0	Russia
705	A705G	0	0	0.146413	Finland
758	C758T	0	0.27027	0	Russia
761	A761G	0.209205	0	0
772	T772C	0	0	0.146413	Cameroon
774	C774T	0.209205	0	0
775	C775A	0	0	0.146413	Cameroon
775	C775T	0	0	0.146413	Canada
786	T786C	0	0	0.146413	Cameroon
787	G787A	0	0	0.146413	Cameroon
794	C794A	0	0	0.146413	Mexico
806	G806A	0	0	0.146413	Mexico
807	C807T	0	0	0.146413	USA
811	C811T	0	0.27027	0	Russia
823	C823T	0	0	0.439239	Bulgaria, Mexico, Peru
832	C832T	0	0	0.146413	USA
835	C835T	0	0	0.146413	Ecuador
843	C843T	0.209205	0	0
851	T851C	0	0	0.292826	Bonaire
875	C875T	0	0	0.292826	Singapore, USA
878	C878T	0	0	0.146413	Bulgaria
899	T899A	0	0	0.146413	USA
920	C920T	0.209205	0	0
936	C936T	0.209205	0	0
941	A941G	0	0	0.146413	ElSalvador
945	G945T	0	0	0.146413	USA
960	G960A	0	0	0.146413	Rwanda
967	T967C	0.209205	0.27027	0	Russia
1060	C1060T	0.209205	0	0.146413	Greece
1093	C1093T	0.209205	0	0
1098	A1098G	0	0	0.146413	Malaysia
1107	T1107C	0.209205	0	0
1113	C1113T	0.209205	0.27027	0	Russia
1148	G1148T	0.209205	0	0
1157	G1157A	0	0	0.146413	Guadeloupe
1161	G1161A	0	0	0.146413	Colombia
1170	C1170T	0.209205	0	0.146413	USA
1179	C1179T	0	0	0.146413	USA
1186	G1186A	0	0	0.146413	Netherlands
1190	C1190T	0	0.27027	0	Russia
1191	C1191T	0.209205	0	0.439239	Australia, Rwanda
1191	C1191A	0	0	0.146413	USA
1197	A1197G	0	0.27027	0.292826	Mexico, Russia
1218	C1218T	0	0	0.146413	USA
1222	T1222C	0	0	0.146413	USA
1236	A1236C	0.209205	0	0
1263	C1263T	0.209205	0	0
1267	C1267T	0.209205	0	0
1273	T1273C	0	0.27027	0	Russia
1302	C1302A	0	0	0.146413	Brazil
1305	A1305G	0	0	0.146413	USA
1314	C1314T	0	0	0.146413	Kenya
1346	C1346A	0	0	0.146413	NorthernMarianaIslands
1346	C1346T	0	0	0.146413	USA
1348	C1348T	0	0	0.146413	Spain
1363	T1363C	0	0.27027	0	Russia
1385	C1385T	0.627615	0	0
1387	C1387T	0.41841	0	0.146413	SouthKorea
1392	C1392T	0	0	0.146413	Mexico
1400	G1400A	0	0	0.146413	USA
1420	C1420T	0	0	0.146413	Syria
1427	C1427T	0	0	0.146413	Bulgaria
1441	C1441T	0.209205	0	0.146413	NorthernMarianaIslands
1452	T1452C	0	0.540541	0	Russia
1457	C1457T	0.209205	0	0
1460	A1460G	0.83682	0	0
1519	C1519T	0.209205	0	0
1544	G1544T	0.209205	0	0
1558	A1558G	0	0	0.292826	Brazil, CostaRica
1567	C1567T	0	0	0.146413	USA
1583	G1583A	0.209205	0	0
1599	G1599T	0	0.27027	0	Russia
1625	C1625A	0	0	0.146413	Latvia
1627	C1627T	0	0	0.292826	India, Mexico
1684	C1684T	0	0	0.146413	Spain
1701	C1701T	0.209205	0	0
1710	C1710T	0	0.27027	0	Russia
1728	T1728G	0	0	0.146413	Canada
1730	G1730A	0	0.27027	0	Russia
1779	C1779A	0	0	0.146413	Portugal
1820	G1820A	0.41841	0.27027	0	Russia
1824	C1824T	0.627615	0.27027	0	Russia
1881	A1881C	0	0.27027	0	Russia
1883	G1883A	0	0	0.146413	Romania
1897	A1897G	0	0	0.146413	Kenya
1901	T1901C	0	0	0.146413	Mexico
1912	C1912T	0	0.27027	0.878477	Australia, DRC, Malta, Mexico, Russia, Tunisia, Ukraine
1919	C1919T	0	0	0.146413	BosniaandHerzegovina
1929	C1929T	0	0	0.146413	Zambia
1957	G1957T	0	0.27027	0.585652	Latvia, Malawi, Russia, Rwanda
1959	C1959T	0	0	0.146413	CostaRica
1992	A1992G	0	0	0.146413	Singapore
1997	C1997T	0	0	0.146413	Greece
2032	T2032C	0	0	0.146413	CostaRica
2062	C2062T	0	0	0.146413	USA
2113	C2113T	0	0	0.439239	Colombia, Mexico, USA
2119	C2119T	0	0.27027	0	Russia
2151	A2151G	0.209205	0	0
2159	G2159A	0	0	0.146413	CostaRica
2189	C2189T	0	0	0.146413	Zimbabwe
2198	G2198T	0.83682	0	0
2232	C2232T	0	0	0.146413	Luxembourg
2245	C2245T	0	0.27027	0	Russia
2266	T2266C	0.209205	0	0
2295	C2295T	0	0	0.146413	Djibouti
2300	T2300C	0	0.27027	0	Russia
2303	A2303G	0	0.27027	0	Russia
2304	A2304T	0	0.27027	0	Russia
2305	G2305T	0	0	0.146413	France
2306	C2306T	0	0.27027	0	Russia
2309	G2309A	0	0	0.146413	Turkey
2323	G2323A	1.46444	1.89189	0	Russia
2326	T2326C	0.209205	0	0
2334	C2334T	0	0	0.146413	Latvia
2342	A2342G	0.209205	0	0
2351	G2351A	0	0.27027	0	Russia
2354	G2354A	0	0	0.585652	Belgium, Macedonia, Switzerland
2381	G2381T	0.41841	0	0
2388	C2388T	0	0	0.146413	USA
2395	C2395T	0	0	0.146413	USA
2433	C2433T	0	0.27027	0	Russia
2441	G2441A	0.209205	0	0.146413	Curacao
2445	C2445T	0	0	0.146413	Guadeloupe
2447	G2447T	0.209205	0	0
2470	C2470T	32.2176	22.4324	44.3631	AmericanSamoa, AntiguaandBarbuda, Argentina, Aruba, Australia, Azerbaijan, Belgium, Belize, Bonaire, Brazil, Bulgaria, Cambodia, Cameroon, Canada, Chile, Colombia, CostaRica, Croatia, Curacao, CzechRepublic, Ecuador, ElSalvador, England, Estonia, Finland, Germany, Greece, Guadeloupe, Guatemala, Honduras, HongKong, Hungary, Iraq, Ireland, Italy, Japan, Kenya, Lebanon, Luxembourg, Macedonia, Malays…
2491	A2491G	0	0	0.146413	Guatemala
2509	C2509T	0	0	0.146413	Australia
2512	A2512G	0	0	0.146413	Canada
2518	G2518T	0	0	0.146413	Poland
2523	C2523T	0.209205	0	0.292826	Mexico, USA
2530	A2530G	0.209205	0	0
2607	C2607T	0.209205	0	0
2668	C2668A	0	0	0.146413	Australia
2695	C2695T	0	0	0.439239	USA
2716	C2716T	0	0	0.146413	Ecuador
2727	C2727T	0	0	0.146413	Macedonia
2729	A2729C	0	0.27027	0	Russia
2746	T2746C	0	0	0.146413	Maldives
2751	C2751A	0	0	0.146413	SouthAfrica
2756	A2756G	0	0	0.146413	Australia
2783	A2783G	0	0	0.146413	Mozambique
2784	A2784G	0.209205	0	0
2801	G2801T	0	0	0.146413	Romania
2832	A2832G	100	99.4595	98.6823	Algeria, AmericanSamoa, Andorra, AntiguaandBarbuda, Argentina, Aruba, Australia, Azerbaijan, Belgium, Belize, Bermuda, Bonaire, BosniaandHerzegovina, Botswana, Brazil, Brunei, Bulgaria, Cambodia, Cameroon, Canada, Chile, Colombia, Congo, CostaRica, Croatia, Curacao, CzechRepublic, DRC, Djibouti, DominicanRepublic, Ecuador, ElSalvador, England, Estonia, Eswatini, Finland, France, FrenchGuiana, Gam…
2841	C2841T	0	0	0.146413	Botswana
2847	C2847T	0.209205	0	0
2902	C2902T	0.209205	0.810811	0.732064	Guadeloupe, Mexico, Norway, Russia, Spain, USA
2908	A2908T	0	0.27027	0	Russia
2918	C2918T	0	0	0.146413	Mexico
2939	C2939T	0.41841	0	0
2956	A2956G	0	0	0.146413	USA
2973	C2973T	0.209205	0	0
2983	C2983T	0	0	0.146413	Chile
3026	T3026C	0.209205	0	0
3037	C3037T	98.1172	100	99.8536	Algeria, AmericanSamoa, Andorra, AntiguaandBarbuda, Argentina, Aruba, Australia, Azerbaijan, Belgium, Belize, Bermuda, Bonaire, BosniaandHerzegovina, Botswana, Brazil, Brunei, Bulgaria, Cambodia, Cameroon, Canada, Chile, Colombia, Congo, CostaRica, Croatia, Curacao, CzechRepublic, DRC, Djibouti, DominicanRepublic, Ecuador, ElSalvador, England, Estonia, Eswatini, Finland, France, FrenchGuiana, Gam…
3042	C3042T	0	0	0.146413	Mexico
3049	T3049C	0	0	0.292826	Australia, Slovenia
3053	G3053T	0	0	0.146413	Mexico
3055	T3055C	0	0	0.439239	USA, Zimbabwe
3069	A3069G	0.209205	0	0
3092	C3092T	0.209205	0	0.146413	Estonia
3104	T3104C	0.209205	0	0.146413	Guinea
3119	G3119A	0	0	0.146413	Canada
3140	C3140T	0	0	0.146413	Colombia
3153	G3153A	0.41841	0	0
3156	C3156T	0	0.540541	0.146413	Maldives, Russia
3168	C3168T	0.209205	1.35135	0	Russia
3176	C3176T	0	0	0.146413	USA
3177	C3177T	0.41841	0	0.146413	Greece
3182	G3182A	0	0.540541	0	Russia
3231	G3231A	0	0.27027	0	Russia
3234	A3234G	0	0	0.146413	CostaRica
3241	C3241T	2.09205	0.810811	2.34261	Argentina, Botswana, Brunei, Bulgaria, England, FrenchGuiana, Ireland, Italy, Luxembourg, Moldova, Pakistan, Portugal, Romania, Russia
3261	C3261T	0.209205	0	0.146413	Oman
3264	C3264T	0	0	0.146413	Chile
3267	C3267T	0	0	0.146413	Thailand
3276	C3276T	0	0	0.292826	Latvia
3285	A3285G	0.209205	0	0
3319	A3319G	0	0	0.146413	Malawi
3330	C3330A	0.209205	0	0
3338	G3338T	0	0	0.146413	Argentina
3365	C3365T	0	0	0.146413	Belgium
3369	C3369T	0	0	0.146413	Guadeloupe
3426	C3426T	0	0	0.146413	Mexico
3455	T3455A	0	0	0.146413	USA
3470	G3470A	0	0	0.146413	USA
3482	G3482A	0	0	0.146413	Finland
3504	A3504G	0	0	0.146413	Brazil
3535	C3535T	0	0	0.146413	Bonaire
3538	A3538G	0	0	0.146413	CostaRica
3543	C3543T	0.41841	0.27027	0	Russia
3546	A3546G	0	0	0.146413	Malawi
3597	C3597T	0	0	0.146413	Ecuador
3602	C3602T	0	0	0.292826	Peru
3604	C3604T	0.209205	0	0
3606	G3606T	0.209205	0	0
3607	T3607C	0	0	0.146413	Guadeloupe
3616	T3616A	0.209205	0	0
3619	C3619A	0	0	0.146413	Finland
3625	A3625G	0	0	0.146413	USA
3653	C3653T	0.209205	0	0.585652	Bulgaria, England, Ireland, Luxembourg
3692	G3692T	0	0	0.146413	Croatia
3743	C3743T	0	0.27027	0.146413	Brazil, Russia
3779	A3779G	0	0	0.146413	Rwanda
3784	C3784T	0.209205	0	0
3787	C3787T	0	0	0.146413	Iraq
3811	C3811T	0	0	0.146413	Mexico
3862	T3862C	0	0	0.146413	Peru
3871	G3871T	0	0	0.292826	Australia, Kenya
3874	C3874T	0	0	0.146413	Macedonia
3885	C3885T	0	0	0.146413	Kenya
3896	G3896T	0	0.27027	0	Russia
3900	A3900G	0	0	0.146413	Slovenia
3903	C3903T	0	0	0.146413	Mexico
3937	G3937A	0	0	0.146413	Mexico
3944	C3944G	6.06695	3.78378	0	Russia
3946	A3946T	6.06695	3.78378	0	Russia
3951	A3951G	0	0	0.146413	Macedonia
3984	C3984T	0	0	0.146413	Mexico
3991	T3991G	0	0	0.146413	USA
3994	G3994A	0	0	0.146413	England
4016	G4016A	0	0	0.146413	USA
4021	C4021T	0.209205	0.27027	0	Russia
4067	G4067A	0.209205	0	0
4096	T4096C	0	0	0.146413	USA
4103	A4103T	0	0.27027	0	Russia
4113	C4113T	0	0.27027	0	Russia
4118	T4118G	0	0	0.146413	Finland
4125	T4125C	0	0	0.146413	Chile
4140	A4140G	0	0.27027	0	Russia
4144	G4144A	0	0	0.146413	USA
4179	A4179G	0.209205	0	0
4186	T4186C	0	0	0.146413	Curacao
4201	G4201A	0	0	0.146413	USA
4212	C4212T	0	0	0.146413	Lithuania
4234	C4234T	0	0	0.146413	Australia
4255	G4255A	1.04603	0	0
4285	G4285A	0	0	0.146413	Lithuania
4320	C4320T	0	0	0.146413	Australia
4321	C4321T	0.209205	0	0
4381	T4381C	0	0.27027	0	Russia
4388	T4388C	0.209205	5.13514	0	Russia
4410	C4410T	0	0	0.146413	USA
4456	C4456T	0.209205	0.27027	0	Russia
4508	G4508A	0	0	0.146413	Chile
4528	A4528G	0	0	0.146413	Botswana
4543	C4543T	0	0	0.146413	Ghana
4576	A4576T	0	0.27027	0	Russia
4579	T4579A	0.209205	0.27027	0.146413	Cambodia, Russia
4582	C4582T	0	0	0.292826	Slovenia, Switzerland
4600	T4600C	0.209205	0	0
4683	C4683T	0	0	0.292826	Australia
4698	C4698A	0	0	0.146413	Luxembourg
4707	A4707G	0	0	0.146413	Macedonia
4755	C4755T	0	0.27027	0	Russia
4779	T4779C	0	0.810811	0	Russia
4780	C4780T	0	0	0.146413	USA
4782	C4782T	0	0.540541	0	Russia
4784	C4784T	0.209205	0	0
4794	C4794T	0	0.27027	0	Russia
4810	C4810A	0.209205	0	0
4825	T4825C	0.209205	0	0
4838	A4838G	0	0.27027	0	Russia
4842	A4842G	0	0	0.146413	Germany
4888	T4888C	0	0.27027	0	Russia
4891	C4891T	0	0	0.146413	NewZealand
4927	C4927T	0	0.27027	0.146413	Russia, Syria
4931	C4931T	0	0	0.146413	Singapore
4937	A4937G	0	0	0.146413	Croatia
4955	G4955A	0	0	0.146413	England
4958	G4958T	0	0.27027	0	Russia
4965	C4965T	0.209205	0	0.146413	USA
5017	G5017A	0	0	0.146413	Mexico
5025	C5025T	0.209205	0	0.292826	Mexico, USA
5034	A5034G	0	0.27027	0	Russia
5035	T5035C	0	0.27027	0	Russia
5055	C5055T	0.209205	0	0
5107	A5107G	0.209205	0	0
5134	T5134C	0	0	0.146413	ElSalvador
5136	A5136G	0	0	0.146413	Zhejiang
5142	C5142T	0	0	0.146413	Romania
5171	C5171T	0	0	0.146413	Botswana
5173	C5173T	0	0.27027	0	Russia
5175	C5175T	0	0	0.146413	Italy
5178	C5178T	0.209205	0	0
5183	C5183T	0	0	0.146413	Japan
5184	C5184T	0.209205	0	0
5188	T5188C	0.41841	1.08108	0	Russia
5203	C5203T	0	0	0.146413	Mexico
5221	C5221T	0	0	0.146413	Mexico
5239	C5239T	0	0	0.146413	Peru
5240	C5240T	0.209205	0	0
5252	G5252A	0.209205	0	0
5273	G5273A	0.209205	0	0
5287	T5287C	0	0.27027	0	Russia
5294	G5294A	0	0	0.146413	USA
5298	C5298T	0.209205	1.35135	0	Russia
5301	C5301T	0	0	0.292826	Hungary, Nigeria
5310	C5310T	0	0.27027	0	Russia
5353	A5353G	0	0	0.146413	USA
5356	T5356C	0.209205	0	0
5365	C5365T	0.209205	0	0.146413	Japan
5368	A5368C	0	0	0.146413	USA
5386	T5386G	99.3724	100	99.4143	Algeria, AmericanSamoa, Andorra, AntiguaandBarbuda, Argentina, Aruba, Australia, Azerbaijan, Belgium, Belize, Bermuda, Bonaire, BosniaandHerzegovina, Botswana, Brazil, Brunei, Bulgaria, Cambodia, Cameroon, Canada, Chile, Colombia, Congo, CostaRica, Croatia, Curacao, CzechRepublic, DRC, Djibouti, DominicanRepublic, Ecuador, ElSalvador, England, Estonia, Eswatini, Finland, France, FrenchGuiana, Gam…
5387	G5387A	0.209205	0	0
5392	C5392T	0	0.27027	0.146413	Guadeloupe, Russia
5455	A5455G	0	0.540541	0	Russia
5467	C5467T	0.209205	0	0.146413	USA
5481	C5481T	0	0	0.146413	Peru
5497	C5497T	0	0	0.146413	Italy
5511	A5511G	0	0	0.146413	USA
5512	C5512T	0	0	0.146413	Australia
5515	G5515T	0.209205	0.27027	4.68521	Argentina, Bermuda, Bonaire, Brazil, Canada, Curacao, Ecuador, Estonia, Greece, Ireland, Mexico, NewZealand, Pakistan, Peru, Russia, Suriname, Taiwan, USA
5554	G5554T	0.209205	0	0
5557	T5557C	0	0.27027	0	Russia
5575	C5575T	0.209205	0	0.439239	Bonaire, DominicanRepublic
5608	A5608G	0	0	0.146413	Brazil
5646	C5646T	0	0	0.146413	Ukraine
5654	C5654T	0	0.27027	0	Russia
5657	G5657A	0	0	0.146413	Hungary
5672	C5672T	0.83682	0.27027	0.878477	Argentina, Germany, Italy, Peru, Russia, Spain
5691	C5691T	0.209205	0	0
5719	T5719G	0	0	0.146413	Mexico
5724	C5724T	0	0	0.146413	Malaysia
5730	C5730T	1.04603	0.810811	1.75695	Belgium, Botswana, Canada, Croatia, France, Guadeloupe, Hungary, Namibia, Nepal, NewZealand, Russia, USA
5746	C5746T	0.209205	0	0
5777	C5777T	0	0.27027	0	Russia
5806	C5806T	0	0	0.146413	Canada
5812	C5812T	0	30.8108	0.146413	Ghana, Russia
5826	C5826T	1.04603	0	0.146413	Palau
5830	G5830A	0	0.27027	0	Russia
5833	C5833T	0	0	0.146413	Japan
5869	C5869T	0.41841	0	0
5914	A5914G	0	0	0.146413	Pakistan
5924	G5924A	7.74059	7.2973	12.0059	Argentina, Australia, BosniaandHerzegovina, Brunei, Bulgaria, Cameroon, Canada, Colombia, CostaRica, Croatia, CzechRepublic, England, FrenchGuiana, Germany, Hungary, Ireland, Italy, Jordan, Kenya, Luxembourg, Macedonia, Mexico, Moldova, Netherlands, NewZealand, Pakistan, Panama, Peru, Portugal, Romania, Russia, Rwanda, SouthAfrica, Spain, Zambia, Zimbabwe
5934	C5934T	0	0.27027	0	Russia
6051	A6051G	0	0	0.146413	Chile
6109	G6109A	0	0	0.439239	Australia
6120	C6120T	0	0	0.292826	Georgia, Greece
6145	C6145T	0.209205	0	0
6148	T6148G	0.209205	0	0
6191	A6191G	0	0.27027	0	Russia
6192	C6192T	0	0	0.146413	Croatia
6198	C6198T	0	0	0.146413	ElSalvador
6274	T6274C	0.209205	0	0
6294	T6294C	0	0	0.146413	Australia
6330	C6330T	0	0.27027	0	Russia
6336	C6336T	0	0	0.292826	USA
6385	C6385T	0	0	0.146413	Australia
6402	C6402T	0	0.27027	0	Russia
6430	T6430C	0	0	0.146413	Australia
6500	C6500T	0	0	0.146413	USA
6513	G6513A	0	0	0.146413	Nepal
6515	T6515A	0	0.27027	0.146413	Nepal, Russia
6525	C6525T	0	0	0.292826	Australia
6539	C6539T	0	0	0.146413	Macedonia
6564	T6564G	0	0	0.146413	Poland
6584	A6584G	0	0	0.146413	Mexico
6590	A6590C	0.209205	0	0
6593	C6593T	0	0	0.146413	USA
6606	C6606T	0	0	0.146413	Argentina
6633	C6633T	0	0	0.292826	Brunei, Finland
6636	C6636T	0.209205	0	0
6643	T6643C	0	0	0.146413	Malawi
6653	G6653A	0	0	0.146413	USA
6664	C6664T	0	0	0.146413	USA
6689	G6689A	0.209205	0	0
6698	T6698C	0	0	0.292826	Bulgaria, Luxembourg
6740	C6740T	0	0	0.146413	Norway
6781	C6781T	0.209205	0.540541	0	Russia
6785	A6785G	0	0	0.146413	USA
6813	C6813T	0.41841	0	0
6822	C6822T	0	0	1.31772	NewZealand
6843	C6843T	0	0.540541	0	Russia
6871	T6871A	0	0.27027	0	Russia
6883	C6883T	0	0	0.146413	SouthAfrica
6917	T6917A	0	0.27027	0	Russia
6935	T6935A	0	0.27027	0	Russia
6941	C6941T	0	0.27027	0	Russia
6968	C6968T	0	0.27027	0	Russia
6973	A6973G	0	0	0.146413	Rwanda
6988	T6988C	0	0	0.146413	Ireland
6996	T6996G	0.209205	0	0
7006	C7006T	0	0	0.146413	Germany
7032	A7032T	0	0.27027	0	Russia
7037	G7037T	0	0.27027	0	Russia
7063	C7063T	0	0	0.146413	Malaysia
7083	C7083T	0	0	0.146413	Ireland
7088	A7088G	0.41841	0	0
7096	T7096C	0.209205	0	0
7104	C7104T	0	0	0.146413	Australia
7145	G7145A	0.627615	0.27027	0	Russia
7162	C7162T	0.209205	0	0
7183	T7183C	0	0	0.146413	Curacao
7195	C7195T	0	0	0.146413	Japan
7255	A7255G	0.209205	0	0
7267	C7267T	0	0	0.146413	Luxembourg
7283	G7283A	0	0	0.146413	Australia
7295	G7295A	0	0	0.146413	Chile
7303	C7303T	0	0	0.146413	Germany
7374	A7374G	0	0	0.146413	USA
7420	C7420T	0	0.27027	0	Russia
7431	C7431T	0	0	0.146413	USA
7438	T7438C	0	0	0.146413	Curacao
7493	A7493G	0	0	0.146413	Argentina
7553	G7553T	0	0.27027	0	Russia
7594	C7594T	0	0	0.146413	USA
7633	T7633C	0	0	0.146413	Greece
7642	T7642C	0	0.27027	0	Russia
7666	T7666C	0	0.27027	0	Russia
7681	C7681T	0	0	0.146413	Australia
7713	C7713T	0	0	0.146413	Brazil
7747	T7747C	0	0.27027	0	Russia
7764	C7764T	0	0	0.146413	Romania
7765	C7765T	0	0	0.146413	USA
7772	C7772T	0	0	0.439239	Canada
7823	C7823T	0	0	0.146413	USA
7840	C7840T	0	0	0.146413	Mexico
7850	G7850A	0.209205	0	0
7865	G7865A	0.209205	0	0
7869	C7869T	0.209205	0	0
7926	C7926T	0.209205	0.27027	1.75695	Azerbaijan, Bonaire, Luxembourg, Russia, USA
7984	T7984C	0	0	0.292826	Germany, Peru
8003	G8003T	0	0	0.146413	Bulgaria
8106	C8106T	0	0	0.146413	Iraq
8109	C8109T	0	0.27027	0	Russia
8123	C8123T	0	0.540541	0	Russia
8140	C8140T	0	0	0.146413	Italy
8171	G8171A	0	0	0.146413	Curacao
8247	C8247T	0	0	0.146413	SouthAfrica
8290	C8290T	0	0.27027	0	Russia
8296	T8296C	0.209205	0	0
8299	C8299T	0	0	0.146413	Aruba
8302	A8302G	0	0	0.732064	Brazil, Colombia, Guatemala, Mexico, USA
8318	C8318T	0.209205	0	0
8326	C8326T	0	0.27027	0	Russia
8344	C8344T	0.209205	0	0
8356	T8356C	0	0.27027	0	Russia
8371	G8371A	0	0	0.146413	Rwanda
8374	A8374G	0	0.27027	0	Russia
8379	A8379G	0	0.27027	0	Russia
8380	A8380T	0	0.27027	0	Russia
8383	T8383A	0	0.27027	0	Russia
8387	A8387T	0	0.27027	0	Russia
8393	G8393A	99.3724	95.1351	99.2679	Algeria, AmericanSamoa, Andorra, AntiguaandBarbuda, Argentina, Aruba, Australia, Azerbaijan, Belgium, Belize, Bermuda, Bonaire, BosniaandHerzegovina, Botswana, Brazil, Brunei, Bulgaria, Cambodia, Cameroon, Canada, Chile, Colombia, Congo, CostaRica, Croatia, Curacao, CzechRepublic, DRC, Djibouti, DominicanRepublic, Ecuador, ElSalvador, England, Estonia, Eswatini, Finland, France, FrenchGuiana, Gam…
8464	T8464C	0	0	0.146413	Germany
8540	G8540T	0.209205	0	0
8563	T8563C	0	0	0.146413	Argentina
8592	T8592C	0.209205	0	0
8605	C8605T	0.209205	0	0
8623	T8623C	0	0.27027	0	Russia
8650	C8650T	0	0.27027	0	Russia
8651	A8651G	0.209205	0	0.146413	Greece
8652	T8652C	0.41841	0.27027	0	Russia
8653	G8653C	0.209205	0	0
8655	C8655T	0	1.08108	0	Russia
8658	A8658G	0	0	0.439239	Mexico
8743	T8743C	0	0	0.146413	Mexico
8804	A8804G	0	0	0.146413	Australia
8822	T8822C	0	0.27027	0	Russia
8846	G8846A	0	0.540541	0	Russia
8917	C8917T	0	0.27027	0	Russia
8937	C8937T	0.209205	0	0
8980	C8980T	0.41841	0	0
8994	C8994T	0	0	0.146413	Macedonia
9110	C9110T	0	0.27027	0	Russia
9111	G9111A	0.41841	0	0
9145	T9145C	0	0	0.146413	USA
9165	C9165T	0	0	0.146413	USA
9205	T9205C	1.46444	0.540541	0	Russia
9224	G9224A	0	0	0.146413	Slovakia
9286	C9286T	0.209205	0.27027	0.292826	NewZealand, Russia, Syria
9308	C9308T	0	0	0.146413	Italy
9319	C9319T	0.41841	0	0.146413	USA
9343	A9343G	0.209205	0	0
9355	G9355T	0.209205	0	0
9355	G9355A	0	0	0.146413	Croatia
9360	C9360T	0	0	0.146413	Mexico
9424	A9424G	0	0	0.146413	CzechRepublic
9438	C9438T	0	0.27027	0	Russia
9454	T9454A	0	0.27027	0	Russia
9487	C9487T	0	0	0.292826	Australia, Azerbaijan
9515	C9515T	0.209205	0.810811	0	Russia
9521	C9521T	0.209205	0	0
9532	C9532T	0.209205	0	0
9555	T9555C	0	0.27027	0	Russia
9561	C9561T	0	0	0.146413	Australia
9562	A9562G	0	0.27027	0	Russia
9565	C9565T	0	0	0.146413	USA
9566	T9566C	0.41841	0	0
9604	A9604G	0	0.27027	0	Russia
9609	A9609G	0	0.27027	0	Russia
9611	C9611T	0	0	0.146413	Croatia
9664	A9664G	0	0.27027	0	Russia
9680	T9680A	0	0.27027	0	Russia
9701	A9701G	0.209205	0	0
9708	T9708G	0	0.27027	0	Russia
9717	A9717G	0	0.27027	0	Russia
9722	T9722C	0.209205	0	0
9722	T9722A	0	0.27027	0	Russia
9723	T9723C	0	0	0.146413	USA
9724	C9724T	0.209205	0	0
9735	T9735A	0	0.27027	0	Russia
9756	G9756A	0	0	0.146413	Brunei
9810	C9810T	0.209205	0	0
9857	C9857T	0	0.27027	1.02489	Canada, Guatemala, Mexico, Romania, Russia, USA
9863	C9863G	0	0.27027	0	Russia
9865	T9865G	0	0.27027	0	Russia
9873	A9873G	0	0.27027	0	Russia
9935	A9935G	0	0	0.146413	Zambia
9943	C9943T	0	0.27027	0	Russia
9979	C9979T	0	0	0.146413	Macedonia
9996	C9996T	0.209205	0	0
10024	A10024G	0	0	0.146413	Netherlands
10029	C10029T	100	100	100	Algeria, AmericanSamoa, Andorra, AntiguaandBarbuda, Argentina, Aruba, Australia, Azerbaijan, Belgium, Belize, Bermuda, Bonaire, BosniaandHerzegovina, Botswana, Brazil, Brunei, Bulgaria, Cambodia, Cameroon, Canada, Chile, Colombia, Congo, CostaRica, Croatia, Curacao, CzechRepublic, DRC, Djibouti, DominicanRepublic, Ecuador, ElSalvador, England, Estonia, Eswatini, Finland, France, FrenchGuiana, Gam…
10036	C10036T	0	0	0.292826	Malawi, Peru
10039	C10039T	0.209205	0	0
10084	T10084A	0	0	0.146413	Italy
10108	A10108G	0	0	0.146413	Serbia
10135	T10135C	7.11297	5.13514	8.93119	Andorra, Argentina, Aruba, Australia, Azerbaijan, Bonaire, Cameroon, Congo, CostaRica, Curacao, ElSalvador, England, Guinea, India, Mexico, NewZealand, NorthernMarianaIslands, Norway, Paraguay, Peru, Portugal, Russia, TrinidadandTobago, USA, Zhejiang
10138	C10138T	0.209205	0	0
10156	C10156T	0	0	0.146413	Bonaire
10183	C10183T	0	0	0.146413	Romania
10277	C10277T	0	0	0.292826	Kenya, USA
10279	C10279T	0.41841	0.27027	0	Russia
10319	C10319T	0.209205	0	0
10323	A10323G	0.41841	0.27027	0.878477	Mexico, Moldova, Russia, Serbia, USA
10330	T10330C	0	0.27027	0	Russia
10336	C10336T	0	0	0.146413	Mexico
10376	C10376T	0	0	0.146413	Botswana
10396	G10396T	0	0	0.146413	Mexico
10440	C10440T	0.209205	0	0
10449	C10449A	94.3515	99.4595	99.7072	Algeria, AmericanSamoa, Andorra, AntiguaandBarbuda, Argentina, Aruba, Australia, Azerbaijan, Belgium, Belize, Bermuda, Bonaire, BosniaandHerzegovina, Botswana, Brazil, Brunei, Bulgaria, Cambodia, Cameroon, Canada, Chile, Colombia, Congo, CostaRica, Croatia, Curacao, CzechRepublic, DRC, Djibouti, DominicanRepublic, Ecuador, ElSalvador, England, Estonia, Eswatini, Finland, France, FrenchGuiana, Gam…
10507	C10507T	0.209205	0	0
10543	C10543T	0.209205	0	0.146413	Saint-Martin
10546	T10546C	0	0.27027	0	Russia
10560	C10560G	0	0	0.732064	Japan, USA
10573	T10573C	0.209205	0	0
10702	C10702T	0.209205	0	0.292826	Mexico, USA
10765	C10765T	0	0	0.146413	Finland
10771	T10771C	0	0	0.146413	Canada
10790	C10790T	0	0.27027	0.146413	Luxembourg, Russia
10834	C10834T	0.209205	0	0
10870	G10870T	0	0.540541	0	Russia
10885	T10885C	0	0	0.146413	USA
10892	A10892G	0	0	0.146413	Zambia
10969	C10969T	0	0	0.292826	Mexico
10981	G10981T	0	0	0.146413	SouthAfrica
11003	C11003T	0.209205	0	0
11008	C11008T	0.209205	0	0
11020	C11020T	0	0	0.146413	Azerbaijan
11049	T11049C	0	0	0.146413	CzechRepublic
11050	C11050T	0.209205	0	0
11053	G11053T	0.209205	0.810811	0	Russia
11074	C11074T	0	0.27027	0	Russia
11083	G11083T	0	0.810811	0.146413	CostaRica, Russia
11092	T11092C	0	0.27027	0	Russia
11098	T11098C	0	0	0.146413	NewZealand
11109	C11109T	0	0	0.585652	Brazil, Guadeloupe, USA
11124	C11124T	0	0	0.146413	Macedonia
11150	G11150A	0	0	0.146413	USA
11173	C11173T	0	0	0.146413	Australia
11250	G11250A	0	0	0.146413	NewZealand
11287	G11287T	0	0	0.146413	India
11291	G11291A	0	0	0.146413	Italy
11320	T11320C	0	0	0.146413	Botswana
11333	G11333T	4.39331	2.16216	0	Russia
11339	C11339T	0	0	0.146413	Australia
11345	C11345T	0.209205	0	0
11396	C11396T	0	0	0.439239	Australia, Paraguay, USA
11416	C11416T	0	0	0.146413	Chile
11422	T11422C	0.209205	0	0.585652	Brazil
11425	A11425G	0.209205	0	0
11442	C11442T	0	0	0.146413	NewZealand
11449	T11449C	0.209205	0	0.146413	Finland
11455	C11455T	0	0	0.146413	Thailand
11479	C11479A	0	0	0.146413	Peru
11537	A11537G	97.0711	95.9459	100	Algeria, AmericanSamoa, Andorra, AntiguaandBarbuda, Argentina, Aruba, Australia, Azerbaijan, Belgium, Belize, Bermuda, Bonaire, BosniaandHerzegovina, Botswana, Brazil, Brunei, Bulgaria, Cambodia, Cameroon, Canada, Chile, Colombia, Congo, CostaRica, Croatia, Curacao, CzechRepublic, DRC, Djibouti, DominicanRepublic, Ecuador, ElSalvador, England, Estonia, Eswatini, Finland, France, FrenchGuiana, Gam…
11572	C11572T	0	0	0.146413	Singapore
11575	C11575T	0.209205	0	0
11653	C11653T	1.46444	0.540541	0	Russia
11681	C11681T	0.209205	0	0
11752	C11752T	0.209205	0	0
11758	C11758T	0	0.27027	0	Russia
11767	C11767T	0	0.27027	0.146413	Russia, USA
11773	T11773A	0.209205	0	0
11800	G11800A	0	0	0.146413	CostaRica
11828	G11828A	0	0	0.146413	Ghana
11941	C11941T	0	0	0.146413	Luxembourg
11950	C11950T	0	0	1.31772	Belize, Canada, CostaRica, Malta, Slovakia, USA
11970	A11970G	0	0	0.146413	Portugal
11989	T11989C	0.209205	0	0
12026	A12026T	0	0.27027	0	Russia
12028	G12028T	0	0.27027	0	Russia
12030	A12030C	0	0.27027	0	Russia
12038	G12038A	0	0	0.146413	USA
12049	C12049T	0.209205	0	0.146413	USA
12073	C12073T	0	0	0.146413	Australia
12079	G12079A	0	0	0.146413	Portugal
12085	C12085T	0	0	0.146413	U,S,VirginIslands
12100	C12100T	0	0.27027	0	Russia
12103	A12103G	0	0	0.146413	USA
12110	A12110G	0	0	0.146413	CostaRica
12115	C12115T	0.209205	0	0
12119	C12119T	0	0	0.146413	USA
12141	C12141T	0	0	0.146413	Canada
12191	G12191T	0	0.540541	0	Russia
12306	A12306G	0.209205	0	0
12312	C12312T	0	0	0.146413	Portugal
12315	G12315A	0.209205	0	0
12356	A12356G	0.209205	0	0
12358	A12358G	0	0	0.146413	Japan
12369	C12369A	0.209205	0	0
12400	C12400T	0.209205	0	0.292826	Colombia, CostaRica
12439	C12439T	0.209205	0	0
12465	C12465T	0	0	0.146413	Paraguay
12473	C12473T	0	0	0.146413	Botswana
12484	C12484T	0.209205	0	0
12513	C12513T	0.209205	0	0.292826	Canada, Croatia
12525	C12525T	0	0	0.439239	SouthKorea, USA
12525	C12525A	0	0	0.292826	Moldova
12546	C12546T	0	0	0.146413	Bulgaria
12634	A12634G	0.209205	0	0
12644	A12644G	0.209205	0	0
12709	A12709G	0	0	0.146413	Bonaire
12741	C12741T	0	0	0.292826	Andorra, USA
12747	C12747T	0.209205	0	0
12754	C12754T	0	0	0.146413	Mexico
12763	C12763T	0	1.35135	0	Russia
12781	C12781T	0	0	0.292826	Paraguay, USA
12784	C12784T	0.209205	0	0
12786	C12786T	1.67364	0.540541	1.46413	Brazil, Canada, Kenya, Russia, Spain, Zambia
12789	C12789T	0	0	0.146413	Netherlands
12827	T12827A	0	0	0.146413	Macedonia
12844	G12844A	0	0	0.146413	Finland
12864	A12864C	0	0	0.146413	Andorra
12877	T12877C	0.83682	0	0
12880	C12880T	0	0	0.292826	Australia, Canada
12970	C12970T	0.209205	0	0.146413	CzechRepublic
13018	T13018C	0.41841	0.27027	0.146413	Jordan, Russia
13019	C13019T	0	0	0.146413	USA
13059	C13059T	0	0	0.146413	USA
13119	C13119T	0	0	0.146413	USA
13124	G13124A	0	0	0.146413	Norway
13138	C13138T	0	0	0.146413	SouthAfrica
13170	C13170T	0	0	0.146413	Estonia
13176	C13176T	0.209205	0.27027	0	Russia
13178	G13178A	0	0	0.146413	Mexico
13183	G13183A	0.209205	0	0
13188	T13188C	0	0.27027	0	Russia
13195	T13195C	99.7908	99.7297	99.5608	Algeria, AmericanSamoa, Andorra, AntiguaandBarbuda, Argentina, Aruba, Australia, Azerbaijan, Belgium, Belize, Bermuda, Bonaire, BosniaandHerzegovina, Botswana, Brazil, Brunei, Bulgaria, Cambodia, Cameroon, Canada, Chile, Colombia, Congo, CostaRica, Croatia, Curacao, CzechRepublic, DRC, Djibouti, DominicanRepublic, Ecuador, ElSalvador, England, Estonia, Eswatini, Finland, France, FrenchGuiana, Gam…
13252	C13252T	0	0	0.146413	CostaRica
13255	C13255T	0	0	0.146413	Belize
13264	C13264T	0	0	0.146413	USA
13314	T13314C	0	0	0.146413	CostaRica
13315	A13315G	0	0	0.146413	Greece
13319	A13319C	0	0	0.146413	Chile
13339	T13339A	0	0	0.146413	Lithuania
13342	C13342T	0	0	0.146413	France
13366	C13366T	0	0	0.146413	USA
13384	C13384T	0	0	0.146413	Lithuania
13421	C13421T	0	0	2.04978	NewZealand
13424	C13424T	0	0	0.146413	Spain
13453	A13453G	0	0	0.146413	CostaRica
13458	C13458T	0	0	0.146413	Greece
13487	C13487T	0	0	0.146413	USA
13498	A13498G	0	0	0.146413	Mauritius
13517	C13517T	0	0	0.146413	USA
13567	G13567T	0	0	0.146413	Mexico
13570	G13570A	0.83682	0.540541	0.146413	Ireland, Russia
13620	C13620T	0.41841	0	0.146413	Mexico
13662	A13662G	0	0.27027	0	Russia
13665	C13665T	0	0	0.146413	Mauritius
13680	C13680T	0	0	0.146413	Turkey
13683	A13683G	0	0	0.146413	Guatemala
13708	C13708T	0	0.27027	0	Russia
13712	A13712G	0.209205	1.62162	0	Russia
13718	G13718A	0	0	0.146413	NewZealand
13721	C13721T	0	0	0.146413	NewZealand
13756	A13756G	0	2.7027	0.292826	Gambia, Mexico, Russia
13763	G13763A	0	0	0.146413	Peru
13792	C13792T	0.41841	0	0
13831	T13831C	0.209205	0	0
13860	C13860T	0	0	0.146413	USA
13882	A13882G	0	0.27027	0	Russia
13900	G13900A	0	0	0.146413	Luxembourg
13944	C13944T	0	0.27027	0	Russia
13958	G13958A	0	0	0.146413	Argentina
13962	A13962G	0	0	0.146413	Spain
13982	G13982A	0	0	0.146413	Bonaire
14010	A14010G	0	0.27027	0	Russia
14025	C14025T	0	0	0.146413	Chile
14073	T14073C	0	0	0.146413	Greece
14103	T14103C	0.41841	0	0
14107	A14107G	0.209205	0	0.146413	Cameroon
14117	C14117T	0.83682	0.27027	0.146413	Ireland, Russia
14173	T14173C	0	0	0.146413	USA
14177	C14177T	0	0	0.146413	Ecuador
14178	C14178T	0	0.27027	0	Russia
14181	G14181A	0	0	0.146413	Poland
14183	C14183T	0	0	0.146413	Canada
14184	C14184T	0.209205	0	0.292826	CostaRica, USA
14195	C14195T	0	0	0.146413	Switzerland
14220	C14220T	0.209205	0	0.146413	Ukraine
14253	A14253G	0	0	0.146413	Kosovo
14267	C14267T	0.209205	0	0
14268	G14268A	0	0	0.439239	CostaRica, Mexico, USA
14282	A14282T	0.209205	0	0
14318	C14318T	0	0	0.146413	USA
14323	C14323T	0	0	0.585652	Djibouti
14386	T14386C	0	0	0.146413	Australia
14396	C14396T	0	0	0.146413	USA
14398	G14398T	0	0.27027	0	Russia
14408	C14408T	100	100	100	Algeria, AmericanSamoa, Andorra, AntiguaandBarbuda, Argentina, Aruba, Australia, Azerbaijan, Belgium, Belize, Bermuda, Bonaire, BosniaandHerzegovina, Botswana, Brazil, Brunei, Bulgaria, Cambodia, Cameroon, Canada, Chile, Colombia, Congo, CostaRica, Croatia, Curacao, CzechRepublic, DRC, Djibouti, DominicanRepublic, Ecuador, ElSalvador, England, Estonia, Eswatini, Finland, France, FrenchGuiana, Gam…
14449	G14449A	0	0.27027	0	Russia
14490	G14490A	0	0	0.146413	Australia
14568	T14568A	0	0	0.146413	SintMaarten
14621	C14621T	0	0	0.146413	ElSalvador
14654	T14654C	0	0	0.146413	Poland
14676	C14676T	0	0	0.146413	USA
14694	C14694T	0	0	0.146413	Curacao
14701	G14701T	0	0	0.146413	USA
14715	T14715C	0	0.27027	0	Russia
14724	C14724T	0.41841	0	0.292826	Australia, CostaRica
14741	C14741A	0	0.27027	0	Russia
14790	C14790T	0.209205	0	0
14805	C14805T	0	0	0.292826	Cambodia, Thailand
14820	A14820G	0	0	1.75695	Australia
14871	T14871C	0	0	0.146413	Djibouti
14874	G14874A	0	0	0.146413	Peru
14940	A14940G	2.30126	0.540541	2.04978	Cambodia, Curacao, Mexico, Moldova, Myanmar, Russia, TrinidadandTobago, USA
14960	A14960T	0	0	0.292826	Australia
15024	C15024T	0	0	0.146413	Poland
15038	G15038A	0	0.27027	0	Russia
15039	T15039A	0	0.27027	0	Russia
15043	G15043A	0	0.27027	0	Russia
15044	T15044A	0	0.27027	0	Russia
15051	T15051C	0.209205	0	0
15187	A15187G	0	0	0.146413	Slovenia
15237	C15237T	0.41841	0	0.146413	NewZealand
15240	C15240T	100	100	99.5608	Algeria, AmericanSamoa, Andorra, AntiguaandBarbuda, Argentina, Aruba, Australia, Azerbaijan, Belgium, Belize, Bermuda, Bonaire, BosniaandHerzegovina, Botswana, Brazil, Brunei, Bulgaria, Cambodia, Cameroon, Canada, Chile, Colombia, Congo, CostaRica, Croatia, Curacao, CzechRepublic, DRC, Djibouti, DominicanRepublic, Ecuador, ElSalvador, England, Estonia, Eswatini, Finland, France, FrenchGuiana, Gam…
15243	G15243T	0	0	0.146413	FrenchGuiana
15261	T15261C	0	0.27027	0	Russia
15277	C15277T	0.209205	0	0
15280	C15280A	0	0	0.146413	France
15324	C15324T	0	0	0.146413	Slovenia
15346	C15346T	0	0.27027	0	Russia
15348	T15348C	0	0	0.146413	USA
15381	C15381T	0	0	0.146413	Belgium
15406	G15406T	0	0.27027	0	Russia
15444	G15444T	0	0.27027	0.146413	Chile, Russia
15451	G15451T	0	0	0.146413	Macedonia
15480	C15480A	0	0.27027	0	Russia
15492	T15492C	0	0.27027	0	Russia
15521	T15521A	0	0.810811	0.146413	England, Russia
15540	C15540T	0.209205	0	0.146413	Portugal
15596	A15596T	0	1.62162	0	Russia
15601	C15601T	0.209205	0	0
15656	C15656T	0	0.27027	0	Russia
15657	A15657G	0	0.27027	0.146413	Russia, USA
15717	T15717A	0.209205	0	0
15720	C15720T	0	0.27027	0.439239	Curacao, Ireland, Russia, Rwanda
15727	G15727T	0	0.27027	0	Russia
15730	G15730T	0	0.27027	0	Russia
15732	G15732A	0	0.27027	0	Russia
15734	G15734T	0	0.27027	0	Russia
15738	C15738T	0	0	0.292826	Mexico, USA
15739	A15739T	0	0.27027	0	Russia
15744	C15744T	0	0	0.146413	USA
15763	C15763T	0	0	0.146413	Turkey
15764	T15764C	0	0	0.146413	Turkey
15784	T15784C	0	0	0.292826	CostaRica, USA
15810	C15810T	0	0	0.146413	Croatia
15834	A15834G	0	0	0.146413	Poland
15891	A15891T	0	0	0.146413	Syria
15905	A15905G	0	0	0.146413	Switzerland
15906	G15906T	0	0	0.146413	Mexico
15916	T15916G	0	0.27027	0	Russia
15922	T15922C	0	0	0.146413	SouthKorea
15957	G15957A	0	0	0.146413	Syria
15960	C15960T	0	0.27027	0.146413	Russia, USA
15981	C15981T	0.209205	0	0.146413	Spain
16000	C16000G	0	0.27027	0	Russia
16010	A16010G	0	0.27027	0	Russia
16019	T16019G	0	0.27027	0	Russia
16024	T16024G	0	0.27027	0	Russia
16035	T16035C	0	0	0.146413	Chile
16049	C16049T	0	0	0.146413	Zambia
16064	A16064G	1.04603	0.27027	2.04978	Belgium, CzechRepublic, France, Germany, Guadeloupe, Japan, Luxembourg, Mauritius, Netherlands, Poland, Romania, Russia, Switzerland
16092	C16092T	0	0.27027	0	Russia
16173	C16173T	0.209205	0	0.146413	Syria
16206	G16206A	0	0.27027	0	Russia
16213	T16213C	0.209205	0	0
16215	C16215T	0.41841	0	0
16260	C16260T	0	0.27027	0.146413	Chile, Russia
16289	C16289T	0	0	0.146413	Germany
16293	C16293T	0	0	0.146413	Norway
16338	C16338T	0.209205	0	0
16362	C16362T	0	0	0.146413	USA
16394	C16394T	0	0	0.146413	Myanmar
16428	C16428T	0	0	0.146413	Australia
16457	C16457T	0.209205	0.27027	0	Russia
16468	C16468T	0	0.540541	0	Russia
16523	C16523T	0	0	0.146413	Switzerland
16559	C16559T	0	0	0.146413	Chile
16575	C16575T	0	1.08108	0	Russia
16583	A16583G	0	0	0.146413	Mexico
16596	C16596T	0	0.27027	0.585652	Bonaire, Canada, Curacao, Russia, Suriname
16616	C16616T	0	0.810811	0	Russia
16626	C16626T	0	0	0.146413	Paraguay
16650	C16650T	0.209205	0	0
16662	G16662A	0	0	0.146413	USA
16679	C16679A	0	0	0.146413	CostaRica
16692	T16692A	0	0	0.146413	Canada
16700	G16700A	0	0	0.146413	Ukraine
16705	G16705T	0	0	0.146413	Spain
16729	C16729T	0	0	0.146413	Chile
16741	G16741T	0	0	0.146413	Spain
16744	G16744A	2.51046	1.62162	2.63543	Algeria, Belize, Canada, Djibouti, Georgia, Iran, Kenya, Maldives, Russia, Rwanda
16750	C16750T	0	0	0.146413	Belgium
16783	A16783T	0	0.27027	0	Russia
16784	C16784T	0	0.27027	0	Russia
16824	A16824C	0	0	0.146413	Aruba
16852	G16852T	0	0.27027	0	Russia
16853	G16853T	0	0	0.146413	Canada
16877	C16877T	0	0	0.146413	Mozambique
16884	T16884G	0	0	0.146413	Guadeloupe
16887	C16887T	0.83682	0.27027	0.439239	Australia, Russia, SouthAfrica, USA
16912	G16912T	0	0	0.146413	CostaRica
16915	C16915T	0.41841	0	0
16935	G16935T	0.209205	0	0
16942	A16942G	0	0	0.146413	USA
16968	G16968T	0	0	0.146413	France
17000	C17000T	0	0	0.146413	Chile
17004	C17004T	0	0.27027	0	Russia
17013	A17013G	0	0.27027	0	Russia
17019	G17019A	0.209205	0	0
17042	A17042G	0	0.27027	0.146413	Bulgaria, Russia
17043	T17043C	0	0	0.146413	BosniaandHerzegovina
17079	G17079A	0	0	0.146413	Argentina
17125	C17125T	0	0.540541	0.146413	Canada, Russia
17166	T17166G	0	0.27027	0	Russia
17172	C17172T	0	0.27027	0	Russia
17222	A17222G	0	0	0.146413	Chile
17278	G17278T	0	0	0.146413	Chile
17284	T17284A	0	0	0.146413	Saint-Martin
17285	C17285T	0.209205	0	0.292826	Belgium, CostaRica
17304	C17304T	0	0	0.146413	USA
17339	C17339T	0	0	0.146413	Cameroon
17354	T17354C	0	0	0.146413	USA
17397	C17397T	0.209205	0	0
17403	C17403A	0.209205	0	0
17410	C17410T	0	0.27027	0	Russia
17411	G17411A	0	0.27027	0	Russia
17424	T17424C	0	0	0.146413	Canada
17427	G17427C	0	0	0.146413	Colombia
17433	T17433A	0	0.540541	0	Russia
17439	C17439T	0	0.27027	0	Russia
17523	G17523T	0	0.27027	0	Russia
17569	C17569T	0.41841	0	0
17574	T17574A	0	0	0.292826	Mexico, USA
17592	G17592A	0	0	0.146413	Finland
17634	C17634A	0	0	0.146413	USA
17639	C17639T	0.209205	0	0
17676	C17676T	0.41841	0	0.292826	Brunei, Germany
17678	C17678T	1.67364	2.7027	0.146413	Russia, SouthAfrica
17679	G17679A	0	0.27027	0	Russia
17688	T17688C	0.209205	0	0
17733	C17733T	0	0.27027	0	Russia
17747	C17747T	0	0.27027	0.146413	Peru, Russia
17766	C17766T	0	0	0.146413	NewZealand
17787	A17787G	0	0	0.146413	Luxembourg
17799	A17799G	0	0.27027	0	Russia
17815	G17815A	0	0	0.146413	Chile
17822	C17822T	0	0	0.146413	USA
17825	C17825T	0	0	0.146413	Brunei
17863	T17863C	0	0	0.146413	Romania
17883	C17883T	0	0	0.146413	Curacao
17999	C17999T	0	0	0.146413	Luxembourg
18029	C18029T	0.209205	0	0
18079	G18079A	0	0	0.146413	HongKong
18084	C18084T	0	0	0.146413	USA
18086	C18086T	0	0	0.292826	Rwanda
18099	T18099C	0.41841	0	0
18105	G18105A	0.209205	0	0
18110	C18110T	0	0	0.146413	DominicanRepublic
18131	C18131T	0	0.27027	0.146413	NorthernMarianaIslands, Russia
18146	A18146C	0.209205	0	0
18160	G18160A	0.209205	0	0
18163	A18163G	81.3808	99.7297	99.2679	AmericanSamoa, Andorra, AntiguaandBarbuda, Argentina, Aruba, Australia, Azerbaijan, Belgium, Belize, Bermuda, Bonaire, BosniaandHerzegovina, Botswana, Brazil, Brunei, Bulgaria, Cambodia, Cameroon, Canada, Chile, Colombia, Congo, CostaRica, Croatia, Curacao, CzechRepublic, DRC, Djibouti, DominicanRepublic, Ecuador, ElSalvador, England, Estonia, Eswatini, Finland, France, FrenchGuiana, Gambia, Geor…
18231	T18231C	0.209205	0	0
18252	C18252T	0	0.27027	0	Russia
18294	A18294T	0	0	0.146413	Netherlands
18312	C18312T	0	0.540541	0	Russia
18315	G18315A	0.209205	0	0
18329	C18329T	0	0	0.146413	USA
18348	C18348T	0	0	0.146413	Rwanda
18395	C18395T	0.209205	0	0
18445	G18445A	0	0	0.146413	Kenya
18471	T18471C	0.209205	0	0
18473	A18473G	0	0	0.146413	Aruba
18486	C18486T	0	0	0.146413	USA
18493	C18493T	0	0.27027	0	Russia
18508	C18508T	0.209205	0.540541	0	Russia
18538	G18538A	0	0	0.146413	Finland
18543	A18543G	0.209205	0	0
18555	C18555T	0	0.27027	0	Russia
18568	C18568T	0.209205	0	0
18585	A18585C	0	0	0.146413	Moldova
18589	G18589T	0	0	0.146413	ElSalvador
18606	C18606T	1.67364	0	0
18636	G18636T	0	0	0.146413	USA
18647	C18647T	0	0.27027	0.146413	Russia, Spain
18657	C18657T	0	0	0.146413	Lithuania
18673	A18673G	0	0	0.146413	NewZealand
18674	G18674T	0	0	0.146413	NewZealand
18677	G18677A	0	0.27027	0	Russia
18698	C18698T	0.209205	0	0
18699	T18699A	0	0	0.146413	Gambia
18741	T18741C	0.209205	0	0
18744	C18744T	0.209205	0	0.146413	USA
18788	C18788T	0	0.27027	0	Russia
18796	C18796T	0	0	0.146413	Aruba
18828	C18828T	0.83682	0	0
18898	G18898A	0	0	0.146413	Australia
18905	G18905A	0	0	0.439239	NewZealand
18907	G18907T	0.209205	0	0
18912	C18912T	0	0	0.146413	Argentina
18928	C18928T	0.209205	0	0
19063	C19063T	0.209205	0	0
19164	C19164T	0	0.540541	0.146413	Moldova, Russia
19170	C19170T	0	0	0.292826	Peru, USA
19225	T19225G	0.209205	0	0
19255	C19255T	0	0	0.146413	CostaRica
19263	C19263T	0	0	0.439239	Australia, Chile, Palau
19269	C19269T	0	0	0.146413	USA
19374	C19374T	0.209205	0	0
19404	T19404C	0	0	0.146413	Australia
19421	C19421T	0	0.27027	0	Russia
19488	C19488T	0	0	0.146413	CostaRica
19517	T19517C	0	0	0.146413	Ghana
19524	C19524T	0.41841	0	0.292826	Curacao
19550	C19550T	0.209205	0	0
19572	C19572T	0	0	0.146413	Ecuador
19586	C19586T	0.209205	0	0
19590	T19590C	0	0.540541	0	Russia
19626	A19626G	0	0	0.146413	DRC
19632	T19632C	0	0	0.292826	Cambodia, Thailand
19651	A19651G	0.209205	0	0
19673	A19673G	0	0.27027	0	Russia
19696	A19696G	0	0	0.146413	NewZealand
19720	A19720G	0	0.27027	0	Russia
19809	T19809C	0	0	0.146413	USA
19830	A19830G	0	0	0.146413	USA
19854	C19854T	0.209205	0	0.146413	Ireland
19868	C19868T	0	0	0.292826	Belize, CostaRica
19872	G19872T	0	0	0.146413	Botswana
19882	T19882C	0	0	0.146413	USA
19895	C19895T	0.41841	0	0
19983	C19983T	0	0	0.439239	Finland, Latvia
19999	G19999T	0	2.7027	0.292826	Gambia, Mexico, Russia
20006	G20006T	0	0	0.146413	Switzerland
20011	G20011A	0.41841	0.27027	0	Russia
20016	C20016T	0.209205	0	0.146413	France
20069	G20069T	0	0	0.146413	Norway
20099	C20099T	0	0	0.146413	Australia
20107	A20107G	0	0	0.146413	Cameroon
20124	T20124C	0	0	0.146413	Turkey
20130	A20130G	0	0	0.146413	England
20131	G20131A	0.209205	0	0
20178	C20178T	0	0.27027	0.146413	Russia, Spain
20262	A20262G	0	0	0.146413	Canada
20269	G20269T	0	0	0.146413	Mexico
20276	A20276G	0.209205	0	0
20313	C20313A	0.209205	0	0
20320	C20320T	0	0	0.439239	ElSalvador, USA
20323	A20323G	0.41841	0	0
20332	G20332A	0	0.27027	0	Russia
20349	T20349G	0	0	0.146413	USA
20412	A20412G	0	0	0.146413	Spain
20413	T20413C	0.209205	0	0
20418	A20418G	0	0	0.146413	Moldova
20436	C20436T	0.41841	0	0
20452	T20452C	0	0	0.146413	Nigeria
20480	C20480T	0	0	0.146413	Chile
20499	T20499A	0	0	0.146413	USA
20541	A20541T	0	0	0.146413	NewZealand
20544	C20544T	0	0.27027	0	Russia
20629	C20629T	0	0	0.146413	Mexico
20634	A20634C	0.209205	0	0
20666	A20666T	0	0	0.146413	CostaRica
20679	G20679T	0.41841	0	0
20679	G20679A	0	0.540541	0.292826	Mexico, Russia
20682	T20682A	0.209205	0	0
20703	C20703T	0	0	0.292826	Mexico, USA
20743	A20743C	0.209205	0	0
20754	T20754C	0.209205	0.27027	0.439239	Croatia, Macedonia, Montenegro, Russia
20793	A20793G	0	0	0.146413	TrinidadandTobago
20799	T20799C	0.209205	0	0
20823	C20823T	0	0	0.146413	USA
20839	G20839A	0	0.540541	0	Russia
20844	C20844T	0	0	0.146413	England
20937	G20937T	0	0	0.146413	Portugal
20946	C20946T	0.209205	0	0
20956	C20956T	0	0	0.292826	Brazil, Estonia
20961	T20961C	0	0	0.146413	Peru
20964	C20964T	0.209205	0	0.146413	USA
20992	A20992G	0	0	0.146413	HongKong
21000	T21000C	0.209205	0	0
21005	C21005T	0	0	0.146413	Australia
21017	C21017T	0	0.27027	0	Russia
21019	G21019T	0	0	0.146413	Colombia
21034	C21034T	0	0	0.292826	SouthAfrica, Zambia
21045	T21045C	0	0	0.146413	Andorra
21054	C21054T	0	0	0.146413	USA
21057	C21057T	0	0	0.146413	USA
21058	C21058T	0	0.27027	0.146413	Russia, USA
21087	T21087C	0.209205	0	0
21102	T21102C	0.41841	0	0.292826	USA
21108	C21108T	0	0	0.146413	Guadeloupe
21137	A21137G	0	0.27027	0.732064	Australia, Canada, England, Paraguay, Peru, Russia
21141	A21141G	0	0	0.146413	Brunei
21156	C21156T	0	0.27027	0	Russia
21157	G21157A	0.209205	0	0.146413	Australia
21160	G21160A	0	0.27027	0	Russia
21194	A21194C	0.41841	0	0
21216	C21216T	0	0	0.146413	Belgium
21222	A21222G	0	0	0.146413	Mexico
21232	G21232A	0	0.27027	0	Russia
21234	C21234T	0	0	0.146413	Argentina
21254	C21254T	0	0	0.146413	USA
21302	C21302T	0.209205	0	0
21304	C21304A	0.209205	0.27027	0	Russia
21304	C21304T	0	0.27027	0	Russia
21305	G21305A	0.209205	0.27027	0.146413	Russia, USA
21306	C21306T	0	0	0.146413	USA
21357	T21357C	0	0.27027	0	Russia
21365	C21365T	0.41841	0	0.146413	Kenya
21383	A21383T	0	0.27027	0	Russia
21507	A21507G	0.209205	0	0
21516	C21516T	0.209205	0	0
21575	C21575T	1.25523	0.540541	0.292826	ElSalvador, Finland, Russia
21595	C21595T	4.60251	5.94595	22.694	Argentina, Aruba, Australia, Belize, Bonaire, Brazil, Canada, Chile, Colombia, CostaRica, Curacao, Ecuador, ElSalvador, Guadeloupe, Guatemala, Honduras, HongKong, Lebanon, Mexico, Netherlands, NewZealand, Palau, Paraguay, Peru, Russia, Saint-Martin, Singapore, SintMaarten, Slovakia, Slovenia, U,S,VirginIslands, USA, Venezuela
21597	C21597T	0.209205	0	0
21613	T21613A	0	0	0.146413	Canada
21614	C21614T	0	0	0.292826	Canada, Slovenia
21622	C21622T	0.209205	0	0.146413	Nigeria
21623	A21623G	0	0	0.146413	USA
21624	G21624C	0	0.27027	0	Russia
21630	A21630T	0.209205	0	0
21638	C21638T	0	0	0.292826	Brazil, Namibia
21676	C21676T	0	0	0.146413	Brunei
21682	C21682T	0	0.27027	0	Russia
21690	T21690A	0	0.27027	0	Russia
21691	C21691T	0.41841	0	0
21698	T21698A	0	0.27027	0	Russia
21707	C21707T	0.209205	0	0
21721	C21721T	0	0	0.146413	Colombia
21727	C21727T	0	0	0.146413	Mexico
21755	T21755C	0.41841	0	0
21762	C21762T	88.2845	98.9189	95.9004	Algeria, AmericanSamoa, Andorra, AntiguaandBarbuda, Argentina, Aruba, Australia, Azerbaijan, Belgium, Belize, Bermuda, Bonaire, BosniaandHerzegovina, Botswana, Brazil, Brunei, Bulgaria, Cambodia, Cameroon, Canada, Chile, Colombia, Congo, CostaRica, Croatia, Curacao, CzechRepublic, DRC, Djibouti, DominicanRepublic, Ecuador, ElSalvador, England, Estonia, Eswatini, Finland, France, FrenchGuiana, Gam…
21789	C21789T	0	0	0.146413	Netherlands
21799	T21799C	0	0.27027	0	Russia
21855	C21855T	0	0	0.439239	Portugal, Romania, Slovenia
21867	G21867A	0	0	0.146413	USA
21868	A21868C	0.209205	0	0
21906	A21906T	0.627615	0	0
21911	C21911T	0.627615	0	0
21912	T21912A	0.627615	0	0
21913	A21913C	0.627615	0	0
21915	T21915A	0.627615	0	0
21926	A21926G	0.627615	0	0
21928	C21928T	0.627615	0	0
21930	C21930G	0.627615	0	0
21932	A21932G	0.627615	0	0
21933	C21933T	0.627615	0	0
21935	A21935T	0.627615	0	0
21938	G21938T	0.627615	0	0
21942	T21942C	0.627615	0	0
21944	A21944T	0.41841	0	0
21945	T21945C	0.41841	0	0
21946	T21946C	0.41841	0	0
21984	T21984G	0	0	0.439239	Moldova
21985	G21985T	0	0	0.292826	Mozambique
21987	G21987A	0	0	0.292826	Azerbaijan
21988	T21988C	0	0	0.292826	Azerbaijan
21989	G21989C	0	0	0.292826	Azerbaijan
21990	T21990A	0	0	0.292826	Azerbaijan
21991	T21991C	0	0	0.292826	Azerbaijan
21992	T21992A	0	0	0.292826	Azerbaijan
21994	T21994A	0	0	0.292826	Azerbaijan
21995	T21995A	0	0	0.439239	Azerbaijan, Oman
21998	C21998A	0	0	0.292826	Azerbaijan
22000	C22000T	0	0.27027	0.146413	Macedonia, Russia
22000	C22000A	0	0	0.146413	USA
22022	G22022C	0	1.08108	0	Russia
22028	G22028A	0	0	0.146413	USA
22033	C22033A	0	0	0.292826	SouthKorea, USA
22044	C22044T	0	0	0.146413	Mexico
22045	T22045A	0	0	0.146413	USA
22072	T22072C	0	0	0.439239	Bonaire, DominicanRepublic
22076	T22076G	0	0	0.146413	Oman
22081	G22081A	0	0	0.146413	Turkey
22091	A22091G	0	0.540541	0.146413	Belgium, Russia
22127	C22127T	0	0.27027	0	Russia
22185	C22185T	0	0	0.146413	CostaRica
22190	A22190G	0	0	0.146413	Canada
22194	A22194G	0	0	0.439239	Argentina, Australia
22195	T22195G	0	0	0.439239	Belize, Honduras
22197	T22197G	0	0	0.439239	Belize, Honduras
22198	A22198C	0	0	0.439239	Belize, Honduras
22199	G22199T	0	0	0.146413	Kenya
22202	C22202A	0	0	0.439239	Belize, Honduras
22203	G22203A	0.209205	0	0
22204	T22204A	0	0	0.146413	Ecuador
22204	T22204C	0	0	0.439239	Belize, Honduras
22207	T22207G	0	0	0.292826	Brunei
22212	C22212A	0	0	0.146413	USA
22224	C22224T	0	0	0.146413	Belgium
22250	C22250T	0	0	0.146413	Mexico
22259	A22259G	0	0	0.146413	Japan
22261	T22261C	0.41841	0	0
22264	C22264T	0	0.540541	0	Russia
22281	C22281T	0	0.27027	0	Russia
22314	C22314T	0	0	0.146413	Mexico
22323	C22323T	0	0.27027	0	Russia
22326	C22326T	0	0	0.146413	Mexico
22343	G22343A	0.209205	0	0
22388	C22388T	0	0	0.146413	ElSalvador
22444	C22444T	0	0.27027	0	Russia
22458	C22458T	0.209205	0	0
22498	C22498A	0	1.08108	0	Russia
22533	A22533G	0	0	0.146413	Mexico
22561	A22561G	0	0	0.146413	Chile
22578	G22578A	95.1883	100	94.7291	Algeria, AmericanSamoa, Andorra, Argentina, Aruba, Australia, Azerbaijan, Belgium, Belize, Bermuda, Bonaire, BosniaandHerzegovina, Botswana, Brazil, Brunei, Bulgaria, Cambodia, Cameroon, Canada, Chile, Colombia, Congo, CostaRica, Croatia, Curacao, CzechRepublic, DRC, Djibouti, DominicanRepublic, Ecuador, ElSalvador, England, Estonia, Eswatini, Finland, France, FrenchGuiana, Gambia, Georgia, Germa…
22599	G22599A	60.4603	73.7838	48.0234	AmericanSamoa, AntiguaandBarbuda, Argentina, Aruba, Australia, Azerbaijan, Belgium, Belize, Bonaire, Botswana, Brazil, Bulgaria, Cambodia, Cameroon, Canada, Chile, Colombia, CostaRica, Croatia, Curacao, CzechRepublic, DRC, Djibouti, Ecuador, ElSalvador, England, Estonia, Eswatini, Finland, France, Gambia, Georgia, Germany, Greece, Guadeloupe, Guatemala, Honduras, HongKong, Hungary, Iran, Ireland,…
22624	C22624T	0	0.27027	0	Russia
22664	C22664A	0.209205	0	0
22673	T22673C	93.9331	100	89.019	AmericanSamoa, Andorra, AntiguaandBarbuda, Argentina, Aruba, Australia, Azerbaijan, Belgium, Belize, Bermuda, Bonaire, BosniaandHerzegovina, Botswana, Brazil, Brunei, Bulgaria, Cambodia, Cameroon, Canada, Chile, Congo, CostaRica, Croatia, Curacao, CzechRepublic, DRC, Djibouti, DominicanRepublic, Ecuador, ElSalvador, England, Estonia, Eswatini, Finland, France, FrenchGuiana, Gambia, Georgia, Germa…
22674	C22674T	93.9331	100	89.019	AmericanSamoa, Andorra, AntiguaandBarbuda, Argentina, Aruba, Australia, Azerbaijan, Belgium, Belize, Bermuda, Bonaire, BosniaandHerzegovina, Botswana, Brazil, Brunei, Bulgaria, Cambodia, Cameroon, Canada, Chile, Congo, CostaRica, Croatia, Curacao, CzechRepublic, DRC, Djibouti, DominicanRepublic, Ecuador, ElSalvador, England, Estonia, Eswatini, Finland, France, FrenchGuiana, Gambia, Georgia, Germa…
22679	T22679C	94.1423	100	89.4583	AmericanSamoa, Andorra, AntiguaandBarbuda, Argentina, Aruba, Australia, Azerbaijan, Belgium, Belize, Bermuda, Bonaire, BosniaandHerzegovina, Botswana, Brazil, Brunei, Bulgaria, Cambodia, Cameroon, Canada, Chile, Congo, CostaRica, Croatia, Curacao, CzechRepublic, DRC, Djibouti, DominicanRepublic, Ecuador, ElSalvador, England, Estonia, Eswatini, Finland, France, FrenchGuiana, Gambia, Georgia, Germa…
22686	C22686T	70.7113	100	88.287	AmericanSamoa, Andorra, AntiguaandBarbuda, Argentina, Aruba, Australia, Azerbaijan, Belgium, Belize, Bermuda, Bonaire, BosniaandHerzegovina, Botswana, Brazil, Brunei, Bulgaria, Cambodia, Cameroon, Canada, Chile, Congo, CostaRica, Croatia, Curacao, CzechRepublic, DRC, Djibouti, DominicanRepublic, Ecuador, ElSalvador, England, Estonia, Eswatini, Finland, France, FrenchGuiana, Gambia, Georgia, Germa…
22688	A22688G	0	0	0.146413	env
22747	C22747T	0.209205	0.27027	0	Russia
22775	G22775A	0	0	0.146413	USA
22792	C22792T	0	0	0.439239	Australia
22813	G22813T	99.7908	10.2703	83.0161	AmericanSamoa, Andorra, Argentina, Aruba, Australia, Azerbaijan, Belgium, Belize, Bermuda, Bonaire, BosniaandHerzegovina, Botswana, Brazil, Brunei, Bulgaria, Cambodia, Cameroon, Canada, Chile, Congo, CostaRica, Croatia, Curacao, CzechRepublic, DRC, Djibouti, DominicanRepublic, Ecuador, ElSalvador, England, Estonia, Eswatini, Finland, France, FrenchGuiana, Gambia, Germany, Ghana, Greece, Guadeloup…
22851	C22851T	0.209205	0	0
22855	C22855T	0	0	0.146413	Portugal
22858	C22858T	0	0.27027	0	Russia
22876	T22876G	0.209205	0	0
22879	C22879T	0.209205	0	0.292826	NewZealand, USA
22879	C22879G	0	0.27027	0	Russia
22882	T22882G	99.1632	10.8108	83.4553	AmericanSamoa, Andorra, Argentina, Aruba, Australia, Azerbaijan, Belgium, Belize, Bermuda, Bonaire, BosniaandHerzegovina, Botswana, Brazil, Brunei, Bulgaria, Cambodia, Cameroon, Canada, Chile, Colombia, Congo, CostaRica, Croatia, Curacao, CzechRepublic, DRC, Djibouti, DominicanRepublic, Ecuador, ElSalvador, England, Estonia, Eswatini, Finland, France, FrenchGuiana, Gambia, Germany, Ghana, Greece,…
22895	G22895T	0	0	0.146413	Djibouti
22898	G22898A	99.1632	11.0811	85.6515	AmericanSamoa, Andorra, Argentina, Aruba, Australia, Azerbaijan, Belgium, Belize, Bermuda, Bonaire, BosniaandHerzegovina, Botswana, Brazil, Brunei, Bulgaria, Cambodia, Cameroon, Canada, Chile, Colombia, Congo, CostaRica, Croatia, Curacao, CzechRepublic, DRC, Djibouti, DominicanRepublic, Ecuador, ElSalvador, England, Estonia, Eswatini, Finland, France, FrenchGuiana, Gambia, Germany, Ghana, Greece,…
22916	C22916T	0	0	0.146413	Morocco
22917	T22917G	0	6.75676	0	Russia
22987	C22987T	0.209205	0	0
22992	G22992A	27.1967	100	90.0439	AmericanSamoa, Andorra, AntiguaandBarbuda, Argentina, Aruba, Australia, Azerbaijan, Belgium, Belize, Bermuda, Bonaire, BosniaandHerzegovina, Botswana, Brazil, Brunei, Bulgaria, Cambodia, Cameroon, Canada, Chile, Colombia, Congo, CostaRica, Croatia, Curacao, CzechRepublic, DRC, Djibouti, DominicanRepublic, Ecuador, ElSalvador, England, Estonia, Eswatini, Finland, France, FrenchGuiana, Gambia, Geor…
22995	C22995A	28.2427	100	89.8975	AmericanSamoa, Andorra, AntiguaandBarbuda, Argentina, Aruba, Australia, Azerbaijan, Belgium, Belize, Bermuda, Bonaire, BosniaandHerzegovina, Botswana, Brazil, Brunei, Bulgaria, Cambodia, Cameroon, Canada, Chile, Colombia, Congo, CostaRica, Croatia, Curacao, CzechRepublic, DRC, Djibouti, DominicanRepublic, Ecuador, ElSalvador, England, Estonia, Eswatini, Finland, France, FrenchGuiana, Gambia, Geor…
23013	A23013C	29.2887	100	89.4583	AmericanSamoa, Andorra, AntiguaandBarbuda, Argentina, Aruba, Australia, Azerbaijan, Belgium, Belize, Bermuda, Bonaire, BosniaandHerzegovina, Botswana, Brazil, Brunei, Bulgaria, Cambodia, Cameroon, Canada, Chile, Colombia, Congo, CostaRica, Croatia, Curacao, CzechRepublic, DRC, Djibouti, DominicanRepublic, Ecuador, ElSalvador, England, Estonia, Eswatini, Finland, France, FrenchGuiana, Gambia, Geor…
23101	T23101C	0	0	0.146413	Australia
23119	T23119C	0	0	0.146413	Cameroon
23126	G23126C	0	0	0.146413	Mexico
23176	T23176C	0	0	0.146413	Australia
23191	C23191T	0	0.27027	0	Russia
23202	C23202A	93.9331	100	99.5608	Algeria, AmericanSamoa, Andorra, AntiguaandBarbuda, Argentina, Aruba, Australia, Azerbaijan, Belgium, Belize, Bermuda, Bonaire, BosniaandHerzegovina, Botswana, Brazil, Brunei, Bulgaria, Cambodia, Cameroon, Canada, Chile, Colombia, Congo, CostaRica, Croatia, Curacao, CzechRepublic, DRC, Djibouti, DominicanRepublic, Ecuador, ElSalvador, England, Estonia, Eswatini, Finland, France, FrenchGuiana, Gam…
23220	C23220T	0	0	0.146413	SouthAfrica
23230	C23230T	0	0	0.146413	Canada
23236	G23236T	0	0	0.146413	Guadeloupe
23323	T23323C	0	0	0.146413	USA
23379	A23379G	0	0	0.146413	Australia
23403	A23403G	100	100	100	Algeria, AmericanSamoa, Andorra, AntiguaandBarbuda, Argentina, Aruba, Australia, Azerbaijan, Belgium, Belize, Bermuda, Bonaire, BosniaandHerzegovina, Botswana, Brazil, Brunei, Bulgaria, Cambodia, Cameroon, Canada, Chile, Colombia, Congo, CostaRica, Croatia, Curacao, CzechRepublic, DRC, Djibouti, DominicanRepublic, Ecuador, ElSalvador, England, Estonia, Eswatini, Finland, France, FrenchGuiana, Gam…
23410	C23410T	0.209205	0.27027	0.146413	Russia, Syria
23422	C23422T	0.209205	0	0
23436	A23436G	0	0	0.146413	NorthernMarianaIslands
23487	T23487C	0.209205	0	0
23488	T23488C	0	0	0.146413	Luxembourg
23489	T23489C	4.39331	4.86486	1.1713	BosniaandHerzegovina, Croatia, CzechRepublic, Jordan, Macedonia, Netherlands, NewZealand, Russia
23501	G23501T	0	0	0.439239	Canada, Rwanda
23525	C23525T	99.5816	99.7297	99.8536	Algeria, AmericanSamoa, Andorra, AntiguaandBarbuda, Argentina, Aruba, Australia, Azerbaijan, Belgium, Belize, Bermuda, Bonaire, BosniaandHerzegovina, Botswana, Brazil, Brunei, Bulgaria, Cambodia, Cameroon, Canada, Chile, Colombia, Congo, CostaRica, Croatia, Curacao, CzechRepublic, DRC, Djibouti, DominicanRepublic, Ecuador, ElSalvador, England, Estonia, Eswatini, Finland, France, FrenchGuiana, Gam…
23536	C23536T	0	0	0.146413	SaudiArabia
23570	A23570G	0	0.27027	0	Russia
23583	A23583T	0	0.27027	0	Russia
23590	T23590G	0	0	0.146413	USA
23595	C23595T	0	0	0.146413	Australia
23599	T23599G	99.1632	99.7297	99.7072	Algeria, AmericanSamoa, Andorra, AntiguaandBarbuda, Argentina, Aruba, Australia, Azerbaijan, Belgium, Belize, Bermuda, Bonaire, BosniaandHerzegovina, Botswana, Brazil, Brunei, Bulgaria, Cambodia, Cameroon, Canada, Chile, Colombia, Congo, CostaRica, Croatia, Curacao, CzechRepublic, DRC, Djibouti, DominicanRepublic, Ecuador, ElSalvador, England, Estonia, Eswatini, Finland, France, FrenchGuiana, Gam…
23604	C23604A	99.3724	99.7297	99.4143	Algeria, AmericanSamoa, Andorra, AntiguaandBarbuda, Argentina, Aruba, Australia, Azerbaijan, Belgium, Belize, Bermuda, Bonaire, BosniaandHerzegovina, Botswana, Brazil, Brunei, Bulgaria, Cambodia, Cameroon, Canada, Chile, Colombia, Congo, CostaRica, Croatia, Curacao, CzechRepublic, DRC, Djibouti, DominicanRepublic, Ecuador, ElSalvador, England, Estonia, Eswatini, Finland, France, FrenchGuiana, Gam…
23631	A23631G	0	0.27027	0	Russia
23631	A23631T	0	0.27027	0	Russia
23633	T23633C	0	0	0.146413	CostaRica
23636	A23636G	0	0	0.146413	USA
23638	C23638T	0	0.810811	0	Russia
23644	C23644T	0	0.27027	0	Russia
23647	C23647T	0	0	0.146413	Australia
23664	C23664T	5.43933	2.43243	3.95315	Argentina, BosniaandHerzegovina, Brunei, Bulgaria, Canada, Colombia, Croatia, CzechRepublic, England, FrenchGuiana, Hungary, Ireland, Italy, Jordan, Kenya, Luxembourg, Macedonia, Moldova, Netherlands, NewZealand, Portugal, Romania, Russia, Zambia
23709	C23709T	0	0	0.146413	USA
23740	T23740A	0	0.27027	0	Russia
23763	C23763T	0.209205	0	0
23769	T23769G	0	0	0.146413	Poland
23773	T23773C	0	0	0.146413	CostaRica
23782	G23782T	0	0	0.146413	Saint-Martin
23798	T23798G	0	0.27027	0	Russia
23800	A23800T	0	0	0.146413	France
23812	C23812A	0	0.27027	0	Russia
23814	A23814G	0	0.27027	0	Russia
23825	C23825A	0	0.27027	0	Russia
23831	G23831T	0	0.27027	0	Russia
23841	G23841A	0	0.27027	0	Russia
23854	C23854A	95.8159	19.4595	98.0966	Algeria, AmericanSamoa, Andorra, Argentina, Aruba, Australia, Azerbaijan, Belgium, Belize, Bermuda, Bonaire, BosniaandHerzegovina, Botswana, Brazil, Brunei, Bulgaria, Cambodia, Cameroon, Canada, Chile, Colombia, Congo, CostaRica, Croatia, Curacao, CzechRepublic, DRC, Djibouti, DominicanRepublic, Ecuador, ElSalvador, England, Estonia, Eswatini, Finland, France, FrenchGuiana, Gambia, Germany, Ghana…
23934	C23934T	0	0	0.292826	Slovenia, Switzerland
23948	G23948T	90.795	98.3784	99.1215	Algeria, AmericanSamoa, Andorra, AntiguaandBarbuda, Argentina, Aruba, Australia, Azerbaijan, Belgium, Belize, Bermuda, Bonaire, BosniaandHerzegovina, Botswana, Brazil, Brunei, Bulgaria, Cambodia, Cameroon, Canada, Chile, Colombia, Congo, CostaRica, Croatia, Curacao, CzechRepublic, DRC, Djibouti, DominicanRepublic, Ecuador, ElSalvador, England, Estonia, Eswatini, Finland, France, FrenchGuiana, Gam…
23974	A23974T	0	0.27027	0	Russia
23997	C23997A	0	0.27027	0	Russia
24022	T24022C	0.209205	0	0
24034	C24034T	0	0.27027	0.146413	Russia, USA
24053	G24053A	0.209205	0	0
24054	C24054T	0	0	0.146413	HongKong
24055	T24055A	0	0	0.146413	Canada
24087	G24087A	0.209205	0	0
24094	T24094A	0	0	0.146413	Canada
24095	G24095T	0	0.27027	0	Russia
24100	T24100C	0.209205	0	0
24103	A24103G	0	0	0.146413	USA
24120	A24120G	0	0	0.146413	Australia
24121	A24121C	0	0	0.146413	USA
24130	C24130A	96.2343	98.3784	99.7072	Algeria, AmericanSamoa, Andorra, AntiguaandBarbuda, Argentina, Aruba, Australia, Azerbaijan, Belgium, Belize, Bermuda, Bonaire, BosniaandHerzegovina, Botswana, Brazil, Brunei, Bulgaria, Cambodia, Cameroon, Canada, Chile, Colombia, Congo, CostaRica, Croatia, Curacao, CzechRepublic, DRC, Djibouti, DominicanRepublic, Ecuador, ElSalvador, England, Estonia, Eswatini, Finland, France, FrenchGuiana, Gam…
24326	T24326C	0.83682	0	0
24358	C24358A	0	0	0.146413	USA
24378	C24378T	0.209205	0	0
24381	C24381T	0.209205	0.27027	0	Russia
24382	C24382T	0	0	0.146413	Mexico
24424	A24424T	78.2427	99.7297	100	Algeria, AmericanSamoa, Andorra, AntiguaandBarbuda, Argentina, Aruba, Australia, Azerbaijan, Belgium, Belize, Bermuda, Bonaire, BosniaandHerzegovina, Botswana, Brazil, Brunei, Bulgaria, Cambodia, Cameroon, Canada, Chile, Colombia, Congo, CostaRica, Croatia, Curacao, CzechRepublic, DRC, Djibouti, DominicanRepublic, Ecuador, ElSalvador, England, Estonia, Eswatini, Finland, France, FrenchGuiana, Gam…
24445	G24445A	0	0	0.146413	Australia
24448	T24448C	0	0	0.292826	Guadeloupe, Mexico
24469	T24469A	71.7573	100	99.4143	Algeria, AmericanSamoa, Andorra, AntiguaandBarbuda, Argentina, Aruba, Australia, Azerbaijan, Belgium, Belize, Bermuda, Bonaire, BosniaandHerzegovina, Botswana, Brazil, Brunei, Bulgaria, Cambodia, Cameroon, Canada, Chile, Colombia, Congo, CostaRica, Croatia, Curacao, CzechRepublic, DRC, Djibouti, DominicanRepublic, Ecuador, ElSalvador, England, Estonia, Eswatini, Finland, France, FrenchGuiana, Gam…
24503	C24503T	73.0126	100	99.7072	Algeria, AmericanSamoa, Andorra, AntiguaandBarbuda, Argentina, Aruba, Australia, Azerbaijan, Belgium, Belize, Bermuda, Bonaire, BosniaandHerzegovina, Botswana, Brazil, Brunei, Bulgaria, Cambodia, Cameroon, Canada, Chile, Colombia, Congo, CostaRica, Croatia, Curacao, CzechRepublic, DRC, Djibouti, DominicanRepublic, Ecuador, ElSalvador, England, Estonia, Eswatini, Finland, France, FrenchGuiana, Gam…
24519	A24519G	0	0	0.146413	DominicanRepublic
24521	G24521T	0	0	0.146413	Argentina
24565	T24565A	0	0.27027	0	Russia
24566	C24566A	0	0.27027	0	Russia
24572	T24572A	0	0.27027	0	Russia
24616	C24616T	0.209205	0	0
24634	T24634A	0.209205	0	0
24660	T24660G	0	1.08108	0	Russia
24715	C24715T	0	0	0.146413	USA
24751	G24751A	0	0.27027	0	Russia
24771	C24771T	0.41841	0	0
24803	A24803G	0	0.810811	0.732064	Australia, Congo, England, Guinea, Russia
24812	G24812T	0	0	0.146413	Italy
24815	G24815A	0	0	0.146413	USA
24853	A24853T	0	0.27027	0	Russia
24854	A24854T	0	1.08108	0	Russia
24863	C24863T	0	0.810811	0	Russia
24912	C24912T	0	0	0.146413	Peru
24959	G24959A	0	0	0.146413	Luxembourg
25000	C25000T	97.4895	100	97.2182	Algeria, AmericanSamoa, Andorra, AntiguaandBarbuda, Argentina, Aruba, Australia, Azerbaijan, Belgium, Belize, Bermuda, Bonaire, BosniaandHerzegovina, Botswana, Brazil, Brunei, Bulgaria, Cambodia, Cameroon, Canada, Chile, Colombia, Congo, CostaRica, Croatia, Curacao, CzechRepublic, DRC, Djibouti, DominicanRepublic, Ecuador, ElSalvador, England, Estonia, Eswatini, Finland, France, FrenchGuiana, Gam…
25008	A25008T	0	0.27027	0	Russia
25037	C25037T	0.209205	0	0
25039	T25039C	0	0	0.146413	NewZealand
25056	A25056G	0	0	0.146413	Luxembourg
25063	T25063C	0	0	0.146413	Portugal
25069	C25069T	0	0	0.146413	Australia
25071	C25071A	0.209205	0.27027	0	Russia
25073	G25073T	0	0	0.146413	Paraguay
25076	A25076G	0.209205	0	0
25078	T25078C	0	0	0.146413	Pakistan
25176	A25176G	0	0	0.146413	Mexico
25186	G25186T	0.209205	0	0
25189	T25189C	0.41841	0	0
25200	C25200A	0	0.27027	0	Russia
25209	T25209G	0	0	0.146413	Finland
25216	A25216G	0.209205	0	0
25217	G25217T	0	0	0.146413	Guinea
25244	G25244T	0	0	0.146413	Curacao
25276	C25276A	0	0.27027	0	Russia
25276	C25276T	0	0	0.292826	Botswana, Guadeloupe
25290	G25290T	0	0	0.146413	Greece
25300	C25300T	0.209205	0	0
25312	T25312C	0	0.27027	0	Russia
25317	C25317T	0	0	0.146413	Mexico
25321	C25321T	0	0	0.146413	Australia
25339	C25339T	0	0	0.146413	Australia
25341	A25341G	0	0.540541	0	Russia
25350	C25350T	0.627615	0.540541	0	Russia
25352	G25352A	0.209205	0	0
25363	A25363G	0	0	0.146413	Slovenia
25378	C25378T	0.209205	0	0
25427	C25427T	0	0	0.146413	USA
25429	G25429C	0.209205	0	0
25437	G25437T	0	0	0.292826	Argentina, USA
25452	C25452T	0	0	1.61054	Australia
25455	G25455T	0.209205	0.27027	0	Russia
25456	G25456T	0.209205	0	0
25471	G25471C	0.41841	0	0
25471	G25471T	0	0	0.146413	Guinea
25513	C25513T	0.209205	0	0
25538	G25538T	0	0	0.146413	Peru
25539	C25539T	0	0	0.146413	Guatemala
25546	C25546T	0	0	0.146413	Sweden
25553	C25553T	0.209205	0	0
25555	G25555T	0	0	0.146413	Argentina
25558	T25558C	0.41841	0	0
25571	C25571T	0.41841	0.540541	0.292826	Australia, Kenya, Russia
25572	C25572A	0	0	0.146413	Brazil
25576	A25576T	0	0	0.146413	Guadeloupe
25583	C25583T	0	0.27027	0	Russia
25584	C25584T	65.8996	100	99.7072	Algeria, AmericanSamoa, Andorra, AntiguaandBarbuda, Argentina, Aruba, Australia, Azerbaijan, Belgium, Belize, Bermuda, Bonaire, BosniaandHerzegovina, Botswana, Brazil, Brunei, Bulgaria, Cambodia, Cameroon, Canada, Chile, Colombia, Congo, CostaRica, Croatia, Curacao, CzechRepublic, DRC, Djibouti, DominicanRepublic, Ecuador, ElSalvador, England, Estonia, Eswatini, Finland, France, FrenchGuiana, Gam…
25589	A25589T	0	0.27027	0	Russia
25594	A25594G	0	0.27027	0	Russia
25603	C25603T	0	0	0.146413	Mexico
25608	A25608T	0	0.27027	0	Russia
25611	C25611T	0	0.27027	0	Russia
25617	G25617T	0	0	0.146413	Rwanda
25641	G25641A	0	0	0.146413	Peru
25642	C25642T	0	0	0.146413	Luxembourg
25667	C25667T	0	0	0.146413	Spain
25672	C25672T	0	0.27027	0	Russia
25699	G25699C	0	0	0.146413	Canada
25703	C25703T	0	0	0.146413	Paraguay
25708	C25708T	7.11297	6.21622	8.93119	Andorra, Argentina, Aruba, Australia, Bonaire, Cameroon, Colombia, Congo, CostaRica, Curacao, ElSalvador, England, Guinea, India, Mexico, NewZealand, NorthernMarianaIslands, Norway, Paraguay, Peru, Portugal, Russia, TrinidadandTobago, USA, Zhejiang
25710	C25710T	0	0	0.292826	Curacao, USA
25711	T25711C	0	0	0.146413	Iran
25714	C25714T	0	0	0.146413	CostaRica
25728	C25728T	0	0.27027	0	Russia
25767	G25767T	0	0	0.146413	USA
25776	G25776T	0	0	0.146413	SouthAfrica
25782	C25782T	0.209205	0.540541	0	Russia
25788	A25788T	0	0.27027	0	Russia
25798	A25798T	0	0.27027	0	Russia
25799	A25799T	0	0.27027	0	Russia
25824	C25824T	0	0	0.146413	Chile
25844	C25844T	0.209205	6.21622	0	Russia
25855	G25855T	1.04603	0.540541	0.878477	Belgium, Croatia, France, Guadeloupe, Hungary, Russia
25886	C25886T	0.41841	0.540541	1.90337	Argentina, Bonaire, CostaRica, Curacao, ElSalvador, Mexico, Peru, Russia, USA
25889	C25889T	0	0	0.146413	Mozambique
25904	C25904T	0	0	0.146413	Greece
25906	G25906T	0	0	0.146413	Australia
25912	G25912T	0	1.35135	0	Russia
25916	C25916T	0	0.27027	0	Russia
25919	C25919T	0	0	0.146413	USA
25922	G25922A	0	0.27027	0	Russia
25947	G25947T	0.41841	0	0.146413	Australia
25964	A25964T	0.209205	0	0
25998	A25998G	0	0	0.146413	USA
26013	C26013T	0	0.27027	0	Russia
26028	C26028T	0	0	0.146413	Palau
26038	T26038C	0.209205	0	0
26060	C26060T	0	0	0.146413	USA
26078	C26078T	0	1.62162	0.146413	Greece, Russia
26105	A26105C	0	0	0.146413	Estonia
26115	A26115C	0	0	0.146413	Germany
26124	C26124T	0.209205	0	0.146413	USA
26131	C26131T	0	0	0.146413	Rwanda
26151	C26151T	0.209205	0	0
26152	G26152A	0.209205	0	0
26204	C26204T	0	0	0.146413	Mexico
26212	C26212T	0	0	0.146413	Latvia
26217	G26217A	0	0.27027	0	Russia
26230	G26230T	0	0	0.146413	Australia
26256	C26256T	0	0.27027	0	Russia
26262	G26262A	0	0	0.146413	Kenya
26270	C26270T	100	100	99.4143	Algeria, AmericanSamoa, AntiguaandBarbuda, Argentina, Aruba, Australia, Azerbaijan, Belgium, Belize, Bermuda, Bonaire, BosniaandHerzegovina, Botswana, Brazil, Brunei, Bulgaria, Cambodia, Cameroon, Canada, Chile, Colombia, Congo, CostaRica, Croatia, Curacao, CzechRepublic, DRC, Djibouti, DominicanRepublic, Ecuador, ElSalvador, England, Estonia, Eswatini, Finland, France, FrenchGuiana, Gambia, Geor…
26296	C26296A	0	0.540541	0	Russia
26358	A26358T	0	0.27027	0	Russia
26358	A26358C	0	0.27027	0	Russia
26358	A26358G	0	0.27027	0	Russia
26374	T26374G	0	0.27027	0	Russia
26381	T26381G	0	0.27027	0	Russia
26395	C26395T	0	0.27027	0	Russia
26395	C26395A	0	0.27027	0	Russia
26408	C26408T	0.627615	0	0.292826	Bermuda
26421	C26421T	0	0.27027	0	Russia
26434	A26434T	0	0.27027	0	Russia
26436	T26436C	0.209205	0	0
26453	T26453C	0.209205	0	0
26456	C26456T	0	0.540541	0	Russia
26464	C26464T	0	0.27027	0	Russia
26488	T26488G	0.209205	0	0
26491	T26491C	0.209205	0	0
26492	A26492T	0.209205	0	0
26494	T26494A	0	0.27027	0	Russia
26497	T26497C	0.209205	0	0
26501	G26501T	0	0	0.146413	CostaRica
26522	C26522T	2.71967	2.43243	1.1713	Bonaire, England, Malaysia, Oman, Russia, SaudiArabia, Serbia
26530	A26530G	88.9121	88.6486	91.2152	AmericanSamoa, Argentina, Aruba, Australia, Azerbaijan, Belgium, Belize, Bermuda, Bonaire, BosniaandHerzegovina, Botswana, Brazil, Brunei, Bulgaria, Cambodia, Cameroon, Canada, Chile, Colombia, Congo, CostaRica, Croatia, Curacao, CzechRepublic, DRC, Djibouti, DominicanRepublic, Ecuador, ElSalvador, England, Estonia, Eswatini, Finland, France, FrenchGuiana, Gambia, Germany, Ghana, Greece, Guadelou…
26534	C26534T	0	0	0.146413	Suriname
26546	T26546G	0	0	0.146413	Finland
26549	C26549T	0	0.27027	0	Russia
26571	C26571T	0	0	0.146413	USA
26577	C26577G	61.5063	61.8919	95.754	Algeria, AmericanSamoa, AntiguaandBarbuda, Argentina, Aruba, Australia, Azerbaijan, Belgium, Belize, Bermuda, Bonaire, BosniaandHerzegovina, Botswana, Brazil, Brunei, Bulgaria, Cambodia, Cameroon, Canada, Chile, Colombia, Congo, CostaRica, Croatia, Curacao, CzechRepublic, DRC, Djibouti, DominicanRepublic, Ecuador, ElSalvador, England, Estonia, Eswatini, Finland, France, FrenchGuiana, Gambia, Germ…
26625	C26625T	0	0.27027	0	Russia
26660	G26660T	0.41841	0	0
26667	A26667G	0	0	0.146413	Chile
26678	T26678C	0	0.27027	0	Russia
26681	C26681T	0.627615	0.540541	0.146413	Canada, Russia
26709	G26709A	97.9079	90.8108	98.243	Algeria, AmericanSamoa, AntiguaandBarbuda, Argentina, Aruba, Australia, Azerbaijan, Belgium, Belize, Bermuda, Bonaire, BosniaandHerzegovina, Botswana, Brazil, Brunei, Bulgaria, Cambodia, Cameroon, Canada, Chile, Colombia, CostaRica, Croatia, Curacao, CzechRepublic, DRC, Djibouti, DominicanRepublic, Ecuador, ElSalvador, England, Estonia, Eswatini, Finland, France, FrenchGuiana, Gambia, Germany, Gh…
26738	A26738G	0	0	0.146413	Mexico
26750	C26750T	0	0	0.146413	England
26754	G26754A	0	0	0.146413	CostaRica
26756	T26756A	0	1.08108	0	Russia
26759	A26759C	0	0.27027	0	Russia
26767	T26767C	0	8.10811	0	Russia
26786	A26786T	0	1.89189	0	Russia
26792	G26792A	0	0	0.146413	Mexico
26801	C26801T	0	0	0.146413	Rwanda
26822	C26822T	0	0	0.146413	Australia
26833	C26833T	0.627615	0	0.146413	Romania
26846	C26846T	0	0	0.146413	Bonaire
26855	A26855G	0	0.810811	0	Russia
26858	C26858T	0.209205	0	0.146413	USA
26859	A26859G	0	0.27027	0	Russia
26862	C26862T	0	0.27027	0	Russia
26865	G26865T	0	0.27027	0	Russia
26873	C26873T	0	0.27027	0.146413	Russia, USA
26892	C26892T	0	0	0.146413	Mexico
26918	G26918T	0	0.27027	0	Russia
26927	A26927G	0	0	0.146413	Macedonia
26948	T26948C	0	0	0.146413	Mexico
26951	G26951T	0	0	0.146413	Turkey
26959	G26959A	0	0	0.146413	USA
26966	T26966C	0.209205	0	0
26985	C26985T	0.209205	0	0
26996	C26996T	0	0	0.146413	SouthKorea
27011	C27011T	0	0	0.146413	Botswana
27012	C27012T	0.209205	0	0
27059	C27059T	0.209205	0	0
27083	A27083G	0	0	0.146413	Rwanda
27092	C27092T	0	0	0.146413	USA
27112	G27112A	0.209205	0	0
27128	C27128T	0	0.27027	0	Russia
27131	C27131T	0	0	0.146413	Ireland
27147	G27147T	0.209205	0	0
27151	A27151T	0	0.810811	0	Russia
27223	C27223A	0	0	0.146413	Mexico
27257	T27257A	0.209205	0	0
27259	A27259C	99.3724	100	99.8536	Algeria, AmericanSamoa, Andorra, AntiguaandBarbuda, Argentina, Aruba, Australia, Azerbaijan, Belgium, Belize, Bermuda, Bonaire, BosniaandHerzegovina, Botswana, Brazil, Brunei, Bulgaria, Cambodia, Cameroon, Canada, Chile, Colombia, Congo, CostaRica, Croatia, Curacao, CzechRepublic, DRC, Djibouti, DominicanRepublic, Ecuador, ElSalvador, England, Estonia, Eswatini, Finland, France, FrenchGuiana, Gam…
27261	G27261A	0.209205	0	0
27261	G27261T	0.209205	0	0
27265	T27265C	0.209205	0	0
27294	C27294T	0	0.810811	0.146413	Mexico, Russia
27303	C27303T	0	0	0.146413	Syria
27366	G27366A	0	0	0.146413	USA
27382	G27382C	0.209205	0	0.292826	Greece, Malaysia
27382	G27382T	0	0.27027	0	Russia
27383	A27383T	0.209205	0	0.292826	Greece, Malaysia
27384	T27384C	0.209205	0.810811	1.1713	Belize, Germany, Greece, Malaysia, Peru, Russia, Spain, USA
27389	C27389T	0	0.27027	0	Russia
27413	T27413C	0	0.27027	0.146413	Colombia, Russia
27414	G27414A	0	0	0.146413	Switzerland
27415	G27415A	0.209205	0	0
27416	C27416T	0	0.27027	0	Russia
27427	C27427A	0	0	0.146413	Colombia
27434	C27434T	0	0	0.146413	Mexico
27442	C27442T	0	0	0.146413	Syria
27469	G27469T	0.209205	0	0
27476	C27476T	0	0	0.146413	Ireland
27481	C27481T	0	0	0.146413	NorthernMarianaIslands
27494	C27494T	0	0.27027	0	Russia
27509	C27509G	0	0	0.292826	Mexico, USA
27509	C27509T	0	0	0.146413	FrenchGuiana
27513	C27513T	0	0.27027	0	Russia
27519	C27519T	0	0	0.146413	USA
27527	C27527T	0	0	0.146413	USA
27532	C27532T	0	0	0.146413	Spain
27542	C27542A	0.209205	0	0
27564	T27564C	0	0	0.146413	Australia
27583	G27583T	0	0	0.146413	Zambia
27588	T27588C	0	0	0.146413	Serbia
27592	T27592C	0	0	0.146413	USA
27595	C27595T	0	0	0.146413	Greece
27610	C27610T	0	0	0.146413	Mexico
27630	C27630T	0	0	0.146413	NorthernMarianaIslands
27657	C27657T	0.209205	0	0
27686	C27686T	0.209205	0	0
27688	C27688T	0.41841	0	0
27735	C27735T	0.209205	0	0
27739	C27739T	0	0.27027	0	Russia
27741	C27741T	0	0.810811	0.146413	Mongolia, Russia
27742	A27742C	0	0	0.146413	Malta
27756	A27756G	0	0	0.146413	Norway
27762	G27762T	0.41841	0	0.146413	Spain
27769	C27769T	0	0.27027	0	Russia
27788	G27788T	0	0	0.146413	CostaRica
27797	A27797G	0.209205	0	0
27798	G27798T	0.209205	0	0
27807	C27807T	98.5356	99.4595	98.9751	Algeria, AmericanSamoa, Andorra, AntiguaandBarbuda, Argentina, Aruba, Australia, Azerbaijan, Belgium, Belize, Bermuda, Bonaire, BosniaandHerzegovina, Botswana, Brazil, Brunei, Bulgaria, Cambodia, Cameroon, Canada, Chile, Colombia, Congo, CostaRica, Croatia, Curacao, CzechRepublic, DRC, Djibouti, DominicanRepublic, Ecuador, ElSalvador, England, Estonia, Eswatini, Finland, France, FrenchGuiana, Gam…
27809	A27809T	0	0	0.146413	Australia
27811	T27811A	0	0.27027	0	Russia
27812	C27812A	0	0.27027	0	Russia
27840	T27840C	0.41841	0	0
27847	C27847T	0	0	0.146413	Canada
27850	T27850C	0	0	0.146413	India
27851	T27851A	0	0	0.146413	India
27852	G27852C	0	0	0.146413	India
27864	C27864A	0	0	0.146413	ElSalvador
27874	C27874T	0	0	0.146413	Mexico
27883	C27883T	0	0	0.146413	CostaRica
27897	A27897T	0	0.27027	0	Russia
27898	A27898C	0	0.27027	0	Russia
27899	A27899C	0	0.27027	0	Russia
27916	G27916T	0.209205	0.27027	0	Russia
27924	A27924G	0	0	0.146413	Belgium
27972	C27972T	0.41841	0.27027	0	Russia
27987	G27987T	0	0	0.146413	Australia
27991	T27991G	0	0	0.146413	Poland
27995	T27995C	0	0	0.146413	Namibia
27999	C27999T	0	0	0.146413	Belgium
28001	G28001T	0.209205	0	0.146413	USA
28006	C28006T	0	0	0.146413	Mexico
28024	A28024T	0	1.08108	0	Russia
28025	A28025T	0	0.540541	0	Russia
28042	G28042T	0	0	0.146413	Mozambique
28045	C28045T	0	0	0.146413	Ecuador
28054	C28054T	0	0.27027	0	Russia
28057	C28057T	0	0	0.146413	Montenegro
28079	G28079T	5.43933	1.08108	0.146413	Russia, SouthKorea
28087	C28087T	0	0	0.146413	Netherlands
28092	T28092C	0	0	0.146413	Nigeria
28109	G28109T	0	0.27027	0	Russia
28132	C28132T	0.209205	0	0
28136	T28136G	0	0.27027	0	Russia
28146	C28146T	0	0.27027	0	Russia
28153	C28153T	0.209205	0.27027	0.292826	Finland, Russia, Slovenia
28165	A28165G	0.209205	0	0
28167	G28167A	0.209205	0	0
28178	G28178T	0	0.27027	0.146413	Netherlands, Russia
28232	C28232T	0	0.27027	0	Russia
28237	G28237A	0	0	0.146413	CostaRica
28250	T28250G	0	0.27027	0	Russia
28251	T28251G	0	0.27027	0	Russia
28251	T28251C	0	0	0.146413	Mozambique
28253	C28253T	0	0.27027	0.146413	Luxembourg, Russia
28253	C28253G	0	0	0.146413	Mozambique
28254	A28254C	0	0.27027	0.146413	Luxembourg, Russia
28254	A28254T	0	0	0.146413	Mozambique
28268	A28268T	0.209205	0	0
28271	A28271T	89.749	100	96.3397	Algeria, AmericanSamoa, Andorra, AntiguaandBarbuda, Argentina, Aruba, Australia, Azerbaijan, Belgium, Belize, Bermuda, Bonaire, BosniaandHerzegovina, Botswana, Brazil, Brunei, Bulgaria, Cambodia, Cameroon, Canada, Chile, Colombia, CostaRica, Croatia, Curacao, CzechRepublic, Djibouti, DominicanRepublic, Ecuador, ElSalvador, England, Estonia, Eswatini, Finland, France, FrenchGuiana, Gambia, Georgia…
28285	T28285C	0	0	0.146413	Canada
28291	C28291T	0	0	0.146413	Croatia
28292	C28292A	0	0	0.146413	Guatemala
28295	A28295G	0	0	0.146413	ElSalvador
28311	C28311T	96.6527	100	95.022	Algeria, AmericanSamoa, Andorra, AntiguaandBarbuda, Argentina, Aruba, Australia, Azerbaijan, Belgium, Belize, Bermuda, Bonaire, BosniaandHerzegovina, Botswana, Brazil, Brunei, Bulgaria, Cambodia, Cameroon, Canada, Chile, Colombia, CostaRica, Croatia, Curacao, CzechRepublic, Djibouti, DominicanRepublic, Ecuador, ElSalvador, England, Estonia, Eswatini, Finland, France, FrenchGuiana, Gambia, Georgia…
28332	C28332T	0.209205	0.27027	0	Russia
28344	C28344T	0	0.27027	0	Russia
28363	A28363T	0	0.27027	1.02489	Estonia, Nepal, Russia, Slovenia
28367	C28367T	0	0	0.146413	Nepal
28370	A28370G	0	0	0.146413	Estonia
28373	G28373T	0	0	0.146413	Brunei
28374	G28374T	0.209205	0	0
28382	T28382C	0.209205	0	0.146413	USA
28416	A28416G	0	0	0.292826	Slovenia, Switzerland
28435	C28435T	0.209205	0.27027	0	Russia
28439	C28439T	0	0	0.292826	Australia, USA
28472	C28472T	0	0	1.1713	Belize, Brazil, Canada, CostaRica, Slovakia, USA
28473	C28473T	0	0.27027	0	Russia
28491	C28491T	0	0	0.146413	Oman
28492	A28492T	0	0	0.146413	Oman
28493	A28493G	0	0	0.146413	Oman
28495	T28495G	0	0	0.146413	Oman
28498	C28498T	0	0	0.146413	Rwanda
28531	C28531T	0	0.27027	0.439239	Botswana, Mexico, Russia
28576	G28576C	0	0	0.146413	Australia
28588	T28588C	0	0	0.146413	Guadeloupe
28603	C28603T	0.209205	0	0
28606	C28606T	0	0.27027	0.146413	Japan, Russia
28637	C28637T	0.209205	0	0
28638	C28638T	0	0	0.146413	Sweden
28642	T28642C	0	0	0.146413	USA
28657	C28657T	0	0	0.146413	USA
28665	T28665C	0	0	0.146413	Rwanda
28675	A28675G	0	0	0.146413	Canada
28677	C28677T	0.209205	0.27027	0.146413	Russia, USA
28693	T28693C	0.83682	0	0.146413	CostaRica
28695	C28695T	0	0	0.146413	USA
28705	T28705G	0	0	0.146413	Slovenia
28720	C28720T	0	0	0.146413	Canada
28723	T28723C	0	0	0.146413	Kenya
28724	C28724T	0	0	0.146413	Mexico
28729	T28729C	0	0	0.146413	SriLanka
28744	C28744T	0	0	0.146413	USA
28747	G28747T	0.209205	0	0
28754	C28754T	0	0	0.439239	Australia
28757	C28757T	0	0	0.146413	Switzerland
28765	A28765G	0	0.27027	0	Russia
28765	A28765C	0	0	0.146413	Peru
28770	C28770T	0.209205	0	0.146413	USA
28780	A28780G	0.41841	0	0
28781	G28781C	0	0	0.146413	USA
28792	A28792T	0	0.27027	0	Russia
28798	G28798T	0	0	0.146413	NewZealand
28803	G28803A	0	0	0.146413	Bonaire
28849	C28849T	0	0	0.146413	USA
28855	A28855T	0	0	0.146413	Macedonia
28868	C28868T	0	0	0.146413	USA
28877	A28877T	30.3347	46.4865	1.90337	Belgium, Croatia, DRC, Guadeloupe, Luxembourg, Russia, SouthKorea, Spain
28878	G28878C	30.3347	46.4865	1.75695	Belgium, Croatia, DRC, Luxembourg, Russia, SouthKorea, Spain
28881	G28881A	97.0711	100	99.2679	Algeria, AmericanSamoa, Andorra, AntiguaandBarbuda, Argentina, Aruba, Australia, Azerbaijan, Belgium, Belize, Bermuda, Bonaire, BosniaandHerzegovina, Botswana, Brazil, Brunei, Bulgaria, Cambodia, Cameroon, Canada, Chile, Colombia, Congo, CostaRica, Croatia, Curacao, CzechRepublic, DRC, Djibouti, DominicanRepublic, Ecuador, ElSalvador, England, Estonia, Eswatini, Finland, France, FrenchGuiana, Gam…
28881	G28881T	0	0	0.146413	NewZealand
28882	G28882A	97.0711	100	98.6823	Algeria, AmericanSamoa, Andorra, AntiguaandBarbuda, Argentina, Aruba, Australia, Azerbaijan, Belgium, Belize, Bermuda, Bonaire, BosniaandHerzegovina, Botswana, Brazil, Brunei, Bulgaria, Cambodia, Cameroon, Canada, Chile, Colombia, Congo, CostaRica, Croatia, Curacao, CzechRepublic, DRC, Djibouti, DominicanRepublic, Ecuador, ElSalvador, England, Estonia, Eswatini, Finland, France, FrenchGuiana, Gam…
28883	G28883C	97.0711	100	98.6823	Algeria, AmericanSamoa, Andorra, AntiguaandBarbuda, Argentina, Aruba, Australia, Azerbaijan, Belgium, Belize, Bermuda, Bonaire, BosniaandHerzegovina, Botswana, Brazil, Brunei, Bulgaria, Cambodia, Cameroon, Canada, Chile, Colombia, Congo, CostaRica, Croatia, Curacao, CzechRepublic, DRC, Djibouti, DominicanRepublic, Ecuador, ElSalvador, England, Estonia, Eswatini, Finland, France, FrenchGuiana, Gam…
28896	C28896T	0.209205	0	0
28899	G28899A	0	0	0.146413	Spain
28905	C28905T	0	0	0.146413	Switzerland
28915	C28915A	0	0.540541	0	Russia
28920	A28920C	0	0.27027	0	Russia
28921	T28921A	0	0	0.146413	Argentina
28925	G28925A	0	0	0.439239	Australia
28927	T28927C	0	0.27027	0	Russia
28936	G28936C	0	0.27027	0	Russia
28942	G28942A	0	0	0.292826	Paraguay, USA
28948	C28948T	0	0.27027	0.146413	Russia, USA
28949	A28949T	0	0.27027	0	Russia
28957	C28957T	0	0.540541	0	Russia
28981	T28981C	0	0.27027	0	Russia
29000	G29000T	0	0.27027	0.146413	Russia, Rwanda
29041	G29041A	0.209205	0	0
29067	C29067T	0	0.27027	0.146413	Argentina, Russia
29072	G29072T	0.209205	0	0.146413	Australia
29081	G29081T	0	0	0.146413	CostaRica
29088	A29088T	0	0	0.146413	Mexico
29095	C29095T	0.209205	0	0
29104	T29104C	0	0	0.146413	Brazil
29109	C29109T	0	0	0.146413	Australia
29137	C29137T	0	0	0.146413	Peru
29139	A29139T	0.209205	0	0
29152	A29152G	0	0	0.146413	Kenya
29160	C29160T	0	0	0.292826	Australia
29171	C29171T	0.209205	0	0
29173	T29173C	0	0	0.146413	Mexico
29200	C29200T	0.209205	0	0
29205	C29205G	0	0	0.146413	Saint-Martin
29215	C29215T	0	0	0.146413	CostaRica
29218	C29218T	0	0	0.146413	Eswatini
29237	A29237G	0	0	0.146413	Curacao
29247	C29247T	0.209205	0	0
29260	G29260T	0	0	0.146413	USA
29272	C29272T	0	0	0.146413	NorthernMarianaIslands
29301	A29301G	4.81172	5.13514	8.78477	Andorra, Argentina, Aruba, Australia, Bonaire, Cameroon, Congo, CostaRica, Curacao, ElSalvador, England, Guinea, India, Mexico, NewZealand, NorthernMarianaIslands, Norway, Paraguay, Peru, Portugal, Russia, TrinidadandTobago, USA, Zhejiang
29303	C29303T	0	0	0.146413	USA
29315	G29315C	0	0	0.439239	CostaRica
29317	T29317C	0.41841	0	0
29353	C29353T	0	0	0.146413	Australia
29366	C29366T	0	0	0.146413	Australia
29367	C29367T	0.209205	0	0
29368	A29368G	0	0.27027	0	Russia
29370	C29370T	0.41841	0.27027	0	Russia
29384	G29384A	0	0	0.146413	Mexico
29409	C29409T	0	0	0.146413	Switzerland
29421	C29421T	0.209205	0	0
29457	T29457C	0.209205	0	0
29491	A29491G	0.209205	0	0
29509	C29509T	0.209205	0	0.146413	CostaRica
29526	A29526T	0	0	0.146413	Switzerland
29541	C29541T	0	0	0.146413	Croatia
29545	C29545T	0	0	0.292826	Curacao, Mexico
29567	A29567G	0	0	0.146413	Ghana
29625	C29625T	0.41841	0	0
29627	C29627T	0	0	0.146413	Netherlands
29632	C29632T	0.41841	0.540541	2.92826	Azerbaijan, Canada, Curacao, England, Guatemala, Guinea, Kosovo, Latvia, Lithuania, Mexico, Portugal, Romania, Russia, Serbia, Singapore, USA
29635	C29635T	0	0	0.292826	Australia
29640	C29640T	0	0	0.146413	Australia
29642	C29642T	0	0	0.292826	Luxembourg, Poland
29666	C29666T	0	0	0.146413	Ireland
29690	G29690T	0	0	0.146413	Canada
29705	G29705T	0	0.27027	0	Russia
29708	C29708T	0	0.540541	0	Russia
29718	C29718T	0	0	0.146413	Mexico
29722	C29722A	0	0	0.146413	Paraguay
29732	C29732A	0.209205	0	0
29732	C29732T	0	0	0.292826	Canada, USA
29733	C29733A	0.209205	0	0
29733	C29733T	0	0	0.292826	SouthKorea, USA
29734	G29734T	0.209205	0	0
29734	G29734A	0.209205	0	0
29736	G29736T	0.41841	0	0.146413	Brazil
29739	C29739T	0.209205	0	0
29741	C29741G	0.209205	0	0
29741	C29741T	0.209205	0	0
29743	C29743G	0.209205	0	0
29743	C29743T	0	0	0.146413	Greece
29744	G29744A	0.41841	0.27027	0	Russia
29747	G29747T	0	0	0.146413	USA
29748	T29748C	1.25523	1.89189	0	Russia
29751	G29751A	0.209205	0	0
29751	G29751C	0.209205	0	0
29754	C29754T	0	0	0.146413	Iran
29755	G29755C	1.04603	0.540541	0.146413	Ireland, Russia
29756	A29756T	0.209205	0	0
29758	T29758C	0.209205	0	0
29759	G29759C	0.209205	0	0
29762	C29762T	0.209205	0	0
29764	G29764T	0.209205	0	0
29765	T29765G	0.209205	0	0
29769	C29769T	0.209205	0	0
29769	C29769G	0.209205	0	0
29771	A29771G	0.209205	0	0
29772	T29772C	0.41841	0	0
29773	G29773C	0.209205	0	0
29774	C29774T	0	0	0.146413	Greece
29778	G29778T	0	0	0.146413	Macedonia
29781	G29781T	0	0	0.146413	Aruba
29784	C29784T	0.41841	0	0
29792	A29792T	0	0	0.146413	USA
29807	T29807C	0	0.27027	0	Russia
29807	T29807A	0	0	0.146413	Peru
29851	T29851A	0.209205	0	0
29861	G29861A	0.209205	0	0
29862	G29862A	0.209205	0	0
29864	G29864A	0.209205	0	0
29867	T29867A	0.209205	0	0
29868	G29868A	0.209205	0	0
29870	C29870A	0.209205	0	0
29885	A29885T	0	0	0.146413	Cameroon
29900	A29900T	0	0	0.146413	Brazil

## Sheet: ba2_mutations
Supplementary Table 2. Full list of mutations identified in the study in different datasets
Position	Mutation	Freq_Russia_FMBA	Freq_Russia_GISAID	Freq_world_GISAID	Mutation_countries
44	C44T	42.5926	0	24.6575	India, Italy, Jordan, Moldova, Montenegro, Norway, Oman, Pakistan, Qatar, Singapore, SouthAfrica, USA
110	C110T	0	0	1.36986	SouthAfrica
151	C151A	0	0	1.36986	Lithuania
177	T177C	0	0	1.36986	USA
219	G219A	0	0	1.36986	USA
228	C228T	0	0	1.36986	SouthAfrica
241	C241T	77.7778	100	90.411	Australia, Austria, Bangladesh, Cambodia, Canada, Denmark, HongKong, India, Indonesia, Ireland, Italy, Jordan, Lithuania, Montenegro, Myanmar, NewZealand, Norway, Oman, Pakistan, Philippines, Qatar, Russia, Singapore, SouthAfrica, Spain, Sweden, Switzerland, Thailand, USA, Zambia
373	G373A	3.7037	0	0
593	C593T	9.25926	0	0
635	C635T	1.85185	0	0
670	T670G	100	100	100	Australia, Austria, Bangladesh, Cambodia, Canada, Denmark, Germany, HongKong, India, Indonesia, Ireland, Italy, Jordan, Lithuania, Moldova, Montenegro, Myanmar, NewZealand, Norway, Oman, Pakistan, Philippines, Qatar, Russia, Singapore, SouthAfrica, Spain, SriLanka, Sweden, Switzerland, Thailand, USA, Zambia
832	C832T	0	0	1.36986	Cambodia
872	G872A	1.85185	0	0
1077	C1077T	1.85185	0	0
1250	A1250G	1.85185	0	0
1303	T1303A	0	0	1.36986	Lithuania
1314	C1314T	0	0	1.36986	Austria
1585	A1585C	0	0	1.36986	Moldova
1652	A1652G	1.85185	0	0
1811	G1811T	0	0	1.36986	Philippines
1820	G1820A	0	0	1.36986	Norway
1912	C1912T	0	0	1.36986	Qatar
2288	G2288T	0	0	1.36986	Indonesia
2554	A2554G	0	0	1.36986	USA
2648	G2648C	0	0	1.36986	Norway
2790	C2790T	100	100	98.6301	Australia, Austria, Bangladesh, Cambodia, Canada, Denmark, Germany, HongKong, India, Indonesia, Ireland, Italy, Jordan, Lithuania, Montenegro, Myanmar, NewZealand, Norway, Oman, Pakistan, Philippines, Qatar, Russia, Singapore, SouthAfrica, Spain, SriLanka, Sweden, Switzerland, Thailand, USA, Zambia
2845	T2845C	0	0	1.36986	USA
3037	C3037T	100	100	100	Australia, Austria, Bangladesh, Cambodia, Canada, Denmark, Germany, HongKong, India, Indonesia, Ireland, Italy, Jordan, Lithuania, Moldova, Montenegro, Myanmar, NewZealand, Norway, Oman, Pakistan, Philippines, Qatar, Russia, Singapore, SouthAfrica, Spain, SriLanka, Sweden, Switzerland, Thailand, USA, Zambia
3429	C3429T	1.85185	0	0
3672	A3672G	0	0	1.36986	HongKong
3784	C3784T	0	0	1.36986	Sweden
3802	T3802C	0	0	1.36986	Zambia
3961	C3961T	0	0	1.36986	Pakistan
4184	G4184A	100	100	100	Australia, Austria, Bangladesh, Cambodia, Canada, Denmark, Germany, HongKong, India, Indonesia, Ireland, Italy, Jordan, Lithuania, Moldova, Montenegro, Myanmar, NewZealand, Norway, Oman, Pakistan, Philippines, Qatar, Russia, Singapore, SouthAfrica, Spain, SriLanka, Sweden, Switzerland, Thailand, USA, Zambia
4321	C4321T	100	100	100	Australia, Austria, Bangladesh, Cambodia, Canada, Denmark, Germany, HongKong, India, Indonesia, Ireland, Italy, Jordan, Lithuania, Moldova, Montenegro, Myanmar, NewZealand, Norway, Oman, Pakistan, Philippines, Qatar, Russia, Singapore, SouthAfrica, Spain, SriLanka, Sweden, Switzerland, Thailand, USA, Zambia
4527	G4527A	3.7037	0	0
4795	C4795T	1.85185	0	0
4893	C4893T	3.7037	0	4.10959	HongKong, Pakistan, Qatar
4921	C4921T	1.85185	0	0
4975	G4975A	3.7037	70.3704	0	Russia
5055	C5055T	0	0	1.36986	Qatar
5166	A5166C	1.85185	0	0
5176	A5176G	0	0	1.36986	Indonesia
5183	C5183T	0	0	1.36986	India
5544	C5544T	0	0	2.73973	Ireland, Sweden
5886	C5886T	0	0	1.36986	Denmark
6196	C6196T	5.55556	0	2.73973	NewZealand, Oman
6250	C6250T	0	0	1.36986	Sweden
6266	G6266A	1.85185	0	0
6271	G6271A	0	0	1.36986	Jordan
6310	C6310T	1.85185	0	0
6390	A6390C	3.7037	70.3704	0	Russia
6470	A6470G	0	0	1.36986	Denmark
6539	C6539T	1.85185	0	0
6701	C6701T	0	0	1.36986	Denmark
6706	C6706T	0	0	1.36986	SriLanka
7067	G7067A	1.85185	0	0
7138	T7138C	0	0	1.36986	Singapore
7165	C7165T	0	0	1.36986	Singapore
7279	C7279T	3.7037	0	0
7488	C7488T	0	0	1.36986	Qatar
7844	C7844T	0	0	1.36986	Sweden
7919	T7919C	1.85185	0	0
8755	A8755G	1.85185	0	0
8858	G8858A	1.85185	0	0
8991	C8991T	0	0	16.4384	Cambodia, Canada, HongKong, Jordan, Myanmar, Philippines, USA
9097	T9097C	0	0	1.36986	Germany
9166	C9166T	0	0	1.36986	Denmark
9344	C9344T	100	96.2963	97.2603	Australia, Austria, Bangladesh, Cambodia, Canada, Denmark, Germany, HongKong, India, Indonesia, Ireland, Italy, Jordan, Lithuania, Montenegro, Myanmar, NewZealand, Norway, Oman, Pakistan, Philippines, Qatar, Russia, Singapore, SouthAfrica, Spain, SriLanka, Sweden, Switzerland, Thailand, USA, Zambia
9424	A9424G	64.8148	96.2963	97.2603	Australia, Austria, Bangladesh, Cambodia, Denmark, Germany, HongKong, India, Indonesia, Ireland, Italy, Jordan, Lithuania, Moldova, Montenegro, Myanmar, NewZealand, Norway, Oman, Pakistan, Philippines, Qatar, Russia, Singapore, SouthAfrica, Spain, SriLanka, Sweden, Switzerland, Thailand, USA, Zambia
9442	C9442T	0	0	1.36986	Pakistan
9534	C9534T	62.963	100	97.2603	Australia, Austria, Bangladesh, Cambodia, Canada, Denmark, Germany, HongKong, India, Indonesia, Ireland, Italy, Jordan, Lithuania, Moldova, Montenegro, Myanmar, NewZealand, Norway, Oman, Pakistan, Philippines, Qatar, Russia, Singapore, SouthAfrica, Spain, SriLanka, Sweden, Switzerland, Thailand, USA, Zambia
9866	C9866T	98.1481	100	91.7808	Australia, Austria, Bangladesh, Cambodia, Canada, Denmark, Germany, HongKong, India, Indonesia, Ireland, Italy, Jordan, Lithuania, Moldova, Montenegro, Myanmar, NewZealand, Norway, Oman, Pakistan, Philippines, Qatar, Russia, Singapore, Spain, SriLanka, Sweden, Switzerland, Thailand, USA
9893	C9893T	0	0	1.36986	Qatar
9907	C9907T	0	0	1.36986	HongKong
10000	T10000C	3.7037	14.8148	0	Russia
10029	C10029T	100	100	100	Australia, Austria, Bangladesh, Cambodia, Canada, Denmark, Germany, HongKong, India, Indonesia, Ireland, Italy, Jordan, Lithuania, Moldova, Montenegro, Myanmar, NewZealand, Norway, Oman, Pakistan, Philippines, Qatar, Russia, Singapore, SouthAfrica, Spain, SriLanka, Sweden, Switzerland, Thailand, USA, Zambia
10030	C10030T	1.85185	0	0
10156	C10156T	0	0	1.36986	Cambodia
10198	C10198T	100	100	94.5205	Australia, Austria, Cambodia, Canada, Denmark, Germany, HongKong, India, Indonesia, Ireland, Italy, Jordan, Lithuania, Moldova, Montenegro, Myanmar, NewZealand, Norway, Oman, Pakistan, Philippines, Qatar, Russia, Singapore, SouthAfrica, Spain, SriLanka, Sweden, Switzerland, Thailand, USA, Zambia
10323	A10323G	0	0	1.36986	Indonesia
10447	G10447A	74.0741	100	100	Australia, Austria, Bangladesh, Cambodia, Canada, Denmark, Germany, HongKong, India, Indonesia, Ireland, Italy, Jordan, Lithuania, Moldova, Montenegro, Myanmar, NewZealand, Norway, Oman, Pakistan, Philippines, Qatar, Russia, Singapore, SouthAfrica, Spain, SriLanka, Sweden, Switzerland, Thailand, USA, Zambia
10449	C10449A	100	100	100	Australia, Austria, Bangladesh, Cambodia, Canada, Denmark, Germany, HongKong, India, Indonesia, Ireland, Italy, Jordan, Lithuania, Moldova, Montenegro, Myanmar, NewZealand, Norway, Oman, Pakistan, Philippines, Qatar, Russia, Singapore, SouthAfrica, Spain, SriLanka, Sweden, Switzerland, Thailand, USA, Zambia
10507	C10507T	1.85185	0	0
10696	T10696C	0	0	1.36986	HongKong
11029	G11029T	0	0	1.36986	Sweden
11083	G11083T	0	0	2.73973	India, Lithuania
11094	C11094T	0	0	1.36986	Denmark
11179	G11179A	0	11.1111	0	Russia
11249	C11249T	0	3.7037	0	Russia
11634	G11634T	1.85185	0	0
12412	C12412T	0	0	1.36986	Myanmar
12525	C12525T	0	0	1.36986	HongKong
12880	C12880T	100	100	100	Australia, Austria, Bangladesh, Cambodia, Canada, Denmark, Germany, HongKong, India, Indonesia, Ireland, Italy, Jordan, Lithuania, Moldova, Montenegro, Myanmar, NewZealand, Norway, Oman, Pakistan, Philippines, Qatar, Russia, Singapore, SouthAfrica, Spain, SriLanka, Sweden, Switzerland, Thailand, USA, Zambia
13176	C13176T	0	0	1.36986	Qatar
13339	T13339C	1.85185	0	0
13378	C13378T	0	0	1.36986	Austria
13403	G13403A	0	7.40741	0	Russia
13665	C13665T	1.85185	0	1.36986	Pakistan
13969	A13969T	1.85185	0	0
14408	C14408T	100	100	100	Australia, Austria, Bangladesh, Cambodia, Canada, Denmark, Germany, HongKong, India, Indonesia, Ireland, Italy, Jordan, Lithuania, Moldova, Montenegro, Myanmar, NewZealand, Norway, Oman, Pakistan, Philippines, Qatar, Russia, Singapore, SouthAfrica, Spain, SriLanka, Sweden, Switzerland, Thailand, USA, Zambia
14652	T14652C	3.7037	0	0
14960	A14960T	0	0	1.36986	Australia
15105	C15105A	0	0	1.36986	Denmark
15437	T15437C	0	0	1.36986	Norway
15540	C15540T	0	0	1.36986	Sweden
15714	C15714T	100	100	100	Australia, Austria, Bangladesh, Cambodia, Canada, Denmark, Germany, HongKong, India, Indonesia, Ireland, Italy, Jordan, Lithuania, Moldova, Montenegro, Myanmar, NewZealand, Norway, Oman, Pakistan, Philippines, Qatar, Russia, Singapore, SouthAfrica, Spain, SriLanka, Sweden, Switzerland, Thailand, USA, Zambia
16056	T16056C	0	0	1.36986	Australia
16131	A16131G	1.85185	0	0
16137	G16137A	1.85185	0	0
16289	C16289T	0	0	1.36986	SouthAfrica
16342	T16342C	1.85185	0	13.6986	Australia, Austria, Bangladesh, Cambodia, India, Indonesia, Italy, NewZealand, Thailand
16733	C16733T	0	0	1.36986	Ireland
16887	C16887T	0	0	1.36986	Singapore
16896	T16896C	0	0	1.36986	Indonesia
17079	G17079A	1.85185	0	0
17410	C17410T	100	100	100	Australia, Austria, Bangladesh, Cambodia, Canada, Denmark, Germany, HongKong, India, Indonesia, Ireland, Italy, Jordan, Lithuania, Moldova, Montenegro, Myanmar, NewZealand, Norway, Oman, Pakistan, Philippines, Qatar, Russia, Singapore, SouthAfrica, Spain, SriLanka, Sweden, Switzerland, Thailand, USA, Zambia
17574	T17574C	0	11.1111	0	Russia
17734	C17734T	9.25926	3.7037	0	Russia
18060	C18060T	0	0	1.36986	Philippines
18163	A18163G	77.7778	100	100	Australia, Austria, Bangladesh, Cambodia, Canada, Denmark, Germany, HongKong, India, Indonesia, Ireland, Italy, Jordan, Lithuania, Moldova, Montenegro, Myanmar, NewZealand, Norway, Oman, Pakistan, Philippines, Qatar, Russia, Singapore, SouthAfrica, Spain, SriLanka, Sweden, Switzerland, Thailand, USA, Zambia
19151	C19151T	0	0	1.36986	USA
19152	C19152T	0	0	1.36986	Sweden
19220	C19220T	1.85185	0	0
19688	C19688T	0	0	1.36986	Norway
19955	C19955T	100	100	98.6301	Australia, Austria, Bangladesh, Cambodia, Canada, Denmark, Germany, HongKong, India, Indonesia, Ireland, Italy, Jordan, Lithuania, Moldova, Montenegro, Myanmar, NewZealand, Norway, Oman, Pakistan, Philippines, Qatar, Russia, Singapore, SouthAfrica, Spain, SriLanka, Sweden, Switzerland, Thailand, USA, Zambia
19962	G19962A	0	0	1.36986	Denmark
19983	C19983T	0	0	1.36986	SouthAfrica
20055	A20055G	100	100	98.6301	Australia, Austria, Bangladesh, Cambodia, Canada, Denmark, Germany, HongKong, India, Indonesia, Ireland, Italy, Jordan, Lithuania, Moldova, Montenegro, Myanmar, NewZealand, Norway, Oman, Pakistan, Philippines, Qatar, Russia, Singapore, SouthAfrica, Spain, SriLanka, Sweden, Switzerland, Thailand, USA, Zambia
20178	C20178T	0	0	1.36986	Thailand
20396	A20396G	1.85185	0	0
20620	A20620G	1.85185	0	0
20762	C20762T	0	3.7037	0	Russia
21015	T21015C	1.85185	0	0
21145	C21145A	0	0	1.36986	SouthAfrica
21304	C21304A	0	0	1.36986	Austria
21305	G21305A	0	0	1.36986	Austria
21575	C21575T	0	0	1.36986	Sweden
21618	C21618T	100	100	97.2603	Australia, Austria, Bangladesh, Cambodia, Denmark, Germany, HongKong, India, Indonesia, Ireland, Italy, Jordan, Lithuania, Moldova, Montenegro, Myanmar, NewZealand, Norway, Oman, Pakistan, Philippines, Qatar, Russia, Singapore, SouthAfrica, Spain, SriLanka, Sweden, Switzerland, Thailand, USA, Zambia
21691	C21691T	0	0	1.36986	Sweden
21721	C21721T	0	0	1.36986	Denmark
21728	T21728C	0	0	1.36986	Norway
21786	G21786T	0	0	1.36986	Italy
21987	G21987A	31.4815	100	97.2603	Australia, Austria, Bangladesh, Cambodia, Canada, Denmark, Germany, HongKong, India, Indonesia, Ireland, Italy, Jordan, Lithuania, Moldova, Montenegro, Myanmar, NewZealand, Norway, Oman, Pakistan, Philippines, Qatar, Russia, Singapore, SouthAfrica, Spain, SriLanka, Sweden, Switzerland, Thailand, USA, Zambia
22008	A22008G	0	0	1.36986	SouthAfrica
22200	T22200G	0	100	97.2603	Australia, Austria, Bangladesh, Cambodia, Canada, Denmark, Germany, HongKong, India, Indonesia, Ireland, Italy, Jordan, Lithuania, Moldova, Montenegro, Myanmar, NewZealand, Norway, Oman, Philippines, Qatar, Russia, Singapore, SouthAfrica, Spain, SriLanka, Sweden, Switzerland, Thailand, USA, Zambia
22295	C22295T	0	0	1.36986	Oman
22414	C22414A	0	0	1.36986	SouthAfrica
22468	G22468T	0	0	1.36986	Singapore
22578	G22578A	96.2963	92.5926	95.8904	Australia, Austria, Bangladesh, Cambodia, Canada, Denmark, Germany, HongKong, India, Indonesia, Ireland, Italy, Jordan, Lithuania, Moldova, Montenegro, Myanmar, NewZealand, Norway, Oman, Pakistan, Philippines, Qatar, Russia, Singapore, SouthAfrica, Spain, SriLanka, Sweden, Switzerland, Thailand, USA, Zambia
22599	G22599A	0	7.40741	0	Russia
22624	C22624T	0	0	1.36986	Indonesia
22674	C22674T	96.2963	88.8889	95.8904	Australia, Austria, Bangladesh, Cambodia, Canada, Denmark, Germany, HongKong, India, Indonesia, Ireland, Italy, Jordan, Lithuania, Moldova, Montenegro, Myanmar, NewZealand, Norway, Oman, Pakistan, Philippines, Qatar, Russia, Singapore, SouthAfrica, Spain, SriLanka, Sweden, Switzerland, Thailand, USA, Zambia
22679	T22679C	96.2963	88.8889	95.8904	Australia, Austria, Bangladesh, Cambodia, Canada, Denmark, Germany, HongKong, India, Indonesia, Ireland, Italy, Jordan, Lithuania, Moldova, Montenegro, Myanmar, NewZealand, Norway, Oman, Pakistan, Philippines, Qatar, Russia, Singapore, SouthAfrica, Spain, SriLanka, Sweden, Switzerland, Thailand, USA, Zambia
22686	C22686T	98.1481	88.8889	94.5205	Australia, Austria, Bangladesh, Cambodia, Canada, Denmark, Germany, HongKong, India, Indonesia, Ireland, Italy, Jordan, Lithuania, Montenegro, Myanmar, NewZealand, Norway, Oman, Pakistan, Philippines, Qatar, Russia, Singapore, SouthAfrica, Spain, SriLanka, Sweden, Switzerland, Thailand, USA, Zambia
22687	C22687G	0	0	1.36986	Moldova
22688	A22688G	98.1481	81.4815	95.8904	Australia, Austria, Bangladesh, Cambodia, Canada, Denmark, Germany, HongKong, India, Indonesia, Ireland, Italy, Jordan, Lithuania, Montenegro, Myanmar, NewZealand, Norway, Oman, Pakistan, Philippines, Qatar, Russia, Singapore, SouthAfrica, Spain, SriLanka, Sweden, Switzerland, Thailand, USA, Zambia
22775	G22775A	94.4444	85.1852	95.8904	Australia, Austria, Bangladesh, Cambodia, Canada, Denmark, Germany, HongKong, India, Indonesia, Ireland, Italy, Jordan, Lithuania, Moldova, Montenegro, Myanmar, NewZealand, Norway, Oman, Pakistan, Philippines, Qatar, Russia, Singapore, SouthAfrica, Spain, SriLanka, Sweden, Switzerland, Thailand, USA, Zambia
22786	A22786C	31.4815	11.1111	91.7808	Australia, Austria, Bangladesh, Cambodia, Canada, Denmark, Germany, HongKong, India, Indonesia, Ireland, Italy, Jordan, Lithuania, Moldova, Montenegro, Myanmar, NewZealand, Norway, Oman, Philippines, Qatar, Russia, Singapore, SouthAfrica, Spain, SriLanka, Sweden, Thailand, USA, Zambia
22792	C22792T	7.40741	0	26.0274	Austria, Denmark, Germany, Ireland, Moldova, Montenegro, Norway, Sweden
22813	G22813T	100	11.1111	94.5205	Australia, Austria, Bangladesh, Cambodia, Canada, Denmark, Germany, HongKong, India, Indonesia, Ireland, Italy, Jordan, Lithuania, Moldova, Montenegro, Myanmar, NewZealand, Norway, Oman, Pakistan, Philippines, Qatar, Russia, Singapore, SouthAfrica, Spain, SriLanka, Sweden, Switzerland, Thailand, USA, Zambia
22882	T22882G	98.1481	11.1111	87.6712	Australia, Austria, Bangladesh, Cambodia, Canada, Denmark, Germany, HongKong, India, Indonesia, Ireland, Italy, Jordan, Lithuania, Moldova, Montenegro, NewZealand, Norway, Oman, Pakistan, Philippines, Qatar, Russia, Singapore, SouthAfrica, Spain, SriLanka, Sweden, Switzerland, Thailand, USA, Zambia
22992	G22992A	48.1481	100	89.0411	Australia, Austria, Bangladesh, Cambodia, Canada, Denmark, Germany, HongKong, India, Indonesia, Ireland, Italy, Jordan, Lithuania, Moldova, Montenegro, Myanmar, NewZealand, Norway, Oman, Philippines, Qatar, Russia, Singapore, SouthAfrica, Spain, SriLanka, Sweden, Switzerland, Thailand, USA, Zambia
22995	C22995A	42.5926	100	89.0411	Australia, Austria, Bangladesh, Cambodia, Canada, Denmark, Germany, HongKong, India, Indonesia, Ireland, Italy, Jordan, Lithuania, Moldova, Montenegro, Myanmar, NewZealand, Norway, Oman, Philippines, Qatar, Russia, Singapore, SouthAfrica, Spain, SriLanka, Sweden, Switzerland, Thailand, USA, Zambia
23013	A23013C	46.2963	100	89.0411	Australia, Austria, Bangladesh, Cambodia, Canada, Denmark, Germany, HongKong, India, Indonesia, Ireland, Italy, Jordan, Lithuania, Moldova, Montenegro, Myanmar, NewZealand, Norway, Oman, Philippines, Qatar, Russia, Singapore, SouthAfrica, Spain, SriLanka, Sweden, Switzerland, Thailand, USA, Zambia
23335	T23335C	0	3.7037	0	Russia
23403	A23403G	100	100	100	Australia, Austria, Bangladesh, Cambodia, Canada, Denmark, Germany, HongKong, India, Indonesia, Ireland, Italy, Jordan, Lithuania, Moldova, Montenegro, Myanmar, NewZealand, Norway, Oman, Pakistan, Philippines, Qatar, Russia, Singapore, SouthAfrica, Spain, SriLanka, Sweden, Switzerland, Thailand, USA, Zambia
23422	C23422T	0	0	1.36986	Sweden
23434	T23434C	1.85185	0	0
23525	C23525T	100	100	100	Australia, Austria, Bangladesh, Cambodia, Canada, Denmark, Germany, HongKong, India, Indonesia, Ireland, Italy, Jordan, Lithuania, Moldova, Montenegro, Myanmar, NewZealand, Norway, Oman, Pakistan, Philippines, Qatar, Russia, Singapore, SouthAfrica, Spain, SriLanka, Sweden, Switzerland, Thailand, USA, Zambia
23599	T23599G	100	100	100	Australia, Austria, Bangladesh, Cambodia, Canada, Denmark, Germany, HongKong, India, Indonesia, Ireland, Italy, Jordan, Lithuania, Moldova, Montenegro, Myanmar, NewZealand, Norway, Oman, Pakistan, Philippines, Qatar, Russia, Singapore, SouthAfrica, Spain, SriLanka, Sweden, Switzerland, Thailand, USA, Zambia
23604	C23604A	100	100	100	Australia, Austria, Bangladesh, Cambodia, Canada, Denmark, Germany, HongKong, India, Indonesia, Ireland, Italy, Jordan, Lithuania, Moldova, Montenegro, Myanmar, NewZealand, Norway, Oman, Pakistan, Philippines, Qatar, Russia, Singapore, SouthAfrica, Spain, SriLanka, Sweden, Switzerland, Thailand, USA, Zambia
23854	C23854A	100	22.2222	100	Australia, Austria, Bangladesh, Cambodia, Canada, Denmark, Germany, HongKong, India, Indonesia, Ireland, Italy, Jordan, Lithuania, Moldova, Montenegro, Myanmar, NewZealand, Norway, Oman, Pakistan, Philippines, Qatar, Russia, Singapore, SouthAfrica, Spain, SriLanka, Sweden, Switzerland, Thailand, USA, Zambia
23948	G23948T	98.1481	100	100	Australia, Austria, Bangladesh, Cambodia, Canada, Denmark, Germany, HongKong, India, Indonesia, Ireland, Italy, Jordan, Lithuania, Moldova, Montenegro, Myanmar, NewZealand, Norway, Oman, Pakistan, Philippines, Qatar, Russia, Singapore, SouthAfrica, Spain, SriLanka, Sweden, Switzerland, Thailand, USA, Zambia
23955	G23955A	1.85185	0	0
23989	A23989G	0	0	1.36986	Denmark
24023	C24023T	0	0	1.36986	Austria
24424	A24424T	87.037	100	100	Australia, Austria, Bangladesh, Cambodia, Canada, Denmark, Germany, HongKong, India, Indonesia, Ireland, Italy, Jordan, Lithuania, Moldova, Montenegro, Myanmar, NewZealand, Norway, Oman, Pakistan, Philippines, Qatar, Russia, Singapore, SouthAfrica, Spain, SriLanka, Sweden, Switzerland, Thailand, USA, Zambia
24469	T24469A	94.4444	100	98.6301	Australia, Austria, Bangladesh, Cambodia, Canada, Denmark, Germany, HongKong, India, Indonesia, Ireland, Italy, Jordan, Lithuania, Montenegro, Myanmar, NewZealand, Norway, Oman, Pakistan, Philippines, Qatar, Russia, Singapore, SouthAfrica, Spain, SriLanka, Sweden, Switzerland, Thailand, USA, Zambia
24865	C24865T	0	0	1.36986	Montenegro
25000	C25000T	100	100	98.6301	Australia, Austria, Bangladesh, Cambodia, Canada, Denmark, Germany, HongKong, India, Indonesia, Ireland, Italy, Jordan, Lithuania, Moldova, Montenegro, Myanmar, NewZealand, Norway, Oman, Pakistan, Philippines, Qatar, Russia, Singapore, SouthAfrica, Spain, SriLanka, Sweden, Switzerland, Thailand, USA, Zambia
25166	G25166C	0	0	1.36986	India
25224	T25224C	0	0	1.36986	HongKong
25241	A25241G	0	11.1111	0	Russia
25411	A25411C	0	0	1.36986	Qatar
25416	C25416T	35.1852	3.7037	2.73973	Lithuania, Russia, Singapore
25511	C25511T	0	3.7037	0	Russia
25548	T25548C	0	0	1.36986	India
25584	C25584T	72.2222	100	100	Australia, Austria, Bangladesh, Cambodia, Canada, Denmark, Germany, HongKong, India, Indonesia, Ireland, Italy, Jordan, Lithuania, Moldova, Montenegro, Myanmar, NewZealand, Norway, Oman, Pakistan, Philippines, Qatar, Russia, Singapore, SouthAfrica, Spain, SriLanka, Sweden, Switzerland, Thailand, USA, Zambia
25618	G25618A	1.85185	0	0
25624	C25624T	0	0	8.21918	Austria, Denmark, Ireland, Moldova, Sweden
25810	C25810T	0	0	17.8082	Cambodia, Canada, HongKong, Jordan, Myanmar, Philippines, USA
25978	G25978A	0	0	1.36986	Ireland
26060	C26060T	98.1481	100	100	Australia, Austria, Bangladesh, Cambodia, Canada, Denmark, Germany, HongKong, India, Indonesia, Ireland, Italy, Jordan, Lithuania, Moldova, Montenegro, Myanmar, NewZealand, Norway, Oman, Pakistan, Philippines, Qatar, Russia, Singapore, SouthAfrica, Spain, SriLanka, Sweden, Switzerland, Thailand, USA, Zambia
26076	T26076C	0	0	1.36986	SouthAfrica
26110	C26110T	0	3.7037	0	Russia
26150	C26150T	0	0	1.36986	NewZealand
26270	C26270T	100	100	100	Australia, Austria, Bangladesh, Cambodia, Canada, Denmark, Germany, HongKong, India, Indonesia, Ireland, Italy, Jordan, Lithuania, Moldova, Montenegro, Myanmar, NewZealand, Norway, Oman, Pakistan, Philippines, Qatar, Russia, Singapore, SouthAfrica, Spain, SriLanka, Sweden, Switzerland, Thailand, USA, Zambia
26408	C26408T	0	0	2.73973	India, Sweden
26529	G26529C	1.85185	0	0
26577	C26577G	74.0741	77.7778	97.2603	Australia, Austria, Bangladesh, Cambodia, Canada, Denmark, Germany, HongKong, India, Indonesia, Ireland, Italy, Jordan, Lithuania, Moldova, Montenegro, Myanmar, NewZealand, Norway, Oman, Pakistan, Philippines, Qatar, Russia, Singapore, SouthAfrica, Spain, SriLanka, Sweden, Switzerland, Thailand, USA, Zambia
26600	C26600T	1.85185	0	0
26625	C26625T	0	0	1.36986	Spain
26709	G26709A	98.1481	96.2963	98.6301	Australia, Austria, Bangladesh, Cambodia, Canada, Denmark, Germany, HongKong, India, Indonesia, Ireland, Italy, Jordan, Lithuania, Moldova, Montenegro, Myanmar, NewZealand, Norway, Oman, Pakistan, Philippines, Qatar, Russia, Singapore, SouthAfrica, Spain, SriLanka, Sweden, Switzerland, Thailand, USA, Zambia
26727	G26727T	0	0	1.36986	Austria
26767	T26767C	0	3.7037	0	Russia
26781	C26781A	0	0	1.36986	Denmark
26858	C26858T	53.7037	96.2963	98.6301	Australia, Austria, Bangladesh, Cambodia, Canada, Denmark, Germany, HongKong, India, Indonesia, Ireland, Jordan, Lithuania, Moldova, Montenegro, Myanmar, NewZealand, Norway, Oman, Pakistan, Philippines, Qatar, Russia, Singapore, SouthAfrica, Spain, SriLanka, Sweden, Switzerland, Thailand, USA, Zambia
26873	C26873T	0	3.7037	0	Russia
26876	T26876C	3.7037	0	0
27259	A27259C	100	100	100	Australia, Austria, Bangladesh, Cambodia, Canada, Denmark, Germany, HongKong, India, Indonesia, Ireland, Italy, Jordan, Lithuania, Moldova, Montenegro, Myanmar, NewZealand, Norway, Oman, Pakistan, Philippines, Qatar, Russia, Singapore, SouthAfrica, Spain, SriLanka, Sweden, Switzerland, Thailand, USA, Zambia
27358	G27358T	0	0	1.36986	Zambia
27382	G27382C	51.8519	100	100	Australia, Austria, Bangladesh, Cambodia, Canada, Denmark, Germany, HongKong, India, Indonesia, Ireland, Italy, Jordan, Lithuania, Moldova, Montenegro, Myanmar, NewZealand, Norway, Oman, Pakistan, Philippines, Qatar, Russia, Singapore, SouthAfrica, Spain, SriLanka, Sweden, Switzerland, Thailand, USA, Zambia
27383	A27383T	51.8519	100	100	Australia, Austria, Bangladesh, Cambodia, Canada, Denmark, Germany, HongKong, India, Indonesia, Ireland, Italy, Jordan, Lithuania, Moldova, Montenegro, Myanmar, NewZealand, Norway, Oman, Pakistan, Philippines, Qatar, Russia, Singapore, SouthAfrica, Spain, SriLanka, Sweden, Switzerland, Thailand, USA, Zambia
27384	T27384C	51.8519	100	100	Australia, Austria, Bangladesh, Cambodia, Canada, Denmark, Germany, HongKong, India, Indonesia, Ireland, Italy, Jordan, Lithuania, Moldova, Montenegro, Myanmar, NewZealand, Norway, Oman, Pakistan, Philippines, Qatar, Russia, Singapore, SouthAfrica, Spain, SriLanka, Sweden, Switzerland, Thailand, USA, Zambia
27544	G27544T	0	0	1.36986	Indonesia
27589	G27589T	0	0	1.36986	Indonesia
27617	A27617T	0	0	1.36986	Zambia
27673	C27673T	0	0	1.36986	Jordan
27684	C27684T	0	0	2.73973	NewZealand
27802	T27802G	1.85185	0	0
27807	C27807T	100	100	98.6301	Australia, Austria, Bangladesh, Cambodia, Canada, Denmark, Germany, HongKong, India, Indonesia, Ireland, Italy, Jordan, Lithuania, Moldova, Montenegro, Myanmar, NewZealand, Norway, Oman, Pakistan, Philippines, Qatar, Russia, Singapore, SouthAfrica, Spain, SriLanka, Sweden, Switzerland, Thailand, USA, Zambia
27847	C27847A	0	0	1.36986	Indonesia
27884	C27884T	0	3.7037	0	Russia
27925	C27925A	0	0	1.36986	Montenegro
27928	C27928T	0	0	1.36986	Denmark
27945	C27945T	0	0	1.36986	Denmark
28271	A28271T	83.3333	100	98.6301	Australia, Austria, Bangladesh, Cambodia, Canada, Denmark, Germany, HongKong, India, Indonesia, Ireland, Italy, Jordan, Lithuania, Moldova, Montenegro, Myanmar, NewZealand, Norway, Oman, Pakistan, Philippines, Qatar, Russia, Singapore, SouthAfrica, Spain, SriLanka, Sweden, Switzerland, Thailand, USA, Zambia
28286	G28286A	0	0	1.36986	SouthAfrica
28311	C28311T	96.2963	100	98.6301	Australia, Austria, Bangladesh, Cambodia, Canada, Denmark, Germany, HongKong, India, Indonesia, Ireland, Italy, Jordan, Lithuania, Moldova, Montenegro, Myanmar, NewZealand, Norway, Oman, Pakistan, Philippines, Qatar, Russia, Singapore, SouthAfrica, Spain, SriLanka, Sweden, Switzerland, Thailand, USA, Zambia
28384	A28384G	0	0	1.36986	Denmark
28409	C28409T	0	0	1.36986	Ireland
28664	A28664T	1.85185	0	0
28877	A28877T	0	0	1.36986	Denmark
28878	G28878C	0	0	1.36986	Denmark
28881	G28881A	100	100	98.6301	Australia, Austria, Bangladesh, Cambodia, Canada, Denmark, Germany, HongKong, India, Indonesia, Ireland, Italy, Jordan, Lithuania, Moldova, Montenegro, Myanmar, NewZealand, Norway, Oman, Pakistan, Philippines, Qatar, Russia, Singapore, SouthAfrica, Spain, SriLanka, Sweden, Switzerland, Thailand, USA, Zambia
28882	G28882A	100	100	98.6301	Australia, Austria, Bangladesh, Cambodia, Canada, Denmark, Germany, HongKong, India, Indonesia, Ireland, Italy, Jordan, Lithuania, Moldova, Montenegro, Myanmar, NewZealand, Norway, Oman, Pakistan, Philippines, Qatar, Russia, Singapore, SouthAfrica, Spain, SriLanka, Sweden, Switzerland, Thailand, USA, Zambia
28883	G28883C	100	100	98.6301	Australia, Austria, Bangladesh, Cambodia, Canada, Denmark, Germany, HongKong, India, Indonesia, Ireland, Italy, Jordan, Lithuania, Moldova, Montenegro, Myanmar, NewZealand, Norway, Oman, Pakistan, Philippines, Qatar, Russia, Singapore, SouthAfrica, Spain, SriLanka, Sweden, Switzerland, Thailand, USA, Zambia
28957	C28957T	0	0	1.36986	Moldova
28960	G28960A	0	0	1.36986	Denmark
29321	G29321A	0	0	1.36986	NewZealand
29370	C29370T	0	0	1.36986	Austria
29371	A29371G	0	14.8148	0	Russia
29412	A29412T	0	0	1.36986	Pakistan
29420	C29420A	0	0	1.36986	Austria
29510	A29510C	94.4444	100	100	Australia, Austria, Bangladesh, Cambodia, Canada, Denmark, Germany, HongKong, India, Indonesia, Ireland, Italy, Jordan, Lithuania, Moldova, Montenegro, Myanmar, NewZealand, Norway, Oman, Pakistan, Philippines, Qatar, Russia, Singapore, SouthAfrica, Spain, SriLanka, Sweden, Switzerland, Thailand, USA, Zambia
29659	C29659T	0	0	1.36986	Singapore
29686	C29686T	0	0	1.36986	Singapore
29760	T29760A	5.55556	0	8.21918	Canada, Jordan, Moldova, Montenegro, Pakistan, SouthAfrica
29764	G29764A	5.55556	0	6.84932	Jordan, Moldova, Montenegro, Pakistan, SouthAfrica
29770	A29770T	5.55556	0	6.84932	Jordan, Moldova, Montenegro, Pakistan, SouthAfrica
29772	T29772G	5.55556	0	6.84932	Jordan, Moldova, Montenegro, Pakistan, SouthAfrica
29774	C29774G	0	0	2.73973	Jordan, Montenegro
29775	T29775A	0	0	2.73973	Jordan, Montenegro
29776	A29776G	0	0	2.73973	Jordan, Montenegro
29777	G29777A	0	0	2.73973	Jordan, Montenegro
29778	G29778A	0	0	1.36986	Moldova
29779	G29779A	5.55556	0	2.73973	Pakistan, SouthAfrica
29779	G29779C	0	0	2.73973	Jordan, Montenegro
29780	A29780T	0	0	2.73973	Jordan, Montenegro
29782	A29782C	0	0	1.36986	Moldova
29783	G29783T	0	0	1.36986	Moldova
29784	C29784G	0	0	1.36986	Moldova
29792	A29792T	0	0	1.36986	SouthAfrica
29793	T29793G	0	0	1.36986	SouthAfrica
29794	G29794T	0	0	1.36986	SouthAfrica
29796	A29796T	0	0	1.36986	SouthAfrica
29798	G29798A	0	0	1.36986	SouthAfrica
29802	C29802T	0	0	1.36986	SouthAfrica
29803	C29803A	0	0	1.36986	SouthAfrica
29804	T29804A	0	0	1.36986	SouthAfrica
29805	A29805T	0	0	1.36986	SouthAfrica
29806	A29806T	0	0	1.36986	SouthAfrica
29809	T29809A	0	0	1.36986	SouthAfrica
29813	A29813G	0	0	1.36986	SouthAfrica
29814	A29814T	0	0	1.36986	SouthAfrica
29815	A29815G	0	0	1.36986	SouthAfrica
29816	T29816C	0	0	1.36986	SouthAfrica
29819	A29819T	0	0	1.36986	SouthAfrica
