# Supplementary material for: Genomic Variability of SARS-CoV-2 Omicron Variant Circulating in the Russian Federation during Early December 2021 and Late January 2022
Source: Pathogens. 2022 Dec 2;11(12):1461. doi: 10.3390/pathogens11121461 (PMC9786029; doi:10.3390/pathogens11121461)
Supplement: Supplementary file 1 [file pathogens-11-01461-s001.zip › TableS4.xlsx]

## Sheet: haplotypes_ba1
Supplementary Table S4. SARS-CoV-2 Omicron haplotypes variability in the Russian and Global datasets
haplotype	frequency russia	frequency world
M:Q19E,S:G446S,S:K417N,S:N440K,S:N764K,S:R346K	11.03	0.15
M:Q19E,S:E484A,S:R346K,S:S477N,S:T478K,S:Y145D	10.09	0.29
S:E484A,S:R346K,S:S477N,S:T478K,S:Y145D	7.75	0.15
S:G446S,S:K417N,S:N440K,S:N764K,S:R346K	6.46	0.15
S:G446S,S:K417N,S:N440K,S:N764K	3.99	0
M:Q19E,S:E484A,S:G446S,S:K417N,S:N440K,S:N764K,S:R346K,S:S477N,S:T478K,S:Y145D	3.76	32.36
M:Q19E,S:E484A,S:G446S,S:K417N,S:N440K,S:N764K,S:R346K,S:S477N,S:T478K	3.52	1.17
M:Q19E,S:G446S,S:K417N,S:N440K,S:N764K	2.93	1.02
M:Q19E,S:G446S,S:K417N,S:N440K,S:N764K,S:R346K,S:Y145D	2.82	0.59
M:Q19E,S:E484A,S:N764K,S:R346K,S:S477N,S:T478K,S:Y145D	2.82	2.05
M:Q19E,S:E484A,S:S477N,S:T478K,S:Y145D	2.7	1.02
M:Q19E,S:E484A,S:G446S,S:K417N,S:N440K,S:N764K,S:S477N,S:T478K	1.88	1.9
S:E484A,S:G446S,S:K417N,S:N440K,S:N764K,S:R346K,S:S477N,S:T478K	1.88	0
M:I82T,S:E484A,S:R346K,S:S477N,S:T478K,S:Y145D	1.76	0
S:E484A,S:R346K,S:S477N,S:T478K	1.76	0
M:Q19E,S:E484A,S:G446S,S:K417N,S:N440K,S:R346K,S:S477N,S:T478K,S:Y145D	1.53	0
S:G446S,S:K417N,S:N440K	1.29	0
S:E484A,S:G446S,S:K417N,S:N440K,S:N764K,S:S477N,S:T478K	1.17	0
M:Q19E,ORF1a:V1887I,S:E484A,S:F643L,S:S477N,S:T478K,S:Y145D	1.17	0
S:G446S,S:K417N,S:N440K,S:N764K,S:R346K,S:Y145D	1.06	0
S:E484A,S:N764K,S:R346K,S:S477N,S:T478K,S:Y145D	1.06	0
S:E484A,S:S477N,S:T478K,S:Y145D	1.06	0
M:I82T,M:Q19E,S:E484A,S:R346K,S:S477N,S:T478K,S:Y145D	0.94	0
M:Q19E,ORF1a:V1887I,S:A701V,S:E484A,S:F643L,S:G446S,S:K417N,S:N440K,S:N764K,S:S477N,S:T478K	0.82	0
M:Q19E,S:E484A,S:R346K,S:S477N,S:T478K	0.82	0
M:Q19E,ORF1a:Q1227D,S:E484A,S:R346K,S:S477N,S:T478K,S:Y145D	0.7	0
M:Q19E,S:E484A,S:G446S,S:K417N,S:N440K,S:N764K,S:S477N,S:T478K,S:Y145D	0.7	19.03
M:Q19E,ORF1a:Q1227D,S:G446S,S:K417N,S:N440K,S:N764K,S:R346K	0.7	0
M:Q19E,ORF1a:V1887I,S:G446S,S:K417N,S:N440K,S:N764K	0.7	0
ORF1a:V1887I,S:A701V,S:F643L,S:G446S,S:K417N,S:N440K,S:N764K	0.7	0
M:Q19E,ORF1a:Q1227D,S:E484A,S:G446S,S:K417N,S:N440K,S:N764K,S:R346K,S:S477N,S:T478K	0.7	0
M:Q19E,N:D343G,ORF1a:V3690L,ORF3a:L106F,S:E484A,S:G446S,S:K417N,S:N440K,S:N764K,S:S477N,S:T478K	0.59	0
M:Q19E,ORF1a:V1887I,S:A701V,S:G446S,S:K417N,S:N440K,S:N764K	0.59	0
M:Q19E,S:G446S,S:K417N,S:N440K,S:N764K,S:Y145D	0.59	0.29
ORF1a:Q1227D,S:G446S,S:K417N,S:N440K,S:N764K,S:R346K	0.59	0
M:Q19E,ORF1a:Q1227D,S:E484A,S:N764K,S:R346K,S:S477N,S:T478K,S:Y145D	0.47	0
S:E484A,S:S477N,S:T478K	0.47	0
ORF3a:L106F,S:G446S,S:K417N,S:N440K,S:N764K	0.47	0
ORF1a:V1887I,S:A701V,S:E484A,S:G446S,S:K417N,S:N440K,S:N764K,S:S477N,S:T478K,S:Y145D	0.47	0
M:Q19E,N:D343G,ORF3a:L106F,S:G446S,S:K417N,S:N440K,S:N764K	0.47	0
M:Q19E,ORF1a:V1887I,S:A701V,S:F643L,S:G446S,S:K417N,S:N440K,S:N764K	0.47	0.15
M:Q19E,ORF1a:Q1227D,S:G446S,S:K417N,S:N440K,S:N764K,S:R346K,S:Y145D	0.47	0
M:Q19E,N:D343G,ORF1a:V3690L,ORF3a:L106F,S:E484A,S:S477N,S:T478K,S:Y145D	0.47	0
M:Q19E,N:D343G,ORF1a:V3690L,ORF3a:L106F,S:E484A,S:N764K,S:S477N,S:T478K,S:Y145D	0.47	0
M:Q19E,N:D343G,ORF3a:L106F,S:E484A,S:S477N,S:T478K,S:Y145D	0.47	0.29
S:E484A,S:G446S,S:K417N,S:N440K,S:N764K,S:S477N,S:T478K,S:Y145D	0.35	1.46
M:Q19E	0.35	0.59
M:Q19E,ORF3a:L106F,S:E484A,S:S477N,S:T478K,S:Y145D	0.35	0
ORF1a:V3690L,ORF3a:L106F,S:G446S,S:K417N,S:N440K,S:N764K	0.35	0
ORF1a:V1887I,S:E484A,S:F643L,S:S477N,S:T478K,S:Y145D	0.35	0
M:Q19E,ORF1a:V3690L,ORF3a:L106F,S:G446S,S:K417N,S:N440K,S:N764K	0.35	0
M:Q19E,N:D343G,ORF3a:L106F,S:E484A,S:G446S,S:K417N,S:N440K,S:N764K,S:S477N,S:T478K	0.35	0
M:Q19E,ORF1a:V1887I,S:A701V,S:E484A,S:F643L,S:N764K,S:S477N,S:T478K,S:Y145D	0.35	0
	0.23	0.15
S:G446S,S:K417N,S:N440K,S:R346K	0.23	0
S:E484A,S:G446S,S:K417N,S:N440K,S:N764K,S:R346K	0.23	0
S:E484A,S:G446S,S:K417N,S:N440K,S:N764K,S:R346K,S:S477N,S:T478K,S:Y145D	0.23	0.73
M:Q19E,S:E484A,S:G446S,S:K417N,S:N440K,S:N764K,S:R346K,S:T478K,S:Y145D	0.23	0
N:D343G,ORF3a:L106F,S:G446S,S:K417N,S:N440K,S:N764K	0.23	0
M:Q19E,S:E484A,S:N764K,S:S477N,S:T478K,S:Y145D	0.23	0.88
S:G446S,S:K417N,S:N440K,S:N764K,S:Y145D	0.23	0
M:Q19E,N:D343G,ORF1a:V3690L,ORF3a:L106F,S:E484A,S:G446S,S:K417N,S:N440K,S:N764K,S:S477N,S:T478K,S:Y145D	0.23	0
M:Q19E,ORF1a:Q1227D,S:E484A,S:G446S,S:K417N,S:N440K,S:N764K,S:R346K,S:S477N,S:T478K,S:Y145D	0.23	0
ORF1a:Q1227D,S:G446S,S:K417N,S:N440K,S:N764K	0.23	0
M:I82T,M:Q19E,S:E484A,S:S477N,S:T478K,S:Y145D	0.23	0
M:Q19E,S:E484A,S:G446S,S:K417N,S:N440K,S:N764K	0.23	0
M:Q19E,ORF1a:V1887I,S:F643L,S:G446S,S:K417N,S:N440K,S:N764K	0.23	0
M:Q19E,ORF1a:V1887I,S:E484A,S:S477N,S:T478K,S:Y145D	0.23	0
M:Q19E,N:D343G,ORF1a:V3690L,ORF3a:L106F,S:G446S,S:K417N,S:N440K,S:N764K	0.23	0
ORF1a:V1887I,S:A701V,S:G446S,S:K417N,S:N440K,S:N764K	0.23	0
ORF1a:V1887I,S:E484A,S:S477N,S:T478K,S:Y145D	0.23	0
M:Q19E,ORF1a:V1887I,S:A701V,S:E484A,S:F643L,S:S477N,S:T478K,S:Y145D	0.23	0
ORF1a:Q1227D,S:E484A,S:R346K,S:S477N,S:T478K,S:Y145D	0.23	0
M:Q19E,ORF1a:V1887I,S:A701V,S:E484A,S:F643L,S:G446S,S:K417N,S:N440K,S:N764K,S:S477N,S:T478K,S:Y145D	0.23	0.88
N:D343G,ORF3a:L106F,S:E484A,S:S477N,S:T478K,S:Y145D	0.23	0
S:E484A,S:G446S,S:K417N,S:N440K,S:N764K,S:R346K,S:Y145D	0.12	0
M:I82T,M:Q19E,N:D343G,ORF3a:L106F,S:E484A,S:S477N,S:T478K,S:Y145D	0.12	0
M:Q19E,S:E484A,S:G446S,S:K417N,S:N440K,S:N764K,S:S477N	0.12	0
M:Q19E,S:G446S,S:K417N,S:N440K,S:N764K,S:T478K	0.12	0
M:I82T,S:E484A,S:S477N,S:T478K,S:Y145D	0.12	0
M:Q19E,ORF1a:Q1227D,S:E484A,S:G446S,S:K417N,S:N440K,S:R346K,S:S477N,S:T478K,S:Y145D	0.12	0
ORF1a:Q1227D,S:E484A,S:G446S,S:K417N,S:N440K,S:N764K,S:S477N,S:T478K	0.12	0
S:E484A,S:G446S,S:K417N,S:N440K,S:S477N,S:T478K	0.12	0
M:I82T,S:E484A,S:G446S,S:K417N,S:N440K,S:R346K,S:S477N,S:T478K,S:Y145D	0.12	0
M:Q19E,S:G446S,S:K417N,S:N440K,S:N764K,S:R346K,S:T478K	0.12	0
N:D343G,ORF3a:L106F,S:E484A,S:G446S,S:S477N,S:T478K,S:Y145D	0.12	0
M:I82T,N:D343G,ORF3a:L106F,S:E484A,S:S477N,S:T478K,S:Y145D	0.12	0
ORF1a:V1887I,S:A701V,S:G446S,S:K417N,S:N440K	0.12	0
M:Q19E,N:D343G,ORF3a:L106F,S:E484A,S:G446S,S:K417N,S:N440K,S:N764K,S:S477N,S:T478K,S:Y145D	0.12	6
M:I82T,ORF1a:Q1227D,S:E484A,S:R346K,S:S477N,S:T478K,S:Y145D	0.12	0
M:Q19E,S:K417N,S:N764K,S:R346K,S:T478K	0.12	0
S:E484A,S:N764K,S:S477N,S:T478K,S:Y145D	0.12	0.15
S:E484A,S:G446S,S:K417N,S:N440K,S:N764K	0.12	0
M:Q19E,S:E484A,S:G446S,S:K417N,S:N440K,S:N764K,S:R346K	0.12	0
S:K417N,S:N764K	0.12	0
N:D343G,ORF1a:V3690L,ORF3a:L106F,S:G446S,S:K417N,S:N440K,S:N764K	0.12	0
N:D343G,ORF1a:V3690L,ORF3a:L106F,S:G446S,S:K417N,S:N440K,S:N764K,S:Y145D	0.12	0
ORF1a:V1887I,S:G446S,S:K417N,S:N440K	0.12	0
N:D343G,ORF3a:L106F,S:E484A,S:S477N,S:T478K	0.12	0
ORF1a:V3690L,ORF3a:L106F,S:E484A,S:G446S,S:K417N,S:N440K,S:N764K,S:S477N,S:T478K	0.12	0
M:Q19E,ORF3a:L106F,S:E484A,S:R346K,S:S477N,S:T478K,S:Y145D	0.12	0
S:K417N,S:N764K,S:R346K	0.12	0
M:Q19E,N:D343G,ORF1a:V3690L,ORF3a:L106F,S:G446S,S:K417N,S:N440K,S:N764K,S:T478K	0.12	0
M:Q19E,S:E484A,S:G446S,S:K417N,S:N440K,S:N764K,S:R346K,S:Y145D	0.12	0
M:Q19E,S:K417N,S:N764K,S:T478K	0.12	0
M:Q19E,S:G446S,S:K417N,S:N440K,S:N764K,S:T478K,S:Y145D	0.12	0
M:Q19E,N:D343G,ORF1a:V3690L,ORF3a:L106F,S:G446S,S:K417N,S:N440K	0.12	0
ORF1a:V1887I,S:E484A,S:S477N,S:T478K	0.12	0
ORF1a:V1887I,S:E484A,S:G446S,S:K417N,S:N440K,S:S477N,S:T478K	0.12	0
ORF1a:Q1227D,S:E484A,S:G446S,S:K417N,S:N440K,S:N764K,S:R346K,S:S477N,S:T478K	0.12	0
M:Q19E,S:E484A,S:G446S,S:K417N,S:N440K,S:N764K,S:R346K,S:S477N	0.12	0
N:D343G,ORF1a:V3690L,ORF3a:L106F,S:E484A,S:G446S,S:N440K,S:N764K,S:S477N,S:T478K	0.12	0
ORF1a:Q1227D,S:G446S,S:K417N,S:N440K,S:N764K,S:R346K,S:Y145D	0.12	0
ORF1a:V1887I,S:F643L,S:G446S,S:K417N,S:N440K	0.12	0
M:Q19E,ORF1a:Q1227D,S:G446S,S:K417N,S:N440K,S:N764K,S:Y145D	0.12	0
M:Q19E,ORF1a:V1887I,S:A701V,S:E484A,S:G446S,S:K417N,S:N440K,S:N764K,S:S477N,S:T478K,S:Y145D	0	1.9
M:Q19E,ORF1a:V1887I,S:A701V,S:E484A,S:N764K,S:S477N,S:T478K,S:Y145D	0	0.15
M:Q19E,N:D343G,ORF3a:L106F,S:E484A,S:K417N,S:N764K,S:S477N,S:T478K,S:Y145D	0	0.15
M:Q19E,ORF1a:V1887I,S:E484A,S:G446S,S:K417N,S:N440K,S:N764K,S:S477N,S:T478K,S:Y145D	0	5.86
S:E484A,S:G446S,S:N440K,S:N764K,S:S477N,S:T478K,S:Y145D	0	0.15
M:Q19E,S:R346K,S:Y145D	0	0.15
M:Q19E,ORF1a:V1887I,S:E484A,S:G446S,S:N440K,S:N764K,S:S477N,S:T478K,S:Y145D	0	0.44
M:Q19E,N:D343G,ORF3a:L106F,S:K417N,S:N764K,S:Y145D	0	0.15
M:Q19E,N:D343G,ORF3a:L106F,S:E484A,S:G446S,S:K417N,S:N764K,S:S477N,S:T478K,S:Y145D	0	0.15
M:Q19E,N:D343G,ORF3a:L106F,S:G446S,S:N764K,S:S477N,S:Y145D	0	0.15
M:Q19E,N:D343G,ORF3a:L106F,S:Y145D	0	0.15
M:Q19E,ORF1a:V1887I,S:A701V,S:E484A,S:G446S,S:N440K,S:N764K,S:S477N,S:T478K,S:Y145D	0	0.15
M:Q19E,S:K417N,S:N764K,S:R346K,S:S477N,S:T478K,S:Y145D	0	0.29
ORF1a:V1887I,S:A701V,S:E484A,S:G446S,S:K417N,S:N764K,S:S477N,S:T478K,S:Y145D	0	0.15
S:E484A,S:G446S,S:K417N,S:N764K,S:R346K,S:S477N,S:T478K,S:Y145D	0	0.15
M:Q19E,ORF1a:V1887I,S:N764K,S:Y145D	0	0.44
M:Q19E,S:E484A,S:K417N,S:N764K,S:R346K,S:S477N,S:T478K,S:Y145D	0	0.15
M:Q19E,S:E484A,S:G446S,S:N764K,S:R346K,S:S477N,S:T478K,S:Y145D	0	0.15
M:Q19E,S:K417N,S:N764K,S:Y145D	0	0.59
M:Q19E,N:D343G,ORF3a:L106F,S:K417N,S:N440K,S:N764K	0	0.15
M:Q19E,ORF1a:V1887I,S:A701V,S:E484A,S:G446S,S:K417N,S:N440K,S:N764K,S:S477N,S:T478K	0	0.15
M:Q19E,S:E484A,S:N764K,S:R346K,S:Y145D	0	0.44
M:Q19E,ORF1a:V1887I,S:E484A,S:K417N,S:N764K,S:S477N,S:T478K,S:Y145D	0	0.15
M:Q19E,S:E484A,S:G446S,S:K417N,S:N764K,S:S477N,S:T478K	0	0.15
M:Q19E,S:E484A,S:G446S,S:N440K,S:N764K,S:R346K,S:S477N,S:T478K	0	0.29
M:Q19E,S:E484A,S:G446S,S:N440K,S:S477N,S:T478K,S:Y145D	0	0.15
M:Q19E,N:D343G,ORF3a:L106F,S:G446S,S:K417N,S:N440K,S:N764K,S:Y145D	0	0.15
ORF1a:V1887I,S:E484A,S:G446S,S:K417N,S:N440K,S:N764K,S:S477N,S:T478K,S:Y145D	0	0.15
M:Q19E,S:E484A,S:G446S,S:K417N,S:N764K,S:S477N,S:T478K,S:Y145D	0	1.02
M:Q19E,S:E484A,S:G446S,S:K417N,S:N764K,S:R346K,S:S477N,S:T478K,S:Y145D	0	0.59
ORF1a:V1887I,S:A701V,S:E484A,S:F643L,S:N764K,S:S477N,S:T478K,S:Y145D	0	0.15
N:D343G,ORF3a:L106F,S:N764K,S:Y145D	0	0.15
M:Q19E,S:G446S,S:N440K,S:N764K,S:R346K,S:S477N,S:T478K,S:Y145D	0	0.15
M:Q19E,S:G446S,S:K417N,S:N764K,S:R346K,S:Y145D	0	0.15
M:Q19E,N:D343G,ORF3a:L106F,S:N764K,S:Y145D	0	0.29
M:Q19E,S:G446S,S:K417N,S:N764K,S:R346K,S:S477N,S:T478K,S:Y145D	0	0.29
M:Q19E,S:E484A,S:G446S,S:N440K,S:N764K,S:S477N,S:T478K,S:Y145D	0	1.17
M:Q19E,S:E484A,S:N764K,S:R346K,S:T478K,S:Y145D	0	0.15
M:Q19E,S:G446S,S:N440K,S:N764K,S:Y145D	0	0.15
N:D343G,ORF3a:L106F,S:E484A,S:G446S,S:K417N,S:N440K,S:N764K,S:S477N,S:T478K,S:Y145D	0	0.44
M:Q19E,S:K417N,S:N764K,S:R346K,S:Y145D	0	1.17
M:Q19E,S:N764K,S:Y145D	0	0.88
M:Q19E,S:E484A,S:G446S,S:N440K,S:N764K,S:R346K,S:S477N,S:T478K,S:Y145D	0	2.78
M:Q19E,N:D343G,ORF3a:L106F,S:E484A,S:N764K,S:S477N,S:T478K,S:Y145D	0	0.15
M:Q19E,S:E484A,S:K417N,S:N764K,S:S477N,S:T478K,S:Y145D	0	0.29
M:Q19E,S:G446S,S:K417N,S:N764K,S:R346K,S:S477N,S:Y145D	0	0.15
M:Q19E,S:Y145D	0	0.73
M:Q19E,ORF1a:V1887I,S:E484A,S:N764K,S:S477N,S:T478K,S:Y145D	0	0.29
M:Q19E,ORF3a:L106F,S:E484A,S:G446S,S:N440K,S:N764K,S:S477N,S:T478K,S:Y145D	0	0.15
M:Q19E,ORF1a:V1887I	0	0.59
M:Q19E,S:E484A,S:K417N,S:N764K,S:R346K,S:Y145D	0	0.15
M:Q19E,N:D343G,ORF3a:L106F,S:K417N,S:N764K,S:S477N,S:T478K,S:Y145D	0	0.15
M:Q19E,S:N764K	0	0.29
M:Q19E,S:K417N,S:N440K,S:N764K,S:Y145D	0	0.15
M:Q19E,S:N764K,S:R346K	0	0.15
M:Q19E,ORF1a:V1887I,S:G446S,S:K417N,S:N764K,S:S477N,S:T478K,S:Y145D	0	0.15
M:Q19E,ORF1a:V1887I,S:E484A,S:G446S,S:K417N,S:N764K,S:S477N,S:T478K	0	0.15
M:Q19E,S:N764K,S:R346K,S:Y145D	0	1.46
S:N764K,S:R346K,S:Y145D	0	0.15
M:Q19E,N:D343G,ORF3a:L106F,S:E484A,S:G446S,S:K417N,S:N440K,S:N764K,S:R346K,S:S477N,S:T478K,S:Y145D	0	0.15
M:Q19E,N:D343G,ORF3a:L106F,S:E484A,S:G446S,S:N440K,S:N764K,S:S477N,S:T478K,S:Y145D	0	0.15
M:Q19E,ORF1a:V1887I,S:A701V,S:E484A,S:G446S,S:N440K,S:N764K,S:S477N,S:T478K	0	0.15
M:Q19E,S:E484A,S:K417N,S:N440K,S:N764K,S:R346K,S:S477N,S:T478K,S:Y145D	0	0.15
M:Q19E,S:E484A,S:K417N,S:N440K,S:N764K,S:S477N,S:T478K,S:Y145D	0	0.15

## Sheet: haplotypes_ba2
Supplementary Table 4. SARS-CoV-2 Omicron haplotypes variability in the Russian and Global datasets
haplotype	frequency russia	frequency world
M:Q19E,ORF1a:E2042A,ORF1a:T3090I,ORF6:D61L,S:E484A,S:G142D,S:S477N,S:T478K,S:V213G	13.58	0
M:Q19E,ORF6:D61L,S:G142D,S:K417N,S:N440K,S:N764K	6.17	1.37
ORF1a:E2042A,ORF1a:T3090I,ORF6:D61L,S:E484A,S:G142D,S:S477N,S:T478K,S:V213G	4.94	0
M:Q19E,ORF1a:T3090I,ORF6:D61L,S:E484A,S:K417N,S:N440K,S:N764K,S:S477N,S:T478K	4.94	0
M:Q19E,ORF1a:T3090I,S:G142D,S:K417N,S:N440K,S:N764K	3.7	0
M:Q19E,ORF1a:T3090I,S:K417N,S:N440K,S:N764K,S:R408S	3.7	0
S:K417N,S:N440K,S:N764K	2.47	0
M:Q19E,ORF1a:T3090I,ORF6:D61L,S:E484A,S:G142D,S:S477N,S:T478K,S:V213G	2.47	0
M:Q19E,ORF1a:T3090I,ORF6:D61L,S:E484A,S:K417N,S:N440K,S:N764K,S:R408S,S:S477N,S:T478K	2.47	0
ORF1a:T3090I,ORF6:D61L,S:E484A,S:K417N,S:N440K,S:N764K,S:S477N,S:T478K	2.47	0
ORF1b:L1423F,ORF6:D61L,S:G142D,S:K417N,S:N440K,S:N764K	2.47	0
M:Q19E,ORF1a:T3090I,ORF6:D61L,S:E484A,S:G142D,S:N764K,S:S477N,S:T478K,S:V213G	2.47	0
M:Q19E,ORF1a:T3090I,S:E484A,S:K417N,S:N440K,S:N764K,S:R408S,S:S477N,S:T478K	2.47	0
M:Q19E,ORF1a:T3090I,S:E484A,S:K417N,S:N440K,S:N764K,S:S477N,S:T478K	2.47	0
M:Q19E,S:K417N,S:N440K,S:N764K,S:R408S	2.47	0
M:Q19E,ORF1b:L1423F,ORF6:D61L,S:E484A,S:K417N,S:N440K,S:N764K,S:S477N,S:T478K	1.23	0
M:Q19E,ORF1a:T3090I,ORF6:D61L,S:E484A,S:G142D,S:K417N,S:N440K,S:N764K,S:R408S,S:S477N,S:T478K,S:V213G	1.23	68.49
M:Q19E,ORF1a:T3090I,ORF6:D61L,S:E484A,S:G142D,S:K417N,S:N440K,S:N764K,S:S477N,S:T478K	1.23	0
M:Q19E,ORF1a:E2042A,ORF1a:T3090I,ORF6:D61L,S:E484A,S:G142D,S:N764K,S:S477N,S:T478K,S:V213G	1.23	0
M:Q19E,ORF1a:T3090I,S:K417N,S:N440K,S:N764K	1.23	0
ORF6:D61L,S:E484A,S:K417N,S:N440K,S:N764K,S:S477N,S:T478K	1.23	0
M:Q19E,ORF1a:E2042A,ORF1a:T3090I,ORF6:D61L,S:E484A,S:G142D,S:I1227V,S:K417N,S:N440K,S:N764K,S:R408S,S:S477N,S:T478K,S:V213G	1.23	0
ORF1a:T3090I,ORF1b:L1423F,ORF6:D61L,S:E484A,S:G142D,S:S477N,S:T478K,S:V213G	1.23	0
M:Q19E,ORF6:D61L,S:K417N,S:N764K,S:R408S	1.23	0
ORF6:D61L,S:G142D,S:K417N,S:N440K,S:N764K	1.23	0
M:Q19E,ORF1a:T3090I,ORF6:D61L,S:E484A,S:K417N,S:N440K,S:N764K,S:S477N	1.23	0
ORF6:D61L,S:K417N,S:N440K,S:N764K	1.23	0
ORF1a:T3090I,ORF6:D61L,S:K417N,S:N440K,S:N764K,S:R408S	1.23	0
S:K417N,S:N440K,S:N764K,S:R408S	1.23	0
M:Q19E,ORF1a:E2042A,ORF1a:T3090I,ORF6:D61L,S:E484A,S:G142D,S:I1227V,S:N764K,S:S477N,S:T478K,S:V213G	1.23	0
M:Q19E,ORF1a:E2042A,ORF1a:T3090I,ORF6:D61L,S:E484A,S:K417N,S:N440K,S:N764K,S:S477N,S:T478K	1.23	0
M:Q19E,ORF1a:E2042A,ORF1a:T3090I,ORF6:D61L,S:E484A,S:G142D,S:K417N,S:N440K,S:N764K,S:S477N,S:T478K	1.23	0
M:Q19E,ORF1a:E2042A,ORF1a:T3090I,ORF6:D61L,S:E484A,S:G142D,S:I1227V,S:S477N,S:T478K,S:V213G	1.23	0
M:Q19E,ORF1a:T3090I,ORF6:D61L,S:K417N,S:N440K,S:N764K	1.23	0
ORF1a:T3090I,S:E484A,S:K417N,S:N440K,S:N764K,S:S477N,S:T478K	1.23	0
ORF1a:T3090I,S:K417N,S:N440K,S:N764K,S:R408S	1.23	0
M:Q19E,S:E484A,S:G142D,S:K417N,S:N440K,S:N764K,S:R408S,S:S477N,S:T478K	1.23	0
ORF1a:T3090I,ORF6:D61L,S:E484A,S:G142D,S:S477N,S:T478K,S:V213G	1.23	0
M:Q19E,ORF1a:T3090I,S:E484A,S:K417N,S:N440K,S:N764K,S:R408S,S:S477N	1.23	0
M:Q19E,ORF1a:T3090I,S:K417N,S:N440K,S:N764K,S:S477N	1.23	0
M:Q19E,ORF1a:T3090I,ORF1b:L1423F,ORF6:D61L,S:E484A,S:K417N,S:N440K,S:N764K,S:S477N,S:T478K	1.23	0
M:Q19E,ORF1a:T3090I,S:E484A,S:G142D,S:K417N,S:N440K,S:N764K,S:R408S,S:S477N,S:T478K	1.23	0
ORF1a:T3090I,S:E484A,S:K417N,S:N440K,S:N764K,S:R408S,S:S477N,S:T478K	1.23	0
M:Q19E,S:K417N,S:N440K,S:N764K	1.23	0
M:Q19E,ORF1a:T3090I,S:E484A,S:G142D,S:K417N,S:N440K,S:N764K,S:S477N,S:T478K	1.23	0
M:Q19E,ORF1a:T3090I,ORF1b:L1423F,ORF6:D61L,S:K417N,S:N440K,S:N764K	1.23	0
M:Q19E,S:G142D,S:K417N,S:N440K,S:N764K	1.23	0
M:Q19E,ORF1a:T3090I,ORF6:D61L,S:E484A,S:G142D,S:K417N,S:N440K,S:R408S,S:S477N,S:T478K,S:V213G	1.23	0
M:Q19E,ORF1a:T3090I,ORF6:D61L,S:G142D,S:K417N,S:N440K,S:N764K	0	1.37
M:Q19E,ORF6:D61L,S:G142D,S:K417N,S:N440K,S:N764K,S:R408S,S:V213G	0	1.37
M:Q19E,ORF1a:T3090I,ORF6:D61L,S:E484A,S:G142D,S:K417N,S:N440K,S:N764K,S:S477N,S:T478K,S:V213G	0	4.11
M:Q19E,ORF1a:T3090I,ORF6:D61L,S:E484A,S:G142D,S:N440K,S:N764K,S:R408S,S:S477N,S:T478K,S:V213G	0	4.11
M:Q19E,ORF1a:T3090I,ORF6:D61L,S:G142D,S:K417N,S:N440K,S:N764K,S:R408S,S:V213G	0	2.74
M:Q19E,ORF1a:T3090I,ORF6:D61L,S:G142D,S:N764K,S:V213G	0	1.37
M:Q19E,ORF1a:T3090I,ORF6:D61L,S:E484A,S:K417N,S:N764K,S:R408S,S:S477N,S:T478K,S:V213G	0	1.37
ORF1a:T3090I,ORF6:D61L,S:E484A,S:K417N,S:N440K,S:N764K,S:R408S,S:S477N,S:T478K,S:V213G	0	1.37
M:Q19E,ORF6:D61L,S:G142D,S:V213G	0	1.37
M:Q19E,ORF1a:T3090I,ORF6:D61L,S:E484A,S:G142D,S:K417N,S:N764K,S:R408S,S:S477N,S:T478K,S:V213G	0	6.85
M:Q19E,ORF1a:T3090I,ORF6:D61L,S:G142D,S:K417N,S:N764K,S:R408S,S:V213G	0	2.74
ORF1a:T3090I,ORF6:D61L,S:E484A,S:G142D,S:K417N,S:N440K,S:N764K,S:R408S,S:S477N,S:T478K,S:V213G	0	1.37
