# Supplementary material for: Genomic Variability of SARS-CoV-2 Omicron Variant Circulating in the Russian Federation during Early December 2021 and Late January 2022
Source: Pathogens. 2022 Dec 2;11(12):1461. doi: 10.3390/pathogens11121461 (PMC9786029; doi:10.3390/pathogens11121461)
Supplement: Supplementary file 1 [file pathogens-11-01461-s001.zip › TableS5.xlsx]

## Sheet: Discontinuous epitopes
Supplementary Table S5. Information about of Neutralizing antibody epitopes identification in SARS-CoV-2 Omicron lineages
Epitope ID	Object Type	Description	Epitope Modified Residue(s)	Epitope Modification(s)	Starting Position	Ending Position	Non-peptidic epitope Accession	Epitope Synonyms	Antigen Name	Antigen Accession	Parent Protein	Parent Protein Accession	Organism Name	Parent Organism	Parent Organism ID	Epitope Comments	Epitope Relationship	Object Type	Description	Starting Position	Ending Position	Non-peptidic object Accession	Synonyms	Antigen Name	Parent Protein	Organism Name	Parent Organism	BA.1 mutation	BA.2 mutation
1864092	Discontinuous peptide	Y369, N370, S371, A372, F374, F377, K378, C379, Y380, G381, V382, S383, P384, T385, K386, L390, F429, T430, F515, E516, L517							Spike glycoprotein	P0DTC2.1	Spike glycoprotein	P0DTC2	Severe acute respiratory syndrome coronavirus 2	Severe acute respiratory syndrome coronavirus 2	2697049	[PMID: 32245784].												1	1
1074326	Discontinuous peptide	A475, V483, F486, S494							surface glycoprotein [Severe acute respiratory syndrome coronavirus 2]	QHD43416.1	Spike glycoprotein	P0DTC2	Severe acute respiratory syndrome coronavirus 2	Severe acute respiratory syndrome coronavirus 2	2697049													0	0
1074327	Discontinuous peptide	Y369, N370, A372, F374, T376, F377, K378, Y380, V382, P384, T385, K386, D389, L390, F392, D428, F429, T430, F515, L517, H519							surface glycoprotein [Severe acute respiratory syndrome coronavirus 2]	QHD43416.1	Spike glycoprotein	P0DTC2	Severe acute respiratory syndrome coronavirus 2	Severe acute respiratory syndrome coronavirus 2	2697049	The epitope residues on SARS-CoV-2 were determined in the cited reference: Yuan et al. (2020) Science [PMID:32245784].												1	1
1334439	Discontinuous peptide	R346, K444, G446, G447, N448, Y449, N450, L452, V483, E484, G485, F490, S494							surface glycoprotein [Severe acute respiratory syndrome coronavirus 2]	QHD43416.1	Spike glycoprotein	P0DTC2	Severe acute respiratory syndrome coronavirus 2	Severe acute respiratory syndrome coronavirus 2	2697049	The epitope residues were determined in the cited reference: Ju et al. (2020) Nature 584(7819):115-119 [PMID: 32454513].												1	1
1075136	Discontinuous peptide	R403, Q409, T415, G416, K417, D420, Y421, L455, F456, R457, K458, S459, N460, Y473, Q474, A475, G476, S477, F486, N487, Y489, F490, Q493,Y495, G496, Q498, N501, G502, Y505							surface glycoprotein [Severe acute respiratory syndrome coronavirus 2]	QHD43416.1	Spike glycoprotein	P0DTC2	Severe acute respiratory syndrome coronavirus 2	Severe acute respiratory syndrome coronavirus 2	2697049													1	1
1336265	Discontinuous peptide	R403, D405, E406, R408, Q409, T415, G416, K417, D420, Y421, L455, F456, R457, K458, N460, Y473, Q474, A475, G476, S477, F486, N487, Y489, Q493, Y495, G502, Y505							surface glycoprotein [Severe acute respiratory syndrome coronavirus 2]	QHD43416.1	Spike glycoprotein	P0DTC2	Severe acute respiratory syndrome coronavirus 2	Severe acute respiratory syndrome coronavirus 2	2697049	The epitope was determined in the cited reference: [PMID:32454512].												1	1
1087140	Discontinuous peptide	G446, Y449, E484, G485, F486, Y489, F490, L492, Q493, S494, G496, Q498, N501, Y505							surface glycoprotein [Severe acute respiratory syndrome coronavirus 2]	YP_009724390.1	Spike glycoprotein	P0DTC2	Severe acute respiratory syndrome coronavirus 2	Severe acute respiratory syndrome coronavirus 2	2697049	The epitope residues were calculated from [PDB: 7BYR] as the antigen residues at 4&Aring; atomic distance from the antibody.												1	1
1087186	Discontinuous peptide	Y369, N370, S375, T376, F377, K378, C379, Y380, G381, V382, S383, P384, T385, K386, L390, F392, D428, T430, E516, L517							surface glycoprotein [Severe acute respiratory syndrome coronavirus 2]	QHD43416.1	Spike glycoprotein	P0DTC2	Severe acute respiratory syndrome coronavirus 2	Severe acute respiratory syndrome coronavirus 2	2697049	The epitope residues were calculated from [PDB: 6YM0, 6YLA, 6YOR] as the antigen residues at 4&Aring; atomic distance from the antibody.												1	1
1087266	Discontinuous peptide	R403, D405, R408, T415, G416, K417, D420, Y421, Y453, L455, F456, R457, K458, S459, N460, Y473, Q474, A475, G476, S477, F486, N487, Y489, Q493, S494, Y495, G496, Q498, T500, N501, G502, Y505							surface glycoprotein [Severe acute respiratory syndrome coronavirus 2]	QHD43416.1	Spike glycoprotein	P0DTC2	Severe acute respiratory syndrome coronavirus 2	Severe acute respiratory syndrome coronavirus 2	2697049	The epitope residues were calculated from [PDB: 6XC2] as the antigen residues at 4&Aring; atomic distance from the antibody.												1	1
1087267	Discontinuous peptide	R403, D405, T415, G416, K417, D420, Y421, Y453, L455, F456, R457, K458, N460, Y473, A475, G476, S477, F486, N487, Y489, Y495, N501, Y505							surface glycoprotein [Severe acute respiratory syndrome coronavirus 2]	QHD43416.1	Spike glycoprotein	P0DTC2	Severe acute respiratory syndrome coronavirus 2	Severe acute respiratory syndrome coronavirus 2	2697049	The epitope residues were calculated from [PDB: 6XC4] as the antigen residues at 4&Aring; atomic distance from the antibody.												1	1
1087268	Discontinuous peptide	Y144, Y145, H146, K147, K150, W152, H245, R246, S247, Y248, L249							surface glycoprotein [Severe acute respiratory syndrome coronavirus 2]	QHD43416.1	Spike glycoprotein	P0DTC2	Severe acute respiratory syndrome coronavirus 2	Severe acute respiratory syndrome coronavirus 2	2697049	The epitope residues were calculated from [PDB: 7C2L] as the antigen residues at 4&Aring; atomic distance from the antibody.												1	1
1125015	Discontinuous peptide	A372, F374, C379							surface glycoprotein [Severe acute respiratory syndrome coronavirus 2]	YP_009724390.1	Spike glycoprotein	P0DTC2	Severe acute respiratory syndrome coronavirus 2	Severe acute respiratory syndrome coronavirus 2	2697049													0	0
1125016	Discontinuous peptide	F374, S375, T376, F377, C379, F392, D427, E516							surface glycoprotein [Severe acute respiratory syndrome coronavirus 2]	YP_009724390.1	Spike glycoprotein	P0DTC2	Severe acute respiratory syndrome coronavirus 2	Severe acute respiratory syndrome coronavirus 2	2697049													1	1
1181324	Discontinuous peptide	L455, A475, G502							surface glycoprotein [Severe acute respiratory syndrome coronavirus 2]	QHD43416.1	Spike glycoprotein	P0DTC2	Severe acute respiratory syndrome coronavirus 2	Severe acute respiratory syndrome coronavirus 2	2697049													0	0
1181325	Discontinuous peptide	Y449, Y453, L455, F456, E484, G485, F486, Y489, F490, L492, Q493, S494							surface glycoprotein [Severe acute respiratory syndrome coronavirus 2]	QHD43416.1	Spike glycoprotein	P0DTC2	Severe acute respiratory syndrome coronavirus 2	Severe acute respiratory syndrome coronavirus 2	2697049	The epitope residues were calculated from [PDB: 6XEY] as the antigen residues at 4&Aring; atomic distance from the antibody.												1	1
1307796	Discontinuous peptide	Y369, S375, F377, K378, C379, Y380, G381, V382, S383, P384, T385, K386, F392, P412, G413, D427, D428, F429, L517							surface glycoprotein [Severe acute respiratory syndrome coronavirus 2]	QHD43416.1	Spike glycoprotein	P0DTC2	Severe acute respiratory syndrome coronavirus 2	Severe acute respiratory syndrome coronavirus 2	2697049	The epitope residues were calculated from [PDB: 6ZCZ] as the antigen residues at 4&Aring; atomic distance from the antibody.												1	1
1309150	Discontinuous peptide	Y369, N370, F374, S375, T376, F377, K378, C379, Y380, G381, V382, S383, P384, T385, K386, L390, R408, D428, T430, L517, L518							surface glycoprotein [Severe acute respiratory syndrome coronavirus 2]	QHD43416.1	Spike glycoprotein	P0DTC2	Severe acute respiratory syndrome coronavirus 2	Severe acute respiratory syndrome coronavirus 2	2697049	The epitope residues were calculated from [PDB: 6Z2M] as the antigen residues at 4&Aring; atomic distance from the antibody.												1	1
1310987	Discontinuous peptide	N334, L335, P337, G339, E340, N343, A344, T345, R346, K356, R357, S359, N360, C361, L441							surface glycoprotein [Severe acute respiratory syndrome coronavirus 2]	YP_009724390.1	Spike glycoprotein	P0DTC2	Severe acute respiratory syndrome coronavirus 2	Severe acute respiratory syndrome coronavirus 2	2697049	The epitope residues were calculated from [PDB: 6WPS] as the antigen residues at 4&Aring; atomic distance from the antibody. [PDB: 6WPT] contains additional contact residues N354 and R509.												1	1
1310988	Discontinuous peptide	G446, Y449, Y453, L455, F456, A475, G476, S477, T478, G485, F486, N487, Y489, Q493, Y495, Q498, N501, Y505							surface glycoprotein [Severe acute respiratory syndrome coronavirus 2]	QHD43416.1	Spike glycoprotein	P0DTC2	Severe acute respiratory syndrome coronavirus 2	Severe acute respiratory syndrome coronavirus 2	2697049	The epitope residues were calculated from [PDB: 6XKQ] as the antigen residues at 4&Aring; atomic distance from the antibody.												1	1
1310989	Discontinuous peptide	R346, F347, S349, Y351, K444, G446, G447, N448, Y449, N450, Y451, L452, T470, E484, F490, L492, Q493, S494							surface glycoprotein [Severe acute respiratory syndrome coronavirus 2]	QHD43416.1	Spike glycoprotein	P0DTC2	Severe acute respiratory syndrome coronavirus 2	Severe acute respiratory syndrome coronavirus 2	2697049	The epitope residues were calculated from [PDB: 6XKQ] as the antigen residues at 4&Aring; atomic distance from the antibody.												1	1
1311114	Discontinuous peptide	L455, Y473, A475, G476, S477, E484, G485, F486, N487, C488, Y489							surface glycoprotein [Severe acute respiratory syndrome coronavirus 2]	YP_009724390.1	Spike glycoprotein	P0DTC2	Severe acute respiratory syndrome coronavirus 2	Severe acute respiratory syndrome coronavirus 2	2697049	The epitope residues were calculated from [PDB: 7K45] as the antigen residues at 4&Aring; atomic distance from the antibody.												1	1
1311119	Discontinuous peptide on multi chain	A: G446, Y449, L452, L455, F456, E484, G485, F486, Y489, F490, L492, Q493, S494, G496; B: F342, N343, L368, S371, A372, S373, W436, N440, L441					YP_009724390.1				Spike glycoprotein	P0DTC2	Severe acute respiratory syndrome coronavirus 2	Severe acute respiratory syndrome coronavirus 2	2697049	The epitope residues were calculated from [PDB: 7K43] as the antigen residues at 4&Aring; atomic distance from the antibody.												1	1
1311243	Discontinuous peptide	G446, Y449, N481, G482, V483, E484, G485, F486, F490, S494							surface glycoprotein [Severe acute respiratory syndrome coronavirus 2]	QHD43416.1	Spike glycoprotein	P0DTC2	Severe acute respiratory syndrome coronavirus 2	Severe acute respiratory syndrome coronavirus 2	2697049	The epitope residues were calculated from [PDB: 7JV2] as the antigen residues at 4&Aring; atomic distance from the antibody.												1	1
1311244	Discontinuous peptide	K444, G446, Y449, N450, L452, N481, G482, V483, E484, G485, F490							surface glycoprotein [Severe acute respiratory syndrome coronavirus 2]	QHD43416.1	Spike glycoprotein	P0DTC2	Severe acute respiratory syndrome coronavirus 2	Severe acute respiratory syndrome coronavirus 2	2697049	The epitope residues were calculated from [PDB: 7CHH] as the antigen residues at 4&Aring; atomic distance from the antibody.												1	1
1311245	Discontinuous peptide	N334, L335, P337, G339, E340, N343, A344, T345, R346, K356, R357, S359, C361, L441							surface glycoprotein [Severe acute respiratory syndrome coronavirus 2]	QHD43416.1	Spike glycoprotein	P0DTC2	Severe acute respiratory syndrome coronavirus 2	Severe acute respiratory syndrome coronavirus 2	2697049	The epitope residues were calculated from [PDB: 7JX3] as the antigen residues at 4&Aring; atomic distance from the antibody.												1	1
1311246	Discontinuous peptide	R403, D405, T415, G416, K417, D420, Y421, Y453, L455, F456, R457, K458, N460, Y473, Q474, A475, G476, S477, T478, F486, N487, Y489, Q493, N501, Y505							surface glycoprotein [Severe acute respiratory syndrome coronavirus 2]	QHD43416.1	Spike glycoprotein	P0DTC2	Severe acute respiratory syndrome coronavirus 2	Severe acute respiratory syndrome coronavirus 2	2697049	The epitope residues were calculated from [PDB: 7CH5] as the antigen residues at 4&Aring; atomic distance from the antibody.												1	1
1311247	Discontinuous peptide	R403, T415, G416, K417, D420, Y421, Y453, L455, F456, R457, K458, N460, Y473, A475, G476, S477, F486, N487, Y489, Q493, S494, Y495, G496, Q498, T500, N501, G502, V503, Y505							surface glycoprotein [Severe acute respiratory syndrome coronavirus 2]	QHD43416.1	Spike glycoprotein	P0DTC2	Severe acute respiratory syndrome coronavirus 2	Severe acute respiratory syndrome coronavirus 2	2697049	The epitope residues were calculated from [PDB: 7CHB, 7CHE] as the antigen residues at 4&Aring; atomic distance from the antibody.												1	1
1311248	Discontinuous peptide	R403, T415, G416, K417, D420, Y421, Y453, L455, R457, K458, S459, N460, Y473, Q474, A475, G476, S477, F486, N487, Y489, Q493, Q498, T500, N501, G502, V503, Y505							surface glycoprotein [Severe acute respiratory syndrome coronavirus 2]	QHD43416.1	Spike glycoprotein	P0DTC2	Severe acute respiratory syndrome coronavirus 2	Severe acute respiratory syndrome coronavirus 2	2697049	The epitope residues were calculated from [PDB: 7CH4] as the antigen residues at 4&Aring; atomic distance from the antibody.												1	1
1311249	Discontinuous peptide	R403, V445, G446, Y449, Y453, L455, F456, N487, Y489, Q493, Y495, G496, Q498, P499, T500, N501, G502, Y505							surface glycoprotein [Severe acute respiratory syndrome coronavirus 2]	QHD43416.1	Spike glycoprotein	P0DTC2	Severe acute respiratory syndrome coronavirus 2	Severe acute respiratory syndrome coronavirus 2	2697049	The epitope residues were calculated from [PDB: 7JX3] as the antigen residues at 4&Aring; atomic distance from the antibody.												1	1
1311250	Discontinuous peptide	T415, G416, K417, D420, Y421, Y453, L455, F456, R457, K458, S459, N460, Y473, Q474, A475, G476, S477, F486, N487, Y489, Q493, S494, Y495, G496, Q498, T500, N501, G502, Y505							surface glycoprotein [Severe acute respiratory syndrome coronavirus 2]	QHD43416.1	Spike glycoprotein	P0DTC2	Severe acute respiratory syndrome coronavirus 2	Severe acute respiratory syndrome coronavirus 2	2697049													1	1
1311252	Discontinuous peptide	Y369, N370, F377, K378, C379, Y380, G381, V382, S383, P384, T385, K386, N388, L390, F392, P412, Q414, D427, D428, F429, T430, L517							surface glycoprotein [Severe acute respiratory syndrome coronavirus 2]	QHD43416.1	Spike glycoprotein	P0DTC2	Severe acute respiratory syndrome coronavirus 2	Severe acute respiratory syndrome coronavirus 2	2697049	The epitope residues were calculated from [PDB: 7JX3] as the antigen residues at 4&Aring; atomic distance from the antibody.												0	0
1311253	Discontinuous peptide	Y369, N370, S371, A372, F374, S375, T376, F377, K378, C379, S383, P384, T385, R408, Q414							surface glycoprotein [Severe acute respiratory syndrome coronavirus 2]	QHD43416.1	Spike glycoprotein	P0DTC2	Severe acute respiratory syndrome coronavirus 2	Severe acute respiratory syndrome coronavirus 2	2697049	The epitope was determined in the cited reference: [PMID: 32991844].												1	1
1314084	Discontinuous peptide	D420, A475, N487							surface glycoprotein [Severe acute respiratory syndrome coronavirus 2]	QHD43416.1	Spike glycoprotein	P0DTC2	Severe acute respiratory syndrome coronavirus 2	Severe acute respiratory syndrome coronavirus 2	2697049	[PMID: 33259788].												0	0
1314085	Discontinuous peptide	E484, F490							surface glycoprotein [Severe acute respiratory syndrome coronavirus 2]	QHD43416.1	Spike glycoprotein	P0DTC2	Severe acute respiratory syndrome coronavirus 2	Severe acute respiratory syndrome coronavirus 2	2697049													1	1
1314086	Discontinuous peptide	F486, N487							surface glycoprotein [Severe acute respiratory syndrome coronavirus 2]	QHD43416.1	Spike glycoprotein	P0DTC2	Severe acute respiratory syndrome coronavirus 2	Severe acute respiratory syndrome coronavirus 2	2697049	[PMID: 33259788].												0	0
1314089	Discontinuous peptide	S443, V445, G446, G447, Y449, G496, Q498, P499, T500							surface glycoprotein [Severe acute respiratory syndrome coronavirus 2]	QHD43416.1	Spike glycoprotein	P0DTC2	Severe acute respiratory syndrome coronavirus 2	Severe acute respiratory syndrome coronavirus 2	2697049													1	1
1314092	Discontinuous peptide	T376, K378, R408, K417							surface glycoprotein [Severe acute respiratory syndrome coronavirus 2]	QHD43416.1	Spike glycoprotein	P0DTC2	Severe acute respiratory syndrome coronavirus 2	Severe acute respiratory syndrome coronavirus 2	2697049													1	1
1334440	Discontinuous peptide	R403, T415, G416, K417, D420, Y421, Y453, L455, F456, R457, K458, S459, N460, Y473, Q474, A475, G476, S477, F486, N487, Y489, Q493, G502, Y505							surface glycoprotein [Severe acute respiratory syndrome coronavirus 2]	QHD43416.1	Spike glycoprotein	P0DTC2	Severe acute respiratory syndrome coronavirus 2	Severe acute respiratory syndrome coronavirus 2	2697049	The epitope residues were calculated from [PDB: 7CDI] as the antigen residues at 4&Aring; atomic distance from the antibody.												1	1
1334441	Discontinuous peptide	V445, G446, Y449, F456, T478, N481, V483, E484, G485, F486, N487, Y489, F490, L492, Q493, S494, Q498, T500							surface glycoprotein [Severe acute respiratory syndrome coronavirus 2]	QHD43416.1	Spike glycoprotein	P0DTC2	Severe acute respiratory syndrome coronavirus 2	Severe acute respiratory syndrome coronavirus 2	2697049	The epitope residues were calculated from [PDB: 7CDJ] as the antigen residues at 4&Aring; atomic distance from the antibody.												1	1
1334512	Discontinuous peptide	A123, G142, Y144, F157, R158, N164							surface glycoprotein [Severe acute respiratory syndrome coronavirus 2]	QHD43416.1	Spike glycoprotein	P0DTC2	Severe acute respiratory syndrome coronavirus 2 Wuhan/Hu-1/2019	Severe acute respiratory syndrome coronavirus 2 Wuhan/Hu-1/2019	10002370													1	1
1334513	Discontinuous peptide	F140, Y144							surface glycoprotein [Severe acute respiratory syndrome coronavirus 2]	QHD43416.1	Spike glycoprotein	P0DTC2	Severe acute respiratory syndrome coronavirus 2 Wuhan/Hu-1/2019	Severe acute respiratory syndrome coronavirus 2 Wuhan/Hu-1/2019	10002370													1	1
1334676	Discontinuous peptide	K417, E484, N501, R683							surface glycoprotein [Severe acute respiratory syndrome coronavirus 2]	QJR89829.1	Spike glycoprotein	P0DTC2	Severe acute respiratory syndrome coronavirus 2	Severe acute respiratory syndrome coronavirus 2	2697049													1	1
1392000	Discontinuous peptide	N440							Spike glycoprotein	P0DTC2.1	Spike glycoprotein	P0DTC2	Severe acute respiratory syndrome coronavirus 2	Severe acute respiratory syndrome coronavirus 2	2697049													1	1
1334684	Discontinuous peptide	E484, F490, Q493							surface glycoprotein [Severe acute respiratory syndrome coronavirus 2]	QHZ00379.1	Spike glycoprotein	P0DTC2	Severe acute respiratory syndrome coronavirus 2	Severe acute respiratory syndrome coronavirus 2	2697049													1	1
1334685	Discontinuous peptide	E484, Q493							surface glycoprotein [Severe acute respiratory syndrome coronavirus 2]	QHZ00379.1	Spike glycoprotein	P0DTC2	Severe acute respiratory syndrome coronavirus 2	Severe acute respiratory syndrome coronavirus 2	2697049													1	1
1334686	Discontinuous peptide	R346, N440							surface glycoprotein [Severe acute respiratory syndrome coronavirus 2]	QHZ00379.1	Spike glycoprotein	P0DTC2	Severe acute respiratory syndrome coronavirus 2	Severe acute respiratory syndrome coronavirus 2	2697049													1	1
1335408	Discontinuous peptide	R403, D405, T415, G416, K417, D420, Y421, Y453, L455, F456, R457, K458, N460, Y473, A475, G476, F486, N487, Y489, Q493, S494, Y495, G496, Q498, T500, N501, G502, G504, Y505							surface glycoprotein [Severe acute respiratory syndrome coronavirus 2]	YP_009724390.1	Spike glycoprotein	P0DTC2	Severe acute respiratory syndrome coronavirus 2	Severe acute respiratory syndrome coronavirus 2	2697049	The epitope residues were calculated from [PDB: 7KS9] as the antigen residues at 4&Aring; atomic distance from the antibody.												1	1
1594766	Discontinuous peptide	E484							surface glycoprotein [Severe acute respiratory syndrome coronavirus 2]	QIC50498.1	Spike glycoprotein	P0DTC2	Severe acute respiratory syndrome coronavirus 2 ITA/INMI1/2020	Severe acute respiratory syndrome coronavirus 2 ITA/INMI1/2020	10002380													1	1
1335916	Discontinuous peptide	F377							surface glycoprotein [Severe acute respiratory syndrome coronavirus 2]	YP_009724390.1	Spike glycoprotein	P0DTC2	Severe acute respiratory syndrome coronavirus 2	Severe acute respiratory syndrome coronavirus 2	2697049													0	0
1335917	Discontinuous peptide	F377, E516							surface glycoprotein [Severe acute respiratory syndrome coronavirus 2]	YP_009724390.1	Spike glycoprotein	P0DTC2	Severe acute respiratory syndrome coronavirus 2	Severe acute respiratory syndrome coronavirus 2	2697049													0	0
1335918	Discontinuous peptide	F377, K386, L390							surface glycoprotein [Severe acute respiratory syndrome coronavirus 2]	YP_009724390.1	Spike glycoprotein	P0DTC2	Severe acute respiratory syndrome coronavirus 2	Severe acute respiratory syndrome coronavirus 2	2697049													0	0
1335919	Discontinuous peptide	F377, T385, L390							surface glycoprotein [Severe acute respiratory syndrome coronavirus 2]	YP_009724390.1	Spike glycoprotein	P0DTC2	Severe acute respiratory syndrome coronavirus 2	Severe acute respiratory syndrome coronavirus 2	2697049													0	0
1335920	Discontinuous peptide	F377, Y508, E516							surface glycoprotein [Severe acute respiratory syndrome coronavirus 2]	YP_009724390.1	Spike glycoprotein	P0DTC2	Severe acute respiratory syndrome coronavirus 2	Severe acute respiratory syndrome coronavirus 2	2697049													0	0
1852153	Discontinuous peptide	F486							Spike glycoprotein	P0DTC2.1	Spike glycoprotein	P0DTC2	Severe acute respiratory syndrome coronavirus 2	Severe acute respiratory syndrome coronavirus 2	2697049													0	0
1597452	Discontinuous peptide	F490							Spike glycoprotein	P0DTC2.1	Spike glycoprotein	P0DTC2	Severe acute respiratory syndrome coronavirus 2	Severe acute respiratory syndrome coronavirus 2	2697049													0	0
1336254	Discontinuous peptide	G446							surface glycoprotein [Severe acute respiratory syndrome coronavirus 2]	QHD43416.1	Spike glycoprotein	P0DTC2	Severe acute respiratory syndrome coronavirus 2 Wuhan/Hu-1/2019	Severe acute respiratory syndrome coronavirus 2 Wuhan/Hu-1/2019	10002370													1	1
1335926	Discontinuous peptide	G476, N501, Y508							surface glycoprotein [Severe acute respiratory syndrome coronavirus 2]	YP_009724390.1	Spike glycoprotein	P0DTC2	Severe acute respiratory syndrome coronavirus 2	Severe acute respiratory syndrome coronavirus 2	2697049													1	1
1335930	Discontinuous peptide	K444							surface glycoprotein [Severe acute respiratory syndrome coronavirus 2]	YP_009724390.1	Spike glycoprotein	P0DTC2	Severe acute respiratory syndrome coronavirus 2	Severe acute respiratory syndrome coronavirus 2	2697049													0	0
1335934	Discontinuous peptide	L441							surface glycoprotein [Severe acute respiratory syndrome coronavirus 2]	YP_009724390.1	Spike glycoprotein	P0DTC2	Severe acute respiratory syndrome coronavirus 2	Severe acute respiratory syndrome coronavirus 2	2697049													0	0
1597454	Discontinuous peptide	L452							Spike glycoprotein	P0DTC2.1	Spike glycoprotein	P0DTC2	Severe acute respiratory syndrome coronavirus 2	Severe acute respiratory syndrome coronavirus 2	2697049													0	0
1335936	Discontinuous peptide	N354, F377, I468							surface glycoprotein [Severe acute respiratory syndrome coronavirus 2]	YP_009724390.1	Spike glycoprotein	P0DTC2	Severe acute respiratory syndrome coronavirus 2	Severe acute respiratory syndrome coronavirus 2	2697049													0	0
1335937	Discontinuous peptide	N354, K356, I468							surface glycoprotein [Severe acute respiratory syndrome coronavirus 2]	YP_009724390.1	Spike glycoprotein	P0DTC2	Severe acute respiratory syndrome coronavirus 2	Severe acute respiratory syndrome coronavirus 2	2697049													0	0
1335938	Discontinuous peptide	N450							surface glycoprotein [Severe acute respiratory syndrome coronavirus 2]	YP_009724390.1	Spike glycoprotein	P0DTC2	Severe acute respiratory syndrome coronavirus 2	Severe acute respiratory syndrome coronavirus 2	2697049													0	0
1335940	Discontinuous peptide	P499							surface glycoprotein [Severe acute respiratory syndrome coronavirus 2]	YP_009724390.1	Spike glycoprotein	P0DTC2	Severe acute respiratory syndrome coronavirus 2	Severe acute respiratory syndrome coronavirus 2	2697049													0	0
1335943	Discontinuous peptide	R403, K417, Y449, N450, L452, Y453, L455, F456, E484, G485, F486, Y489, F490, L492, Q493, S494, Y495, Y505							surface glycoprotein [Severe acute respiratory syndrome coronavirus 2]	YP_009724390.1	Spike glycoprotein	P0DTC2	Severe acute respiratory syndrome coronavirus 2	Severe acute respiratory syndrome coronavirus 2	2697049	The epitope residues were calculated from [PDB: 7CM4] as the antigen residues at 4&Aring; atomic distance from the antibody.												1	1
1392570	Discontinuous peptide	S477							surface glycoprotein [Severe acute respiratory syndrome coronavirus 2]	QHD43416.1	Spike glycoprotein	P0DTC2	Severe acute respiratory syndrome coronavirus 2	Severe acute respiratory syndrome coronavirus 2	2697049													1	1
1335946	Discontinuous peptide	S477, S514							surface glycoprotein [Severe acute respiratory syndrome coronavirus 2]	YP_009724390.1	Spike glycoprotein	P0DTC2	Severe acute respiratory syndrome coronavirus 2	Severe acute respiratory syndrome coronavirus 2	2697049													1	1
1336267	Discontinuous peptide	S494							surface glycoprotein [Severe acute respiratory syndrome coronavirus 2]	QHD43416.1	Spike glycoprotein	P0DTC2	Severe acute respiratory syndrome coronavirus 2 Wuhan/Hu-1/2019	Severe acute respiratory syndrome coronavirus 2 Wuhan/Hu-1/2019	10002370													0	0
1335950	Discontinuous peptide	T345							surface glycoprotein [Severe acute respiratory syndrome coronavirus 2]	YP_009724390.1	Spike glycoprotein	P0DTC2	Severe acute respiratory syndrome coronavirus 2	Severe acute respiratory syndrome coronavirus 2	2697049													0	0
1335952	Discontinuous peptide	T478							surface glycoprotein [Severe acute respiratory syndrome coronavirus 2]	YP_009724390.1	Spike glycoprotein	P0DTC2	Severe acute respiratory syndrome coronavirus 2	Severe acute respiratory syndrome coronavirus 2	2697049													1	1
1335954	Discontinuous peptide	V341, F377, N501, V503, Y508, E516							surface glycoprotein [Severe acute respiratory syndrome coronavirus 2]	YP_009724390.1	Spike glycoprotein	P0DTC2	Severe acute respiratory syndrome coronavirus 2	Severe acute respiratory syndrome coronavirus 2	2697049													1	1
1335955	Discontinuous peptide	V503							surface glycoprotein [Severe acute respiratory syndrome coronavirus 2]	YP_009724390.1	Spike glycoprotein	P0DTC2	Severe acute respiratory syndrome coronavirus 2	Severe acute respiratory syndrome coronavirus 2	2697049													0	0
1335957	Discontinuous peptide	R403, R408, T415, G416, K417, D420, Y421, Y453, L455, F456, R457, K458, N460, Y473, Q474, A475, G476, F486, N487, Y489, Q493, S494, Y495, G496, Q498, T500, N501, G502, Y505							surface glycoprotein [Severe acute respiratory syndrome coronavirus 2]	QHD43416.1	Spike glycoprotein	P0DTC2	Severe acute respiratory syndrome coronavirus 2	Severe acute respiratory syndrome coronavirus 2	2697049	The epitope residues were calculated from [PDB: 7KFW] as the antigen residues at 4&Aring; atomic distance from the antibody.												1	1
1335958	Discontinuous peptide	R403, T415, G416, K417, D420, Y421, Y453, L455, F456, R457, K458, N460, Y473, A475, G476, F486, N487, Y489, Q493, S494, Y495, G496, Q498, T500, N501, G502, Y505							surface glycoprotein [Severe acute respiratory syndrome coronavirus 2]	QHD43416.1	Spike glycoprotein	P0DTC2	Severe acute respiratory syndrome coronavirus 2	Severe acute respiratory syndrome coronavirus 2	2697049	The epitope residues were calculated from [PDB: 7KFV] as the antigen residues at 4&Aring; atomic distance from the antibody.												1	1
1335959	Discontinuous peptide	R403, T415, G416, K417, D420, Y421, Y453, L455, F456, R457, K458, N460, Y473, A475, G476, S477, F486, N487, Y489, Q493, Q498, T500, N501, G502, Y505							surface glycoprotein [Severe acute respiratory syndrome coronavirus 2]	QHD43416.1	Spike glycoprotein	P0DTC2	Severe acute respiratory syndrome coronavirus 2	Severe acute respiratory syndrome coronavirus 2	2697049	The epitope residues were calculated from [PDB: 7KFY] as the antigen residues at 4&Aring; atomic distance from the antibody.												1	1
1335960	Discontinuous peptide	R403, T415, G416, K417, D420, Y421, Y453, L455, F456, R457, K458, N460, Y473, Q474, A475, G476, F486, N487, Y489, Q493, S494, Y495, G496, Q498, T500, N501, G502, Y505							surface glycoprotein [Severe acute respiratory syndrome coronavirus 2]	QHD43416.1	Spike glycoprotein	P0DTC2	Severe acute respiratory syndrome coronavirus 2	Severe acute respiratory syndrome coronavirus 2	2697049	The epitope residues were calculated from [PDB: 7KFX] as the antigen residues at 4&Aring; atomic distance from the antibody.												1	1
1336252	Discontinuous peptide	F456							surface glycoprotein [Severe acute respiratory syndrome coronavirus 2]	QHD43416.1	Spike glycoprotein	P0DTC2	Severe acute respiratory syndrome coronavirus 2 Wuhan/Hu-1/2019	Severe acute respiratory syndrome coronavirus 2 Wuhan/Hu-1/2019	10002370													0	0
1336256	Discontinuous peptide	G485							surface glycoprotein [Severe acute respiratory syndrome coronavirus 2]	QHD43416.1	Spike glycoprotein	P0DTC2	Severe acute respiratory syndrome coronavirus 2 Wuhan/Hu-1/2019	Severe acute respiratory syndrome coronavirus 2 Wuhan/Hu-1/2019	10002370													0	0
1336263	Discontinuous peptide	P384							surface glycoprotein [Severe acute respiratory syndrome coronavirus 2]	QHD43416.1	Spike glycoprotein	P0DTC2	Severe acute respiratory syndrome coronavirus 2	Severe acute respiratory syndrome coronavirus 2	2697049													0	0
1338206	Discontinuous peptide	C136, N137, D138, P139, F140, L141, G142, V143, T307, V308, E309, K310, G311, I312, Y313, Q314, T315, S316, N317, F318, P621,V622, A623, I624, H625, A626, D627, Q628, L629, T630, P631, T632, W633, R634, V635, Y636							surface glycoprotein [Severe acute respiratory syndrome coronavirus 2]	YP_009724390.1	Spike glycoprotein	P0DTC2	Severe acute respiratory syndrome coronavirus 2	Severe acute respiratory syndrome coronavirus 2	2697049													1	1
1338207	Discontinuous peptide	C136, N137, D138, P139, F140, L141, G142, V143, Y144, L242, L244, H245, R246, S247, Y248, L249, T250, P251, G252, D253, S254, S255, S256, G257, W258, T259, A260, G261, A262, A263, A264, Y265							surface glycoprotein [Severe acute respiratory syndrome coronavirus 2]	YP_009724390.1	Spike glycoprotein	P0DTC2	Severe acute respiratory syndrome coronavirus 2	Severe acute respiratory syndrome coronavirus 2	2697049													1	1
1338208	Discontinuous peptide	C136, N137, D138, P139, F140, L141, G142, V143, Y144, V171, S172, Q173, P174, F175, L176, M177, D178, L179, L242, A243, L244, H245, R246, S247, Y248, L249, T250, P251, G252, D253, S254, S255, S256, G257, W258, T259, A260, G261, A262, A263, A264							surface glycoprotein [Severe acute respiratory syndrome coronavirus 2]	YP_009724390.1	Spike glycoprotein	P0DTC2	Severe acute respiratory syndrome coronavirus 2	Severe acute respiratory syndrome coronavirus 2	2697049													1	1
1338212	Discontinuous peptide	R403, D405, T415, G416, K417, D420, Y421, L455, F456, R457, K458, S459, N460, Y473, Q474, A475, G476, S477, F486, N487, Y489, N501, G502, Y505							surface glycoprotein [Severe acute respiratory syndrome coronavirus 2]	YP_009724390.1	Spike glycoprotein	P0DTC2	Severe acute respiratory syndrome coronavirus 2	Severe acute respiratory syndrome coronavirus 2	2697049	The epitope residues were calculated from [PDB: 7KMH] as the antigen residues at 4&Aring; atomic distance from the antibody.												1	1
1338213	Discontinuous peptide	R403, T415, G416, K417, D420, Y421, Y453, L455, R457, K458, N460, Y473, A475, G476, S477, F486, N487, Y489, Q493, S494, Y495, G496, Q498, T500, N501, G502, V503, Y505							surface glycoprotein [Severe acute respiratory syndrome coronavirus 2]	YP_009724390.1	Spike glycoprotein	P0DTC2	Severe acute respiratory syndrome coronavirus 2	Severe acute respiratory syndrome coronavirus 2	2697049	The epitope residues were calculated from [PDB: 7KMI] as the antigen residues at 4&Aring; atomic distance from the antibody.												1	1
1338214	Discontinuous peptide	V433, I434, A435, W436, N437, S438, N439, N440, L441, D442, S443, K444, V445, G446, G447, N448, Y449, N450, Y451, L452, Y453, R454, L455, G496, F497, Q498, P499, T500, N501, G502, V503, G504, Y505, Q506, P507, Y508, R509, V510, V511, V512, L513							surface glycoprotein [Severe acute respiratory syndrome coronavirus 2]	YP_009724390.1	Spike glycoprotein	P0DTC2	Severe acute respiratory syndrome coronavirus 2	Severe acute respiratory syndrome coronavirus 2	2697049													1	1
1862955	Discontinuous peptide	Y351, Y449, L455, T470, N481, G482, V483, E484, G485, F486, C488, Y489, F490, L492, Q493, S494							surface glycoprotein [Severe acute respiratory syndrome coronavirus 2]	QHD43416.1	Spike glycoprotein	P0DTC2	Severe acute respiratory syndrome coronavirus 2	Severe acute respiratory syndrome coronavirus 2	2697049	The epitope was determined in the cited reference: [PMID: 33820835].												1	1
1338222	Discontinuous peptide	Y369, S371, F377, K378, C379, Y380, G381, V382, S383, P384, T385, R408, P412, G413, Q414, T415, G416, D427, D428, F429							surface glycoprotein [Severe acute respiratory syndrome coronavirus 2]	QHD43416.1	Spike glycoprotein	P0DTC2	Severe acute respiratory syndrome coronavirus 2	Severe acute respiratory syndrome coronavirus 2	2697049	The epitope was determined in the cited reference: [PMID:33242394].												1	1
1338776	Discontinuous peptide	T345, N439, N440, S443, K444, V445, G446, G447, N450, Q498, P499, T500, Q506							surface glycoprotein [Severe acute respiratory syndrome coronavirus 2]	YP_009724390.1	Spike glycoprotein	P0DTC2	Severe acute respiratory syndrome coronavirus 2	Severe acute respiratory syndrome coronavirus 2	2697049	The epitope residues were calculated from [PDB: 7LSS] as the antigen residues at 4&Aring; atomic distance from the antibody.												1	1
1338777	Discontinuous peptide	Y351, K444, V445, G446, G447, N448, Y449, N450, L452, T470, E484, F490, L492, Q493, S494, Q498							surface glycoprotein [Severe acute respiratory syndrome coronavirus 2]	YP_009724390.1	Spike glycoprotein	P0DTC2	Severe acute respiratory syndrome coronavirus 2	Severe acute respiratory syndrome coronavirus 2	2697049	The epitope residues were calculated from [PDB: 7LS9] as the antigen residues at 4&Aring; atomic distance from the antibody.												1	1
1338779	Discontinuous peptide	G446, G447, Y449, F456, T470, V483, E484, G485, F486, C488, Y489, F490, P491, L492, Q493, S494, Q498							surface glycoprotein [Severe acute respiratory syndrome coronavirus 2]	QHD43416.1	Spike glycoprotein	P0DTC2	Severe acute respiratory syndrome coronavirus 2	Severe acute respiratory syndrome coronavirus 2	2697049	The epitope residues were calculated from [PDB: 7LOP] as the antigen residues at 4&Aring; atomic distance from the antibody.												1	1
1642872	Discontinuous peptide	K417							Spike glycoprotein	P0DTC2.1	Spike glycoprotein	P0DTC2	Severe acute respiratory syndrome coronavirus 2	Severe acute respiratory syndrome coronavirus 2	2697049													1	1
1338781	Discontinuous peptide	K417, L455, F456, T470, E471, I472							surface glycoprotein [Severe acute respiratory syndrome coronavirus 2]	QHD43416.1	Spike glycoprotein	P0DTC2	Severe acute respiratory syndrome coronavirus 2	Severe acute respiratory syndrome coronavirus 2	2697049													1	1
1338782	Discontinuous peptide	K444, V445, G446							surface glycoprotein [Severe acute respiratory syndrome coronavirus 2]	QHD43416.1	Spike glycoprotein	P0DTC2	Severe acute respiratory syndrome coronavirus 2	Severe acute respiratory syndrome coronavirus 2	2697049													1	1
1338783	Discontinuous peptide	K444, V445, G446, L452, L455, F456, T470, E471, I472, S494							surface glycoprotein [Severe acute respiratory syndrome coronavirus 2]	QHD43416.1	Spike glycoprotein	P0DTC2	Severe acute respiratory syndrome coronavirus 2	Severe acute respiratory syndrome coronavirus 2	2697049													1	1
1338785	Discontinuous peptide	L455, F456, S494, N501							surface glycoprotein [Severe acute respiratory syndrome coronavirus 2]	QHD43416.1	Spike glycoprotein	P0DTC2	Severe acute respiratory syndrome coronavirus 2	Severe acute respiratory syndrome coronavirus 2	2697049													1	1
1338786	Discontinuous peptide	L455, F456, T470, E471, I472							surface glycoprotein [Severe acute respiratory syndrome coronavirus 2]	QHD43416.1	Spike glycoprotein	P0DTC2	Severe acute respiratory syndrome coronavirus 2	Severe acute respiratory syndrome coronavirus 2	2697049													0	0
1397521	Discontinuous peptide	N501							surface glycoprotein [Severe acute respiratory syndrome coronavirus 2]	YP_009724390.1	Spike glycoprotein	P0DTC2	Severe acute respiratory syndrome coronavirus 2	Severe acute respiratory syndrome coronavirus 2	2697049													1	1
1338788	Discontinuous peptide	T470, E471, I472							surface glycoprotein [Severe acute respiratory syndrome coronavirus 2]	QHD43416.1	Spike glycoprotein	P0DTC2	Severe acute respiratory syndrome coronavirus 2	Severe acute respiratory syndrome coronavirus 2	2697049													0	0
1338789	Discontinuous peptide	T470, E471, I472, N501							surface glycoprotein [Severe acute respiratory syndrome coronavirus 2]	QHD43416.1	Spike glycoprotein	P0DTC2	Severe acute respiratory syndrome coronavirus 2	Severe acute respiratory syndrome coronavirus 2	2697049													1	1
1338978	Discontinuous peptide	K147, E484, N501							surface glycoprotein [Severe acute respiratory syndrome coronavirus 2]	QHD43416.1	Spike glycoprotein	P0DTC2	Severe acute respiratory syndrome coronavirus 2	Severe acute respiratory syndrome coronavirus 2	2697049	[PMID:33454512].												1	1
1346701	Discontinuous peptide	N343, A344, T345, R346, S373, W436, N437, N440, L441, S443, K444, V445, N448, N450, R509							surface glycoprotein [Severe acute respiratory syndrome coronavirus 2]	QHD43416.1	Spike glycoprotein	P0DTC2	Severe acute respiratory syndrome coronavirus 2	Severe acute respiratory syndrome coronavirus 2	2697049	The epitope residues were calculated from [PDB: 7LM8] as the antigen residues at 4&Aring; atomic distance from the antibody.												1	1
1346704	Discontinuous peptide	Y369, N370, S371, F377, K378, C379, Y380, G381, V382, S383, P384, T385, R408, P412, G413, Q414, T415, G416, D427, D428, F429							surface glycoprotein [Severe acute respiratory syndrome coronavirus 2]	QHD43416.1	Spike glycoprotein	P0DTC2	Severe acute respiratory syndrome coronavirus 2	Severe acute respiratory syndrome coronavirus 2	2697049	The epitope residues were calculated from [PDB: 7LM8] as the antigen residues at 4&Aring; atomic distance from the antibody.												1	1
1346803	Discontinuous peptide	F140, G142, V143, Y145, H146, N148, N149, W152, E154, F157, A243, L244, H245							surface glycoprotein [Severe acute respiratory syndrome coronavirus 2]	YP_009724390.1	Spike glycoprotein	P0DTC2	Severe acute respiratory syndrome coronavirus 2	Severe acute respiratory syndrome coronavirus 2	2697049	The epitope residues were calculated from [PDB: 7LCN] as the antigen residues at 4&Aring; atomic distance from the antibody.												1	1
1346804	Discontinuous peptide	S12, C15, L18, T19, C136, G142, H146, K147, N149, R246							surface glycoprotein [Severe acute respiratory syndrome coronavirus 2]	YP_009724390.1	Spike glycoprotein	P0DTC2	Severe acute respiratory syndrome coronavirus 2	Severe acute respiratory syndrome coronavirus 2	2697049													1	1
1346805	Discontinuous peptide	V16, N17, F140, G142, V143, Y144, Y145, H146, K147, N148, W152, E154, E156, R158, L244, H245, R246, L249, P251							surface glycoprotein [Severe acute respiratory syndrome coronavirus 2]	YP_009724390.1	Spike glycoprotein	P0DTC2	Severe acute respiratory syndrome coronavirus 2	Severe acute respiratory syndrome coronavirus 2	2697049	The epitope residues were calculated from [PDB: 7LXW] as the antigen residues at 4&Aring; atomic distance from the antibody.												1	1
1346806	Discontinuous peptide	V16, N17, T19, Y144, R246, S247, Y248, T250, P251, G252, D253, S254, S255, S256, G257							surface glycoprotein [Severe acute respiratory syndrome coronavirus 2]	YP_009724390.1	Spike glycoprotein	P0DTC2	Severe acute respiratory syndrome coronavirus 2	Severe acute respiratory syndrome coronavirus 2	2697049	The epitope residues were calculated from [PDB: 7LXX] as the antigen residues at 4&Aring; atomic distance from the antibody.												1	1
1346807	Discontinuous peptide	V16, N17, T20, Y144, Y145, H146, K147, N148, S155, R158, R246, L249, T250, P251, G252, D253							surface glycoprotein [Severe acute respiratory syndrome coronavirus 2]	YP_009724390.1	Spike glycoprotein	P0DTC2	Severe acute respiratory syndrome coronavirus 2	Severe acute respiratory syndrome coronavirus 2	2697049	The epitope residues were calculated from [PDB: 7LY3] as the antigen residues at 4&Aring; atomic distance from the antibody.												1	1
1346808	Discontinuous peptide	Y351, G446, Y449, N450, L452, F456, T470, T478, P479, C480, N481, G482, V483, E484, G485, F486, N487, C488, Y489, F490, P491, L492, Q493, S494							surface glycoprotein [Severe acute respiratory syndrome coronavirus 2]	YP_009724390.1	Spike glycoprotein	P0DTC2	Severe acute respiratory syndrome coronavirus 2	Severe acute respiratory syndrome coronavirus 2	2697049	The epitope residues were calculated from [PDB: 7LJR] as the antigen residues at 4&Aring; atomic distance from the antibody.												1	1
1346809	Discontinuous peptide	Y369, N370, S371, A372, F374, S375, T376, F377, K378, C379, S383, P384, D405, R408, Q409, Q414, T415, G416, N501, V503, G504, Y505							surface glycoprotein [Severe acute respiratory syndrome coronavirus 2]	YP_009724390.1	Spike glycoprotein	P0DTC2	Severe acute respiratory syndrome coronavirus 2	Severe acute respiratory syndrome coronavirus 2	2697049	The epitope residues were calculated from [PDB: 7LD1] as the antigen residues at 4&Aring; atomic distance from the antibody.												1	1
1346810	Discontinuous peptide	Y449, L452, T470, E471, I472, N481, G482, V483, E484, G485, F486, F490, L492, Q493, S494							surface glycoprotein [Severe acute respiratory syndrome coronavirus 2]	YP_009724390.1	Spike glycoprotein	P0DTC2	Severe acute respiratory syndrome coronavirus 2	Severe acute respiratory syndrome coronavirus 2	2697049	The epitope residues were calculated from [PDB: 7LAA] as the antigen residues at 4&Aring; atomic distance from the antibody.												1	1
1393657	Discontinuous peptide	K417, E484, N501							surface glycoprotein [Severe acute respiratory syndrome coronavirus 2]	YP_009724390.1	Spike glycoprotein	P0DTC2	Severe acute respiratory syndrome coronavirus 2	Severe acute respiratory syndrome coronavirus 2	2697049													1	1
1346815	Discontinuous peptide	L452, L455, F456, I472, N481, G482, V483, E484, G485, F486, Y489, F490							surface glycoprotein [Severe acute respiratory syndrome coronavirus 2]	QHD43416.1	Spike glycoprotein	P0DTC2	Severe acute respiratory syndrome coronavirus 2	Severe acute respiratory syndrome coronavirus 2	2697049	The epitope residues were calculated from [PDB: 7BEP, 7ND8] as the antigen residues at 4&Aring; atomic distance from the antibody.												1	1
1346816	Discontinuous peptide	L455, F456, K458, Y473, A475, G476, S477, T478, G485, F486, N487, Y489, Q493							surface glycoprotein [Severe acute respiratory syndrome coronavirus 2]	QHD43416.1	Spike glycoprotein	P0DTC2	Severe acute respiratory syndrome coronavirus 2	Severe acute respiratory syndrome coronavirus 2	2697049	The epitope residues were calculated from [PDB: 7BEN] as the antigen residues at 4&Aring; atomic distance from the antibody.												1	1
1346817	Discontinuous peptide	L455, K458, Y473, A475, G476, S477, T478, G485, F486, N487, C488, Y489, Q493							surface glycoprotein [Severe acute respiratory syndrome coronavirus 2]	QHD43416.1	Spike glycoprotein	P0DTC2	Severe acute respiratory syndrome coronavirus 2	Severe acute respiratory syndrome coronavirus 2	2697049	The epitope residues were calculated from [PDB: 7BEO, 7ND9, 7NDA] as the antigen residues at 4&Aring; atomic distance from the antibody.												1	1
1346818	Discontinuous peptide	N334, L335, P337, G339, E340, N343, A344, T345, K356, R357, S359, C361, N440, L441							surface glycoprotein [Severe acute respiratory syndrome coronavirus 2]	QHD43416.1	Spike glycoprotein	P0DTC2	Severe acute respiratory syndrome coronavirus 2	Severe acute respiratory syndrome coronavirus 2	2697049	The epitope residues were calculated from [PDB: 7BEP] as the antigen residues at 4&Aring; atomic distance from the antibody.												1	1
1346820	Discontinuous peptide	Q14, Y144, Y145, H146, K147, F157, G252, D253							surface glycoprotein [Severe acute respiratory syndrome coronavirus 2]	QHD43416.1	Spike glycoprotein	P0DTC2	Severe acute respiratory syndrome coronavirus 2	Severe acute respiratory syndrome coronavirus 2	2697049	The epitope residues were calculated from [PDB: 7NDC and 7NDD] as the antigen residues at 4&Aring; atomic distance from the antibody.												1	1
1346821	Discontinuous peptide	R403, D405, E406, R408, Q409, T415, G416, K417, D420, Y421, Y453, L455, F456, R457, K458, N460, Y473, Q474, A475, G476, S477, F486, N487, Y489, Y495, G496, Q498, T500, N501, G502, V503, Y505							surface glycoprotein [Severe acute respiratory syndrome coronavirus 2]	QHD43416.1	Spike glycoprotein	P0DTC2	Severe acute respiratory syndrome coronavirus 2	Severe acute respiratory syndrome coronavirus 2	2697049	The epitope residues were calculated from [PDB: 7BEJ, 7BEK, 7ND6] as the antigen residues at 4&Aring; atomic distance from the antibody.												1	1
1346822	Discontinuous peptide	R403, D405, R408, T415, G416, K417, D420, Y421, Y453, L455, R457, K458, N460, Y473, Q474, A475, G476, S477, F486, N487, Y489, Q493, Y495, G496, Q498, T500, N501, G502, Y505							surface glycoprotein [Severe acute respiratory syndrome coronavirus 2]	QHD43416.1	Spike glycoprotein	P0DTC2	Severe acute respiratory syndrome coronavirus 2	Severe acute respiratory syndrome coronavirus 2	2697049	The epitope residues were calculated from [PDB: 7BE and 7ND5] as the antigen residues at 4&Aring; atomic distance from the antibody.												1	1
1346823	Discontinuous peptide	R403, E406, Q409, T415, G416, K417, D420, Y421, Y453, L455, F456, R457, K458, N460, Y473, Q474, A475, G476, F486, N487, Y489, Q493, S494, Y495, G496, Q498, T500, N501, G502, Y505							surface glycoprotein [Severe acute respiratory syndrome coronavirus 2]	QHD43416.1	Spike glycoprotein	P0DTC2	Severe acute respiratory syndrome coronavirus 2	Severe acute respiratory syndrome coronavirus 2	2697049	The epitope residues were calculated from [PDB: 7BEM] as the antigen residues at 4&Aring; atomic distance from the antibody.												1	1
1346824	Discontinuous peptide	R403, K417, Y453, L455, F456, E484, G485, F486, N487, C488, Y489, Q493, N501, G502, Y505							surface glycoprotein [Severe acute respiratory syndrome coronavirus 2]	QHD43416.1	Spike glycoprotein	P0DTC2	Severe acute respiratory syndrome coronavirus 2	Severe acute respiratory syndrome coronavirus 2	2697049	The epitope residues were calculated from [PDB: 7BEL] as the antigen residues at 4&Aring; atomic distance from the antibody.												1	1
1346825	Discontinuous peptide	R403, T415, G416, K417, D420, Y421, Y453, L455, F456, R457, K458, S459, N460, Y473, Q474, A475, G476, S477, F486, N487, Y489, Y495, G496, Q498, T500, N501, G502, Y505							surface glycoprotein [Severe acute respiratory syndrome coronavirus 2]	QHD43416.1	Spike glycoprotein	P0DTC2	Severe acute respiratory syndrome coronavirus 2	Severe acute respiratory syndrome coronavirus 2	2697049	The epitope residues were calculated from [PDB: 7ND3] as the antigen residues at 4&Aring; atomic distance from the antibody.												1	1
1346826	Discontinuous peptide	W353, N354, R355, K356, R357, S359, N360, N394, Y396, P426, D428, K462, P463, F464, E465, R466, I468, E516, L518, H519, A520, T523							surface glycoprotein [Severe acute respiratory syndrome coronavirus 2]	QHD43416.1	Spike glycoprotein	P0DTC2	Severe acute respiratory syndrome coronavirus 2	Severe acute respiratory syndrome coronavirus 2	2697049	The epitope residues were calculated from [PDB: 7BEL] as the antigen residues at 4&Aring; atomic distance from the antibody.												0	0
1346827	Discontinuous peptide	Y449, L455, F456, V483, E484, G485, F486, Y489, F490, L492, Q493, S494							surface glycoprotein [Severe acute respiratory syndrome coronavirus 2]	QHD43416.1	Spike glycoprotein	P0DTC2	Severe acute respiratory syndrome coronavirus 2	Severe acute respiratory syndrome coronavirus 2	2697049	The epitope residues were calculated from [PDB: 7BEH and 7ND7] as the antigen residues at 4&Aring; atomic distance from the antibody.												1	1
1346828	Discontinuous peptide	Y473, A475, T478, F486, N487							surface glycoprotein [Severe acute respiratory syndrome coronavirus 2]	QHD43416.1	Spike glycoprotein	P0DTC2	Severe acute respiratory syndrome coronavirus 2	Severe acute respiratory syndrome coronavirus 2	2697049	The epitope residues were calculated from [PDB: 7NDB] as the antigen residues at 4&Aring; atomic distance from the antibody.												1	1
1346830	Discontinuous peptide on multi chain	A: F342, N343, L368, S371, A372, S373, F374, W436, L441; B: K444, G446, Y449, L452, L455, F456, E484, G485, F486, Y489, F490, L492, Q493, S494					YP_009724390.1				Spike glycoprotein	P0DTC2	Severe acute respiratory syndrome coronavirus 2	Severe acute respiratory syndrome coronavirus 2	2697049	The epitope residues were calculated from [PDB: PDB 7LXY, 7LY2, 7LXZ] as the antigen residues at 4&Aring; atomic distance from the antibody.												1	1
1594765	Discontinuous peptide	D614							surface glycoprotein [Severe acute respiratory syndrome coronavirus 2]	QIC50498.1	Spike glycoprotein	P0DTC2	Severe acute respiratory syndrome coronavirus 2 ITA/INMI1/2020	Severe acute respiratory syndrome coronavirus 2 ITA/INMI1/2020	10002380													1	1
1347685	Discontinuous peptide	G446, N448, Y449, L452, E484, G485, F486, N487, Y489, F490, L492, Q493, S494							surface glycoprotein [Severe acute respiratory syndrome coronavirus 2]	QHD43416.1	Spike glycoprotein	P0DTC2	Severe acute respiratory syndrome coronavirus 2	Severe acute respiratory syndrome coronavirus 2	2697049	The epitope residues were calculated from [PDB: 7CZX] as the antigen residues at 4&Aring; atomic distance from the antibody.												1	1
1347686	Discontinuous peptide	R403, D405, E406, R408, T415, G416, K417, D420, Y421, Y449, L455, F456, R457, K458, N460, Y473, Q474, A475, G476, S477, N487, Y489, Q493, S494, G496, T500, N501, G502, V503, Y505							surface glycoprotein [Severe acute respiratory syndrome coronavirus 2]	QHD43416.1	Spike glycoprotein	P0DTC2	Severe acute respiratory syndrome coronavirus 2	Severe acute respiratory syndrome coronavirus 2	2697049	The epitope residues were calculated from [PDB: 7CZQ] as the antigen residues at 4&Aring; atomic distance from the antibody.												1	1
1347687	Discontinuous peptide	R403, D405, R408, Q409, T415, G416, K417, Y421, Y449, Y453, L455, F456, G485, F486, N487, Y489, Q493, S494, Y495, G496, N501, Y505							surface glycoprotein [Severe acute respiratory syndrome coronavirus 2]	QHD43416.1	Spike glycoprotein	P0DTC2	Severe acute respiratory syndrome coronavirus 2	Severe acute respiratory syndrome coronavirus 2	2697049	The epitope residues were calculated from [PDB: 7CZU, 7CZV] as the antigen residues at 4&Aring; atomic distance from the antibody.												1	1
1347688	Discontinuous peptide	R403, E406, R408, Q409, G416, K417, Y449, Y453, L455, F456, F486, N487, Y489, Q493, S494, Y495, G496, Q498, T500, N501, G502, Y505							surface glycoprotein [Severe acute respiratory syndrome coronavirus 2]	QHD43416.1	Spike glycoprotein	P0DTC2	Severe acute respiratory syndrome coronavirus 2	Severe acute respiratory syndrome coronavirus 2	2697049	The epitope residues were calculated from [PDB: 7CZP] as the antigen residues at 4&Aring; atomic distance from the antibody.												1	1
1347689	Discontinuous peptide	R403, K417, Y449, L452, Y453, L455, F456, E484, G485, F486, C488, Y489, F490, L492, Q493, Y505							surface glycoprotein [Severe acute respiratory syndrome coronavirus 2]	QHD43416.1	Spike glycoprotein	P0DTC2	Severe acute respiratory syndrome coronavirus 2	Severe acute respiratory syndrome coronavirus 2	2697049	The epitope residues were calculated from [PDB: 7CZW, 7D03] as the antigen residues at 4&Aring; atomic distance from the antibody.												1	1
1347690	Discontinuous peptide	R403, R408, Q409, Q414, T415, G416, K417, D420, Y421, G446, Y449, F456, A475, G476, S477, F486, N487, Y489, Q493, S494, G496, Q498, N501, Y505							surface glycoprotein [Severe acute respiratory syndrome coronavirus 2]	QHD43416.1	Spike glycoprotein	P0DTC2	Severe acute respiratory syndrome coronavirus 2	Severe acute respiratory syndrome coronavirus 2	2697049	The epitope residues were calculated from [PDB: 7CZT] as the antigen residues at 4&Aring; atomic distance from the antibody.												1	1
1347691	Discontinuous peptide	R403, T415, G416, K417, D420, Y421, L455, F456, R457, N460, Y473, A475, G476, F486, N487, Y489, Q493, G496, T500, N501, G502, Y505							surface glycoprotein [Severe acute respiratory syndrome coronavirus 2]	QHD43416.1	Spike glycoprotein	P0DTC2	Severe acute respiratory syndrome coronavirus 2	Severe acute respiratory syndrome coronavirus 2	2697049	The epitope residues were calculated from [PDB: 7CZR, 7CZS, 7D00] as the antigen residues at 4&Aring; atomic distance from the antibody.												1	1
1347692	Discontinuous peptide	T415, G416, K417, D420, Y421, L455, F456, R457, K458, N460, Y473, Q474, A475, G476, S477, F486, N487, G496, Y505							surface glycoprotein [Severe acute respiratory syndrome coronavirus 2]	QHD43416.1	Spike glycoprotein	P0DTC2	Severe acute respiratory syndrome coronavirus 2	Severe acute respiratory syndrome coronavirus 2	2697049	The epitope residues were calculated from [PDB: 7D0C] as the antigen residues at 4&Aring; atomic distance from the antibody.												1	1
1347693	Discontinuous peptide	V483, E484, F486, Y489							surface glycoprotein [Severe acute respiratory syndrome coronavirus 2]	QHD43416.1	Spike glycoprotein	P0DTC2	Severe acute respiratory syndrome coronavirus 2	Severe acute respiratory syndrome coronavirus 2	2697049	The epitope residues were calculated from [PDB: 7D0B, 7D0D] as the antigen residues at 4&Aring; atomic distance from the antibody.												1	1
1347694	Discontinuous peptide	Y144							surface glycoprotein [Severe acute respiratory syndrome coronavirus 2]	QHD43416.1	Spike glycoprotein	P0DTC2	Severe acute respiratory syndrome coronavirus 2 Wuhan/Hu-1/2019	Severe acute respiratory syndrome coronavirus 2 Wuhan/Hu-1/2019	10002370													1	1
1347695	Discontinuous peptide	Y421, F456, R457, Y473, A475, G476, S477, E484, G485, F486, N487, Y489, Q493							surface glycoprotein [Severe acute respiratory syndrome coronavirus 2]	QHD43416.1	Spike glycoprotein	P0DTC2	Severe acute respiratory syndrome coronavirus 2	Severe acute respiratory syndrome coronavirus 2	2697049	The epitope residues were calculated from [PDB: 7CZY, 7CZZ] as the antigen residues at 4&Aring; atomic distance from the antibody.												1	1
1642873	Discontinuous peptide	K417, E484							Spike glycoprotein	P0DTC2.1	Spike glycoprotein	P0DTC2	Severe acute respiratory syndrome coronavirus 2	Severe acute respiratory syndrome coronavirus 2	2697049													1	1
1642877	Discontinuous peptide	K417, N501							Spike glycoprotein	P0DTC2.1	Spike glycoprotein	P0DTC2	Severe acute respiratory syndrome coronavirus 2	Severe acute respiratory syndrome coronavirus 2	2697049													1	1
1347903	Discontinuous peptide	L18, D80, L242, A243, L244, R246							surface glycoprotein [Severe acute respiratory syndrome coronavirus 2]	QHD43416.1	Spike glycoprotein	P0DTC2	Severe acute respiratory syndrome coronavirus 2	Severe acute respiratory syndrome coronavirus 2	2697049													0	0
1347904	Discontinuous peptide	L18, Y144, L242, A243, L244, N501							surface glycoprotein [Severe acute respiratory syndrome coronavirus 2]	QHD43416.1	Spike glycoprotein	P0DTC2	Severe acute respiratory syndrome coronavirus 2	Severe acute respiratory syndrome coronavirus 2	2697049													1	1
1347905	Discontinuous peptide	L18, Y144, L242, A243, L244, R246, E484, N501, A701, T716							surface glycoprotein [Severe acute respiratory syndrome coronavirus 2]	QHD43416.1	Spike glycoprotein	P0DTC2	Severe acute respiratory syndrome coronavirus 2	Severe acute respiratory syndrome coronavirus 2	2697049													1	1
1347906	Discontinuous peptide	L242, A243, L244, E484							surface glycoprotein [Severe acute respiratory syndrome coronavirus 2]	QHD43416.1	Spike glycoprotein	P0DTC2	Severe acute respiratory syndrome coronavirus 2	Severe acute respiratory syndrome coronavirus 2	2697049													1	1
1347907	Discontinuous peptide	S982							surface glycoprotein [Severe acute respiratory syndrome coronavirus 2]	QHD43416.1	Spike glycoprotein	P0DTC2	Severe acute respiratory syndrome coronavirus 2	Severe acute respiratory syndrome coronavirus 2	2697049													0	0
1347908	Discontinuous peptide	Y144, L242, A243, L244, R246							surface glycoprotein [Severe acute respiratory syndrome coronavirus 2]	QHD43416.1	Spike glycoprotein	P0DTC2	Severe acute respiratory syndrome coronavirus 2	Severe acute respiratory syndrome coronavirus 2	2697049													1	1
1347909	Discontinuous peptide	Y144, L242, A243, L244, R246, A570							surface glycoprotein [Severe acute respiratory syndrome coronavirus 2]	QHD43416.1	Spike glycoprotein	P0DTC2	Severe acute respiratory syndrome coronavirus 2	Severe acute respiratory syndrome coronavirus 2	2697049													1	1
1347910	Discontinuous peptide	Q14, C15, V16, N17, T19, G142, V143, Y144, K147, E156, R158, L244, H245, R246, S247, Y248, L249, T250, P251, G252, S256							surface glycoprotein [Severe acute respiratory syndrome coronavirus 2]	QHO60594.1	Spike glycoprotein	P0DTC2	Severe acute respiratory syndrome coronavirus 2	Severe acute respiratory syndrome coronavirus 2	2697049	The epitope residues were calculated from [PDB: 7L2E] as the antigen residues at 4&Aring; atomic distance from the antibody.												1	1
1347911	Discontinuous peptide	Q14, C15, Y144, H146, K147, E154, E156, R158, R246, Y248, L249, T250, P251, D253, S254							surface glycoprotein [Severe acute respiratory syndrome coronavirus 2]	QHO60594.1	Spike glycoprotein	P0DTC2	Severe acute respiratory syndrome coronavirus 2	Severe acute respiratory syndrome coronavirus 2	2697049	The epitope residues were calculated from [PDB: 7L2F] as the antigen residues at 4&Aring; atomic distance from the antibody.												1	1
1347912	Discontinuous peptide	Q14, N17, L18, T76, K77, V143							surface glycoprotein [Severe acute respiratory syndrome coronavirus 2]	QHO60594.1	Spike glycoprotein	P0DTC2	Severe acute respiratory syndrome coronavirus 2	Severe acute respiratory syndrome coronavirus 2	2697049	The epitope residues were calculated from [PDB: 7LQW] as the antigen residues at 4&Aring; atomic distance from the antibody.												1	1
1347913	Discontinuous peptide	Q14, Y144, H146, K147, N148, N149, W152, M153, E154, E156, F157, R158, R246, Y248, L249, P251, G252, D253							surface glycoprotein [Severe acute respiratory syndrome coronavirus 2]	QHO60594.1	Spike glycoprotein	P0DTC2	Severe acute respiratory syndrome coronavirus 2	Severe acute respiratory syndrome coronavirus 2	2697049	The epitope residues were calculated from [PDB: 7LQV] as the antigen residues at 4&Aring; atomic distance from the antibody.												1	1
1347914	Discontinuous peptide	Y144, Y145, H146, K147, K150, W152, H245, R246, Y248, L249, T250, P251, G252, S254, S255, S256							surface glycoprotein [Severe acute respiratory syndrome coronavirus 2]	QHO60594.1	Spike glycoprotein	P0DTC2	Severe acute respiratory syndrome coronavirus 2	Severe acute respiratory syndrome coronavirus 2	2697049	The epitope residues were calculated from [PDB: 7L2D] as the antigen residues at 4&Aring; atomic distance from the antibody.												1	1
1347915	Discontinuous peptide	Y144, Y145, H146, K147, N148, K150, R246, S247, Y248, L249, T250, P251, G252, D253, S254							surface glycoprotein [Severe acute respiratory syndrome coronavirus 2]	QHO60594.1	Spike glycoprotein	P0DTC2	Severe acute respiratory syndrome coronavirus 2	Severe acute respiratory syndrome coronavirus 2	2697049	The epitope residues were calculated from [PDB: 7L2C] as the antigen residues at 4&Aring; atomic distance from the antibody.												1	1
1391788	Discontinuous peptide	G446, Y449, L452, T478, V483, E484, G485, F486, N487, Y489, F490, L492, Q493, S494, G496, Q498							surface glycoprotein [Severe acute respiratory syndrome coronavirus 2]	YP_009724390.1	Spike glycoprotein	P0DTC2	Severe acute respiratory syndrome coronavirus 2	Severe acute respiratory syndrome coronavirus 2	2697049	The epitope residues were calculated from [PDB: 7L5B] as the antigen residues at 4&Aring; atomic distance from the antibody.												1	1
1391789	Discontinuous peptide	R403, D405, R408, T415, G416, K417, D420, Y421, L455, F456, R457, K458, N460, Y473, Q474, A475, G476, S477, F486, N487, Y489, Q493, T500, N501, G502, Y505							surface glycoprotein [Severe acute respiratory syndrome coronavirus 2]	YP_009724390.1	Spike glycoprotein	P0DTC2	Severe acute respiratory syndrome coronavirus 2	Severe acute respiratory syndrome coronavirus 2	2697049	The epitope residues were calculated from [PDB: 7NX6] as the antigen residues at 4&Aring; atomic distance from the antibody. Structures [PDB: 7NX9, 7NXA, 7NXB] contained mutation N501Y which was a contact residue in all structures: N501 in [PDB: 7NX6, 7NX7, 7NX8] and Y501 in [PDB: 7NX9, 7NXA, 7NXB]. [PDB: 7NX7,7NX8] had mutation K417N and [PDB: 7NX8, 7NXB] had mutation K417T, which are contact re…												1	1
1391791	Discontinuous peptide	W353, R355, R357, Y396, P426, D427, D428, F429, K462, P463, F464, R466, S514, E516, L518, H519, A520, P521							surface glycoprotein [Severe acute respiratory syndrome coronavirus 2]	YP_009724390.1	Spike glycoprotein	P0DTC2	Severe acute respiratory syndrome coronavirus 2	Severe acute respiratory syndrome coronavirus 2	2697049	The epitope residues were calculated from [PDB: 7M7W] as the antigen residues at 4&Aring; atomic distance from the antibody.												0	0
1391792	Discontinuous peptide	Y144, W152, R246, Y248							surface glycoprotein [Severe acute respiratory syndrome coronavirus 2]	YP_009724390.1	Spike glycoprotein	P0DTC2	Severe acute respiratory syndrome coronavirus 2	Severe acute respiratory syndrome coronavirus 2	2697049													1	1
1391793	Discontinuous peptide	Y144, Y145, H146, K147, R246, S247, Y248, L249, T250, P251, G252, S255							surface glycoprotein [Severe acute respiratory syndrome coronavirus 2]	YP_009724390.1	Spike glycoprotein	P0DTC2	Severe acute respiratory syndrome coronavirus 2	Severe acute respiratory syndrome coronavirus 2	2697049	The epitope residues were calculated from [PDB: 7M8J] as the antigen residues at 4&Aring; atomic distance from the antibody.												1	1
1391794	Discontinuous peptide	Y145, K147, W152, Y248							surface glycoprotein [Severe acute respiratory syndrome coronavirus 2]	YP_009724390.1	Spike glycoprotein	P0DTC2	Severe acute respiratory syndrome coronavirus 2	Severe acute respiratory syndrome coronavirus 2	2697049													1	1
1391795	Discontinuous peptide	Y369, N370, S371, A372, F374, S375, T376, F377, K378, C379, Y380, V382, S383, P384, T385, G404, D405, R408, T500, N501, G502, V503, G504, Q506							surface glycoprotein [Severe acute respiratory syndrome coronavirus 2]	YP_009724390.1	Spike glycoprotein	P0DTC2	Severe acute respiratory syndrome coronavirus 2	Severe acute respiratory syndrome coronavirus 2	2697049	The epitope residues were calculated from [PDB: 7M7W] as the antigen residues at 4&Aring; atomic distance from the antibody.												1	1
1391796	Discontinuous peptide	Y449, L455, F456, V483, E484, G485, F486, Y489, F490, Q493, S494							surface glycoprotein [Severe acute respiratory syndrome coronavirus 2]	YP_009724390.1	Spike glycoprotein	P0DTC2	Severe acute respiratory syndrome coronavirus 2	Severe acute respiratory syndrome coronavirus 2	2697049	The epitope residues were calculated from [PDB: 7L56] as the antigen residues at 4&Aring; atomic distance from the antibody.												1	1
1391797	Discontinuous peptide	K444, G447							surface glycoprotein [Severe acute respiratory syndrome coronavirus 2]	QHD43416.1	Spike glycoprotein	P0DTC2	Severe acute respiratory syndrome coronavirus 2	Severe acute respiratory syndrome coronavirus 2	2697049													0	0
1391798	Discontinuous peptide	N487							surface glycoprotein [Severe acute respiratory syndrome coronavirus 2]	QHD43416.1	Spike glycoprotein	P0DTC2	Severe acute respiratory syndrome coronavirus 2	Severe acute respiratory syndrome coronavirus 2	2697049													0	0
1391998	Discontinuous peptide	K304, S371, N388							Spike glycoprotein	P0DTC2.1	Spike glycoprotein	P0DTC2	Severe acute respiratory syndrome coronavirus 2	Severe acute respiratory syndrome coronavirus 2	2697049													1	1
1392001	Discontinuous peptide	R403, D405, A419, G502, G504, Y505, R509							Spike glycoprotein	P0DTC2.1	Spike glycoprotein	P0DTC2	Severe acute respiratory syndrome coronavirus 2	Severe acute respiratory syndrome coronavirus 2	2697049													1	1
1392002	Discontinuous peptide	S71, K97, S98, T124, Y145, H146, K147, K150, S151, W152, E180, G181, K182, Q183, N185, V213, H245, S247, Y248, L249, T259, A260, A262							Spike glycoprotein	P0DTC2.1	Spike glycoprotein	P0DTC2	Severe acute respiratory syndrome coronavirus 2	Severe acute respiratory syndrome coronavirus 2	2697049	The epitope residues were calculated from [PDB: 7NTC] as the antigen residues at 4&Aring; atomic distance from the antibody.												1	1
1392550	Discontinuous peptide	F374, S375, T376, F377, K378, C379, Y380, G381, V382, S383, P384, T385, K386, R408, N437, V503, G504, Y508							surface glycoprotein [Severe acute respiratory syndrome coronavirus 2]	YP_009724390.1	Spike glycoprotein	P0DTC2	Severe acute respiratory syndrome coronavirus 2	Severe acute respiratory syndrome coronavirus 2	2697049	The epitope residues were calculated from [PDB: 7M3I] as the antigen residues at 4&Aring; atomic distance from the antibody.												1	1
1392552	Discontinuous peptide	R346, Y351, K444, Y449, N450, L452, T470, I472, N481, G482, V483, E484, F490, L492, S494							surface glycoprotein [Severe acute respiratory syndrome coronavirus 2]	YP_009724390.1	Spike glycoprotein	P0DTC2	Severe acute respiratory syndrome coronavirus 2	Severe acute respiratory syndrome coronavirus 2	2697049	The epitope residues were calculated from [PDB: 7MF1] as the antigen residues at 4&Aring; atomic distance from the antibody.												1	1
1392553	Discontinuous peptide	R403, T415, G416, K417, D420, Y421, Y453, L455, F456, R457, K458, N460, Y473, Q474, A475, G476, S477, F486, N487, Y489, Q493, S494, Y495, G496, Q498, T500, N501, G502, Y505							surface glycoprotein [Severe acute respiratory syndrome coronavirus 2]	YP_009724390.1	Spike glycoprotein	P0DTC2	Severe acute respiratory syndrome coronavirus 2	Severe acute respiratory syndrome coronavirus 2	2697049	The epitope residues were calculated from [PDB: 7CJF] as the antigen residues at 4&Aring; atomic distance from the antibody.												1	1
1392577	Discontinuous peptide	N439, N440, S443, K444, V445, G446, G447, Y449, N450, S494, P499, T500, Q506							surface glycoprotein [Severe acute respiratory syndrome coronavirus 2]	QHO60594.1	Spike glycoprotein	P0DTC2	Severe acute respiratory syndrome coronavirus 2 USA-WA1/2020	Severe acute respiratory syndrome coronavirus 2 USA-WA1/2020	10002329	The epitope residues were calculated from [PDB: 7M6G] as the antigen residues at 4&Aring; atomic distance from the antibody.												1	1
1392578	Discontinuous peptide	R403, T415, G416, K417, D420, Y421, Y453, L455, F456, R457, K458, N460, Y473, Q474, A475, G476, S477, F486, N487, Y489, Q493, Y505							surface glycoprotein [Severe acute respiratory syndrome coronavirus 2]	QHO60594.1	Spike glycoprotein	P0DTC2	Severe acute respiratory syndrome coronavirus 2 USA-WA1/2020	Severe acute respiratory syndrome coronavirus 2 USA-WA1/2020	10002329	The epitope residues were calculated from [PDB: 7M6D] as the antigen residues at 4&Aring; atomic distance from the antibody.												1	1
1392579	Discontinuous peptide	T415, Y421, A475, G476, N487, S494, G502							surface glycoprotein [Severe acute respiratory syndrome coronavirus 2]	QHO60594.1	Spike glycoprotein	P0DTC2	Severe acute respiratory syndrome coronavirus 2 USA-WA1/2020	Severe acute respiratory syndrome coronavirus 2 USA-WA1/2020	10002329	The epitope residues were calculated from [PDB: 7M6F] as the antigen residues at 4&Aring; atomic distance from the antibody.												0	0
1392580	Discontinuous peptide	Y369, N370, F374, S375, T376, F377, K378, C379, Y380, G381, V382, S383, P384, T385, K386, F429, T430, F515, L517							surface glycoprotein [Severe acute respiratory syndrome coronavirus 2]	QHO60594.1	Spike glycoprotein	P0DTC2	Severe acute respiratory syndrome coronavirus 2 USA-WA1/2020	Severe acute respiratory syndrome coronavirus 2 USA-WA1/2020	10002329	The epitope residues were calculated from [PDB: 7M6D] as the antigen residues at 4&Aring; atomic distance from the antibody.												1	1
1392584	Discontinuous peptide	L56, T57, H59, K65, F66, P67, Q70, L159, Q160, L161, P162, Q163, G164, T165, T166, L167, P168, K169, G170, F171							Nucleoprotein	P0DTC9.1	Nucleoprotein	P0DTC9	Severe acute respiratory syndrome coronavirus 2	Severe acute respiratory syndrome coronavirus 2	2697049	The epitope residues were calculated from [PDB: 7CR5] as the antigen residues at 4&Aring; atomic distance from the antibody.												0	0
1392587	Discontinuous peptide on multi chain	A: G339, F342, N343, T345, R346, V367, L368, S371, S373, F374, W436, N437, S438, N440, L441, K444, N448, N450; E: Y449, Q498					QHO60594.1				Spike glycoprotein	P0DTC2	Severe acute respiratory syndrome coronavirus 2 USA-WA1/2020	Severe acute respiratory syndrome coronavirus 2 USA-WA1/2020	10002329	The epitope residues were calculated from [PDB: 7M6E] as the antigen residues at 4&Aring; atomic distance from the antibody.												1	1
1392588	Discontinuous peptide on multi chain	B: A372, S375, T376, R408, V503, G504, Y508; C: Y351, Y449, L452, T470, I472, Y473, G482, V483, E484, G485, F486, Y489, F490, L492, Q493, S494					QHO60594.1				Spike glycoprotein	P0DTC2	Severe acute respiratory syndrome coronavirus 2 USA-WA1/2020	Severe acute respiratory syndrome coronavirus 2 USA-WA1/2020	10002329	The epitope residues were calculated from [PDB: 7M6I] as the antigen residues at 4&Aring; atomic distance from the antibody.												1	1
1392589	Discontinuous peptide on multi chain	B: Y449, L452, L455, F456, A475, G482, E484, G485, F486, Y489, F490, L492, Q493, S494; C: S375, T376, K378, R408, Q409, Q414, K417, V503, G504, Y505, Q506, Y508					QHO60594.1				Spike glycoprotein	P0DTC2	Severe acute respiratory syndrome coronavirus 2 USA-WA1/2020	Severe acute respiratory syndrome coronavirus 2 USA-WA1/2020	10002329	The epitope residues were calculated from [PDB: 7M6H] as the antigen residues at 4&Aring; atomic distance from the antibody.												1	1
1642870	Discontinuous peptide	E484, N501							Spike glycoprotein	P0DTC2.1	Spike glycoprotein	P0DTC2	Severe acute respiratory syndrome coronavirus 2	Severe acute respiratory syndrome coronavirus 2	2697049													1	1
1397231	Discontinuous peptide	R346, N439, N440, S443, K444, V445, G446, G447, N450, Q498, P499, T500, N501, G502, Q506							surface glycoprotein [Severe acute respiratory syndrome coronavirus 2]	QHD43416.1	Spike glycoprotein	P0DTC2	Severe acute respiratory syndrome coronavirus 2 Wuhan/IVDC-HB-01/2019	Severe acute respiratory syndrome coronavirus 2 Wuhan/IVDC-HB-01/2019	10002321	The epitope residues were calculated from [PDB: 7MMO] as the antigen residues at 4&Aring; atomic distance from the antibody.												1	1
1397232	Discontinuous peptide	D405, K417, L455, F456, A475, G476, S477, E484, G485, F486, N487, Y489							Spike glycoprotein	P0DTC2.1	Spike glycoprotein	P0DTC2	Severe acute respiratory syndrome coronavirus 2	Severe acute respiratory syndrome coronavirus 2	2697049	The epitope residues were calculated from [PDB: 7KZB] as the antigen residues at 4&Aring; atomic distance from the antibody.												1	1
1397518	Discontinuous peptide	F456, Y473, A475, G476, S477, T478, V483, E484, G485, F486, N487, C488, Y489							surface glycoprotein [Severe acute respiratory syndrome coronavirus 2]	YP_009724390.1	Spike glycoprotein	P0DTC2	Severe acute respiratory syndrome coronavirus 2	Severe acute respiratory syndrome coronavirus 2	2697049	The epitope residues were calculated from [PDB: 7E7Y] as the antigen residues at 4&Aring; atomic distance from the antibody.												1	1
1642879	Discontinuous peptide	L242, A243, L244							Spike glycoprotein	P0DTC2.1	Spike glycoprotein	P0DTC2	Severe acute respiratory syndrome coronavirus 2	Severe acute respiratory syndrome coronavirus 2	2697049													0	0
1397523	Discontinuous peptide	R346, K444, Y449, N450, L452, I472, N481, G482, V483, E484, F490, L492							surface glycoprotein [Severe acute respiratory syndrome coronavirus 2]	YP_009724390.1	Spike glycoprotein	P0DTC2	Severe acute respiratory syndrome coronavirus 2	Severe acute respiratory syndrome coronavirus 2	2697049	The epitope residues were calculated from [PDB: 7E8C and 7E8F] as the antigen residues at 4&Aring; atomic distance from the antibody.												1	1
1397524	Discontinuous peptide	R403, D405, T415, G416, K417, D420, Y421, L455, F456, R457, K458, N460, Y473, A475, G476, S477, E484, F486, N487, Y489, F490, Q493, S494, G496, Q498, N501, G502, Y505							surface glycoprotein [Severe acute respiratory syndrome coronavirus 2]	YP_009724390.1	Spike glycoprotein	P0DTC2	Severe acute respiratory syndrome coronavirus 2	Severe acute respiratory syndrome coronavirus 2	2697049	The epitope residues were calculated from [PDB: 7E86] as the antigen residues at 4&Aring; atomic distance from the antibody.												1	1
1397525	Discontinuous peptide	R403, D405, T415, G416, K417, D420, Y421, Y453, L455, F456, R457, K458,S459, N460, Y473, A475, G476, S477, F486, N487, Y489, Q493, G496, Q498, T500, N501, G502, Y505							surface glycoprotein [Severe acute respiratory syndrome coronavirus 2]	YP_009724390.1	Spike glycoprotein	P0DTC2	Severe acute respiratory syndrome coronavirus 2	Severe acute respiratory syndrome coronavirus 2	2697049	The epitope residues were calculated from [PDB: 7E8C and 7E8F] as the antigen residues at 4&Aring; atomic distance from the antibody.												1	1
1397526	Discontinuous peptide	R403, T415, K417, D420, Y421, L455, R457, K458, N460, Y473, Q474, A475, G476, S477, T478, F486, N487, Y489, N501, G502, Y505							surface glycoprotein [Severe acute respiratory syndrome coronavirus 2]	YP_009724390.1	Spike glycoprotein	P0DTC2	Severe acute respiratory syndrome coronavirus 2	Severe acute respiratory syndrome coronavirus 2	2697049	The epitope residues were calculated from [PDB: 7E88] as the antigen residues at 4&Aring; atomic distance from the antibody.												1	1
1398136	Discontinuous peptide	A372, K378							surface glycoprotein [Severe acute respiratory syndrome coronavirus 2]	YP_009724390.1	Spike glycoprotein	P0DTC2	Severe acute respiratory syndrome coronavirus 2	Severe acute respiratory syndrome coronavirus 2	2697049													0	0
1852155	Discontinuous peptide	Q493							Spike glycoprotein	P0DTC2.1	Spike glycoprotein	P0DTC2	Severe acute respiratory syndrome coronavirus 2	Severe acute respiratory syndrome coronavirus 2	2697049													1	1
1539320	Discontinuous peptide	K417, L455, F456, Y473, Q474, A475, G476, S477, T478, C480, E484, G485, F486, C488, Y489, Q493							surface glycoprotein [Severe acute respiratory syndrome coronavirus 2]	QHO60594.1	Spike glycoprotein	P0DTC2	Severe acute respiratory syndrome coronavirus 2 USA-WA1/2020	Severe acute respiratory syndrome coronavirus 2 USA-WA1/2020	10002329	The epitope residues were calculated from [PDB: 7MM0 and 7MLZ] as the antigen residues at 4&Aring; atomic distance from the antibody.												1	1
1539321	Discontinuous peptide	K444, G446, S494, N450							surface glycoprotein [Severe acute respiratory syndrome coronavirus 2]	QHO60594.1	Spike glycoprotein	P0DTC2	Severe acute respiratory syndrome coronavirus 2 USA-WA1/2020	Severe acute respiratory syndrome coronavirus 2 USA-WA1/2020	10002329													1	1
1539322	Discontinuous peptide	L455, F456, A475, G476, S477, T478, E484, F486, N487, Y489							surface glycoprotein [Severe acute respiratory syndrome coronavirus 2]	QHO60594.1	Spike glycoprotein	P0DTC2	Severe acute respiratory syndrome coronavirus 2 USA-WA1/2020	Severe acute respiratory syndrome coronavirus 2 USA-WA1/2020	10002329	The epitope residues were calculated from [PDB: 7LRT and 7LRS] as the antigen residues at 4&Aring; atomic distance from the antibody.												1	1
1539325	Discontinuous peptide	E340, V341, N343, T345, R346, F347, A348, Y351, N354, K356, L441, Y449, N450, R466, I468, T470, N481, G482, V483, E484, F490							Spike glycoprotein	P0DTC2.1	Spike glycoprotein	P0DTC2	Severe acute respiratory syndrome coronavirus 2	Severe acute respiratory syndrome coronavirus 2	2697049	The epitope residues were calculated from [PDB: 7N64] as the antigen residues at 4&Aring; atomic distance from the antibody.												1	1
1539326	Discontinuous peptide	Q14, Y144, Y145, H146, K147, M153, F157, R158, R246, Y248, L249, T250, P251, G252, D253, S254							Spike glycoprotein	P0DTC2.1	Spike glycoprotein	P0DTC2	Severe acute respiratory syndrome coronavirus 2	Severe acute respiratory syndrome coronavirus 2	2697049	The epitope residues were calculated from [PDB: 7N62] as the antigen residues at 4&Aring; atomic distance from the antibody.												1	1
1556269	Discontinuous peptide	Y351, K444, G446, Y449, N450, L452, T470, V483, E484, G485, F486, N487, C488, Y489, F490, L492, Q493, S494, Q498							surface glycoprotein [Severe acute respiratory syndrome coronavirus 2]	QHD43416.1	Spike glycoprotein	P0DTC2	Severe acute respiratory syndrome coronavirus 2	Severe acute respiratory syndrome coronavirus 2	2697049	The epitope residues were calculated from [PDB: 7DK0] as the antigen residues at 4&Aring; atomic distance from the antibody.												1	1
1556270	Discontinuous peptide	Y369, A372, S373, F374, S375, T376, F377, K378, C379, P384, R408, N437, G502, V503, Q506, Y508							surface glycoprotein [Severe acute respiratory syndrome coronavirus 2]	QHD43416.1	Spike glycoprotein	P0DTC2	Severe acute respiratory syndrome coronavirus 2	Severe acute respiratory syndrome coronavirus 2	2697049	The epitope residues were calculated from [PDB: 7DPM] as the antigen residues at 4&Aring; atomic distance from the antibody.												1	1
1594752	Discontinuous peptide	I472, E484, F486, N487, Y489, F490							surface glycoprotein [Severe acute respiratory syndrome coronavirus 2]	YP_009724390.1	Spike glycoprotein	P0DTC2	Severe acute respiratory syndrome coronavirus 2	Severe acute respiratory syndrome coronavirus 2	2697049	.												1	1
1594753	Discontinuous peptide	K417, L455, F456, Y473, I472, A475, E484, F486, N487, Y489, Q493							surface glycoprotein [Severe acute respiratory syndrome coronavirus 2]	YP_009724390.1	Spike glycoprotein	P0DTC2	Severe acute respiratory syndrome coronavirus 2	Severe acute respiratory syndrome coronavirus 2	2697049	.												1	1
1594754	Discontinuous peptide	K417, Y449, L455, F456, Y489, G496, Q498, T500, N501							surface glycoprotein [Severe acute respiratory syndrome coronavirus 2]	YP_009724390.1	Spike glycoprotein	P0DTC2	Severe acute respiratory syndrome coronavirus 2	Severe acute respiratory syndrome coronavirus 2	2697049	.												1	1
1594755	Discontinuous peptide	L455, Y473, A475, G476, S477, T478, E484, G485, F486, N487, C488, Y489, Q493							surface glycoprotein [Severe acute respiratory syndrome coronavirus 2]	YP_009724390.1	Spike glycoprotein	P0DTC2	Severe acute respiratory syndrome coronavirus 2	Severe acute respiratory syndrome coronavirus 2	2697049	The epitope residues were calculated from [PDB: 7R6X] as the antigen residues at 4&Aring; atomic distance from the antibody.												1	1
1862954	Discontinuous peptide	N331, I332, T333, N334, L335, P337, G339, E340, N343, A344, T345, R346, K356, R357, S359, C361, L441							surface glycoprotein [Severe acute respiratory syndrome coronavirus 2]	QHD43416.1	Spike glycoprotein	P0DTC2	Severe acute respiratory syndrome coronavirus 2	Severe acute respiratory syndrome coronavirus 2	2697049	The epitope was determined in the cited reference: [PMID:34261126].												1	1
1594757	Discontinuous peptide	S443, V445, G446, P499							surface glycoprotein [Severe acute respiratory syndrome coronavirus 2]	YP_009724390.1	Spike glycoprotein	P0DTC2	Severe acute respiratory syndrome coronavirus 2	Severe acute respiratory syndrome coronavirus 2	2697049	.												1	1
1594758	Discontinuous peptide	Y351, Y449, L452, F456, T470, G482, E484, G485, F486, Y489, F490, L492, S494							surface glycoprotein [Severe acute respiratory syndrome coronavirus 2]	YP_009724390.1	Spike glycoprotein	P0DTC2	Severe acute respiratory syndrome coronavirus 2	Severe acute respiratory syndrome coronavirus 2	2697049	The epitope residues were calculated from [PDB: 7R7N] as the antigen residues at 4&Aring; atomic distance from the antibody.												1	1
1594759	Discontinuous peptide	Y369, S371, A372, F374, S375, T376, F377, K378, C379, V382, S383, P384, R403, G404, D405, R408, N501, G502, V503, G504, Y505, Y508							surface glycoprotein [Severe acute respiratory syndrome coronavirus 2]	YP_009724390.1	Spike glycoprotein	P0DTC2	Severe acute respiratory syndrome coronavirus 2	Severe acute respiratory syndrome coronavirus 2	2697049	The epitope residues were calculated from [PDB: 7R6W] as the antigen residues at 4&Aring; atomic distance from the antibody.												1	1
1594760	Discontinuous peptide	Y369, S375, F377, K378, C379, Y380, G381, V382, S383, P384, T385, K386, L390, C391, F392, P412, D427, D428, F429, L517, K528							surface glycoprotein [Severe acute respiratory syndrome coronavirus 2]	YP_009724390.1	Spike glycoprotein	P0DTC2	Severe acute respiratory syndrome coronavirus 2	Severe acute respiratory syndrome coronavirus 2	2697049	The epitope residues were calculated from [PDB: 7R6X] as the antigen residues at 4&Aring; atomic distance from the antibody.												1	1
1594761	Discontinuous peptide	Y449, F456, I472, Y473, N481, V483, E484, G485, F486, F490							surface glycoprotein [Severe acute respiratory syndrome coronavirus 2]	YP_009724390.1	Spike glycoprotein	P0DTC2	Severe acute respiratory syndrome coronavirus 2	Severe acute respiratory syndrome coronavirus 2	2697049	.												1	1
1594762	Discontinuous peptide	Y449, N450, L452, E484, F490, S494							surface glycoprotein [Severe acute respiratory syndrome coronavirus 2]	YP_009724390.1	Spike glycoprotein	P0DTC2	Severe acute respiratory syndrome coronavirus 2	Severe acute respiratory syndrome coronavirus 2	2697049	.												1	1
1594767	Discontinuous peptide	F140							surface glycoprotein [Severe acute respiratory syndrome coronavirus 2]	QIC50498.1	Spike glycoprotein	P0DTC2	Severe acute respiratory syndrome coronavirus 2 ITA/INMI1/2020	Severe acute respiratory syndrome coronavirus 2 ITA/INMI1/2020	10002380													0	0
1594768	Discontinuous peptide	F140, E484							surface glycoprotein [Severe acute respiratory syndrome coronavirus 2]	QIC50498.1	Spike glycoprotein	P0DTC2	Severe acute respiratory syndrome coronavirus 2 ITA/INMI1/2020	Severe acute respiratory syndrome coronavirus 2 ITA/INMI1/2020	10002380													1	1
1596865	Discontinuous peptide	S13, W152							surface glycoprotein [Severe acute respiratory syndrome coronavirus 2]	YP_009724390.1	Spike glycoprotein	P0DTC2	Severe acute respiratory syndrome coronavirus 2	Severe acute respiratory syndrome coronavirus 2	2697049													0	0
1596867	Discontinuous peptide	E484, S494, N501							Spike glycoprotein	P0DTC2.1	Spike glycoprotein	P0DTC2	Severe acute respiratory syndrome coronavirus 2	Severe acute respiratory syndrome coronavirus 2	2697049													1	1
1597448	Discontinuous peptide	A475							Spike glycoprotein	P0DTC2.1	Spike glycoprotein	P0DTC2	Severe acute respiratory syndrome coronavirus 2	Severe acute respiratory syndrome coronavirus 2	2697049													0	0
1597449	Discontinuous peptide	A831							Spike glycoprotein	P0DTC2.1	Spike glycoprotein	P0DTC2	Severe acute respiratory syndrome coronavirus 2	Severe acute respiratory syndrome coronavirus 2	2697049													0	0
1597450	Discontinuous peptide	D614, I472							Spike glycoprotein	P0DTC2.1	Spike glycoprotein	P0DTC2	Severe acute respiratory syndrome coronavirus 2	Severe acute respiratory syndrome coronavirus 2	2697049													1	1
1597453	Discontinuous peptide	H519							Spike glycoprotein	P0DTC2.1	Spike glycoprotein	P0DTC2	Severe acute respiratory syndrome coronavirus 2	Severe acute respiratory syndrome coronavirus 2	2697049													0	0
1597455	Discontinuous peptide	N234							Spike glycoprotein	P0DTC2.1	Spike glycoprotein	P0DTC2	Severe acute respiratory syndrome coronavirus 2	Severe acute respiratory syndrome coronavirus 2	2697049													0	0
1597456	Discontinuous peptide	N439							Spike glycoprotein	P0DTC2.1	Spike glycoprotein	P0DTC2	Severe acute respiratory syndrome coronavirus 2	Severe acute respiratory syndrome coronavirus 2	2697049													0	0
1597459	Discontinuous peptide	V483							Spike glycoprotein	P0DTC2.1	Spike glycoprotein	P0DTC2	Severe acute respiratory syndrome coronavirus 2	Severe acute respiratory syndrome coronavirus 2	2697049													0	0
1597461	Discontinuous peptide	E337, T342, R343, F344, A345, Y348, N351, K353, Y446, N447, L449, R463, I465, T467, V480, F487							surface glycoprotein [Severe acute respiratory syndrome coronavirus 2]	QWW93436.1	Spike glycoprotein	P0DTC2	Severe acute respiratory syndrome coronavirus 2 DEU/Vero E6 cells/2021	Severe acute respiratory syndrome coronavirus 2 DEU/Vero E6 cells/2021	10002442	The epitope residues were calculated from [PDB: 7EY0] as the antigen residues at 4&Aring; atomic distance from the antibody.												0	0
1597462	Discontinuous peptide	E337, T342, R343, Y348, N351, R352, K353, R354, Y446, N447, L449, R463, I465, S466, T467, E468, G479, F487, L489							surface glycoprotein [Severe acute respiratory syndrome coronavirus 2]	QWW93436.1	Spike glycoprotein	P0DTC2	Severe acute respiratory syndrome coronavirus 2 DEU/Vero E6 cells/2021	Severe acute respiratory syndrome coronavirus 2 DEU/Vero E6 cells/2021	10002442	The epitope residues were calculated from [PDB: 7EY4] as the antigen residues at 4&Aring; atomic distance from the antibody.												0	0
1597463	Discontinuous peptide	L452, F453, Y470, A472, G473, S474, T475, V480, G482, F483, N484, C485, Y486, Q490							surface glycoprotein [Severe acute respiratory syndrome coronavirus 2]	QWW93436.1	Spike glycoprotein	P0DTC2	Severe acute respiratory syndrome coronavirus 2 DEU/Vero E6 cells/2021	Severe acute respiratory syndrome coronavirus 2 DEU/Vero E6 cells/2021	10002442	The epitope residues were calculated from [PDB: 7EZV] as the antigen residues at 4&Aring; atomic distance from the antibody.												0	0
1597464	Discontinuous peptide	R343, N436, N437, L438, D439, S440, K441, V442, G443, G444, P496, T497							surface glycoprotein [Severe acute respiratory syndrome coronavirus 2]	QWW93436.1	Spike glycoprotein	P0DTC2	Severe acute respiratory syndrome coronavirus 2 DEU/Vero E6 cells/2021	Severe acute respiratory syndrome coronavirus 2 DEU/Vero E6 cells/2021	10002442	The epitope residues were calculated from [PDB: 7EY5] as the antigen residues at 4&Aring; atomic distance from the antibody.												0	0
1597465	Discontinuous peptide	R400, D402, E403, R405, Q406, T412, G413, N414, D417, Y418, L452, F453, R454, K455, N457, Y470, A472, G473, S474, T475, F483, N484, Y486, Q490, Y498, Y502							surface glycoprotein [Severe acute respiratory syndrome coronavirus 2]	QWW93436.1	Spike glycoprotein	P0DTC2	Severe acute respiratory syndrome coronavirus 2 DEU/Vero E6 cells/2021	Severe acute respiratory syndrome coronavirus 2 DEU/Vero E6 cells/2021	10002442	The epitope residues were calculated from [PDB: 7EY0] as the antigen residues at 4&Aring; atomic distance from the antibody.												0	0
1597466	Discontinuous peptide	T342, R343, N436, N437, L438, K441, V442, G443, G444, N447, Q495, P496, T497							surface glycoprotein [Severe acute respiratory syndrome coronavirus 2]	QWW93436.1	Spike glycoprotein	P0DTC2	Severe acute respiratory syndrome coronavirus 2 DEU/Vero E6 cells/2021	Severe acute respiratory syndrome coronavirus 2 DEU/Vero E6 cells/2021	10002442	The epitope residues were calculated from [PDB: 7EZV] as the antigen residues at 4&Aring; atomic distance from the antibody.												0	0
1597467	Discontinuous peptide	T342, R343, Y348, L438, K441, V442, G444, Y446, N447, L449, I465, T467, G479, K481, F487, L489, S491							surface glycoprotein [Severe acute respiratory syndrome coronavirus 2]	QWW93436.1	Spike glycoprotein	P0DTC2	Severe acute respiratory syndrome coronavirus 2 DEU/Vero E6 cells/2021	Severe acute respiratory syndrome coronavirus 2 DEU/Vero E6 cells/2021	10002442	The epitope residues were calculated from [PDB: 7EYA] as the antigen residues at 4&Aring; atomic distance from the antibody.												0	0
1597468	Discontinuous peptide	T412, G413, N414, D417, Y418, Y446, L452, F453, T475, P476, K481, G482, F483, N484, Y486, Q490, S491							surface glycoprotein [Severe acute respiratory syndrome coronavirus 2]	QWW93436.1	Spike glycoprotein	P0DTC2	Severe acute respiratory syndrome coronavirus 2 DEU/Vero E6 cells/2021	Severe acute respiratory syndrome coronavirus 2 DEU/Vero E6 cells/2021	10002442	The epitope residues were calculated from [PDB: 7EY5] as the antigen residues at 4&Aring; atomic distance from the antibody.												0	0
1597629	Discontinuous peptide	G339, E340, N343, A344, T345, R346, N437, N440, L441, D442, S443, K444, V445, N448, Y451, P499, T500							surface glycoprotein [Severe acute respiratory syndrome coronavirus 2]	QHD43416.1	Spike glycoprotein	P0DTC2	Severe acute respiratory syndrome coronavirus 2	Severe acute respiratory syndrome coronavirus 2	2697049	The epitope residues were calculated from [PDB:7R8M] as the antigen residues at 4&Aring; atomic distance from the antibody.												1	1
1597630	Discontinuous peptide	G485, F486							surface glycoprotein [Severe acute respiratory syndrome coronavirus 2]	QHD43416.1	Spike glycoprotein	P0DTC2	Severe acute respiratory syndrome coronavirus 2	Severe acute respiratory syndrome coronavirus 2	2697049													0	0
1597631	Discontinuous peptide	R346, K444, G446							surface glycoprotein [Severe acute respiratory syndrome coronavirus 2]	QHD43416.1	Spike glycoprotein	P0DTC2	Severe acute respiratory syndrome coronavirus 2	Severe acute respiratory syndrome coronavirus 2	2697049													1	1
1597632	Discontinuous peptide	R403, T415, G416, K417, D420, Y421, L455, F456, R457, K458, N460, Y473, A475, G476, S477, F486, N487, Y489, Q493, Y495, T500, N501, G502, V503, Y505							surface glycoprotein [Severe acute respiratory syndrome coronavirus 2]	QHD43416.1	Spike glycoprotein	P0DTC2	Severe acute respiratory syndrome coronavirus 2	Severe acute respiratory syndrome coronavirus 2	2697049	The epitope residues were calculated from [PDB:7N3I] as the antigen residues at 4&Aring; atomic distance from the antibody.												1	1
1597633	Discontinuous peptide	R403, T415, G416, K417, D420, Y421, Y453, L455, F456, R457, K458, N460, Y473, A475, G476, S477, F486, N487, Y489, Q493, T500, N501, G502, G504, Y505							surface glycoprotein [Severe acute respiratory syndrome coronavirus 2]	QHD43416.1	Spike glycoprotein	P0DTC2	Severe acute respiratory syndrome coronavirus 2	Severe acute respiratory syndrome coronavirus 2	2697049	The epitope residues were calculated from [PDB:7R8L] as the antigen residues at 4&Aring; atomic distance from the antibody.												1	1
1597645	Discontinuous peptide on multi chain	A: K417, K444, Y449, N450, L452, L455, V483, E484, G485, F486, N487, Y489, F490, Q493, S494, Y495, Q498; B: N343, N370, S371, A372, S373, W436					QHD43416.1				Spike glycoprotein	P0DTC2	Severe acute respiratory syndrome coronavirus 2	Severe acute respiratory syndrome coronavirus 2	2697049	The epitope residues were calculated from [PDB: 7R8N] as the antigen residues at 4&Aring; atomic distance from the antibody.												1	1
1597646	Discontinuous peptide on multi chain	B: V445, G446, G447, Y449, N450, L452, Y453, L455, F456, G482, V483, E484, G485, F486, Y489, F490, Q493, S494, G496, Q498; E: A372, S373, N440, L441					QHD43416.1				Spike glycoprotein	P0DTC2	Severe acute respiratory syndrome coronavirus 2	Severe acute respiratory syndrome coronavirus 2	2697049	The epitope residues were calculated from [PDB: 7R8O] as the antigen residues at 4&Aring; atomic distance from the antibody.												1	1
1597880	Discontinuous peptide	Y369, S371, A372, F374, S375, F377, K378, C379, Y380, G381, V382, S383, P384, T385, V407, R408, P412, G413, D427, D428, F429, T430, V503, G504							Spike glycoprotein	P0DTC2.1	Spike glycoprotein	P0DTC2	Severe acute respiratory syndrome coronavirus 2	Severe acute respiratory syndrome coronavirus 2	2697049	The epitope residues were calculated from [PDB:7RKV] as the antigen residues at 4&Aring; atomic distance from the antibody.												1	1
1597881	Discontinuous peptide	Y369, S371, F377, K378, C379, Y380, G381, V382, S383, P384, T385, R408, P412, G413, Q414, T415, G416, D427, D428, F429, T430							Spike glycoprotein	P0DTC2.1	Spike glycoprotein	P0DTC2	Severe acute respiratory syndrome coronavirus 2	Severe acute respiratory syndrome coronavirus 2	2697049	The epitope residues were calculated from [PDB:7RKU] as the antigen residues at 4&Aring; atomic distance from the antibody.												1	1
1625483	Discontinuous peptide	F342, T345, R346, L368, S373, F374, W436, N437, N440, L441, K444, V445							surface glycoprotein [Severe acute respiratory syndrome coronavirus 2]	QHD43416.1	Spike glycoprotein	P0DTC2	Severe acute respiratory syndrome coronavirus 2	Severe acute respiratory syndrome coronavirus 2	2697049	The epitope residues were calculated from [PDB: 7V2A] as the antigen residues at 4&Aring; atomic distance from the antibody.												1	1
1625484	Discontinuous peptide	T345, R346, N439, N440, L441, S443, K444, V445, G446, G447, N450, Q498, P499, T500, Q506							surface glycoprotein [Severe acute respiratory syndrome coronavirus 2]	QHD43416.1	Spike glycoprotein	P0DTC2	Severe acute respiratory syndrome coronavirus 2	Severe acute respiratory syndrome coronavirus 2	2697049	The epitope residues were calculated from [PDB: 7V26] as the antigen residues at 4&Aring; atomic distance from the antibody.												1	1
1633579	Discontinuous peptide	Y369, S371, A372, F377, K378, C379, Y380, G381, V382, S383, P384, R408, P412, G413, Q414, T415, D420, D427, N460							Spike glycoprotein	P0DTC2.1	Spike glycoprotein	P0DTC2	Severe acute respiratory syndrome coronavirus 2	Severe acute respiratory syndrome coronavirus 2	2697049	The epitope residues were calculated from [PDB: 7N5H] as the antigen residues at 4&Aring; atomic distance from the antibody.												1	1
1642855	Discontinuous peptide	A348, N450, L452							surface glycoprotein [Severe acute respiratory syndrome coronavirus 2]	QHD43416.1	Spike glycoprotein	P0DTC2	Severe acute respiratory syndrome coronavirus 2	Severe acute respiratory syndrome coronavirus 2	2697049													0	0
1642856	Discontinuous peptide	F456, N487							surface glycoprotein [Severe acute respiratory syndrome coronavirus 2]	QHD43416.1	Spike glycoprotein	P0DTC2	Severe acute respiratory syndrome coronavirus 2	Severe acute respiratory syndrome coronavirus 2	2697049													0	0
1642857	Discontinuous peptide	G476, T478, G485, F486, N487							surface glycoprotein [Severe acute respiratory syndrome coronavirus 2]	QHD43416.1	Spike glycoprotein	P0DTC2	Severe acute respiratory syndrome coronavirus 2	Severe acute respiratory syndrome coronavirus 2	2697049													1	1
1642858	Discontinuous peptide	K417, E484, N487, N501							surface glycoprotein [Severe acute respiratory syndrome coronavirus 2]	QHD43416.1	Spike glycoprotein	P0DTC2	Severe acute respiratory syndrome coronavirus 2	Severe acute respiratory syndrome coronavirus 2	2697049													1	1
1642859	Discontinuous peptide	K417, F456, N460, A475, N487							surface glycoprotein [Severe acute respiratory syndrome coronavirus 2]	QHD43416.1	Spike glycoprotein	P0DTC2	Severe acute respiratory syndrome coronavirus 2	Severe acute respiratory syndrome coronavirus 2	2697049													1	1
1642860	Discontinuous peptide	K417, F456, N487							surface glycoprotein [Severe acute respiratory syndrome coronavirus 2]	QHD43416.1	Spike glycoprotein	P0DTC2	Severe acute respiratory syndrome coronavirus 2	Severe acute respiratory syndrome coronavirus 2	2697049													1	1
1642861	Discontinuous peptide	K417, L452, F490, N501							surface glycoprotein [Severe acute respiratory syndrome coronavirus 2]	QHD43416.1	Spike glycoprotein	P0DTC2	Severe acute respiratory syndrome coronavirus 2	Severe acute respiratory syndrome coronavirus 2	2697049													1	1
1642862	Discontinuous peptide	L452, E484							surface glycoprotein [Severe acute respiratory syndrome coronavirus 2]	QHD43416.1	Spike glycoprotein	P0DTC2	Severe acute respiratory syndrome coronavirus 2	Severe acute respiratory syndrome coronavirus 2	2697049													1	1
1642863	Discontinuous peptide	N343, T345, R346, W436							surface glycoprotein [Severe acute respiratory syndrome coronavirus 2]	QHD43416.1	Spike glycoprotein	P0DTC2	Severe acute respiratory syndrome coronavirus 2	Severe acute respiratory syndrome coronavirus 2	2697049													0	0
1642865	Discontinuous peptide	R346, N450, L452, E484, F490							surface glycoprotein [Severe acute respiratory syndrome coronavirus 2]	QHD43416.1	Spike glycoprotein	P0DTC2	Severe acute respiratory syndrome coronavirus 2	Severe acute respiratory syndrome coronavirus 2	2697049													1	1
1642866	Discontinuous peptide	R403, R408, K417, N501, Y505							surface glycoprotein [Severe acute respiratory syndrome coronavirus 2]	QHD43416.1	Spike glycoprotein	P0DTC2	Severe acute respiratory syndrome coronavirus 2	Severe acute respiratory syndrome coronavirus 2	2697049													1	1
1642867	Discontinuous peptide	Y449, L452, F490							surface glycoprotein [Severe acute respiratory syndrome coronavirus 2]	QHD43416.1	Spike glycoprotein	P0DTC2	Severe acute respiratory syndrome coronavirus 2	Severe acute respiratory syndrome coronavirus 2	2697049													0	0
1642869	Discontinuous peptide	E484, F486							Spike glycoprotein	P0DTC2.1	Spike glycoprotein	P0DTC2	Severe acute respiratory syndrome coronavirus 2	Severe acute respiratory syndrome coronavirus 2	2697049													1	1
1642871	Discontinuous peptide	H69, V70, Y144, L242, A243, L244, G261							Spike glycoprotein	P0DTC2.1	Spike glycoprotein	P0DTC2	Severe acute respiratory syndrome coronavirus 2	Severe acute respiratory syndrome coronavirus 2	2697049													1	1
1642874	Discontinuous peptide	K417, E484, F486							Spike glycoprotein	P0DTC2.1	Spike glycoprotein	P0DTC2	Severe acute respiratory syndrome coronavirus 2	Severe acute respiratory syndrome coronavirus 2	2697049													1	1
1642876	Discontinuous peptide	K417, N439, Y453, E484							Spike glycoprotein	P0DTC2.1	Spike glycoprotein	P0DTC2	Severe acute respiratory syndrome coronavirus 2	Severe acute respiratory syndrome coronavirus 2	2697049													1	1
1642878	Discontinuous peptide	K417, Y453, S477, E484, F486							Spike glycoprotein	P0DTC2.1	Spike glycoprotein	P0DTC2	Severe acute respiratory syndrome coronavirus 2	Severe acute respiratory syndrome coronavirus 2	2697049													1	1
1642880	Discontinuous peptide	N439, E484, N501							Spike glycoprotein	P0DTC2.1	Spike glycoprotein	P0DTC2	Severe acute respiratory syndrome coronavirus 2	Severe acute respiratory syndrome coronavirus 2	2697049													1	1
1642883	Discontinuous peptide	N439, Y453, E484							Spike glycoprotein	P0DTC2.1	Spike glycoprotein	P0DTC2	Severe acute respiratory syndrome coronavirus 2	Severe acute respiratory syndrome coronavirus 2	2697049													1	1
1642884	Discontinuous peptide	N439, Y453, T478, E484, N501							Spike glycoprotein	P0DTC2.1	Spike glycoprotein	P0DTC2	Severe acute respiratory syndrome coronavirus 2	Severe acute respiratory syndrome coronavirus 2	2697049													1	1
1642885	Discontinuous peptide	S477, T478, F486							Spike glycoprotein	P0DTC2.1	Spike glycoprotein	P0DTC2	Severe acute respiratory syndrome coronavirus 2	Severe acute respiratory syndrome coronavirus 2	2697049													1	1
1642887	Discontinuous peptide	V367, N439							Spike glycoprotein	P0DTC2.1	Spike glycoprotein	P0DTC2	Severe acute respiratory syndrome coronavirus 2	Severe acute respiratory syndrome coronavirus 2	2697049													0	0
1642888	Discontinuous peptide	V367, N439, Y453							Spike glycoprotein	P0DTC2.1	Spike glycoprotein	P0DTC2	Severe acute respiratory syndrome coronavirus 2	Severe acute respiratory syndrome coronavirus 2	2697049													0	0
1642889	Discontinuous peptide	W353, N354, R355, R357, Y449, N450, L452, R457, P463, F464, E465, R466, D467, I468, S469, T470, I472, G482, E484, F490, L492							Spike glycoprotein	P0DTC2.1	Spike glycoprotein	P0DTC2	Severe acute respiratory syndrome coronavirus 2	Severe acute respiratory syndrome coronavirus 2	2697049	The epitope residues were calculated from [PDB: 7DX4] as the antigen residues at 4&Aring; atomic distance from the antibody.												1	1
1642890	Discontinuous peptide	Y144, L242, A243, L244							Spike glycoprotein	P0DTC2.1	Spike glycoprotein	P0DTC2	Severe acute respiratory syndrome coronavirus 2	Severe acute respiratory syndrome coronavirus 2	2697049													1	1
1642891	Discontinuous peptide	Y144, L242, A243, L244, G261							Spike glycoprotein	P0DTC2.1	Spike glycoprotein	P0DTC2	Severe acute respiratory syndrome coronavirus 2	Severe acute respiratory syndrome coronavirus 2	2697049													1	1
1642892	Discontinuous peptide	Y144, Y145, H146, K147, K150, W152, R246, S247, Y248, L249							Spike glycoprotein	P0DTC2.1	Spike glycoprotein	P0DTC2	Severe acute respiratory syndrome coronavirus 2	Severe acute respiratory syndrome coronavirus 2	2697049	The epitope residues were calculated from [PDB: 7D4G] as the antigen residues at 4&Aring; atomic distance from the antibody.												1	1
1711622	Discontinuous peptide	K417, Y421, L455, F456, R457, K458, Y473, Q474, A475, G476, T478, P479, C480, V483, E484, G485, F486, N487, C488, Y489, F490, Q493							Spike glycoprotein	P0DTC2.1	Spike glycoprotein	P0DTC2	Severe acute respiratory syndrome coronavirus 2	Severe acute respiratory syndrome coronavirus 2	2697049	The epitope residues were calculated from [PDB: 7PHG and 7P40] as the antigen residues at 4&Aring; atomic distance from the antibody.												1	1
1711630	Discontinuous peptide	Y145, K150, W152							spike glycoprotein [Severe acute respiratory syndrome coronavirus 2]	QHR63250.2	Spike glycoprotein	P0DTC2	Severe acute respiratory syndrome coronavirus 2	Severe acute respiratory syndrome coronavirus 2	2697049													1	1
1711631	Discontinuous peptide	Y351, A352, W353, N360, L368, A419, V433, Y449, N450, D467, C480, E484, C488, F490, S494, R509							spike glycoprotein [Severe acute respiratory syndrome coronavirus 2]	QHR63250.2	Spike glycoprotein	P0DTC2	Severe acute respiratory syndrome coronavirus 2	Severe acute respiratory syndrome coronavirus 2	2697049													1	1
1711677	Discontinuous peptide	N354, R355, R357, D428, L461, K462, P463, F464, E465, R466							Spike glycoprotein	P0DTC2.1	Spike glycoprotein	P0DTC2	Severe acute respiratory syndrome coronavirus 2	Severe acute respiratory syndrome coronavirus 2	2697049	The epitope residues were calculated from [PDB: 7CYV] as the antigen residues at 4&Aring; atomic distance from the antibody.												0	0
1852152	Discontinuous peptide	E406							Spike glycoprotein	P0DTC2.1	Spike glycoprotein	P0DTC2	Severe acute respiratory syndrome coronavirus 2	Severe acute respiratory syndrome coronavirus 2	2697049													0	0
1852425	Discontinuous peptide	L455, F456, A475, G476, S477, T478, P479, E484, G485, F486, N487, Y489, Q493							Spike glycoprotein	P0DTC2.1	Spike glycoprotein	P0DTC2	Severe acute respiratory syndrome coronavirus 2	Severe acute respiratory syndrome coronavirus 2	2697049	The epitope residues were calculated from [PDB: 7LQ7] as the antigen residues at 4&Aring; atomic distance from the antibody.												1	1
1860777	Discontinuous peptide	E484, G485							Spike glycoprotein	P0DTC2.1	Spike glycoprotein	P0DTC2	Severe acute respiratory syndrome coronavirus 2	Severe acute respiratory syndrome coronavirus 2	2697049													1	1
1860778	Discontinuous peptide	K417, Y453, L455, F456, Y473, A475, T478, E484, G485, F486, N487, Y489, Q493							Spike glycoprotein	P0DTC2.1	Spike glycoprotein	P0DTC2	Severe acute respiratory syndrome coronavirus 2	Severe acute respiratory syndrome coronavirus 2	2697049	The epitope residues were calculated from [PDB: 7N4L] as the antigen residues at 4&Aring; atomic distance from the antibody.												1	1
1860779	Discontinuous peptide	K444, G446, Y449, N450, L452, V483, E484, G485, F486, Y489, F490, L492, Q493, S494, Y495, G496, Q498, Y505							Spike glycoprotein	P0DTC2.1	Spike glycoprotein	P0DTC2	Severe acute respiratory syndrome coronavirus 2	Severe acute respiratory syndrome coronavirus 2	2697049	The epitope residues were calculated from [PDB: 7N4J] as the antigen residues at 4&Aring; atomic distance from the antibody.												1	1
1860780	Discontinuous peptide	Q14, V16, Y144, K147, R246, Y248, P251, G252, D253							Spike glycoprotein	P0DTC2.1	Spike glycoprotein	P0DTC2	Severe acute respiratory syndrome coronavirus 2	Severe acute respiratory syndrome coronavirus 2	2697049													1	1
1860781	Discontinuous peptide	R355, R457, S459, K462, P463, F464, E465, R466, D467, I468, S469, E471, Q474, P479, C480, N481, G482, L518							Spike glycoprotein	P0DTC2.1	Spike glycoprotein	P0DTC2	Severe acute respiratory syndrome coronavirus 2	Severe acute respiratory syndrome coronavirus 2	2697049	The epitope residues were calculated from [PDB: 7N4I] as the antigen residues at 4&Aring; atomic distance from the antibody.												0	0
1860782	Discontinuous peptide	R403, K417, Y449, N501, Y505							Spike glycoprotein	P0DTC2.1	Spike glycoprotein	P0DTC2	Severe acute respiratory syndrome coronavirus 2	Severe acute respiratory syndrome coronavirus 2	2697049													1	1
1860783	Discontinuous peptide	T415, G416, K417, D420, Y421, L455, F456, R457, K458, N460, Y473, Q474, A475, G476, S477, F486, N487, Y489, Q493, Y505							Spike glycoprotein	P0DTC2.1	Spike glycoprotein	P0DTC2	Severe acute respiratory syndrome coronavirus 2	Severe acute respiratory syndrome coronavirus 2	2697049	The epitope residues were calculated from [PDB: 7NP1] as the antigen residues at 4&Aring; atomic distance from the antibody.												1	1
1860784	Discontinuous peptide	W353, R355, Y396, R457, K462, P463, F464, E465, R466, D467, I468, E516, L518							Spike glycoprotein	P0DTC2.1	Spike glycoprotein	P0DTC2	Severe acute respiratory syndrome coronavirus 2	Severe acute respiratory syndrome coronavirus 2	2697049	The epitope residues were calculated from [PDB: 7BNV] as the antigen residues at 4&Aring; atomic distance from the antibody.												0	0
1860785	Discontinuous peptide	Y144, Y145, H146, K147, K150, W152, Y248							Spike glycoprotein	P0DTC2.1	Spike glycoprotein	P0DTC2	Severe acute respiratory syndrome coronavirus 2	Severe acute respiratory syndrome coronavirus 2	2697049													1	1
1860786	Discontinuous peptide	Y145, H146, K147, R246, Y248, P251, G261							Spike glycoprotein	P0DTC2.1	Spike glycoprotein	P0DTC2	Severe acute respiratory syndrome coronavirus 2	Severe acute respiratory syndrome coronavirus 2	2697049													1	1
1860787	Discontinuous peptide	Y145, K147, W152							Spike glycoprotein	P0DTC2.1	Spike glycoprotein	P0DTC2	Severe acute respiratory syndrome coronavirus 2	Severe acute respiratory syndrome coronavirus 2	2697049													1	1
1860788	Discontinuous peptide	Y145, K147, Y248							Spike glycoprotein	P0DTC2.1	Spike glycoprotein	P0DTC2	Severe acute respiratory syndrome coronavirus 2	Severe acute respiratory syndrome coronavirus 2	2697049													1	1
1860789	Discontinuous peptide	Y369, N370, S371, A372, F374, S375, T376, F377, K378, C379, P384, T385, N388							Spike glycoprotein	P0DTC2.1	Spike glycoprotein	P0DTC2	Severe acute respiratory syndrome coronavirus 2	Severe acute respiratory syndrome coronavirus 2	2697049	The epitope residues were calculated from [PDB: 7N4M] as the antigen residues at 4&Aring; atomic distance from the antibody.												1	1
1860901	Discontinuous peptide	K417, Y449, L452, L455, F456, E484, G485, F486, N487, C488, Y489, F490, L492, Q493, S494, G496, Q498, N501, G502, Y505							Spike glycoprotein	P0DTC2.1	Spike glycoprotein	P0DTC2	Severe acute respiratory syndrome coronavirus 2	Severe acute respiratory syndrome coronavirus 2	2697049	The epitope residues were calculated from [PDB: 7TAS] as the antigen residues at 4&Aring; atomic distance from the antibody.												1	1
1860902	Discontinuous peptide	A152, S154, T155, P156, C157, V160, K161, G162, F163, N164, C165, Y166							surface glycoprotein, partial [Severe acute respiratory syndrome coronavirus 2]	QRF63450.1	Spike glycoprotein	P0DTC2	SARS-CoV2 Beta	SARS-CoV2 Beta	10002525	The epitope residues were calculated from [PDB: 7PS6] as the antigen residues at 4&Aring; atomic distance from the antibody.												0	0
1860903	Discontinuous peptide	F133, K161, G162, F163, Y166, Q170							surface glycoprotein, partial [Severe acute respiratory syndrome coronavirus 2]	QRF63450.1	Spike glycoprotein	P0DTC2	SARS-CoV2 Beta	SARS-CoV2 Beta	10002525	The epitope residues were calculated from [PDB: 7Q9J] as the antigen residues at 4&Aring; atomic distance from the antibody.												0	0
1860904	Discontinuous peptide	G123, Y126, Q170, S171, Y172, Q175, P176, T177, Y178, G179, Y182							surface glycoprotein, partial [Severe acute respiratory syndrome coronavirus 2]	QRF63450.1	Spike glycoprotein	P0DTC2	SARS-CoV2 Beta	SARS-CoV2 Beta	10002525	The epitope residues were calculated from [PDB: 7PS0] as the antigen residues at 4&Aring; atomic distance from the antibody.												0	0
1860905	Discontinuous peptide	G16, E17, N20, A21, T22, R23, S50, F51, W113, N117, L118, D119, S120, K121, V122, N125, N127, Y128							surface glycoprotein, partial [Severe acute respiratory syndrome coronavirus 2]	QRF63450.1	Spike glycoprotein	P0DTC2	SARS-CoV2 Beta	SARS-CoV2 Beta	10002525	The epitope residues were calculated from [PDB: 7PS2] as the antigen residues at 4&Aring; atomic distance from the antibody.												0	0
1860906	Discontinuous peptide	N117, S120, K121, V122, G123, Q175, P176, T177, Y178, G179, Y182							surface glycoprotein, partial [Severe acute respiratory syndrome coronavirus 2]	QRF63450.1	Spike glycoprotein	P0DTC2	SARS-CoV2 Beta	SARS-CoV2 Beta	10002525	The epitope residues were calculated from [PDB: 7PS6] as the antigen residues at 4&Aring; atomic distance from the antibody.												0	0
1860907	Discontinuous peptide	R80, D82, R85, D97, Y98, Y130, L132, F133, R134, Y150, F163, N164, Y166, Q170, S171, Y172, G173, Y178, G179, V180, Y182							surface glycoprotein, partial [Severe acute respiratory syndrome coronavirus 2]	QRF63450.1	Spike glycoprotein	P0DTC2	SARS-CoV2 Beta	SARS-CoV2 Beta	10002525	The epitope residues were calculated from [PDB: 7PRZ] as the antigen residues at 4&Aring; atomic distance from the antibody.												0	0
1860909	Discontinuous peptide	R80, R85, T92, D97, Y98, L132, F133, F163, N164, Y166, F167, Q170, S171, Y172, G173, T177, Y178, G179, Y182							surface glycoprotein, partial [Severe acute respiratory syndrome coronavirus 2]	QRF63450.1	Spike glycoprotein	P0DTC2	SARS-CoV2 Beta	SARS-CoV2 Beta	10002525	The epitope residues were calculated from [PDB: 7PS2] as the antigen residues at 4&Aring; atomic distance from the antibody.												0	0
1860911	Discontinuous peptide	R80, T92, G93, N94, D97, Y98, L132, F133, R134, K135, S136, N137, Y150, Q151, A152, G153, S154, F163, N164, Y166, Q170, T177, Y178, G179, Y182							surface glycoprotein, partial [Severe acute respiratory syndrome coronavirus 2]	QRF63450.1	Spike glycoprotein	P0DTC2	SARS-CoV2 Beta	SARS-CoV2 Beta	10002525	The epitope residues were calculated from [PDB: 7PS1] as the antigen residues at 4&Aring; atomic distance from the antibody.												0	0
1860912	Discontinuous peptide	S52, R80, G81, D82, R85, V180, G181, Y182, Y185							surface glycoprotein, partial [Severe acute respiratory syndrome coronavirus 2]	QRF63450.1	Spike glycoprotein	P0DTC2	SARS-CoV2 Beta	SARS-CoV2 Beta	10002525	The epitope residues were calculated from [PDB: 7Q9K] as the antigen residues at 4&Aring; atomic distance from the antibody.												0	0
1860913	Discontinuous peptide	T10, N11, L12, C13, P14, F15, G16, E17, F19, N20, T22, R23, V39, A40, D41, Y42, V44, L45, K205							surface glycoprotein, partial [Severe acute respiratory syndrome coronavirus 2]	QRF63450.1	Spike glycoprotein	P0DTC2	SARS-CoV2 Beta	SARS-CoV2 Beta	10002525	The epitope residues were calculated from [PDB: 7Q0G] as the antigen residues at 4&Aring; atomic distance from the antibody. An additional contact residue K527 is mismatched to P204 in the GenBank sequence.												0	0
1860914	Discontinuous peptide	T10, N11, L12, C13, P14, F15, G16, E17, F19, N20, T22, V39, A40, D41, Y42, V44, L45							surface glycoprotein, partial [Severe acute respiratory syndrome coronavirus 2]	QRF63450.1	Spike glycoprotein	P0DTC2	SARS-CoV2 Beta	SARS-CoV2 Beta	10002525	The epitope residues were calculated from [PDB: 7Q0H] as the antigen residues at 4&Aring; atomic distance from the antibody. Additional contact residues H332 and K527 are mismatched to I9 and P204, respectively, in the GenBank sequence.												0	0
1860915	Discontinuous peptide	T92, Y98, L132, F133, R134, K135, Y150, A152, G153, S154, T155, P156, V160, G162, F163, N164, Q170							surface glycoprotein, partial [Severe acute respiratory syndrome coronavirus 2]	QRF63450.1	Spike glycoprotein	P0DTC2	SARS-CoV2 Beta	SARS-CoV2 Beta	10002525	The epitope residues were calculated from [PDB: 7PS5] as the antigen residues at 4&Aring; atomic distance from the antibody.												0	0
1860916	Discontinuous peptide	V122, G123, Y126, G173, Q175, P176, T177, Y178							surface glycoprotein, partial [Severe acute respiratory syndrome coronavirus 2]	QRF63450.1	Spike glycoprotein	P0DTC2	SARS-CoV2 Beta	SARS-CoV2 Beta	10002525	The epitope residues were calculated from [PDB: 7PRY] as the antigen residues at 4&Aring; atomic distance from the antibody.												0	0
1860917	Discontinuous peptide	V122, G123, Y126, Q170, Q175, P176, T177, Y178, G179, Y182							surface glycoprotein, partial [Severe acute respiratory syndrome coronavirus 2]	QRF63450.1	Spike glycoprotein	P0DTC2	SARS-CoV2 Beta	SARS-CoV2 Beta	10002525	The epitope residues were calculated from [PDB: 7PS7] as the antigen residues at 4&Aring; atomic distance from the antibody.												0	0
1860919	Discontinuous peptide	Y28, Y126, N127, L129, T147, I149, P156, C157, N158, G159, V160, K161, F163, F167, L169							surface glycoprotein, partial [Severe acute respiratory syndrome coronavirus 2]	QRF63450.1	Spike glycoprotein	P0DTC2	SARS-CoV2 Beta	SARS-CoV2 Beta	10002525	The epitope residues were calculated from [PDB: 7PS4] as the antigen residues at 4&Aring; atomic distance from the antibody.												0	0
1860920	Discontinuous peptide	S13, Q14, C15, V16, N17, F18, T19, T76, F140, Y144, Y145, H146, K147, N148, M153, S155, E156, R158, L246, T247, P248							surface glycoprotein, partial [Severe acute respiratory syndrome coronavirus 2]	UBE67681.1	Spike glycoprotein	P0DTC2	SARS-CoV2 Beta	SARS-CoV2 Beta	10002525	The epitope residues were calculated from [PDB: 7Q0I] as the antigen residues at 4&Aring; atomic distance from the antibody.												1	1
1862805	Discontinuous peptide	A344, T345, R346, F347, A348, S349, Y351, A352, N440, K444, V445, G446, G447, N448, Y449, N450							Spike glycoprotein	P0DTC2.1	Spike glycoprotein	P0DTC2	Severe acute respiratory syndrome coronavirus 2	Severe acute respiratory syndrome coronavirus 2	2697049	The epitope residues were calculated from [PDB: 7PR0] as the antigen residues at 4&Aring; atomic distance from the antibody.												1	1
1862806	Discontinuous peptide	G485, F486, N487							Spike glycoprotein	P0DTC2.1	Spike glycoprotein	P0DTC2	Severe acute respiratory syndrome coronavirus 2	Severe acute respiratory syndrome coronavirus 2	2697049													0	0
1862807	Discontinuous peptide	R403, T415, G416, D420, Y421, L455, F456, R457, K458, N460, Y473, Q474, A475, G476, S477, E484, F486, N487, Y489, F490, L492, Q493, N501, G502, Y505							Spike glycoprotein	P0DTC2.1	Spike glycoprotein	P0DTC2	Severe acute respiratory syndrome coronavirus 2	Severe acute respiratory syndrome coronavirus 2	2697049	The epitope residues were calculated from [PDB: 7PQY] as the antigen residues at 4&Aring; atomic distance from the antibody.												1	1
1862808	Discontinuous peptide	T345, R346, N440, L441, S443, K444, V445, N448, N450, Y451, P499, T500							Spike glycoprotein	P0DTC2.1	Spike glycoprotein	P0DTC2	Severe acute respiratory syndrome coronavirus 2	Severe acute respiratory syndrome coronavirus 2	2697049	The epitope residues were calculated from [PDB: 7PQZ] as the antigen residues at 4&Aring; atomic distance from the antibody.												1	1
1862813	Discontinuous peptide	A123, T124, Y144, Y145, H146, K147, K150, S151, W152, M153							surface glycoprotein [Severe acute respiratory syndrome coronavirus 2]	QXP08802.1	Spike glycoprotein	P0DTC2	SARS-CoV2 Kappa	SARS-CoV2 Kappa	10002534	The epitope residues were calculated from [PDB: 7SOF] as the antigen residues at 4&Aring; atomic distance from the antibody.												1	1
1862956	Discontinuous peptide	Y369, N370, S371, A372, S373, F374, S375, T376, F377, K378, C379, S383, P384, T385, N437							surface glycoprotein [Severe acute respiratory syndrome coronavirus 2]	QHD43416.1	Spike glycoprotein	P0DTC2	Severe acute respiratory syndrome coronavirus 2	Severe acute respiratory syndrome coronavirus 2	2697049	The epitope residues were calculated from [PDB: 7SN3] as the antigen residues at 4&Aring; atomic distance from the antibody.												1	1
1864082	Discontinuous peptide	L455, K458, A475, G476, S477, T478, V483, E484, F486, N487, Q493							Spike glycoprotein	P0DTC2.1	Spike glycoprotein	P0DTC2	Severe acute respiratory syndrome coronavirus 2	Severe acute respiratory syndrome coronavirus 2	2697049	The epitope residues were calculated from [PDB: 7E3K] as the antigen residues at 4&Aring; atomic distance from the antibody.												1	1
1864083	Discontinuous peptide	L455, K458, Y473, A475, G476, S477, T478, V483, E484, G485, F486, N487, Q493							Spike glycoprotein	P0DTC2.1	Spike glycoprotein	P0DTC2	Severe acute respiratory syndrome coronavirus 2	Severe acute respiratory syndrome coronavirus 2	2697049	The epitope residues were calculated from [PDB: 7E3L] as the antigen residues at 4&Aring; atomic distance from the antibody.												1	1
1864085	Discontinuous peptide	N343, T345, R346, N439, N440, L441, D442, S443, K444, V445, N448, Y451, P499, T500, R509							Spike glycoprotein	P0DTC2.1	Spike glycoprotein	P0DTC2	Severe acute respiratory syndrome coronavirus 2	Severe acute respiratory syndrome coronavirus 2	2697049	The epitope residues were calculated from [PDB: 7F7E] as the antigen residues at 4&Aring; atomic distance from the antibody.												1	1
1864086	Discontinuous peptide	N439, N440, L441, D442, S443, K444, V445, G446, G447, N448, Y449, N450, Y451, L452, Y453, R454, L455, F456, R457, K458, P499, T500, N501, G502, V503, G504, Y505, Q506, P507, Y508, R509, V510, V511, V512, L513, S514, F515, E516, L517, L518							Spike glycoprotein	P0DTC2.1	Spike glycoprotein	P0DTC2	Severe acute respiratory syndrome coronavirus 2	Severe acute respiratory syndrome coronavirus 2	2697049													1	1
1864087	Discontinuous peptide	N99, R102, G103, W104, I119, N121, Y170, S172, Q173, P174, F175, L176, M177, D178, E180, K182, N188, R190, F192, H207, E224, L226							Spike glycoprotein	P0DTC2.1	Spike glycoprotein	P0DTC2	Severe acute respiratory syndrome coronavirus 2	Severe acute respiratory syndrome coronavirus 2	2697049	The epitope residues were calculated from [PDB: 7RW2] as the antigen residues at 4&Aring; atomic distance from the antibody.												0	0
1864088	Discontinuous peptide	R346, N439, N440, L441, S443, K444, V445, G446, G447, N448, Y449, N450, Q498, P499, T500							Spike glycoprotein	P0DTC2.1	Spike glycoprotein	P0DTC2	Severe acute respiratory syndrome coronavirus 2	Severe acute respiratory syndrome coronavirus 2	2697049													1	1

## Sheet: Linear epitopes
Supplementary Table 3. Information about of Neutralizing antibody epitopes identification in SARS-CoV-2 Omicron lineages
Epitope ID	Object Type	Description	Epitope Modified Residue(s)	Epitope Modification(s)	Starting Position	Ending Position	Non-peptidic epitope Accession	Epitope Synonyms	Antigen Name	Antigen Accession	Parent Protein	Parent Protein Accession	Organism Name	Parent Organism	Parent Organism ID	Epitope Comments	Epitope Relationship	Object Type	Description	Starting Position	Ending Position	Non-peptidic object Accession	Synonyms	Antigen Name	Parent Protein	Organism Name	Parent Organism	BA.1 mutation	BA.2 mutation
1336532	Linear peptide	DISTEIYQAGSTPCNGVEGFNCYFPLQSYGFQPTNGVGYQPYRVVVL			467	513			surface glycoprotein [Severe acute respiratory syndrome coronavirus 2]	YP_009724390.1	Spike glycoprotein	P0DTC2	Severe acute respiratory syndrome coronavirus 2	Severe acute respiratory syndrome coronavirus 2	2697049													1	1
1337002	Linear peptide	IYQAGSTPCNGVEGFNCYFPLQSY			472	495			surface glycoprotein [Severe acute respiratory syndrome coronavirus 2]	YP_009724390.1	Spike glycoprotein	P0DTC2	Severe acute respiratory syndrome coronavirus 2	Severe acute respiratory syndrome coronavirus 2	2697049													1	1
1379077	Linear peptide	DSFKEELDKYFKNHTS			1146	1161			surface glycoprotein [Severe acute respiratory syndrome coronavirus 2]	QOU99296.1	Spike glycoprotein	P0DTC2	Severe acute respiratory syndrome coronavirus 2	Severe acute respiratory syndrome coronavirus 2	2697049	The epitope sequence is identical in SARS-CoV-2 and SARS-CoV-1.												0	0
1386752	Linear peptide	PLQPELDSFKEELDKYFKNHTSPDV			1140	1164			Spike glycoprotein	P0DTC2.1	Spike glycoprotein	P0DTC2	Severe acute respiratory syndrome coronavirus 2	Severe acute respiratory syndrome coronavirus 2	2697049													0	0
1392375	Linear peptide	QGTTLPKGFYAEGSRGGS			163	180			Nucleoprotein	P0DTC9.1	Nucleoprotein	P0DTC9	Severe acute respiratory syndrome coronavirus 2	Severe acute respiratory syndrome coronavirus 2	2697049													0	0
1393862	Linear peptide	KEELDKYFKNHTSPDVD			1149	1165			Spike glycoprotein	P0DTC2.1	Spike glycoprotein	P0DTC2	Severe acute respiratory syndrome coronavirus 2	Severe acute respiratory syndrome coronavirus 2	2697049													0	0
1394090	Linear peptide	TEIYQAGSTPCNGVEGF			470	486			surface glycoprotein [Severe acute respiratory syndrome coronavirus 2]	YP_009724390.1	Spike glycoprotein	P0DTC2	Severe acute respiratory syndrome coronavirus 2	Severe acute respiratory syndrome coronavirus 2	2697049													1	1
1595221	Linear peptide	SFKEELDKYF			1147	1156			surface glycoprotein [Severe acute respiratory syndrome coronavirus 2]	QOU99296.1	Spike glycoprotein	P0DTC2	Severe acute respiratory syndrome coronavirus 2	Severe acute respiratory syndrome coronavirus 2	2697049													0	0
