# Supplementary material for: Genomic Variability of SARS-CoV-2 Omicron Variant Circulating in the Russian Federation during Early December 2021 and Late January 2022
Source: Pathogens. 2022 Dec 2;11(12):1461. doi: 10.3390/pathogens11121461 (PMC9786029; doi:10.3390/pathogens11121461)
Supplement: Supplementary file 1 [file pathogens-11-01461-s001.zip › TableS6.xlsx]

## Sheet: Delta_mut_SubsampledGISAID+FMBA
Identification of Delta-specific substitution in SARS-CoV-2 Omicron strains
Sequence ID	Pangolin lineage	Mutations
hCoV-19/Russia/SPE-RII-6207S/2021	BA.1.1	M:I82T
hCoV-19/Russia/SPE-RII-6803S/2021	BA.1.1	M:I82T
hCoV-19/Russia/SPE-RII-6222V1/2021	BA.1.1	M:I82T
hCoV-19/Russia/SPE-RII-MH48548S/2021	BA.1.1	M:I82T
hCoV-19/Russia/SPE-RII-10294S/2022	BA.1.1	M:I82T
hCoV-19/Russia/SPE-RII-10399S/2022	BA.1.1	M:I82T
hCoV-19/Russia/BA-RII-MH50589S/2022	BA.1.1	M:I82T
hCoV-19/Russia/AST-RII-MH51377S/2022	BA.1	M:I82T
hCoV-19/Russia/ULY-RII-MH51512S/2022	BA.1.1.13	M:I82T
hCoV-19/Russia/SPE-RII-MH51532S/2022	BA.2	M:I82T
hCoV-19/Russia/SPE-RII-MH51551S/2022	BA.1.1	M:I82T
hCoV-19/Russia/SPE-RII-MH51558S/2022	BA.1.1	M:I82T
hCoV-19/Russia/SPE-RII-MH51566S/2022	BA.1.15	M:I82T
hCoV-19/Russia/SPE-RII-MH51588S/2022	BA.1.1	M:I82T
hCoV-19/Russia/MO-RII-MH54279S/2022	BA.1.1	M:I82T
hCoV-19/Russia/MO-RII-MH54284S/2022	BA.1.1	M:I82T
hCoV-19/Russia/MO-RII-MH54286S/2022	BA.1.1	M:I82T
hCoV-19/Russia/MO-RII-MH54292S/2022	BA.1.1	M:I82T
hCoV-19/NewZealand/22MV0001/2021	BA.1.1	N:R203M
hCoV-19/Russia/SPE-RII-6345S/2021	BA.1.1	S:L452R
hCoV-19/Russia/SPE-RII-6347S/2021	BA.1.1	S:L452R
hCoV-19/Russia/SPE-RII-6351S/2021	BA.1.1	S:L452R
hCoV-19/Russia/AST-RII-MH51389S/2022	BA.1	S:L452R
hCoV-19/Russia/SAR-RII-MH52239S/2022	BA.1.1	S:L452R
hCoV-19/Russia/SAR-RII-MH52246S/2022	BA.1.1	S:L452R
hCoV-19/Russia/SAR-RII-MH52250S/2022	BA.1.1	S:L452R
hCoV-19/Russia/SAR-RII-MH52275S/2022	BA.1.1	S:L452R
hCoV-19/Russia/KB-RII-MH52317S/2022	BA.1.1	S:L452R
hCoV-19/Russia/KB-RII-MH52326S/2022	BA.1.17	S:L452R
hCoV-19/Russia/KB-RII-MH52328S/2022	BA.1.1	S:L452R
hCoV-19/Russia/IVA-RII-MH57857S/2022	BA.1.1	S:L452R
hCoV-19/Russia/SPE-RII-6343S/2021	BA.1.1	S:L452R, M:I82T
hCoV-19/Russia/SPE-RII-6350S/2021	BA.1.1	S:L452R, M:I82T
hCoV-19/Russia/SPE-RII-6379S/2021	BA.1.9	S:L452R, M:I82T
hCoV-19/Russia/SPE-RII-5994V1/2021	BA.1.1	S:L452R, M:I82T
hCoV-19/Russia/BA-RII-MH50581S/2022	BA.1.15	S:L452R, M:I82T
hCoV-19/Russia/SPE-RII-9569S/2022	BA.1.1	S:L452R, M:I82T
hCoV-19/Russia/SPE-RII-9601S/2022	BA.1.1	S:L452R, M:I82T
hCoV-19/Russia/KL-RII-MH50646S/2022	BA.1.1	S:L452R, M:I82T, ORF1a:P2046L
hCoV-19/Russia/AST-RII-MH51381S/2022	BA.1	S:L452R, M:I82T
hCoV-19/Russia/SAR-RII-MH52234S/2022	BA.1.1	S:L452R, M:I82T
hCoV-19/Russia/SAR-RII-MH52278S/2022	BA.1.1	S:L452R, M:I82T
hCoV-19/Russia/KB-RII-MH52296S/2022	BA.1	S:L452R, M:I82T
hCoV-19/Russia/MAG-RII-MH54241S/2022	BA.1.1	S:L452R, M:I82T
hCoV-19/Wuhan/WH01/2019	B
hCoV-19/Wuhan/Hu-1/2019	B
hCoV-19/Wuhan/HB-WH5-222/2020	B
hCoV-19/Singapore/9648/2021	BA.1.1
hCoV-19/Singapore/9637/2021	BA.1
hCoV-19/Botswana/R52B46_BHP_AAC32043/2021	BA.1
hCoV-19/Mexico/CHP-INMEGEN-47-237/2021	BA.1.15
hCoV-19/Mexico/TAB-INMEGEN-47-195/2021	BA.1
hCoV-19/Mexico/TAB-INMEGEN-47-249/2021	BA.1.15
hCoV-19/Montenegro/589491/2021	BA.1.1
hCoV-19/Canada/MB-NML-260515/2021	BA.1.14
hCoV-19/SouthAfrica/CERI-KRISP-K032700/2021	BA.1
hCoV-19/Ghana/TRA-2291/2021	BA.1
hCoV-19/Botswana/R43B68_BHP_121142361/2021	BA.1
hCoV-19/Australia/QLD5035/2021	BA.1.17
hCoV-19/USA/NV-NSPHL-488210/2021	BA.1.1
hCoV-19/Nigeria/NCDC-NR1525/2021	BA.1.1
hCoV-19/SouthAfrica/NICD-N23575/2021	BA.1
hCoV-19/Malawi/MLW-00275/2021	BA.1
hCoV-19/Mexico/VER-INMEGEN-45-130/2021	BA.1.15
hCoV-19/Pakistan/NIH-B32-S1/2021	BA.1
hCoV-19/Chile/VS-194985/2021	BA.1.1
hCoV-19/Mozambique/CERI-KRISP-K032754/2021	BA.1
hCoV-19/Mozambique/CERI-KRISP-K032765/2021	BA.1
hCoV-19/Oman/52124429/2021	BA.1
hCoV-19/NewZealand/21CH0996/2021	BA.1
hCoV-19/Zambia/ZMB-128376/2021	BA.1.17
hCoV-19/Zambia/ZMB-128404/2021	BA.1
hCoV-19/Zambia/ZMB-128421/2021	BA.1
hCoV-19/Panama/SEQ773/2021	BA.1.17
hCoV-19/Spain/CT-HUGTiPM062KF8G2/2021	BA.1.17
hCoV-19/Belgium/AZDelta-2150-06535/2021	BA.1
hCoV-19/Belgium/ULG-23129/2021	BA.1.1
hCoV-19/India/TG-GMCH-ICMR-INSACOG-C309181/2021	BA.1.15
hCoV-19/Ecuador/USFQ-2479/2021	BA.1.1
hCoV-19/Malta/MDxMDHO33/2021	BA.1
hCoV-19/Jordan/Biolab0424/2021	BA.1.17
hCoV-19/Canada/un-UB-KSL-04393/2021	BA.1.1.10
hCoV-19/Curacao/CW-RIVM-78546/2021	BA.1.1
hCoV-19/Curacao/CW-RIVM-78540/2021	BA.1.1
hCoV-19/Japan/IC-2460/2021	BA.1
hCoV-19/HongKong/HK-HKPU-12404/2021	BA.1
hCoV-19/SouthAfrica/NICD-R17617/2021	BA.1
hCoV-19/USA/IL-CDC-ASC210633705/2021	BA.1
hCoV-19/USA/SD-CDC-ASC210629121/2021	BA.1
hCoV-19/USA/DE-CDC-LC0445581/2021	BA.1
hCoV-19/USA/GA-GPHL-2682/2021	BA.1.1
hCoV-19/Algeria/95495-46/2021	BA.1
hCoV-19/Zhejiang/4081/2021	BA.1.15
hCoV-19/Australia/QLD2791/2021	BA.1.17
hCoV-19/Spain/MD-HGUGM-5832776/2021	BA.1
hCoV-19/Australia/NSW-ICPMR-15864/2021	BA.1.1
hCoV-19/Lebanon/LAU-CVD-O2/2021	BA.1
hCoV-19/Lebanon/LAU-CVD-O4/2021	BA.1.1
hCoV-19/Mozambique/CERI-KRISP-K032759/2021	BA.1
hCoV-19/England/MILK-2E105DD/2021	BA.1.15.1
hCoV-19/Nepal/NPHL-S-1004/2021	BA.1
hCoV-19/Cambodia/899919/2021	BA.1
hCoV-19/Romania/B-39484/2021	BA.1.1.1
hCoV-19/USA/GA-CDC-MMB12206232/2021	BA.1.15
hCoV-19/Denmark/DCGC-300759/2022	BA.2
hCoV-19/USA/NY-Wadsworth-21108019-01/2021	BA.1.1
hCoV-19/Portugal/PT24435/2021	BA.1.15
hCoV-19/Azerbaijan/MHTM2/2022	BA.1.1
hCoV-19/Australia/ACT-2315/2021	BA.1.17
hCoV-19/Australia/ACT-2567/2021	BA.1.17
hCoV-19/Mexico/AGU-ISSEA_Lesp-34633-s8/2021	BA.1.1
hCoV-19/Denmark/DCGC-291660/2021	BA.2
hCoV-19/USA/ID-IBL-779207/2021	BA.1
hCoV-19/Mexico/SIN_CIAD-MZT_HJ4266/2021	BA.1
hCoV-19/Zimbabwe/QIBZIM-71014/2021	BA.1
hCoV-19/USA/HI-H216746/2021	BA.1.1.2
hCoV-19/Australia/SA6598/2021	BA.1.17
hCoV-19/Australia/SA4472/2021	BA.1.17
hCoV-19/Azerbaijan/MHTM12/2022	BA.1
hCoV-19/Azerbaijan/Aghayev_AR/2022	BA.1
hCoV-19/Malawi/MLW-00326/2021	BA.1.13
hCoV-19/Suriname/SR-907/2021	BA.1
hCoV-19/Mozambique/CERI-KRISP-K033848/2021	BA.1
hCoV-19/Italy/VEN-IZSVe-22RS8009-39_PD/2022	BA.1.17
hCoV-19/Zimbabwe/QIBZIM-70369/2021	BA.1
hCoV-19/Zimbabwe/QIBZIM-70545/2021	BA.1
hCoV-19/Zimbabwe/QIBZIM-70543/2021	BA.1
hCoV-19/Zimbabwe/QIBZIM-70413/2021	BA.1
hCoV-19/Ecuador/NIC-INSPI-370092/2021	BA.1.1
hCoV-19/Philippines/PH-PGC-102407/2021	BA.2.3
hCoV-19/USA/WY-WYPHL-22001910/2022	BA.1.1
hCoV-19/USA/MA-CDCBI-CRSP_2WFOVQJZ4T6Q3IYK/2021	BA.1.1
hCoV-19/USA/WA-CDC-UW22020281001/2022	BA.1.1
hCoV-19/Iran/AN293/2022	BA.1.1.4
hCoV-19/Belize/CML-358/2022	BA.1.1
hCoV-19/USA/AZ-CDC-QDX32243633/2021	BA.1
hCoV-19/Belize/CML-361/2022	BA.1.1
hCoV-19/Australia/ACT3105/2022	BA.1.17
hCoV-19/Djibouti/NAMRU3_A97/2021	BA.1.1
hCoV-19/Djibouti/NAMRU3_A587/2021	BA.1.1
hCoV-19/Djibouti/NAMRU3_A274/2022	BA.1.1
hCoV-19/Djibouti/NAMRU3_H677/2021	BA.1.1
hCoV-19/Djibouti/NAMRU3_CI-025/2021	BA.1.1
hCoV-19/Germany/RP-RKI-I-533322/2022	BA.1
hCoV-19/Morocco/248/2021	BA.1
hCoV-19/Morocco/208/2021	BA.1
hCoV-19/Turkey/HSGM-G1138/2022	BA.1.1
hCoV-19/Belgium/Jessa_11-2206-006786/2022	BA.1.1
hCoV-19/Netherlands/ZE-MVD-CWGS2200891/2022	BA.1.1
hCoV-19/env/Austria/CeMM24268/2022	BA.1
hCoV-19/Switzerland/ZH-UZH-IMV-462447dd/2022	BA.1.1.11
hCoV-19/Netherlands/FR-RIVM-80490/2021	BA.1.1
hCoV-19/Kenya/ILRI_COVM02495/2021	BA.1.1
hCoV-19/Netherlands/DR-RIVM-80310/2021	BA.1.1
hCoV-19/Kenya/ILRI_COVM02600/2022	BA.1.1
hCoV-19/Kenya/ILRI_COVM02609/2022	BA.1.14
hCoV-19/Kenya/ILRI_COVM02447/2021	BA.1.17
hCoV-19/Australia/ACT3345/2022	BA.1.15.1
hCoV-19/Australia/ACT3269/2022	BA.1.17
hCoV-19/Australia/ACT3437/2022	BA.1.17
hCoV-19/NewZealand/22CH1026/2022	BA.2
hCoV-19/Ireland/MN-NVRL-S21IRL00582168/2021	BA.1.17
hCoV-19/NewZealand/22CV2002/2022	BA.1.1.9
hCoV-19/Ireland/G-Enfer-COV020222080_A7/2022	BA.2
hCoV-19/SintMaarten/SX-RIVM-86476/2022	BA.1.1
hCoV-19/Ireland/MH-Enfer-COV040222006_A7/2022	BA.2
hCoV-19/Ireland/CE-Enfer-COV010222043_C12/2022	BA.2
hCoV-19/Djibouti/NAMRU3_A361/2022	BA.1.1
hCoV-19/Djibouti/NAMRU3_A674/2022	BA.1.1
hCoV-19/Djibouti/NAMRU3_A130/2022	BA.1.1
hCoV-19/Syria/Northwest-0157/2022	BA.1
hCoV-19/Syria/Northwest-0156/2022	BA.1
hCoV-19/Poland/Kce-1496/2022	BA.1.1
hCoV-19/Palau/PW-CDC-2-5546708/2021	BA.1.1
hCoV-19/Palau/PW-CDC-2-5546529/2021	BA.1.1
hCoV-19/USA/ND-NDDH-11323/2022	BA.1.1
hCoV-19/Brazil/MG-FIOCRUZ-861/2022	BA.1
hCoV-19/France/BFC-HMN-22022070102/2022	BA.1.1.1
hCoV-19/NewZealand/22CH0917/2022	BA.2
hCoV-19/NewZealand/22CH1137/2022	BA.1.1.9
hCoV-19/NewZealand/22MV0836/2022	BA.1.1.9
hCoV-19/NewZealand/22CH0951/2022	BA.1.1.9
hCoV-19/NewZealand/22CH0971/2022	BA.1.1.9
hCoV-19/NewZealand/22CH1094/2022	BA.1.1.9
hCoV-19/USA/MN-CDC-IBX418852884006/2022	BA.1.15
hCoV-19/NewZealand/22CH0884/2022	BA.1.1.9
hCoV-19/USA/TN-VUMC-O-2216/2021	BA.1.15
hCoV-19/NewZealand/22CH1024/2022	BA.1.1.9
hCoV-19/NewZealand/22CH0908/2022	BA.1.1.9
hCoV-19/NewZealand/22CH0882/2022	BA.2
hCoV-19/NewZealand/22CH0950/2022	BA.2
hCoV-19/NewZealand/22CH1040/2022	BA.1.1.9
hCoV-19/Brunei/9822003256/2022	BA.1
hCoV-19/NewZealand/22MV0898/2022	BA.1.1.9
hCoV-19/CostaRica/INC-2923-739927/2022	BA.1.1
hCoV-19/CostaRica/INC-2891-737867/2022	BA.1.15
hCoV-19/Zambia/CHAZ-CHS0734/2021	BA.1
hCoV-19/USA/VA-CDC-ASC210650765/2022	BA.1.1
hCoV-19/England/MILK-371CF04/2022	BA.1.17
hCoV-19/Denmark/DCGC-381965/2022	BA.2
hCoV-19/SouthAfrica/NICD-N34243/2022	BA.2
hCoV-19/Canada/NL-PHML-323003/2022	BA.1.1
hCoV-19/USA/SD-CDC-2-5589007/2022	BA.1.1.16
hCoV-19/USA/FL-BPHL-1541/2022	BA.1.1
hCoV-19/Italy/LAZ-AMC-211228977-DS/2021	BA.1.17
hCoV-19/USA/MN-MDH-22570/2022	BA.1.1
hCoV-19/env/Liechtenstein/CeMM24340/2022	BA.1
hCoV-19/Canada/BC-BCCDC-323784/2022	BA.1
hCoV-19/Poland/5782786780/2022	BA.1.1.1
hCoV-19/Mexico/MEX-INMEGEN-58-258/2022	BA.1.1
hCoV-19/Mexico/CMX-INMEGEN-58-361/2022	BA.1.1
hCoV-19/USA/AR-CDC-QDX33478841/2022	BA.1.1
hCoV-19/Switzerland/AG-ETHZ-35964626/2022	BA.2
hCoV-19/Switzerland/ZH-ETHZ-35795629/2022	BA.1.1.11
hCoV-19/Cameroon/DO334088/2021	BA.1.1.14
hCoV-19/Cameroon/EXTN-17044/2021	BA.1.17
hCoV-19/Cameroon/DO334112/2021	BA.1.15
hCoV-19/Australia/VIC39894/2022	BA.1.17
hCoV-19/Peru/JUN-13451/2022	BA.1
hCoV-19/USA/TN-ASC-210651073/2022	BA.1.1
hCoV-19/Malta/MDxMDHO126/2022	BA.1
hCoV-19/Ecuador/USFQ-2696/2022	BA.1
hCoV-19/Guadeloupe/CERBAHC-02150707/2022	BA.1.1
hCoV-19/CzechRepublic/NAT-22-15404/2022	BA.1.17
hCoV-19/Croatia/28368/2022	BA.1.1
hCoV-19/Croatia/27821/2022	BA.1.1
hCoV-19/Croatia/28714/2022	BA.1
hCoV-19/Croatia/28741/2022	BA.1.1
hCoV-19/Peru/LIM-UPCH-2734/2022	BA.1.17
hCoV-19/Estonia/RC0365296/2022	BA.1.1
hCoV-19/Peru/LIM-UPCH-2788/2022	BA.1.15
hCoV-19/Peru/LIM-UPCH-2787/2022	BA.1
hCoV-19/Peru/LIM-UPCH-2796/2022	BA.1.1
hCoV-19/India/KA-0902NARA026/2022	BA.2
hCoV-19/Cameroon/DO334072V14/2021	BA.1
hCoV-19/Latvia/2201031296/2022	BA.1.13
hCoV-19/Latvia/2112094627/2021	BA.1.13
hCoV-19/Latvia/3873978/2022	BA.1
hCoV-19/Estonia/5261131-01/2022	BA.1
hCoV-19/Slovakia/run220216_RUVZ_TN-22-0423/2022	BA.1.1
hCoV-19/Ireland/MN-NVRL-S22IRL00063521/2022	BA.1.1.15
hCoV-19/Croatia/22746/2022	BA.1.17
hCoV-19/BosniaandHerzegovina/VFS-UNSA-LMGFI1139/2022	BA.1.17
hCoV-19/Malta/MDxMDHO147/2022	BA.1
hCoV-19/Mexico/MEX-INMEGEN-56-312/2022	BA.1.1.16
hCoV-19/Slovakia/uvzsr-BA_22_00103-H03-BA_22_00003143/2022	BA.1
hCoV-19/Mexico/MOR-INER-IBT-1554/2022	BA.1
hCoV-19/SouthKorea/KDCA28139/2022	BA.1.1
hCoV-19/Denmark/DCGC-359848/2022	BA.2
hCoV-19/Montenegro/134117/2022	BA.2
hCoV-19/Montenegro/134663/2022	BA.2
hCoV-19/Guatemala/598-LNSGua/2022	BA.1.1
hCoV-19/Guatemala/1479-LNSGua/2022	BA.1.1
hCoV-19/Guatemala/1335-LNSGua/2022	BA.1.1
hCoV-19/Malaysia/UNIMAS-GHML881/2022	BA.1.1
hCoV-19/Malaysia/UNIMAS-GHML880/2022	BA.1.1
hCoV-19/Brazil/SP-IB_150312/2022	BA.1
hCoV-19/Brazil/SP-IB_150433/2022	BA.1.14
hCoV-19/Brazil/SP-IB_150248/2022	BA.1.14
hCoV-19/Brazil/SP-IB_150350/2022	BA.1.14
hCoV-19/Brazil/SP-IB_150114/2022	BA.1.1
hCoV-19/Sweden/01_SE100_22CS101433/2022	BA.2
hCoV-19/Guatemala/INC-LNS-160/2022	BA.1.1
hCoV-19/Guatemala/INC-LNS-161/2022	BA.1.1
hCoV-19/Guatemala/INC-LNS-189/2022	BA.1
hCoV-19/CzechRepublic/FNP0860/2022	BA.1.1
hCoV-19/Guatemala/INC-LNS-197/2021	BA.1.1
hCoV-19/Canada/NS-NML-322739/2022	BA.1.1
hCoV-19/Peru/LIM-UPCH-2592/2022	BA.1.15
hCoV-19/Canada/NS-NML-322674/2022	BA.1.1
hCoV-19/Australia/NSW-ICPMR-20373/2022	BA.1.17
hCoV-19/Australia/NSW-ICPMR-20174/2022	BA.1.1
hCoV-19/England/ALDP-358AE7F/2022	BA.1.1
hCoV-19/Brazil/PE-FIOCRUZ-IAM8345/2022	BA.1
hCoV-19/Canada/NL-NML-306476/2022	BA.1.1
hCoV-19/USA/IA-SHL-2035648/2022	BA.1.1
hCoV-19/Slovakia/run220209_RUVZ_TN-22-0319/2022	BA.1.1
hCoV-19/CzechRepublic/UKDD-ZUUL-D20220078/2022	BA.1.17
hCoV-19/SouthAfrica/CERI-KRISP-K034860/2022	BA.1
hCoV-19/Germany/BW-RKI-I-432868/2022	BA.1.17
hCoV-19/Philippines/PH-RITM-952/2022	BA.2.3
hCoV-19/Philippines/PH-RITM-955/2022	BA.2.3
hCoV-19/Mauritius/4423/2022	BA.1.1.1
hCoV-19/Indonesia/BT-NIHRD-MI.22.13674/2022	BA.2
hCoV-19/Germany/BW-RKI-I-456380/2022	BA.1.1
hCoV-19/HongKong/HKU-220213-040/2022	BA.2.2
hCoV-19/HongKong/HKU-220213-357/2022	BA.1.1
hCoV-19/Singapore/1349/2022	BA.1.1
hCoV-19/Netherlands/GR-UMCG-MMB_4692/2022	BA.1.1.1
hCoV-19/Ireland/WX-NVRL-S22IRL00065434/2022	BA.1.1
hCoV-19/Luxembourg/LNS7320823/2022	BA.1.1.1
hCoV-19/Austria/LB-R00059-S158/2022	BA.2
hCoV-19/Austria/LB-R00059-S326/2022	BA.2
hCoV-19/NorthernMarianaIslands/MP-CDC-2-5546711/2022	BA.1.15
hCoV-19/Luxembourg/LNS0408012/2022	BA.1
hCoV-19/Luxembourg/LNS4401871/2022	BA.1.1
hCoV-19/NorthernMarianaIslands/MP-CDC-2-5546639/2022	BA.1.15
hCoV-19/Luxembourg/LNS9967322/2022	BA.1.1.1
hCoV-19/Australia/WA1353/2022	BA.1.17
hCoV-19/Brazil/AM-FIOCRUZ-ILMD2203096/2022	BA.1
hCoV-19/USA/VA-CDC-LC0529520/2022	BA.1.1
hCoV-19/USA/SC-CDC-LC0529550/2022	BA.1.1
hCoV-19/USA/TX-CDC-LC0530225/2022	BA.1.1
hCoV-19/Finland/THL-202205271/2022	BA.1
hCoV-19/Singapore/1679/2022	BA.1.1
hCoV-19/Ukraine/16-68934/2022	BA.1.1
hCoV-19/Ukraine/52-69019/2022	BA.1
hCoV-19/USA/SD-CDC-ASC210692969/2022	BA.1.1
hCoV-19/Japan/RIMD05119/2022	BA.1.1.1
hCoV-19/Mexico/CHP-INMEGEN-58-84/2022	BA.1.1
hCoV-19/Belgium/CHUNamur14021804/2022	BA.1.1
hCoV-19/Chile/AN-21609/2022	BA.1.1
hCoV-19/Chile/RM-24747/2022	BA.1.1
hCoV-19/Chile/MA-23438/2022	BA.1.1
hCoV-19/Chile/LL-25703/2022	BA.1.1
hCoV-19/Chile/AT-25623/2022	BA.1.1
hCoV-19/Mongolia/UB-403936/2021	BA.1.1
hCoV-19/Argentina/INEI119183/2022	BA.1.1
hCoV-19/Argentina/INEI119225/2022	BA.1.1
hCoV-19/Argentina/INEI119118/2022	BA.1
hCoV-19/Guadeloupe/IPP06472/2022	BA.1.1
hCoV-19/Sweden/01_SE100_22CS501780/2022	BA.2
hCoV-19/DominicanRepublic/1845731-LNSPDD/2022	BA.1
hCoV-19/Colombia/VAC-ICE-SCOV-851/2022	BA.1.1
hCoV-19/Slovenia/30050/2022	BA.1.1
hCoV-19/Scotland/QEUH-35C9B40/2022	BA.1.1
hCoV-19/Turkey/HSGM-G735/2022	BA.1
hCoV-19/Guadeloupe/CERBAHC-0121811/2022	BA.1.1
hCoV-19/Greece/5729/2022	BA.1.1
hCoV-19/Canada/BC-BCCDC-340827/2022	BA.1.1
hCoV-19/Spain/CT-HUB03912/2022	BA.1.17
hCoV-19/Spain/CT-HUB03986/2022	BA.1.1
hCoV-19/USA/IL-CDC-LC0516402/2022	BA.1.15
hCoV-19/Ecuador/NIC-INSPI-398087/2022	BA.1.1
hCoV-19/Ecuador/NIC-INSPI-397941/2022	BA.1.1
hCoV-19/Mexico/CAM_CIAD-IMSS_202201004854/2022	BA.1.1
hCoV-19/Mexico/ROO_CIAD-IMSS_202201004693/2022	BA.1.1
hCoV-19/Mexico/HID_CIAD-IMSS_202201028362/2022	BA.1.1
hCoV-19/Mexico/HID_CIAD-IMSS_202201028358/2022	BA.1.1
hCoV-19/Mexico/NLE_CIAD-IMSS_202201013535/2022	BA.1.15
hCoV-19/Mexico/JAL_CIAD-IMSS_202201010886/2022	BA.1.1
hCoV-19/Mexico/JAL_CIAD-IMSS_202201010890/2022	BA.1.1
hCoV-19/Mexico/DUR_CIAD-IMSS_202201012610/2022	BA.1.1
hCoV-19/Mexico/NLE_CIAD-IMSS_202201013494/2022	BA.1.1
hCoV-19/Mexico/MEX_CIAD-IMSS_202201028127/2022	BA.1
hCoV-19/Mexico/NAY_CIAD-IMSS_202201011067/2022	BA.1.1
hCoV-19/Jordan/Biolab0526/2022	BA.2
hCoV-19/Mexico/TLA_CIAD-IMSS_202201028047/2022	BA.1.1
hCoV-19/ElSalvador/INC-LNSP-130/2022	BA.1.1
hCoV-19/ElSalvador/INC-LNSP-129/2022	BA.1.1
hCoV-19/ElSalvador/INC-LNSP-166/2022	BA.1.15
hCoV-19/ElSalvador/INC-LNSP-170/2022	BA.1.1
hCoV-19/Poland/PZH-UMB-15819/2022	BA.1.1
hCoV-19/ElSalvador/INC-LNSP-154/2022	BA.1.15
hCoV-19/ElSalvador/INC-LNSP-163/2022	BA.1.1
hCoV-19/ElSalvador/INC-LNSP-157/2022	BA.1.1
hCoV-19/ElSalvador/INC-LNSP-148/2022	BA.1.1
hCoV-19/ElSalvador/INC-LNSP-149/2022	BA.1.1
hCoV-19/USA/PA-CDC-LC0510745/2022	BA.1
hCoV-19/Moldova/Nr-6959/2022	BA.1
hCoV-19/Congo/RC-481/2021	BA.1.15.1
hCoV-19/USA/CO-CDPHE-2102890074/2022	BA.1.1
hCoV-19/Brazil/SC-FIOCRUZ-3168/2022	BA.1
hCoV-19/Canada/ON-PHL-22-06816-v2/2022	BA.1
hCoV-19/Australia/NT-RDH-153/2022	BA.1.17
hCoV-19/Australia/NT-RDH-101/2022	BA.1.17
hCoV-19/Australia/NT-RDH-151/2022	BA.1.17
hCoV-19/Australia/NT-RDH-165/2022	BA.1.17
hCoV-19/Australia/NT-RDH-131/2022	BA.1.17
hCoV-19/Australia/NT-RDH-166/2022	BA.1.17
hCoV-19/Thailand/DMSc-07854/2022	BA.2
hCoV-19/Gambia/19944/2022	BA.1.1
hCoV-19/USA/NM-TG1229254/2022	BA.1.1
hCoV-19/USA/SC-CDC-MMB13971477/2022	BA.1.1
hCoV-19/Australia/SA104558/2022	BA.2
hCoV-19/Australia/SA103973/2022	BA.1.17
hCoV-19/USA/CA-CDC-ASC210546422/2022	BA.1.15
hCoV-19/USA/OK-CDC-ASC210689382/2022	BA.1.1
hCoV-19/USA/RI-CDC-ASC210647869/2022	BA.1.1
hCoV-19/Slovenia/149618/2022	BA.1.1
hCoV-19/Slovenia/154033/2022	BA.1.1
hCoV-19/Slovenia/148628/2022	BA.1.1
hCoV-19/Slovenia/107841/2022	BA.1.1.3
hCoV-19/USA/WI-CDC-LC0519016/2022	BA.1.1
hCoV-19/Estonia/RC0366383/2022	BA.1.1
hCoV-19/SouthAfrica/NICD-N33410/2022	BA.2
hCoV-19/SouthAfrica/NICD-N33519/2022	BA.2
hCoV-19/Romania/IS-7317/2022	BA.1
hCoV-19/Romania/MS-6456/2022	BA.1.17
hCoV-19/USA/PA-CDC-LC0517217/2022	BA.1
hCoV-19/Qatar/QA-QU-18-34-B2/2021	BA.2
hCoV-19/Spain/CT-HUVH-E536902/2022	BA.1.1
hCoV-19/Bonaire/BQ-RIVM-81219/2022	BA.1.1
hCoV-19/Bonaire/BQ-RIVM-80942/2021	BA.1.1
hCoV-19/Bonaire/BQ-RIVM-80958/2021	BA.1
hCoV-19/AmericanSamoa/AS-CDC-2-5343532/2021	BA.1.1
hCoV-19/Netherlands/UT-RIVM-81787/2022	BA.1.17
hCoV-19/Norway/33045/2021	BA.1.15
hCoV-19/Tunisia/S1579/2021	BA.1
hCoV-19/Mexico/QUE_InDRE_FB53986_E_S10060/2021	BA.1
hCoV-19/Sweden/01_SE100_22CS100528/2022	BA.2
hCoV-19/USA/NV-CDC-LC0469477/2021	BA.1
hCoV-19/Singapore/812/2022	BA.2
hCoV-19/USA/MA-CDCBI-CRSP_46IA5M67G6KAMZAJ/2022	BA.1.1
hCoV-19/England/MILK-330F75B/2022	BA.1.1
hCoV-19/USA/TX-CDC-ASC210562904/2021	BA.1.15
hCoV-19/Turkey/HSGM-F18378/2022	BA.1
hCoV-19/TrinidadandTobago/126876/2022	BA.1.15
hCoV-19/Mexico/COL_InDRE_FB757_E06313447264_S10556/2022	BA.1.1
hCoV-19/Mexico/MEX-INMEGEN-49-180/2021	BA.1.17
hCoV-19/Cambodia/901192/2022	BA.1.1
hCoV-19/Denmark/DCGC-368158/2022	BA.2
hCoV-19/SaudiArabia/KFSHRC_0125Y/2021	BA.1.1
hCoV-19/Canada/MB-NML-260515-2B/2021	BA.1.14
hCoV-19/Canada/MB-NML-260515-2A/2021	BA.1.14
hCoV-19/USA/VT-CDCBI-CRSP_KANENFVPOCJ6KXTM/2022	BA.1.1
hCoV-19/USA/VT-CDCBI-CRSP_IUOBWXGOEIPH3HYL/2022	BA.1
hCoV-19/USA/VT-CDCBI-CRSP_G6K24J6FJIWKFRKR/2022	BA.1.1
hCoV-19/Brunei/7121302361/2021	BA.1.17
hCoV-19/Turkey/HSGM-F18943/2022	BA.1
hCoV-19/Mexico/SIN-INMEGEN-51-206/2021	BA.1.1
hCoV-19/Mexico/MOR_InDRE_FB1262_E17313481507_S10850/2022	BA.1.1
hCoV-19/Mexico/HID_InDRE_FB1015_E13313653254_S10815/2022	BA.1.15
hCoV-19/USA/OH-CDC-MMB13366794/2022	BA.1.1
hCoV-19/Australia/ACT2698/2022	BA.1.17
hCoV-19/Australia/ACT2660/2022	BA.1.17
hCoV-19/SriLanka/aicbu3780/2022	BA.1.1
hCoV-19/Bermuda/WR-NYGC-DEC-6130-LSCW531/2021	BA.1
hCoV-19/Bermuda/WR-NYGC-DEC-6142-TBKO909/2021	BA.1
hCoV-19/USA/KS-KHEL-9928/2022	BA.1
hCoV-19/NewZealand/22CV0962/2022	BA.1.1.9
hCoV-19/NewZealand/22CH0622/2022	BA.1
hCoV-19/NewZealand/22CH0665/2022	BA.1.1.9
hCoV-19/Sweden/SUS0008029/2022	BA.1
hCoV-19/USA/AS-H227813/2022	BA.1.1
hCoV-19/USA/MO-CDC-ASC210648641/2022	BA.1.15
hCoV-19/Mexico/SON_InDRE_FB6162_E26313999449_S11352/2022	BA.1
hCoV-19/Mexico/SIN_InDRE_FB7804_E25114473428_S11373/2022	BA.1.1
hCoV-19/Mexico/SLP_InDRE_FB5002_E24113981648_S11555/2022	BA.1.1
hCoV-19/Mexico/NAY_InDRE_FB4815_E18114073741_S11536/2022	BA.1
hCoV-19/Mexico/BCN_InDRE_FB6024_E02313916383_S11329/2022	BA.1.1
hCoV-19/France/PDL-IPP52710/2021	BA.1
hCoV-19/Honduras/LNV490639-ICGES/2022	BA.1.1
hCoV-19/Luxembourg/LNS3230524/2021	BA.1.17
hCoV-19/SriLanka/aicbu4725/2022	BA.2
hCoV-19/USA/WV-CDC-ASC210650053/2022	BA.1.1
hCoV-19/Singapore/1151/2022	BA.2
hCoV-19/Belgium/AZDelta-2202-24071/2022	BA.1
hCoV-19/Mexico/MOR_LANGEBIO_IMSS_5742/2022	BA.1
hCoV-19/Eswatini/N22779/2021	BA.1
hCoV-19/Eswatini/N22796/2021	BA.1
hCoV-19/Eswatini/N22771/2021	BA.1
hCoV-19/Canada/SK-RRPL-307918/2021	BA.1.17
hCoV-19/Colombia/PUT-IAVH-VG-15178/2022	BA.1.1
hCoV-19/SouthAfrica/NICD-N23881/2021	BA.1.17
hCoV-19/Romania/IS-1135/2022	BA.1
hCoV-19/Australia/WA935/2022	BA.1.17
hCoV-19/Nigeria/CV4816/2021	BA.1.1
hCoV-19/Namibia/N25884/2021	BA.1
hCoV-19/Mexico/GUA_IBT_IMSS_5411/2021	BA.1.15
hCoV-19/Mexico/QUE_IBT_IMSS_5622/2022	BA.1.15
hCoV-19/USA/MD-HP24489-PIDBZBHZDB/2022	BA.1.1
hCoV-19/Estonia/RC0277688/2021	BA.1.1
hCoV-19/Mexico/HID_IBT_IMSS_5302/2021	BA.1
hCoV-19/Botswana/R66B87_BHP_927868/2021	BA.1
hCoV-19/Bulgaria/22BG-NC_014560_R25/2022	BA.1.10
hCoV-19/Namibia/N25887/2021	BA.1
hCoV-19/Jordan/Biolab0469/2022	BA.2.3
hCoV-19/NewZealand/21CH1034/2021	BA.1
hCoV-19/NewZealand/22CH0307/2022	BA.1.1
hCoV-19/USA/SC-CDC-LC0453463/2021	BA.1.1
hCoV-19/USA/DE-CDC-LC0454541/2021	BA.1.1
hCoV-19/Serbia/Smederevska_Palanka-419948_2101/2022	BA.1.1
hCoV-19/Serbia/Belgrade-419537_2101/2022	BA.1
hCoV-19/Bulgaria/22BG-NC_014467_R24/2022	BA.1.17
hCoV-19/Paraguay/326257/2021	BA.1.1
hCoV-19/Paraguay/323697/2021	BA.1.1
hCoV-19/Botswana/R62B76_BHP_AAC48864/2021	BA.1
hCoV-19/Botswana/R62B85_BHP_AAC48844/2021	BA.1
hCoV-19/Botswana/R63B49_BHP_121160783/2021	BA.1.1
hCoV-19/Cambodia/902544/2022	BA.1.1
hCoV-19/SouthAfrica/NICD-N23337/2021	BA.1
hCoV-19/Chile/RM-198146/2021	BA.1.1
hCoV-19/Guadeloupe/IPP03723/2022	BA.1
hCoV-19/Brazil/ES-FIOCRUZ-66479/2021	BA.1
hCoV-19/Brazil/RJ-FIOCRUZ-66419/2021	BA.1
hCoV-19/CostaRica/INC-2660-728256/2022	BA.1.17
hCoV-19/Bulgaria/22BG-NC_015705_R26/2022	BA.1.1
hCoV-19/USA/SC-CDC-LC0495617/2022	BA.1.1
hCoV-19/USA/WV-CDC-LC0499085/2022	BA.1.1
hCoV-19/Australia/VIC32664/2021	BA.1.17
hCoV-19/USA/WI-CDC-FG-235760/2021	BA.1.1
hCoV-19/Philippines/PH-RITM-808/2021	BA.2.3
hCoV-19/NewZealand/21CV3871/2021	BA.1.15
hCoV-19/CostaRica/INC-2474-725049/2021	BA.1.1
hCoV-19/CostaRica/INC-2534-726216/2021	BA.1.1
hCoV-19/CostaRica/INC-2458-724802/2021	BA.1.15
hCoV-19/Pakistan/NIH-B33-S13/2022	BA.1.17
hCoV-19/Chile/LI-197095/2021	BA.1.1
hCoV-19/USA/WY-CDC-QDX32456597/2021	BA.1.1
hCoV-19/Netherlands/NB-MVD-CWGS2200264/2022	BA.1
hCoV-19/Curacao/CW-RIVM-82561/2022	BA.1.15
hCoV-19/Curacao/CW-RIVM-82550/2022	BA.1.15
hCoV-19/Colombia/DC-UNIANDES-G033286/2021	BA.1.1
hCoV-19/Mexico/PUE-VE22-5440-LABOPAT/2022	BA.1.1
hCoV-19/USA/TX-CDC-QDX32302885/2021	BA.1.15
hCoV-19/Aruba/AW-RIVM-82609/2022	BA.1.1
hCoV-19/Aruba/AW-RIVM-82600/2022	BA.1.1
hCoV-19/Aruba/AW-RIVM-82603/2022	BA.1
hCoV-19/Bonaire/BQ-RIVM-82742/2022	BA.1.15
hCoV-19/Bonaire/BQ-RIVM-82749/2022	BA.1.1
hCoV-19/Zimbabwe/S_3115_B61/2021	BA.1.17
hCoV-19/Aruba/AW-RIVM-82592/2022	BA.1.15
hCoV-19/Bonaire/BQ-RIVM-82764/2022	BA.1
hCoV-19/Georgia/Tb-sNGS3057/2022	BA.1.1
hCoV-19/Colombia/VAC-INS-VG-11987/2021	BA.1.1
hCoV-19/Colombia/DC-LSPSDS-VG-41704/2021	BA.1.17
hCoV-19/HongKong/VM21048486/2021	BA.2.3
hCoV-19/USA/AL-CDC-ASC210584433/2022	BA.1.1
hCoV-19/USA/MA-CDCBI-CRSP_LRUAPBMULEOAQ54K/2022	BA.1.1
hCoV-19/USA/WA-PHL-012164/2021	BA.1.1
hCoV-19/Argentina/INEI117194/2022	BA.1.17
hCoV-19/Argentina/INEI117446/2022	BA.1
hCoV-19/Argentina/INEI117248/2021	BA.1.1
hCoV-19/Argentina/INEI116306/2021	BA.1.17
hCoV-19/Argentina/INEI117206/2021	BA.1.1
hCoV-19/SouthKorea/KDCA26119/2021	BA.1.1.5
hCoV-19/SouthKorea/KDCA26207/2021	BA.1
hCoV-19/USA/HI-CDC-LC0483069/2022	BA.1.1
hCoV-19/Peru/LIM-INS-11289/2021	BA.1.15
hCoV-19/USA/UT-CDC-LC0456188/2021	BA.1.15
hCoV-19/USA/MO-CDC-ASC210573731/2021	BA.1.1
hCoV-19/Australia/NSW-ICPMR-19575/2022	BA.1.17
hCoV-19/Ireland/LH-NVRL-S21IRL00604084/2021	BA.1.17
hCoV-19/Mexico/ROO-INMEGEN-52-120/2022	BA.1.1
hCoV-19/Mexico/OAX-INMEGEN-52-131/2022	BA.1.15
hCoV-19/Mexico/OAX-INMEGEN-52-135/2022	BA.1.15
hCoV-19/USA/IA-SHL-2005554/2022	BA.1.1
hCoV-19/Tanzania/JXCDC-09/2021	BA.1.1
hCoV-19/Tanzania/JXCDC-10/2021	BA.1.1
hCoV-19/Japan/PG-178309/2022	BA.1.1.2
hCoV-19/Canada/BC-BCCDC-308302/2021	BA.1
hCoV-19/Myanmar/DSMRC-066/2022	BA.2.3
hCoV-19/Myanmar/DSMRC-067/2022	BA.1.1
hCoV-19/Japan/PG-175421/2021	BA.1.1.2
hCoV-19/Ecuador/NIC-INSPI-377795/2022	BA.1
hCoV-19/Norway/OUS-19511/2022	BA.2
hCoV-19/USA/AK-PHL16676/2021	BA.1.15
hCoV-19/Canada/NL-PHML-296845/2021	BA.1.1
hCoV-19/AntiguaandBarbuda/114018/2021	BA.1.1
hCoV-19/Mexico/AGU_ISSEA-Lesp-5006-S11/2022	BA.1.1
hCoV-19/Australia/WA1023/2022	BA.1.1
hCoV-19/CostaRica/INC-2805-735081/2022	BA.1.1
hCoV-19/CostaRica/INC-2823-736333/2022	BA.1.1
hCoV-19/USA/AZ-ASPHL-0133/2022	BA.1
hCoV-19/Denmark/DCGC-336125/2022	BA.2
hCoV-19/Andorra/AND-244_213641396801_COV-GC/2021	BA.1.15
hCoV-19/Sweden/6232872076/2022	BA.2
hCoV-19/Switzerland/un-HUG-36931982/2022	BA.1.1.1
hCoV-19/USA/TX-HMH-MCoV-72054/2021	BA.1.15
hCoV-19/Iraq/CPHL-180122-22/2022	BA.1.1
hCoV-19/Mexico/CMX-INMEGEN-51-90/2022	BA.1.15
hCoV-19/Norway/40/2022	BA.1
hCoV-19/SaudiArabia/KFSHRC_0111Y/2021	BA.1.1
hCoV-19/Argentina/INEI118199/2022	BA.1
hCoV-19/Argentina/INEI118134/2022	BA.1.1
hCoV-19/France/NOR-HMN-22012250130/2022	BA.1.1
hCoV-19/Mexico/CHP-INMEGEN-54-278/2022	BA.1.1
hCoV-19/Austria/LB-R00057-S049/2022	BA.2
hCoV-19/Austria/LB-R00057-S112/2022	BA.2
hCoV-19/Maldives/MAV108646/2022	BA.1.1
hCoV-19/Australia/NSW-ICPMR-19962/2022	BA.1.17
hCoV-19/Taiwan/TSGH-49/2021	BA.1
hCoV-19/Netherlands/ZH-RIVM-83875/2022	BA.1.1
hCoV-19/Curacao/CW-RIVM-85364/2022	BA.1.1
hCoV-19/Bonaire/BQ-RIVM-85186/2022	BA.1.1
hCoV-19/Curacao/CW-RIVM-84060/2022	BA.1
hCoV-19/CostaRica/INC-2783-734509/2022	BA.1.15
hCoV-19/CostaRica/INC-2758-731140/2022	BA.1.17
hCoV-19/CostaRica/INC-2789-734526/2022	BA.1.1
hCoV-19/Portugal/PT25757/2022	BA.1.17
hCoV-19/TrinidadandTobago/120274/2022	BA.1.1
hCoV-19/USA/ME-HETL-J11803/2022	BA.1
hCoV-19/Guadeloupe/CERBAHC-12335847/2021	BA.1.1.1
hCoV-19/Oman/5221029/2022	BA.1.1
hCoV-19/Oman/5221024/2022	BA.2
hCoV-19/England/LSPA-349BED6/2022	BA.1.17
hCoV-19/Guinea/LFHVG-G0509/2021	BA.1.16
hCoV-19/Guinea/LFHVG-G0508/2021	BA.1.15.1
hCoV-19/Mexico/BCS_IBT_IMSS_6129/2022	BA.1
hCoV-19/Mexico/VER_LANGEBIO_IMSS_5432/2022	BA.1.1
hCoV-19/Mexico/CAM_LANGEBIO_IMSS_5307/2022	BA.1.1
hCoV-19/Mexico/PUE_LANGEBIO_IMSS_5344/2022	BA.1.1
hCoV-19/DRC/INRB-RDC-793/2021	BA.1
hCoV-19/DRC/INRB-RDC-791/2021	BA.1.1
hCoV-19/CostaRica/INC-3012-741255/2022	BA.1.1
hCoV-19/CostaRica/INC-3013-741256/2022	BA.1.1
hCoV-19/Australia/VIC37718/2022	BA.1.17.1
hCoV-19/Paraguay/367482/2022	BA.1.1
hCoV-19/Paraguay/410369/2022	BA.1.1
hCoV-19/Paraguay/410443/2022	BA.1.15
hCoV-19/Paraguay/410465/2022	BA.1.1
hCoV-19/Paraguay/410504/2022	BA.1.1
hCoV-19/Paraguay/410479/2022	BA.1.1
hCoV-19/Paraguay/410474/2022	BA.1.1
hCoV-19/Paraguay/410500/2022	BA.1.1
hCoV-19/Australia/VIC37768/2022	BA.1.17
hCoV-19/Brazil/RJ-LNN07800/2021	BA.1.1
hCoV-19/SouthAfrica/NICD-N34325/2022	BA.2
hCoV-19/USA/GA-CDC-MMB12563377/2021	BA.1.1
hCoV-19/Mexico/TAM-INMEGEN-53-179/2022	BA.1.15
hCoV-19/Philippines/PH-PGC-104094/2022	BA.2.3
hCoV-19/CzechRepublic/UMTM390620/2021	BA.1
hCoV-19/Philippines/PH-PGC-104085/2022	BA.2.3
hCoV-19/USA/OK-CDC-LC0488052/2022	BA.1.15
hCoV-19/USA/MO-CDC-LC0489685/2022	BA.1.15
hCoV-19/Canada/ON-PHL-22-04188/2021	BA.1
hCoV-19/Italy/ABR-IZSGC-2022TE907/2021	BA.1.17
hCoV-19/USA/IA-SHL-2022399/2022	BA.1
hCoV-19/Bangladesh/icddrb-GSB03-186/2022	BA.2
hCoV-19/Colombia/VAC-INS-VG-13398/2022	BA.1.1
hCoV-19/USA/GA-CDC-STM-SXDCD2JUK/2022	BA.1.15
hCoV-19/Eswatini/N28421/2021	BA.1
hCoV-19/Spain/CT-HUGTiPM074SV9B9/2022	BA.1.14
hCoV-19/USA/VA-CDC-QDX32791434/2022	BA.1
hCoV-19/Eswatini/N28514/2021	BA.1.1
hCoV-19/USA/NJ-CDC-QDX32887052/2022	BA.1.1
hCoV-19/Kosovo/CO-00634-XXK000_03_01_Prolab/2021	BA.1
hCoV-19/Cambodia/VIR22-003268/2022	BA.2.3
hCoV-19/Croatia/24227/2022	BA.1.1.10
hCoV-19/Finland/THL-202200550/2022	BA.1.1
hCoV-19/Denmark/DCGC-356201/2022	BA.2
hCoV-19/Australia/WA1194/2022	BA.1.17
hCoV-19/USA/CA-SEARCH-115845/2021	BA.1.15
hCoV-19/Belgium/Jessa_11-2205-000995LKO/2022	BA.1.1.11
hCoV-19/Chile/LI-17158/2022	BA.1.1
hCoV-19/Chile/CO-17766/2022	BA.1.1
hCoV-19/Luxembourg/LNS2880709/2022	BA.1.1
hCoV-19/Switzerland/AG-SRO-500007_6962/2022	BA.1.1.3
hCoV-19/Hungary/mbl_02087/2022	BA.1.17
hCoV-19/Hungary/mbl_01419/2022	BA.1
hCoV-19/Hungary/mbl_01254/2022	BA.1.1
hCoV-19/Rwanda/NRLNAT4325/2021	BA.1
hCoV-19/Rwanda/NRLNAT4299/2022	BA.1.1
hCoV-19/Rwanda/NRLNAT4312/2021	BA.1
hCoV-19/Rwanda/NRLNAT4316/2021	BA.1.13
hCoV-19/Rwanda/NRLNAT4271/2021	BA.1.1
hCoV-19/Rwanda/NRLNAT4321/2022	BA.1
hCoV-19/Rwanda/NRLNAT4333/2022	BA.1.17
hCoV-19/Rwanda/NRLNAT4306/2022	BA.1
hCoV-19/Poland/PZH-GUM-12082/2022	BA.1
hCoV-19/Peru/ARE-UNSA-1270/2022	BA.1.1
hCoV-19/Germany/BY-RKI-I-520459/2022	BA.1.1.1
hCoV-19/Qatar/QA.QU.18.38.D4/2022	BA.2
hCoV-19/Qatar/QA.QU.18.36.F1/2022	BA.2
hCoV-19/Maldives/MAV98338/2022	BA.1.1
hCoV-19/Kenya/ILRI_COVM02667/2022	BA.1.1
hCoV-19/Kenya/ILRI_COVM02671/2022	BA.1.1
hCoV-19/Turkey/HSGM-G947/2022	BA.1
hCoV-19/Australia/WA1432/2022	BA.1.17
hCoV-19/Ireland/D-NVRL-G22IRL05155/2021	BA.1
hCoV-19/Australia/NSW-ICPMR-20611/2022	BA.1.1
hCoV-19/Australia/NSW-ICPMR-20721/2022	BA.1.17
hCoV-19/Sweden/SUS0009642/2022	BA.2
hCoV-19/USA/WI-CDC-ASC210604399/2022	BA.1.1
hCoV-19/USA/KY-CDC-ASC210539753/2022	BA.1.1
hCoV-19/USA/GA-CDC-ASC210643410/2022	BA.1.1
hCoV-19/Turkey/HSGM-G1326/2022	BA.1
hCoV-19/Portugal/PT27932/2022	BA.1.1
hCoV-19/Andorra/AND-254_220331370901_COV-GC/2022	BA.1.15
hCoV-19/Norway/Ahus-3153/2022	BA.2
hCoV-19/Portugal/PT28039/2022	BA.1
hCoV-19/Portugal/PT27888/2022	BA.1
hCoV-19/Spain/IB-HUSE-04182/2022	BA.1
hCoV-19/Indonesia/JB-GS-WJHL-ITB-L75792/2022	BA.2
hCoV-19/Syria/Northwest-0118/2022	BA.1.1
hCoV-19/Finland/THL-202206041/2022	BA.1.1
hCoV-19/Greece/10176/2022	BA.1.1.13
hCoV-19/Greece/328159/2022	BA.1.1
hCoV-19/Greece/328300/2022	BA.1
hCoV-19/Greece/9723/2022	BA.1
hCoV-19/Greece/10058/2022	BA.1.1
hCoV-19/Guadeloupe/CERBAHC-02150489/2022	BA.1.1
hCoV-19/Australia/QLD4180/2021	BA.1.17
hCoV-19/Zambia/CHAZ-CHS1571/2022	BA.2
hCoV-19/Zambia/CHAZ-CHS1648/2022	BA.1.14
hCoV-19/Zambia/CHAZ-CHS1640/2022	BA.2
hCoV-19/Finland/THL-202206039/2022	BA.1.1
hCoV-19/HongKong/VM21048489/2021	BA.2.3
hCoV-19/England/LSPA-3500A13/2022	BA.1
hCoV-19/HongKong/CM22000271/2022	BA.1.1
hCoV-19/NewZealand/22CV1281/2022	BA.1.1.9
hCoV-19/USA/IL-RIPHL_90157_G/2022	BA.1
hCoV-19/NewZealand/22CV0932/2022	BA.1.17
hCoV-19/France/IDF-HMN-22012260110/2022	BA.1
hCoV-19/USA/OR-CDC-QDX33118462/2022	BA.1.1
hCoV-19/Mexico/SIN_CIAD-MZT_S8657/2022	BA.1.1
hCoV-19/Mexico/AGU-ISSEA-Lesp-13847-S18/2022	BA.1.1
hCoV-19/U.S.VirginIslands/VI-CDC-2-5489026/2022	BA.1.1
hCoV-19/Finland/THL-202202621/2022	BA.1.1
hCoV-19/SouthAfrica/NICD-N29060/2021	BA.1
hCoV-19/SouthAfrica/NICD-N32509/2021	BA.1
hCoV-19/NewZealand/22CH0840/2022	BA.1.17
hCoV-19/Guadeloupe/IPP05403/2022	BA.1
hCoV-19/Finland/THL-202206173/2022	BA.1.1
hCoV-19/Venezuela/Mir176/2022	BA.1.1
hCoV-19/Lithuania/LTU000_INMEDICA_1045618/2022	BA.1
hCoV-19/Lithuania/LTU000_RSL_COV108722/2021	BA.1
hCoV-19/Germany/BE-ChVir-LB-220218-4611/2022	BA.2
hCoV-19/Italy/CAM-TIGEM-IZSM-COLLI-26377/2022	BA.1.1
hCoV-19/Argentina/PAIS-G0869/2022	BA.1.15
hCoV-19/Argentina/PAIS-G0878/2022	BA.1.1
hCoV-19/Argentina/PAIS-G0882/2022	BA.1.1
hCoV-19/CzechRepublic/NAT-22-17250/2022	BA.1.1
hCoV-19/Australia/SA117850/2022	BA.1.1
hCoV-19/Australia/SA117854/2022	BA.1.17.1
hCoV-19/USA/CO-CDPHE-2102907061/2022	BA.1.1
hCoV-19/Peru/LIM-UPCH-2879/2022	BA.1.1
hCoV-19/Macedonia/6091/2022	BA.1.1
hCoV-19/Macedonia/6199/2022	BA.1.1
hCoV-19/Macedonia/7327/2022	BA.1.17
hCoV-19/Macedonia/6299/2022	BA.1.1.11
hCoV-19/Macedonia/5856/2022	BA.1.1
hCoV-19/Australia/QLD30907/2022	BA.1.17
hCoV-19/Australia/QLD38892/2022	BA.1.17
hCoV-19/Australia/QLD33679/2022	BA.1.17
hCoV-19/Australia/WA1461/2022	BA.1.17
hCoV-19/France/ARA-CHUGA-2020187512/2022	BA.1
hCoV-19/Belgium/AZDelta-2207-08562/2022	BA.1.1.1
hCoV-19/USA/NV-CDC-LC0536501/2022	BA.1.1
hCoV-19/USA/AL-CDC-LC0532502/2022	BA.1.1
hCoV-19/USA/MO-CDC-LC0535375/2022	BA.2.3
hCoV-19/USA/DC-CDC-LC0531775/2022	BA.1
hCoV-19/USA/NM-CDC-LC0537936/2022	BA.1.1
hCoV-19/USA/AK-CDC-LC0538103/2022	BA.1.1
hCoV-19/USA/WI-CDC-ASC210699518/2022	BA.1.1
hCoV-19/Switzerland/BL-ETHZ-36233249/2022	BA.1.1.1
hCoV-19/USA/NM-CDC-IBX314526322763/2022	BA.1.1
hCoV-19/Japan/RB22-001-64/2022	BA.1.1.2
hCoV-19/Japan/RB22-001-70/2022	BA.1.1.2
hCoV-19/Moldova/Nr-7826/2022	BA.1.1
hCoV-19/Moldova/Nr-10380/2022	BA.1.1
hCoV-19/Moldova/Nr-12177/2022	BA.1.17
hCoV-19/Moldova/Nr-16816/2022	BA.2
hCoV-19/Italy/SIC-CQRC-22018139/2022	BA.2
hCoV-19/Belize/8734379-ICGES/2021	BA.1.1
hCoV-19/Belize/8734304-ICGES/2021	BA.1.1
hCoV-19/Belize/8735198-ICGES/2022	BA.1
hCoV-19/Australia/QLD0x00C6A1/2022	BA.1.17
hCoV-19/Australia/QLD0x00C5A7/2022	BA.1.17
hCoV-19/Australia/QLD0x00C71D/2022	BA.1.17
hCoV-19/India/KA-CBR-1402PRED015/2022	BA.2
hCoV-19/Guinea/IPG-25886/2021	BA.1.15
hCoV-19/Guinea/IPG-26010/2022	BA.1
hCoV-19/Cambodia/g0215171/2022	BA.2
hCoV-19/Pakistan/NIH-B36-S11/2022	BA.2
hCoV-19/Pakistan/NIH-B36-S13/2022	BA.2
hCoV-19/Lithuania/LTU000_RSL_11594807/2022	BA.1
hCoV-19/Lithuania/LTU000_INMEDICA_1168718/2022	BA.2
hCoV-19/Thailand/CONI-2089/2022	BA.1.1
hCoV-19/USA/CO-CDC-MMB14081540/2022	BA.1.1
hCoV-19/Canada/AB-ABPHL-53321/2022	BA.1
hCoV-19/USA/NE-NPHL22-12575/2022	BA.1.15
hCoV-19/USA/DC-CDC-QDX33632485/2022	BA.1.1
hCoV-19/Mexico/TAB-INMEGEN-59-230/2022	BA.1
hCoV-19/USA/NJ-CDC-ASC210697526/2022	BA.1.1.16
hCoV-19/USA/AR-CDC-ASC210548487/2022	BA.1.1
hCoV-19/USA/LA-CDC-ASC210700678/2022	BA.1.1
hCoV-19/Ghana/WACCBIP-GS2054/2021	BA.1
hCoV-19/Ghana/WACCBIP-GS2194/2021	BA.1
hCoV-19/Ghana/WACCBIP-GS2411/2021	BA.1
hCoV-19/Spain/MD-HGUGM-6411124/2022	BA.2
hCoV-19/Bonaire/BQ-RIVM-87375/2022	BA.1
hCoV-19/Bonaire/BQ-RIVM-87377/2022	BA.1.1
hCoV-19/Bonaire/BQ-RIVM-87378/2022	BA.1.1
hCoV-19/Bonaire/BQ-RIVM-87379/2022	BA.1
hCoV-19/Bonaire/BQ-RIVM-87380/2022	BA.1.1
hCoV-19/Curacao/CW-RIVM-87882/2022	BA.1.1
hCoV-19/Curacao/CW-RIVM-87885/2022	BA.1.1
hCoV-19/Curacao/CW-RIVM-87887/2022	BA.1
hCoV-19/Curacao/CW-RIVM-88429/2022	BA.1.1
hCoV-19/Netherlands/UT-RIVM-87756/2022	BA.1.1
hCoV-19/Canada/MB-CPL-350827/2022	BA.1.14
hCoV-19/Canada/MB-CPL-350854/2022	BA.1
hCoV-19/Canada/MB-CPL-346432/2022	BA.2.3
hCoV-19/SouthKorea/KDCA29442/2022	BA.1.1
hCoV-19/SouthKorea/KDCA29756/2022	BA.1.1
hCoV-19/Norway/5480/2022	BA.1
hCoV-19/Guadeloupe/IPP10464/2022	BA.1.1
hCoV-19/Saint-Martin/IPP10706/2022	BA.1.1
hCoV-19/Canada/SK-NML-348144/2022	BA.1.1
hCoV-19/Norway/6571/2022	BA.2
hCoV-19/Norway/7285/2022	BA.2
hCoV-19/USA/IL-S22WGS872/2022	BA.1.1
hCoV-19/USA/CO-CDC-ASC210552826/2022	BA.1.1
hCoV-19/USA/MI-CDC-STM-6MVYBEG86/2022	BA.1.15
hCoV-19/CostaRica/INC-3031-741563/2022	BA.1.1
hCoV-19/CostaRica/INC-3047-741959/2022	BA.1.1
hCoV-19/CostaRica/INC-3048-742286/2022	BA.1.1
hCoV-19/CostaRica/INC-3071-742489/2022	BA.1
hCoV-19/CostaRica/INC-3077-742531/2022	BA.1.15
hCoV-19/FrenchGuiana/IPG202200285/2022	BA.1.17
MN996532.2 Bat coronavirus RaTG13, complete genome	A
hCoV-19/Russia/MOW-Moscow_PMVL-O11/2021	BA.1
hCoV-19/Russia/MOW-Moscow_PMVL-O16/2021	BA.1
hCoV-19/Russia/SPE-RII-MH44356S/2021	BA.1.15
hCoV-19/Russia/SPE-RII-5921S/2021	BA.1.1
hCoV-19/Russia/SPE-RII-5922S/2021	BA.1.1
hCoV-19/Russia/SPE-RII-5994S/2021	BA.1.1
hCoV-19/Russia/SPE-RII-6072S/2021	BA.1.1
hCoV-19/Russia/SPE-RII-6075S/2021	BA.1.1
hCoV-19/Russia/SPE-RII-6081S/2021	BA.1.1
hCoV-19/Russia/SPE-RII-6086S/2021	BA.1.1
hCoV-19/Russia/SPE-RII-6090S/2021	BA.1.1
hCoV-19/Russia/SPE-RII-6091S/2021	BA.1.1
hCoV-19/Russia/SPE-RII-6094S/2021	BA.1.1
hCoV-19/Russia/SPE-RII-6100S/2021	BA.1.1
hCoV-19/Russia/SPE-RII-6101S/2021	BA.1.1
hCoV-19/Russia/SPE-RII-6168S/2021	BA.1.1
hCoV-19/Russia/SPE-RII-6169S/2021	BA.1.1
hCoV-19/Russia/SPE-RII-6196S/2021	BA.1.1
hCoV-19/Russia/SPE-RII-6199S/2021	BA.1.1
hCoV-19/Russia/SPE-RII-6202S/2021	BA.1.1
hCoV-19/Russia/SPE-RII-6212S/2021	BA.1.1
hCoV-19/Russia/SPE-RII-6222S/2021	BA.1.1
hCoV-19/Russia/SPE-RII-6236S/2021	BA.1.1
hCoV-19/Russia/SPE-RII-6243S/2021	BA.1.1
hCoV-19/Russia/SPE-RII-6293S/2021	BA.1.1
hCoV-19/Russia/ROS-RII-MH45748S/2021	BA.1.1
hCoV-19/Russia/SPE-RII-6370S/2021	BA.1
hCoV-19/Russia/SPE-RII-5921V1/2021	BA.1.1
hCoV-19/Russia/SPE-RII-6086V1/2021	BA.1.1
hCoV-19/Russia/SPE-RII-6236V1/2021	BA.1.1
hCoV-19/Russia/SPE-RII-6243V1/2021	BA.1.1
hCoV-19/Russia/SPE-RII-6293V1/2021	BA.1.1
hCoV-19/Russia/SPE-RII-6078S/2021	BA.1.1
hCoV-19/Russia/SPE-RII-6522S/2021	BA.1.1
hCoV-19/Russia/SPE-RII-6542S/2021	BA.1.1
hCoV-19/Russia/SPE-RII-6868S/2021	BA.1.1
hCoV-19/Russia/SPE-RII-7001S/2021	BA.1.1
hCoV-19/Russia/SPE-RII-7039S/2021	BA.1.1
hCoV-19/Russia/SPE-RII-7041S/2021	BA.1.1
hCoV-19/Russia/SPE-RII-7048S/2021	BA.1.1
hCoV-19/Russia/SPE-RII-7059S/2021	BA.1.1
hCoV-19/Russia/SPE-RII-7060S/2021	BA.1.1
hCoV-19/Russia/SPE-RII-7070S/2021	BA.1.1
hCoV-19/Russia/SPE-RII-7076S/2021	BA.1.1
hCoV-19/Russia/SPE-RII-7101S/2021	BA.1.1
hCoV-19/Russia/SPE-RII-7127S/2021	BA.1.1
hCoV-19/Russia/SPE-RII-7141S/2021	BA.1.1
hCoV-19/Russia/SPE-RII-7142S/2021	BA.1.1
hCoV-19/Russia/SPE-RII-7152S/2021	BA.1.1
hCoV-19/Russia/SPE-RII-7178S/2021	BA.1
hCoV-19/Russia/SPE-RII-7379S/2021	BA.1.1
hCoV-19/Russia/SPE-RII-7384S/2021	BA.1.1
hCoV-19/Russia/SPE-RII-7412S/2021	BA.1.1
hCoV-19/Russia/SPE-RII-7413S/2021	BA.1.1
hCoV-19/Russia/SPE-RII-7483S/2021	BA.1.1
hCoV-19/Russia/SPE-RII-7491S/2021	BA.1.1
hCoV-19/Russia/SPE-RII-7504S/2021	BA.1.1
hCoV-19/Russia/SPE-RII-7509S/2021	BA.1.1
hCoV-19/Russia/SPE-RII-7539S/2021	BA.1.1
hCoV-19/Russia/SPE-RII-7547S/2021	BA.1.1
hCoV-19/Russia/SPE-RII-MH45905S/2021	BA.1.15.1
hCoV-19/Russia/SPE-RII-MH45921S/2021	BA.1.15
hCoV-19/Russia/SPE-RII-MH46106S/2021	BA.1.1
hCoV-19/Russia/SPE-RII-MH46488S/2021	BA.1.1
hCoV-19/Russia/SPE-RII-MH46489S/2021	BA.1.1
hCoV-19/Russia/SPE-RII-MH46492S/2021	BA.1.1
hCoV-19/Russia/SPE-RII-MH46503S/2021	BA.1.1
hCoV-19/Russia/SPE-RII-MH46507S/2021	BA.1.1
hCoV-19/Russia/SPE-RII-MH46625S/2021	BA.1.17
hCoV-19/Russia/SPE-RII-MH46847S/2021	BA.1.1
hCoV-19/Russia/SPE-RII-MH46850S/2021	BA.1.1
hCoV-19/Russia/SPE-RII-MH46852S/2021	BA.1.1
hCoV-19/Russia/SPE-RII-MH46855S/2021	BA.1.1
hCoV-19/Russia/SPE-RII-MH46856S/2021	BA.1.1
hCoV-19/Russia/SPE-RII-MH46857S/2021	BA.1.1
hCoV-19/Russia/SPE-RII-MH46858S/2021	BA.1.1
hCoV-19/Russia/SPE-RII-MH46859S/2021	BA.1.1
hCoV-19/Russia/SPE-RII-MH46861S/2021	BA.1.1
hCoV-19/Russia/SPE-RII-MH46863S/2021	BA.1.1
hCoV-19/Russia/SPE-RII-MH46864S/2021	BA.1.1
hCoV-19/Russia/SPE-RII-MH46865S/2021	BA.1.1
hCoV-19/Russia/SPE-RII-MH46869S/2021	BA.1.1
hCoV-19/Russia/SPE-RII-MH46870S/2021	BA.1.1
hCoV-19/Russia/SPE-RII-MH46951S/2021	BA.1
hCoV-19/Russia/SPE-RII-MH46964S/2021	BA.1
hCoV-19/Russia/SPE-RII-MH47042S/2021	BA.1
hCoV-19/Russia/SPE-RII-MH47123S/2021	BA.1
hCoV-19/Russia/SPE-RII-MH47274S/2021	BA.1.15.1
hCoV-19/Russia/SPE-RII-MH47276S/2021	BA.1.1
hCoV-19/Russia/SPE-RII-MH47338S/2021	BA.1.17
hCoV-19/Russia/SPE-RII-MH47346S/2021	BA.1
hCoV-19/Russia/SPE-RII-MH47359S/2021	BA.1.1
hCoV-19/Russia/SPE-RII-MH47560S/2021	BA.1.1
hCoV-19/Russia/SPE-RII-MH47561S/2021	BA.1.1
hCoV-19/Russia/SPE-RII-MH47562S/2021	BA.1.1
hCoV-19/Russia/SPE-RII-MH47564S/2021	BA.1.1
hCoV-19/Russia/SPE-RII-MH47565S/2021	BA.1.1
hCoV-19/Russia/SPE-RII-MH47566S/2021	BA.1.1
hCoV-19/Russia/SPE-RII-MH47567S/2021	BA.1.1
hCoV-19/Russia/SPE-RII-MH47570S/2021	BA.1.1
hCoV-19/Russia/SPE-RII-MH47573S/2021	BA.1.1
hCoV-19/Russia/SPE-RII-MH47576S/2021	BA.1.1
hCoV-19/Russia/SPE-RII-MH47582S/2021	BA.1.1
hCoV-19/Russia/SPE-RII-MH47583S/2021	BA.1.1
hCoV-19/Russia/SPE-RII-MH47584S/2021	BA.1.1
hCoV-19/Russia/SPE-RII-MH48532S/2021	BA.1.1
hCoV-19/Russia/SPE-RII-MH48533S/2021	BA.1
hCoV-19/Russia/SPE-RII-MH48537S/2021	BA.1.17
hCoV-19/Russia/SPE-RII-MH48547S/2021	BA.1.1
hCoV-19/Russia/SPE-RII-MH48549S/2021	BA.1.1
hCoV-19/Russia/SPE-RII-MH48553S/2021	BA.1.15.1
hCoV-19/Russia/SPE-RII-MH48571S/2021	BA.1.1
hCoV-19/Russia/PSK-RII-MH48574S/2021	BA.1.1.15
hCoV-19/Russia/SPE-RII-MH48591S/2021	BA.1.17
hCoV-19/Russia/SPE-RII-MH48601S/2021	BA.1.1
hCoV-19/Russia/SPE-RII-MH48610S/2021	BA.1.1
hCoV-19/Russia/SPE-RII-MH48650S/2021	BA.1.1
hCoV-19/Russia/SPE-RII-MH48654S/2021	BA.1
hCoV-19/Russia/SPE-RII-MH48676S/2021	BA.1
hCoV-19/Russia/SPE-RII-MH48677S/2021	BA.1
hCoV-19/Russia/SPE-RII-MH48679S/2021	BA.1.1
hCoV-19/Russia/SPE-RII-MH48701S/2021	BA.1.17
hCoV-19/Russia/SPE-RII-MH48758S/2021	BA.1.1
hCoV-19/Russia/Moscow171619-031221/2021	BA.1
hCoV-19/Russia/MOW_FPI-326/2022	BA.1.1
hCoV-19/Russia/MOW_FPI-211/2022	BA.1.1
hCoV-19/Russia/BA-RII-MH50579S/2022	BA.1.1
hCoV-19/Russia/MOW-Moscow_PMVL-OA48/2021	BA.1.17
hCoV-19/Russia/MOW-Moscow_PMVL-OA118/2021	BA.1.17
hCoV-19/Russia/MOW-Moscow_PMVL-OA129/2021	BA.1.17
hCoV-19/Russia/MOW-Moscow_PMVL-OA102/2021	BA.1
hCoV-19/Russia/MOW-Moscow_PMVL-OA114/2021	BA.1
hCoV-19/Russia/MOW-Moscow_PMVL-OA113/2021	BA.1
hCoV-19/Russia/MOW-Moscow_PMVL-OA124/2021	BA.1.17
hCoV-19/Russia/SPE-RII-10283S/2022 (1)	BA.1.1
hCoV-19/Russia/SPE-RII-10400S/2022	BA.1.17
hCoV-19/Russia/SPE-RII-9547S/2022	BA.1
hCoV-19/Russia/SPE-RII-9552S/2022	BA.1.1
hCoV-19/Russia/SPE-RII-9570S/2022	BA.1.17
hCoV-19/Russia/SPE-RII-9663S/2022	BA.1.1
hCoV-19/Russia/KL-RII-MH50635S/2022	BA.1
hCoV-19/Russia/AST-RII-MH51354S/2021	BA.1
hCoV-19/Russia/AST-RII-MH51394S/2022	BA.1
hCoV-19/Russia/AST-RII-MH51395S/2022	BA.1
hCoV-19/Russia/AST-RII-MH51396S/2022	BA.1
hCoV-19/Russia/ULY-RII-MH51511S/2022	BA.1.1.13
hCoV-19/Russia/ULY-RII-MH51513S/2022	BA.1.1.13
hCoV-19/Russia/ULY-RII-MH51518S/2022	BA.1.1.13
hCoV-19/Russia/ULY-RII-MH51521S/2022	BA.1.1.13
hCoV-19/Russia/ULY-RII-MH51522S/2022	BA.1.1
hCoV-19/Russia/ULY-RII-MH51525S/2022	BA.1.1.13
hCoV-19/Russia/ULY-RII-MH51526S/2022	BA.1.1
hCoV-19/Russia/ULY-RII-MH51527S/2022	BA.1.1
hCoV-19/Russia/SPE-RII-MH51529S/2022	BA.1
hCoV-19/Russia/SPE-RII-MH51533S/2022	BA.1
hCoV-19/Russia/SPE-RII-MH51534S/2022	BA.1.1
hCoV-19/Russia/SPE-RII-MH51538S/2022	BA.1.17
hCoV-19/Russia/SPE-RII-MH51539S/2022	BA.2
hCoV-19/Russia/SPE-RII-MH51542S/2022	BA.1.17
hCoV-19/Russia/SPE-RII-MH51543S/2022	BA.1.17
hCoV-19/Russia/SPE-RII-MH51549S/2022	BA.1.1
hCoV-19/Russia/SPE-RII-MH51550S/2022	BA.1.1
hCoV-19/Russia/SPE-RII-MH51554S/2022	BA.1.17
hCoV-19/Russia/SPE-RII-MH51556S/2022	BA.1.1
hCoV-19/Russia/SPE-RII-MH51559S/2022	BA.1.1
hCoV-19/Russia/SPE-RII-MH51561S/2022	BA.1.1
hCoV-19/Russia/SPE-RII-MH51563S/2022	BA.1
hCoV-19/Russia/SPE-RII-MH51564S/2022	BA.1.1
hCoV-19/Russia/SPE-RII-MH51565S/2022	BA.1
hCoV-19/Russia/SPE-RII-MH51568S/2022	BA.1.15
hCoV-19/Russia/SPE-RII-MH51569S/2022	BA.1.10
hCoV-19/Russia/SPE-RII-MH51570S/2022	BA.1.1
hCoV-19/Russia/SPE-RII-MH51572S/2022	BA.1.1
hCoV-19/Russia/SPE-RII-MH51577S/2022	BA.1.14
hCoV-19/Russia/SPE-RII-MH51579S/2022	BA.1.1
hCoV-19/Russia/SPE-RII-MH51580S/2022	BA.1.1
hCoV-19/Russia/SPE-RII-MH51581S/2022	BA.1.1
hCoV-19/Russia/SPE-RII-MH51583S/2022	BA.1.1
hCoV-19/Russia/SPE-RII-MH51586S/2022	BA.1.1
hCoV-19/Russia/SPE-RII-MH51589S/2022	BA.1.1
hCoV-19/Russia/SPE-RII-MH51590S/2022	BA.1.1
hCoV-19/Russia/SPE-RII-MH51591S/2022	BA.1.1
hCoV-19/Russia/SPE-RII-MH51593S/2022	BA.1.1
hCoV-19/Russia/SPE-RII-MH51595S/2022	BA.1.1
hCoV-19/Russia/SPE-RII-MH51598S/2022	BA.1.1
hCoV-19/Russia/SPE-RII-MH51599S/2022	BA.1.1
hCoV-19/Russia/SPE-RII-MH51600S/2022	BA.1.1
hCoV-19/Russia/SPE-RII-MH51601S/2022	BA.1.1
hCoV-19/Russia/SPE-RII-MH51602S/2022	BA.1.15
hCoV-19/Russia/SPE-RII-MH51603S/2022	BA.1.1
hCoV-19/Russia/SPE-RII-MH51604S/2022	BA.2
hCoV-19/Russia/SPE-RII-MH51605S/2022	BA.1.1
hCoV-19/Russia/SPE-RII-MH51608S/2022	BA.1.1
hCoV-19/Russia/SPE-RII-MH51609S/2022	BA.1.1
hCoV-19/Russia/SPE-RII-MH51611S/2022	BA.1.17
hCoV-19/Russia/SAR-RII-MH52211S/2022	BA.1.1
hCoV-19/Russia/SAR-RII-MH52215S/2022	BA.1.1
hCoV-19/Russia/SAR-RII-MH52217S/2022	BA.1.1
hCoV-19/Russia/SAR-RII-MH52223S/2022	BA.1.1
hCoV-19/Russia/SAR-RII-MH52224S/2022	BA.1.1
hCoV-19/Russia/SAR-RII-MH52233S/2022	BA.1.1
hCoV-19/Russia/SAR-RII-MH52238S/2022	BA.1.15
hCoV-19/Russia/SAR-RII-MH52245S/2022	BA.1
hCoV-19/Russia/SAR-RII-MH52249S/2022	BA.1.1
hCoV-19/Russia/SAR-RII-MH52257S/2022	BA.1.15
hCoV-19/Russia/SAR-RII-MH52265S/2022	BA.1.1
hCoV-19/Russia/SAR-RII-MH52269S/2022	BA.1
hCoV-19/Russia/SAR-RII-MH52271S/2022	BA.1.1
hCoV-19/Russia/SAR-RII-MH52272S/2022	BA.1.1
hCoV-19/Russia/SAR-RII-MH52274S/2022	BA.1.1
hCoV-19/Russia/SAR-RII-MH52276S/2022	BA.1.1
hCoV-19/Russia/SAR-RII-MH52281S/2022	BA.1.1
hCoV-19/Russia/KB-RII-MH52288S/2022	BA.1.1
hCoV-19/Russia/KB-RII-MH52291S/2022	BA.1.1
hCoV-19/Russia/KB-RII-MH52293S/2022	BA.1.1
hCoV-19/Russia/KB-RII-MH52324S/2022	BA.1.1
hCoV-19/Russia/KB-RII-MH52325S/2022	BA.1.1
hCoV-19/Russia/MAG-RII-MH54257S/2022	BA.1.1
hCoV-19/Russia/MO-RII-MH54261S/2022	BA.1.1
hCoV-19/Russia/MO-RII-MH54298S/2022	BA.1.14
hCoV-19/Russia/SPE-RII-10893S/2022	BA.1.1
hCoV-19/Russia/SPE-RII-10896S/2022	BA.1.1
hCoV-19/Russia/SPE-RII-10900S/2022	BA.1.1
hCoV-19/Russia/SPE-RII-10902S/2022	BA.1
hCoV-19/Russia/SPE-RII-10903S/2022	BA.1.1
hCoV-19/Russia/SPE-RII-10910S/2022	BA.1.17
hCoV-19/Russia/SPE-RII-10918S/2022	BA.1.1.1
hCoV-19/Russia/SPE-RII-10924S/2022	BA.1.13
hCoV-19/Russia/SPE-RII-10925S/2022	BA.1.1
hCoV-19/Russia/SPE-RII-10935S/2022	BA.1.1
hCoV-19/Russia/SPE-RII-10936S/2022 (1)	BA.1.1
hCoV-19/Russia/SPE-RII-10942S/2022	BA.1
hCoV-19/Russia/SPE-RII-10944S/2022	BA.1.1
hCoV-19/Russia/SPE-RII-10951S/2022	BA.1.1
hCoV-19/Russia/MO-RII-MH54303S/2022	BA.1.1
hCoV-19/Russia/ME-RII-MH56693S/2022	BA.1.1
hCoV-19/Russia/ME-RII-MH56703S/2022	BA.2
hCoV-19/Russia/ME-RII-MH56706S/2022	BA.2
hCoV-19/Russia/ME-RII-MH56710S/2022	BA.1
hCoV-19/Russia/ME-RII-MH56711S/2022	BA.2
hCoV-19/Russia/ME-RII-MH56713S/2022	BA.2
hCoV-19/Russia/ME-RII-MH56716S/2022	BA.2
hCoV-19/Russia/ME-RII-MH56718S/2022	BA.2
hCoV-19/Russia/ME-RII-MH56719S/2022	BA.2
hCoV-19/Russia/ME-RII-MH56720S/2022	BA.2
hCoV-19/Russia/ME-RII-MH56721S/2022	BA.2
hCoV-19/Russia/ME-RII-MH56722S/2022	BA.2
hCoV-19/Russia/ME-RII-MH56723S/2022	BA.2
hCoV-19/Russia/ME-RII-MH56724S/2022	BA.1.1
hCoV-19/Russia/ME-RII-MH56727S/2022	BA.1.1
hCoV-19/Russia/ME-RII-MH56729S/2022	BA.2
hCoV-19/Russia/ME-RII-MH56730S/2022	BA.2
hCoV-19/Russia/ME-RII-MH56731S/2022	BA.2
hCoV-19/Russia/ME-RII-MH56732S/2022	BA.2
hCoV-19/Russia/ME-RII-MH56734S/2022	BA.2
hCoV-19/Russia/ME-RII-MH56735S/2022	BA.2
hCoV-19/Russia/ME-RII-MH56736S/2022	BA.1.1
hCoV-19/Russia/ME-RII-MH56737S/2022	BA.1.1
hCoV-19/Russia/ME-RII-MH56738S/2022	BA.2
hCoV-19/Russia/ME-RII-MH56739S/2022	BA.1.1
hCoV-19/Russia/ME-RII-MH56740S/2022	BA.1.1
hCoV-19/Russia/ME-RII-MH56742S/2022	BA.1.1
hCoV-19/Russia/ME-RII-MH56744S/2022	BA.1.1
hCoV-19/Russia/ME-RII-MH56746S/2022	BA.1.1
hCoV-19/Russia/KLU-RII-MH57500S/2022	BA.1.1
hCoV-19/Russia/KLU-RII-MH57501S/2022	BA.1.1
hCoV-19/Russia/KLU-RII-MH57508S/2022	BA.1.1
hCoV-19/Russia/KLU-RII-MH57510S/2022	BA.1.1
hCoV-19/Russia/KLU-RII-MH57511S/2022	BA.1
hCoV-19/Russia/KLU-RII-MH57516S/2022	BA.1.1
hCoV-19/Russia/KLU-RII-MH57517S/2022	BA.1.1
hCoV-19/Russia/KLU-RII-MH57520S/2022	BA.1.1
hCoV-19/Russia/KLU-RII-MH57522S/2022	BA.1.1
hCoV-19/Russia/KLU-RII-MH57536S/2022	BA.1.1
hCoV-19/Russia/KLU-RII-MH57537S/2022	BA.1.15
hCoV-19/Russia/KLU-RII-MH57542S/2022	BA.1.1
hCoV-19/Russia/KLU-RII-MH57543S/2022	BA.1.1
hCoV-19/Russia/KLU-RII-MH57544S/2022	BA.1.1
hCoV-19/Russia/KLU-RII-MH57545S/2022	BA.1.1
hCoV-19/Russia/KLU-RII-MH57560S/2022	BA.2
hCoV-19/Russia/KLU-RII-MH57561S/2022	BA.1.17
hCoV-19/Russia/KLU-RII-MH57569S/2022	BA.1.1
hCoV-19/Russia/KLU-RII-MH57577S/2022	BA.1.1
hCoV-19/Russia/KLU-RII-MH57593S/2022	BA.1.1
hCoV-19/Russia/KLU-RII-MH57616S/2022	BA.2
hCoV-19/Russia/KLU-RII-MH57626S/2022	BA.1.1
hCoV-19/Russia/KLU-RII-MH57627S/2022	BA.1.1
hCoV-19/Russia/KLU-RII-MH57638S/2022	BA.1.1
hCoV-19/Russia/KLU-RII-MH57657S/2022	BA.1.1
hCoV-19/Russia/KLU-RII-MH57658S/2022	BA.1.1
hCoV-19/Russia/KLU-RII-MH57661S/2022	BA.1.1
hCoV-19/Russia/KLU-RII-MH57662S/2022	BA.1.1
hCoV-19/Russia/KLU-RII-MH57668S/2022	BA.2
hCoV-19/Russia/KLU-RII-MH57669S/2022	BA.2
hCoV-19/Russia/KLU-RII-MH57670S/2022	BA.2
hCoV-19/Russia/KLU-RII-MH57672S/2022	BA.1.1.15
hCoV-19/Russia/KLU-RII-MH57674S/2022	BA.1
hCoV-19/Russia/RYA-RII-MH57710S/2022	BA.1.15
hCoV-19/Russia/RYA-RII-MH57712S/2022	BA.1.17
hCoV-19/Russia/RYA-RII-MH57714S/2022	BA.1.17
hCoV-19/Russia/RYA-RII-MH57716S/2022	BA.1.17
hCoV-19/Russia/RYA-RII-MH57717S/2022	BA.1.1
hCoV-19/Russia/RYA-RII-MH57719S/2022	BA.1.1
hCoV-19/Russia/RYA-RII-MH57720S/2022	BA.1.15
hCoV-19/Russia/RYA-RII-MH57722S/2022	BA.1.1
hCoV-19/Russia/RYA-RII-MH57723S/2022	BA.1
hCoV-19/Russia/RYA-RII-MH57726S/2022	BA.1.1
hCoV-19/Russia/RYA-RII-MH57728S/2022	BA.1.1
hCoV-19/Russia/RYA-RII-MH57729S/2022	BA.1
hCoV-19/Russia/RYA-RII-MH57730S/2022	BA.1.1
hCoV-19/Russia/RYA-RII-MH57734S/2022	BA.1.1
hCoV-19/Russia/RYA-RII-MH57735S/2022	BA.1.1
hCoV-19/Russia/RYA-RII-MH57738S/2022	BA.1.15
hCoV-19/Russia/RYA-RII-MH57740S/2022	BA.1.1
hCoV-19/Russia/RYA-RII-MH57741S/2022	BA.1.1
hCoV-19/Russia/RYA-RII-MH57743S/2022	BA.1.1
hCoV-19/Russia/RYA-RII-MH57745S/2022	BA.1.1
hCoV-19/Russia/RYA-RII-MH57750S/2022	BA.1
hCoV-19/Russia/RYA-RII-MH57761S/2022	BA.1.1
hCoV-19/Russia/RYA-RII-MH57767S/2022	BA.1
hCoV-19/Russia/RYA-RII-MH57770S/2022	BA.1.1
hCoV-19/Russia/RYA-RII-MH57772S/2022	BA.1.1
hCoV-19/Russia/RYA-RII-MH57773S/2022	BA.1.15
hCoV-19/Russia/RYA-RII-MH57774S/2022	BA.1
hCoV-19/Russia/RYA-RII-MH57775S/2022	BA.1
hCoV-19/Russia/RYA-RII-MH57782S/2022	BA.1
hCoV-19/Russia/RYA-RII-MH57783S/2022	BA.1
hCoV-19/Russia/IVA-RII-MH57809S/2022	BA.2
hCoV-19/Russia/IVA-RII-MH57810S/2022	BA.1.1
hCoV-19/Russia/IVA-RII-MH57811S/2022	BA.1.1
hCoV-19/Russia/IVA-RII-MH57813S/2022	BA.1.17
hCoV-19/Russia/IVA-RII-MH57814S/2022	BA.1.17
hCoV-19/Russia/IVA-RII-MH57815S/2022	BA.1.1
hCoV-19/Russia/IVA-RII-MH57816S/2022	BA.1.1
hCoV-19/Russia/IVA-RII-MH57817S/2022	BA.1.15
hCoV-19/Russia/IVA-RII-MH57818S/2022	BA.1.1
hCoV-19/Russia/IVA-RII-MH57820S/2022	BA.1
hCoV-19/Russia/IVA-RII-MH57821S/2022	BA.1.1
hCoV-19/Russia/IVA-RII-MH57822S/2022	BA.1.1
hCoV-19/Russia/IVA-RII-MH57823S/2022	BA.1.17
hCoV-19/Russia/IVA-RII-MH57824S/2022	BA.1.1
hCoV-19/Russia/IVA-RII-MH57833S/2022	BA.1.1
hCoV-19/Russia/IVA-RII-MH57836S/2022	BA.1.17
hCoV-19/Russia/IVA-RII-MH57844S/2022	BA.1.1
hCoV-19/Russia/IVA-RII-MH57848S/2022	BA.1.15
hCoV-19/Russia/IVA-RII-MH57850S/2022	BA.1.15
hCoV-19/Russia/IVA-RII-MH57851S/2022	BA.1.1
hCoV-19/Russia/IVA-RII-MH57854S/2022	BA.1.1
hCoV-19/Russia/IVA-RII-MH57856S/2022	BA.1.17
hCoV-19/Russia/IVA-RII-MH57860S/2022	BA.1.1
hCoV-19/Russia/IVA-RII-MH57866S/2022	BA.1.1
hCoV-19/Russia/IVA-RII-MH57872S/2022	BA.1.1
hCoV-19/Russia/IVA-RII-MH57873S/2022	BA.1.1
hCoV-19/Russia/IVA-RII-MH57875S/2022	BA.1.1
Russia/LQ-21538_S277/2022	BA.1.1
Russia/LQ-21543_S278/2022	BA.1.1
Russia/LQ-21577_S204/2022	BA.1.1
Russia/LQ-21578_S205/2022	BA.1.1.1
Russia/LQ-21753_S184/2022	BA.2
Russia/LQ-21754_S185/2022	BA.2
Russia/LQ-21760_S1/2022	BA.1
Russia/LQ-21767_S186/2022	BA.2
Russia/LQ-21768_S187/2022	BA.2
Russia/LQ-21804_S3/2022	BA.1.1
Russia/LQ-21811_S188/2022	BA.2
Russia/LQ-21858_S189/2022	BA.2
Russia/LQ-21863_S190/2022	BA.2
Russia/LQ-21865_S6/2022	BA.1
Russia/LQ-21868_S8/2022	BA.1.1
Russia/LQ-21871_S9/2022	B.1.1.529
Russia/LQ-21874_S10/2022	BA.1.1
Russia/LQ-21880_S11/2022	BA.1.1
Russia/LQ-21884_S12/2022	BA.1.1
Russia/LQ-21885_S13/2022	BA.1.15
Russia/LQ-21901_S15/2022	BA.1
Russia/LQ-21903_S16/2022	BA.1.15
Russia/LQ-21917_S17/2022	BA.1
Russia/LQ-21922_S18/2022	BA.1
Russia/LQ-21925_S19/2022	BA.1.1
Russia/LQ-21928_S20/2022	BA.1
Russia/LQ-21932_S21/2022	BA.1
Russia/LQ-21937_S22/2022	BA.1.1
Russia/LQ-21940_S191/2022	BA.2
Russia/LQ-21943_S23/2022	BA.1.1
Russia/LQ-21953_S24/2022	BA.1
Russia/LQ-21954_S25/2022	BA.1.1
Russia/LQ-21955_S26/2022	BA.1.17
Russia/LQ-21966_S27/2022	BA.1.15
Russia/LQ-21968_S28/2022	BA.1.1
Russia/LQ-21974_S29/2022	BA.1.1
Russia/LQ-21975_S30/2022	BA.1.1
Russia/LQ-21977_S31/2022	BA.1.17
Russia/LQ-21979_S32/2022	BA.1.1
Russia/LQ-21987_S33/2022	BA.1.15
Russia/LQ-21998_S34/2022	BA.1.1
Russia/LQ-22002_S35/2022	BA.1.1
Russia/LQ-22007_S36/2022	BA.1.1
Russia/LQ-22018_S37/2022	BA.1.1
Russia/LQ-22025_S192/2022	BA.2
Russia/LQ-22033_S39/2022	BA.1.1
Russia/LQ-22034_S40/2022	BA.1.1
Russia/LQ-22036_S41/2022	BA.1.1
Russia/LQ-22045_S42/2022	BA.1.14
Russia/LQ-22083_S43/2022	BA.1.1
Russia/LQ-22089_S44/2022	BA.1
Russia/LQ-22090_S45/2022	BA.1.1
Russia/LQ-22094_S46/2022	BA.1.1
Russia/LQ-22097_S47/2022	BA.1.17
Russia/LQ-22100_S48/2022	BA.1
Russia/LQ-22109_S49/2022	BA.1.1
Russia/LQ-22115_S50/2022	BA.1.17
Russia/LQ-22116_S51/2022	BA.1.17
Russia/LQ-22132_S52/2022	BA.1.1
Russia/LQ-22139_S55/2022	BA.1.14
Russia/LQ-22145_S57/2022	BA.1.15
Russia/LQ-22147_S58/2022	B.1.1
Russia/LQ-22152_S60/2022	BA.1.1
Russia/LQ-22155_S61/2022	BA.1.17
Russia/LQ-22160_S62/2022	BA.1.1
Russia/LQ-22170_S63/2022	BA.1
Russia/LQ-22172_S64/2022	BA.1.1
Russia/LQ-22173_S65/2022	BA.1.1
Russia/LQ-22180_S66/2022	BA.1.1
Russia/LQ-22181_S67/2022	BA.1.17
Russia/LQ-22183_S68/2022	BA.1.1
Russia/LQ-22201_S227/2022	BA.1.1
Russia/LQ-22217_S69/2022	BA.1.1
Russia/LQ-22224_S70/2022	BA.1.1
Russia/LQ-22231_S71/2022	BA.1.1
Russia/LQ-22239_S72/2022	BA.1
Russia/LQ-22241_S73/2022	BA.1.1
Russia/LQ-22250_S74/2022	BA.1
Russia/LQ-22253_S75/2022	BA.1.1
Russia/LQ-22260_S76/2022	BA.1.17
Russia/LQ-22263_S77/2022	BA.1.1
Russia/LQ-22264_S78/2022	BA.1.1
Russia/LQ-22270_S79/2022	BA.1.1
Russia/LQ-22271_S80/2022	BA.1.1
Russia/LQ-22274_S81/2022	BA.1.1.15
Russia/LQ-22277_S82/2022	BA.1.14
Russia/LQ-22280_S83/2022	BA.1.1
Russia/LQ-22284_S84/2022	BA.1.1
Russia/LQ-22297_S85/2022	BA.1.1
Russia/LQ-22300_S86/2022	BA.1
Russia/LQ-22302_S87/2022	BA.1.1
Russia/LQ-22309_S88/2022	BA.1.1
Russia/LQ-22314_S89/2022	BA.1.1
Russia/LQ-22316_S90/2022	BA.2
Russia/LQ-22321_S91/2022	BA.1.1
Russia/LQ-22324_S241/2022	BA.1
Russia/LQ-22327_S92/2022	BA.1.14
Russia/LQ-22331_S93/2022	BA.2
Russia/LQ-22334_S94/2022	BA.1.1
Russia/LQ-22336_S243/2022	BA.1
Russia/LQ-22345_S95/2022	BA.1
Russia/LQ-22347_S96/2022	BA.1.1.14
Russia/LQ-22348_S97/2022	BA.1.1
Russia/LQ-22351_S98/2022	BA.1
Russia/LQ-22354_S99/2022	BA.1
Russia/LQ-22364_S100/2022	BA.1.15
Russia/LQ-22365_S101/2022	BA.2
Russia/LQ-22367_S102/2022	BA.2
Russia/LQ-22373_S103/2022	BA.1.1
Russia/LQ-22376_S104/2022	BA.1.1.1
Russia/LQ-22378_S105/2022	BA.1.1
Russia/LQ-22382_S106/2022	BA.1
Russia/LQ-22384_S107/2022	B.1.1
Russia/LQ-22385_S108/2022	BA.1
Russia/LQ-22390_S110/2022	BA.1.17
Russia/LQ-22392_S111/2022	BA.1.1
Russia/LQ-22394_S112/2022	BA.1.1
Russia/LQ-22396_S113/2022	BA.2
Russia/LQ-22430_S120/2022	BA.1
Russia/LQ-22432_S121/2022	BA.1
Russia/LQ-22433_S122/2022	BA.1.15
Russia/LQ-22435_S123/2022	BA.2
Russia/LQ-22439_S124/2022	BA.1
Russia/LQ-22443_S125/2022	BA.1.1
Russia/LQ-22446_S127/2022	BA.1
Russia/LQ-22449_S128/2022	BA.1
Russia/LQ-22452_S129/2022	BA.1.1
Russia/LQ-22466_S130/2022	BA.1.1
Russia/LQ-22470_S193/2022	BA.2
Russia/LQ-22477_S131/2022	BA.1.1
Russia/LQ-22481_S132/2022	BA.1.15
Russia/LQ-22483_S133/2022	BA.1.1
Russia/LQ-22484_S134/2022	BA.1.15
Russia/LQ-22494_S135/2022	BA.1.15
Russia/LQ-22506_S194/2022	BA.2
Russia/LQ-22519_S136/2022	BA.1.1
Russia/LQ-22521_S137/2022	BA.1.1
Russia/LQ-22526_S138/2022	BA.1.1
Russia/LQ-22527_S139/2022	BA.1.1
Russia/LQ-22528_S195/2022	BA.1.1
Russia/LQ-22530_S140/2022	BA.1
Russia/LQ-22536_S141/2022	BA.1.1
Russia/LQ-22537_S142/2022	BA.1.15
Russia/LQ-22538_S143/2022	BA.1.1
Russia/LQ-22543_S144/2022	BA.1.1
Russia/LQ-22545_S145/2022	BA.1
Russia/LQ-22546_S146/2022	BA.1.17
Russia/LQ-22553_S147/2022	BA.1.15
Russia/LQ-22554_S148/2022	BA.1.1
Russia/LQ-22559_S149/2022	BA.1.1
Russia/LQ-22561_S150/2022	BA.1.1
Russia/LQ-22571_S151/2022	BA.1.1
Russia/LQ-22572_S152/2022	BA.1.1
Russia/LQ-22576_S153/2022	BA.2
Russia/LQ-22596_S154/2022	BA.2
Russia/LQ-22603_S155/2022	BA.1.1
Russia/LQ-22605_S156/2022	BA.1.1
Russia/LQ-22609_S157/2022	BA.1.1
Russia/LQ-22626_S158/2022	BA.2
Russia/LQ-22628_S159/2022	BA.1
Russia/LQ-22633_S160/2022	BA.1.1
Russia/LQ-22635_S161/2022	BA.1.1
Russia/LQ-22641_S162/2022	BA.1
Russia/LQ-22642_S163/2022	BA.1.17
Russia/LQ-22646_S164/2022	BA.1
Russia/LQ-22654_S165/2022	B.1
Russia/LQ-22655_S166/2022	BA.1.1
Russia/LQ-22656_S167/2022	BA.1.1
Russia/LQ-22657_S168/2022	BA.1
Russia/LQ-22659_S169/2022	BA.2
Russia/LQ-22664_S170/2022	BA.1.1
Russia/LQ-22665_S171/2022	BA.1.1
Russia/LQ-22666_S172/2022	BA.2
Russia/LQ-22667_S173/2022	BA.1.1
Russia/LQ-22668_S174/2022	BA.1.1
Russia/LQ-22670_S175/2022	BA.1.1
Russia/LQ-22672_S176/2022	BA.1.1
Russia/LQ-22674_S177/2022	BA.1.1
Russia/LQ-22682_S178/2022	BA.2
Russia/LQ-22685_S179/2022	BA.1.1
Russia/LQ-22692_S180/2022	BA.1.1
Russia/LQ-22693_S181/2022	BA.1.1
Russia/LQ-22695_S182/2022	BA.1.14
Russia/LQ-22714_S276/2022	BA.1.1
Russia/LQ-22840_S279/2022	BA.1.1
Russia/LQ-22847_S280/2022	BA.1
Russia/LQ-22884_S281/2022	BA.1.1
Russia/LQ-22885_S282/2022	BA.1
Russia/LQ-22888_S283/2022	BA.1.17
Russia/LQ-22902_S284/2022	BA.2
Russia/LQ-22946_S196/2022	BA.2
Russia/LQ-22951_S285/2022	BA.1.1
Russia/LQ-22970_S286/2022	BA.1.17
Russia/LQ-22984_S287/2022	BA.1
Russia/LQ-22985_S288/2022	BA.1
Russia/LQ-22993_S289/2022	BA.1.1
Russia/LQ-23004_S197/2022	BA.2
Russia/LQ-23007_S198/2022	BA.2
Russia/LQ-23027_S290/2022	BA.1
Russia/LQ-23030_S291/2022	BA.1.1
Russia/LQ-23035_S292/2022	BA.1.1
Russia/LQ-23061_S293/2022	BA.2
Russia/LQ-23066_S294/2022	B.1.1.529
Russia/LQ-23067_S295/2022	BA.1.1
Russia/LQ-23072_S296/2022	BA.1.17
Russia/LQ-23075_S297/2022	BA.1.17
Russia/LQ-23076_S298/2022	BA.1
Russia/LQ-23080_S299/2022	BA.1
Russia/LQ-23082_S300/2022	BA.1.1
Russia/LQ-23093_S301/2022	BA.1.1
Russia/LQ-23095_S302/2022	BA.1.1
Russia/LQ-23104_S303/2022	BA.1
Russia/LQ-23112_S304/2022	BA.1.15
Russia/LQ-23115_S305/2022	BA.1.17
Russia/LQ-23118_S306/2022	BA.1
Russia/LQ-23121_S199/2022	BA.2
Russia/LQ-23122_S307/2022	BA.2
Russia/LQ-23125_S308/2022	BA.1.1
Russia/LQ-23126_S309/2022	BA.1.1
Russia/LQ-23131_S310/2022	BA.1.1
Russia/LQ-23137_S311/2022	BA.1.1
Russia/LQ-23138_S312/2022	BA.1.1
Russia/LQ-23140_S313/2022	BA.1.15
Russia/LQ-23141_S314/2022	BA.1
Russia/LQ-23144_S315/2022	BA.1.17
Russia/LQ-23145_S316/2022	BA.1.1
Russia/LQ-23147_S317/2022	BA.1.1
Russia/LQ-23149_S318/2022	BA.1.1
Russia/LQ-23153_S319/2022	BA.1
Russia/LQ-23155_S320/2022	BA.1
Russia/LQ-23156_S200/2022	BA.2
Russia/LQ-23161_S321/2022	BA.1.1
Russia/LQ-23163_S322/2022	BA.1
Russia/LQ-23165_S323/2022	BA.1.1
Russia/LQ-23167_S324/2022	BA.1
Russia/LQ-23177_S325/2022	BA.1.1
Russia/LQ-23178_S326/2022	BA.2
Russia/LQ-23182_S327/2022	BA.1.14
Russia/LQ-23185_S328/2022	BA.1
Russia/LQ-23198_S329/2022	BA.1.15
Russia/LQ-23204_S330/2022	BA.1
Russia/LQ-23215_S331/2022	BA.1.1
Russia/LQ-23224_S332/2022	BA.1.1
Russia/LQ-23226_S333/2022	BA.1.1
Russia/LQ-23227_S334/2022	BA.2
Russia/LQ-23228_S335/2022	BA.1.1
Russia/LQ-23234_S336/2022	BA.1
Russia/LQ-23248_S337/2022	BA.1
Russia/LQ-23252_S338/2022	BA.1
Russia/LQ-23268_S339/2022	BA.1
Russia/LQ-23271_S340/2022	BA.1.1
Russia/LQ-23274_S341/2022	BA.1.1
Russia/LQ-23276_S342/2022	BA.1
Russia/LQ-23279_S343/2022	BA.1.1
Russia/LQ-23281_S344/2022	BA.1.1
Russia/LQ-23283_S345/2022	BA.1.1
Russia/LQ-23284_S346/2022	BA.1.1
Russia/LQ-23289_S347/2022	BA.1.1
Russia/LQ-23299_S348/2022	BA.1.1
Russia/LQ-23316_S349/2022	BA.1.1
Russia/LQ-23344_S350/2022	BA.2
Russia/LQ-23367_S351/2022	BA.1.17
Russia/LQ-23400_S352/2022	BA.1
Russia/LQ-23409_S353/2022	BA.1.1
Russia/LQ-23414_S354/2022	BA.1.1
Russia/LQ-23416_S355/2022	BA.1.1
Russia/LQ-23443_S356/2022	BA.1
Russia/LQ-23453_S357/2022	BA.2
Russia/LQ-23456_S201/2022	BA.2
Russia/LQ-23460_S358/2022	BA.1.1
Russia/LQ-23476_S202/2022	BA.2
Russia/LQ-23507_S359/2022	BA.1.1
Russia/LQ-23509_S360/2022	BA.2
Russia/LQ-23510_S361/2022	BA.1.1
Russia/LQ-23533_S362/2022	BA.1.1
Russia/LQ-23543_S363/2022	BA.1.1
Russia/LQ-23549_S364/2022	BA.1.1
Russia/LQ-23552_S203/2022	BA.2
Russia/LQ-23553_S365/2022	BA.1.1
Russia/LQ-23556_S366/2022	BA.1.1
Russia/LQ-23566_S367/2022	BA.1.15
Russia/LQ-23567_S368/2022	BA.1.1
Russia/LQ-23574_S369/2022	BA.1.1
Russia/LQ-23578_S370/2022	BA.1.1
Russia/LQ-23581_S371/2022	BA.2
Russia/LQ-23587_S216/2022	BA.1.1
Russia/LQ-23589_S217/2022	BA.1.1
Russia/LQ-23591_S218/2022	BA.1.1
Russia/LQ-23596_S219/2022	BA.2
Russia/LQ-23600_S220/2022	BA.1
Russia/LQ-23604_S221/2022	BA.1.1.1
Russia/LQ-23611_S222/2022	BA.1.1
Russia/LQ-23622_S223/2022	BA.1.1
Russia/LQ-23624_S224/2022	BA.1.1
Russia/LQ-23627_S225/2022	BA.1.1
Russia/LQ-23630_S226/2022	BA.1.1
Russia/LQ-23647_S228/2022	BA.1.1
Russia/LQ-23650_S229/2022	BA.1.14
Russia/LQ-23651_S206/2022	BA.2
Russia/LQ-23653_S230/2022	BA.1.1
Russia/LQ-23654_S231/2022	BA.1.15
Russia/LQ-23658_S232/2022	BA.1.1
Russia/LQ-23659_S233/2022	BA.1.1
Russia/LQ-23664_S234/2022	BA.2
Russia/LQ-23673_S207/2022	BA.2
Russia/LQ-23695_S236/2022	BA.1.1
Russia/LQ-23696_S208/2022	BA.1.1
Russia/LQ-23699_S209/2022	BA.1.17
Russia/LQ-23700_S237/2022	BA.1.1
Russia/LQ-23702_S238/2022	BA.1.1
Russia/LQ-23707_S210/2022	BA.1.1
Russia/LQ-23713_S239/2022	BA.1.1
Russia/LQ-23716_S211/2022	BA.1
Russia/LQ-23717_S240/2022	BA.1.1
Russia/LQ-23729_S242/2022	BA.1
Russia/LQ-23739_S244/2022	BA.2
Russia/LQ-23740_S245/2022	BA.1.1
Russia/LQ-23753_S246/2022	BA.1.1
Russia/LQ-23754_S247/2022	BA.1.1
Russia/LQ-23758_S248/2022	BA.1.1
Russia/LQ-23764_S249/2022	BA.1.1
Russia/LQ-23772_S212/2022	BA.1.1
Russia/LQ-23774_S250/2022	BA.1.1
Russia/LQ-23820_S251/2022	BA.2
Russia/LQ-23822_S252/2022	BA.2
Russia/LQ-23825_S253/2022	BA.1.1
Russia/LQ-23827_S254/2022	BA.2
Russia/LQ-23836_S255/2022	BA.2
Russia/LQ-23843_S256/2022	BA.1.1
Russia/LQ-23846_S257/2022	BA.1.6
Russia/LQ-23854_S258/2022	BA.1.1
Russia/LQ-23862_S213/2022	BA.1.1
Russia/LQ-23864_S259/2022	BA.1.1
Russia/LQ-23865_S260/2022	BA.2
Russia/LQ-23871_S261/2022	BA.1.1
Russia/LQ-23873_S262/2022	BA.1.1
Russia/LQ-23899_S214/2022	BA.2
Russia/LQ-23900_S263/2022	BA.1.1
Russia/LQ-23902_S264/2022	BA.1.1
Russia/LQ-23909_S265/2022	BA.1.1
Russia/LQ-23930_S266/2022	BA.1.1
Russia/LQ-23933_S267/2022	BA.2
Russia/LQ-23937_S268/2022	BA.1.1
Russia/LQ-23940_S269/2022	BA.1.1
Russia/LQ-23942_S270/2022	BA.1.17
Russia/LQ-23944_S271/2022	BA.1.1
Russia/LQ-23945_S272/2022	BA.1
Russia/LQ-23947_S273/2022	BA.1.1
Russia/LQ-23949_S274/2022	BA.1.1
Russia/LQ-23950_S275/2022	BA.1.1
Russia/RZD-266_S183/2022	BA.2
Russia/RZD-295_S215/2022	BA.2
Russia/LQ-20972_S1/2022	BA.1.1
Russia/LQ-20973_S76/2022	BA.1.1
Russia/LQ-20975_S77/2022	BA.1.17
Russia/LQ-20976_S2/2022	BA.1.1
Russia/LQ-20977_S3/2022	BA.1.17
Russia/LQ-20981_S4/2022	BA.1.1
Russia/LQ-20984_S5/2022	BA.1
Russia/LQ-20985_S6/2022	BA.1.17
Russia/LQ-20986_S7/2022	BA.1
Russia/LQ-20991_S78/2022	BA.1.17
Russia/LQ-20992_S9/2022	BA.1.17
Russia/LQ-20993_S10/2022	BA.1
Russia/LQ-21001_S11/2022	BA.1
Russia/LQ-21002_S12/2022	BA.1
Russia/LQ-21005_S13/2022	BA.1
Russia/LQ-21009_S14/2022	BA.1.1
Russia/LQ-21011_S15/2022	BA.1.15
Russia/LQ-21012_S16/2022	BA.1
Russia/LQ-21013_S17/2022	B.1.1.529
Russia/LQ-21014_S18/2022	BA.1.1
Russia/LQ-21016_S19/2022	BA.1
Russia/LQ-21021_S20/2022	BA.1.1
Russia/LQ-21024_S21/2022	BA.1.14
Russia/LQ-21027_S22/2022	BA.1.17
Russia/LQ-21031_S23/2022	BA.1.1
Russia/LQ-21032_S24/2022	BA.1.1
Russia/LQ-21033_S79/2022	BA.1.1
Russia/LQ-21034_S80/2022	BA.1.1
Russia/LQ-21036_S25/2022	BA.1.1
Russia/LQ-21037_S26/2022	BA.1.17
Russia/LQ-21040_S27/2022	BA.1
Russia/LQ-21045_S28/2022	BA.1.1
Russia/LQ-21047_S81/2022	BA.1.1
Russia/LQ-21053_S29/2022	BA.1.1
Russia/LQ-21056_S30/2022	BA.1.1
Russia/LQ-21058_S31/2022	BA.1.1
Russia/LQ-21063_S32/2022	BA.1
Russia/LQ-21075_S33/2022	BA.1
Russia/LQ-21079_S34/2022	BA.1.1.15
Russia/LQ-21093_S82/2022	BA.1.1
Russia/LQ-21095_S35/2022	BA.1.1
Russia/LQ-21096_S36/2022	BA.1.17
Russia/LQ-21098_S37/2022	BA.1
Russia/LQ-21101_S40/2022	BA.1
Russia/LQ-21103_S41/2022	BA.1.15
Russia/LQ-21106_S42/2022	BA.1.1
Russia/LQ-21108_S83/2022	BA.1.1.1
Russia/LQ-21109_S44/2022	BA.1.1
Russia/LQ-21110_S45/2022	BA.1.1
Russia/LQ-21111_S46/2022	BA.1.17
Russia/LQ-21112_S84/2022	BA.1.1
Russia/LQ-21114_S47/2022	BA.1
Russia/LQ-21115_S48/2022	BA.1.1
Russia/LQ-21118_S85/2022	BA.1.1
Russia/LQ-21119_S86/2022	BA.1.1
Russia/LQ-21121_S49/2022	BA.1.1
Russia/LQ-21122_S50/2022	BA.1.1
Russia/LQ-21123_S51/2022	BA.1.17
Russia/LQ-21124_S52/2022	BA.1
Russia/LQ-21130_S53/2022	BA.1.1
Russia/LQ-21135_S54/2022	BA.1
Russia/LQ-21138_S55/2022	BA.1.1
Russia/LQ-21141_S87/2022	BA.1.1
Russia/LQ-21143_S56/2022	BA.1.1
Russia/LQ-21147_S57/2022	BA.1.1.15
Russia/LQ-21152_S58/2022	BA.1.15
Russia/LQ-21156_S88/2022	BA.1.17
Russia/LQ-21160_S59/2022	BA.1
Russia/LQ-21162_S60/2022	BA.1.1
Russia/LQ-21163_S61/2022	BA.1.1
Russia/LQ-21167_S62/2022	BA.1
Russia/LQ-21170_S64/2022	BA.1
Russia/LQ-21173_S66/2022	BA.1.17
Russia/LQ-21174_S67/2022	BA.1.1
Russia/LQ-21176_S68/2022	BA.1
Russia/LQ-21179_S70/2022	BA.1.17
Russia/LQ-21180_S71/2022	BA.1.1.1
Russia/LQ-21185_S72/2022	BA.1.1
Russia/LQ-21198_S73/2022	BA.1.1
Russia/LQ-21204_S74/2022	BA.1.1
Russia/LQ-21205_S75/2022	BA.1.1
Russia/LQ-21255_S92/2022	BA.1.1
Russia/LQ-21258_S93/2022	BA.1
Russia/LQ-21259_S94/2022	BA.1
Russia/LQ-21269_S95/2022	BA.1.1
Russia/LQ-21273_S96/2022	BA.1.1
Russia/LQ-21274_S97/2022	BA.1.15
Russia/LQ-21276_S98/2022	BA.1.1
Russia/LQ-21278_S99/2022	BA.1.1
Russia/LQ-21279_S100/2022	BA.1.1
Russia/LQ-21288_S101/2022	BA.1.1
Russia/LQ-21289_S102/2022	BA.1.1
Russia/LQ-21290_S103/2022	BA.1.1
Russia/LQ-21300_S104/2022	BA.1.1
Russia/LQ-21321_S105/2022	BA.1.1
Russia/LQ-21322_S106/2022	BA.1
Russia/LQ-21323_S107/2022	BA.1.1
Russia/LQ-21327_S108/2022	BA.1.1
Russia/LQ-21330_S109/2022	BA.1.1
Russia/LQ-21333_S110/2022	BA.1.1
Russia/LQ-21334_S111/2022	BA.1.1
Russia/LQ-21336_S112/2022	BA.1.1
Russia/LQ-21337_S113/2022	BA.1
Russia/LQ-21342_S114/2022	BA.1.15
Russia/LQ-21345_S115/2022	BA.1.1
Russia/LQ-21346_S175/2022	BA.1.1
Russia/LQ-21380_S116/2022	BA.1.1
Russia/LQ-21382_S117/2022	BA.1.1
Russia/LQ-21387_S118/2022	BA.1.15
Russia/LQ-21388_S119/2022	BA.1.1
Russia/LQ-21390_S120/2022	BA.1.1.15
Russia/LQ-21391_S121/2022	BA.1
Russia/LQ-21398_S122/2022	BA.1
Russia/LQ-21399_S123/2022	BA.1.1
Russia/LQ-21403_S124/2022	BA.1
Russia/LQ-21408_S125/2022	BA.1.1
Russia/LQ-21409_S126/2022	BA.1.1
Russia/LQ-21414_S127/2022	BA.1.1
Russia/LQ-21417_S128/2022	BA.1
Russia/LQ-21419_S129/2022	BA.1.1
Russia/LQ-21421_S130/2022	BA.1.1
Russia/LQ-21424_S178/2022	BA.1
Russia/LQ-21426_S131/2022	BA.1.1
Russia/LQ-21429_S132/2022	BA.1.1
Russia/LQ-21433_S133/2022	BA.1.1
Russia/LQ-21436_S134/2022	BA.1.1
Russia/LQ-21443_S135/2022	BA.1.1
Russia/LQ-21444_S136/2022	BA.1
Russia/LQ-21450_S137/2022	BA.1
Russia/LQ-21453_S138/2022	BA.1.1
Russia/LQ-21456_S139/2022	BA.1.1
Russia/LQ-21459_S140/2022	BA.1.1
Russia/LQ-21460_S141/2022	BA.1.1
Russia/LQ-21465_S142/2022	BA.1.15
Russia/LQ-21467_S143/2022	BA.1
Russia/LQ-21469_S144/2022	BA.1.15
Russia/LQ-21482_S145/2022	BA.1.15
Russia/LQ-21484_S146/2022	BA.1.1
Russia/LQ-21485_S147/2022	BA.1.1
Russia/LQ-21487_S148/2022	BA.1
Russia/LQ-21489_S180/2022	BA.1.1
Russia/LQ-21496_S149/2022	BA.1.1
Russia/LQ-21498_S150/2022	BA.1.1
Russia/LQ-21508_S151/2022	BA.1
Russia/LQ-21518_S152/2022	BA.1
Russia/LQ-NikolayD_S90/2022	BA.1.1
Russia/LQ-Vladimir1_S89/2022	BA.1.1
Russia/RGD-166_S153/2022	BA.1
Russia/RGD-179_S156/2022	BA.1
Russia/RGD-186_S158/2022	BA.1.15
Russia/RGD-189_S160/2022	BA.1.1
Russia/RGD-196_S162/2022	BA.1.1
Russia/RGD-212_S167/2022	BA.1.15
Russia/RGD-214_S168/2022	BA.1.1
Russia/RGD-232_S174/2022	BA.1.1
Russia/RGD-253_S182/2022	BA.1.1
Russia/LQ-20488_S1/2022	BA.1.17
Russia/LQ-20522_S2/2022	BA.1.15
Russia/LQ-20562_S3/2022	BA.1.1
Russia/LQ-20570_S4/2022	BA.1.1
Russia/LQ-20587_S5/2022	BA.1
Russia/LQ-20589_S6/2022	BA.1.15
Russia/LQ-20594_S7/2022	BA.1.1
Russia/LQ-20598_S8/2022	BA.1.1
Russia/LQ-20599_S9/2022	BA.1
Russia/LQ-20645_S10/2022	BA.1.17
Russia/LQ-20690_S11/2022	BA.1.1
Russia/LQ-20694_S12/2022	BA.1
Russia/LQ-20698_S13/2022	BA.1.15
Russia/LQ-20706_S14/2022	BA.1.1
Russia/LQ-20707_S15/2022	BA.1
Russia/LQ-20743_S16/2022	BA.1
Russia/LQ-20750_S17/2022	BA.1
Russia/LQ-20755_S18/2022	BA.1
Russia/LQ-20757_S19/2022	BA.1
Russia/LQ-20784_S20/2022	BA.1
Russia/LQ-20791_S21/2022	BA.1.1
Russia/LQ-20806_S22/2022	BA.1.17
Russia/LQ-20908_S23/2022	BA.1.15
Russia/LQ-20923_S24/2022	BA.1.15
Russia/LQ-20929_S25/2022	BA.1.15
Russia/LQ-20946_S26/2022	BA.1.1
Russia/LQ-20955_S27/2022	BA.1.1
Russia/LQ-20959_S28/2022	BA.1
Russia/LQ-20010_S21/2022	BA.1.16
Russia/LQ-20036_S30/2022	BA.1.17
Russia/Uganda_S175/2022	BA.1
Russia/VIS-2_S192/2022	BA.1.17
Russia/VIS-5_S40/2022	BA.1.1
Russia/VIS_S220/2022	BA.1.14

## Sheet: Delta_mut_GISAID
Supplementary Table 5. Identification of Delta-specific substitution in SARS-CoV-2 Omicron strains
seqName	Pangolin Lineage	Mutations
hCoV-19/India/KA-SEQ_9742_S46_R1_001/2022	BA.1.1.11	M:I82T, N:R203M, ORF1a:P2046L, S:L452R
hCoV-19/USA/UT-UPHL-220218896874/2022	BA.1.15	M:I82T, ORF1a:P2046L, S:L452R
hCoV-19/England/DHSC-CYBAIGB/2021	BA.1.16	M:I82T, ORF1a:P2046L, S:L452R
hCoV-19/USA/FL-MSL-3426/2021	BA.1.15	M:I82T, ORF1a:P2046L, S:L452R
hCoV-19/USA/NC-CDC-LC0541963/2022	BA.1.1.11	M:I82T, N:R203M, ORF1a:P2046L, S:L452R
hCoV-19/Morocco/567/2022	BA.1.14	M:I82T, ORF1a:P2046L, S:L452R
hCoV-19/USA/WA-CDC-UW22022117242/2022	BA.1.1	M:I82T, ORF1a:P2046L, S:L452R
hCoV-19/USA/WA-CDC-UW22022115489/2022	BA.1.1	M:I82T, ORF1a:P2046L, S:L452R
hCoV-19/France/IDF-SLS-762201087571/2022	BA.1	M:I82T, ORF1a:P2046L, S:L452R
hCoV-19/France/IDF-SLS-762112086193/2021	BA.1	M:I82T, ORF1a:P2046L, S:L452R
hCoV-19/USA/MS-MSPHL-0725/2022	BA.1.15	M:I82T, ORF1a:P2046L, S:L452R
hCoV-19/India/TN-ICMR-INSACOG-SPHL0667/2021	BA.1.15	M:I82T, ORF1a:P2046L, S:L452R
hCoV-19/USA/CO-CDPHE-2103026976/2022	BA.1.15	M:I82T, ORF1a:P2046L, S:L452R
hCoV-19/Russia/SMO-CRIE-S_7720494937/2022	BA.1.15	M:I82T, ORF1a:P2046L, S:L452R
hCoV-19/India/GJ-INSACOG-GBRC2991/2021	BA.1	M:I82T, ORF1a:P2046L, S:L452R
hCoV-19/Australia/NSW-ICPMR-15575/2021	BA.1.17	M:I82T, N:R203M, ORF1a:P2046L, S:L452R
hCoV-19/Australia/NSW-ICPMR-15875/2021	BA.1.17	M:I82T, N:R203M, ORF1a:P2046L, S:L452R
hCoV-19/Australia/NSW-ICPMR-16587/2021	BA.1.17	M:I82T, N:R203M, ORF1a:P2046L, S:L452R
hCoV-19/Australia/NSW-ICPMR-16592/2021	BA.1.17	M:I82T, N:R203M, ORF1a:P2046L, S:L452R
hCoV-19/USA/TX-HMH-MCoV-68811/2021	BA.1.15	M:I82T, N:R203M, ORF1a:P2046L, S:L452R
hCoV-19/Australia/NSW-ICPMR-17516/2021	BA.1.17	M:I82T, N:R203M, ORF1a:P2046L, S:L452R
hCoV-19/Belgium/MBLG-CTMAPF73019660/2021	BA.1.14	M:I82T, N:R203M, ORF1a:P2046L, S:L452R
hCoV-19/USA/TX-HMH-MCoV-69020/2021	BA.1.15	M:I82T, N:R203M, ORF1a:P2046L, S:L452R
hCoV-19/Australia/NSW-ICPMR-17594/2021	BA.1.17	M:I82T, N:R203M, ORF1a:P2046L, S:L452R
hCoV-19/Russia/SPE-RII-MH46495S/2021	BA.1.15	M:I82T, ORF1a:P2046L, S:L452R
hCoV-19/USA/AZ-CDC-ASC210536870/2021	BA.1	M:I82T, N:R203M, ORF1a:P2046L, S:L452R
hCoV-19/Germany/ST-RKI-I-405378/2021	BA.1	M:I82T, ORF1a:P2046L, S:L452R
hCoV-19/Germany/ST-RKI-I-405410/2021	BA.1	M:I82T, ORF1a:P2046L, S:L452R
hCoV-19/Germany/NI-RKI-I-408801/2021	BA.1	M:I82T, ORF1a:P2046L, S:L452R
hCoV-19/USA/MN-CDC-IBX321945610587/2021	BA.1.17	M:I82T, ORF1a:P2046L, S:L452R
hCoV-19/USA/MN-CDC-IBX184140742855/2021	BA.1.1.11	M:I82T, N:R203M, ORF1a:P2046L, S:L452R
hCoV-19/Italy/SIC-CQRC-3051417/2021	BA.1.17	M:I82T, ORF1a:P2046L, S:L452R
hCoV-19/USA/CA-SEARCH-114505/2021	BA.1.15	M:I82T, N:R203M, ORF1a:P2046L, S:L452R
hCoV-19/USA/NJ-CDC-IBX335904617917/2021	BA.1.15	M:I82T, N:R203M, ORF1a:P2046L, S:L452R
hCoV-19/USA/FL-CDC-ASC210638096/2021	BA.1.1	M:I82T, ORF1a:P2046L, S:L452R
hCoV-19/USA/LA-BIE-LSUH002531/2021	BA.1.15	M:I82T, N:R203M, ORF1a:P2046L, S:L452R
hCoV-19/USA/LA-BIE-LSUH002500/2021	BA.1.15	M:I82T, N:R203M, ORF1a:P2046L, S:L452R
hCoV-19/USA/TX-HMH-MCoV-69996/2021	BA.1.15	M:I82T, ORF1a:P2046L, S:L452R
hCoV-19/USA/NY-CDC-IBX214643677749/2021	BA.1.4	M:I82T, ORF1a:P2046L, S:L452R
hCoV-19/USA/TX-Curative-153802/2021	BA.1.15	M:I82T, ORF1a:P2046L, S:L452R
hCoV-19/env/Austria/CeMM21569/2021	BA.1.15	M:I82T, N:R203M, ORF1a:P2046L, S:L452R
hCoV-19/USA/AR-UMGC-29096/2021	BA.1.15	M:I82T, ORF1a:P2046L, S:L452R
hCoV-19/USA/AR-UMGC-29109/2021	BA.1.1.15	M:I82T, ORF1a:P2046L, S:L452R
hCoV-19/USA/NJ-CDC-ASC210500114/2021	BA.1.15	M:I82T, ORF1a:P2046L, S:L452R
hCoV-19/USA/MD-CDC-ASC210575213/2021	BA.1.15	M:I82T, N:R203M, ORF1a:P2046L, S:L452R
hCoV-19/USA/MA-CDCBI-CRSP_ZZ3MGCW6NFTHJSWO/2022	BA.1.1.1	M:I82T, N:R203M, ORF1a:P2046L, S:L452R
hCoV-19/Australia/NSW-ICPMR-19195/2022	BA.1.17	M:I82T, N:R203M, ORF1a:P2046L, S:L452R
hCoV-19/env/USA/CA-SEARCH-63652/2021	BA.1.15	M:I82T, ORF1a:P2046L, S:L452R
hCoV-19/env/USA/CA-SEARCH-63667/2021	BA.1.1	M:I82T, ORF1a:P2046L, S:L452R
hCoV-19/env/USA/CA-SEARCH-63675/2021	BA.1.13.1	M:I82T, ORF1a:P2046L, S:L452R
hCoV-19/USA/NJ-CDC-IBX943184308567/2022	BA.1.1.11	M:I82T, ORF1a:P2046L, S:L452R
hCoV-19/USA/IL-CDC-ASC210499914/2021	BA.1.15	M:I82T, ORF1a:P2046L, S:L452R
hCoV-19/env/Austria/CeMM21835/2022	BA.1.9	M:I82T, N:R203M, ORF1a:P2046L, S:L452R
hCoV-19/USA/PA-CDC-ASC210564769/2022	BA.1.15	M:I82T, ORF1a:P2046L, S:L452R
hCoV-19/env/Austria/CeMM22337/2022	BA.1.17	M:I82T, ORF1a:P2046L, S:L452R
hCoV-19/USA/NY-SUNYQBR-55210127608584/2021	BA.1.1.11	M:I82T, ORF1a:P2046L, S:L452R
hCoV-19/USA/NY-SUNYQBR-61210550417776/2021	BA.1.15	M:I82T, ORF1a:P2046L, S:L452R
hCoV-19/USA/NY-SUNYQBR-55210128203827/2021	BA.1.1.11	M:I82T, ORF1a:P2046L, S:L452R
hCoV-19/USA/NY-SUNYQBR-61210553702795/2021	BA.1.1.1	M:I82T, ORF1a:P2046L, S:L452R
hCoV-19/USA/NY-SUNYQBR-61210501322676/2021	BA.1.1.15	M:I82T, ORF1a:P2046L, S:L452R
hCoV-19/USA/NY-SUNYQBR-61020032904758/2021	BA.1.1	M:I82T, ORF1a:P2046L, S:L452R
hCoV-19/USA/NY-SUNYQBR-61210553702753/2021	BA.1.15	M:I82T, ORF1a:P2046L, S:L452R
hCoV-19/USA/NY-SUNYQBR-61210553706569/2021	BA.1.15	M:I82T, ORF1a:P2046L, S:L452R
hCoV-19/USA/NY-SUNYQBR-61020032904652/2021	BA.1.1.1	M:I82T, ORF1a:P2046L, S:L452R
hCoV-19/USA/NY-SUNYQBR-61210301722233/2021	BA.1.9	M:I82T, ORF1a:P2046L, S:L452R
hCoV-19/USA/NY-SUNYQBR-61210353410021/2021	BA.1.9	M:I82T, ORF1a:P2046L, S:L452R
hCoV-19/USA/NY-SUNYQBR-61020032904730/2021	BA.1.1.15	M:I82T, ORF1a:P2046L, S:L452R
hCoV-19/USA/NY-SUNYQBR-61210553703371/2021	BA.1.15	M:I82T, ORF1a:P2046L, S:L452R
hCoV-19/USA/NY-SUNYQBR-61210400604811/2021	BA.1.1.1	M:I82T, N:R203M, ORF1a:P2046L, S:L452R
hCoV-19/USA/NY-SUNYQBR-61210553706602/2021	BA.1.15	M:I82T, ORF1a:P2046L, S:L452R
hCoV-19/USA/VA-VCUVAS3-SSHC497051/2021	BA.1	M:I82T, N:R203M, ORF1a:P2046L, S:L452R
hCoV-19/USA/TX-HMH-MCoV-71248/2021	BA.1.15	M:I82T, ORF1a:P2046L, S:L452R
hCoV-19/USA/TX-HMH-MCoV-73101/2022	BA.1.15	M:I82T, ORF1a:P2046L, S:L452R
hCoV-19/Germany/ST-RKI-I-471193/2022	BA.1.1.1	M:I82T, ORF1a:P2046L, S:L452R
hCoV-19/Germany/ST-RKI-I-471210/2022	BA.1.1.1	M:I82T, ORF1a:P2046L, S:L452R
hCoV-19/USA/AZ-ASU37756/2022	BA.1.1.1	M:I82T, ORF1a:P2046L, S:L452R
hCoV-19/Turkey/HSGM-F17325/2022	BA.1.15	M:I82T, N:R203M, ORF1a:P2046L, S:L452R
hCoV-19/Russia/KL-RII-MH50646S/2022	BA.1.1	M:I82T, ORF1a:P2046L, S:L452R
hCoV-19/Russia/MAG-RII-MH54245S/2022	BA.1.15	M:I82T, ORF1a:P2046L, S:L452R
hCoV-19/USA/TX-HMH-MCoV-71836/2021	BA.1.15	M:I82T, ORF1a:P2046L, S:L452R
hCoV-19/India/PY-CBR-SEQ-10758/2021	BA.1.1.7	M:I82T, ORF1a:P2046L, S:L452R
hCoV-19/India/KA-CBR-SEQ-11119/2022	BA.2	M:I82T, ORF1a:P2046L, S:L452R
hCoV-19/India/KA-CBR-SEQ-11083/2022	BA.2.3	M:I82T, ORF1a:P2046L, S:L452R
hCoV-19/India/KA-CBR-SEQ-11088/2022	BA.2	M:I82T, ORF1a:P2046L, S:L452R
hCoV-19/India/KA-CBR-SEQ-11065/2022	BA.2	M:I82T, ORF1a:P2046L, S:L452R
hCoV-19/India/KA-CBR-SEQ-11077/2022	BA.2	M:I82T, ORF1a:P2046L, S:L452R
hCoV-19/India/KA-CBR-SEQ-11081/2022	BA.2.3	M:I82T, ORF1a:P2046L, S:L452R
hCoV-19/India/PY-CBR-SEQ-10778/2021	BA.1.1.7	M:I82T, ORF1a:P2046L, S:L452R
hCoV-19/India/KA-CBR-SEQ-11084/2022	BA.2	M:I82T, ORF1a:P2046L, S:L452R
hCoV-19/India/TN-CBR-SEQ-10783/2021	BA.1.1.7	M:I82T, ORF1a:P2046L, S:L452R
hCoV-19/India/PY-CBR-SEQ-10812/2022	BA.1.1	M:I82T, ORF1a:P2046L, S:L452R
hCoV-19/India/PY-CBR-SEQ-10813/2021	BA.1.1.7	M:I82T, ORF1a:P2046L, S:L452R
hCoV-19/India/KA-CBR-SEQ-11100/2022	BA.1.15	M:I82T, ORF1a:P2046L, S:L452R
hCoV-19/India/KA-CBR-SEQ-11110/2022	BA.2	M:I82T, ORF1a:P2046L, S:L452R
hCoV-19/USA/UT-UPHL-220202522366/2022	BA.1.1	M:I82T, ORF1a:P2046L, S:L452R
hCoV-19/USA/WA-PHL-010989/2022	BA.1.15	M:I82T, N:R203M, ORF1a:P2046L, S:L452R
hCoV-19/USA/WA-CDC-UW22012528992/2022	BA.1.1	M:I82T, ORF1a:P2046L, S:L452R
hCoV-19/USA/AZ-ASU40527/2022	BA.1.1.1	M:I82T, ORF1a:P2046L, S:L452R
hCoV-19/Switzerland/AG-ETHZ-35740439/2022	BA.1.15	M:I82T, ORF1a:P2046L, S:L452R
hCoV-19/USA/CA-SEARCH-66485/2021	BA.1.15	M:I82T, ORF1a:P2046L, S:L452R
hCoV-19/USA/CA-SEARCH-66729/2022	BA.1.15	M:I82T, ORF1a:P2046L, S:L452R
hCoV-19/USA/CA-SEARCH-67994/2022	BA.1.15	M:I82T, ORF1a:P2046L, S:L452R
hCoV-19/USA/CA-SEARCH-67995/2022	BA.1.15	M:I82T, ORF1a:P2046L, S:L452R
hCoV-19/India/RJ-SMS-ICMR-INSACOG-TS-1276/2021	BA.1.15	M:I82T, ORF1a:P2046L, S:L452R
hCoV-19/France/IDF-HMN-22012310488/2022	BA.1.16	M:I82T, N:R203M, ORF1a:P2046L, S:L452R
hCoV-19/USA/TX-CDC-ASC210626961/2021	BA.1.15	M:I82T, S:L452R
hCoV-19/England/MILK-2F45820/2021	BA.1.15	M:I82T, S:L452R
hCoV-19/USA/MN-CDC-IBX841238257391/2021	BA.1.1.11	M:I82T, S:L452R
hCoV-19/England/NEWC-2FD54F4/2021	BA.1.17	M:I82T, S:L452R
hCoV-19/USA/MN-CDC-IBX386767323169/2021	BA.1.15	M:I82T, N:R203M, S:L452R
hCoV-19/USA/IN-CDC-ASC210627984/2021	BA.1.15	M:I82T, S:L452R
hCoV-19/USA/MN-CDC-IBX523070836568/2021	BA.1.15	M:I82T, N:R203M, S:L452R
hCoV-19/England/LSPA-2FC092A/2021	BA.1.15	M:I82T, S:L452R
hCoV-19/USA/MN-CDC-IBX314791882999/2021	BA.1.1.11	M:I82T, N:R203M, S:L452R
hCoV-19/USA/PA-CDC-MMB12292007/2021	BA.1.15	S:L452R
hCoV-19/USA/OH-CDC-MMB12313082/2021	BA.1.1.12	S:L452R
hCoV-19/Italy/SIC-CQRC-3077481/2021	BA.1.1.1	S:L452R
hCoV-19/USA/UT-UPHL-211230502262/2021	BA.1.15	M:I82T, S:L452R
hCoV-19/USA/MD-CDC-MMB12239876/2021	BA.1.17	M:I82T, S:L452R
hCoV-19/Italy/SIC-CQRC-3076227/2021	BA.1.17	S:L452R
hCoV-19/Germany/SH-RKI-I-389998/2021	BA.1.15	S:L452R
hCoV-19/Italy/SIC-CQRC-3023808/2021	BA.1.15	S:L452R
hCoV-19/Italy/EMR_AUSLRomagna_C120-21-11/2021	BA.1.17	S:L452R
hCoV-19/USA/MN-CDC-IBX755143250828/2021	BA.1.1.11	M:I82T, N:R203M, S:L452R
hCoV-19/USA/MN-CDC-IBX405756380044/2021	BA.1.1	M:I82T, S:L452R
hCoV-19/England/NEWC-2FDD7A8/2021	BA.1.17	M:I82T, S:L452R
hCoV-19/USA/MN-CDC-IBX904006592571/2021	BA.1.1	M:I82T, S:L452R
hCoV-19/USA/MN-CDC-IBX082467524486/2021	BA.1.15	M:I82T, S:L452R
hCoV-19/USA/MN-CDC-IBX094460539980/2021	BA.1.15	M:I82T, N:R203M, S:L452R
hCoV-19/USA/MN-CDC-IBX924030197304/2021	BA.1.1	M:I82T, S:L452R
hCoV-19/USA/MN-CDC-IBX105105015219/2021	BA.1.15	M:I82T, N:R203M, S:L452R
hCoV-19/England/QEUH-2FBFDC8/2021	BA.1.15	M:I82T, S:L452R
hCoV-19/USA/MN-CDC-IBX048799973123/2021	BA.1.1	M:I82T, S:L452R
hCoV-19/USA/MN-CDC-IBX647262772965/2021	BA.1.1	M:I82T, S:L452R
hCoV-19/USA/MN-CDC-IBX589432162061/2021	BA.1.15	M:I82T, S:L452R
hCoV-19/USA/TX-HMH-MCoV-69000/2021	BA.1.15	S:L452R
hCoV-19/USA/MN-CDC-IBX433653821126/2021	BA.1.1.15	M:I82T, S:L452R
hCoV-19/Italy/SIC-CQRC-3077827/2021	BA.1.15	S:L452R
hCoV-19/Germany/NW-RKI-I-408656/2021	BA.1.1.15	M:I82T, S:L452R
hCoV-19/USA/MN-CDC-IBX413931514482/2021	BA.1.15	M:I82T, S:L452R
hCoV-19/USA/MN-CDC-IBX342048683588/2021	BA.1.1.11	M:I82T, N:R203M, S:L452R
hCoV-19/Italy/SIC-CQRC-3069162/2021	BA.1.17	S:L452R
hCoV-19/USA/NJ-CDC-IBX367303576353/2021	BA.1.1	M:I82T, S:L452R
hCoV-19/USA/MN-CDC-IBX150847836310/2021	BA.1.15	M:I82T, N:R203M, S:L452R
hCoV-19/Germany/NI-RKI-I-408803/2021	BA.1.1.1	S:L452R
hCoV-19/USA/MN-CDC-IBX488023066568/2021	BA.1.1.11	M:I82T, N:R203M, S:L452R
hCoV-19/Italy/SIC-CQRC-3069080/2021	BA.1.15	S:L452R
hCoV-19/USA/IL-CDC-ASC210630113/2021	BA.1.15	M:I82T, N:R203M, S:L452R
hCoV-19/England/MILK-3005CE0/2021	BA.1.17	M:I82T, S:L452R
hCoV-19/USA/CA-CDC-ASC210634945/2021	BA.1.15	M:I82T, S:L452R
hCoV-19/USA/NJ-CDC-ASC210634662/2021	BA.1.15	M:I82T, N:R203M, S:L452R
hCoV-19/England/MILK-30234A8/2021	BA.1.17	M:I82T, S:L452R
hCoV-19/USA/CA-CDC-FG-211928/2021	BA.1	N:R203M, S:L452R
hCoV-19/Italy/LOM-Policlinico-Milano-87693471/2021	BA.1.15	S:L452R
hCoV-19/England/PLYM-2FCE458/2021	BA.1.16	M:I82T, S:L452R
hCoV-19/Italy/SIC-CQRC-3421142755/2021	BA.1.12	S:L452R
hCoV-19/Scotland/QEUH-2FC10CA/2021	BA.1.1	M:I82T, S:L452R
hCoV-19/England/ALDP-3031708/2021	BA.1.17	M:I82T, S:L452R
hCoV-19/USA/OH-CDC-ASC210627757/2021	BA.1.1.15	M:I82T, S:L452R
hCoV-19/USA/TX-HMH-MCoV-69259/2021	BA.1.15	M:I82T, S:L452R
hCoV-19/Italy/SIC-CQRC-3069261/2021	BA.1.15	S:L452R
hCoV-19/USA/TX-HMH-MCoV-69317/2021	BA.1.15	M:I82T, S:L452R
hCoV-19/USA/TX-HMH-MCoV-69312/2021	BA.1.15	M:I82T, S:L452R
hCoV-19/England/ALDP-2F84B95/2021	BA.1.1	M:I82T, S:L452R
hCoV-19/USA/TX-HMH-MCoV-69420/2021	BA.1.15	M:I82T, S:L452R
hCoV-19/USA/TX-HMH-MCoV-69139/2021	BA.1.15	M:I82T, S:L452R
hCoV-19/USA/TX-HMH-MCoV-69156/2021	BA.1.15	M:I82T, S:L452R
hCoV-19/USA/TX-HMH-MCoV-69269/2021	BA.1.15	M:I82T, S:L452R
hCoV-19/USA/TX-HMH-MCoV-69189/2021	BA.1.15	M:I82T, S:L452R
hCoV-19/England/NEWC-2F98ED1/2021	BA.1.17	M:I82T, S:L452R
hCoV-19/USA/TX-HMH-MCoV-69117/2021	BA.1.15	M:I82T, S:L452R
hCoV-19/England/MILK-2EEFA32/2021	BA.1.15	M:I82T, S:L452R
hCoV-19/USA/TX-HMH-MCoV-69307/2021	BA.1.15	M:I82T, S:L452R
hCoV-19/USA/TX-HMH-MCoV-69168/2021	BA.1.1.16	M:I82T, S:L452R
hCoV-19/USA/TX-HMH-MCoV-69305/2021	BA.1.15	M:I82T, S:L452R
hCoV-19/England/QEUH-2FA1BA1/2021	BA.1.17	M:I82T, S:L452R
hCoV-19/USA/TX-HMH-MCoV-69129/2021	BA.1.15	M:I82T, S:L452R
hCoV-19/USA/TX-HMH-MCoV-69248/2021	BA.1.15	M:I82T, N:R203M, S:L452R
hCoV-19/England/MILK-2E6AFB8/2021	BA.1.17	S:L452R
hCoV-19/England/MILK-2EFB4F9/2021	BA.1.15	M:I82T, S:L452R
hCoV-19/USA/TX-HMH-MCoV-69170/2021	BA.1.15	M:I82T, S:L452R
hCoV-19/USA/TX-HMH-MCoV-69392/2021	BA.1.15	M:I82T, S:L452R
hCoV-19/USA/TX-HMH-MCoV-69258/2021	BA.1.15	M:I82T, S:L452R
hCoV-19/USA/TX-HMH-MCoV-69179/2021	BA.1.15	M:I82T, S:L452R
hCoV-19/USA/IL-CDC-ASC210532185/2021	BA.1.15	M:I82T, S:L452R
hCoV-19/USA/TX-HMH-MCoV-69237/2021	BA.1.15	M:I82T, S:L452R
hCoV-19/USA/TX-HMH-MCoV-69257/2021	BA.1.15	M:I82T, S:L452R
hCoV-19/USA/TX-HMH-MCoV-69328/2021	BA.1.15	M:I82T, S:L452R
hCoV-19/USA/TX-HMH-MCoV-69290/2021	BA.1.15	M:I82T, S:L452R
hCoV-19/USA/TX-HMH-MCoV-69326/2021	BA.1.15	M:I82T, S:L452R
hCoV-19/USA/TX-HMH-MCoV-69235/2021	BA.1.15	M:I82T, S:L452R
hCoV-19/USA/TX-HMH-MCoV-69167/2021	BA.1.15	M:I82T, S:L452R
hCoV-19/USA/TX-HMH-MCoV-69216/2021	BA.1.15	M:I82T, S:L452R
hCoV-19/England/PHEP-YYNW3DS/2021	BA.1.15	S:L452R
hCoV-19/Wales/PHWC-PGG1SI/2021	BA.1.17	M:I82T, S:L452R
hCoV-19/USA/TX-HMH-MCoV-69334/2021	BA.1.15	M:I82T, S:L452R
hCoV-19/USA/TX-HMH-MCoV-69218/2021	BA.1.15	M:I82T, S:L452R
hCoV-19/England/MILK-2F942F7/2021	BA.1.17	M:I82T, S:L452R
hCoV-19/England/ALDP-2ED3424/2021	BA.1.17	M:I82T, S:L452R
hCoV-19/USA/TX-HMH-MCoV-69325/2021	BA.1.15	M:I82T, S:L452R
hCoV-19/USA/FL-CDC-ASC210534084/2021	BA.1.1	M:I82T, S:L452R
hCoV-19/USA/TX-HMH-MCoV-69095/2021	BA.1.15	M:I82T, S:L452R
hCoV-19/Spain/CT-HUGTiPM064VN6H2/2021	BA.1.15	M:I82T, S:L452R
hCoV-19/USA/TX-HMH-MCoV-69335/2021	BA.1.15	M:I82T, S:L452R
hCoV-19/USA/TX-HMH-MCoV-69238/2021	BA.1.15	M:I82T, S:L452R
hCoV-19/USA/TX-HMH-MCoV-69293/2021	BA.1.15	M:I82T, S:L452R
hCoV-19/USA/TX-HMH-MCoV-69287/2021	BA.1.15	S:L452R
hCoV-19/USA/TX-HMH-MCoV-69097/2021	BA.1.15	M:I82T, S:L452R
hCoV-19/Russia/SPE-RII-6180S/2021	BA.1.1	M:I82T, S:L452R
hCoV-19/Russia/SPE-RII-5994V1/2021	BA.1.1	M:I82T, S:L452R
hCoV-19/England/MILK-2EF154B/2021	BA.1.17	M:I82T, S:L452R
hCoV-19/USA/TX-HMH-MCoV-69166/2021	BA.1.15	M:I82T, S:L452R
hCoV-19/England/MILK-2F1D0ED/2021	BA.1.9	M:I82T, S:L452R
hCoV-19/USA/TX-HMH-MCoV-69298/2021	BA.1.15	M:I82T, S:L452R
hCoV-19/USA/TX-HMH-MCoV-69314/2021	BA.1.15	M:I82T, S:L452R
hCoV-19/England/ALDP-2ECAC73/2021	BA.1.17	M:I82T, S:L452R
hCoV-19/England/MILK-2F105BE/2021	BA.1.17	M:I82T, S:L452R
hCoV-19/USA/TX-HMH-MCoV-69226/2021	BA.1.15	M:I82T, S:L452R
hCoV-19/USA/TX-HMH-MCoV-69332/2021	BA.1.15	M:I82T, S:L452R
hCoV-19/USA/IL-CDC-ASC210625362/2021	BA.1.1.16	M:I82T, S:L452R
hCoV-19/England/PHEC-3W03FW67/2021	BA.1.15	S:L452R
hCoV-19/USA/TX-HMH-MCoV-69213/2021	BA.1.15	M:I82T, S:L452R
hCoV-19/England/PHEP-YYNWHBZ/2021	BA.1.12	S:L452R
hCoV-19/USA/TX-HMH-MCoV-69322/2021	BA.1.15	M:I82T, N:R203M, S:L452R
hCoV-19/England/MILK-2EC4DA3/2021	BA.1.15	M:I82T, S:L452R
hCoV-19/England/MILK-2F20D3B/2021	BA.1.17	S:L452R
hCoV-19/USA/UT-UPHL-211224287024/2021	BA.1.1	S:L452R
hCoV-19/England/MILK-2F0EF6A/2021	BA.1.16	M:I82T, S:L452R
hCoV-19/USA/TX-HMH-MCoV-69115/2021	BA.1.15	M:I82T, S:L452R
hCoV-19/Russia/SPE-RII-6379S/2021	BA.1.1	M:I82T, S:L452R
hCoV-19/England/PLYM-2F491C7/2021	BA.1.17	M:I82T, S:L452R
hCoV-19/England/QEUH-2F6AB68/2021	BA.1.17	M:I82T, S:L452R
hCoV-19/England/ALDP-2F304D9/2021	BA.1.17	M:I82T, S:L452R
hCoV-19/USA/TX-HMH-MCoV-69261/2021	BA.1.15	M:I82T, S:L452R
hCoV-19/USA/TX-HMH-MCoV-69209/2021	BA.1.15	M:I82T, S:L452R
hCoV-19/England/MILK-2F4831D/2021	BA.1.1	S:L452R
hCoV-19/USA/TX-HMH-MCoV-69256/2021	BA.1.15	M:I82T, S:L452R
hCoV-19/USA/TX-HMH-MCoV-69398/2021	BA.1.15	M:I82T, S:L452R
hCoV-19/England/MILK-2F52E97/2021	BA.1.15	M:I82T, S:L452R
hCoV-19/Russia/SPE-RII-6343S/2021	BA.1.1	M:I82T, S:L452R
hCoV-19/England/MILK-2EED59D/2021	BA.1.17	M:I82T, S:L452R
hCoV-19/USA/TX-HMH-MCoV-69249/2021	BA.1.15	M:I82T, S:L452R
hCoV-19/USA/TX-HMH-MCoV-69281/2021	BA.1.15	M:I82T, S:L452R
hCoV-19/USA/WA-CDC-UW21121730337/2021	BA.1.15	S:L452R
hCoV-19/USA/TX-HMH-MCoV-69106/2021	BA.1.15	M:I82T, S:L452R
hCoV-19/England/PHWC-PGRXQP/2021	BA.1.17	M:I82T, N:R203M, S:L452R
hCoV-19/USA/TX-HMH-MCoV-69194/2021	BA.1.15	M:I82T, S:L452R
hCoV-19/Russia/SPE-RII-6350S/2021	BA.1.1	M:I82T, S:L452R
hCoV-19/USA/TX-HMH-MCoV-69294/2021	BA.1.15	M:I82T, S:L452R
hCoV-19/USA/TX-HMH-MCoV-69277/2021	BA.1.15	M:I82T, S:L452R
hCoV-19/USA/TX-HMH-MCoV-69282/2021	BA.1.15	M:I82T, S:L452R
hCoV-19/USA/TX-HMH-MCoV-69015/2021	BA.1.15	M:I82T, S:L452R
hCoV-19/USA/TX-HMH-MCoV-69104/2021	BA.1.15	M:I82T, S:L452R
hCoV-19/USA/TX-HMH-MCoV-69098/2021	BA.1.15	M:I82T, S:L452R
hCoV-19/USA/TX-HMH-MCoV-69143/2021	BA.1.15	M:I82T, S:L452R
hCoV-19/USA/TX-HMH-MCoV-69240/2021	BA.1.15	M:I82T, S:L452R
hCoV-19/USA/TX-HMH-MCoV-69014/2021	BA.1.15	M:I82T, S:L452R
hCoV-19/England/MILK-2E851C0/2021	BA.1.16	M:I82T, S:L452R
hCoV-19/England/ALDP-2DB467F/2021	BA.1.17	S:L452R
hCoV-19/USA/TX-HMH-MCoV-68925/2021	BA.1.15	M:I82T, S:L452R
hCoV-19/USA/TX-HMH-MCoV-69012/2021	BA.1.15	M:I82T, S:L452R
hCoV-19/USA/IL-NM-13815/2021	BA.1.15	S:L452R
hCoV-19/USA/TX-HMH-MCoV-68646/2021	BA.1.1	M:I82T, S:L452R
hCoV-19/USA/TX-HMH-MCoV-68842/2021	BA.1.15	M:I82T, S:L452R
hCoV-19/USA/TX-HMH-MCoV-68583/2021	BA.1.1.14	M:I82T, S:L452R
hCoV-19/Switzerland/ZH-ETHZ-35226352/2021	BA.1.15	S:L452R
hCoV-19/England/MILK-2E96A1C/2021	BA.1.16	M:I82T, S:L452R
hCoV-19/England/MILK-2E76AF4/2021	BA.1.17	M:I82T, S:L452R
hCoV-19/England/BRBR-2E5D98D/2021	BA.1.16	S:L452R
hCoV-19/USA/TX-HMH-MCoV-69056/2021	BA.1.15	M:I82T, S:L452R
hCoV-19/England/BRBR-2EB3721/2021	BA.1.1	M:I82T, S:L452R
hCoV-19/USA/IL-NM-13713/2021	BA.1.9	N:R203M, S:L452R
hCoV-19/USA/TX-HMH-MCoV-68827/2021	BA.1.15	M:I82T, S:L452R
hCoV-19/USA/TX-HMH-MCoV-68901/2021	BA.1.15	M:I82T, S:L452R
hCoV-19/England/MILK-2E0A406/2021	BA.1.17	M:I82T, S:L452R
hCoV-19/Germany/BE-RKI-I-376943/2021	BA.1.15	M:I82T, S:L452R
hCoV-19/USA/TX-HMH-MCoV-68837/2021	BA.1.15	M:I82T, S:L452R
hCoV-19/USA/TX-HMH-MCoV-68741/2021	BA.1.15	M:I82T, S:L452R
hCoV-19/England/MILK-2E952E8/2021	BA.1.9	M:I82T, S:L452R
hCoV-19/USA/TX-HMH-MCoV-68606/2021	BA.1.15	N:R203M, S:L452R
hCoV-19/USA/TX-HMH-MCoV-68695/2021	BA.1.15	M:I82T, S:L452R
hCoV-19/England/MILK-2E8B5A0/2021	BA.1	M:I82T, S:L452R
hCoV-19/USA/TX-HMH-MCoV-68807/2021	BA.1.15	M:I82T, S:L452R
hCoV-19/USA/TX-HMH-MCoV-68823/2021	BA.1.15	M:I82T, S:L452R
hCoV-19/USA/TX-HMH-MCoV-68822/2021	BA.1.15	M:I82T, S:L452R
hCoV-19/Italy/TAA-PAB_SABES_1900767000/2021	BA.1.14	S:L452R
hCoV-19/England/MILK-2E597B4/2021	BA.1.16	M:I82T, S:L452R
hCoV-19/USA/TX-HMH-MCoV-68927/2021	BA.1.15	M:I82T, S:L452R
hCoV-19/USA/TX-HMH-MCoV-68808/2021	BA.1.15	M:I82T, S:L452R
hCoV-19/USA/TX-HMH-MCoV-68806/2021	BA.1.15	M:I82T, S:L452R
hCoV-19/USA/TX-HMH-MCoV-69018/2021	BA.1.15	M:I82T, S:L452R
hCoV-19/USA/TX-HMH-MCoV-68691/2021	BA.1.15	M:I82T, S:L452R
hCoV-19/USA/TX-HMH-MCoV-69049/2021	BA.1.9	M:I82T, S:L452R
hCoV-19/USA/TX-HMH-MCoV-68815/2021	BA.1.15	M:I82T, S:L452R
hCoV-19/USA/TX-HMH-MCoV-68803/2021	BA.1.15	M:I82T, S:L452R
hCoV-19/USA/TX-HMH-MCoV-68951/2021	BA.1.15	M:I82T, S:L452R
hCoV-19/SouthAfrica/NICD-N21756/2021	BA.1.1.1	S:L452R
hCoV-19/England/MILK-2D0B891/2021	BA.1.15	M:I82T, S:L452R
hCoV-19/USA/TX-HMH-MCoV-68791/2021	BA.1.15	M:I82T, S:L452R
hCoV-19/USA/TX-HMH-MCoV-68793/2021	BA.1.15	M:I82T, S:L452R
hCoV-19/England/MILK-2E61B53/2021	BA.1.17	M:I82T, S:L452R
hCoV-19/USA/TX-HMH-MCoV-69093/2021	BA.1.15	M:I82T, S:L452R
hCoV-19/England/MILK-2E7CCDA/2021	BA.1.17	M:I82T, S:L452R
hCoV-19/USA/TX-HMH-MCoV-68974/2021	BA.1.15	M:I82T, N:R203M, S:L452R
hCoV-19/England/ALDP-2ECC8B9/2021	BA.1.17	M:I82T, S:L452R
hCoV-19/England/MILK-2DF66CC/2021	BA.1.17	M:I82T, S:L452R
hCoV-19/USA/TX-HMH-MCoV-68610/2021	BA.1.15	M:I82T, S:L452R
hCoV-19/England/MILK-2E3601C/2021	BA.1.9	M:I82T, S:L452R
hCoV-19/USA/TX-HMH-MCoV-68998/2021	BA.1.15	M:I82T, S:L452R
hCoV-19/England/BRBR-2EB4465/2021	BA.1.17	M:I82T, S:L452R
hCoV-19/USA/TX-HMH-MCoV-68528/2021	BA.1.15	M:I82T, S:L452R
hCoV-19/Scotland/QEUH-2D972E7/2021	BA.1.15	M:I82T, S:L452R
hCoV-19/England/BRBR-2DC22B6/2021	BA.1.16	S:L452R
hCoV-19/USA/TX-HMH-MCoV-68994/2021	BA.1.15	M:I82T, S:L452R
hCoV-19/USA/TX-HMH-MCoV-68989/2021	BA.1.15	M:I82T, S:L452R
hCoV-19/USA/TX-HMH-MCoV-68513/2021	BA.1.15	M:I82T, S:L452R
hCoV-19/USA/TX-HMH-MCoV-68987/2021	BA.1.15	M:I82T, S:L452R
hCoV-19/USA/TX-HMH-MCoV-68986/2021	BA.1.15	M:I82T, S:L452R
hCoV-19/USA/TX-HMH-MCoV-68955/2021	BA.1.15	M:I82T, S:L452R
hCoV-19/USA/TX-HMH-MCoV-68954/2021	BA.1.15	M:I82T, S:L452R
hCoV-19/USA/TX-HMH-MCoV-68534/2021	BA.1.15	M:I82T, S:L452R
hCoV-19/Israel/ICH-741108846/2021	BA.1.14	S:L452R
hCoV-19/USA/AZ-ASU29957/2021	BA.1.9	S:L452R
hCoV-19/Israel/ICH-741109194/2021	BA.1.17	S:L452R
hCoV-19/France/ARA-CFD700000272748/2021	BA.1.4	S:L452R
hCoV-19/Luxembourg/LNS2670139/2021	BA.1.14	S:L452R
hCoV-19/Lithuania/MR-LUHS-31-30/2021	BA.1.17	S:L452R
hCoV-19/Lithuania/MR-LUHS-31-41/2021	BA.1.12	S:L452R
hCoV-19/Belgium/MBLG-CTMAPF25633268/2021	BA.1.15	S:L452R
hCoV-19/Belgium/MBLG-CTMAPF18879543/2021	BA.1	S:L452R
hCoV-19/Italy/ABR-IZSGC-318792/2021	BA.1.15	S:L452R
hCoV-19/India/MH-RFIP06495/2021	BA.1.15	S:L452R
hCoV-19/India/MH-RFIP06522/2021	BA.1.1.1	S:L452R
hCoV-19/Pakistan/DUHS28/2021	BA.1.1.11	S:L452R
hCoV-19/USA/UT-UPHL-220103955905/2021	BA.1.1	S:L452R
hCoV-19/USA/UT-UPHL-220103543550/2021	BA.1.1	S:L452R
hCoV-19/USA/MS-MSPHL-0719/2021	BA.1.1.1	S:L452R
hCoV-19/USA/MS-MSPHL-0722/2021	BA.1.1	S:L452R
hCoV-19/USA/WA-CDC-UW21121874258/2021	BA.1.15	S:L452R
hCoV-19/USA/AZ-ASU26315/2021	BA.1.9	M:I82T, S:L452R
hCoV-19/USA/AZ-ASU29088/2021	BA.1.15	M:I82T, N:R203M, S:L452R
hCoV-19/Israel/ICH-741107767/2021	BA.1.17	S:L452R
hCoV-19/USA/TX-BSWTemple-ILL-R31-0029/2021	BA.1.15	S:L452R
hCoV-19/Turkey/HSGM-F11547/2021	BA.1.1.1	N:R203M, S:L452R
hCoV-19/Turkey/HSGM-F12339/2021	BA.1.14	S:L452R
hCoV-19/Israel/ICH-741107837/2021	BA.1.15	M:I82T, S:L452R
hCoV-19/USA/AZ-ASU29842/2021	BA.1.9	M:I82T, N:R203M, S:L452R
hCoV-19/Turkey/HSGM-F12344/2021	BA.1.14	S:L452R
hCoV-19/USA/WA-CDC-UW21120947663/2021	BA.1.15	S:L452R
hCoV-19/USA/WA-CDC-UW21121806035/2021	BA.1.4	M:I82T, S:L452R
hCoV-19/Indonesia/JK-NIHRD-WGS14722/2021	BA.1.14	M:I82T, N:R203M, S:L452R
hCoV-19/USA/WA-CDC-UW21121891299/2021	BA.1.15	S:L452R
hCoV-19/USA/MA-NEIDL-02633/2021	BA.1.1	N:R203M, S:L452R
hCoV-19/Turkey/HSGM-F12343/2021	BA.1.15	S:L452R
hCoV-19/India/GJ-INSACOG-GBRC3348/2021	BA.1.1.11	M:I82T, S:L452R
hCoV-19/USA/WA-CDC-UW21121812094/2021	BA.1.15	S:L452R
hCoV-19/Israel/ICH-741108125/2021	BA.1.17	S:L452R
hCoV-19/Israel/ICH-741108666/2021	BA.1.1	S:L452R
hCoV-19/USA/AZ-ASU28977/2021	BA.1.9	M:I82T, S:L452R
hCoV-19/France/BFC-HMN-21122160683/2021	BA.1.15	M:I82T, N:R203M, S:L452R
hCoV-19/Israel/SMC-7539871/2021	BA.1.15	S:L452R
hCoV-19/USA/AZ-ASU29799/2021	BA.1.9	M:I82T, S:L452R
hCoV-19/USA/MS-MSPHL-0726/2021	BA.1.1.11	M:I82T, S:L452R
hCoV-19/Israel/ICH-741108559/2021	BA.1.9	S:L452R
hCoV-19/USA/WA-CDC-UW21121733447/2021	BA.1.15	S:L452R
hCoV-19/Sweden/190911772V/2021	BA.1.15	N:R203M, S:L452R
hCoV-19/Turkey/HSGM-F11486/2021	BA.1.16	N:R203M, S:L452R
hCoV-19/USA/WA-CDC-UW21121880637/2021	BA.1.15	S:L452R
hCoV-19/Turkey/HSGM-F12340/2021	BA.1.14	S:L452R
hCoV-19/USA/WA-CDC-UW21121870976/2021	BA.1.15	S:L452R
hCoV-19/USA/WA-CDC-UW21121806574/2021	BA.1.15	S:L452R
hCoV-19/India/GJ-INSACOG-GBRC3709/2021	BA.1.15	S:L452R
hCoV-19/USA/TX-BSWTemple-ILL-R31-0075/2021	BA.1.15	S:L452R
hCoV-19/Turkey/HSGM-F12295/2021	BA.1.14	S:L452R
hCoV-19/Turkey/HSGM-F12337/2021	BA.1.14	S:L452R
hCoV-19/Brazil/SP-IB_145055/2021	BA.1.14	S:L452R
hCoV-19/USA/WA-CDC-UW21121608413/2021	BA.1.15	S:L452R
hCoV-19/India/GJ-INSACOG-GBRC3438/2021	BA.1.14	S:L452R
hCoV-19/USA/NY-PRL-2021_1208_00N06/2021	BA.1	S:L452R
hCoV-19/USA/WA-CDC-UW21121829399/2021	BA.1.15	N:R203M, S:L452R
hCoV-19/Israel/ICH-741106893/2021	BA.1.1.1	M:I82T, S:L452R
hCoV-19/Turkey/HSGM-F11574/2021	BA.1.15	N:R203M, S:L452R
hCoV-19/USA/AZ-ASU26357/2021	BA.1.15	M:I82T, S:L452R
hCoV-19/USA/AZ-ASU29623/2021	BA.1.9	M:I82T, N:R203M, S:L452R
hCoV-19/USA/WA-CDC-UW21121768356/2021	BA.1.15	N:R203M, S:L452R
hCoV-19/Turkey/HSGM-F12333/2021	BA.1.14	S:L452R
hCoV-19/USA/WA-CDC-UW21121715523/2021	BA.1.15	N:R203M, S:L452R
hCoV-19/India/MH-INSACOG-GBRC3682/2021	BA.1.14	S:L452R
hCoV-19/USA/WA-CDC-UW21121661157/2021	BA.1.1.11	N:R203M, S:L452R
hCoV-19/Turkey/HSGM-F12322/2021	BA.1.14	S:L452R
hCoV-19/Mexico/CMX-INMEGEN-46-21/2021	BA.1.15	S:L452R
hCoV-19/USA/MA-NEIDL-02466/2021	BA.1.9	M:I82T, S:L452R
hCoV-19/USA/WA-CDC-UW21121814112/2021	BA.1.1.15	N:R203M, S:L452R
hCoV-19/India/GJ-INSACOG-GBRC3503/2021	BA.1.16	S:L452R
hCoV-19/Israel/ICH-741107982/2021	BA.1.1	S:L452R
hCoV-19/USA/WA-CDC-UW21121895977/2021	BA.1.15	N:R203M, S:L452R
hCoV-19/USA/WA-CDC-UW21121703473/2021	BA.1.15	N:R203M, S:L452R
hCoV-19/USA/WA-CDC-UW21121733007/2021	BA.1.1.11	S:L452R
hCoV-19/USA/WA-CDC-UW21121820737/2021	BA.1.15	S:L452R
hCoV-19/USA/CT-YPL21-136810/2021	BA.1.15	S:L452R
hCoV-19/USA/PA-VSP10158/2021	BA.1.15	M:I82T, S:L452R
hCoV-19/India/MH-RFIP06524/2021	BA.1.15	S:L452R
hCoV-19/Israel/ICH-741108149/2021	BA.1.15	M:I82T, S:L452R
hCoV-19/France/ARA-CFD700000268809/2021	BA.1.4	S:L452R
hCoV-19/USA/TX-BSWTemple-ILL-R31-0046/2021	BA.1.1	S:L452R
hCoV-19/India/GJ-INSACOG-GBRC3596/2021	BA.1.1	S:L452R
hCoV-19/USA/AZ-ASU29567/2021	BA.1.9	M:I82T, N:R203M, S:L452R
hCoV-19/USA/MA-NEIDL-02622/2021	BA.1.14	N:R203M, S:L452R
hCoV-19/USA/AZ-ASU29595/2021	BA.1.1.1	M:I82T, S:L452R
hCoV-19/USA/AZ-ASU29935/2021	BA.1.9	M:I82T, N:R203M, S:L452R
hCoV-19/Turkey/HSGM-F12289/2021	BA.1.14	S:L452R
hCoV-19/USA/WA-CDC-UW21121811112/2021	BA.1.15	S:L452R
hCoV-19/USA/NY-Wadsworth-21106828-01/2021	BA.1.15	M:I82T, S:L452R
hCoV-19/Turkey/HSGM-F10515/2021	BA.1.1.1	S:L452R
hCoV-19/India/GJ-INSACOG-GBRC3501/2021	BA.1.16	S:L452R
hCoV-19/Sweden/191063132V/2021	BA.1.14	S:L452R
hCoV-19/Sweden/191084182V/2021	BA.1.15	S:L452R
hCoV-19/USA/MN-UMGC-25505/2021	BA.1.9	S:L452R
hCoV-19/India/GJ-INSACOG-GBRC3236/2021	BA.1.1.15	S:L452R
hCoV-19/USA/NY-Wadsworth-21106308-01/2021	BA.1	M:I82T, S:L452R
hCoV-19/USA/WA-CDC-UW21121281795/2021	BA.1.4	S:L452R
hCoV-19/SouthAfrica/NCV258/2021	BA.1	S:L452R
hCoV-19/Spain/RI-CIBIR-218095712-Run27/2021	BA.1.17	S:L452R
hCoV-19/Spain/RI-CIBIR-218095890-Run27/2021	BA.1.17	S:L452R
hCoV-19/USA/OH-21AM-343CO00089/2021	BA.1.1.16	S:L452R
hCoV-19/Sweden/293005682V/2021	BA.1.17	S:L452R
hCoV-19/Brazil/SP-IB_145056/2021	BA.1.15	S:L452R
hCoV-19/Nigeria/NCDC-NR1507/2021	BA.1.1.15	S:L452R
hCoV-19/USA/AZ-ASU28034/2021	BA.1.14	S:L452R
hCoV-19/USA/OR-OHSU-213570570/2021	BA.1.1	S:L452R
hCoV-19/USA/WA-CDC-UW21121874399/2021	BA.1.1	S:L452R
hCoV-19/USA/WA-CDC-UW21121825032/2021	BA.1.1.15	S:L452R
hCoV-19/USA/WA-CDC-UW21121890255/2021	BA.1.1.15	S:L452R
hCoV-19/USA/AZ-ASU29510/2021	BA.1.9	S:L452R
hCoV-19/USA/AZ-ASU29542/2021	BA.1.14	S:L452R
hCoV-19/USA/CA-ASU29515/2021	BA.1.15	S:L452R
hCoV-19/USA/AZ-ASU29574/2021	BA.1.1	S:L452R
hCoV-19/USA/WA-CDC-UW21121819902/2021	BA.1.1.15	S:L452R
hCoV-19/USA/WA-CDC-UW21121836541/2021	BA.1.15	S:L452R
hCoV-19/USA/WA-CDC-UW21121708871/2021	BA.1.15	S:L452R
hCoV-19/USA/WA-CDC-UW21121800277/2021	BA.1.15	S:L452R
hCoV-19/USA/WA-CDC-UW21121635101/2021	BA.1.1.11	S:L452R
hCoV-19/USA/WA-CDC-UW21121887773/2021	BA.1.15	S:L452R
hCoV-19/USA/WA-CDC-UW21121726391/2021	BA.1.15	S:L452R
hCoV-19/USA/WA-CDC-UW21121826386/2021	BA.1.15	S:L452R
hCoV-19/USA/WA-CDC-UW21121783875/2021	BA.1.4	S:L452R
hCoV-19/USA/WA-CDC-UW21121807075/2021	BA.1.15	S:L452R
hCoV-19/USA/WA-CDC-UW21121802547/2021	BA.1.1	S:L452R
hCoV-19/Spain/PV-HUD-66790186/2021	BA.1.1	S:L452R
hCoV-19/Turkey/HSGM-F9902/2021	BA.1.15	S:L452R
hCoV-19/Turkey/HSGM-F9946/2021	BA.1.15	S:L452R
hCoV-19/Turkey/HSGM-F9937/2021	BA.1.15	S:L452R
hCoV-19/Turkey/HSGM-F9922/2021	BA.1.15	S:L452R
hCoV-19/Turkey/HSGM-F10003/2021	BA.1.15	S:L452R
hCoV-19/Turkey/HSGM-F9944/2021	BA.1.14	S:L452R
hCoV-19/USA/MA-NEIDL-02413/2021	BA.1.1	M:I82T, N:R203M, S:L452R
hCoV-19/Peru/LIM-INS-10747/2021	BA.1.17	S:L452R
hCoV-19/Spain/CT-HUVH-13885/2021	BA.1.1	S:L452R
hCoV-19/SouthAfrica/NICD-N22846/2021	BA.1	S:L452R
hCoV-19/Spain/GA-CHUVI-19457221/2021	BA.1.1.14	S:L452R
hCoV-19/Israel/ICH-741107383/2021	BA.1.16	S:L452R
hCoV-19/Israel/ICH-741107333/2021	BA.1.16	S:L452R
hCoV-19/SouthAfrica/NHLS-UCT-GP-N225/2021	BA.1.17	S:L452R
hCoV-19/SouthAfrica/NHLS-UCT-LA-Z761/2021	BA.1	S:L452R
hCoV-19/Nigeria/NCDC-NR1547/2021	BA.1.15	S:L452R
hCoV-19/Nigeria/NCDC-NR1566/2021	BA.1.1	S:L452R
hCoV-19/Nigeria/NCDC-NR1578/2021	BA.1.1.15	S:L452R
hCoV-19/USA/OH-21AM-350CO00687/2021	BA.1.1	S:L452R
hCoV-19/Brazil/MG-FUNED_311022210/2021	BA.1.1	S:L452R
hCoV-19/Italy/LAZ-AMC-2112131706-DS/2021	BA.1.14	S:L452R
hCoV-19/Sweden/2001510964/2021	BA.1.14	S:L452R
hCoV-19/USA/TX-BSWTemple-ILL-R31-0090/2021	BA.1.15	S:L452R
hCoV-19/USA/MD-IGS-52133504649A/2021	BA.1.14	S:L452R
hCoV-19/USA/MD-IGS-52133506206A/2021	BA.1.4	S:L452R
hCoV-19/Israel/ICH-741107921/2021	BA.1.1	S:L452R
hCoV-19/Israel/ICH-741107856/2021	BA.1.1	S:L452R
hCoV-19/Israel/ICH-741108001/2021	BA.1.4	S:L452R
hCoV-19/Israel/ICH-741107762/2021	BA.1.4	S:L452R
hCoV-19/Israel/ICH-741107977/2021	BA.1.15	S:L452R
hCoV-19/Israel/ICH-741107981/2021	BA.1.13	S:L452R
hCoV-19/Israel/ICH-741107764/2021	BA.1.1	S:L452R
hCoV-19/SouthAfrica/NHLS-UCT-GP-N221/2021	BA.1.17	S:L452R
hCoV-19/Israel/ICH-741108030/2021	BA.1.1	S:L452R
hCoV-19/Israel/ICH-741108005/2021	BA.1.15	S:L452R
hCoV-19/Israel/ICH-741107803/2021	BA.1.17	S:L452R
hCoV-19/Israel/ICH-741107960/2021	BA.1.1	S:L452R
hCoV-19/Israel/ICH-741107799/2021	BA.1.1	S:L452R
hCoV-19/Israel/ICH-741107966/2021	BA.1.15	S:L452R
hCoV-19/Israel/ICH-741108011/2021	BA.1.1	S:L452R
hCoV-19/Israel/ICH-741107860/2021	BA.1.4	S:L452R
hCoV-19/Israel/ICH-741107674/2021	BA.1.1	S:L452R
hCoV-19/Israel/ICH-741107789/2021	BA.1.4	S:L452R
hCoV-19/Israel/ICH-741108170/2021	BA.1.4	S:L452R
hCoV-19/Israel/ICH-741108213/2021	BA.1.13	S:L452R
hCoV-19/Israel/ICH-741108267/2021	BA.1.14	S:L452R
hCoV-19/Israel/ICH-741108543/2021	BA.1.15	S:L452R
hCoV-19/Israel/ICH-741108628/2021	BA.1.1	S:L452R
hCoV-19/Israel/ICH-741108586/2021	BA.1.17	S:L452R
hCoV-19/Israel/ICH-741108185/2021	BA.1.14	S:L452R
hCoV-19/Israel/ICH-741108195/2021	BA.1.4	S:L452R
hCoV-19/Israel/ICH-741108237/2021	BA.1.16	S:L452R
hCoV-19/Israel/ICH-741108600/2021	BA.1.1.11	S:L452R
hCoV-19/Israel/ICH-741108221/2021	BA.1.17	S:L452R
hCoV-19/Israel/ICH-741108619/2021	BA.1.1	S:L452R
hCoV-19/Israel/ICH-741108157/2021	BA.1.17	S:L452R
hCoV-19/Israel/ICH-741108609/2021	BA.1.1.15	S:L452R
hCoV-19/Israel/ICH-741108108/2021	BA.1.16	S:L452R
hCoV-19/Israel/ICH-741108206/2021	BA.1.14	S:L452R
hCoV-19/USA/AZ-ASU28736/2021	BA.1.9	S:L452R
hCoV-19/Belgium/MBLG-CTMAPF17363181/2021	BA.1.14	S:L452R
hCoV-19/Israel/ICH-741106717/2021	BA.1.15	S:L452R
hCoV-19/Israel/ICH-741106598/2021	BA.1.17	S:L452R
hCoV-19/Israel/ICH-741107295/2021	BA.1.17	S:L452R
hCoV-19/Israel/ICH-741106941/2021	BA.1.16	S:L452R
hCoV-19/Israel/ICH-741106939/2021	BA.1.16	S:L452R
hCoV-19/Spain/MD-HULP-014493063/2021	BA.1.17	S:L452R
hCoV-19/USA/MN-MDH-19348/2021	BA.1.1.1	S:L452R
hCoV-19/Turkey/HSGM-F9930/2021	BA.1.15	S:L452R
hCoV-19/USA/WA-CDC-UW21121097829/2021	BA.1.15	S:L452R
hCoV-19/USA/WA-CDC-UW21121403045/2021	BA.1.15	S:L452R
hCoV-19/USA/WA-CDC-UW21121455380/2021	BA.1.15	S:L452R
hCoV-19/Lithuania/MR-LUHS-31-06/2021	BA.1	S:L452R
hCoV-19/England/MILK-2E6026E/2021	BA.1.16	S:L452R
hCoV-19/Germany/BE-RKI-I-391964/2021	BA.1.13	S:L452R
hCoV-19/England/LSPA-2E42EAA/2021	BA.1.17	S:L452R
hCoV-19/England/PLYM-2DC3507/2021	BA.1.17	S:L452R
hCoV-19/England/LSPA-2E3DC6C/2021	BA.1.15	S:L452R
hCoV-19/England/MILK-2E35C64/2021	BA.1	S:L452R
hCoV-19/England/MILK-2E6EDD8/2021	BA.1.16	S:L452R
hCoV-19/England/MILK-2E81610/2021	BA.1.15	S:L452R
hCoV-19/England/MILK-2E7EEF0/2021	BA.1.9	S:L452R
hCoV-19/England/MILK-2E742FE/2021	BA.1.16	S:L452R
hCoV-19/England/MILK-2EF25C2/2021	BA.1.17	S:L452R
hCoV-19/USA/TX-HMH-MCoV-68787/2021	BA.1.15	S:L452R
hCoV-19/USA/TX-HMH-MCoV-68775/2021	BA.1.15	S:L452R
hCoV-19/USA/TX-HMH-MCoV-68834/2021	BA.1.15	S:L452R
hCoV-19/USA/TX-HMH-MCoV-68819/2021	BA.1.15	S:L452R
hCoV-19/England/NEWC-2ED5756/2021	BA.1.17	S:L452R
hCoV-19/USA/DC-CDC-LC0428332/2021	BA.1.15	S:L452R
hCoV-19/Sweden/200193682V/2021	BA.1.17	S:L452R
hCoV-19/Switzerland/VD-CHUV-GEN9204/2021	BA.1.1	S:L452R
hCoV-19/England/MILK-2ED1C79/2021	BA.1.17	S:L452R
hCoV-19/Spain/CT-HUGTiPM064VN6H3/2021	BA.1.17	M:I82T, S:L452R
hCoV-19/Scotland/QEUH-2E3F444/2021	BA.1.9	S:L452R
hCoV-19/England/MILK-2E27694/2021	BA.1	S:L452R
hCoV-19/England/MILK-2E37172/2021	BA.1.17	S:L452R
hCoV-19/Denmark/DCGC-252971/2021	BA.1.14	S:L452R
hCoV-19/USA/TX-HMH-MCoV-68482/2021	BA.1.15	S:L452R
hCoV-19/USA/TX-HMH-MCoV-68543/2021	BA.1.15	S:L452R
hCoV-19/USA/TX-HMH-MCoV-68550/2021	BA.1.15	S:L452R
hCoV-19/England/QEUH-2CB8445/2021	BA.1.17	S:L452R
hCoV-19/SouthAfrica/CERI-KRISP-K030838/2021	BA.1.9	S:L452R
hCoV-19/England/MILK-2EDB987/2021	BA.1.9	S:L452R
hCoV-19/USA/CA-CDC-LC0433976/2021	BA.1.15	S:L452R
hCoV-19/USA/TX-HMH-MCoV-68756/2021	BA.1.15	S:L452R
hCoV-19/USA/UT-UPHL-211230934631/2021	BA.1.1	S:L452R
hCoV-19/England/MILK-2F448C7/2021	BA.1.17	M:I82T, S:L452R
hCoV-19/England/BRBR-2E9329F/2021	BA.1.16	S:L452R
hCoV-19/England/MILK-2F69F03/2021	BA.1.16	S:L452R
hCoV-19/England/MILK-2E687C1/2021	BA.1.8	S:L452R
hCoV-19/England/BRBR-2F37E2F/2021	BA.1.15	S:L452R
hCoV-19/England/LSPA-2FC901D/2021	BA.1.16	S:L452R
hCoV-19/England/QEUH-2F466AD/2021	BA.1.17	S:L452R
hCoV-19/USA/WA-CDC-UW21121803740/2021	BA.1.1.15	S:L452R
hCoV-19/England/MILK-2F15C96/2021	BA.1.16	S:L452R
hCoV-19/England/MILK-2F1B97B/2021	BA.1.15	S:L452R
hCoV-19/England/MILK-2F1E204/2021	BA.1.16	S:L452R
hCoV-19/England/MILK-2F1BD51/2021	BA.1	S:L452R
hCoV-19/England/MILK-2F1D5EE/2021	BA.1.1.13	S:L452R
hCoV-19/England/MILK-2F1D681/2021	BA.1.15	S:L452R
hCoV-19/England/MILK-2F1D812/2021	BA.1.15	S:L452R
hCoV-19/England/MILK-2F1DC70/2021	BA.1.15	S:L452R
hCoV-19/England/MILK-2F1BDBB/2021	BA.1	S:L452R
hCoV-19/England/MILK-2F1DE7A/2021	BA.1.16	S:L452R
hCoV-19/England/MILK-2F1DB0A/2021	BA.1.15	S:L452R
hCoV-19/England/MILK-2F1D241/2021	BA.1.15	S:L452R
hCoV-19/England/MILK-2F1DE2F/2021	BA.1.17	S:L452R
hCoV-19/England/MILK-2F1DCAD/2021	BA.1.9	S:L452R
hCoV-19/England/MILK-2F1D5B1/2021	BA.1.15	S:L452R
hCoV-19/England/MILK-2F1DF95/2021	BA.1.16	S:L452R
hCoV-19/England/MILK-2F1DC8F/2021	BA.1.17	S:L452R
hCoV-19/England/MILK-2F1B911/2021	BA.1.17	S:L452R
hCoV-19/England/MILK-2F1D821/2021	BA.1.17	S:L452R
hCoV-19/England/MILK-2F1D830/2021	BA.1.16	S:L452R
hCoV-19/England/MILK-2F1DCE9/2021	BA.1.1	S:L452R
hCoV-19/England/MILK-2F1BE21/2021	BA.1.14	S:L452R
hCoV-19/England/ALDP-2F25E06/2021	BA.1.17	S:L452R
hCoV-19/England/LSPA-2F269E6/2021	BA.1.17	S:L452R
hCoV-19/Scotland/QEUH-2E53A2A/2021	BA.1.17	S:L452R
hCoV-19/England/MILK-2EF6FB1/2021	BA.1.1.15	S:L452R
hCoV-19/England/MILK-2F217A5/2021	BA.1.16	S:L452R
hCoV-19/Scotland/QEUH-2F22D0C/2021	BA.1.15	S:L452R
hCoV-19/England/ALDP-2FC3936/2021	BA.1.16	S:L452R
hCoV-19/England/LSPA-2FC7176/2021	BA.1.1	S:L452R
hCoV-19/England/ALDP-2EE4DAD/2021	BA.1.16	S:L452R
hCoV-19/England/LOND-129199B/2021	BA.1.16	S:L452R
hCoV-19/England/MILK-2F845F1/2021	BA.1.16	S:L452R
hCoV-19/England/MILK-2FB6C00/2021	BA.1.17	S:L452R
hCoV-19/England/MILK-2F8D18B/2021	BA.1.9	S:L452R
hCoV-19/England/MILK-2FB6EFB/2021	BA.1.9	S:L452R
hCoV-19/England/MILK-2FB6CD3/2021	BA.1.16	S:L452R
hCoV-19/England/ALDP-2F81A40/2021	BA.1.16	S:L452R
hCoV-19/England/ALDP-2F7AA2C/2021	BA.1.15	S:L452R
hCoV-19/England/MILK-2F94B56/2021	BA.1.17	S:L452R
hCoV-19/England/MILK-2EC50B8/2021	BA.1.14	S:L452R
hCoV-19/England/ALDP-2EC0572/2021	BA.1.15	S:L452R
hCoV-19/England/LSPA-2F76AA8/2021	BA.1.16	S:L452R
hCoV-19/England/MILK-2F7A1EB/2021	BA.1.16	S:L452R
hCoV-19/England/MILK-2F781DE/2021	BA.1.17	S:L452R
hCoV-19/England/MILK-2F75C58/2021	BA.1.17	S:L452R
hCoV-19/England/ALDP-2EE4E7D/2021	BA.1.1	S:L452R
hCoV-19/USA/TX-HMH-MCoV-69114/2021	BA.1.15	S:L452R
hCoV-19/Wales/PHWC-PG8MDB/2021	BA.1.17	S:L452R
hCoV-19/England/LSPA-2FC0C5E/2021	BA.1.15	S:L452R
hCoV-19/England/MILK-2E701F5/2021	BA.1.14	S:L452R
hCoV-19/England/HSLL-2ED7217/2021	BA.1.17	S:L452R
hCoV-19/England/QEUH-2E8304D/2021	BA.1.16	S:L452R
hCoV-19/England/MILK-2E80C88/2021	BA.1.16	S:L452R
hCoV-19/England/MILK-2E791DE/2021	BA.1.15	S:L452R
hCoV-19/England/MILK-2E7BDC9/2021	BA.1.16	S:L452R
hCoV-19/England/MILK-2E4A3A3/2021	BA.1.17	S:L452R
hCoV-19/England/MILK-2E58BAA/2021	BA.1.9	S:L452R
hCoV-19/Scotland/QEUH-2E69186/2021	BA.1.9	S:L452R
hCoV-19/USA/MD_NHCA_52520/2021	BA.1.15	S:L452R
hCoV-19/England/MILK-2ED4362/2021	BA.1	S:L452R
hCoV-19/Denmark/DCGC-271705/2021	BA.1.14	S:L452R
hCoV-19/England/MILK-2EC87B0/2021	BA.1.16	S:L452R
hCoV-19/England/BRBR-2ED2A9C/2021	BA.1.16	S:L452R
hCoV-19/England/BRBR-2ECDAC1/2021	BA.1.16	S:L452R
hCoV-19/England/BRBR-2EC5E63/2021	BA.1.17	S:L452R
hCoV-19/Wales/BRBR-2EC7C49/2021	BA.1.17	S:L452R
hCoV-19/England/BRBR-2EC7B79/2021	BA.1.16	S:L452R
hCoV-19/England/MILK-2ECF713/2021	BA.1.16	S:L452R
hCoV-19/England/MILK-2ED0955/2021	BA.1.15	S:L452R
hCoV-19/England/BRBR-2ECB586/2021	BA.1.1	S:L452R
hCoV-19/England/MILK-2EC8A6C/2021	BA.1.15	S:L452R
hCoV-19/England/MILK-2EA41CB/2021	BA.1.16	S:L452R
hCoV-19/Scotland/QEUH-2EA05E1/2021	BA.1	S:L452R
hCoV-19/Scotland/QEUH-2EA0350/2021	BA.1	S:L452R
hCoV-19/England/BRBR-2EA6114/2021	BA.1.16	S:L452R
hCoV-19/England/ALDP-2E8E21F/2021	BA.1.17	S:L452R
hCoV-19/England/MILK-2EE6EA8/2021	BA.1.16	S:L452R
hCoV-19/USA/OR-OHSU-213570974/2021	BA.1.1	S:L452R
hCoV-19/England/MILK-2EBD8BB/2021	BA.1.15	S:L452R
hCoV-19/Scotland/QEUH-2EB7BF4/2021	BA.1.17	S:L452R
hCoV-19/England/MILK-2EA2725/2021	BA.1.15	S:L452R
hCoV-19/England/MILK-2EA7966/2021	BA.1.16	S:L452R
hCoV-19/England/QEUH-2EA20DF/2021	BA.1.16	S:L452R
hCoV-19/England/PLYM-2ED8AE1/2021	BA.1.1.1	S:L452R
hCoV-19/England/ALDP-2EAC2EE/2021	BA.1.17	S:L452R
hCoV-19/England/MILK-2E85AA7/2021	BA.1.15	S:L452R
hCoV-19/England/BRBR-2EB28F2/2021	BA.1.15	S:L452R
hCoV-19/England/MILK-2EAA06E/2021	BA.1.16	S:L452R
hCoV-19/England/ALDP-2EAEBB4/2021	BA.1.15	S:L452R
hCoV-19/England/MILK-2EA719B/2021	BA.1.1	M:I82T, S:L452R
hCoV-19/England/ALDP-2EB3DE3/2021	BA.1.17	S:L452R
hCoV-19/England/MILK-2E9F178/2021	BA.1.17	S:L452R
hCoV-19/England/MILK-2E66295/2021	BA.1.16	S:L452R
hCoV-19/England/MILK-2E4C286/2021	BA.1.14	S:L452R
hCoV-19/England/MILK-2E6A9BA/2021	BA.1.17	S:L452R
hCoV-19/USA/TX-HMH-MCoV-68847/2021	BA.1.15	S:L452R
hCoV-19/USA/TX-HMH-MCoV-68850/2021	BA.1.15	S:L452R
hCoV-19/USA/TX-HMH-MCoV-68853/2021	BA.1.15	S:L452R
hCoV-19/USA/TX-HMH-MCoV-68854/2021	BA.1.15	S:L452R
hCoV-19/USA/TX-HMH-MCoV-68856/2021	BA.1.15	M:I82T, S:L452R
hCoV-19/USA/TX-HMH-MCoV-68865/2021	BA.1.15	S:L452R
hCoV-19/USA/TX-HMH-MCoV-68866/2021	BA.1.15	S:L452R
hCoV-19/USA/TX-HMH-MCoV-68867/2021	BA.1.15	S:L452R
hCoV-19/USA/TX-HMH-MCoV-68871/2021	BA.1.15	M:I82T, S:L452R
hCoV-19/USA/TX-HMH-MCoV-68877/2021	BA.1.15	S:L452R
hCoV-19/USA/TX-HMH-MCoV-68882/2021	BA.1.15	S:L452R
hCoV-19/USA/TX-HMH-MCoV-68892/2021	BA.1.15	M:I82T, S:L452R
hCoV-19/USA/TX-HMH-MCoV-68893/2021	BA.1.15	S:L452R
hCoV-19/USA/TX-HMH-MCoV-68903/2021	BA.1.15	S:L452R
hCoV-19/USA/TX-HMH-MCoV-68915/2021	BA.1.15	S:L452R
hCoV-19/USA/TX-HMH-MCoV-68918/2021	BA.1.15	S:L452R
hCoV-19/USA/TX-HMH-MCoV-68931/2021	BA.1.15	S:L452R
hCoV-19/USA/TX-HMH-MCoV-68933/2021	BA.1.15	S:L452R
hCoV-19/USA/TX-HMH-MCoV-68934/2021	BA.1.15	S:L452R
hCoV-19/USA/TX-HMH-MCoV-68935/2021	BA.1.15	S:L452R
hCoV-19/USA/TX-HMH-MCoV-68942/2021	BA.1.15	S:L452R
hCoV-19/USA/TX-HMH-MCoV-68943/2021	BA.1.15	S:L452R
hCoV-19/USA/TX-HMH-MCoV-68945/2021	BA.1.15	S:L452R
hCoV-19/USA/TX-HMH-MCoV-68946/2021	BA.1.15	S:L452R
hCoV-19/USA/TX-HMH-MCoV-68947/2021	BA.1.15	S:L452R
hCoV-19/USA/TX-HMH-MCoV-68957/2021	BA.1.15	S:L452R
hCoV-19/USA/TX-HMH-MCoV-68958/2021	BA.1.15	S:L452R
hCoV-19/USA/TX-HMH-MCoV-68961/2021	BA.1.15	S:L452R
hCoV-19/USA/TX-HMH-MCoV-68963/2021	BA.1.15	S:L452R
hCoV-19/USA/TX-HMH-MCoV-68964/2021	BA.1.15	S:L452R
hCoV-19/USA/TX-HMH-MCoV-68965/2021	BA.1.15	S:L452R
hCoV-19/USA/TX-HMH-MCoV-68966/2021	BA.1.15	S:L452R
hCoV-19/USA/TX-HMH-MCoV-68967/2021	BA.1.15	S:L452R
hCoV-19/USA/TX-HMH-MCoV-68975/2021	BA.1.15	S:L452R
hCoV-19/USA/TX-HMH-MCoV-68976/2021	BA.1.15	S:L452R
hCoV-19/USA/TX-HMH-MCoV-68979/2021	BA.1.15	S:L452R
hCoV-19/USA/TX-HMH-MCoV-68980/2021	BA.1.15	S:L452R
hCoV-19/USA/TX-HMH-MCoV-68982/2021	BA.1.1.14	S:L452R
hCoV-19/USA/TX-HMH-MCoV-68983/2021	BA.1.1	S:L452R
hCoV-19/USA/TX-HMH-MCoV-68985/2021	BA.1.15	S:L452R
hCoV-19/USA/TX-HMH-MCoV-68988/2021	BA.1.15	S:L452R
hCoV-19/USA/TX-HMH-MCoV-68991/2021	BA.1.15	S:L452R
hCoV-19/USA/TX-HMH-MCoV-68993/2021	BA.1.15	S:L452R
hCoV-19/USA/TX-HMH-MCoV-68996/2021	BA.1.15	S:L452R
hCoV-19/USA/TX-HMH-MCoV-68997/2021	BA.1.15	S:L452R
hCoV-19/USA/TX-HMH-MCoV-69003/2021	BA.1.15	S:L452R
hCoV-19/USA/TX-HMH-MCoV-69005/2021	BA.1.15	M:I82T, S:L452R
hCoV-19/USA/TX-HMH-MCoV-69007/2021	BA.1.15	S:L452R
hCoV-19/USA/TX-HMH-MCoV-69025/2021	BA.1.15	S:L452R
hCoV-19/USA/TX-HMH-MCoV-69026/2021	BA.1.15	M:I82T, S:L452R
hCoV-19/USA/TX-HMH-MCoV-69030/2021	BA.1.15	S:L452R
hCoV-19/USA/TX-HMH-MCoV-69031/2021	BA.1.15	S:L452R
hCoV-19/USA/TX-HMH-MCoV-69032/2021	BA.1.15	S:L452R
hCoV-19/USA/TX-HMH-MCoV-69033/2021	BA.1.15	S:L452R
hCoV-19/USA/TX-HMH-MCoV-69038/2021	BA.1.15	S:L452R
hCoV-19/USA/TX-HMH-MCoV-69039/2021	BA.1.15	M:I82T, S:L452R
hCoV-19/USA/TX-HMH-MCoV-69042/2021	BA.1.15	S:L452R
hCoV-19/USA/TX-HMH-MCoV-69048/2021	BA.1.15	M:I82T, S:L452R
hCoV-19/USA/TX-HMH-MCoV-69051/2021	BA.1.15	S:L452R
hCoV-19/USA/TX-HMH-MCoV-69052/2021	BA.1.15	S:L452R
hCoV-19/USA/TX-HMH-MCoV-69053/2021	BA.1.15	S:L452R
hCoV-19/USA/TX-HMH-MCoV-69054/2021	BA.1.15	S:L452R
hCoV-19/USA/TX-HMH-MCoV-69059/2021	BA.1.15	S:L452R
hCoV-19/USA/TX-HMH-MCoV-69060/2021	BA.1.15	S:L452R
hCoV-19/USA/TX-HMH-MCoV-69061/2021	BA.1.15	M:I82T, S:L452R
hCoV-19/USA/TX-HMH-MCoV-69062/2021	BA.1.15	S:L452R
hCoV-19/USA/TX-HMH-MCoV-69063/2021	BA.1.15	S:L452R
hCoV-19/USA/TX-HMH-MCoV-69064/2021	BA.1.15	M:I82T, S:L452R
hCoV-19/USA/TX-HMH-MCoV-69065/2021	BA.1.15	S:L452R
hCoV-19/USA/TX-HMH-MCoV-69067/2021	BA.1.15	S:L452R
hCoV-19/USA/TX-HMH-MCoV-69070/2021	BA.1.15	S:L452R
hCoV-19/USA/TX-HMH-MCoV-69071/2021	BA.1.15	S:L452R
hCoV-19/USA/TX-HMH-MCoV-69073/2021	BA.1.15	S:L452R
hCoV-19/USA/TX-HMH-MCoV-69074/2021	BA.1.15	S:L452R
hCoV-19/USA/TX-HMH-MCoV-69075/2021	BA.1.15	S:L452R
hCoV-19/USA/TX-HMH-MCoV-69076/2021	BA.1.15	S:L452R
hCoV-19/USA/TX-HMH-MCoV-69077/2021	BA.1.1	S:L452R
hCoV-19/USA/TX-HMH-MCoV-69078/2021	BA.1.15	S:L452R
hCoV-19/USA/TX-HMH-MCoV-69079/2021	BA.1.15	S:L452R
hCoV-19/USA/TX-HMH-MCoV-69080/2021	BA.1.15	S:L452R
hCoV-19/USA/TX-HMH-MCoV-69081/2021	BA.1.15	S:L452R
hCoV-19/USA/TX-HMH-MCoV-69083/2021	BA.1.15	S:L452R
hCoV-19/USA/TX-HMH-MCoV-69084/2021	BA.1.15	S:L452R
hCoV-19/USA/TX-HMH-MCoV-69087/2021	BA.1.15	S:L452R
hCoV-19/USA/TX-HMH-MCoV-69089/2021	BA.1.15	M:I82T, S:L452R
hCoV-19/USA/TX-HMH-MCoV-69091/2021	BA.1.1.14	S:L452R
hCoV-19/USA/TX-HMH-MCoV-69101/2021	BA.1.15	S:L452R
hCoV-19/USA/TX-HMH-MCoV-69103/2021	BA.1.15	S:L452R
hCoV-19/USA/TX-HMH-MCoV-69108/2021	BA.1.15	M:I82T, S:L452R
hCoV-19/USA/TX-HMH-MCoV-69110/2021	BA.1.15	S:L452R
hCoV-19/USA/TX-HMH-MCoV-69130/2021	BA.1.15	S:L452R
hCoV-19/USA/TX-HMH-MCoV-69171/2021	BA.1.15	S:L452R
hCoV-19/USA/TX-HMH-MCoV-69212/2021	BA.1.15	S:L452R
hCoV-19/USA/TX-HMH-MCoV-69301/2021	BA.1.15	M:I82T, S:L452R
hCoV-19/USA/TX-HMH-MCoV-69402/2021	BA.1.15	M:I82T, S:L452R
hCoV-19/USA/TX-HMH-MCoV-69462/2021	BA.1.15	S:L452R
hCoV-19/Indonesia/BT-NIHRD-WGS14271/2021	BA.1.1	S:L452R
hCoV-19/England/PHEP-YYNAFUB/2021	BA.1.17	S:L452R
hCoV-19/Wales/MILK-2E6620E/2021	BA.1.15	S:L452R
hCoV-19/England/BRBR-2EADA5E/2021	BA.1.17	S:L452R
hCoV-19/England/BRBR-2E86E22/2021	BA.1.16	S:L452R
hCoV-19/England/BRBR-2E934F3/2021	BA.1.17	S:L452R
hCoV-19/England/BRBR-2E93192/2021	BA.1.16	S:L452R
hCoV-19/USA/GA-CDC-ASC210625798/2021	BA.1.1	S:L452R
hCoV-19/USA/IL-CDC-ASC210625427/2021	BA.1.15	S:L452R
hCoV-19/USA/IL-CDC-ASC210625426/2021	BA.1.15	S:L452R
hCoV-19/SouthAfrica/CERI-KRISP-K032315/2021	BA.1.13	S:L452R
hCoV-19/SouthAfrica/CERI-KRISP-K032327/2021	BA.1.9	S:L452R
hCoV-19/England/MILK-2FA6B24/2021	BA.1.15	S:L452R
hCoV-19/Scotland/QEUH-2F9FD0A/2021	BA.1	S:L452R
hCoV-19/England/MILK-2F5C55C/2021	BA.1.16	S:L452R
hCoV-19/England/LSPA-2F62F55/2021	BA.1.16	S:L452R
hCoV-19/England/NEWC-2F4A8EF/2021	BA.1.17	S:L452R
hCoV-19/England/MILK-2F61CD7/2021	BA.1.15	S:L452R
hCoV-19/Denmark/DCGC-290338/2021	BA.1.15	S:L452R
hCoV-19/England/BRBR-2F414C6/2021	BA.1.17	S:L452R
hCoV-19/USA/WA-CDC-UW21121720743/2021	BA.1.1.1	S:L452R
hCoV-19/USA/IL-CDC-IBX071182437271/2021	BA.1.14	S:L452R
hCoV-19/England/MILK-2F4D442/2021	BA.1.17	S:L452R
hCoV-19/England/MILK-2F4D6D3/2021	BA.1.17	S:L452R
hCoV-19/England/ALDP-2F4B3CF/2021	BA.1.17	S:L452R
hCoV-19/England/PHEC-3W046W07/2021	BA.1.17	S:L452R
hCoV-19/USA/TX-HMH-MCoV-69539/2021	BA.1.15	S:L452R
hCoV-19/USA/TX-HMH-MCoV-69537/2021	BA.1.15	S:L452R
hCoV-19/USA/TX-HMH-MCoV-69494/2021	BA.1.15	S:L452R
hCoV-19/USA/TX-HMH-MCoV-69553/2021	BA.1.15	S:L452R
hCoV-19/USA/TX-HMH-MCoV-69559/2021	BA.1.15	S:L452R
hCoV-19/USA/TX-HMH-MCoV-69475/2021	BA.1.15	S:L452R
hCoV-19/USA/TX-HMH-MCoV-69266/2021	BA.1.15	M:I82T, S:L452R
hCoV-19/Brazil/MG-FUNED-210815002477/2021	BA.1	S:L452R
hCoV-19/USA/TX-HMH-MCoV-69155/2021	BA.1.15	S:L452R
hCoV-19/USA/TX-HMH-MCoV-69264/2021	BA.1.15	S:L452R
hCoV-19/Brazil/MG-FUNED210815002478/2021	BA.1	S:L452R
hCoV-19/USA/TX-HMH-MCoV-69186/2021	BA.1.15	S:L452R
hCoV-19/USA/TX-HMH-MCoV-69137/2021	BA.1.15	S:L452R
hCoV-19/USA/TX-HMH-MCoV-69123/2021	BA.1.15	S:L452R
hCoV-19/USA/TX-HMH-MCoV-69133/2021	BA.1.15	S:L452R
hCoV-19/USA/TX-HMH-MCoV-69131/2021	BA.1.15	S:L452R
hCoV-19/USA/TX-HMH-MCoV-69125/2021	BA.1.15	S:L452R
hCoV-19/USA/TX-HMH-MCoV-69273/2021	BA.1.15	S:L452R
hCoV-19/USA/TX-HMH-MCoV-69145/2021	BA.1.15	S:L452R
hCoV-19/USA/TX-HMH-MCoV-69190/2021	BA.1.15	S:L452R
hCoV-19/USA/TX-HMH-MCoV-69122/2021	BA.1.15	S:L452R
hCoV-19/USA/TX-HMH-MCoV-69150/2021	BA.1.15	S:L452R
hCoV-19/USA/TX-HMH-MCoV-69138/2021	BA.1.15	S:L452R
hCoV-19/USA/TX-HMH-MCoV-69152/2021	BA.1.15	S:L452R
hCoV-19/USA/TX-HMH-MCoV-69128/2021	BA.1.15	S:L452R
hCoV-19/USA/TX-HMH-MCoV-69136/2021	BA.1.15	S:L452R
hCoV-19/USA/TX-HMH-MCoV-69132/2021	BA.1.15	S:L452R
hCoV-19/USA/TX-HMH-MCoV-69141/2021	BA.1.16	S:L452R
hCoV-19/USA/TX-HMH-MCoV-69120/2021	BA.1.15	S:L452R
hCoV-19/USA/TX-HMH-MCoV-69144/2021	BA.1.15	S:L452R
hCoV-19/USA/TX-HMH-MCoV-69247/2021	BA.1.1	S:L452R
hCoV-19/USA/TX-HMH-MCoV-69251/2021	BA.1.15	S:L452R
hCoV-19/USA/TX-HMH-MCoV-69174/2021	BA.1.15	S:L452R
hCoV-19/USA/TX-HMH-MCoV-69252/2021	BA.1.15	S:L452R
hCoV-19/USA/TX-HMH-MCoV-69169/2021	BA.1.15	S:L452R
hCoV-19/USA/TX-HMH-MCoV-69250/2021	BA.1.15	S:L452R
hCoV-19/USA/TX-HMH-MCoV-69176/2021	BA.1.15	S:L452R
hCoV-19/USA/TX-HMH-MCoV-69262/2021	BA.1.15	S:L452R
hCoV-19/USA/TX-HMH-MCoV-69267/2021	BA.1.15	S:L452R
hCoV-19/USA/TX-HMH-MCoV-69177/2021	BA.1.15	S:L452R
hCoV-19/USA/TX-HMH-MCoV-69178/2021	BA.1.15	S:L452R
hCoV-19/USA/TX-HMH-MCoV-69185/2021	BA.1.15	S:L452R
hCoV-19/USA/TX-HMH-MCoV-69234/2021	BA.1.15	S:L452R
hCoV-19/USA/TX-HMH-MCoV-69239/2021	BA.1.1	S:L452R
hCoV-19/USA/TX-HMH-MCoV-69161/2021	BA.1.15	S:L452R
hCoV-19/USA/TX-HMH-MCoV-69165/2021	BA.1.15	S:L452R
hCoV-19/USA/TX-HMH-MCoV-69242/2021	BA.1.15	S:L452R
hCoV-19/USA/TX-HMH-MCoV-69243/2021	BA.1.15	S:L452R
hCoV-19/USA/TX-HMH-MCoV-69163/2021	BA.1.15	S:L452R
hCoV-19/USA/TX-HMH-MCoV-69164/2021	BA.1.15	S:L452R
hCoV-19/USA/TX-HMH-MCoV-69215/2021	BA.1.15	S:L452R
hCoV-19/USA/TX-HMH-MCoV-69222/2021	BA.1.15	S:L452R
hCoV-19/USA/TX-HMH-MCoV-69224/2021	BA.1.15	S:L452R
hCoV-19/USA/TX-HMH-MCoV-69291/2021	BA.1.15	S:L452R
hCoV-19/USA/TX-HMH-MCoV-69285/2021	BA.1.15	S:L452R
hCoV-19/USA/TX-HMH-MCoV-69295/2021	BA.1.15	S:L452R
hCoV-19/USA/TX-HMH-MCoV-69284/2021	BA.1.15	S:L452R
hCoV-19/USA/TX-HMH-MCoV-69283/2021	BA.1.15	S:L452R
hCoV-19/USA/TX-HMH-MCoV-69203/2021	BA.1.15	S:L452R
hCoV-19/USA/TX-HMH-MCoV-69204/2021	BA.1.15	S:L452R
hCoV-19/USA/TX-HMH-MCoV-69195/2021	BA.1.15	S:L452R
hCoV-19/USA/TX-HMH-MCoV-69278/2021	BA.1.15	S:L452R
hCoV-19/USA/TX-HMH-MCoV-69279/2021	BA.1.15	S:L452R
hCoV-19/USA/TX-HMH-MCoV-69228/2021	BA.1.15	S:L452R
hCoV-19/USA/TX-HMH-MCoV-69231/2021	BA.1.15	S:L452R
hCoV-19/USA/TX-HMH-MCoV-69225/2021	BA.1.15	S:L452R
hCoV-19/USA/TX-HMH-MCoV-69227/2021	BA.1.15	S:L452R
hCoV-19/USA/TX-HMH-MCoV-69327/2021	BA.1.15	S:L452R
hCoV-19/USA/TX-HMH-MCoV-69329/2021	BA.1.15	S:L452R
hCoV-19/USA/TX-HMH-MCoV-69339/2021	BA.1.15	S:L452R
hCoV-19/USA/TX-HMH-MCoV-69202/2021	BA.1.15	S:L452R
hCoV-19/USA/TX-HMH-MCoV-69198/2021	BA.1.15	S:L452R
hCoV-19/USA/TX-HMH-MCoV-69342/2021	BA.1.15	S:L452R
hCoV-19/USA/TX-HMH-MCoV-69320/2021	BA.1.15	S:L452R
hCoV-19/USA/TX-HMH-MCoV-69345/2021	BA.1.15	S:L452R
hCoV-19/USA/TX-HMH-MCoV-69363/2021	BA.1.15	S:L452R
hCoV-19/USA/TX-HMH-MCoV-69310/2021	BA.1.15	S:L452R
hCoV-19/USA/TX-HMH-MCoV-69315/2021	BA.1.15	S:L452R
hCoV-19/USA/TX-HMH-MCoV-69340/2021	BA.1.15	S:L452R
hCoV-19/USA/TX-HMH-MCoV-69303/2021	BA.1.15	S:L452R
hCoV-19/USA/TX-HMH-MCoV-69302/2021	BA.1.15	S:L452R
hCoV-19/USA/TX-HMH-MCoV-69341/2021	BA.1.15	S:L452R
hCoV-19/USA/TX-HMH-MCoV-69344/2021	BA.1.15	S:L452R
hCoV-19/USA/TX-HMH-MCoV-69357/2021	BA.1.15	S:L452R
hCoV-19/USA/TX-HMH-MCoV-69354/2021	BA.1.1	S:L452R
hCoV-19/USA/TX-HMH-MCoV-69348/2021	BA.1.15	S:L452R
hCoV-19/USA/TX-HMH-MCoV-69311/2021	BA.1.15	S:L452R
hCoV-19/USA/TX-HMH-MCoV-69333/2021	BA.1.1	S:L452R
hCoV-19/USA/TX-HMH-MCoV-69330/2021	BA.1.15	S:L452R
hCoV-19/USA/TX-HMH-MCoV-69318/2021	BA.1.15	S:L452R
hCoV-19/USA/TX-HMH-MCoV-69331/2021	BA.1.13	S:L452R
hCoV-19/USA/TX-HMH-MCoV-69336/2021	BA.1.15	S:L452R
hCoV-19/USA/TX-HMH-MCoV-69321/2021	BA.1.15	S:L452R
hCoV-19/USA/TX-HMH-MCoV-69380/2021	BA.1.15	S:L452R
hCoV-19/USA/TX-HMH-MCoV-69442/2021	BA.1.15	S:L452R
hCoV-19/USA/TX-HMH-MCoV-69407/2021	BA.1.15	S:L452R
hCoV-19/USA/TX-HMH-MCoV-69416/2021	BA.1.15	S:L452R
hCoV-19/USA/TX-HMH-MCoV-69396/2021	BA.1.15	S:L452R
hCoV-19/USA/TX-HMH-MCoV-69397/2021	BA.1.15	S:L452R
hCoV-19/USA/TX-HMH-MCoV-69388/2021	BA.1.15	S:L452R
hCoV-19/USA/TX-HMH-MCoV-69463/2021	BA.1.15	S:L452R
hCoV-19/USA/TX-HMH-MCoV-69448/2021	BA.1.1	S:L452R
hCoV-19/USA/TX-HMH-MCoV-69405/2021	BA.1.15	S:L452R
hCoV-19/USA/TX-HMH-MCoV-69406/2021	BA.1.15	S:L452R
hCoV-19/USA/TX-HMH-MCoV-69434/2021	BA.1.15	S:L452R
hCoV-19/Germany/NW-RKI-I-393894/2021	BA.1.15	S:L452R
hCoV-19/Germany/BY-RKI-I-397111/2021	BA.1.15	S:L452R
hCoV-19/Germany/HE-RKI-I-397827/2021	BA.1.14	S:L452R
hCoV-19/Germany/NW-RKI-I-409457/2021	BA.1.12	S:L452R
hCoV-19/Germany/BY-RKI-I-409499/2021	BA.1.1.15	S:L452R
hCoV-19/England/HSLL-2E999FE/2021	BA.1.17	S:L452R
hCoV-19/USA/TX-CDC-ASC210628217/2021	BA.1.15	S:L452R
hCoV-19/England/MILK-2F1C85F/2021	BA.1.17	S:L452R
hCoV-19/England/QEUH-2F1CEB7/2021	BA.1.9	S:L452R
hCoV-19/England/MILK-2F14DA3/2021	BA.1.17	S:L452R
hCoV-19/England/ALDP-2EE015A/2021	BA.1.17	S:L452R
hCoV-19/USA/TX-HMH-MCoV-69102/2021	BA.1.15	S:L452R
hCoV-19/USA/TX-HMH-MCoV-69096/2021	BA.1.1	S:L452R
hCoV-19/USA/TX-HMH-MCoV-69151/2021	BA.1.15	S:L452R
hCoV-19/USA/TX-HMH-MCoV-69112/2021	BA.1.15	S:L452R
hCoV-19/USA/TX-HMH-MCoV-69107/2021	BA.1.15	S:L452R
hCoV-19/USA/TX-HMH-MCoV-69099/2021	BA.1.15	S:L452R
hCoV-19/USA/TX-HMH-MCoV-69158/2021	BA.1.15	S:L452R
hCoV-19/USA/TX-HMH-MCoV-69116/2021	BA.1.15	S:L452R
hCoV-19/USA/TX-HMH-MCoV-69127/2021	BA.1.15	S:L452R
hCoV-19/USA/TX-HMH-MCoV-69092/2021	BA.1.15	S:L452R
hCoV-19/USA/TX-HMH-MCoV-69162/2021	BA.1.15	S:L452R
hCoV-19/USA/TX-HMH-MCoV-69111/2021	BA.1.15	S:L452R
hCoV-19/USA/TX-HMH-MCoV-69100/2021	BA.1.15	S:L452R
hCoV-19/England/MILK-2EF6564/2021	BA.1.1.14	S:L452R
hCoV-19/England/MILK-2EF5626/2021	BA.1.9	S:L452R
hCoV-19/England/ALDP-2EFDAB9/2021	BA.1.16	S:L452R
hCoV-19/USA/TX-HMH-MCoV-69223/2021	BA.1.15	S:L452R
hCoV-19/USA/TX-HMH-MCoV-69519/2021	BA.1.15	S:L452R
hCoV-19/USA/TX-HMH-MCoV-69352/2021	BA.1.15	S:L452R
hCoV-19/USA/TX-HMH-MCoV-69412/2021	BA.1.15	S:L452R
hCoV-19/USA/TX-HMH-MCoV-69375/2021	BA.1.15	S:L452R
hCoV-19/USA/TX-HMH-MCoV-69270/2021	BA.1.15	S:L452R
hCoV-19/USA/TX-HMH-MCoV-69260/2021	BA.1.15	S:L452R
hCoV-19/USA/TX-HMH-MCoV-69241/2021	BA.1.15	S:L452R
hCoV-19/USA/TX-HMH-MCoV-69452/2021	BA.1.15	S:L452R
hCoV-19/USA/TX-HMH-MCoV-69201/2021	BA.1.15	S:L452R
hCoV-19/USA/TX-HMH-MCoV-69183/2021	BA.1.15	S:L452R
hCoV-19/USA/TX-HMH-MCoV-69173/2021	BA.1.15	S:L452R
hCoV-19/USA/TX-HMH-MCoV-69207/2021	BA.1.15	S:L452R
hCoV-19/USA/TX-HMH-MCoV-69389/2021	BA.1.15	S:L452R
hCoV-19/England/MILK-2EE63B8/2021	BA.1.17	S:L452R
hCoV-19/England/MILK-2EFB5D8/2021	BA.1.15	S:L452R
hCoV-19/England/LSPA-2F0523D/2021	BA.1.17	S:L452R
hCoV-19/England/MILK-2F11CB8/2021	BA.1.9	S:L452R
hCoV-19/England/ALDP-2EE74C3/2021	BA.1.15	S:L452R
hCoV-19/England/QEUH-2DDAEF3/2021	BA.1	S:L452R
hCoV-19/England/MILK-2ED08FE/2021	BA.1.14	S:L452R
hCoV-19/USA/NJ-CDC-IBX470856054673/2021	BA.1.1	S:L452R
hCoV-19/SouthAfrica/NHLS-UCT-GS-AF19/2021	BA.1.14	S:L452R
hCoV-19/England/BRBR-2EA8ABD/2021	BA.1.17	S:L452R
hCoV-19/USA/IL-CDC-ASC210629119/2021	BA.1.1	S:L452R
hCoV-19/England/BRBR-2E8D1D7/2021	BA.1.1.15	S:L452R
hCoV-19/England/ALDP-2EFDAAA/2021	BA.1.17	S:L452R
hCoV-19/Belgium/MBLG-CTMAPF27736653/2021	BA.1.1.1	S:L452R
hCoV-19/USA/GA-CDC-ASC210628840/2021	BA.1.1.1	S:L452R
hCoV-19/England/MILK-2F8ECA7/2021	BA.1.15	S:L452R
hCoV-19/Israel/ICH-741109211/2021	BA.1.17	S:L452R
hCoV-19/England/MILK-2F81275/2021	BA.1.16	S:L452R
hCoV-19/Italy/LOM-Policlinico-Milano-18982095/2021	BA.1.17	S:L452R
hCoV-19/England/MILK-2F7E2F3/2021	BA.1.17	S:L452R
hCoV-19/England/MILK-2F6D89B/2021	BA.1.16	S:L452R
hCoV-19/England/MILK-2F702C4/2021	BA.1.9	M:I82T, S:L452R
hCoV-19/England/MILK-2F7120F/2021	BA.1.17	S:L452R
hCoV-19/England/MILK-2F70394/2021	BA.1.17	S:L452R
hCoV-19/USA/TX-BSWTemple-ILL-R31-0020/2021	BA.1.15	S:L452R
hCoV-19/England/MILK-2F744BB/2021	BA.1.15	S:L452R
hCoV-19/France/BFC-CERBAHC-12872634/2021	BA.1.14	S:L452R
hCoV-19/USA/TX-HMH-MCoV-68941/2021	BA.1.15	S:L452R
hCoV-19/Israel/ICH-741108247/2021	BA.1.1	S:L452R
hCoV-19/USA/TX-HMH-MCoV-68929/2021	BA.1.15	S:L452R
hCoV-19/USA/TX-HMH-MCoV-68932/2021	BA.1.15	S:L452R
hCoV-19/USA/TX-HMH-MCoV-68973/2021	BA.1.15	S:L452R
hCoV-19/USA/TX-HMH-MCoV-68969/2021	BA.1.15	S:L452R
hCoV-19/USA/TX-HMH-MCoV-68978/2021	BA.1.15	S:L452R
hCoV-19/Scotland/QEUH-2E9B68C/2021	BA.1.9	S:L452R
hCoV-19/USA/TX-HMH-MCoV-68992/2021	BA.1.15	S:L452R
hCoV-19/USA/TX-HMH-MCoV-68995/2021	BA.1.15	S:L452R
hCoV-19/USA/TX-HMH-MCoV-68990/2021	BA.1.15	S:L452R
hCoV-19/USA/TX-HMH-MCoV-68984/2021	BA.1.15	S:L452R
hCoV-19/Russia/SPE-RII-6345S/2021	BA.1.1	S:L452R
hCoV-19/Russia/SPE-RII-6351S/2021	BA.1.1	S:L452R
hCoV-19/Russia/SPE-RII-6347S/2021	BA.1.1	S:L452R
hCoV-19/England/LSPA-2EBF93E/2021	BA.1.15	S:L452R
hCoV-19/Italy/CAM_IZSM_RD20703057270_IZSM_COLLI_TIGEM/2021	BA.1.1.1	S:L452R
hCoV-19/England/NORT-YBYO1K/2021	BA.1.16	S:L452R
hCoV-19/Italy/EMR-IZSLER-2021-446731-004-01/2021	BA.1.14	S:L452R
hCoV-19/Italy/EMR-IZSLER-2021-446731-020-01/2021	BA.1.17	S:L452R
hCoV-19/England/LSPA-2F975BF/2021	BA.1.16	S:L452R
hCoV-19/England/LSPA-2F995EA/2021	BA.1.17	S:L452R
hCoV-19/Wales/PHWC-PGRHDS/2021	BA.1.14	S:L452R
hCoV-19/USA/FL-CDC-ASC210610351/2021	BA.1.15	S:L452R
hCoV-19/USA/OH-CDC-ASC210610114/2021	BA.1.1.15	S:L452R
hCoV-19/England/NORT-YBNJWJ/2021	BA.1.17	S:L452R
hCoV-19/England/PHEP-YYN3GKT/2021	BA.1.15	S:L452R
hCoV-19/England/MILK-300A261/2021	BA.1.15	S:L452R
hCoV-19/England/BRBR-2F43D14/2021	BA.1.16	S:L452R
hCoV-19/England/LSPA-2FF975B/2021	BA.1.15	S:L452R
hCoV-19/England/ALDP-2FFE52F/2021	BA.1.15	S:L452R
hCoV-19/England/ALDP-2FFFF5D/2021	BA.1.15	S:L452R
hCoV-19/England/LSPA-2FF2B29/2021	BA.1.17	S:L452R
hCoV-19/England/NEWC-2FD603B/2021	BA.1.15	S:L452R
hCoV-19/USA/TX-HMH-MCoV-68484/2021	BA.1.15	S:L452R
hCoV-19/USA/TX-HMH-MCoV-68492/2021	BA.1.15	S:L452R
hCoV-19/USA/TX-HMH-MCoV-68530/2021	BA.1.15	S:L452R
hCoV-19/Argentina/INEI114557/2021	BA.1.17	S:L452R
hCoV-19/England/MILK-2D2A2DA/2021	BA.1.17	S:L452R
hCoV-19/England/MILK-2D34783/2021	BA.1.17	S:L452R
hCoV-19/England/MILK-2D2CE10/2021	BA.1.16	S:L452R
hCoV-19/England/MILK-2D534B4/2021	BA.1.16	S:L452R
hCoV-19/Scotland/QEUH-2D7946D/2021	BA.1.14	S:L452R
hCoV-19/England/MILK-2D87D07/2021	BA.1.15	S:L452R
hCoV-19/England/MILK-2D5BE81/2021	BA.1.1	S:L452R
hCoV-19/England/MILK-2D6EAC3/2021	BA.1.17	S:L452R
hCoV-19/England/MILK-2D55A0B/2021	BA.1.17	S:L452R
hCoV-19/USA/TX-HMH-MCoV-68588/2021	BA.1.1.14	S:L452R
hCoV-19/USA/TX-HMH-MCoV-68590/2021	BA.1.15	S:L452R
hCoV-19/USA/TX-HMH-MCoV-68607/2021	BA.1.15	S:L452R
hCoV-19/USA/TX-HMH-MCoV-68612/2021	BA.1.15	S:L452R
hCoV-19/USA/TX-HMH-MCoV-68616/2021	BA.1.15	S:L452R
hCoV-19/USA/TX-HMH-MCoV-68621/2021	BA.1.15	S:L452R
hCoV-19/USA/TX-HMH-MCoV-68667/2021	BA.1.15	S:L452R
hCoV-19/USA/TX-HMH-MCoV-68671/2021	BA.1.15	S:L452R
hCoV-19/USA/TX-HMH-MCoV-68692/2021	BA.1.15	S:L452R
hCoV-19/USA/TX-HMH-MCoV-68693/2021	BA.1.15	S:L452R
hCoV-19/USA/TX-HMH-MCoV-68700/2021	BA.1.15	S:L452R
hCoV-19/USA/TX-HMH-MCoV-68706/2021	BA.1.15	S:L452R
hCoV-19/USA/TX-HMH-MCoV-68717/2021	BA.1.15	S:L452R
hCoV-19/USA/TX-HMH-MCoV-68746/2021	BA.1.15	S:L452R
hCoV-19/England/ALDP-2DA8702/2021	BA.1.17	S:L452R
hCoV-19/England/MILK-2DAB9CD/2021	BA.1.16	S:L452R
hCoV-19/England/MILK-2D89260/2021	BA.1.15	S:L452R
hCoV-19/England/MILK-2D912ED/2021	BA.1.16	S:L452R
hCoV-19/England/MILK-2D8C2A9/2021	BA.1.16	S:L452R
hCoV-19/USA/TX-HMH-MCoV-69050/2021	BA.1.15	S:L452R
hCoV-19/USA/TX-HMH-MCoV-69047/2021	BA.1.15	S:L452R
hCoV-19/USA/TX-HMH-MCoV-69011/2021	BA.1.1	S:L452R
hCoV-19/USA/TX-HMH-MCoV-69017/2021	BA.1.15	S:L452R
hCoV-19/USA/TX-HMH-MCoV-69010/2021	BA.1.15	S:L452R
hCoV-19/USA/TX-HMH-MCoV-69004/2021	BA.1.15	S:L452R
hCoV-19/USA/TX-HMH-MCoV-69019/2021	BA.1.15	S:L452R
hCoV-19/USA/TX-HMH-MCoV-69028/2021	BA.1.1.14	S:L452R
hCoV-19/USA/TX-HMH-MCoV-69021/2021	BA.1.15	S:L452R
hCoV-19/USA/TX-HMH-MCoV-69035/2021	BA.1.15	S:L452R
hCoV-19/USA/TX-HMH-MCoV-69044/2021	BA.1.15	S:L452R
hCoV-19/USA/TX-HMH-MCoV-69022/2021	BA.1.15	S:L452R
hCoV-19/USA/TX-HMH-MCoV-69001/2021	BA.1.15	S:L452R
hCoV-19/USA/TX-HMH-MCoV-69034/2021	BA.1.15	S:L452R
hCoV-19/Scotland/QEUH-2EA46CC/2021	BA.1.9	M:I82T, S:L452R
hCoV-19/England/ALDP-2D1A97E/2021	BA.1.15	S:L452R
hCoV-19/England/ALDP-2DCBF6B/2021	BA.1.17	S:L452R
hCoV-19/England/MILK-2DD6A11/2021	BA.1.17	S:L452R
hCoV-19/Scotland/QEUH-2DBD306/2021	BA.1.7	S:L452R
hCoV-19/Scotland/QEUH-2DBCE9D/2021	BA.1.15	S:L452R
hCoV-19/Spain/MD-HULP-45413790/2021	BA.1.17	S:L452R
hCoV-19/England/QEUH-2E9DD58/2021	BA.1.17	S:L452R
hCoV-19/Scotland/QEUH-2DAFA7B/2021	BA.1.15	S:L452R
hCoV-19/England/BRBR-2DB584B/2021	BA.1.16	S:L452R
hCoV-19/Sweden/SUS0007318/2021	BA.1.14	S:L452R
hCoV-19/USA/TX-HMH-MCoV-68855/2021	BA.1.15	S:L452R
hCoV-19/Wales/PHWC-PGJE4T/2021	BA.1.16	S:L452R
hCoV-19/Wales/PHWC-PGJI76/2021	BA.1.17	S:L452R
hCoV-19/USA/TX-HMH-MCoV-69088/2021	BA.1.15	S:L452R
hCoV-19/England/BRBR-2DFE406/2021	BA.1.17	S:L452R
hCoV-19/England/BRBR-2DF82C6/2021	BA.1.16	S:L452R
hCoV-19/England/BRBR-2DF842A/2021	BA.1.14	S:L452R
hCoV-19/England/HSLL-2DFD1B5/2021	BA.1.17	S:L452R
hCoV-19/England/BRBR-2DCE162/2021	BA.1.17	S:L452R
hCoV-19/England/MILK-2DCD5FE/2021	BA.1.14	S:L452R
hCoV-19/England/MILK-2DEABBD/2021	BA.1.16	S:L452R
hCoV-19/England/ALDP-2DD35D7/2021	BA.1.17	S:L452R
hCoV-19/USA/TX-HMH-MCoV-68759/2021	BA.1.15	S:L452R
hCoV-19/USA/TX-HMH-MCoV-68761/2021	BA.1.15	S:L452R
hCoV-19/USA/TX-HMH-MCoV-68767/2021	BA.1.15	S:L452R
hCoV-19/USA/TX-HMH-MCoV-68770/2021	BA.1.15	S:L452R
hCoV-19/USA/TX-HMH-MCoV-68773/2021	BA.1.15	S:L452R
hCoV-19/USA/TX-HMH-MCoV-68774/2021	BA.1.15	S:L452R
hCoV-19/USA/TX-HMH-MCoV-68776/2021	BA.1.15	S:L452R
hCoV-19/USA/TX-HMH-MCoV-68779/2021	BA.1.15	S:L452R
hCoV-19/USA/TX-HMH-MCoV-68781/2021	BA.1.15	S:L452R
hCoV-19/USA/TX-HMH-MCoV-68801/2021	BA.1.15	S:L452R
hCoV-19/USA/TX-HMH-MCoV-68802/2021	BA.1.15	S:L452R
hCoV-19/USA/TX-HMH-MCoV-68816/2021	BA.1.15	S:L452R
hCoV-19/USA/TX-HMH-MCoV-68817/2021	BA.1.15	S:L452R
hCoV-19/USA/TX-HMH-MCoV-68818/2021	BA.1.15	S:L452R
hCoV-19/USA/TX-HMH-MCoV-68824/2021	BA.1.15	S:L452R
hCoV-19/USA/TX-HMH-MCoV-68830/2021	BA.1.15	S:L452R
hCoV-19/USA/TX-HMH-MCoV-68835/2021	BA.1.15	M:I82T, N:R203M, S:L452R
hCoV-19/USA/TX-HMH-MCoV-68839/2021	BA.1.15	S:L452R
hCoV-19/USA/OH-CDC-ASC210630979/2021	BA.1.1	S:L452R
hCoV-19/England/BRBR-2E1CF4C/2021	BA.1.15	S:L452R
hCoV-19/England/MILK-2E07B31/2021	BA.1.17	S:L452R
hCoV-19/England/NEWC-2E0E305/2021	BA.1.15	S:L452R
hCoV-19/England/MILK-2E0A239/2021	BA.1.9	M:I82T, S:L452R
hCoV-19/England/ALDP-30229D7/2021	BA.1.17	S:L452R
hCoV-19/England/LSPA-3023C91/2021	BA.1.5	S:L452R
hCoV-19/England/MILK-300F509/2021	BA.1.15	S:L452R
hCoV-19/England/MILK-300F4EE/2021	BA.1.16	S:L452R
hCoV-19/Spain/CT-HUGTiPM065SO0A8/2021	BA.1.17	S:L452R
hCoV-19/USA/IL-CDC-ASC210634667/2021	BA.1.14	S:L452R
hCoV-19/USA/OH-CDC-ASC210631452/2021	BA.1.1	S:L452R
hCoV-19/USA/AZ-ASU27500/2021	BA.1.9	S:L452R
hCoV-19/Thailand/NIC_BKK_SEQ22726/2021	BA.1.15	S:L452R
hCoV-19/Switzerland/GE-HUG-36332295/2021	BA.1.15	S:L452R
hCoV-19/England/ALDP-302FDB0/2021	BA.1.9	S:L452R
hCoV-19/England/MILK-303A81B/2021	BA.1.1	S:L452R
hCoV-19/England/MILK-302DC88/2021	BA.1.1	S:L452R
hCoV-19/England/PHEC-3X0AAXF6/2021	BA.1.17	S:L452R
hCoV-19/England/MILK-301F7B5/2021	BA.1.16	S:L452R
hCoV-19/England/MILK-300C0A1/2021	BA.1.15	S:L452R
hCoV-19/Italy/SIC-CQRC-3077558/2021	BA.1.16	S:L452R
hCoV-19/Italy/SIC-CQRC-3065522/2021	BA.1.17	S:L452R
hCoV-19/Italy/SIC-CQRC-3041953/2021	BA.1.1	S:L452R
hCoV-19/Italy/SIC-CQRC-3041990/2021	BA.1.16	S:L452R
hCoV-19/Israel/ICH-741109947/2021	BA.1.15	S:L452R
hCoV-19/Italy/SIC_CQRC_2997687/2021	BA.1.1.13	S:L452R
hCoV-19/Italy/LOM_Policlinico_Milano_87692702/2021	BA.1.1	S:L452R
hCoV-19/Italy/SIC-CQRC-3077323/2021	BA.1.1.11	S:L452R
hCoV-19/Italy/SIC-CQRC-3056430/2021	BA.1.17	S:L452R
hCoV-19/Italy/SIC-CQRC-3421143647/2021	BA.1.15	S:L452R
hCoV-19/Italy/SIC-CQRC-3421142756/2021	BA.1.1	S:L452R
hCoV-19/Italy/SIC-CQRC-3022591/2021	BA.1.17	S:L452R
hCoV-19/USA/MS-MSPHL-0710/2021	BA.1.15	S:L452R
hCoV-19/USA/WA-CDC-UW21121897402/2021	BA.1.15	N:R203M, S:L452R
hCoV-19/Wales/PHWC-PGW9JG/2021	BA.1.1	M:I82T, S:L452R
hCoV-19/USA/NJ-CDC-IBX564737772178/2021	BA.1.1.8	M:I82T, N:R203M, S:L452R
hCoV-19/England/NORT-YBKPZX/2021	BA.1.14	S:L452R
hCoV-19/USA/TX-CDC-ASC210643178/2021	BA.1.1.11	M:I82T, S:L452R
hCoV-19/USA/NH-CDC-LC0450234/2022	BA.1.9	S:L452R
hCoV-19/USA/NJ-CDC-IBX634712141852/2021	BA.1.1	M:I82T, S:L452R
hCoV-19/Kazakhstan/2870/2021	BA.1.1.15	M:I82T, N:R203M, S:L452R
hCoV-19/Germany/SH-RKI-I-436278/2022	BA.1.17	S:L452R
hCoV-19/Kazakhstan/2869/2021	BA.1.1.11	N:R203M, S:L452R
hCoV-19/Kazakhstan/2846/2021	BA.1.14	S:L452R
hCoV-19/Kazakhstan/2871/2021	BA.1.1.15	S:L452R
hCoV-19/Kazakhstan/2833/2021	BA.1.17	M:I82T, S:L452R
hCoV-19/Germany/RP-RKI-I-427450/2021	BA.1.15	N:R203M, S:L452R
hCoV-19/USA/MN-CDC-ASC210642406/2021	BA.1.9	M:I82T, S:L452R
hCoV-19/Switzerland/BL-ETHZ-35455450/2021	BA.1.1.11	M:I82T, N:R203M, S:L452R
hCoV-19/Wales/ALDP-30DB269/2021	BA.1.17	M:I82T, S:L452R
hCoV-19/USA/GA-CDC-ASC210641613/2021	BA.1.15	M:I82T, S:L452R
hCoV-19/USA/NJ-CDC-ASC210642300/2021	BA.1.9	M:I82T, S:L452R
hCoV-19/Germany/HH-RKI-I-416859/2021	BA.1.1.1	N:R203M, S:L452R
hCoV-19/USA/OH-CDC-ASC210639535/2021	BA.1.1.15	M:I82T, S:L452R
hCoV-19/USA/NJ-CDC-IBX287131076720/2021	BA.1.1	M:I82T, S:L452R
hCoV-19/Germany/BY-RKI-I-430731/2021	BA.1.17	M:I82T, S:L452R
hCoV-19/USA/FL-CDC-ASC210643195/2021	BA.1.1	M:I82T, S:L452R
hCoV-19/USA/NJ-CDC-IBX308597518592/2021	BA.1.17	M:I82T, S:L452R
hCoV-19/Germany/BY-RKI-I-426346/2021	BA.1.15	N:R203M, S:L452R
hCoV-19/Germany/TH-RKI-I-421578/2021	BA.1.16	M:I82T, N:R203M, S:L452R
hCoV-19/Germany/BW-RKI-I-419058/2021	BA.1.12	N:R203M, S:L452R
hCoV-19/Germany/SH-RKI-I-429705/2021	BA.1.17	S:L452R
hCoV-19/England/PHEP-YYDBIES/2021	BA.1.15.1	S:L452R
hCoV-19/England/BRBR-30FC192/2021	BA.1.15	M:I82T, S:L452R
hCoV-19/USA/NJ-CDC-IBX444688865414/2021	BA.1.1	M:I82T, S:L452R
hCoV-19/Switzerland/BE-IFIK-211227-os-66/2021	BA.1.1.11	S:L452R
hCoV-19/USA/TN-CDC-ASC210641234/2021	BA.1.1.1	M:I82T, S:L452R
hCoV-19/USA/UT-UPHL-220115943393/2021	BA.1.1	M:I82T, S:L452R
hCoV-19/Germany/BY-RKI-I-426606/2021	BA.1.17	S:L452R
hCoV-19/Germany/SN-RKI-I-431890/2021	BA.1.1.1	S:L452R
hCoV-19/USA/TX-HMH-MCoV-69986/2021	BA.1.15	M:I82T, S:L452R
hCoV-19/USA/TX-HMH-MCoV-69874/2021	BA.1.15	M:I82T, S:L452R
hCoV-19/USA/TX-HMH-MCoV-69981/2021	BA.1.15	M:I82T, S:L452R
hCoV-19/USA/TX-HMH-MCoV-69984/2021	BA.1.15	M:I82T, S:L452R
hCoV-19/USA/TX-HMH-MCoV-70104/2021	BA.1.15	M:I82T, S:L452R
hCoV-19/USA/TX-HMH-MCoV-69743/2021	BA.1.9	M:I82T, S:L452R
hCoV-19/USA/TX-HMH-MCoV-69868/2021	BA.1.15	M:I82T, S:L452R
hCoV-19/USA/TX-HMH-MCoV-69649/2021	BA.1.9	M:I82T, S:L452R
hCoV-19/USA/TX-HMH-MCoV-69875/2021	BA.1.15	M:I82T, S:L452R
hCoV-19/USA/TX-HMH-MCoV-70090/2021	BA.1.15	M:I82T, S:L452R
hCoV-19/USA/TX-HMH-MCoV-70094/2021	BA.1.15	M:I82T, S:L452R
hCoV-19/USA/IL-CDC-LC0443559/2021	BA.1.15	S:L452R
hCoV-19/USA/AZ-TG1140165/2021	BA.1.1	M:I82T, S:L452R
hCoV-19/USA/TX-HMH-MCoV-69636/2021	BA.1.15	M:I82T, S:L452R
hCoV-19/USA/TX-HMH-MCoV-69982/2021	BA.1.15	M:I82T, S:L452R
hCoV-19/USA/TX-HMH-MCoV-70097/2021	BA.1.15	M:I82T, S:L452R
hCoV-19/USA/TX-HMH-MCoV-69980/2021	BA.1.15	M:I82T, S:L452R
hCoV-19/USA/TX-HMH-MCoV-70080/2021	BA.1.15	M:I82T, S:L452R
hCoV-19/USA/IL-CDC-ASC210567573/2021	BA.1.9	M:I82T, S:L452R
hCoV-19/USA/TX-HMH-MCoV-69966/2021	BA.1.15	M:I82T, S:L452R
hCoV-19/USA/WV-CDC-ASC210639005/2021	BA.1.15	M:I82T, S:L452R
hCoV-19/USA/TX-HMH-MCoV-70069/2021	BA.1.15	M:I82T, S:L452R
hCoV-19/USA/TX-HMH-MCoV-70076/2021	BA.1.15	M:I82T, S:L452R
hCoV-19/USA/NY-CDC-LC0443117/2021	BA.1	S:L452R
hCoV-19/USA/TX-HMH-MCoV-70072/2021	BA.1.15	M:I82T, S:L452R
hCoV-19/USA/TX-HMH-MCoV-70064/2021	BA.1.1	M:I82T, S:L452R
hCoV-19/USA/TX-HMH-MCoV-70059/2021	BA.1.15	M:I82T, S:L452R
hCoV-19/USA/NY-CDC-ASC210638678/2021	BA.1.15	M:I82T, S:L452R
hCoV-19/USA/TX-HMH-MCoV-70048/2021	BA.1.15	M:I82T, S:L452R
hCoV-19/USA/AZ-TG1140172/2021	BA.1.1.1	S:L452R
hCoV-19/USA/FL-CDC-ASC210641423/2021	BA.1.1.15	M:I82T, S:L452R
hCoV-19/USA/AZ-TG1140202/2021	BA.1.15	M:I82T, S:L452R
hCoV-19/England/PHEP-YYN6UDE/2021	BA.1.15	S:L452R
hCoV-19/USA/AZ-TG1140050/2021	BA.1.1.16	M:I82T, S:L452R
hCoV-19/Scotland/PLYM-30B4767/2021	BA.1.15	M:I82T, S:L452R
hCoV-19/USA/AZ-TG1140198/2021	BA.1.1.1	M:I82T, S:L452R
hCoV-19/USA/AZ-TG1140200/2021	BA.1.1.16	M:I82T, S:L452R
hCoV-19/England/ALDP-307F16A/2021	BA.1.1	M:I82T, S:L452R
hCoV-19/Scotland/QEUH-308CDFD/2021	BA.1.15	M:I82T, S:L452R
hCoV-19/USA/TX-HMH-MCoV-69836/2021	BA.1.15	M:I82T, S:L452R
hCoV-19/Scotland/QEUH-3035F93/2021	BA.1.16	M:I82T, S:L452R
hCoV-19/USA/TX-HMH-MCoV-69822/2021	BA.1.1	M:I82T, S:L452R
hCoV-19/USA/TX-HMH-MCoV-70131/2021	BA.1.15	M:I82T, S:L452R
hCoV-19/USA/TX-HMH-MCoV-69824/2021	BA.1.15	M:I82T, S:L452R
hCoV-19/USA/TX-HMH-MCoV-69828/2021	BA.1.15	M:I82T, S:L452R
hCoV-19/USA/IL-CDC-LC0443539/2021	BA.1.1	S:L452R
hCoV-19/USA/TX-HMH-MCoV-69934/2021	BA.1.15	M:I82T, S:L452R
hCoV-19/England/PHEP-YYN7W1K/2021	BA.1.1.7	S:L452R
hCoV-19/env/USA/CA-SEARCH-63561/2021	BA.1.1.1	N:R203M, S:L452R
hCoV-19/USA/TX-HMH-MCoV-69788/2021	BA.1.15	M:I82T, S:L452R
hCoV-19/USA/TX-HMH-MCoV-69928/2021	BA.1.15	M:I82T, S:L452R
hCoV-19/Italy/APU-IZSPB-PT5497/2021	BA.1.17	S:L452R
hCoV-19/USA/AZ-TG1140151/2021	BA.1.1.16	M:I82T, S:L452R
hCoV-19/England/LSPA-306D7D6/2021	BA.1.16	M:I82T, S:L452R
hCoV-19/USA/TX-HMH-MCoV-69578/2021	BA.1.15	M:I82T, S:L452R
hCoV-19/USA/TX-HMH-MCoV-69795/2021	BA.1.15	M:I82T, S:L452R
hCoV-19/USA/AZ-TG1140135/2021	BA.1.1.16	M:I82T, S:L452R
hCoV-19/USA/TX-HMH-MCoV-69577/2021	BA.1.15	M:I82T, S:L452R
hCoV-19/USA/TX-HMH-MCoV-69767/2021	BA.1.15	M:I82T, S:L452R
hCoV-19/England/PHEP-YYNH1RM/2021	BA.1.1	S:L452R
hCoV-19/USA/TX-HMH-MCoV-70008/2021	BA.1.15	M:I82T, S:L452R
hCoV-19/USA/TX-HMH-MCoV-70017/2021	BA.1.15	M:I82T, S:L452R
hCoV-19/USA/TX-HMH-MCoV-69779/2021	BA.1.15	M:I82T, S:L452R
hCoV-19/Germany/NW-RKI-I-412214/2021	BA.1.1.1	M:I82T, N:R203M, S:L452R
hCoV-19/USA/PA-CDC-ASC210568707/2021	BA.1.9	M:I82T, S:L452R
hCoV-19/USA/MA-CDCBI-CRSP_PFLN3GVB3PB7VKTS/2022	BA.1.1.1	M:I82T, N:R203M, S:L452R
hCoV-19/USA/TX-HMH-MCoV-69764/2021	BA.1.15	S:L452R
hCoV-19/England/PHEP-YYNH318/2021	BA.1.15.1	S:L452R
hCoV-19/USA/TX-HMH-MCoV-69891/2021	BA.1.15	M:I82T, S:L452R
hCoV-19/USA/TX-HMH-MCoV-69878/2021	BA.1.15	M:I82T, S:L452R
hCoV-19/USA/TX-HMH-MCoV-69761/2021	BA.1.15	M:I82T, S:L452R
hCoV-19/USA/TX-HMH-MCoV-69884/2021	BA.1.15	M:I82T, S:L452R
hCoV-19/USA/AZ-TG1140162/2021	BA.1.1	M:I82T, S:L452R
hCoV-19/USA/TX-HMH-MCoV-69995/2021	BA.1.15	M:I82T, S:L452R
hCoV-19/env/USA/CA-SEARCH-63586/2021	BA.1.1.1	M:I82T, S:L452R
hCoV-19/USA/TX-HMH-MCoV-69880/2021	BA.1.15	M:I82T, S:L452R
hCoV-19/USA/TX-HMH-MCoV-69883/2021	BA.1.15	M:I82T, S:L452R
hCoV-19/England/LSPA-30A0E3C/2021	BA.1.9	M:I82T, S:L452R
hCoV-19/Italy/SIC-CQRC-3069046/2021	BA.1.16	S:L452R
hCoV-19/USA/IL-CDC-ASC210636211/2021	BA.1.15	M:I82T, S:L452R
hCoV-19/USA/MD-CDC-LC0438034/2021	BA.1.15	S:L452R
hCoV-19/USA/VA-CDC-LC0438137/2021	BA.1.14	M:I82T, S:L452R
hCoV-19/USA/VA-CDC-LC0438106/2021	BA.1.7	S:L452R
hCoV-19/USA/VA-CDC-ASC210627531/2021	BA.1.14	M:I82T, S:L452R
hCoV-19/England/NEWC-3054E91/2021	BA.1.9	M:I82T, S:L452R
hCoV-19/USA/OH-CDC-ASC210637245/2021	BA.1.1.11	M:I82T, S:L452R
hCoV-19/Spain/CT-HUGTiPM066GT7C5/2021	BA.1.17	M:I82T, S:L452R
hCoV-19/Italy/SIC-CQRC-3103826/2021	BA.1.1.1	N:R203M, S:L452R
hCoV-19/Italy/SIC-CQRC-3080248/2021	BA.1.17	S:L452R
hCoV-19/USA/MD-CDC-LC0437900/2021	BA.1.15	N:R203M, S:L452R
hCoV-19/England/ALDP-3013450/2021	BA.1.15	M:I82T, S:L452R
hCoV-19/Italy/SIC-CQRC-3101431/2021	BA.1.17	N:R203M, S:L452R
hCoV-19/England/ALDP-30436F7/2021	BA.1.17	M:I82T, S:L452R
hCoV-19/USA/NJ-CDC-IBX559858220412/2021	BA.1.9	M:I82T, S:L452R
hCoV-19/Italy/SIC-CQRC-3100506/2021	BA.1.15	S:L452R
hCoV-19/Italy/SIC-CQRC-3421146100/2021	BA.1.16	N:R203M, S:L452R
hCoV-19/USA/IL-CDC-ASC210636012/2021	BA.1.15	M:I82T, S:L452R
hCoV-19/Italy/SIC-CQRC-3421146148/2021	BA.1.1.15	M:I82T, S:L452R
hCoV-19/Italy/SIC-CQRC-3099623/2021	BA.1.17	S:L452R
hCoV-19/Italy/SIC-CQRC-3421145962/2021	BA.1.15	N:R203M, S:L452R
hCoV-19/Italy/SIC-CQRC-3097691/2021	BA.1.1.11	N:R203M, S:L452R
hCoV-19/Turkey/HSGM-F13626/2021	BA.1.15	S:L452R
hCoV-19/USA/NE-CUMC_21361048/2021	BA.1.14	S:L452R
hCoV-19/USA/NE-CUMC_21361077/2022	BA.1.15	S:L452R
hCoV-19/USA/NE-CUMC_21361085/2021	BA.1.1	S:L452R
hCoV-19/Turkey/HSGM-F13671/2021	BA.1.15	S:L452R
hCoV-19/Turkey/HSGM-F13572/2021	BA.1.17	S:L452R
hCoV-19/env/Austria/CeMM21611/2021	BA.1.17	S:L452R
hCoV-19/Turkey/HSGM-F13610/2021	BA.1.15	S:L452R
hCoV-19/Turkey/HSGM-F13679/2021	BA.1.15	S:L452R
hCoV-19/Turkey/HSGM-F13443/2021	BA.1.15	S:L452R
hCoV-19/Turkey/HSGM-F13452/2021	BA.1.15	S:L452R
hCoV-19/Turkey/HSGM-F13435/2021	BA.1.15	S:L452R
hCoV-19/Turkey/HSGM-F13656/2021	BA.1.15	S:L452R
hCoV-19/Turkey/HSGM-F13480/2021	BA.1.1	S:L452R
hCoV-19/Turkey/HSGM-F13743/2021	BA.1.17	S:L452R
hCoV-19/Turkey/HSGM-F13404/2021	BA.1.15	S:L452R
hCoV-19/Turkey/HSGM-F13618/2021	BA.1.15	S:L452R
hCoV-19/Turkey/HSGM-F13421/2021	BA.1.15	S:L452R
hCoV-19/Turkey/HSGM-F13658/2021	BA.1.15	S:L452R
hCoV-19/Turkey/HSGM-F13673/2021	BA.1.17	S:L452R
hCoV-19/Turkey/HSGM-F13665/2021	BA.1.15	S:L452R
hCoV-19/Turkey/HSGM-F13537/2021	BA.1.15	S:L452R
hCoV-19/Turkey/HSGM-F13539/2021	BA.1.15	S:L452R
hCoV-19/Turkey/HSGM-F13614/2021	BA.1.1	S:L452R
hCoV-19/Turkey/HSGM-F13727/2021	BA.1.15	S:L452R
hCoV-19/Turkey/HSGM-F13448/2021	BA.1.15	S:L452R
hCoV-19/Turkey/HSGM-F13661/2021	BA.1.15	S:L452R
hCoV-19/Turkey/HSGM-F13692/2021	BA.1.15	S:L452R
hCoV-19/Turkey/HSGM-F13481/2021	BA.1.15	S:L452R
hCoV-19/Turkey/HSGM-F13663/2021	BA.1.15	S:L452R
hCoV-19/Turkey/HSGM-F13525/2021	BA.1.15	S:L452R
hCoV-19/Turkey/HSGM-F13457/2021	BA.1.1	S:L452R
hCoV-19/Turkey/HSGM-F13654/2021	BA.1.15	S:L452R
hCoV-19/Turkey/HSGM-F13668/2021	BA.1.15	S:L452R
hCoV-19/Turkey/HSGM-F13615/2021	BA.1.1	S:L452R
hCoV-19/Thailand/NIC_BKK_SEQ23557/2021	BA.1.1	S:L452R
hCoV-19/Turkey/HSGM-F13476/2021	BA.1.15	S:L452R
hCoV-19/Thailand/NIC-NST-SEQ23169/2021	BA.1.15	S:L452R
hCoV-19/Turkey/HSGM-F13542/2021	BA.1.1	S:L452R
hCoV-19/Turkey/HSGM-F13640/2021	BA.1.17	S:L452R
hCoV-19/Turkey/HSGM-F13578/2021	BA.1.15	S:L452R
hCoV-19/Turkey/HSGM-F13551/2021	BA.1.16	S:L452R
hCoV-19/Turkey/HSGM-F13530/2021	BA.1.1	S:L452R
hCoV-19/Turkey/HSGM-F13522/2021	BA.1.17	S:L452R
hCoV-19/Turkey/HSGM-F13445/2021	BA.1.1	S:L452R
hCoV-19/Thailand/NIC_CBI_SEQ23413/2021	BA.1.15	S:L452R
hCoV-19/Morocco/IPM20386343/2021	BA.1.13.1	S:L452R
hCoV-19/Turkey/HSGM-F13715/2021	BA.1.15	S:L452R
hCoV-19/Turkey/HSGM-F13675/2021	BA.1.15	S:L452R
hCoV-19/Turkey/HSGM-F13425/2021	BA.1.15	S:L452R
hCoV-19/Turkey/HSGM-F13473/2021	BA.1.17	S:L452R
hCoV-19/Turkey/HSGM-F13441/2021	BA.1.15	S:L452R
hCoV-19/Thailand/NIC-NST-SEQ23167/2021	BA.1.1.4	S:L452R
hCoV-19/Turkey/HSGM-F13732/2021	BA.1.4	S:L452R
hCoV-19/Turkey/HSGM-F13690/2021	BA.1.17	S:L452R
hCoV-19/Turkey/HSGM-F13521/2021	BA.1.1	S:L452R
hCoV-19/Turkey/HSGM-F13624/2021	BA.1.15	S:L452R
hCoV-19/Turkey/HSGM-F13474/2021	BA.1.15	S:L452R
hCoV-19/Turkey/HSGM-F13735/2021	BA.1.15	S:L452R
hCoV-19/Turkey/HSGM-F13485/2021	BA.1.15	S:L452R
hCoV-19/Turkey/HSGM-F13536/2021	BA.1.17	S:L452R
hCoV-19/Turkey/HSGM-F13655/2021	BA.1.15	S:L452R
hCoV-19/Turkey/HSGM-F13710/2021	BA.1.17	S:L452R
hCoV-19/Turkey/HSGM-F13645/2021	BA.1.15	S:L452R
hCoV-19/Turkey/HSGM-F13733/2021	BA.1.4	S:L452R
hCoV-19/Turkey/HSGM-F13728/2021	BA.1.15	S:L452R
hCoV-19/Turkey/HSGM-F13580/2021	BA.1.1	S:L452R
hCoV-19/Turkey/HSGM-F13471/2021	BA.1.17	S:L452R
hCoV-19/Thailand/NIC_CBI_SEQ23423/2021	BA.1.15	S:L452R
hCoV-19/Turkey/HSGM-F13652/2021	BA.1.15	S:L452R
hCoV-19/Turkey/HSGM-F13748/2021	BA.1.15	S:L452R
hCoV-19/Turkey/HSGM-F13450/2021	BA.1.15	S:L452R
hCoV-19/Turkey/HSGM-F13455/2021	BA.1.15	S:L452R
hCoV-19/Morocco/IPM20386344/2021	BA.1.13.1	S:L452R
hCoV-19/Turkey/HSGM-F13653/2021	BA.1.15	S:L452R
hCoV-19/Turkey/HSGM-F13592/2021	BA.1.15	S:L452R
hCoV-19/Turkey/HSGM-F13574/2021	BA.1.17	S:L452R
hCoV-19/Turkey/HSGM-F13456/2021	BA.1.17	S:L452R
hCoV-19/Turkey/HSGM-F13629/2021	BA.1.15	S:L452R
hCoV-19/Turkey/HSGM-F13460/2021	BA.1.15	S:L452R
hCoV-19/Turkey/HSGM-F13459/2021	BA.1.15	S:L452R
hCoV-19/Turkey/HSGM-F13417/2021	BA.1.15	S:L452R
hCoV-19/Turkey/HSGM-F13649/2021	BA.1.4	S:L452R
hCoV-19/Turkey/HSGM-F13700/2021	BA.1.15	S:L452R
hCoV-19/Turkey/HSGM-F13691/2021	BA.1.15	S:L452R
hCoV-19/Turkey/HSGM-F13709/2021	BA.1.1.15	S:L452R
hCoV-19/Turkey/HSGM-F13642/2021	BA.1.17	S:L452R
hCoV-19/Turkey/HSGM-F13698/2021	BA.1.15	S:L452R
hCoV-19/Morocco/IPM20386346/2021	BA.1.13.1	S:L452R
hCoV-19/Turkey/HSGM-F13672/2021	BA.1.15	S:L452R
hCoV-19/Turkey/HSGM-F13507/2021	BA.1.16	S:L452R
hCoV-19/Turkey/HSGM-F13650/2021	BA.1.15	S:L452R
hCoV-19/Turkey/HSGM-F13632/2021	BA.1.16	S:L452R
hCoV-19/Turkey/HSGM-F13590/2021	BA.1.15	S:L452R
hCoV-19/Turkey/HSGM-F13670/2021	BA.1.15	S:L452R
hCoV-19/Turkey/HSGM-F13518/2021	BA.1.1	S:L452R
hCoV-19/Turkey/HSGM-F13593/2021	BA.1.15	S:L452R
hCoV-19/Turkey/HSGM-F13635/2021	BA.1.14	S:L452R
hCoV-19/Turkey/HSGM-F13613/2021	BA.1.15	S:L452R
hCoV-19/Turkey/HSGM-F13601/2021	BA.1.15	S:L452R
hCoV-19/Turkey/HSGM-F13451/2021	BA.1.17	S:L452R
hCoV-19/Turkey/HSGM-F13433/2021	BA.1.15	S:L452R
hCoV-19/Turkey/HSGM-F13597/2021	BA.1.15	S:L452R
hCoV-19/Turkey/HSGM-F13659/2021	BA.1.15	S:L452R
hCoV-19/Turkey/HSGM-F13740/2021	BA.1.15	S:L452R
hCoV-19/Turkey/HSGM-F13605/2021	BA.1.15	S:L452R
hCoV-19/Turkey/HSGM-F13444/2021	BA.1.15	S:L452R
hCoV-19/Turkey/HSGM-F13699/2021	BA.1.15	S:L452R
hCoV-19/Turkey/HSGM-F13585/2021	BA.1.15	S:L452R
hCoV-19/Turkey/HSGM-F13646/2021	BA.1.15	S:L452R
hCoV-19/Turkey/HSGM-F13565/2021	BA.1.15	S:L452R
hCoV-19/Turkey/HSGM-F13543/2021	BA.1.15	S:L452R
hCoV-19/Turkey/HSGM-F13669/2021	BA.1.1	S:L452R
hCoV-19/Turkey/HSGM-F13666/2021	BA.1.1	S:L452R
hCoV-19/Turkey/HSGM-F13560/2021	BA.1.15	S:L452R
hCoV-19/Turkey/HSGM-F13600/2021	BA.1.17	S:L452R
hCoV-19/Turkey/HSGM-F13631/2021	BA.1.15	S:L452R
hCoV-19/Turkey/HSGM-F13604/2021	BA.1.15	S:L452R
hCoV-19/Thailand/NIC-BKK-SEQ23080/2021	BA.1.16	S:L452R
hCoV-19/Turkey/HSGM-F13589/2021	BA.1.1	S:L452R
hCoV-19/Turkey/HSGM-F13706/2021	BA.1.15	S:L452R
hCoV-19/Turkey/HSGM-F13664/2021	BA.1.15	S:L452R
hCoV-19/Turkey/HSGM-F13402/2021	BA.1.17	S:L452R
hCoV-19/Turkey/HSGM-F13453/2021	BA.1.15	S:L452R
hCoV-19/Turkey/HSGM-F13651/2021	BA.1.1	S:L452R
hCoV-19/Turkey/HSGM-F13697/2021	BA.1.1	S:L452R
hCoV-19/Turkey/HSGM-F13562/2021	BA.1.15	S:L452R
hCoV-19/Thailand/NIC_BKK_SEQ23587/2021	BA.1.15	S:L452R
hCoV-19/Turkey/HSGM-F13569/2021	BA.1.15	S:L452R
hCoV-19/Turkey/HSGM-F13517/2021	BA.1.15	S:L452R
hCoV-19/Turkey/HSGM-F13703/2021	BA.1.1	S:L452R
hCoV-19/Turkey/HSGM-F13561/2021	BA.1.1	S:L452R
hCoV-19/Turkey/HSGM-F13696/2021	BA.1.15	S:L452R
hCoV-19/Turkey/HSGM-F13739/2021	BA.1.15	S:L452R
hCoV-19/Turkey/HSGM-F13680/2021	BA.1.17	S:L452R
hCoV-19/Turkey/HSGM-F13771/2021	BA.1.15	S:L452R
hCoV-19/Turkey/HSGM-F13637/2021	BA.1.15	S:L452R
hCoV-19/Turkey/HSGM-F13431/2021	BA.1.15	S:L452R
hCoV-19/Turkey/HSGM-F13534/2021	BA.1.1.1	S:L452R
hCoV-19/Turkey/HSGM-F13428/2021	BA.1.17	S:L452R
hCoV-19/Turkey/HSGM-F13494/2021	BA.1.15	S:L452R
hCoV-19/Turkey/HSGM-F13617/2021	BA.1.1	S:L452R
hCoV-19/Turkey/HSGM-F13558/2021	BA.1.15	S:L452R
hCoV-19/Turkey/HSGM-F13713/2021	BA.1.15	S:L452R
hCoV-19/Turkey/HSGM-F13724/2021	BA.1.15	S:L452R
hCoV-19/Turkey/HSGM-F13576/2021	BA.1.15	S:L452R
hCoV-19/Turkey/HSGM-F13667/2021	BA.1.15	S:L452R
hCoV-19/Turkey/HSGM-F13676/2021	BA.1.15	S:L452R
hCoV-19/Turkey/HSGM-F13524/2021	BA.1.15	S:L452R
hCoV-19/Thailand/NIC_BKK_SEQ23565/2021	BA.1.1.1	S:L452R
hCoV-19/Turkey/HSGM-F13677/2021	BA.1.15	S:L452R
hCoV-19/Turkey/HSGM-F13660/2021	BA.1.15	S:L452R
hCoV-19/Turkey/HSGM-F13511/2021	BA.1.15	S:L452R
hCoV-19/Turkey/HSGM-F13767/2021	BA.1.15	S:L452R
hCoV-19/Turkey/HSGM-F13532/2021	BA.1.14	S:L452R
hCoV-19/Turkey/HSGM-F13603/2021	BA.1.17	S:L452R
hCoV-19/Turkey/HSGM-F13684/2021	BA.1.15	S:L452R
hCoV-19/Turkey/HSGM-F13535/2021	BA.1.15	S:L452R
hCoV-19/Thailand/NIC-BKK-SEQ23083/2021	BA.1.1	S:L452R
hCoV-19/Turkey/HSGM-F13512/2021	BA.1.15	S:L452R
hCoV-19/Turkey/HSGM-F13478/2021	BA.1.17	S:L452R
hCoV-19/Turkey/HSGM-F13731/2021	BA.1.1	S:L452R
hCoV-19/Turkey/HSGM-F13486/2021	BA.1.15	S:L452R
hCoV-19/Turkey/HSGM-F13559/2021	BA.1.1	S:L452R
hCoV-19/Turkey/HSGM-F13633/2021	BA.1.15	S:L452R
hCoV-19/Turkey/HSGM-F13636/2021	BA.1.15	S:L452R
hCoV-19/Thailand/NIC_BKK_SEQ23542/2021	BA.1.1.15	S:L452R
hCoV-19/Turkey/HSGM-F13582/2021	BA.1.15	S:L452R
hCoV-19/Morocco/IPM20386504/2021	BA.1.13.1	S:L452R
hCoV-19/Turkey/HSGM-F13711/2021	BA.1.15	S:L452R
hCoV-19/Turkey/HSGM-F13729/2021	BA.1.15	S:L452R
hCoV-19/Turkey/HSGM-F13546/2021	BA.1.15	S:L452R
hCoV-19/Thailand/NIC_BKK_SEQ23555/2021	BA.1.15	S:L452R
hCoV-19/Turkey/HSGM-F13506/2021	BA.1.15	S:L452R
hCoV-19/Turkey/HSGM-F13683/2021	BA.1.15	S:L452R
hCoV-19/Turkey/HSGM-F13429/2021	BA.1.15	S:L452R
hCoV-19/Turkey/HSGM-F13462/2021	BA.1.15	S:L452R
hCoV-19/Turkey/HSGM-F13573/2021	BA.1.17	S:L452R
hCoV-19/Turkey/HSGM-F13418/2021	BA.1.15	S:L452R
hCoV-19/Turkey/HSGM-F13552/2021	BA.1.15	S:L452R
hCoV-19/Turkey/HSGM-F13638/2021	BA.1.1.1	S:L452R
hCoV-19/Turkey/HSGM-F13611/2021	BA.1.17	S:L452R
hCoV-19/Turkey/HSGM-F13725/2021	BA.1.15	S:L452R
hCoV-19/Turkey/HSGM-F13568/2021	BA.1.15	S:L452R
hCoV-19/Turkey/HSGM-F13689/2021	BA.1.15	S:L452R
hCoV-19/Turkey/HSGM-F13746/2021	BA.1.16	S:L452R
hCoV-19/Turkey/HSGM-F13447/2021	BA.1.15	S:L452R
hCoV-19/Turkey/HSGM-F13718/2021	BA.1.15	S:L452R
hCoV-19/Turkey/HSGM-F13449/2021	BA.1.1	S:L452R
hCoV-19/Turkey/HSGM-F13591/2021	BA.1.16	S:L452R
hCoV-19/Turkey/HSGM-F13644/2021	BA.1.15	S:L452R
hCoV-19/Turkey/HSGM-F13608/2021	BA.1.15	S:L452R
hCoV-19/Turkey/HSGM-F13674/2021	BA.1.16	S:L452R
hCoV-19/Turkey/HSGM-F13466/2021	BA.1.15	S:L452R
hCoV-19/Turkey/HSGM-F13643/2021	BA.1.17	S:L452R
hCoV-19/Turkey/HSGM-F13563/2021	BA.1.15	S:L452R
hCoV-19/Turkey/HSGM-F13583/2021	BA.1.15	S:L452R
hCoV-19/Turkey/HSGM-F13606/2021	BA.1.15	S:L452R
hCoV-19/Turkey/HSGM-F13678/2021	BA.1.1	S:L452R
hCoV-19/Turkey/HSGM-F13630/2021	BA.1.15	S:L452R
hCoV-19/Turkey/HSGM-F13482/2021	BA.1.15	S:L452R
hCoV-19/Turkey/HSGM-F13730/2021	BA.1.12	S:L452R
hCoV-19/Turkey/HSGM-F13639/2021	BA.1.15	S:L452R
hCoV-19/Thailand/NIC_NBI_SEQ23516/2021	BA.1.17	S:L452R
hCoV-19/Italy/LAZ-AMC-2112234329-DS/2021	BA.1.4	S:L452R
hCoV-19/Luxembourg/LNS4625040/2021	BA.1.17	S:L452R
hCoV-19/CzechRepublic/CSQ4486/2021	BA.1.14	S:L452R
hCoV-19/CzechRepublic/CSQ4552/2021	BA.1.17	S:L452R
hCoV-19/Indonesia/JK-NIHRD-MI.22.00161/2021	BA.1.14	S:L452R
hCoV-19/Spain/CT-HUVH-E28107/2021	BA.1.17	S:L452R
hCoV-19/Spain/CT-HUVH-E02254/2021	BA.1.1	S:L452R
hCoV-19/Spain/CT-HUVH-E00953/2021	BA.1.17	S:L452R
hCoV-19/Brazil/AM-FIOCRUZ-ILMD2200190/2021	BA.1.15	S:L452R
hCoV-19/USA/CA-OC-1507/2021	BA.1.1	S:L452R
hCoV-19/USA/CA-CDPH-3000283218/2021	BA.1.15	S:L452R
hCoV-19/France/IDF-HMN-21122290654/2021	BA.1.14	S:L452R
hCoV-19/USA/CA-CDPH-3000283132/2021	BA.1.16	S:L452R
hCoV-19/USA/CA-CDPH-3000288377/2021	BA.1.15	S:L452R
hCoV-19/Colombia/DC-IAVH-VG-11537/2021	BA.1.15	S:L452R
hCoV-19/India/WB-IICB-S651-12/2021	BA.1.14	S:L452R
hCoV-19/USA/MN-UMGC-28222/2021	BA.1.15	S:L452R
hCoV-19/USA/MN-UMGC-28260/2021	BA.1.1	S:L452R
hCoV-19/Thailand/NIC_BKK_SEQ23207/2021	BA.1.4	S:L452R
hCoV-19/Thailand/NIC_BKK_SEQ23230/2021	BA.1.17	S:L452R
hCoV-19/Thailand/NIC_SNI_SEQ23246/2021	BA.1.1.11	S:L452R
hCoV-19/Thailand/NIC_BKK_SEQ23232/2021	BA.1.16	S:L452R
hCoV-19/USA/MN-UMGC-28093/2021	BA.1.1.15	S:L452R
hCoV-19/USA/MN-UMGC-28493/2021	BA.1.1	S:L452R
hCoV-19/USA/MN-UMGC-28494/2021	BA.1.1.4	S:L452R
hCoV-19/USA/MN-UMGC-28463/2021	BA.1.4	S:L452R
hCoV-19/USA/MN-UMGC-28254/2021	BA.1.1	S:L452R
hCoV-19/USA/MN-UMGC-28304/2021	BA.1.15	S:L452R
hCoV-19/USA/MN-UMGC-28630/2021	BA.1.1	S:L452R
hCoV-19/USA/MN-UMGC-28325/2021	BA.1.4	S:L452R
hCoV-19/USA/MN-UMGC-28095/2021	BA.1.1	S:L452R
hCoV-19/USA/MN-UMGC-28239/2021	BA.1.1	S:L452R
hCoV-19/USA/MN-UMGC-28158/2021	BA.1.14	S:L452R
hCoV-19/USA/MN-UMGC-28206/2021	BA.1.1	S:L452R
hCoV-19/USA/MN-UMGC-28156/2021	BA.1.14	S:L452R
hCoV-19/USA/MN-UMGC-28210/2021	BA.1.1	S:L452R
hCoV-19/USA/MN-UMGC-28487/2021	BA.1.14	S:L452R
hCoV-19/USA/MN-UMGC-28308/2021	BA.1.14	S:L452R
hCoV-19/USA/MN-UMGC-28440/2021	BA.1.1	S:L452R
hCoV-19/USA/MN-UMGC-28410/2021	BA.1.1.2	S:L452R
hCoV-19/USA/MN-UMGC-28342/2021	BA.1.4	S:L452R
hCoV-19/USA/MN-UMGC-28517/2021	BA.1.1	S:L452R
hCoV-19/USA/MN-UMGC-28302/2021	BA.1.1	S:L452R
hCoV-19/USA/MN-UMGC-28247/2021	BA.1.4	S:L452R
hCoV-19/USA/MN-UMGC-28371/2021	BA.1.15	S:L452R
hCoV-19/USA/MN-UMGC-28644/2021	BA.1.15	S:L452R
hCoV-19/USA/MN-UMGC-28315/2021	BA.1.14	S:L452R
hCoV-19/USA/MN-UMGC-28485/2021	BA.1.4	S:L452R
hCoV-19/USA/MN-UMGC-28328/2021	BA.1.4	S:L452R
hCoV-19/USA/MN-UMGC-28321/2021	BA.1.4	S:L452R
hCoV-19/USA/MN-UMGC-28522/2021	BA.1.1	S:L452R
hCoV-19/USA/MN-UMGC-28603/2021	BA.1.1	S:L452R
hCoV-19/USA/MN-UMGC-28097/2021	BA.1.14	S:L452R
hCoV-19/USA/MN-UMGC-28275/2021	BA.1.15	S:L452R
hCoV-19/USA/MN-UMGC-28520/2021	BA.1.1	S:L452R
hCoV-19/USA/MN-UMGC-28381/2021	BA.1.15	S:L452R
hCoV-19/USA/MN-UMGC-28256/2021	BA.1.1	S:L452R
hCoV-19/USA/MN-UMGC-28122/2021	BA.1.14	S:L452R
hCoV-19/USA/MN-UMGC-28495/2021	BA.1.1	S:L452R
hCoV-19/USA/MN-UMGC-28358/2021	BA.1.1.1	S:L452R
hCoV-19/USA/MN-UMGC-28356/2021	BA.1.4	S:L452R
hCoV-19/USA/MN-UMGC-28279/2021	BA.1.1	S:L452R
hCoV-19/USA/MN-UMGC-28091/2021	BA.1.1.1	S:L452R
hCoV-19/USA/MN-UMGC-28514/2021	BA.1.4	S:L452R
hCoV-19/USA/MN-UMGC-28131/2021	BA.1.1.2	S:L452R
hCoV-19/USA/MN-UMGC-28454/2021	BA.1.14	S:L452R
hCoV-19/USA/MN-UMGC-28628/2021	BA.1.1	S:L452R
hCoV-19/USA/MN-UMGC-28153/2021	BA.1.1	S:L452R
hCoV-19/USA/MN-UMGC-28098/2021	BA.1.14	S:L452R
hCoV-19/USA/MN-UMGC-28398/2021	BA.1.1	S:L452R
hCoV-19/USA/MN-UMGC-28141/2021	BA.1.1.1	S:L452R
hCoV-19/USA/MN-UMGC-28309/2021	BA.1.1	S:L452R
hCoV-19/USA/MN-UMGC-28176/2021	BA.1.1.1	S:L452R
hCoV-19/USA/AZ-ASU30340/2021	BA.1.9	S:L452R
hCoV-19/USA/AZ-ASU30281/2021	BA.1.15	S:L452R
hCoV-19/Thailand/NIC_SKM_SEQ23261/2021	BA.1.1	S:L452R
hCoV-19/Thailand/NIC_BKK_SEQ23285/2021	BA.1.1.11	S:L452R
hCoV-19/Thailand/NIC_BKK_SEQ23336/2021	BA.1.15	S:L452R
hCoV-19/Thailand/NIC_AYA_SEQ23490/2021	BA.1.1.11	S:L452R
hCoV-19/Thailand/NIC_BKK_SEQ23435/2021	BA.1.17	S:L452R
hCoV-19/Thailand/NIC_BKK_SEQ23195/2021	BA.1.4	S:L452R
hCoV-19/Thailand/NIC_NBI_SEQ23507/2021	BA.1.1	S:L452R
hCoV-19/Thailand/NIC_BKK_SEQ23481/2021	BA.1.15	S:L452R
hCoV-19/Thailand/NIC_AYA_SEQ23489/2021	BA.1.1	S:L452R
hCoV-19/Thailand/NIC_NBI_SEQ23505/2021	BA.1.1.11	S:L452R
hCoV-19/Thailand/NIC_BKK_SEQ23463/2021	BA.1.1	S:L452R
hCoV-19/Thailand/NIC_BKK_SEQ23208/2021	BA.1.4	S:L452R
hCoV-19/Thailand/NIC_NBI_SEQ23445/2021	BA.1.16	S:L452R
hCoV-19/Thailand/NIC_BKK_SEQ23500/2021	BA.1.14	S:L452R
hCoV-19/Thailand/NIC_BKK_SEQ23268/2021	BA.1.14	S:L452R
hCoV-19/France/IDF-CERBAHC-12997156/2021	BA.1.14	S:L452R
hCoV-19/India/RJ-ICMR-NIV-INSACOG-C-1711840/2021	BA.1.15	S:L452R
hCoV-19/India/RJ-ICMR-NIV-INSACOG-56136944/2021	BA.1.15	S:L452R
hCoV-19/France/IDF-CERBAHC-12138985/2021	BA.1.1	S:L452R
hCoV-19/France/COR-CERBAHC-12233505/2021	BA.1	S:L452R
hCoV-19/France/COR-CERBAHC-12233296/2021	BA.1.14	S:L452R
hCoV-19/Thailand/NIC_BKK_SEQ23744/2021	BA.1.14	S:L452R
hCoV-19/Thailand/NIC_BKK_SEQ23797/2021	BA.1.15	S:L452R
hCoV-19/Thailand/NIC_CBI_SEQ23630/2021	BA.1.15	S:L452R
hCoV-19/Thailand/NIC_BKK_SEQ23675/2021	BA.1.1	S:L452R
hCoV-19/Thailand/NIC_SNI_SEQ23629/2021	BA.1.17	S:L452R
hCoV-19/Thailand/NIC_BKK_SEQ23618/2021	BA.1.1.15	S:L452R
hCoV-19/Thailand/NIC_BKK_SEQ23622/2021	BA.1.15	S:L452R
hCoV-19/Thailand/NIC_KSN_SEQ23949/2021	BA.1.1.15	S:L452R
hCoV-19/SintMaarten/SX-RIVM-78018/2021	BA.1.1	S:L452R
hCoV-19/USA/AZ-ASU30991/2021	BA.1.1	S:L452R
hCoV-19/USA/AZ-ASU30950/2021	BA.1.9	S:L452R
hCoV-19/USA/AZ-ASU31109/2022	BA.1.1	S:L452R
hCoV-19/USA/AZ-ASU31021/2022	BA.1.9	S:L452R
hCoV-19/Belgium/MBLG-CTMAPF25748052/2021	BA.1.1	S:L452R
hCoV-19/France/IDF-CERBAHC-1213499/2021	BA.1.14	S:L452R
hCoV-19/France/IDF-HMN-21122270758/2021	BA.1.13.1	S:L452R
hCoV-19/USA/CA-SJCPHL-2131324201/2021	BA.1.9	S:L452R
hCoV-19/SouthAfrica/CERI-KRISP-K033590/2021	BA.1.1.4	S:L452R
hCoV-19/USA/PA-VSP10878/2021	BA.1.15	S:L452R
hCoV-19/USA/PA-VSP10898/2021	BA.1.15	S:L452R
hCoV-19/USA/MD-IGS-52134812658A/2021	BA.1.15	S:L452R
hCoV-19/France/GES-HMN-21122300180/2021	BA.1.15	N:R203M, S:L452R
hCoV-19/France/GES-HMN-21122310505/2021	BA.1.15	S:L452R
hCoV-19/USA/AZ-ASU32374/2021	BA.1.9	M:I82T, N:R203M, S:L452R
hCoV-19/USA/AZ-ASU32406/2021	BA.1.1	S:L452R
hCoV-19/Spain/CL-COV20046/2021	BA.1.17	M:I82T, S:L452R
hCoV-19/Spain/CL-COV20067/2021	BA.1.17	S:L452R
hCoV-19/Spain/CL-COV20061/2021	BA.1.17	M:I82T, S:L452R
hCoV-19/Spain/CL-COV20211/2021	BA.1.1.1	S:L452R
hCoV-19/CzechRepublic/UMTM367025/2021	BA.1.14	S:L452R
hCoV-19/Brazil/SP-IB_145759/2021	BA.1.4	S:L452R
hCoV-19/USA/TN-3-43106-4/2021	BA.1.1	S:L452R
hCoV-19/India/MH-KasturbaMCGM-ICMR-INSACOG-WG2351/2021	BA.1.15	S:L452R
hCoV-19/Spain/RI-CIBIR-218082108-Run30/2021	BA.1	S:L452R
hCoV-19/USA/NE-CUMC_21361091/2021	BA.1.1.1	M:I82T, S:L452R
hCoV-19/USA/NE-CUMC_21361072/2022	BA.1.13.1	S:L452R
hCoV-19/USA/NE-CUMC_21361082/2021	BA.1.4	N:R203M, S:L452R
hCoV-19/USA/MN-UMGC-28636/2021	BA.1.15	S:L452R
hCoV-19/USA/DC-DFS-PHL-03857/2021	BA.1.1.4	M:I82T, N:R203M, S:L452R
hCoV-19/Thailand/NIC-BKK-SEQ23094/2021	BA.1.1.15	S:L452R
hCoV-19/USA/AZ-ASU30295/2021	BA.1.9	M:I82T, N:R203M, S:L452R
hCoV-19/Turkey/HSGM-F13741/2021	BA.1.15	M:I82T, S:L452R
hCoV-19/Slovenia/571523/2021	BA.1.15.1	N:R203M, S:L452R
hCoV-19/USA/CO-CDPHE-2102519336/2021	BA.1.15	N:R203M, S:L452R
hCoV-19/USA/SD-SDPHL-0932/2021	BA.1	M:I82T, N:R203M, S:L452R
hCoV-19/Thailand/NIC_BKK_SEQ23205/2021	BA.1.9	M:I82T, N:R203M, S:L452R
hCoV-19/Slovenia/580318/2021	BA.1.15	N:R203M, S:L452R
hCoV-19/Thailand/NIC_BKK_SEQ23231/2021	BA.1.15	M:I82T, N:R203M, S:L452R
hCoV-19/France/NOR-HMN-21122290115/2021	BA.1.1.1	S:L452R
hCoV-19/USA/IL-S22WGS0044/2021	BA.1.14	N:R203M, S:L452R
hCoV-19/Turkey/HSGM-F13887/2021	BA.1.14	S:L452R
hCoV-19/Slovenia/579487/2021	BA.1.14	N:R203M, S:L452R
hCoV-19/Turkey/HSGM-F12654/2021	BA.1.13.1	S:L452R
hCoV-19/Turkey/HSGM-F13607/2021	BA.1.1.15	M:I82T, N:R203M, S:L452R
hCoV-19/Thailand/NIC-BKK-SEQ23102/2021	BA.1.1.15	M:I82T, S:L452R
hCoV-19/Italy/ABR-IZSGC-319798/2021	BA.1.15	S:L452R
hCoV-19/Thailand/NIC_SNI_SEQ23245/2021	BA.1.15	M:I82T, N:R203M, S:L452R
hCoV-19/Turkey/HSGM-F13077/2021	BA.1.15	N:R203M, S:L452R
hCoV-19/Thailand/NIC_BKK_SEQ23306/2021	BA.1.15	N:R203M, S:L452R
hCoV-19/USA/CT-YPL21-137508/2021	BA.1.1	M:I82T, S:L452R
hCoV-19/Italy/ABR-IZSGC-320020/2021	BA.1.15	S:L452R
hCoV-19/FrenchGuiana/IPG202101613/2021	BA.1.1.1	S:L452R
hCoV-19/Turkey/HSGM-F13490/2021	BA.1.15	M:I82T, S:L452R
hCoV-19/Thailand/NIC_BKK_SEQ23586/2021	BA.1.16	M:I82T, S:L452R
hCoV-19/Turkey/HSGM-F13657/2021	BA.1.1.1	M:I82T, N:R203M, S:L452R
hCoV-19/Turkey/HSGM-F13577/2021	BA.1.15	M:I82T, S:L452R
hCoV-19/Turkey/HSGM-F13426/2021	BA.1.17	M:I82T, S:L452R
hCoV-19/India/GJ-INSACOG-GBRC3908/2021	BA.1.1	S:L452R
hCoV-19/Slovenia/579740/2021	BA.1.17	N:R203M, S:L452R
hCoV-19/Mexico/CMX-INMEGEN-47-209/2021	BA.1.16	S:L452R
hCoV-19/Thailand/NIC_BKK_SEQ23199/2021	BA.1.17	N:R203M, S:L452R
hCoV-19/Thailand/NIC_BKK_SEQ23504/2021	BA.1.15	S:L452R
hCoV-19/Thailand/NIC_BKK_SEQ23334/2021	BA.1.15	M:I82T, S:L452R
hCoV-19/Italy/ABR-IZSGC-320048/2021	BA.1.15	S:L452R
hCoV-19/USA/AZ-ASU30287/2021	BA.1.9	M:I82T, N:R203M, S:L452R
hCoV-19/Thailand/NIC-NST-SEQ23166/2021	BA.1.13	M:I82T, S:L452R
hCoV-19/USA/MN-UMGC-27078/2021	BA.1.1.1	S:L452R
hCoV-19/Turkey/HSGM-F13581/2021	BA.1.17	N:R203M, S:L452R
hCoV-19/USA/AZ-ASU30763/2021	BA.1.16	M:I82T, N:R203M, S:L452R
hCoV-19/Mexico/OAX-INMEGEN-47-200/2021	BA.1.15	S:L452R
hCoV-19/USA/PA-BOL-M21178569/2021	BA.1.9	N:R203M, S:L452R
hCoV-19/Turkey/HSGM-F13910/2021	BA.1.14	S:L452R
hCoV-19/France/IDF-CERBAHC-12224633/2021	BA.1.1.1	M:I82T, S:L452R
hCoV-19/Italy/ABR-IZSGC-320025/2021	BA.1.15	N:R203M, S:L452R
hCoV-19/Turkey/HSGM-F13410/2021	BA.1.15	M:I82T, S:L452R
hCoV-19/Thailand/NIC_BKK_SEQ23436/2021	BA.1.17	M:I82T, S:L452R
hCoV-19/Thailand/NIC_BKK_SEQ23262/2021	BA.1.15	M:I82T, S:L452R
hCoV-19/USA/UT-UPHL-220107959528/2021	BA.1.15	S:L452R
hCoV-19/France/IDF-HMN-21122291028/2021	BA.1.1.1	S:L452R
hCoV-19/Turkey/HSGM-F13641/2021	BA.1.13	S:L452R
hCoV-19/Thailand/NIC_NBI_SEQ23514/2021	BA.1.17	N:R203M, S:L452R
hCoV-19/Indonesia/BT-NIHRD-MI.22.00148/2022	BA.1.1.11	S:L452R
hCoV-19/USA/AZ-ASU30701/2021	BA.1.1.16	M:I82T, S:L452R
hCoV-19/India/GJ-INSACOG-GBRC3921/2021	BA.1.1	M:I82T, S:L452R
hCoV-19/USA/CA-CDPH-3000286777/2021	BA.1	M:I82T, S:L452R
hCoV-19/Spain/CT-HUB03274/2021	BA.1.17	M:I82T, S:L452R
hCoV-19/Thailand/NIC_BKK_SEQ23482/2021	BA.1.1	N:R203M, S:L452R
hCoV-19/Thailand/NIC-BKK-SEQ23092/2021	BA.1.1	M:I82T, N:R203M, S:L452R
hCoV-19/Turkey/HSGM-F13440/2021	BA.1.1.1	M:I82T, S:L452R
hCoV-19/Thailand/NIC_BKK_SEQ23237/2021	BA.1.15	N:R203M, S:L452R
hCoV-19/France/NOR-CERBAHC-1293854/2021	BA.1.13.1	M:I82T, N:R203M, S:L452R
hCoV-19/Thailand/NIC_BKK_SEQ23180/2021	BA.1.15	N:R203M, S:L452R
hCoV-19/Thailand/NIC_BKK_SEQ23307/2021	BA.1.15	M:I82T, N:R203M, S:L452R
hCoV-19/Malaysia/MGI_GS0546/2021	BA.1.1	S:L452R
hCoV-19/Malaysia/MGI_GS0543/2021	BA.1.15	S:L452R
hCoV-19/Malaysia/MGI_GS0521/2021	BA.1.1	S:L452R
hCoV-19/Malaysia/MGI_GS0542/2021	BA.1.1	S:L452R
hCoV-19/USA/CA-CDPH-3000284884/2021	BA.1.15	S:L452R
hCoV-19/USA/CT-JAX-JAX-2202.02-157/2021	BA.1.4	S:L452R
hCoV-19/Netherlands/ZH-RIVM-80311/2021	BA.1.1.14	S:L452R
hCoV-19/USA/OR-OHSU-213640427/2021	BA.1.1.15	M:I82T, N:R203M, S:L452R
hCoV-19/Spain/CT-LabRefCat-2645660/2021	BA.1	S:L452R
hCoV-19/Israel/ICH-741109413/2021	BA.1.14	S:L452R
hCoV-19/Israel/ICH-741109627/2021	BA.1.14	S:L452R
hCoV-19/Israel/ICH-741109569/2021	BA.1.1.15	S:L452R
hCoV-19/USA/KS-KHEL-8518/2021	BA.1.15	S:L452R
hCoV-19/USA/WA-UW-21121842189/2021	BA.1.1	S:L452R
hCoV-19/USA/WA-UW-21121863915/2021	BA.1.15	S:L452R
hCoV-19/USA/MN-UMGC-27419/2021	BA.1.1.1	S:L452R
hCoV-19/USA/MN-UMGC-27090/2021	BA.1.14	S:L452R
hCoV-19/USA/WA-CDC-UW21122029679/2021	BA.1.15	S:L452R
hCoV-19/USA/WA-CDC-UW21122156836/2021	BA.1.1	S:L452R
hCoV-19/USA/WA-CDC-UW21122168872/2021	BA.1.1	S:L452R
hCoV-19/USA/WA-CDC-UW21122169162/2021	BA.1.1	S:L452R
hCoV-19/USA/WA-CDC-UW21122008429/2021	BA.1.1	S:L452R
hCoV-19/USA/WA-CDC-UW21122122231/2021	BA.1.15	S:L452R
hCoV-19/USA/WA-CDC-UW21122105374/2021	BA.1.1.15	S:L452R
hCoV-19/USA/WA-CDC-UW21122184279/2021	BA.1.15	S:L452R
hCoV-19/USA/WA-CDC-UW21122184684/2021	BA.1.1	S:L452R
hCoV-19/USA/WA-CDC-UW21122164854/2021	BA.1.1	S:L452R
hCoV-19/USA/WA-CDC-UW21122101590/2021	BA.1.1	S:L452R
hCoV-19/USA/WA-CDC-UW21122162196/2021	BA.1.15	S:L452R
hCoV-19/USA/WA-CDC-UW21122124951/2021	BA.1.1	S:L452R
hCoV-19/USA/WA-CDC-UW21122104179/2021	BA.1.1	S:L452R
hCoV-19/USA/WA-CDC-UW21122174571/2021	BA.1.15	S:L452R
hCoV-19/Mexico/CMX_InDRE_FB54396_E09813337870_S10187/2021	BA.1.1	S:L452R
hCoV-19/USA/WA-CDC-UW21123174570/2021	BA.1.16	S:L452R
hCoV-19/USA/WA-CDC-UW22010163461/2022	BA.1.1	S:L452R
hCoV-19/USA/WA-CDC-UW21123119389/2021	BA.1.15	S:L452R
hCoV-19/USA/WA-CDC-UW21123164870/2021	BA.1.1	S:L452R
hCoV-19/USA/WA-CDC-UW21123186815/2021	BA.1.1	S:L452R
hCoV-19/USA/WY-WYPHL-21129537/2021	BA.1.1	S:L452R
hCoV-19/Turkey/HSGM-F13564/2021	BA.1.15	S:L452R
hCoV-19/Turkey/HSGM-F13513/2021	BA.1.14	S:L452R
hCoV-19/Singapore/9689/2021	BA.1.15	S:L452R
hCoV-19/Turkey/HSGM-F13470/2021	BA.1.15	S:L452R
hCoV-19/Thailand/NIC_BKK_SEQ23591/2021	BA.1.15	S:L452R
hCoV-19/Italy/ABR-IZSGC-319801/2021	BA.1.14	S:L452R
hCoV-19/Turkey/HSGM-F13557/2021	BA.1.1	S:L452R
hCoV-19/Turkey/HSGM-F13571/2021	BA.1.15	S:L452R
hCoV-19/Turkey/HSGM-F13686/2021	BA.1.15	S:L452R
hCoV-19/Turkey/HSGM-F13587/2021	BA.1.15	S:L452R
hCoV-19/Thailand/NIC_BKK_SEQ23596/2021	BA.1.16	S:L452R
hCoV-19/Morocco/IPM20386919/2021	BA.1.13.1	S:L452R
hCoV-19/Turkey/HSGM-F13682/2021	BA.1.15	S:L452R
hCoV-19/Turkey/HSGM-F13540/2021	BA.1.15	S:L452R
hCoV-19/USA/CA-CDPH-3000284896/2021	BA.1.1	S:L452R
hCoV-19/Turkey/HSGM-F13720/2021	BA.1.15	S:L452R
hCoV-19/USA/UT-UPHL-220107245177/2021	BA.1.1	S:L452R
hCoV-19/Turkey/HSGM-F13619/2021	BA.1.15	S:L452R
hCoV-19/Turkey/HSGM-F13477/2021	BA.1.15	S:L452R
hCoV-19/Scotland/QEUH-308D9CB/2021	BA.1.1	S:L452R
hCoV-19/England/QEUH-308DD0B/2021	BA.1.17	S:L452R
hCoV-19/USA/MN-UMGC-28283/2021	BA.1.4	S:L452R
hCoV-19/USA/MN-UMGC-28625/2021	BA.1.1	S:L452R
hCoV-19/USA/MN-UMGC-28226/2021	BA.1.14	S:L452R
hCoV-19/USA/MN-UMGC-28353/2021	BA.1.14	S:L452R
hCoV-19/USA/MN-UMGC-28290/2021	BA.1.14	S:L452R
hCoV-19/USA/MN-UMGC-28643/2021	BA.1.14	S:L452R
hCoV-19/USA/MN-UMGC-28460/2021	BA.1.1	S:L452R
hCoV-19/USA/MN-UMGC-28392/2021	BA.1.1	S:L452R
hCoV-19/USA/MN-UMGC-28168/2021	BA.1.1	S:L452R
hCoV-19/USA/MN-UMGC-28113/2021	BA.1.14	S:L452R
hCoV-19/USA/MN-UMGC-28499/2021	BA.1.1	S:L452R
hCoV-19/USA/MN-UMGC-28447/2021	BA.1.14	S:L452R
hCoV-19/USA/MN-UMGC-28635/2021	BA.1.1.2	S:L452R
hCoV-19/USA/MN-UMGC-28246/2021	BA.1.1	S:L452R
hCoV-19/USA/MN-UMGC-28571/2021	BA.1.1	S:L452R
hCoV-19/USA/MN-UMGC-28503/2021	BA.1.4	S:L452R
hCoV-19/USA/MN-UMGC-28227/2021	BA.1.14	S:L452R
hCoV-19/USA/MN-UMGC-28411/2021	BA.1.1	S:L452R
hCoV-19/USA/MN-UMGC-28086/2021	BA.1.15	S:L452R
hCoV-19/USA/MN-UMGC-28216/2021	BA.1.4	S:L452R
hCoV-19/USA/MN-UMGC-28498/2021	BA.1.4	S:L452R
hCoV-19/USA/MN-UMGC-28508/2021	BA.1.4	S:L452R
hCoV-19/USA/MN-UMGC-28354/2021	BA.1.4	S:L452R
hCoV-19/USA/MN-UMGC-28521/2021	BA.1.4	S:L452R
hCoV-19/USA/MN-UMGC-28149/2021	BA.1.14	S:L452R
hCoV-19/USA/MN-UMGC-28267/2021	BA.1.1	S:L452R
hCoV-19/Thailand/NIC_BKK_SEQ23556/2021	BA.1.4	S:L452R
hCoV-19/Germany/BW-RKI-I-412865/2021	BA.1.1.15	S:L452R
hCoV-19/Germany/BW-RKI-I-413153/2021	BA.1.14	S:L452R
hCoV-19/Germany/SN-RKI-I-413283/2021	BA.1.14	S:L452R
hCoV-19/Germany/BE-RKI-I-418292/2021	BA.1.1	S:L452R
hCoV-19/Germany/BE-RKI-I-418312/2021	BA.1.4	S:L452R
hCoV-19/Germany/NW-RKI-I-421372/2021	BA.1.15	S:L452R
hCoV-19/Germany/RP-RKI-I-421380/2021	BA.1.15	S:L452R
hCoV-19/Germany/NW-RKI-I-425053/2021	BA.1.1	S:L452R
hCoV-19/Germany/NW-RKI-I-425614/2021	BA.1.1.1	S:L452R
hCoV-19/Germany/NW-RKI-I-425661/2021	BA.1.1.1	S:L452R
hCoV-19/Germany/BW-RKI-I-426929/2021	BA.1.14	S:L452R
hCoV-19/Germany/BW-RKI-I-433218/2021	BA.1.17	S:L452R
hCoV-19/Germany/NW-RKI-I-435205/2021	BA.1.17	S:L452R
hCoV-19/Germany/BW-RKI-I-435646/2021	BA.1.2	S:L452R
hCoV-19/Sweden/2000928264/2021	BA.1.10	S:L452R
hCoV-19/Turkey/HSGM-F13510/2021	BA.1.15	S:L452R
hCoV-19/Morocco/IPM20386918/2021	BA.1.13.1	S:L452R
hCoV-19/England/LSPA-3061A8E/2021	BA.1.17	S:L452R
hCoV-19/England/PHEC-4G0A2ZC1/2021	BA.1.17	S:L452R
hCoV-19/Scotland/QEUH-306EFEC/2021	BA.1.1	S:L452R
hCoV-19/USA/TX-CDC-LC0443736/2021	BA.1.1.2	S:L452R
hCoV-19/Turkey/HSGM-F13621/2021	BA.1.15	S:L452R
hCoV-19/Turkey/HSGM-F13528/2021	BA.1.17	S:L452R
hCoV-19/Turkey/HSGM-F13734/2021	BA.1.15	S:L452R
hCoV-19/Morocco/IPM20386910/2021	BA.1.13.1	S:L452R
hCoV-19/Turkey/HSGM-F13609/2021	BA.1.15	S:L452R
hCoV-19/England/PHEP-YYDF4Q7/2021	BA.1.17	S:L452R
hCoV-19/Romania/B-38593/2021	BA.1.17	S:L452R
hCoV-19/USA/TX-HMH-MCoV-69834/2021	BA.1.15	S:L452R
hCoV-19/USA/TX-HMH-MCoV-69837/2021	BA.1.1	S:L452R
hCoV-19/USA/TX-HMH-MCoV-69812/2021	BA.1.15	S:L452R
hCoV-19/USA/TX-HMH-MCoV-69825/2021	BA.1.1	S:L452R
hCoV-19/USA/TX-HMH-MCoV-69821/2021	BA.1.15	S:L452R
hCoV-19/USA/TX-HMH-MCoV-69817/2021	BA.1.15	S:L452R
hCoV-19/USA/TX-HMH-MCoV-69819/2021	BA.1.15	S:L452R
hCoV-19/USA/TX-HMH-MCoV-69823/2021	BA.1.15	S:L452R
hCoV-19/USA/TX-HMH-MCoV-69826/2021	BA.1.15	S:L452R
hCoV-19/USA/TX-HMH-MCoV-69787/2021	BA.1.15	S:L452R
hCoV-19/USA/TX-HMH-MCoV-69792/2021	BA.1.15	S:L452R
hCoV-19/USA/TX-HMH-MCoV-69791/2021	BA.1.15	S:L452R
hCoV-19/USA/TX-HMH-MCoV-69785/2021	BA.1.15	S:L452R
hCoV-19/USA/TX-HMH-MCoV-69686/2021	BA.1.15	S:L452R
hCoV-19/USA/TX-HMH-MCoV-69766/2021	BA.1.15	S:L452R
hCoV-19/USA/TX-HMH-MCoV-69758/2021	BA.1.15	S:L452R
hCoV-19/USA/TX-HMH-MCoV-69775/2021	BA.1.15	S:L452R
hCoV-19/USA/TX-HMH-MCoV-69748/2021	BA.1.15	S:L452R
hCoV-19/USA/TX-HMH-MCoV-69757/2021	BA.1.15	S:L452R
hCoV-19/USA/TX-HMH-MCoV-69756/2021	BA.1.15	S:L452R
hCoV-19/USA/TX-HMH-MCoV-69762/2021	BA.1.15	S:L452R
hCoV-19/USA/TX-HMH-MCoV-70014/2021	BA.1.1.15	S:L452R
hCoV-19/USA/TX-HMH-MCoV-70005/2021	BA.1.15	S:L452R
hCoV-19/USA/TX-HMH-MCoV-70018/2021	BA.1.15	S:L452R
hCoV-19/USA/TX-HMH-MCoV-69999/2021	BA.1.15	S:L452R
hCoV-19/USA/TX-HMH-MCoV-70019/2021	BA.1.15	S:L452R
hCoV-19/USA/TX-HMH-MCoV-70020/2021	BA.1.15	S:L452R
hCoV-19/USA/TX-HMH-MCoV-70022/2021	BA.1.15	S:L452R
hCoV-19/USA/TX-HMH-MCoV-70027/2021	BA.1.15	S:L452R
hCoV-19/USA/TX-HMH-MCoV-69998/2021	BA.1.15	S:L452R
hCoV-19/USA/TX-HMH-MCoV-69977/2021	BA.1.15	S:L452R
hCoV-19/USA/TX-HMH-MCoV-69990/2021	BA.1.15	S:L452R
hCoV-19/USA/TX-HMH-MCoV-69979/2021	BA.1.15	S:L452R
hCoV-19/USA/TX-HMH-MCoV-69947/2021	BA.1.15	S:L452R
hCoV-19/USA/TX-HMH-MCoV-69994/2021	BA.1.15	S:L452R
hCoV-19/USA/TX-HMH-MCoV-69970/2021	BA.1.15	S:L452R
hCoV-19/USA/TX-HMH-MCoV-69963/2021	BA.1.15	S:L452R
hCoV-19/USA/TX-HMH-MCoV-69975/2021	BA.1.15	S:L452R
hCoV-19/USA/TX-HMH-MCoV-69964/2021	BA.1.15	S:L452R
hCoV-19/USA/TX-HMH-MCoV-69965/2021	BA.1.1.1	S:L452R
hCoV-19/USA/TX-HMH-MCoV-69945/2021	BA.1.15	S:L452R
hCoV-19/USA/TX-HMH-MCoV-69968/2021	BA.1.15	S:L452R
hCoV-19/USA/TX-HMH-MCoV-69959/2021	BA.1.15	S:L452R
hCoV-19/USA/TX-HMH-MCoV-69960/2021	BA.1.15	S:L452R
hCoV-19/USA/TX-HMH-MCoV-69952/2021	BA.1.15	S:L452R
hCoV-19/USA/TX-HMH-MCoV-69954/2021	BA.1.15	S:L452R
hCoV-19/USA/TX-HMH-MCoV-69957/2021	BA.1.15	S:L452R
hCoV-19/USA/TX-HMH-MCoV-69958/2021	BA.1.15	S:L452R
hCoV-19/USA/TX-HMH-MCoV-69895/2021	BA.1.15	S:L452R
hCoV-19/USA/TX-HMH-MCoV-69881/2021	BA.1.15	S:L452R
hCoV-19/USA/TX-HMH-MCoV-69870/2021	BA.1.15	M:I82T, N:R203M, S:L452R
hCoV-19/USA/TX-HMH-MCoV-69915/2021	BA.1.15	S:L452R
hCoV-19/USA/TX-HMH-MCoV-69853/2021	BA.1.15	S:L452R
hCoV-19/USA/TX-HMH-MCoV-69916/2021	BA.1.15	S:L452R
hCoV-19/USA/TX-HMH-MCoV-69917/2021	BA.1.15	S:L452R
hCoV-19/USA/TX-HMH-MCoV-70053/2021	BA.1.15	S:L452R
hCoV-19/USA/TX-HMH-MCoV-70047/2021	BA.1.15	S:L452R
hCoV-19/USA/TX-HMH-MCoV-70051/2021	BA.1.15	S:L452R
hCoV-19/USA/TX-HMH-MCoV-69930/2021	BA.1.1	S:L452R
hCoV-19/USA/TX-HMH-MCoV-69906/2021	BA.1.15	S:L452R
hCoV-19/USA/TX-HMH-MCoV-70049/2021	BA.1.15	S:L452R
hCoV-19/USA/TX-HMH-MCoV-70050/2021	BA.1.15	S:L452R
hCoV-19/USA/TX-HMH-MCoV-69929/2021	BA.1.15	S:L452R
hCoV-19/USA/TX-HMH-MCoV-70042/2021	BA.1.15	S:L452R
hCoV-19/USA/TX-HMH-MCoV-70043/2021	BA.1.15	S:L452R
hCoV-19/USA/TX-HMH-MCoV-70045/2021	BA.1.15	S:L452R
hCoV-19/USA/TX-HMH-MCoV-69939/2021	BA.1.15	S:L452R
hCoV-19/USA/TX-HMH-MCoV-69919/2021	BA.1.15	S:L452R
hCoV-19/USA/TX-HMH-MCoV-69920/2021	BA.1.15	S:L452R
hCoV-19/USA/TX-HMH-MCoV-69922/2021	BA.1.15	S:L452R
hCoV-19/USA/TX-HMH-MCoV-69866/2021	BA.1.15	S:L452R
hCoV-19/USA/TX-HMH-MCoV-69840/2021	BA.1.15	S:L452R
hCoV-19/USA/TX-HMH-MCoV-69858/2021	BA.1.15	S:L452R
hCoV-19/USA/TX-HMH-MCoV-69860/2021	BA.1.15	S:L452R
hCoV-19/USA/TX-HMH-MCoV-70126/2021	BA.1.15	S:L452R
hCoV-19/USA/TX-HMH-MCoV-69850/2021	BA.1.15	S:L452R
hCoV-19/USA/TX-HMH-MCoV-69885/2021	BA.1.15	S:L452R
hCoV-19/USA/TX-HMH-MCoV-69888/2021	BA.1.15	S:L452R
hCoV-19/USA/TX-HMH-MCoV-70130/2021	BA.1.15	S:L452R
hCoV-19/USA/TX-HMH-MCoV-69892/2021	BA.1.15	S:L452R
hCoV-19/USA/TX-HMH-MCoV-69877/2021	BA.1.15	S:L452R
hCoV-19/USA/TX-HMH-MCoV-70101/2021	BA.1.15	S:L452R
hCoV-19/USA/TX-HMH-MCoV-70100/2021	BA.1.15	S:L452R
hCoV-19/USA/TX-HMH-MCoV-70107/2021	BA.1.15	S:L452R
hCoV-19/USA/TX-HMH-MCoV-70105/2021	BA.1.15	S:L452R
hCoV-19/USA/TX-HMH-MCoV-69586/2021	BA.1.15	S:L452R
hCoV-19/USA/TX-HMH-MCoV-70108/2021	BA.1.15	S:L452R
hCoV-19/USA/TX-HMH-MCoV-70134/2021	BA.1.15	S:L452R
hCoV-19/USA/TX-HMH-MCoV-70129/2021	BA.1.15	S:L452R
hCoV-19/USA/TX-HMH-MCoV-70119/2021	BA.1.15	S:L452R
hCoV-19/USA/TX-HMH-MCoV-69574/2021	BA.1.15	S:L452R
hCoV-19/USA/TX-HMH-MCoV-70120/2021	BA.1.15	S:L452R
hCoV-19/USA/TX-HMH-MCoV-70099/2021	BA.1.15	S:L452R
hCoV-19/USA/TX-HMH-MCoV-69602/2021	BA.1.15	S:L452R
hCoV-19/USA/TX-HMH-MCoV-70118/2021	BA.1.15	S:L452R
hCoV-19/USA/TX-HMH-MCoV-70111/2021	BA.1.15	S:L452R
hCoV-19/USA/TX-HMH-MCoV-70112/2021	BA.1.1	S:L452R
hCoV-19/USA/TX-HMH-MCoV-70114/2021	BA.1.1	S:L452R
hCoV-19/USA/TX-HMH-MCoV-70065/2021	BA.1.15	S:L452R
hCoV-19/USA/TX-HMH-MCoV-70060/2021	BA.1.15	S:L452R
hCoV-19/USA/TX-HMH-MCoV-70078/2021	BA.1.15	S:L452R
hCoV-19/USA/TX-HMH-MCoV-70079/2021	BA.1.15	S:L452R
hCoV-19/USA/TX-HMH-MCoV-70058/2021	BA.1.15	S:L452R
hCoV-19/USA/TX-HMH-MCoV-70057/2021	BA.1.15	S:L452R
hCoV-19/USA/TX-HMH-MCoV-70081/2021	BA.1.15	S:L452R
hCoV-19/USA/TX-HMH-MCoV-70061/2021	BA.1.15	S:L452R
hCoV-19/USA/TX-HMH-MCoV-70083/2021	BA.1.15	S:L452R
hCoV-19/USA/TX-HMH-MCoV-70063/2021	BA.1.15	S:L452R
hCoV-19/USA/TX-HMH-MCoV-70085/2021	BA.1.15	S:L452R
hCoV-19/USA/TX-HMH-MCoV-70086/2021	BA.1.1	S:L452R
hCoV-19/USA/TX-HMH-MCoV-70066/2021	BA.1.15	S:L452R
hCoV-19/USA/TX-HMH-MCoV-70055/2021	BA.1.15	S:L452R
hCoV-19/USA/TX-HMH-MCoV-70067/2021	BA.1.15	S:L452R
hCoV-19/USA/TX-HMH-MCoV-70089/2021	BA.1.15	S:L452R
hCoV-19/USA/TX-HMH-MCoV-70068/2021	BA.1.15	S:L452R
hCoV-19/USA/TX-HMH-MCoV-70091/2021	BA.1.15	S:L452R
hCoV-19/USA/TX-HMH-MCoV-70093/2021	BA.1.15	S:L452R
hCoV-19/USA/TX-HMH-MCoV-70071/2021	BA.1.15	S:L452R
hCoV-19/USA/TX-HMH-MCoV-70073/2021	BA.1.15	S:L452R
hCoV-19/USA/TX-HMH-MCoV-70074/2021	BA.1.15	S:L452R
hCoV-19/USA/TX-HMH-MCoV-70096/2021	BA.1.15	S:L452R
hCoV-19/USA/TX-HMH-MCoV-70077/2021	BA.1.15	S:L452R
hCoV-19/Wales/PHWC-PGPQOZ/2021	BA.1.17	S:L452R
hCoV-19/England/LSPA-30A0DC6/2021	BA.1.1.13	S:L452R
hCoV-19/England/LSPA-30A0D8A/2021	BA.1	S:L452R
hCoV-19/Scotland/QEUH-309BC0D/2021	BA.1.9	S:L452R
hCoV-19/England/LSPA-309781C/2021	BA.1.17	S:L452R
hCoV-19/Poland/90SNR22_wsserze/2021	BA.3	S:L452R
hCoV-19/Poland/89SNR22_wsserze/2021	BA.3	S:L452R
hCoV-19/Turkey/HSGM-F13469/2021	BA.1.15	S:L452R
hCoV-19/Turkey/HSGM-F13526/2021	BA.1.1.1	S:L452R
hCoV-19/Wales/PHWC-PGUJCA/2021	BA.1.17	S:L452R
hCoV-19/Wales/PHWC-PGUPDG/2021	BA.1.17	S:L452R
hCoV-19/Wales/PHWC-PGUPXQ/2021	BA.1	S:L452R
hCoV-19/USA/WA-CDC-UW21122783933/2021	BA.1.1	S:L452R
hCoV-19/Turkey/HSGM-F13556/2021	BA.1.1	S:L452R
hCoV-19/Turkey/HSGM-F13594/2021	BA.1.15	S:L452R
hCoV-19/Turkey/HSGM-F13475/2021	BA.1.15	S:L452R
hCoV-19/Turkey/HSGM-F13403/2021	BA.1.15	S:L452R
hCoV-19/Turkey/HSGM-F13586/2021	BA.1.15	S:L452R
hCoV-19/Turkey/HSGM-F13595/2021	BA.1.15	S:L452R
hCoV-19/USA/WA-UW-21121813155/2021	BA.1.14	S:L452R
hCoV-19/CzechRepublic/CSQ4494/2021	BA.1.17	S:L452R
hCoV-19/England/NORT-YBFKZH/2021	BA.1.9	S:L452R
hCoV-19/England/NORT-YBR5T3/2021	BA.1.16	S:L452R
hCoV-19/Wales/PHWC-PGX9BB/2021	BA.1.15	S:L452R
hCoV-19/England/NORW-310AD52/2021	BA.1.14	S:L452R
hCoV-19/Morocco/IPM20386510/2021	BA.1.13.1	S:L452R
hCoV-19/Morocco/IPM20386345/2021	BA.1.13.1	S:L452R
hCoV-19/Morocco/IPM20386486/2021	BA.1.13.1	S:L452R
hCoV-19/Wales/PHWC-PGWKNJ/2021	BA.1.17	S:L452R
hCoV-19/Spain/GA-SCQ_21-726488/2021	BA.1.15	N:R203M, S:L452R
hCoV-19/Spain/GA-SCQ_21-728832/2021	BA.1.15	S:L452R
hCoV-19/Spain/GA-SCQ_21-728921/2021	BA.1.17	S:L452R
hCoV-19/England/ALDP-30DC392/2021	BA.1.17	S:L452R
hCoV-19/Switzerland/SO-ETHZ-35519043/2021	BA.1.1.15	S:L452R
hCoV-19/Switzerland/BE-IFIK-211227-os-09/2021	BA.1.14	S:L452R
hCoV-19/Switzerland/BE-IFIK-211227-os-49/2021	BA.1.1.11	S:L452R
hCoV-19/Switzerland/BE-IFIK-211227-os-15/2021	BA.1.10	S:L452R
hCoV-19/Switzerland/BE-IFIK-220103-os-06/2021	BA.1.16	S:L452R
hCoV-19/Switzerland/BE-IFIK-211227-os-40/2021	BA.1.1	S:L452R
hCoV-19/Switzerland/BE-IFIK-211227-os-19/2021	BA.1.17	S:L452R
hCoV-19/Switzerland/BE-IFIK-211227-os-85/2021	BA.1.1.11	S:L452R
hCoV-19/Switzerland/BE-IFIK-211227-os-21/2021	BA.1.17	S:L452R
hCoV-19/Switzerland/BE-IFIK-211227-os-11/2021	BA.1.14	S:L452R
hCoV-19/Switzerland/BE-IFIK-211227-os-65/2021	BA.1.14	S:L452R
hCoV-19/Switzerland/BE-IFIK-211227-os-67/2021	BA.1.17	S:L452R
hCoV-19/Switzerland/BE-IFIK-211227-os-69/2021	BA.1.1.11	S:L452R
hCoV-19/Switzerland/BE-IFIK-211227-os-44/2021	BA.1.1	S:L452R
hCoV-19/Switzerland/BE-IFIK-211227-os-14/2021	BA.1.1.3	S:L452R
hCoV-19/Switzerland/BE-IFIK-211227-os-57/2021	BA.1.1	S:L452R
hCoV-19/Wales/PHWC-PGOII9/2021	BA.1.17	S:L452R
hCoV-19/Denmark/DCGC-290789/2021	BA.1.17	S:L452R
hCoV-19/Denmark/DCGC-291762/2021	BA.1.14	S:L452R
hCoV-19/USA/IL-CDC-ASC210639515/2021	BA.1.1	S:L452R
hCoV-19/USA/TX-CDC-ASC210639547/2021	BA.1.15	S:L452R
hCoV-19/USA/NM-CDC-ASC210640863/2021	BA.1.1	S:L452R
hCoV-19/Denmark/DCGC-293480/2021	BA.1.4	S:L452R
hCoV-19/USA/NJ-CDC-IBX131712963885/2021	BA.1.1	S:L452R
hCoV-19/USA/AZ-TG1146082/2021	BA.1.15	S:L452R
hCoV-19/USA/NJ-CDC-IBX523178109978/2021	BA.1.15	S:L452R
hCoV-19/USA/NJ-CDC-IBX188554928144/2021	BA.1.1	S:L452R
hCoV-19/Colombia/DC-IAVH-VG-11558/2021	BA.1.1.14	S:L452R
hCoV-19/USA/CA-CDC-LC0442381/2021	BA.1.15	S:L452R
hCoV-19/USA/MD-CDC-LC0437818/2021	BA.1.17	S:L452R
hCoV-19/USA/VA-CDC-LC0438150/2021	BA.1.17	S:L452R
hCoV-19/USA/AZ-TG1140095/2021	BA.1.1.1	S:L452R
hCoV-19/USA/AZ-TG1140041/2021	BA.1.1.1	S:L452R
hCoV-19/USA/AZ-TG1140101/2021	BA.1.15	S:L452R
hCoV-19/USA/AZ-TG1140100/2021	BA.1.1	S:L452R
hCoV-19/USA/AZ-TG1140042/2021	BA.1.1.1	S:L452R
hCoV-19/USA/AZ-TG1140119/2021	BA.1	S:L452R
hCoV-19/USA/AZ-TG1140112/2021	BA.1.1.16	S:L452R
hCoV-19/USA/AZ-TG1140053/2021	BA.1.1.1	S:L452R
hCoV-19/USA/AZ-TG1140049/2021	BA.1.1.1	S:L452R
hCoV-19/USA/AZ-TG1140044/2021	BA.1.1	S:L452R
hCoV-19/USA/AZ-TG1140046/2021	BA.1.14	S:L452R
hCoV-19/USA/AZ-TG1140149/2021	BA.1.1	S:L452R
hCoV-19/USA/AZ-TG1140096/2021	BA.1.1	S:L452R
hCoV-19/USA/AZ-TG1140045/2021	BA.1.15	S:L452R
hCoV-19/USA/AZ-TG1140043/2021	BA.1.9	S:L452R
hCoV-19/USA/AZ-TG1140184/2021	BA.1	S:L452R
hCoV-19/USA/AZ-TG1133194/2021	BA.1.1	S:L452R
hCoV-19/USA/AZ-TG1133030/2021	BA.1.1	S:L452R
hCoV-19/USA/AZ-TG1133180/2021	BA.1.1	S:L452R
hCoV-19/USA/AZ-TG1140078/2021	BA.1.1	S:L452R
hCoV-19/USA/AZ-TG1140168/2021	BA.1.1	S:L452R
hCoV-19/USA/AZ-TG1140079/2021	BA.1.1	S:L452R
hCoV-19/USA/AZ-TG1140072/2021	BA.1.1.11	S:L452R
hCoV-19/USA/AZ-TG1140118/2021	BA.1.1	S:L452R
hCoV-19/USA/AZ-TG1140051/2021	BA.1.1	S:L452R
hCoV-19/USA/AZ-TG1140075/2021	BA.1.1	S:L452R
hCoV-19/USA/AZ-TG1140074/2021	BA.1.1	S:L452R
hCoV-19/USA/AZ-TG1140108/2021	BA.1.1	S:L452R
hCoV-19/USA/AZ-TG1140052/2021	BA.1.1	S:L452R
hCoV-19/USA/AZ-TG1140201/2021	BA.1.1	S:L452R
hCoV-19/USA/AZ-TG1140153/2021	BA.1.1	S:L452R
hCoV-19/USA/AZ-TG1140152/2021	BA.1.15	S:L452R
hCoV-19/USA/AZ-TG1140105/2021	BA.1.1	S:L452R
hCoV-19/USA/AZ-TG1140047/2021	BA.1.1	S:L452R
hCoV-19/USA/AZ-TG1140155/2021	BA.1	S:L452R
hCoV-19/USA/AZ-TG1140048/2021	BA.1.1	S:L452R
hCoV-19/USA/AZ-TG1140197/2021	BA.1.1	S:L452R
hCoV-19/USA/AZ-TG1140204/2021	BA.1.1	S:L452R
hCoV-19/USA/AZ-TG1140235/2021	BA.1.15	S:L452R
hCoV-19/USA/AZ-TG1140359/2021	BA.1.1	S:L452R
hCoV-19/USA/AZ-TG1140268/2021	BA.1.1	S:L452R
hCoV-19/USA/MN-UMGC-28088/2021	BA.1.1	S:L452R
hCoV-19/USA/MN-UMGC-28263/2021	BA.1.1	S:L452R
hCoV-19/USA/MN-UMGC-28292/2021	BA.1.4	S:L452R
hCoV-19/USA/MN-UMGC-28241/2021	BA.1.1	S:L452R
hCoV-19/USA/MN-UMGC-28421/2021	BA.1.1	S:L452R
[truncated: 9,006 more rows]
