# Supplementary material for: Genomic Variability of SARS-CoV-2 Omicron Variant Circulating in the Russian Federation during Early December 2021 and Late January 2022
Source: Pathogens. 2022 Dec 2;11(12):1461. doi: 10.3390/pathogens11121461 (PMC9786029; doi:10.3390/pathogens11121461)
Supplement: Supplementary file 1 [file pathogens-11-01461-s001.zip › TableS7.xlsx]

## Sheet: Submissions
Meta data and information about genomes uploaded to GISAID database.
Submitter	FASTA filename	Virus name	Type	Passage details/history	Collection date	Location	Host	Gender	Patient age	Patient status	Sequencing technology	Assembly method	Coverage	Originating lab	Sample ID given by originating laboratory	Submitting lab	Address	Sample ID given by the submitting laboratory
123333	csp_omicron.fasta	hCoV-19/Russia/MOW-CSP-LQ-21538_S277/2022	betacoronavirus	Original	2022-01-16	Europe/Russia/Moscow/Moscow	Human	unknown	unknown	unknown	Illumina NextSeq	bwa mapping + consensus		Chief Federal State Budgetary Healthcare Institution “Centre of Hygiene and Epidemiology” of the Federal Medical Biological Agency, Central laboratory of microbiological and clinical diagnostic tests		Federal State Budgetary Institution “Centre for Strategic Planning and Management of Biomedical Health Risks” of the Federal Medical Biological Agency, Laboratory for advanced molecular diagnostics of human diseases.	119121, Moscow, Russia, Pogodinskaya str. 10	LQ-21538_S277/2022
123333	csp_omicron.fasta	hCoV-19/Russia/MOW-CSP-LQ-21543_S278/2022	betacoronavirus	Original	2022-01-17	Europe/Russia/Moscow/Moscow	Human	unknown	unknown	unknown	Illumina NextSeq	bwa mapping + consensus		Chief Federal State Budgetary Healthcare Institution “Centre of Hygiene and Epidemiology” of the Federal Medical Biological Agency, Central laboratory of microbiological and clinical diagnostic tests		Federal State Budgetary Institution “Centre for Strategic Planning and Management of Biomedical Health Risks” of the Federal Medical Biological Agency, Laboratory for advanced molecular diagnostics of human diseases.	119121, Moscow, Russia, Pogodinskaya str. 10	LQ-21543_S278/2022
123333	csp_omicron.fasta	hCoV-19/Russia/MOW-CSP-LQ-21577_S204/2022	betacoronavirus	Original	2022-01-17	Europe/Russia/Moscow/Moscow	Human	unknown	unknown	unknown	Illumina NextSeq	bwa mapping + consensus		Chief Federal State Budgetary Healthcare Institution “Centre of Hygiene and Epidemiology” of the Federal Medical Biological Agency, Central laboratory of microbiological and clinical diagnostic tests		Federal State Budgetary Institution “Centre for Strategic Planning and Management of Biomedical Health Risks” of the Federal Medical Biological Agency, Laboratory for advanced molecular diagnostics of human diseases.	119121, Moscow, Russia, Pogodinskaya str. 10	LQ-21577_S204/2022
123333	csp_omicron.fasta	hCoV-19/Russia/MOW-CSP-LQ-21578_S205/2022	betacoronavirus	Original	2022-01-17	Europe/Russia/Moscow/Moscow	Human	unknown	unknown	unknown	Illumina NextSeq	bwa mapping + consensus		Chief Federal State Budgetary Healthcare Institution “Centre of Hygiene and Epidemiology” of the Federal Medical Biological Agency, Central laboratory of microbiological and clinical diagnostic tests		Federal State Budgetary Institution “Centre for Strategic Planning and Management of Biomedical Health Risks” of the Federal Medical Biological Agency, Laboratory for advanced molecular diagnostics of human diseases.	119121, Moscow, Russia, Pogodinskaya str. 10	LQ-21578_S205/2022
123333	csp_omicron.fasta	hCoV-19/Russia/MOW-CSP-LQ-21753_S184/2022	betacoronavirus	Original	2022-01-18	Europe/Russia/Moscow/Moscow	Human	unknown	unknown	unknown	Illumina NextSeq	bwa mapping + consensus		Chief Federal State Budgetary Healthcare Institution “Centre of Hygiene and Epidemiology” of the Federal Medical Biological Agency, Central laboratory of microbiological and clinical diagnostic tests		Federal State Budgetary Institution “Centre for Strategic Planning and Management of Biomedical Health Risks” of the Federal Medical Biological Agency, Laboratory for advanced molecular diagnostics of human diseases.	119121, Moscow, Russia, Pogodinskaya str. 10	LQ-21753_S184/2022
123333	csp_omicron.fasta	hCoV-19/Russia/MOW-CSP-LQ-21754_S185/2022	betacoronavirus	Original	2022-01-18	Europe/Russia/Moscow/Moscow	Human	unknown	unknown	unknown	Illumina NextSeq	bwa mapping + consensus		Chief Federal State Budgetary Healthcare Institution “Centre of Hygiene and Epidemiology” of the Federal Medical Biological Agency, Central laboratory of microbiological and clinical diagnostic tests		Federal State Budgetary Institution “Centre for Strategic Planning and Management of Biomedical Health Risks” of the Federal Medical Biological Agency, Laboratory for advanced molecular diagnostics of human diseases.	119121, Moscow, Russia, Pogodinskaya str. 10	LQ-21754_S185/2022
123333	csp_omicron.fasta	hCoV-19/Russia/MOW-CSP-LQ-21760_S1/2022	betacoronavirus	Original	2022-01-18	Europe/Russia/Moscow/Moscow	Human	unknown	unknown	unknown	Illumina NextSeq	bwa mapping + consensus		Chief Federal State Budgetary Healthcare Institution “Centre of Hygiene and Epidemiology” of the Federal Medical Biological Agency, Central laboratory of microbiological and clinical diagnostic tests		Federal State Budgetary Institution “Centre for Strategic Planning and Management of Biomedical Health Risks” of the Federal Medical Biological Agency, Laboratory for advanced molecular diagnostics of human diseases.	119121, Moscow, Russia, Pogodinskaya str. 10	LQ-21760_S1/2022
123333	csp_omicron.fasta	hCoV-19/Russia/MOW-CSP-LQ-21767_S186/2022	betacoronavirus	Original	2022-01-18	Europe/Russia/Moscow/Moscow	Human	unknown	unknown	unknown	Illumina NextSeq	bwa mapping + consensus		Chief Federal State Budgetary Healthcare Institution “Centre of Hygiene and Epidemiology” of the Federal Medical Biological Agency, Central laboratory of microbiological and clinical diagnostic tests		Federal State Budgetary Institution “Centre for Strategic Planning and Management of Biomedical Health Risks” of the Federal Medical Biological Agency, Laboratory for advanced molecular diagnostics of human diseases.	119121, Moscow, Russia, Pogodinskaya str. 10	LQ-21767_S186/2022
123333	csp_omicron.fasta	hCoV-19/Russia/MOW-CSP-LQ-21768_S187/2022	betacoronavirus	Original	2022-01-18	Europe/Russia/Moscow/Moscow	Human	unknown	unknown	unknown	Illumina NextSeq	bwa mapping + consensus		Chief Federal State Budgetary Healthcare Institution “Centre of Hygiene and Epidemiology” of the Federal Medical Biological Agency, Central laboratory of microbiological and clinical diagnostic tests		Federal State Budgetary Institution “Centre for Strategic Planning and Management of Biomedical Health Risks” of the Federal Medical Biological Agency, Laboratory for advanced molecular diagnostics of human diseases.	119121, Moscow, Russia, Pogodinskaya str. 10	LQ-21768_S187/2022
123333	csp_omicron.fasta	hCoV-19/Russia/MOW-CSP-LQ-21804_S3/2022	betacoronavirus	Original	2022-01-18	Europe/Russia/Moscow/Moscow	Human	unknown	unknown	unknown	Illumina NextSeq	bwa mapping + consensus		Chief Federal State Budgetary Healthcare Institution “Centre of Hygiene and Epidemiology” of the Federal Medical Biological Agency, Central laboratory of microbiological and clinical diagnostic tests		Federal State Budgetary Institution “Centre for Strategic Planning and Management of Biomedical Health Risks” of the Federal Medical Biological Agency, Laboratory for advanced molecular diagnostics of human diseases.	119121, Moscow, Russia, Pogodinskaya str. 10	LQ-21804_S3/2022
123333	csp_omicron.fasta	hCoV-19/Russia/MOW-CSP-LQ-21811_S188/2022	betacoronavirus	Original	2022-01-18	Europe/Russia/Moscow/Moscow	Human	unknown	unknown	unknown	Illumina NextSeq	bwa mapping + consensus		Chief Federal State Budgetary Healthcare Institution “Centre of Hygiene and Epidemiology” of the Federal Medical Biological Agency, Central laboratory of microbiological and clinical diagnostic tests		Federal State Budgetary Institution “Centre for Strategic Planning and Management of Biomedical Health Risks” of the Federal Medical Biological Agency, Laboratory for advanced molecular diagnostics of human diseases.	119121, Moscow, Russia, Pogodinskaya str. 10	LQ-21811_S188/2022
123333	csp_omicron.fasta	hCoV-19/Russia/MOW-CSP-LQ-21858_S189/2022	betacoronavirus	Original	2022-01-19	Europe/Russia/Moscow/Moscow	Human	unknown	unknown	unknown	Illumina NextSeq	bwa mapping + consensus		Chief Federal State Budgetary Healthcare Institution “Centre of Hygiene and Epidemiology” of the Federal Medical Biological Agency, Central laboratory of microbiological and clinical diagnostic tests		Federal State Budgetary Institution “Centre for Strategic Planning and Management of Biomedical Health Risks” of the Federal Medical Biological Agency, Laboratory for advanced molecular diagnostics of human diseases.	119121, Moscow, Russia, Pogodinskaya str. 10	LQ-21858_S189/2022
123333	csp_omicron.fasta	hCoV-19/Russia/MOW-CSP-LQ-21863_S190/2022	betacoronavirus	Original	2022-01-19	Europe/Russia/Moscow/Moscow	Human	unknown	unknown	unknown	Illumina NextSeq	bwa mapping + consensus		Chief Federal State Budgetary Healthcare Institution “Centre of Hygiene and Epidemiology” of the Federal Medical Biological Agency, Central laboratory of microbiological and clinical diagnostic tests		Federal State Budgetary Institution “Centre for Strategic Planning and Management of Biomedical Health Risks” of the Federal Medical Biological Agency, Laboratory for advanced molecular diagnostics of human diseases.	119121, Moscow, Russia, Pogodinskaya str. 10	LQ-21863_S190/2022
123333	csp_omicron.fasta	hCoV-19/Russia/MOW-CSP-LQ-21865_S6/2022	betacoronavirus	Original	2022-01-19	Europe/Russia/Moscow/Moscow	Human	unknown	unknown	unknown	Illumina NextSeq	bwa mapping + consensus		Chief Federal State Budgetary Healthcare Institution “Centre of Hygiene and Epidemiology” of the Federal Medical Biological Agency, Central laboratory of microbiological and clinical diagnostic tests		Federal State Budgetary Institution “Centre for Strategic Planning and Management of Biomedical Health Risks” of the Federal Medical Biological Agency, Laboratory for advanced molecular diagnostics of human diseases.	119121, Moscow, Russia, Pogodinskaya str. 10	LQ-21865_S6/2022
123333	csp_omicron.fasta	hCoV-19/Russia/MOW-CSP-LQ-21868_S8/2022	betacoronavirus	Original	2022-01-19	Europe/Russia/Moscow/Moscow	Human	unknown	unknown	unknown	Illumina NextSeq	bwa mapping + consensus		Chief Federal State Budgetary Healthcare Institution “Centre of Hygiene and Epidemiology” of the Federal Medical Biological Agency, Central laboratory of microbiological and clinical diagnostic tests		Federal State Budgetary Institution “Centre for Strategic Planning and Management of Biomedical Health Risks” of the Federal Medical Biological Agency, Laboratory for advanced molecular diagnostics of human diseases.	119121, Moscow, Russia, Pogodinskaya str. 10	LQ-21868_S8/2022
123333	csp_omicron.fasta	hCoV-19/Russia/MOW-CSP-LQ-21871_S9/2022	betacoronavirus	Original	2022-01-19	Europe/Russia/Moscow/Moscow	Human	unknown	unknown	unknown	Illumina NextSeq	bwa mapping + consensus		Chief Federal State Budgetary Healthcare Institution “Centre of Hygiene and Epidemiology” of the Federal Medical Biological Agency, Central laboratory of microbiological and clinical diagnostic tests		Federal State Budgetary Institution “Centre for Strategic Planning and Management of Biomedical Health Risks” of the Federal Medical Biological Agency, Laboratory for advanced molecular diagnostics of human diseases.	119121, Moscow, Russia, Pogodinskaya str. 10	LQ-21871_S9/2022
123333	csp_omicron.fasta	hCoV-19/Russia/MOW-CSP-LQ-21874_S10/2022	betacoronavirus	Original	2022-01-19	Europe/Russia/Moscow/Moscow	Human	unknown	unknown	unknown	Illumina NextSeq	bwa mapping + consensus		Chief Federal State Budgetary Healthcare Institution “Centre of Hygiene and Epidemiology” of the Federal Medical Biological Agency, Central laboratory of microbiological and clinical diagnostic tests		Federal State Budgetary Institution “Centre for Strategic Planning and Management of Biomedical Health Risks” of the Federal Medical Biological Agency, Laboratory for advanced molecular diagnostics of human diseases.	119121, Moscow, Russia, Pogodinskaya str. 10	LQ-21874_S10/2022
123333	csp_omicron.fasta	hCoV-19/Russia/MOW-CSP-LQ-21880_S11/2022	betacoronavirus	Original	2022-01-19	Europe/Russia/Moscow/Moscow	Human	unknown	unknown	unknown	Illumina NextSeq	bwa mapping + consensus		Chief Federal State Budgetary Healthcare Institution “Centre of Hygiene and Epidemiology” of the Federal Medical Biological Agency, Central laboratory of microbiological and clinical diagnostic tests		Federal State Budgetary Institution “Centre for Strategic Planning and Management of Biomedical Health Risks” of the Federal Medical Biological Agency, Laboratory for advanced molecular diagnostics of human diseases.	119121, Moscow, Russia, Pogodinskaya str. 10	LQ-21880_S11/2022
123333	csp_omicron.fasta	hCoV-19/Russia/MOW-CSP-LQ-21884_S12/2022	betacoronavirus	Original	2022-01-19	Europe/Russia/Moscow/Moscow	Human	unknown	unknown	unknown	Illumina NextSeq	bwa mapping + consensus		Chief Federal State Budgetary Healthcare Institution “Centre of Hygiene and Epidemiology” of the Federal Medical Biological Agency, Central laboratory of microbiological and clinical diagnostic tests		Federal State Budgetary Institution “Centre for Strategic Planning and Management of Biomedical Health Risks” of the Federal Medical Biological Agency, Laboratory for advanced molecular diagnostics of human diseases.	119121, Moscow, Russia, Pogodinskaya str. 10	LQ-21884_S12/2022
123333	csp_omicron.fasta	hCoV-19/Russia/MOW-CSP-LQ-21885_S13/2022	betacoronavirus	Original	2022-01-19	Europe/Russia/Moscow/Moscow	Human	unknown	unknown	unknown	Illumina NextSeq	bwa mapping + consensus		Chief Federal State Budgetary Healthcare Institution “Centre of Hygiene and Epidemiology” of the Federal Medical Biological Agency, Central laboratory of microbiological and clinical diagnostic tests		Federal State Budgetary Institution “Centre for Strategic Planning and Management of Biomedical Health Risks” of the Federal Medical Biological Agency, Laboratory for advanced molecular diagnostics of human diseases.	119121, Moscow, Russia, Pogodinskaya str. 10	LQ-21885_S13/2022
123333	csp_omicron.fasta	hCoV-19/Russia/MOW-CSP-LQ-21901_S15/2022	betacoronavirus	Original	2022-01-19	Europe/Russia/Moscow/Moscow	Human	unknown	unknown	unknown	Illumina NextSeq	bwa mapping + consensus		Chief Federal State Budgetary Healthcare Institution “Centre of Hygiene and Epidemiology” of the Federal Medical Biological Agency, Central laboratory of microbiological and clinical diagnostic tests		Federal State Budgetary Institution “Centre for Strategic Planning and Management of Biomedical Health Risks” of the Federal Medical Biological Agency, Laboratory for advanced molecular diagnostics of human diseases.	119121, Moscow, Russia, Pogodinskaya str. 10	LQ-21901_S15/2022
123333	csp_omicron.fasta	hCoV-19/Russia/MOW-CSP-LQ-21903_S16/2022	betacoronavirus	Original	2022-01-19	Europe/Russia/Moscow/Moscow	Human	unknown	unknown	unknown	Illumina NextSeq	bwa mapping + consensus		Chief Federal State Budgetary Healthcare Institution “Centre of Hygiene and Epidemiology” of the Federal Medical Biological Agency, Central laboratory of microbiological and clinical diagnostic tests		Federal State Budgetary Institution “Centre for Strategic Planning and Management of Biomedical Health Risks” of the Federal Medical Biological Agency, Laboratory for advanced molecular diagnostics of human diseases.	119121, Moscow, Russia, Pogodinskaya str. 10	LQ-21903_S16/2022
123333	csp_omicron.fasta	hCoV-19/Russia/MOW-CSP-LQ-21917_S17/2022	betacoronavirus	Original	2022-01-19	Europe/Russia/Moscow/Moscow	Human	unknown	unknown	unknown	Illumina NextSeq	bwa mapping + consensus		Chief Federal State Budgetary Healthcare Institution “Centre of Hygiene and Epidemiology” of the Federal Medical Biological Agency, Central laboratory of microbiological and clinical diagnostic tests		Federal State Budgetary Institution “Centre for Strategic Planning and Management of Biomedical Health Risks” of the Federal Medical Biological Agency, Laboratory for advanced molecular diagnostics of human diseases.	119121, Moscow, Russia, Pogodinskaya str. 10	LQ-21917_S17/2022
123333	csp_omicron.fasta	hCoV-19/Russia/MOW-CSP-LQ-21922_S18/2022	betacoronavirus	Original	2022-01-20	Europe/Russia/Moscow/Moscow	Human	unknown	unknown	unknown	Illumina NextSeq	bwa mapping + consensus		Chief Federal State Budgetary Healthcare Institution “Centre of Hygiene and Epidemiology” of the Federal Medical Biological Agency, Central laboratory of microbiological and clinical diagnostic tests		Federal State Budgetary Institution “Centre for Strategic Planning and Management of Biomedical Health Risks” of the Federal Medical Biological Agency, Laboratory for advanced molecular diagnostics of human diseases.	119121, Moscow, Russia, Pogodinskaya str. 10	LQ-21922_S18/2022
123333	csp_omicron.fasta	hCoV-19/Russia/MOW-CSP-LQ-21925_S19/2022	betacoronavirus	Original	2022-01-20	Europe/Russia/Moscow/Moscow	Human	unknown	unknown	unknown	Illumina NextSeq	bwa mapping + consensus		Chief Federal State Budgetary Healthcare Institution “Centre of Hygiene and Epidemiology” of the Federal Medical Biological Agency, Central laboratory of microbiological and clinical diagnostic tests		Federal State Budgetary Institution “Centre for Strategic Planning and Management of Biomedical Health Risks” of the Federal Medical Biological Agency, Laboratory for advanced molecular diagnostics of human diseases.	119121, Moscow, Russia, Pogodinskaya str. 10	LQ-21925_S19/2022
123333	csp_omicron.fasta	hCoV-19/Russia/MOW-CSP-LQ-21928_S20/2022	betacoronavirus	Original	2022-01-20	Europe/Russia/Moscow/Moscow	Human	unknown	unknown	unknown	Illumina NextSeq	bwa mapping + consensus		Chief Federal State Budgetary Healthcare Institution “Centre of Hygiene and Epidemiology” of the Federal Medical Biological Agency, Central laboratory of microbiological and clinical diagnostic tests		Federal State Budgetary Institution “Centre for Strategic Planning and Management of Biomedical Health Risks” of the Federal Medical Biological Agency, Laboratory for advanced molecular diagnostics of human diseases.	119121, Moscow, Russia, Pogodinskaya str. 10	LQ-21928_S20/2022
123333	csp_omicron.fasta	hCoV-19/Russia/MOW-CSP-LQ-21932_S21/2022	betacoronavirus	Original	2022-01-20	Europe/Russia/Moscow/Moscow	Human	unknown	unknown	unknown	Illumina NextSeq	bwa mapping + consensus		Chief Federal State Budgetary Healthcare Institution “Centre of Hygiene and Epidemiology” of the Federal Medical Biological Agency, Central laboratory of microbiological and clinical diagnostic tests		Federal State Budgetary Institution “Centre for Strategic Planning and Management of Biomedical Health Risks” of the Federal Medical Biological Agency, Laboratory for advanced molecular diagnostics of human diseases.	119121, Moscow, Russia, Pogodinskaya str. 10	LQ-21932_S21/2022
123333	csp_omicron.fasta	hCoV-19/Russia/MOW-CSP-LQ-21937_S22/2022	betacoronavirus	Original	2022-01-20	Europe/Russia/Moscow/Moscow	Human	unknown	unknown	unknown	Illumina NextSeq	bwa mapping + consensus		Chief Federal State Budgetary Healthcare Institution “Centre of Hygiene and Epidemiology” of the Federal Medical Biological Agency, Central laboratory of microbiological and clinical diagnostic tests		Federal State Budgetary Institution “Centre for Strategic Planning and Management of Biomedical Health Risks” of the Federal Medical Biological Agency, Laboratory for advanced molecular diagnostics of human diseases.	119121, Moscow, Russia, Pogodinskaya str. 10	LQ-21937_S22/2022
123333	csp_omicron.fasta	hCoV-19/Russia/MOW-CSP-LQ-21940_S191/2022	betacoronavirus	Original	2022-01-20	Europe/Russia/Moscow/Moscow	Human	unknown	unknown	unknown	Illumina NextSeq	bwa mapping + consensus		Chief Federal State Budgetary Healthcare Institution “Centre of Hygiene and Epidemiology” of the Federal Medical Biological Agency, Central laboratory of microbiological and clinical diagnostic tests		Federal State Budgetary Institution “Centre for Strategic Planning and Management of Biomedical Health Risks” of the Federal Medical Biological Agency, Laboratory for advanced molecular diagnostics of human diseases.	119121, Moscow, Russia, Pogodinskaya str. 10	LQ-21940_S191/2022
123333	csp_omicron.fasta	hCoV-19/Russia/MOW-CSP-LQ-21943_S23/2022	betacoronavirus	Original	2022-01-20	Europe/Russia/Moscow/Moscow	Human	unknown	unknown	unknown	Illumina NextSeq	bwa mapping + consensus		Chief Federal State Budgetary Healthcare Institution “Centre of Hygiene and Epidemiology” of the Federal Medical Biological Agency, Central laboratory of microbiological and clinical diagnostic tests		Federal State Budgetary Institution “Centre for Strategic Planning and Management of Biomedical Health Risks” of the Federal Medical Biological Agency, Laboratory for advanced molecular diagnostics of human diseases.	119121, Moscow, Russia, Pogodinskaya str. 10	LQ-21943_S23/2022
123333	csp_omicron.fasta	hCoV-19/Russia/MOW-CSP-LQ-21953_S24/2022	betacoronavirus	Original	2022-01-20	Europe/Russia/Moscow/Moscow	Human	unknown	unknown	unknown	Illumina NextSeq	bwa mapping + consensus		Chief Federal State Budgetary Healthcare Institution “Centre of Hygiene and Epidemiology” of the Federal Medical Biological Agency, Central laboratory of microbiological and clinical diagnostic tests		Federal State Budgetary Institution “Centre for Strategic Planning and Management of Biomedical Health Risks” of the Federal Medical Biological Agency, Laboratory for advanced molecular diagnostics of human diseases.	119121, Moscow, Russia, Pogodinskaya str. 10	LQ-21953_S24/2022
123333	csp_omicron.fasta	hCoV-19/Russia/MOW-CSP-LQ-21954_S25/2022	betacoronavirus	Original	2022-01-20	Europe/Russia/Moscow/Moscow	Human	unknown	unknown	unknown	Illumina NextSeq	bwa mapping + consensus		Chief Federal State Budgetary Healthcare Institution “Centre of Hygiene and Epidemiology” of the Federal Medical Biological Agency, Central laboratory of microbiological and clinical diagnostic tests		Federal State Budgetary Institution “Centre for Strategic Planning and Management of Biomedical Health Risks” of the Federal Medical Biological Agency, Laboratory for advanced molecular diagnostics of human diseases.	119121, Moscow, Russia, Pogodinskaya str. 10	LQ-21954_S25/2022
123333	csp_omicron.fasta	hCoV-19/Russia/MOW-CSP-LQ-21955_S26/2022	betacoronavirus	Original	2022-01-20	Europe/Russia/Moscow/Moscow	Human	unknown	unknown	unknown	Illumina NextSeq	bwa mapping + consensus		Chief Federal State Budgetary Healthcare Institution “Centre of Hygiene and Epidemiology” of the Federal Medical Biological Agency, Central laboratory of microbiological and clinical diagnostic tests		Federal State Budgetary Institution “Centre for Strategic Planning and Management of Biomedical Health Risks” of the Federal Medical Biological Agency, Laboratory for advanced molecular diagnostics of human diseases.	119121, Moscow, Russia, Pogodinskaya str. 10	LQ-21955_S26/2022
123333	csp_omicron.fasta	hCoV-19/Russia/MOW-CSP-LQ-21966_S27/2022	betacoronavirus	Original	2022-01-20	Europe/Russia/Moscow/Moscow	Human	unknown	unknown	unknown	Illumina NextSeq	bwa mapping + consensus		Chief Federal State Budgetary Healthcare Institution “Centre of Hygiene and Epidemiology” of the Federal Medical Biological Agency, Central laboratory of microbiological and clinical diagnostic tests		Federal State Budgetary Institution “Centre for Strategic Planning and Management of Biomedical Health Risks” of the Federal Medical Biological Agency, Laboratory for advanced molecular diagnostics of human diseases.	119121, Moscow, Russia, Pogodinskaya str. 10	LQ-21966_S27/2022
123333	csp_omicron.fasta	hCoV-19/Russia/MOW-CSP-LQ-21968_S28/2022	betacoronavirus	Original	2022-01-20	Europe/Russia/Moscow/Moscow	Human	unknown	unknown	unknown	Illumina NextSeq	bwa mapping + consensus		Chief Federal State Budgetary Healthcare Institution “Centre of Hygiene and Epidemiology” of the Federal Medical Biological Agency, Central laboratory of microbiological and clinical diagnostic tests		Federal State Budgetary Institution “Centre for Strategic Planning and Management of Biomedical Health Risks” of the Federal Medical Biological Agency, Laboratory for advanced molecular diagnostics of human diseases.	119121, Moscow, Russia, Pogodinskaya str. 10	LQ-21968_S28/2022
123333	csp_omicron.fasta	hCoV-19/Russia/MOW-CSP-LQ-21974_S29/2022	betacoronavirus	Original	2022-01-20	Europe/Russia/Moscow/Moscow	Human	unknown	unknown	unknown	Illumina NextSeq	bwa mapping + consensus		Chief Federal State Budgetary Healthcare Institution “Centre of Hygiene and Epidemiology” of the Federal Medical Biological Agency, Central laboratory of microbiological and clinical diagnostic tests		Federal State Budgetary Institution “Centre for Strategic Planning and Management of Biomedical Health Risks” of the Federal Medical Biological Agency, Laboratory for advanced molecular diagnostics of human diseases.	119121, Moscow, Russia, Pogodinskaya str. 10	LQ-21974_S29/2022
123333	csp_omicron.fasta	hCoV-19/Russia/MOW-CSP-LQ-21975_S30/2022	betacoronavirus	Original	2022-01-20	Europe/Russia/Moscow/Moscow	Human	unknown	unknown	unknown	Illumina NextSeq	bwa mapping + consensus		Chief Federal State Budgetary Healthcare Institution “Centre of Hygiene and Epidemiology” of the Federal Medical Biological Agency, Central laboratory of microbiological and clinical diagnostic tests		Federal State Budgetary Institution “Centre for Strategic Planning and Management of Biomedical Health Risks” of the Federal Medical Biological Agency, Laboratory for advanced molecular diagnostics of human diseases.	119121, Moscow, Russia, Pogodinskaya str. 10	LQ-21975_S30/2022
123333	csp_omicron.fasta	hCoV-19/Russia/MOW-CSP-LQ-21977_S31/2022	betacoronavirus	Original	2022-01-20	Europe/Russia/Moscow/Moscow	Human	unknown	unknown	unknown	Illumina NextSeq	bwa mapping + consensus		Chief Federal State Budgetary Healthcare Institution “Centre of Hygiene and Epidemiology” of the Federal Medical Biological Agency, Central laboratory of microbiological and clinical diagnostic tests		Federal State Budgetary Institution “Centre for Strategic Planning and Management of Biomedical Health Risks” of the Federal Medical Biological Agency, Laboratory for advanced molecular diagnostics of human diseases.	119121, Moscow, Russia, Pogodinskaya str. 10	LQ-21977_S31/2022
123333	csp_omicron.fasta	hCoV-19/Russia/MOW-CSP-LQ-21979_S32/2022	betacoronavirus	Original	2022-01-20	Europe/Russia/Moscow/Moscow	Human	unknown	unknown	unknown	Illumina NextSeq	bwa mapping + consensus		Chief Federal State Budgetary Healthcare Institution “Centre of Hygiene and Epidemiology” of the Federal Medical Biological Agency, Central laboratory of microbiological and clinical diagnostic tests		Federal State Budgetary Institution “Centre for Strategic Planning and Management of Biomedical Health Risks” of the Federal Medical Biological Agency, Laboratory for advanced molecular diagnostics of human diseases.	119121, Moscow, Russia, Pogodinskaya str. 10	LQ-21979_S32/2022
123333	csp_omicron.fasta	hCoV-19/Russia/MOW-CSP-LQ-21987_S33/2022	betacoronavirus	Original	2022-01-20	Europe/Russia/Moscow/Moscow	Human	unknown	unknown	unknown	Illumina NextSeq	bwa mapping + consensus		Chief Federal State Budgetary Healthcare Institution “Centre of Hygiene and Epidemiology” of the Federal Medical Biological Agency, Central laboratory of microbiological and clinical diagnostic tests		Federal State Budgetary Institution “Centre for Strategic Planning and Management of Biomedical Health Risks” of the Federal Medical Biological Agency, Laboratory for advanced molecular diagnostics of human diseases.	119121, Moscow, Russia, Pogodinskaya str. 10	LQ-21987_S33/2022
123333	csp_omicron.fasta	hCoV-19/Russia/MOW-CSP-LQ-21998_S34/2022	betacoronavirus	Original	2022-01-20	Europe/Russia/Moscow/Moscow	Human	unknown	unknown	unknown	Illumina NextSeq	bwa mapping + consensus		Chief Federal State Budgetary Healthcare Institution “Centre of Hygiene and Epidemiology” of the Federal Medical Biological Agency, Central laboratory of microbiological and clinical diagnostic tests		Federal State Budgetary Institution “Centre for Strategic Planning and Management of Biomedical Health Risks” of the Federal Medical Biological Agency, Laboratory for advanced molecular diagnostics of human diseases.	119121, Moscow, Russia, Pogodinskaya str. 10	LQ-21998_S34/2022
123333	csp_omicron.fasta	hCoV-19/Russia/MOW-CSP-LQ-22002_S35/2022	betacoronavirus	Original	2022-01-20	Europe/Russia/Moscow/Moscow	Human	unknown	unknown	unknown	Illumina NextSeq	bwa mapping + consensus		Chief Federal State Budgetary Healthcare Institution “Centre of Hygiene and Epidemiology” of the Federal Medical Biological Agency, Central laboratory of microbiological and clinical diagnostic tests		Federal State Budgetary Institution “Centre for Strategic Planning and Management of Biomedical Health Risks” of the Federal Medical Biological Agency, Laboratory for advanced molecular diagnostics of human diseases.	119121, Moscow, Russia, Pogodinskaya str. 10	LQ-22002_S35/2022
123333	csp_omicron.fasta	hCoV-19/Russia/MOW-CSP-LQ-22007_S36/2022	betacoronavirus	Original	2022-01-20	Europe/Russia/Moscow/Moscow	Human	unknown	unknown	unknown	Illumina NextSeq	bwa mapping + consensus		Chief Federal State Budgetary Healthcare Institution “Centre of Hygiene and Epidemiology” of the Federal Medical Biological Agency, Central laboratory of microbiological and clinical diagnostic tests		Federal State Budgetary Institution “Centre for Strategic Planning and Management of Biomedical Health Risks” of the Federal Medical Biological Agency, Laboratory for advanced molecular diagnostics of human diseases.	119121, Moscow, Russia, Pogodinskaya str. 10	LQ-22007_S36/2022
123333	csp_omicron.fasta	hCoV-19/Russia/MOW-CSP-LQ-22018_S37/2022	betacoronavirus	Original	2022-01-20	Europe/Russia/Moscow/Moscow	Human	unknown	unknown	unknown	Illumina NextSeq	bwa mapping + consensus		Chief Federal State Budgetary Healthcare Institution “Centre of Hygiene and Epidemiology” of the Federal Medical Biological Agency, Central laboratory of microbiological and clinical diagnostic tests		Federal State Budgetary Institution “Centre for Strategic Planning and Management of Biomedical Health Risks” of the Federal Medical Biological Agency, Laboratory for advanced molecular diagnostics of human diseases.	119121, Moscow, Russia, Pogodinskaya str. 10	LQ-22018_S37/2022
123333	csp_omicron.fasta	hCoV-19/Russia/MOW-CSP-LQ-22025_S192/2022	betacoronavirus	Original	2022-01-20	Europe/Russia/Moscow/Moscow	Human	unknown	unknown	unknown	Illumina NextSeq	bwa mapping + consensus		Chief Federal State Budgetary Healthcare Institution “Centre of Hygiene and Epidemiology” of the Federal Medical Biological Agency, Central laboratory of microbiological and clinical diagnostic tests		Federal State Budgetary Institution “Centre for Strategic Planning and Management of Biomedical Health Risks” of the Federal Medical Biological Agency, Laboratory for advanced molecular diagnostics of human diseases.	119121, Moscow, Russia, Pogodinskaya str. 10	LQ-22025_S192/2022
123333	csp_omicron.fasta	hCoV-19/Russia/MOW-CSP-LQ-22033_S39/2022	betacoronavirus	Original	2022-01-20	Europe/Russia/Moscow/Moscow	Human	unknown	unknown	unknown	Illumina NextSeq	bwa mapping + consensus		Chief Federal State Budgetary Healthcare Institution “Centre of Hygiene and Epidemiology” of the Federal Medical Biological Agency, Central laboratory of microbiological and clinical diagnostic tests		Federal State Budgetary Institution “Centre for Strategic Planning and Management of Biomedical Health Risks” of the Federal Medical Biological Agency, Laboratory for advanced molecular diagnostics of human diseases.	119121, Moscow, Russia, Pogodinskaya str. 10	LQ-22033_S39/2022
123333	csp_omicron.fasta	hCoV-19/Russia/MOW-CSP-LQ-22034_S40/2022	betacoronavirus	Original	2022-01-20	Europe/Russia/Moscow/Moscow	Human	unknown	unknown	unknown	Illumina NextSeq	bwa mapping + consensus		Chief Federal State Budgetary Healthcare Institution “Centre of Hygiene and Epidemiology” of the Federal Medical Biological Agency, Central laboratory of microbiological and clinical diagnostic tests		Federal State Budgetary Institution “Centre for Strategic Planning and Management of Biomedical Health Risks” of the Federal Medical Biological Agency, Laboratory for advanced molecular diagnostics of human diseases.	119121, Moscow, Russia, Pogodinskaya str. 10	LQ-22034_S40/2022
123333	csp_omicron.fasta	hCoV-19/Russia/MOW-CSP-LQ-22036_S41/2022	betacoronavirus	Original	2022-01-20	Europe/Russia/Moscow/Moscow	Human	unknown	unknown	unknown	Illumina NextSeq	bwa mapping + consensus		Chief Federal State Budgetary Healthcare Institution “Centre of Hygiene and Epidemiology” of the Federal Medical Biological Agency, Central laboratory of microbiological and clinical diagnostic tests		Federal State Budgetary Institution “Centre for Strategic Planning and Management of Biomedical Health Risks” of the Federal Medical Biological Agency, Laboratory for advanced molecular diagnostics of human diseases.	119121, Moscow, Russia, Pogodinskaya str. 10	LQ-22036_S41/2022
123333	csp_omicron.fasta	hCoV-19/Russia/MOW-CSP-LQ-22045_S42/2022	betacoronavirus	Original	2022-01-20	Europe/Russia/Moscow/Moscow	Human	unknown	unknown	unknown	Illumina NextSeq	bwa mapping + consensus		Chief Federal State Budgetary Healthcare Institution “Centre of Hygiene and Epidemiology” of the Federal Medical Biological Agency, Central laboratory of microbiological and clinical diagnostic tests		Federal State Budgetary Institution “Centre for Strategic Planning and Management of Biomedical Health Risks” of the Federal Medical Biological Agency, Laboratory for advanced molecular diagnostics of human diseases.	119121, Moscow, Russia, Pogodinskaya str. 10	LQ-22045_S42/2022
123333	csp_omicron.fasta	hCoV-19/Russia/MOW-CSP-LQ-22083_S43/2022	betacoronavirus	Original	2022-01-20	Europe/Russia/Moscow/Moscow	Human	unknown	unknown	unknown	Illumina NextSeq	bwa mapping + consensus		Chief Federal State Budgetary Healthcare Institution “Centre of Hygiene and Epidemiology” of the Federal Medical Biological Agency, Central laboratory of microbiological and clinical diagnostic tests		Federal State Budgetary Institution “Centre for Strategic Planning and Management of Biomedical Health Risks” of the Federal Medical Biological Agency, Laboratory for advanced molecular diagnostics of human diseases.	119121, Moscow, Russia, Pogodinskaya str. 10	LQ-22083_S43/2022
123333	csp_omicron.fasta	hCoV-19/Russia/MOW-CSP-LQ-22089_S44/2022	betacoronavirus	Original	2022-01-20	Europe/Russia/Moscow/Moscow	Human	unknown	unknown	unknown	Illumina NextSeq	bwa mapping + consensus		Chief Federal State Budgetary Healthcare Institution “Centre of Hygiene and Epidemiology” of the Federal Medical Biological Agency, Central laboratory of microbiological and clinical diagnostic tests		Federal State Budgetary Institution “Centre for Strategic Planning and Management of Biomedical Health Risks” of the Federal Medical Biological Agency, Laboratory for advanced molecular diagnostics of human diseases.	119121, Moscow, Russia, Pogodinskaya str. 10	LQ-22089_S44/2022
123333	csp_omicron.fasta	hCoV-19/Russia/MOW-CSP-LQ-22090_S45/2022	betacoronavirus	Original	2022-01-20	Europe/Russia/Moscow/Moscow	Human	unknown	unknown	unknown	Illumina NextSeq	bwa mapping + consensus		Chief Federal State Budgetary Healthcare Institution “Centre of Hygiene and Epidemiology” of the Federal Medical Biological Agency, Central laboratory of microbiological and clinical diagnostic tests		Federal State Budgetary Institution “Centre for Strategic Planning and Management of Biomedical Health Risks” of the Federal Medical Biological Agency, Laboratory for advanced molecular diagnostics of human diseases.	119121, Moscow, Russia, Pogodinskaya str. 10	LQ-22090_S45/2022
123333	csp_omicron.fasta	hCoV-19/Russia/MOW-CSP-LQ-22094_S46/2022	betacoronavirus	Original	2022-01-20	Europe/Russia/Moscow/Moscow	Human	unknown	unknown	unknown	Illumina NextSeq	bwa mapping + consensus		Chief Federal State Budgetary Healthcare Institution “Centre of Hygiene and Epidemiology” of the Federal Medical Biological Agency, Central laboratory of microbiological and clinical diagnostic tests		Federal State Budgetary Institution “Centre for Strategic Planning and Management of Biomedical Health Risks” of the Federal Medical Biological Agency, Laboratory for advanced molecular diagnostics of human diseases.	119121, Moscow, Russia, Pogodinskaya str. 10	LQ-22094_S46/2022
123333	csp_omicron.fasta	hCoV-19/Russia/MOW-CSP-LQ-22097_S47/2022	betacoronavirus	Original	2022-01-20	Europe/Russia/Moscow/Moscow	Human	unknown	unknown	unknown	Illumina NextSeq	bwa mapping + consensus		Chief Federal State Budgetary Healthcare Institution “Centre of Hygiene and Epidemiology” of the Federal Medical Biological Agency, Central laboratory of microbiological and clinical diagnostic tests		Federal State Budgetary Institution “Centre for Strategic Planning and Management of Biomedical Health Risks” of the Federal Medical Biological Agency, Laboratory for advanced molecular diagnostics of human diseases.	119121, Moscow, Russia, Pogodinskaya str. 10	LQ-22097_S47/2022
123333	csp_omicron.fasta	hCoV-19/Russia/MOW-CSP-LQ-22100_S48/2022	betacoronavirus	Original	2022-01-20	Europe/Russia/Moscow/Moscow	Human	unknown	unknown	unknown	Illumina NextSeq	bwa mapping + consensus		Chief Federal State Budgetary Healthcare Institution “Centre of Hygiene and Epidemiology” of the Federal Medical Biological Agency, Central laboratory of microbiological and clinical diagnostic tests		Federal State Budgetary Institution “Centre for Strategic Planning and Management of Biomedical Health Risks” of the Federal Medical Biological Agency, Laboratory for advanced molecular diagnostics of human diseases.	119121, Moscow, Russia, Pogodinskaya str. 10	LQ-22100_S48/2022
123333	csp_omicron.fasta	hCoV-19/Russia/MOW-CSP-LQ-22109_S49/2022	betacoronavirus	Original	2022-01-20	Europe/Russia/Moscow/Moscow	Human	unknown	unknown	unknown	Illumina NextSeq	bwa mapping + consensus		Chief Federal State Budgetary Healthcare Institution “Centre of Hygiene and Epidemiology” of the Federal Medical Biological Agency, Central laboratory of microbiological and clinical diagnostic tests		Federal State Budgetary Institution “Centre for Strategic Planning and Management of Biomedical Health Risks” of the Federal Medical Biological Agency, Laboratory for advanced molecular diagnostics of human diseases.	119121, Moscow, Russia, Pogodinskaya str. 10	LQ-22109_S49/2022
123333	csp_omicron.fasta	hCoV-19/Russia/MOW-CSP-LQ-22115_S50/2022	betacoronavirus	Original	2022-01-20	Europe/Russia/Moscow/Moscow	Human	unknown	unknown	unknown	Illumina NextSeq	bwa mapping + consensus		Chief Federal State Budgetary Healthcare Institution “Centre of Hygiene and Epidemiology” of the Federal Medical Biological Agency, Central laboratory of microbiological and clinical diagnostic tests		Federal State Budgetary Institution “Centre for Strategic Planning and Management of Biomedical Health Risks” of the Federal Medical Biological Agency, Laboratory for advanced molecular diagnostics of human diseases.	119121, Moscow, Russia, Pogodinskaya str. 10	LQ-22115_S50/2022
123333	csp_omicron.fasta	hCoV-19/Russia/MOW-CSP-LQ-22116_S51/2022	betacoronavirus	Original	2022-01-20	Europe/Russia/Moscow/Moscow	Human	unknown	unknown	unknown	Illumina NextSeq	bwa mapping + consensus		Chief Federal State Budgetary Healthcare Institution “Centre of Hygiene and Epidemiology” of the Federal Medical Biological Agency, Central laboratory of microbiological and clinical diagnostic tests		Federal State Budgetary Institution “Centre for Strategic Planning and Management of Biomedical Health Risks” of the Federal Medical Biological Agency, Laboratory for advanced molecular diagnostics of human diseases.	119121, Moscow, Russia, Pogodinskaya str. 10	LQ-22116_S51/2022
123333	csp_omicron.fasta	hCoV-19/Russia/MOW-CSP-LQ-22132_S52/2022	betacoronavirus	Original	2022-01-21	Europe/Russia/Moscow/Moscow	Human	unknown	unknown	unknown	Illumina NextSeq	bwa mapping + consensus		Chief Federal State Budgetary Healthcare Institution “Centre of Hygiene and Epidemiology” of the Federal Medical Biological Agency, Central laboratory of microbiological and clinical diagnostic tests		Federal State Budgetary Institution “Centre for Strategic Planning and Management of Biomedical Health Risks” of the Federal Medical Biological Agency, Laboratory for advanced molecular diagnostics of human diseases.	119121, Moscow, Russia, Pogodinskaya str. 10	LQ-22132_S52/2022
123333	csp_omicron.fasta	hCoV-19/Russia/MOW-CSP-LQ-22139_S55/2022	betacoronavirus	Original	2022-01-21	Europe/Russia/Moscow/Moscow	Human	unknown	unknown	unknown	Illumina NextSeq	bwa mapping + consensus		Chief Federal State Budgetary Healthcare Institution “Centre of Hygiene and Epidemiology” of the Federal Medical Biological Agency, Central laboratory of microbiological and clinical diagnostic tests		Federal State Budgetary Institution “Centre for Strategic Planning and Management of Biomedical Health Risks” of the Federal Medical Biological Agency, Laboratory for advanced molecular diagnostics of human diseases.	119121, Moscow, Russia, Pogodinskaya str. 10	LQ-22139_S55/2022
123333	csp_omicron.fasta	hCoV-19/Russia/MOW-CSP-LQ-22145_S57/2022	betacoronavirus	Original	2022-01-21	Europe/Russia/Moscow/Moscow	Human	unknown	unknown	unknown	Illumina NextSeq	bwa mapping + consensus		Chief Federal State Budgetary Healthcare Institution “Centre of Hygiene and Epidemiology” of the Federal Medical Biological Agency, Central laboratory of microbiological and clinical diagnostic tests		Federal State Budgetary Institution “Centre for Strategic Planning and Management of Biomedical Health Risks” of the Federal Medical Biological Agency, Laboratory for advanced molecular diagnostics of human diseases.	119121, Moscow, Russia, Pogodinskaya str. 10	LQ-22145_S57/2022
123333	csp_omicron.fasta	hCoV-19/Russia/MOW-CSP-LQ-22147_S58/2022	betacoronavirus	Original	2022-01-21	Europe/Russia/Moscow/Moscow	Human	unknown	unknown	unknown	Illumina NextSeq	bwa mapping + consensus		Chief Federal State Budgetary Healthcare Institution “Centre of Hygiene and Epidemiology” of the Federal Medical Biological Agency, Central laboratory of microbiological and clinical diagnostic tests		Federal State Budgetary Institution “Centre for Strategic Planning and Management of Biomedical Health Risks” of the Federal Medical Biological Agency, Laboratory for advanced molecular diagnostics of human diseases.	119121, Moscow, Russia, Pogodinskaya str. 10	LQ-22147_S58/2022
123333	csp_omicron.fasta	hCoV-19/Russia/MOW-CSP-LQ-22152_S60/2022	betacoronavirus	Original	2022-01-21	Europe/Russia/Moscow/Moscow	Human	unknown	unknown	unknown	Illumina NextSeq	bwa mapping + consensus		Chief Federal State Budgetary Healthcare Institution “Centre of Hygiene and Epidemiology” of the Federal Medical Biological Agency, Central laboratory of microbiological and clinical diagnostic tests		Federal State Budgetary Institution “Centre for Strategic Planning and Management of Biomedical Health Risks” of the Federal Medical Biological Agency, Laboratory for advanced molecular diagnostics of human diseases.	119121, Moscow, Russia, Pogodinskaya str. 10	LQ-22152_S60/2022
123333	csp_omicron.fasta	hCoV-19/Russia/MOW-CSP-LQ-22155_S61/2022	betacoronavirus	Original	2022-01-21	Europe/Russia/Moscow/Moscow	Human	unknown	unknown	unknown	Illumina NextSeq	bwa mapping + consensus		Chief Federal State Budgetary Healthcare Institution “Centre of Hygiene and Epidemiology” of the Federal Medical Biological Agency, Central laboratory of microbiological and clinical diagnostic tests		Federal State Budgetary Institution “Centre for Strategic Planning and Management of Biomedical Health Risks” of the Federal Medical Biological Agency, Laboratory for advanced molecular diagnostics of human diseases.	119121, Moscow, Russia, Pogodinskaya str. 10	LQ-22155_S61/2022
123333	csp_omicron.fasta	hCoV-19/Russia/MOW-CSP-LQ-22160_S62/2022	betacoronavirus	Original	2022-01-21	Europe/Russia/Moscow/Moscow	Human	unknown	unknown	unknown	Illumina NextSeq	bwa mapping + consensus		Chief Federal State Budgetary Healthcare Institution “Centre of Hygiene and Epidemiology” of the Federal Medical Biological Agency, Central laboratory of microbiological and clinical diagnostic tests		Federal State Budgetary Institution “Centre for Strategic Planning and Management of Biomedical Health Risks” of the Federal Medical Biological Agency, Laboratory for advanced molecular diagnostics of human diseases.	119121, Moscow, Russia, Pogodinskaya str. 10	LQ-22160_S62/2022
123333	csp_omicron.fasta	hCoV-19/Russia/MOW-CSP-LQ-22170_S63/2022	betacoronavirus	Original	2022-01-21	Europe/Russia/Moscow/Moscow	Human	unknown	unknown	unknown	Illumina NextSeq	bwa mapping + consensus		Chief Federal State Budgetary Healthcare Institution “Centre of Hygiene and Epidemiology” of the Federal Medical Biological Agency, Central laboratory of microbiological and clinical diagnostic tests		Federal State Budgetary Institution “Centre for Strategic Planning and Management of Biomedical Health Risks” of the Federal Medical Biological Agency, Laboratory for advanced molecular diagnostics of human diseases.	119121, Moscow, Russia, Pogodinskaya str. 10	LQ-22170_S63/2022
123333	csp_omicron.fasta	hCoV-19/Russia/MOW-CSP-LQ-22172_S64/2022	betacoronavirus	Original	2022-01-21	Europe/Russia/Moscow/Moscow	Human	unknown	unknown	unknown	Illumina NextSeq	bwa mapping + consensus		Chief Federal State Budgetary Healthcare Institution “Centre of Hygiene and Epidemiology” of the Federal Medical Biological Agency, Central laboratory of microbiological and clinical diagnostic tests		Federal State Budgetary Institution “Centre for Strategic Planning and Management of Biomedical Health Risks” of the Federal Medical Biological Agency, Laboratory for advanced molecular diagnostics of human diseases.	119121, Moscow, Russia, Pogodinskaya str. 10	LQ-22172_S64/2022
123333	csp_omicron.fasta	hCoV-19/Russia/MOW-CSP-LQ-22173_S65/2022	betacoronavirus	Original	2022-01-21	Europe/Russia/Moscow/Moscow	Human	unknown	unknown	unknown	Illumina NextSeq	bwa mapping + consensus		Chief Federal State Budgetary Healthcare Institution “Centre of Hygiene and Epidemiology” of the Federal Medical Biological Agency, Central laboratory of microbiological and clinical diagnostic tests		Federal State Budgetary Institution “Centre for Strategic Planning and Management of Biomedical Health Risks” of the Federal Medical Biological Agency, Laboratory for advanced molecular diagnostics of human diseases.	119121, Moscow, Russia, Pogodinskaya str. 10	LQ-22173_S65/2022
123333	csp_omicron.fasta	hCoV-19/Russia/MOW-CSP-LQ-22180_S66/2022	betacoronavirus	Original	2022-01-21	Europe/Russia/Moscow/Moscow	Human	unknown	unknown	unknown	Illumina NextSeq	bwa mapping + consensus		Chief Federal State Budgetary Healthcare Institution “Centre of Hygiene and Epidemiology” of the Federal Medical Biological Agency, Central laboratory of microbiological and clinical diagnostic tests		Federal State Budgetary Institution “Centre for Strategic Planning and Management of Biomedical Health Risks” of the Federal Medical Biological Agency, Laboratory for advanced molecular diagnostics of human diseases.	119121, Moscow, Russia, Pogodinskaya str. 10	LQ-22180_S66/2022
123333	csp_omicron.fasta	hCoV-19/Russia/MOW-CSP-LQ-22181_S67/2022	betacoronavirus	Original	2022-01-21	Europe/Russia/Moscow/Moscow	Human	unknown	unknown	unknown	Illumina NextSeq	bwa mapping + consensus		Chief Federal State Budgetary Healthcare Institution “Centre of Hygiene and Epidemiology” of the Federal Medical Biological Agency, Central laboratory of microbiological and clinical diagnostic tests		Federal State Budgetary Institution “Centre for Strategic Planning and Management of Biomedical Health Risks” of the Federal Medical Biological Agency, Laboratory for advanced molecular diagnostics of human diseases.	119121, Moscow, Russia, Pogodinskaya str. 10	LQ-22181_S67/2022
123333	csp_omicron.fasta	hCoV-19/Russia/MOW-CSP-LQ-22183_S68/2022	betacoronavirus	Original	2022-01-21	Europe/Russia/Moscow/Moscow	Human	unknown	unknown	unknown	Illumina NextSeq	bwa mapping + consensus		Chief Federal State Budgetary Healthcare Institution “Centre of Hygiene and Epidemiology” of the Federal Medical Biological Agency, Central laboratory of microbiological and clinical diagnostic tests		Federal State Budgetary Institution “Centre for Strategic Planning and Management of Biomedical Health Risks” of the Federal Medical Biological Agency, Laboratory for advanced molecular diagnostics of human diseases.	119121, Moscow, Russia, Pogodinskaya str. 10	LQ-22183_S68/2022
123333	csp_omicron.fasta	hCoV-19/Russia/MOW-CSP-LQ-22201_S227/2022	betacoronavirus	Original	2022-01-21	Europe/Russia/Moscow/Moscow	Human	unknown	unknown	unknown	Illumina NextSeq	bwa mapping + consensus		Chief Federal State Budgetary Healthcare Institution “Centre of Hygiene and Epidemiology” of the Federal Medical Biological Agency, Central laboratory of microbiological and clinical diagnostic tests		Federal State Budgetary Institution “Centre for Strategic Planning and Management of Biomedical Health Risks” of the Federal Medical Biological Agency, Laboratory for advanced molecular diagnostics of human diseases.	119121, Moscow, Russia, Pogodinskaya str. 10	LQ-22201_S227/2022
123333	csp_omicron.fasta	hCoV-19/Russia/MOW-CSP-LQ-22217_S69/2022	betacoronavirus	Original	2022-01-21	Europe/Russia/Moscow/Moscow	Human	unknown	unknown	unknown	Illumina NextSeq	bwa mapping + consensus		Chief Federal State Budgetary Healthcare Institution “Centre of Hygiene and Epidemiology” of the Federal Medical Biological Agency, Central laboratory of microbiological and clinical diagnostic tests		Federal State Budgetary Institution “Centre for Strategic Planning and Management of Biomedical Health Risks” of the Federal Medical Biological Agency, Laboratory for advanced molecular diagnostics of human diseases.	119121, Moscow, Russia, Pogodinskaya str. 10	LQ-22217_S69/2022
123333	csp_omicron.fasta	hCoV-19/Russia/MOW-CSP-LQ-22224_S70/2022	betacoronavirus	Original	2022-01-21	Europe/Russia/Moscow/Moscow	Human	unknown	unknown	unknown	Illumina NextSeq	bwa mapping + consensus		Chief Federal State Budgetary Healthcare Institution “Centre of Hygiene and Epidemiology” of the Federal Medical Biological Agency, Central laboratory of microbiological and clinical diagnostic tests		Federal State Budgetary Institution “Centre for Strategic Planning and Management of Biomedical Health Risks” of the Federal Medical Biological Agency, Laboratory for advanced molecular diagnostics of human diseases.	119121, Moscow, Russia, Pogodinskaya str. 10	LQ-22224_S70/2022
123333	csp_omicron.fasta	hCoV-19/Russia/MOW-CSP-LQ-22231_S71/2022	betacoronavirus	Original	2022-01-21	Europe/Russia/Moscow/Moscow	Human	unknown	unknown	unknown	Illumina NextSeq	bwa mapping + consensus		Chief Federal State Budgetary Healthcare Institution “Centre of Hygiene and Epidemiology” of the Federal Medical Biological Agency, Central laboratory of microbiological and clinical diagnostic tests		Federal State Budgetary Institution “Centre for Strategic Planning and Management of Biomedical Health Risks” of the Federal Medical Biological Agency, Laboratory for advanced molecular diagnostics of human diseases.	119121, Moscow, Russia, Pogodinskaya str. 10	LQ-22231_S71/2022
123333	csp_omicron.fasta	hCoV-19/Russia/MOW-CSP-LQ-22239_S72/2022	betacoronavirus	Original	2022-01-21	Europe/Russia/Moscow/Moscow	Human	unknown	unknown	unknown	Illumina NextSeq	bwa mapping + consensus		Chief Federal State Budgetary Healthcare Institution “Centre of Hygiene and Epidemiology” of the Federal Medical Biological Agency, Central laboratory of microbiological and clinical diagnostic tests		Federal State Budgetary Institution “Centre for Strategic Planning and Management of Biomedical Health Risks” of the Federal Medical Biological Agency, Laboratory for advanced molecular diagnostics of human diseases.	119121, Moscow, Russia, Pogodinskaya str. 10	LQ-22239_S72/2022
123333	csp_omicron.fasta	hCoV-19/Russia/MOW-CSP-LQ-22241_S73/2022	betacoronavirus	Original	2022-01-21	Europe/Russia/Moscow/Moscow	Human	unknown	unknown	unknown	Illumina NextSeq	bwa mapping + consensus		Chief Federal State Budgetary Healthcare Institution “Centre of Hygiene and Epidemiology” of the Federal Medical Biological Agency, Central laboratory of microbiological and clinical diagnostic tests		Federal State Budgetary Institution “Centre for Strategic Planning and Management of Biomedical Health Risks” of the Federal Medical Biological Agency, Laboratory for advanced molecular diagnostics of human diseases.	119121, Moscow, Russia, Pogodinskaya str. 10	LQ-22241_S73/2022
123333	csp_omicron.fasta	hCoV-19/Russia/MOW-CSP-LQ-22250_S74/2022	betacoronavirus	Original	2022-01-21	Europe/Russia/Moscow/Moscow	Human	unknown	unknown	unknown	Illumina NextSeq	bwa mapping + consensus		Chief Federal State Budgetary Healthcare Institution “Centre of Hygiene and Epidemiology” of the Federal Medical Biological Agency, Central laboratory of microbiological and clinical diagnostic tests		Federal State Budgetary Institution “Centre for Strategic Planning and Management of Biomedical Health Risks” of the Federal Medical Biological Agency, Laboratory for advanced molecular diagnostics of human diseases.	119121, Moscow, Russia, Pogodinskaya str. 10	LQ-22250_S74/2022
123333	csp_omicron.fasta	hCoV-19/Russia/MOW-CSP-LQ-22253_S75/2022	betacoronavirus	Original	2022-01-21	Europe/Russia/Moscow/Moscow	Human	unknown	unknown	unknown	Illumina NextSeq	bwa mapping + consensus		Chief Federal State Budgetary Healthcare Institution “Centre of Hygiene and Epidemiology” of the Federal Medical Biological Agency, Central laboratory of microbiological and clinical diagnostic tests		Federal State Budgetary Institution “Centre for Strategic Planning and Management of Biomedical Health Risks” of the Federal Medical Biological Agency, Laboratory for advanced molecular diagnostics of human diseases.	119121, Moscow, Russia, Pogodinskaya str. 10	LQ-22253_S75/2022
123333	csp_omicron.fasta	hCoV-19/Russia/MOW-CSP-LQ-22260_S76/2022	betacoronavirus	Original	2022-01-22	Europe/Russia/Moscow/Moscow	Human	unknown	unknown	unknown	Illumina NextSeq	bwa mapping + consensus		Chief Federal State Budgetary Healthcare Institution “Centre of Hygiene and Epidemiology” of the Federal Medical Biological Agency, Central laboratory of microbiological and clinical diagnostic tests		Federal State Budgetary Institution “Centre for Strategic Planning and Management of Biomedical Health Risks” of the Federal Medical Biological Agency, Laboratory for advanced molecular diagnostics of human diseases.	119121, Moscow, Russia, Pogodinskaya str. 10	LQ-22260_S76/2022
123333	csp_omicron.fasta	hCoV-19/Russia/MOW-CSP-LQ-22263_S77/2022	betacoronavirus	Original	2022-01-22	Europe/Russia/Moscow/Moscow	Human	unknown	unknown	unknown	Illumina NextSeq	bwa mapping + consensus		Chief Federal State Budgetary Healthcare Institution “Centre of Hygiene and Epidemiology” of the Federal Medical Biological Agency, Central laboratory of microbiological and clinical diagnostic tests		Federal State Budgetary Institution “Centre for Strategic Planning and Management of Biomedical Health Risks” of the Federal Medical Biological Agency, Laboratory for advanced molecular diagnostics of human diseases.	119121, Moscow, Russia, Pogodinskaya str. 10	LQ-22263_S77/2022
123333	csp_omicron.fasta	hCoV-19/Russia/MOW-CSP-LQ-22264_S78/2022	betacoronavirus	Original	2022-01-22	Europe/Russia/Moscow/Moscow	Human	unknown	unknown	unknown	Illumina NextSeq	bwa mapping + consensus		Chief Federal State Budgetary Healthcare Institution “Centre of Hygiene and Epidemiology” of the Federal Medical Biological Agency, Central laboratory of microbiological and clinical diagnostic tests		Federal State Budgetary Institution “Centre for Strategic Planning and Management of Biomedical Health Risks” of the Federal Medical Biological Agency, Laboratory for advanced molecular diagnostics of human diseases.	119121, Moscow, Russia, Pogodinskaya str. 10	LQ-22264_S78/2022
123333	csp_omicron.fasta	hCoV-19/Russia/MOW-CSP-LQ-22270_S79/2022	betacoronavirus	Original	2022-01-22	Europe/Russia/Moscow/Moscow	Human	unknown	unknown	unknown	Illumina NextSeq	bwa mapping + consensus		Chief Federal State Budgetary Healthcare Institution “Centre of Hygiene and Epidemiology” of the Federal Medical Biological Agency, Central laboratory of microbiological and clinical diagnostic tests		Federal State Budgetary Institution “Centre for Strategic Planning and Management of Biomedical Health Risks” of the Federal Medical Biological Agency, Laboratory for advanced molecular diagnostics of human diseases.	119121, Moscow, Russia, Pogodinskaya str. 10	LQ-22270_S79/2022
123333	csp_omicron.fasta	hCoV-19/Russia/MOW-CSP-LQ-22271_S80/2022	betacoronavirus	Original	2022-01-22	Europe/Russia/Moscow/Moscow	Human	unknown	unknown	unknown	Illumina NextSeq	bwa mapping + consensus		Chief Federal State Budgetary Healthcare Institution “Centre of Hygiene and Epidemiology” of the Federal Medical Biological Agency, Central laboratory of microbiological and clinical diagnostic tests		Federal State Budgetary Institution “Centre for Strategic Planning and Management of Biomedical Health Risks” of the Federal Medical Biological Agency, Laboratory for advanced molecular diagnostics of human diseases.	119121, Moscow, Russia, Pogodinskaya str. 10	LQ-22271_S80/2022
123333	csp_omicron.fasta	hCoV-19/Russia/MOW-CSP-LQ-22274_S81/2022	betacoronavirus	Original	2022-01-22	Europe/Russia/Moscow/Moscow	Human	unknown	unknown	unknown	Illumina NextSeq	bwa mapping + consensus		Chief Federal State Budgetary Healthcare Institution “Centre of Hygiene and Epidemiology” of the Federal Medical Biological Agency, Central laboratory of microbiological and clinical diagnostic tests		Federal State Budgetary Institution “Centre for Strategic Planning and Management of Biomedical Health Risks” of the Federal Medical Biological Agency, Laboratory for advanced molecular diagnostics of human diseases.	119121, Moscow, Russia, Pogodinskaya str. 10	LQ-22274_S81/2022
123333	csp_omicron.fasta	hCoV-19/Russia/MOW-CSP-LQ-22277_S82/2022	betacoronavirus	Original	2022-01-22	Europe/Russia/Moscow/Moscow	Human	unknown	unknown	unknown	Illumina NextSeq	bwa mapping + consensus		Chief Federal State Budgetary Healthcare Institution “Centre of Hygiene and Epidemiology” of the Federal Medical Biological Agency, Central laboratory of microbiological and clinical diagnostic tests		Federal State Budgetary Institution “Centre for Strategic Planning and Management of Biomedical Health Risks” of the Federal Medical Biological Agency, Laboratory for advanced molecular diagnostics of human diseases.	119121, Moscow, Russia, Pogodinskaya str. 10	LQ-22277_S82/2022
123333	csp_omicron.fasta	hCoV-19/Russia/MOW-CSP-LQ-22280_S83/2022	betacoronavirus	Original	2022-01-22	Europe/Russia/Moscow/Moscow	Human	unknown	unknown	unknown	Illumina NextSeq	bwa mapping + consensus		Chief Federal State Budgetary Healthcare Institution “Centre of Hygiene and Epidemiology” of the Federal Medical Biological Agency, Central laboratory of microbiological and clinical diagnostic tests		Federal State Budgetary Institution “Centre for Strategic Planning and Management of Biomedical Health Risks” of the Federal Medical Biological Agency, Laboratory for advanced molecular diagnostics of human diseases.	119121, Moscow, Russia, Pogodinskaya str. 10	LQ-22280_S83/2022
123333	csp_omicron.fasta	hCoV-19/Russia/MOW-CSP-LQ-22284_S84/2022	betacoronavirus	Original	2022-01-22	Europe/Russia/Moscow/Moscow	Human	unknown	unknown	unknown	Illumina NextSeq	bwa mapping + consensus		Chief Federal State Budgetary Healthcare Institution “Centre of Hygiene and Epidemiology” of the Federal Medical Biological Agency, Central laboratory of microbiological and clinical diagnostic tests		Federal State Budgetary Institution “Centre for Strategic Planning and Management of Biomedical Health Risks” of the Federal Medical Biological Agency, Laboratory for advanced molecular diagnostics of human diseases.	119121, Moscow, Russia, Pogodinskaya str. 10	LQ-22284_S84/2022
123333	csp_omicron.fasta	hCoV-19/Russia/MOW-CSP-LQ-22297_S85/2022	betacoronavirus	Original	2022-01-22	Europe/Russia/Moscow/Moscow	Human	unknown	unknown	unknown	Illumina NextSeq	bwa mapping + consensus		Chief Federal State Budgetary Healthcare Institution “Centre of Hygiene and Epidemiology” of the Federal Medical Biological Agency, Central laboratory of microbiological and clinical diagnostic tests		Federal State Budgetary Institution “Centre for Strategic Planning and Management of Biomedical Health Risks” of the Federal Medical Biological Agency, Laboratory for advanced molecular diagnostics of human diseases.	119121, Moscow, Russia, Pogodinskaya str. 10	LQ-22297_S85/2022
123333	csp_omicron.fasta	hCoV-19/Russia/MOW-CSP-LQ-22300_S86/2022	betacoronavirus	Original	2022-01-22	Europe/Russia/Moscow/Moscow	Human	unknown	unknown	unknown	Illumina NextSeq	bwa mapping + consensus		Chief Federal State Budgetary Healthcare Institution “Centre of Hygiene and Epidemiology” of the Federal Medical Biological Agency, Central laboratory of microbiological and clinical diagnostic tests		Federal State Budgetary Institution “Centre for Strategic Planning and Management of Biomedical Health Risks” of the Federal Medical Biological Agency, Laboratory for advanced molecular diagnostics of human diseases.	119121, Moscow, Russia, Pogodinskaya str. 10	LQ-22300_S86/2022
123333	csp_omicron.fasta	hCoV-19/Russia/MOW-CSP-LQ-22302_S87/2022	betacoronavirus	Original	2022-01-22	Europe/Russia/Moscow/Moscow	Human	unknown	unknown	unknown	Illumina NextSeq	bwa mapping + consensus		Chief Federal State Budgetary Healthcare Institution “Centre of Hygiene and Epidemiology” of the Federal Medical Biological Agency, Central laboratory of microbiological and clinical diagnostic tests		Federal State Budgetary Institution “Centre for Strategic Planning and Management of Biomedical Health Risks” of the Federal Medical Biological Agency, Laboratory for advanced molecular diagnostics of human diseases.	119121, Moscow, Russia, Pogodinskaya str. 10	LQ-22302_S87/2022
123333	csp_omicron.fasta	hCoV-19/Russia/MOW-CSP-LQ-22309_S88/2022	betacoronavirus	Original	2022-01-22	Europe/Russia/Moscow/Moscow	Human	unknown	unknown	unknown	Illumina NextSeq	bwa mapping + consensus		Chief Federal State Budgetary Healthcare Institution “Centre of Hygiene and Epidemiology” of the Federal Medical Biological Agency, Central laboratory of microbiological and clinical diagnostic tests		Federal State Budgetary Institution “Centre for Strategic Planning and Management of Biomedical Health Risks” of the Federal Medical Biological Agency, Laboratory for advanced molecular diagnostics of human diseases.	119121, Moscow, Russia, Pogodinskaya str. 10	LQ-22309_S88/2022
123333	csp_omicron.fasta	hCoV-19/Russia/MOW-CSP-LQ-22314_S89/2022	betacoronavirus	Original	2022-01-22	Europe/Russia/Moscow/Moscow	Human	unknown	unknown	unknown	Illumina NextSeq	bwa mapping + consensus		Chief Federal State Budgetary Healthcare Institution “Centre of Hygiene and Epidemiology” of the Federal Medical Biological Agency, Central laboratory of microbiological and clinical diagnostic tests		Federal State Budgetary Institution “Centre for Strategic Planning and Management of Biomedical Health Risks” of the Federal Medical Biological Agency, Laboratory for advanced molecular diagnostics of human diseases.	119121, Moscow, Russia, Pogodinskaya str. 10	LQ-22314_S89/2022
123333	csp_omicron.fasta	hCoV-19/Russia/MOW-CSP-LQ-22316_S90/2022	betacoronavirus	Original	2022-01-22	Europe/Russia/Moscow/Moscow	Human	unknown	unknown	unknown	Illumina NextSeq	bwa mapping + consensus		Chief Federal State Budgetary Healthcare Institution “Centre of Hygiene and Epidemiology” of the Federal Medical Biological Agency, Central laboratory of microbiological and clinical diagnostic tests		Federal State Budgetary Institution “Centre for Strategic Planning and Management of Biomedical Health Risks” of the Federal Medical Biological Agency, Laboratory for advanced molecular diagnostics of human diseases.	119121, Moscow, Russia, Pogodinskaya str. 10	LQ-22316_S90/2022
123333	csp_omicron.fasta	hCoV-19/Russia/MOW-CSP-LQ-22321_S91/2022	betacoronavirus	Original	2022-01-22	Europe/Russia/Moscow/Moscow	Human	unknown	unknown	unknown	Illumina NextSeq	bwa mapping + consensus		Chief Federal State Budgetary Healthcare Institution “Centre of Hygiene and Epidemiology” of the Federal Medical Biological Agency, Central laboratory of microbiological and clinical diagnostic tests		Federal State Budgetary Institution “Centre for Strategic Planning and Management of Biomedical Health Risks” of the Federal Medical Biological Agency, Laboratory for advanced molecular diagnostics of human diseases.	119121, Moscow, Russia, Pogodinskaya str. 10	LQ-22321_S91/2022
123333	csp_omicron.fasta	hCoV-19/Russia/MOW-CSP-LQ-22324_S241/2022	betacoronavirus	Original	2022-01-22	Europe/Russia/Moscow/Moscow	Human	unknown	unknown	unknown	Illumina NextSeq	bwa mapping + consensus		Chief Federal State Budgetary Healthcare Institution “Centre of Hygiene and Epidemiology” of the Federal Medical Biological Agency, Central laboratory of microbiological and clinical diagnostic tests		Federal State Budgetary Institution “Centre for Strategic Planning and Management of Biomedical Health Risks” of the Federal Medical Biological Agency, Laboratory for advanced molecular diagnostics of human diseases.	119121, Moscow, Russia, Pogodinskaya str. 10	LQ-22324_S241/2022
123333	csp_omicron.fasta	hCoV-19/Russia/MOW-CSP-LQ-22327_S92/2022	betacoronavirus	Original	2022-01-22	Europe/Russia/Moscow/Moscow	Human	unknown	unknown	unknown	Illumina NextSeq	bwa mapping + consensus		Chief Federal State Budgetary Healthcare Institution “Centre of Hygiene and Epidemiology” of the Federal Medical Biological Agency, Central laboratory of microbiological and clinical diagnostic tests		Federal State Budgetary Institution “Centre for Strategic Planning and Management of Biomedical Health Risks” of the Federal Medical Biological Agency, Laboratory for advanced molecular diagnostics of human diseases.	119121, Moscow, Russia, Pogodinskaya str. 10	LQ-22327_S92/2022
123333	csp_omicron.fasta	hCoV-19/Russia/MOW-CSP-LQ-22331_S93/2022	betacoronavirus	Original	2022-01-22	Europe/Russia/Moscow/Moscow	Human	unknown	unknown	unknown	Illumina NextSeq	bwa mapping + consensus		Chief Federal State Budgetary Healthcare Institution “Centre of Hygiene and Epidemiology” of the Federal Medical Biological Agency, Central laboratory of microbiological and clinical diagnostic tests		Federal State Budgetary Institution “Centre for Strategic Planning and Management of Biomedical Health Risks” of the Federal Medical Biological Agency, Laboratory for advanced molecular diagnostics of human diseases.	119121, Moscow, Russia, Pogodinskaya str. 10	LQ-22331_S93/2022
123333	csp_omicron.fasta	hCoV-19/Russia/MOW-CSP-LQ-22334_S94/2022	betacoronavirus	Original	2022-01-22	Europe/Russia/Moscow/Moscow	Human	unknown	unknown	unknown	Illumina NextSeq	bwa mapping + consensus		Chief Federal State Budgetary Healthcare Institution “Centre of Hygiene and Epidemiology” of the Federal Medical Biological Agency, Central laboratory of microbiological and clinical diagnostic tests		Federal State Budgetary Institution “Centre for Strategic Planning and Management of Biomedical Health Risks” of the Federal Medical Biological Agency, Laboratory for advanced molecular diagnostics of human diseases.	119121, Moscow, Russia, Pogodinskaya str. 10	LQ-22334_S94/2022
123333	csp_omicron.fasta	hCoV-19/Russia/MOW-CSP-LQ-22336_S243/2022	betacoronavirus	Original	2022-01-22	Europe/Russia/Moscow/Moscow	Human	unknown	unknown	unknown	Illumina NextSeq	bwa mapping + consensus		Chief Federal State Budgetary Healthcare Institution “Centre of Hygiene and Epidemiology” of the Federal Medical Biological Agency, Central laboratory of microbiological and clinical diagnostic tests		Federal State Budgetary Institution “Centre for Strategic Planning and Management of Biomedical Health Risks” of the Federal Medical Biological Agency, Laboratory for advanced molecular diagnostics of human diseases.	119121, Moscow, Russia, Pogodinskaya str. 10	LQ-22336_S243/2022
123333	csp_omicron.fasta	hCoV-19/Russia/MOW-CSP-LQ-22345_S95/2022	betacoronavirus	Original	2022-01-22	Europe/Russia/Moscow/Moscow	Human	unknown	unknown	unknown	Illumina NextSeq	bwa mapping + consensus		Chief Federal State Budgetary Healthcare Institution “Centre of Hygiene and Epidemiology” of the Federal Medical Biological Agency, Central laboratory of microbiological and clinical diagnostic tests		Federal State Budgetary Institution “Centre for Strategic Planning and Management of Biomedical Health Risks” of the Federal Medical Biological Agency, Laboratory for advanced molecular diagnostics of human diseases.	119121, Moscow, Russia, Pogodinskaya str. 10	LQ-22345_S95/2022
123333	csp_omicron.fasta	hCoV-19/Russia/MOW-CSP-LQ-22347_S96/2022	betacoronavirus	Original	2022-01-22	Europe/Russia/Moscow/Moscow	Human	unknown	unknown	unknown	Illumina NextSeq	bwa mapping + consensus		Chief Federal State Budgetary Healthcare Institution “Centre of Hygiene and Epidemiology” of the Federal Medical Biological Agency, Central laboratory of microbiological and clinical diagnostic tests		Federal State Budgetary Institution “Centre for Strategic Planning and Management of Biomedical Health Risks” of the Federal Medical Biological Agency, Laboratory for advanced molecular diagnostics of human diseases.	119121, Moscow, Russia, Pogodinskaya str. 10	LQ-22347_S96/2022
123333	csp_omicron.fasta	hCoV-19/Russia/MOW-CSP-LQ-22348_S97/2022	betacoronavirus	Original	2022-01-22	Europe/Russia/Moscow/Moscow	Human	unknown	unknown	unknown	Illumina NextSeq	bwa mapping + consensus		Chief Federal State Budgetary Healthcare Institution “Centre of Hygiene and Epidemiology” of the Federal Medical Biological Agency, Central laboratory of microbiological and clinical diagnostic tests		Federal State Budgetary Institution “Centre for Strategic Planning and Management of Biomedical Health Risks” of the Federal Medical Biological Agency, Laboratory for advanced molecular diagnostics of human diseases.	119121, Moscow, Russia, Pogodinskaya str. 10	LQ-22348_S97/2022
123333	csp_omicron.fasta	hCoV-19/Russia/MOW-CSP-LQ-22351_S98/2022	betacoronavirus	Original	2022-01-22	Europe/Russia/Moscow/Moscow	Human	unknown	unknown	unknown	Illumina NextSeq	bwa mapping + consensus		Chief Federal State Budgetary Healthcare Institution “Centre of Hygiene and Epidemiology” of the Federal Medical Biological Agency, Central laboratory of microbiological and clinical diagnostic tests		Federal State Budgetary Institution “Centre for Strategic Planning and Management of Biomedical Health Risks” of the Federal Medical Biological Agency, Laboratory for advanced molecular diagnostics of human diseases.	119121, Moscow, Russia, Pogodinskaya str. 10	LQ-22351_S98/2022
123333	csp_omicron.fasta	hCoV-19/Russia/MOW-CSP-LQ-22354_S99/2022	betacoronavirus	Original	2022-01-22	Europe/Russia/Moscow/Moscow	Human	unknown	unknown	unknown	Illumina NextSeq	bwa mapping + consensus		Chief Federal State Budgetary Healthcare Institution “Centre of Hygiene and Epidemiology” of the Federal Medical Biological Agency, Central laboratory of microbiological and clinical diagnostic tests		Federal State Budgetary Institution “Centre for Strategic Planning and Management of Biomedical Health Risks” of the Federal Medical Biological Agency, Laboratory for advanced molecular diagnostics of human diseases.	119121, Moscow, Russia, Pogodinskaya str. 10	LQ-22354_S99/2022
123333	csp_omicron.fasta	hCoV-19/Russia/MOW-CSP-LQ-22364_S100/2022	betacoronavirus	Original	2022-01-22	Europe/Russia/Moscow/Moscow	Human	unknown	unknown	unknown	Illumina NextSeq	bwa mapping + consensus		Chief Federal State Budgetary Healthcare Institution “Centre of Hygiene and Epidemiology” of the Federal Medical Biological Agency, Central laboratory of microbiological and clinical diagnostic tests		Federal State Budgetary Institution “Centre for Strategic Planning and Management of Biomedical Health Risks” of the Federal Medical Biological Agency, Laboratory for advanced molecular diagnostics of human diseases.	119121, Moscow, Russia, Pogodinskaya str. 10	LQ-22364_S100/2022
123333	csp_omicron.fasta	hCoV-19/Russia/MOW-CSP-LQ-22365_S101/2022	betacoronavirus	Original	2022-01-22	Europe/Russia/Moscow/Moscow	Human	unknown	unknown	unknown	Illumina NextSeq	bwa mapping + consensus		Chief Federal State Budgetary Healthcare Institution “Centre of Hygiene and Epidemiology” of the Federal Medical Biological Agency, Central laboratory of microbiological and clinical diagnostic tests		Federal State Budgetary Institution “Centre for Strategic Planning and Management of Biomedical Health Risks” of the Federal Medical Biological Agency, Laboratory for advanced molecular diagnostics of human diseases.	119121, Moscow, Russia, Pogodinskaya str. 10	LQ-22365_S101/2022
123333	csp_omicron.fasta	hCoV-19/Russia/MOW-CSP-LQ-22367_S102/2022	betacoronavirus	Original	2022-01-22	Europe/Russia/Moscow/Moscow	Human	unknown	unknown	unknown	Illumina NextSeq	bwa mapping + consensus		Chief Federal State Budgetary Healthcare Institution “Centre of Hygiene and Epidemiology” of the Federal Medical Biological Agency, Central laboratory of microbiological and clinical diagnostic tests		Federal State Budgetary Institution “Centre for Strategic Planning and Management of Biomedical Health Risks” of the Federal Medical Biological Agency, Laboratory for advanced molecular diagnostics of human diseases.	119121, Moscow, Russia, Pogodinskaya str. 10	LQ-22367_S102/2022
123333	csp_omicron.fasta	hCoV-19/Russia/MOW-CSP-LQ-22373_S103/2022	betacoronavirus	Original	2022-01-22	Europe/Russia/Moscow/Moscow	Human	unknown	unknown	unknown	Illumina NextSeq	bwa mapping + consensus		Chief Federal State Budgetary Healthcare Institution “Centre of Hygiene and Epidemiology” of the Federal Medical Biological Agency, Central laboratory of microbiological and clinical diagnostic tests		Federal State Budgetary Institution “Centre for Strategic Planning and Management of Biomedical Health Risks” of the Federal Medical Biological Agency, Laboratory for advanced molecular diagnostics of human diseases.	119121, Moscow, Russia, Pogodinskaya str. 10	LQ-22373_S103/2022
123333	csp_omicron.fasta	hCoV-19/Russia/MOW-CSP-LQ-22376_S104/2022	betacoronavirus	Original	2022-01-22	Europe/Russia/Moscow/Moscow	Human	unknown	unknown	unknown	Illumina NextSeq	bwa mapping + consensus		Chief Federal State Budgetary Healthcare Institution “Centre of Hygiene and Epidemiology” of the Federal Medical Biological Agency, Central laboratory of microbiological and clinical diagnostic tests		Federal State Budgetary Institution “Centre for Strategic Planning and Management of Biomedical Health Risks” of the Federal Medical Biological Agency, Laboratory for advanced molecular diagnostics of human diseases.	119121, Moscow, Russia, Pogodinskaya str. 10	LQ-22376_S104/2022
123333	csp_omicron.fasta	hCoV-19/Russia/MOW-CSP-LQ-22378_S105/2022	betacoronavirus	Original	2022-01-22	Europe/Russia/Moscow/Moscow	Human	unknown	unknown	unknown	Illumina NextSeq	bwa mapping + consensus		Chief Federal State Budgetary Healthcare Institution “Centre of Hygiene and Epidemiology” of the Federal Medical Biological Agency, Central laboratory of microbiological and clinical diagnostic tests		Federal State Budgetary Institution “Centre for Strategic Planning and Management of Biomedical Health Risks” of the Federal Medical Biological Agency, Laboratory for advanced molecular diagnostics of human diseases.	119121, Moscow, Russia, Pogodinskaya str. 10	LQ-22378_S105/2022
123333	csp_omicron.fasta	hCoV-19/Russia/MOW-CSP-LQ-22382_S106/2022	betacoronavirus	Original	2022-01-22	Europe/Russia/Moscow/Moscow	Human	unknown	unknown	unknown	Illumina NextSeq	bwa mapping + consensus		Chief Federal State Budgetary Healthcare Institution “Centre of Hygiene and Epidemiology” of the Federal Medical Biological Agency, Central laboratory of microbiological and clinical diagnostic tests		Federal State Budgetary Institution “Centre for Strategic Planning and Management of Biomedical Health Risks” of the Federal Medical Biological Agency, Laboratory for advanced molecular diagnostics of human diseases.	119121, Moscow, Russia, Pogodinskaya str. 10	LQ-22382_S106/2022
123333	csp_omicron.fasta	hCoV-19/Russia/MOW-CSP-LQ-22384_S107/2022	betacoronavirus	Original	2022-01-22	Europe/Russia/Moscow/Moscow	Human	unknown	unknown	unknown	Illumina NextSeq	bwa mapping + consensus		Chief Federal State Budgetary Healthcare Institution “Centre of Hygiene and Epidemiology” of the Federal Medical Biological Agency, Central laboratory of microbiological and clinical diagnostic tests		Federal State Budgetary Institution “Centre for Strategic Planning and Management of Biomedical Health Risks” of the Federal Medical Biological Agency, Laboratory for advanced molecular diagnostics of human diseases.	119121, Moscow, Russia, Pogodinskaya str. 10	LQ-22384_S107/2022
123333	csp_omicron.fasta	hCoV-19/Russia/MOW-CSP-LQ-22385_S108/2022	betacoronavirus	Original	2022-01-22	Europe/Russia/Moscow/Moscow	Human	unknown	unknown	unknown	Illumina NextSeq	bwa mapping + consensus		Chief Federal State Budgetary Healthcare Institution “Centre of Hygiene and Epidemiology” of the Federal Medical Biological Agency, Central laboratory of microbiological and clinical diagnostic tests		Federal State Budgetary Institution “Centre for Strategic Planning and Management of Biomedical Health Risks” of the Federal Medical Biological Agency, Laboratory for advanced molecular diagnostics of human diseases.	119121, Moscow, Russia, Pogodinskaya str. 10	LQ-22385_S108/2022
123333	csp_omicron.fasta	hCoV-19/Russia/MOW-CSP-LQ-22390_S110/2022	betacoronavirus	Original	2022-01-22	Europe/Russia/Moscow/Moscow	Human	unknown	unknown	unknown	Illumina NextSeq	bwa mapping + consensus		Chief Federal State Budgetary Healthcare Institution “Centre of Hygiene and Epidemiology” of the Federal Medical Biological Agency, Central laboratory of microbiological and clinical diagnostic tests		Federal State Budgetary Institution “Centre for Strategic Planning and Management of Biomedical Health Risks” of the Federal Medical Biological Agency, Laboratory for advanced molecular diagnostics of human diseases.	119121, Moscow, Russia, Pogodinskaya str. 10	LQ-22390_S110/2022
123333	csp_omicron.fasta	hCoV-19/Russia/MOW-CSP-LQ-22392_S111/2022	betacoronavirus	Original	2022-01-22	Europe/Russia/Moscow/Moscow	Human	unknown	unknown	unknown	Illumina NextSeq	bwa mapping + consensus		Chief Federal State Budgetary Healthcare Institution “Centre of Hygiene and Epidemiology” of the Federal Medical Biological Agency, Central laboratory of microbiological and clinical diagnostic tests		Federal State Budgetary Institution “Centre for Strategic Planning and Management of Biomedical Health Risks” of the Federal Medical Biological Agency, Laboratory for advanced molecular diagnostics of human diseases.	119121, Moscow, Russia, Pogodinskaya str. 10	LQ-22392_S111/2022
123333	csp_omicron.fasta	hCoV-19/Russia/MOW-CSP-LQ-22394_S112/2022	betacoronavirus	Original	2022-01-22	Europe/Russia/Moscow/Moscow	Human	unknown	unknown	unknown	Illumina NextSeq	bwa mapping + consensus		Chief Federal State Budgetary Healthcare Institution “Centre of Hygiene and Epidemiology” of the Federal Medical Biological Agency, Central laboratory of microbiological and clinical diagnostic tests		Federal State Budgetary Institution “Centre for Strategic Planning and Management of Biomedical Health Risks” of the Federal Medical Biological Agency, Laboratory for advanced molecular diagnostics of human diseases.	119121, Moscow, Russia, Pogodinskaya str. 10	LQ-22394_S112/2022
123333	csp_omicron.fasta	hCoV-19/Russia/MOW-CSP-LQ-22396_S113/2022	betacoronavirus	Original	2022-01-22	Europe/Russia/Moscow/Moscow	Human	unknown	unknown	unknown	Illumina NextSeq	bwa mapping + consensus		Chief Federal State Budgetary Healthcare Institution “Centre of Hygiene and Epidemiology” of the Federal Medical Biological Agency, Central laboratory of microbiological and clinical diagnostic tests		Federal State Budgetary Institution “Centre for Strategic Planning and Management of Biomedical Health Risks” of the Federal Medical Biological Agency, Laboratory for advanced molecular diagnostics of human diseases.	119121, Moscow, Russia, Pogodinskaya str. 10	LQ-22396_S113/2022
123333	csp_omicron.fasta	hCoV-19/Russia/MOW-CSP-LQ-22430_S120/2022	betacoronavirus	Original	2022-01-22	Europe/Russia/Moscow/Moscow	Human	unknown	unknown	unknown	Illumina NextSeq	bwa mapping + consensus		Chief Federal State Budgetary Healthcare Institution “Centre of Hygiene and Epidemiology” of the Federal Medical Biological Agency, Central laboratory of microbiological and clinical diagnostic tests		Federal State Budgetary Institution “Centre for Strategic Planning and Management of Biomedical Health Risks” of the Federal Medical Biological Agency, Laboratory for advanced molecular diagnostics of human diseases.	119121, Moscow, Russia, Pogodinskaya str. 10	LQ-22430_S120/2022
123333	csp_omicron.fasta	hCoV-19/Russia/MOW-CSP-LQ-22432_S121/2022	betacoronavirus	Original	2022-01-22	Europe/Russia/Moscow/Moscow	Human	unknown	unknown	unknown	Illumina NextSeq	bwa mapping + consensus		Chief Federal State Budgetary Healthcare Institution “Centre of Hygiene and Epidemiology” of the Federal Medical Biological Agency, Central laboratory of microbiological and clinical diagnostic tests		Federal State Budgetary Institution “Centre for Strategic Planning and Management of Biomedical Health Risks” of the Federal Medical Biological Agency, Laboratory for advanced molecular diagnostics of human diseases.	119121, Moscow, Russia, Pogodinskaya str. 10	LQ-22432_S121/2022
123333	csp_omicron.fasta	hCoV-19/Russia/MOW-CSP-LQ-22433_S122/2022	betacoronavirus	Original	2022-01-22	Europe/Russia/Moscow/Moscow	Human	unknown	unknown	unknown	Illumina NextSeq	bwa mapping + consensus		Chief Federal State Budgetary Healthcare Institution “Centre of Hygiene and Epidemiology” of the Federal Medical Biological Agency, Central laboratory of microbiological and clinical diagnostic tests		Federal State Budgetary Institution “Centre for Strategic Planning and Management of Biomedical Health Risks” of the Federal Medical Biological Agency, Laboratory for advanced molecular diagnostics of human diseases.	119121, Moscow, Russia, Pogodinskaya str. 10	LQ-22433_S122/2022
123333	csp_omicron.fasta	hCoV-19/Russia/MOW-CSP-LQ-22435_S123/2022	betacoronavirus	Original	2022-01-22	Europe/Russia/Moscow/Moscow	Human	unknown	unknown	unknown	Illumina NextSeq	bwa mapping + consensus		Chief Federal State Budgetary Healthcare Institution “Centre of Hygiene and Epidemiology” of the Federal Medical Biological Agency, Central laboratory of microbiological and clinical diagnostic tests		Federal State Budgetary Institution “Centre for Strategic Planning and Management of Biomedical Health Risks” of the Federal Medical Biological Agency, Laboratory for advanced molecular diagnostics of human diseases.	119121, Moscow, Russia, Pogodinskaya str. 10	LQ-22435_S123/2022
123333	csp_omicron.fasta	hCoV-19/Russia/MOW-CSP-LQ-22439_S124/2022	betacoronavirus	Original	2022-01-22	Europe/Russia/Moscow/Moscow	Human	unknown	unknown	unknown	Illumina NextSeq	bwa mapping + consensus		Chief Federal State Budgetary Healthcare Institution “Centre of Hygiene and Epidemiology” of the Federal Medical Biological Agency, Central laboratory of microbiological and clinical diagnostic tests		Federal State Budgetary Institution “Centre for Strategic Planning and Management of Biomedical Health Risks” of the Federal Medical Biological Agency, Laboratory for advanced molecular diagnostics of human diseases.	119121, Moscow, Russia, Pogodinskaya str. 10	LQ-22439_S124/2022
123333	csp_omicron.fasta	hCoV-19/Russia/MOW-CSP-LQ-22443_S125/2022	betacoronavirus	Original	2022-01-22	Europe/Russia/Moscow/Moscow	Human	unknown	unknown	unknown	Illumina NextSeq	bwa mapping + consensus		Chief Federal State Budgetary Healthcare Institution “Centre of Hygiene and Epidemiology” of the Federal Medical Biological Agency, Central laboratory of microbiological and clinical diagnostic tests		Federal State Budgetary Institution “Centre for Strategic Planning and Management of Biomedical Health Risks” of the Federal Medical Biological Agency, Laboratory for advanced molecular diagnostics of human diseases.	119121, Moscow, Russia, Pogodinskaya str. 10	LQ-22443_S125/2022
123333	csp_omicron.fasta	hCoV-19/Russia/MOW-CSP-LQ-22446_S127/2022	betacoronavirus	Original	2022-01-22	Europe/Russia/Moscow/Moscow	Human	unknown	unknown	unknown	Illumina NextSeq	bwa mapping + consensus		Chief Federal State Budgetary Healthcare Institution “Centre of Hygiene and Epidemiology” of the Federal Medical Biological Agency, Central laboratory of microbiological and clinical diagnostic tests		Federal State Budgetary Institution “Centre for Strategic Planning and Management of Biomedical Health Risks” of the Federal Medical Biological Agency, Laboratory for advanced molecular diagnostics of human diseases.	119121, Moscow, Russia, Pogodinskaya str. 10	LQ-22446_S127/2022
123333	csp_omicron.fasta	hCoV-19/Russia/MOW-CSP-LQ-22449_S128/2022	betacoronavirus	Original	2022-01-22	Europe/Russia/Moscow/Moscow	Human	unknown	unknown	unknown	Illumina NextSeq	bwa mapping + consensus		Chief Federal State Budgetary Healthcare Institution “Centre of Hygiene and Epidemiology” of the Federal Medical Biological Agency, Central laboratory of microbiological and clinical diagnostic tests		Federal State Budgetary Institution “Centre for Strategic Planning and Management of Biomedical Health Risks” of the Federal Medical Biological Agency, Laboratory for advanced molecular diagnostics of human diseases.	119121, Moscow, Russia, Pogodinskaya str. 10	LQ-22449_S128/2022
123333	csp_omicron.fasta	hCoV-19/Russia/MOW-CSP-LQ-22452_S129/2022	betacoronavirus	Original	2022-01-23	Europe/Russia/Moscow/Moscow	Human	unknown	unknown	unknown	Illumina NextSeq	bwa mapping + consensus		Chief Federal State Budgetary Healthcare Institution “Centre of Hygiene and Epidemiology” of the Federal Medical Biological Agency, Central laboratory of microbiological and clinical diagnostic tests		Federal State Budgetary Institution “Centre for Strategic Planning and Management of Biomedical Health Risks” of the Federal Medical Biological Agency, Laboratory for advanced molecular diagnostics of human diseases.	119121, Moscow, Russia, Pogodinskaya str. 10	LQ-22452_S129/2022
123333	csp_omicron.fasta	hCoV-19/Russia/MOW-CSP-LQ-22466_S130/2022	betacoronavirus	Original	2022-01-23	Europe/Russia/Moscow/Moscow	Human	unknown	unknown	unknown	Illumina NextSeq	bwa mapping + consensus		Chief Federal State Budgetary Healthcare Institution “Centre of Hygiene and Epidemiology” of the Federal Medical Biological Agency, Central laboratory of microbiological and clinical diagnostic tests		Federal State Budgetary Institution “Centre for Strategic Planning and Management of Biomedical Health Risks” of the Federal Medical Biological Agency, Laboratory for advanced molecular diagnostics of human diseases.	119121, Moscow, Russia, Pogodinskaya str. 10	LQ-22466_S130/2022
123333	csp_omicron.fasta	hCoV-19/Russia/MOW-CSP-LQ-22470_S193/2022	betacoronavirus	Original	2022-01-23	Europe/Russia/Moscow/Moscow	Human	unknown	unknown	unknown	Illumina NextSeq	bwa mapping + consensus		Chief Federal State Budgetary Healthcare Institution “Centre of Hygiene and Epidemiology” of the Federal Medical Biological Agency, Central laboratory of microbiological and clinical diagnostic tests		Federal State Budgetary Institution “Centre for Strategic Planning and Management of Biomedical Health Risks” of the Federal Medical Biological Agency, Laboratory for advanced molecular diagnostics of human diseases.	119121, Moscow, Russia, Pogodinskaya str. 10	LQ-22470_S193/2022
123333	csp_omicron.fasta	hCoV-19/Russia/MOW-CSP-LQ-22477_S131/2022	betacoronavirus	Original	2022-01-23	Europe/Russia/Moscow/Moscow	Human	unknown	unknown	unknown	Illumina NextSeq	bwa mapping + consensus		Chief Federal State Budgetary Healthcare Institution “Centre of Hygiene and Epidemiology” of the Federal Medical Biological Agency, Central laboratory of microbiological and clinical diagnostic tests		Federal State Budgetary Institution “Centre for Strategic Planning and Management of Biomedical Health Risks” of the Federal Medical Biological Agency, Laboratory for advanced molecular diagnostics of human diseases.	119121, Moscow, Russia, Pogodinskaya str. 10	LQ-22477_S131/2022
123333	csp_omicron.fasta	hCoV-19/Russia/MOW-CSP-LQ-22481_S132/2022	betacoronavirus	Original	2022-01-23	Europe/Russia/Moscow/Moscow	Human	unknown	unknown	unknown	Illumina NextSeq	bwa mapping + consensus		Chief Federal State Budgetary Healthcare Institution “Centre of Hygiene and Epidemiology” of the Federal Medical Biological Agency, Central laboratory of microbiological and clinical diagnostic tests		Federal State Budgetary Institution “Centre for Strategic Planning and Management of Biomedical Health Risks” of the Federal Medical Biological Agency, Laboratory for advanced molecular diagnostics of human diseases.	119121, Moscow, Russia, Pogodinskaya str. 10	LQ-22481_S132/2022
123333	csp_omicron.fasta	hCoV-19/Russia/MOW-CSP-LQ-22483_S133/2022	betacoronavirus	Original	2022-01-23	Europe/Russia/Moscow/Moscow	Human	unknown	unknown	unknown	Illumina NextSeq	bwa mapping + consensus		Chief Federal State Budgetary Healthcare Institution “Centre of Hygiene and Epidemiology” of the Federal Medical Biological Agency, Central laboratory of microbiological and clinical diagnostic tests		Federal State Budgetary Institution “Centre for Strategic Planning and Management of Biomedical Health Risks” of the Federal Medical Biological Agency, Laboratory for advanced molecular diagnostics of human diseases.	119121, Moscow, Russia, Pogodinskaya str. 10	LQ-22483_S133/2022
123333	csp_omicron.fasta	hCoV-19/Russia/MOW-CSP-LQ-22484_S134/2022	betacoronavirus	Original	2022-01-23	Europe/Russia/Moscow/Moscow	Human	unknown	unknown	unknown	Illumina NextSeq	bwa mapping + consensus		Chief Federal State Budgetary Healthcare Institution “Centre of Hygiene and Epidemiology” of the Federal Medical Biological Agency, Central laboratory of microbiological and clinical diagnostic tests		Federal State Budgetary Institution “Centre for Strategic Planning and Management of Biomedical Health Risks” of the Federal Medical Biological Agency, Laboratory for advanced molecular diagnostics of human diseases.	119121, Moscow, Russia, Pogodinskaya str. 10	LQ-22484_S134/2022
123333	csp_omicron.fasta	hCoV-19/Russia/MOW-CSP-LQ-22494_S135/2022	betacoronavirus	Original	2022-01-23	Europe/Russia/Moscow/Moscow	Human	unknown	unknown	unknown	Illumina NextSeq	bwa mapping + consensus		Chief Federal State Budgetary Healthcare Institution “Centre of Hygiene and Epidemiology” of the Federal Medical Biological Agency, Central laboratory of microbiological and clinical diagnostic tests		Federal State Budgetary Institution “Centre for Strategic Planning and Management of Biomedical Health Risks” of the Federal Medical Biological Agency, Laboratory for advanced molecular diagnostics of human diseases.	119121, Moscow, Russia, Pogodinskaya str. 10	LQ-22494_S135/2022
123333	csp_omicron.fasta	hCoV-19/Russia/MOW-CSP-LQ-22506_S194/2022	betacoronavirus	Original	2022-01-23	Europe/Russia/Moscow/Moscow	Human	unknown	unknown	unknown	Illumina NextSeq	bwa mapping + consensus		Chief Federal State Budgetary Healthcare Institution “Centre of Hygiene and Epidemiology” of the Federal Medical Biological Agency, Central laboratory of microbiological and clinical diagnostic tests		Federal State Budgetary Institution “Centre for Strategic Planning and Management of Biomedical Health Risks” of the Federal Medical Biological Agency, Laboratory for advanced molecular diagnostics of human diseases.	119121, Moscow, Russia, Pogodinskaya str. 10	LQ-22506_S194/2022
123333	csp_omicron.fasta	hCoV-19/Russia/MOW-CSP-LQ-22519_S136/2022	betacoronavirus	Original	2022-01-23	Europe/Russia/Moscow/Moscow	Human	unknown	unknown	unknown	Illumina NextSeq	bwa mapping + consensus		Chief Federal State Budgetary Healthcare Institution “Centre of Hygiene and Epidemiology” of the Federal Medical Biological Agency, Central laboratory of microbiological and clinical diagnostic tests		Federal State Budgetary Institution “Centre for Strategic Planning and Management of Biomedical Health Risks” of the Federal Medical Biological Agency, Laboratory for advanced molecular diagnostics of human diseases.	119121, Moscow, Russia, Pogodinskaya str. 10	LQ-22519_S136/2022
123333	csp_omicron.fasta	hCoV-19/Russia/MOW-CSP-LQ-22521_S137/2022	betacoronavirus	Original	2022-01-23	Europe/Russia/Moscow/Moscow	Human	unknown	unknown	unknown	Illumina NextSeq	bwa mapping + consensus		Chief Federal State Budgetary Healthcare Institution “Centre of Hygiene and Epidemiology” of the Federal Medical Biological Agency, Central laboratory of microbiological and clinical diagnostic tests		Federal State Budgetary Institution “Centre for Strategic Planning and Management of Biomedical Health Risks” of the Federal Medical Biological Agency, Laboratory for advanced molecular diagnostics of human diseases.	119121, Moscow, Russia, Pogodinskaya str. 10	LQ-22521_S137/2022
123333	csp_omicron.fasta	hCoV-19/Russia/MOW-CSP-LQ-22526_S138/2022	betacoronavirus	Original	2022-01-23	Europe/Russia/Moscow/Moscow	Human	unknown	unknown	unknown	Illumina NextSeq	bwa mapping + consensus		Chief Federal State Budgetary Healthcare Institution “Centre of Hygiene and Epidemiology” of the Federal Medical Biological Agency, Central laboratory of microbiological and clinical diagnostic tests		Federal State Budgetary Institution “Centre for Strategic Planning and Management of Biomedical Health Risks” of the Federal Medical Biological Agency, Laboratory for advanced molecular diagnostics of human diseases.	119121, Moscow, Russia, Pogodinskaya str. 10	LQ-22526_S138/2022
123333	csp_omicron.fasta	hCoV-19/Russia/MOW-CSP-LQ-22527_S139/2022	betacoronavirus	Original	2022-01-23	Europe/Russia/Moscow/Moscow	Human	unknown	unknown	unknown	Illumina NextSeq	bwa mapping + consensus		Chief Federal State Budgetary Healthcare Institution “Centre of Hygiene and Epidemiology” of the Federal Medical Biological Agency, Central laboratory of microbiological and clinical diagnostic tests		Federal State Budgetary Institution “Centre for Strategic Planning and Management of Biomedical Health Risks” of the Federal Medical Biological Agency, Laboratory for advanced molecular diagnostics of human diseases.	119121, Moscow, Russia, Pogodinskaya str. 10	LQ-22527_S139/2022
123333	csp_omicron.fasta	hCoV-19/Russia/MOW-CSP-LQ-22528_S195/2022	betacoronavirus	Original	2022-01-23	Europe/Russia/Moscow/Moscow	Human	unknown	unknown	unknown	Illumina NextSeq	bwa mapping + consensus		Chief Federal State Budgetary Healthcare Institution “Centre of Hygiene and Epidemiology” of the Federal Medical Biological Agency, Central laboratory of microbiological and clinical diagnostic tests		Federal State Budgetary Institution “Centre for Strategic Planning and Management of Biomedical Health Risks” of the Federal Medical Biological Agency, Laboratory for advanced molecular diagnostics of human diseases.	119121, Moscow, Russia, Pogodinskaya str. 10	LQ-22528_S195/2022
123333	csp_omicron.fasta	hCoV-19/Russia/MOW-CSP-LQ-22530_S140/2022	betacoronavirus	Original	2022-01-23	Europe/Russia/Moscow/Moscow	Human	unknown	unknown	unknown	Illumina NextSeq	bwa mapping + consensus		Chief Federal State Budgetary Healthcare Institution “Centre of Hygiene and Epidemiology” of the Federal Medical Biological Agency, Central laboratory of microbiological and clinical diagnostic tests		Federal State Budgetary Institution “Centre for Strategic Planning and Management of Biomedical Health Risks” of the Federal Medical Biological Agency, Laboratory for advanced molecular diagnostics of human diseases.	119121, Moscow, Russia, Pogodinskaya str. 10	LQ-22530_S140/2022
123333	csp_omicron.fasta	hCoV-19/Russia/MOW-CSP-LQ-22536_S141/2022	betacoronavirus	Original	2022-01-23	Europe/Russia/Moscow/Moscow	Human	unknown	unknown	unknown	Illumina NextSeq	bwa mapping + consensus		Chief Federal State Budgetary Healthcare Institution “Centre of Hygiene and Epidemiology” of the Federal Medical Biological Agency, Central laboratory of microbiological and clinical diagnostic tests		Federal State Budgetary Institution “Centre for Strategic Planning and Management of Biomedical Health Risks” of the Federal Medical Biological Agency, Laboratory for advanced molecular diagnostics of human diseases.	119121, Moscow, Russia, Pogodinskaya str. 10	LQ-22536_S141/2022
123333	csp_omicron.fasta	hCoV-19/Russia/MOW-CSP-LQ-22537_S142/2022	betacoronavirus	Original	2022-01-23	Europe/Russia/Moscow/Moscow	Human	unknown	unknown	unknown	Illumina NextSeq	bwa mapping + consensus		Chief Federal State Budgetary Healthcare Institution “Centre of Hygiene and Epidemiology” of the Federal Medical Biological Agency, Central laboratory of microbiological and clinical diagnostic tests		Federal State Budgetary Institution “Centre for Strategic Planning and Management of Biomedical Health Risks” of the Federal Medical Biological Agency, Laboratory for advanced molecular diagnostics of human diseases.	119121, Moscow, Russia, Pogodinskaya str. 10	LQ-22537_S142/2022
123333	csp_omicron.fasta	hCoV-19/Russia/MOW-CSP-LQ-22538_S143/2022	betacoronavirus	Original	2022-01-23	Europe/Russia/Moscow/Moscow	Human	unknown	unknown	unknown	Illumina NextSeq	bwa mapping + consensus		Chief Federal State Budgetary Healthcare Institution “Centre of Hygiene and Epidemiology” of the Federal Medical Biological Agency, Central laboratory of microbiological and clinical diagnostic tests		Federal State Budgetary Institution “Centre for Strategic Planning and Management of Biomedical Health Risks” of the Federal Medical Biological Agency, Laboratory for advanced molecular diagnostics of human diseases.	119121, Moscow, Russia, Pogodinskaya str. 10	LQ-22538_S143/2022
123333	csp_omicron.fasta	hCoV-19/Russia/MOW-CSP-LQ-22543_S144/2022	betacoronavirus	Original	2022-01-23	Europe/Russia/Moscow/Moscow	Human	unknown	unknown	unknown	Illumina NextSeq	bwa mapping + consensus		Chief Federal State Budgetary Healthcare Institution “Centre of Hygiene and Epidemiology” of the Federal Medical Biological Agency, Central laboratory of microbiological and clinical diagnostic tests		Federal State Budgetary Institution “Centre for Strategic Planning and Management of Biomedical Health Risks” of the Federal Medical Biological Agency, Laboratory for advanced molecular diagnostics of human diseases.	119121, Moscow, Russia, Pogodinskaya str. 10	LQ-22543_S144/2022
123333	csp_omicron.fasta	hCoV-19/Russia/MOW-CSP-LQ-22545_S145/2022	betacoronavirus	Original	2022-01-23	Europe/Russia/Moscow/Moscow	Human	unknown	unknown	unknown	Illumina NextSeq	bwa mapping + consensus		Chief Federal State Budgetary Healthcare Institution “Centre of Hygiene and Epidemiology” of the Federal Medical Biological Agency, Central laboratory of microbiological and clinical diagnostic tests		Federal State Budgetary Institution “Centre for Strategic Planning and Management of Biomedical Health Risks” of the Federal Medical Biological Agency, Laboratory for advanced molecular diagnostics of human diseases.	119121, Moscow, Russia, Pogodinskaya str. 10	LQ-22545_S145/2022
123333	csp_omicron.fasta	hCoV-19/Russia/MOW-CSP-LQ-22546_S146/2022	betacoronavirus	Original	2022-01-23	Europe/Russia/Moscow/Moscow	Human	unknown	unknown	unknown	Illumina NextSeq	bwa mapping + consensus		Chief Federal State Budgetary Healthcare Institution “Centre of Hygiene and Epidemiology” of the Federal Medical Biological Agency, Central laboratory of microbiological and clinical diagnostic tests		Federal State Budgetary Institution “Centre for Strategic Planning and Management of Biomedical Health Risks” of the Federal Medical Biological Agency, Laboratory for advanced molecular diagnostics of human diseases.	119121, Moscow, Russia, Pogodinskaya str. 10	LQ-22546_S146/2022
123333	csp_omicron.fasta	hCoV-19/Russia/MOW-CSP-LQ-22553_S147/2022	betacoronavirus	Original	2022-01-23	Europe/Russia/Moscow/Moscow	Human	unknown	unknown	unknown	Illumina NextSeq	bwa mapping + consensus		Chief Federal State Budgetary Healthcare Institution “Centre of Hygiene and Epidemiology” of the Federal Medical Biological Agency, Central laboratory of microbiological and clinical diagnostic tests		Federal State Budgetary Institution “Centre for Strategic Planning and Management of Biomedical Health Risks” of the Federal Medical Biological Agency, Laboratory for advanced molecular diagnostics of human diseases.	119121, Moscow, Russia, Pogodinskaya str. 10	LQ-22553_S147/2022
123333	csp_omicron.fasta	hCoV-19/Russia/MOW-CSP-LQ-22554_S148/2022	betacoronavirus	Original	2022-01-23	Europe/Russia/Moscow/Moscow	Human	unknown	unknown	unknown	Illumina NextSeq	bwa mapping + consensus		Chief Federal State Budgetary Healthcare Institution “Centre of Hygiene and Epidemiology” of the Federal Medical Biological Agency, Central laboratory of microbiological and clinical diagnostic tests		Federal State Budgetary Institution “Centre for Strategic Planning and Management of Biomedical Health Risks” of the Federal Medical Biological Agency, Laboratory for advanced molecular diagnostics of human diseases.	119121, Moscow, Russia, Pogodinskaya str. 10	LQ-22554_S148/2022
123333	csp_omicron.fasta	hCoV-19/Russia/MOW-CSP-LQ-22559_S149/2022	betacoronavirus	Original	2022-01-23	Europe/Russia/Moscow/Moscow	Human	unknown	unknown	unknown	Illumina NextSeq	bwa mapping + consensus		Chief Federal State Budgetary Healthcare Institution “Centre of Hygiene and Epidemiology” of the Federal Medical Biological Agency, Central laboratory of microbiological and clinical diagnostic tests		Federal State Budgetary Institution “Centre for Strategic Planning and Management of Biomedical Health Risks” of the Federal Medical Biological Agency, Laboratory for advanced molecular diagnostics of human diseases.	119121, Moscow, Russia, Pogodinskaya str. 10	LQ-22559_S149/2022
123333	csp_omicron.fasta	hCoV-19/Russia/MOW-CSP-LQ-22561_S150/2022	betacoronavirus	Original	2022-01-23	Europe/Russia/Moscow/Moscow	Human	unknown	unknown	unknown	Illumina NextSeq	bwa mapping + consensus		Chief Federal State Budgetary Healthcare Institution “Centre of Hygiene and Epidemiology” of the Federal Medical Biological Agency, Central laboratory of microbiological and clinical diagnostic tests		Federal State Budgetary Institution “Centre for Strategic Planning and Management of Biomedical Health Risks” of the Federal Medical Biological Agency, Laboratory for advanced molecular diagnostics of human diseases.	119121, Moscow, Russia, Pogodinskaya str. 10	LQ-22561_S150/2022
123333	csp_omicron.fasta	hCoV-19/Russia/MOW-CSP-LQ-22571_S151/2022	betacoronavirus	Original	2022-01-23	Europe/Russia/Moscow/Moscow	Human	unknown	unknown	unknown	Illumina NextSeq	bwa mapping + consensus		Chief Federal State Budgetary Healthcare Institution “Centre of Hygiene and Epidemiology” of the Federal Medical Biological Agency, Central laboratory of microbiological and clinical diagnostic tests		Federal State Budgetary Institution “Centre for Strategic Planning and Management of Biomedical Health Risks” of the Federal Medical Biological Agency, Laboratory for advanced molecular diagnostics of human diseases.	119121, Moscow, Russia, Pogodinskaya str. 10	LQ-22571_S151/2022
123333	csp_omicron.fasta	hCoV-19/Russia/MOW-CSP-LQ-22572_S152/2022	betacoronavirus	Original	2022-01-23	Europe/Russia/Moscow/Moscow	Human	unknown	unknown	unknown	Illumina NextSeq	bwa mapping + consensus		Chief Federal State Budgetary Healthcare Institution “Centre of Hygiene and Epidemiology” of the Federal Medical Biological Agency, Central laboratory of microbiological and clinical diagnostic tests		Federal State Budgetary Institution “Centre for Strategic Planning and Management of Biomedical Health Risks” of the Federal Medical Biological Agency, Laboratory for advanced molecular diagnostics of human diseases.	119121, Moscow, Russia, Pogodinskaya str. 10	LQ-22572_S152/2022
123333	csp_omicron.fasta	hCoV-19/Russia/MOW-CSP-LQ-22576_S153/2022	betacoronavirus	Original	2022-01-23	Europe/Russia/Moscow/Moscow	Human	unknown	unknown	unknown	Illumina NextSeq	bwa mapping + consensus		Chief Federal State Budgetary Healthcare Institution “Centre of Hygiene and Epidemiology” of the Federal Medical Biological Agency, Central laboratory of microbiological and clinical diagnostic tests		Federal State Budgetary Institution “Centre for Strategic Planning and Management of Biomedical Health Risks” of the Federal Medical Biological Agency, Laboratory for advanced molecular diagnostics of human diseases.	119121, Moscow, Russia, Pogodinskaya str. 10	LQ-22576_S153/2022
123333	csp_omicron.fasta	hCoV-19/Russia/MOW-CSP-LQ-22596_S154/2022	betacoronavirus	Original	2022-01-23	Europe/Russia/Moscow/Moscow	Human	unknown	unknown	unknown	Illumina NextSeq	bwa mapping + consensus		Chief Federal State Budgetary Healthcare Institution “Centre of Hygiene and Epidemiology” of the Federal Medical Biological Agency, Central laboratory of microbiological and clinical diagnostic tests		Federal State Budgetary Institution “Centre for Strategic Planning and Management of Biomedical Health Risks” of the Federal Medical Biological Agency, Laboratory for advanced molecular diagnostics of human diseases.	119121, Moscow, Russia, Pogodinskaya str. 10	LQ-22596_S154/2022
123333	csp_omicron.fasta	hCoV-19/Russia/MOW-CSP-LQ-22603_S155/2022	betacoronavirus	Original	2022-01-23	Europe/Russia/Moscow/Moscow	Human	unknown	unknown	unknown	Illumina NextSeq	bwa mapping + consensus		Chief Federal State Budgetary Healthcare Institution “Centre of Hygiene and Epidemiology” of the Federal Medical Biological Agency, Central laboratory of microbiological and clinical diagnostic tests		Federal State Budgetary Institution “Centre for Strategic Planning and Management of Biomedical Health Risks” of the Federal Medical Biological Agency, Laboratory for advanced molecular diagnostics of human diseases.	119121, Moscow, Russia, Pogodinskaya str. 10	LQ-22603_S155/2022
123333	csp_omicron.fasta	hCoV-19/Russia/MOW-CSP-LQ-22605_S156/2022	betacoronavirus	Original	2022-01-23	Europe/Russia/Moscow/Moscow	Human	unknown	unknown	unknown	Illumina NextSeq	bwa mapping + consensus		Chief Federal State Budgetary Healthcare Institution “Centre of Hygiene and Epidemiology” of the Federal Medical Biological Agency, Central laboratory of microbiological and clinical diagnostic tests		Federal State Budgetary Institution “Centre for Strategic Planning and Management of Biomedical Health Risks” of the Federal Medical Biological Agency, Laboratory for advanced molecular diagnostics of human diseases.	119121, Moscow, Russia, Pogodinskaya str. 10	LQ-22605_S156/2022
123333	csp_omicron.fasta	hCoV-19/Russia/MOW-CSP-LQ-22609_S157/2022	betacoronavirus	Original	2022-01-23	Europe/Russia/Moscow/Moscow	Human	unknown	unknown	unknown	Illumina NextSeq	bwa mapping + consensus		Chief Federal State Budgetary Healthcare Institution “Centre of Hygiene and Epidemiology” of the Federal Medical Biological Agency, Central laboratory of microbiological and clinical diagnostic tests		Federal State Budgetary Institution “Centre for Strategic Planning and Management of Biomedical Health Risks” of the Federal Medical Biological Agency, Laboratory for advanced molecular diagnostics of human diseases.	119121, Moscow, Russia, Pogodinskaya str. 10	LQ-22609_S157/2022
123333	csp_omicron.fasta	hCoV-19/Russia/MOW-CSP-LQ-22626_S158/2022	betacoronavirus	Original	2022-01-23	Europe/Russia/Moscow/Moscow	Human	unknown	unknown	unknown	Illumina NextSeq	bwa mapping + consensus		Chief Federal State Budgetary Healthcare Institution “Centre of Hygiene and Epidemiology” of the Federal Medical Biological Agency, Central laboratory of microbiological and clinical diagnostic tests		Federal State Budgetary Institution “Centre for Strategic Planning and Management of Biomedical Health Risks” of the Federal Medical Biological Agency, Laboratory for advanced molecular diagnostics of human diseases.	119121, Moscow, Russia, Pogodinskaya str. 10	LQ-22626_S158/2022
123333	csp_omicron.fasta	hCoV-19/Russia/MOW-CSP-LQ-22628_S159/2022	betacoronavirus	Original	2022-01-23	Europe/Russia/Moscow/Moscow	Human	unknown	unknown	unknown	Illumina NextSeq	bwa mapping + consensus		Chief Federal State Budgetary Healthcare Institution “Centre of Hygiene and Epidemiology” of the Federal Medical Biological Agency, Central laboratory of microbiological and clinical diagnostic tests		Federal State Budgetary Institution “Centre for Strategic Planning and Management of Biomedical Health Risks” of the Federal Medical Biological Agency, Laboratory for advanced molecular diagnostics of human diseases.	119121, Moscow, Russia, Pogodinskaya str. 10	LQ-22628_S159/2022
123333	csp_omicron.fasta	hCoV-19/Russia/MOW-CSP-LQ-22633_S160/2022	betacoronavirus	Original	2022-01-23	Europe/Russia/Moscow/Moscow	Human	unknown	unknown	unknown	Illumina NextSeq	bwa mapping + consensus		Chief Federal State Budgetary Healthcare Institution “Centre of Hygiene and Epidemiology” of the Federal Medical Biological Agency, Central laboratory of microbiological and clinical diagnostic tests		Federal State Budgetary Institution “Centre for Strategic Planning and Management of Biomedical Health Risks” of the Federal Medical Biological Agency, Laboratory for advanced molecular diagnostics of human diseases.	119121, Moscow, Russia, Pogodinskaya str. 10	LQ-22633_S160/2022
123333	csp_omicron.fasta	hCoV-19/Russia/MOW-CSP-LQ-22635_S161/2022	betacoronavirus	Original	2022-01-23	Europe/Russia/Moscow/Moscow	Human	unknown	unknown	unknown	Illumina NextSeq	bwa mapping + consensus		Chief Federal State Budgetary Healthcare Institution “Centre of Hygiene and Epidemiology” of the Federal Medical Biological Agency, Central laboratory of microbiological and clinical diagnostic tests		Federal State Budgetary Institution “Centre for Strategic Planning and Management of Biomedical Health Risks” of the Federal Medical Biological Agency, Laboratory for advanced molecular diagnostics of human diseases.	119121, Moscow, Russia, Pogodinskaya str. 10	LQ-22635_S161/2022
123333	csp_omicron.fasta	hCoV-19/Russia/MOW-CSP-LQ-22641_S162/2022	betacoronavirus	Original	2022-01-23	Europe/Russia/Moscow/Moscow	Human	unknown	unknown	unknown	Illumina NextSeq	bwa mapping + consensus		Chief Federal State Budgetary Healthcare Institution “Centre of Hygiene and Epidemiology” of the Federal Medical Biological Agency, Central laboratory of microbiological and clinical diagnostic tests		Federal State Budgetary Institution “Centre for Strategic Planning and Management of Biomedical Health Risks” of the Federal Medical Biological Agency, Laboratory for advanced molecular diagnostics of human diseases.	119121, Moscow, Russia, Pogodinskaya str. 10	LQ-22641_S162/2022
123333	csp_omicron.fasta	hCoV-19/Russia/MOW-CSP-LQ-22642_S163/2022	betacoronavirus	Original	2022-01-23	Europe/Russia/Moscow/Moscow	Human	unknown	unknown	unknown	Illumina NextSeq	bwa mapping + consensus		Chief Federal State Budgetary Healthcare Institution “Centre of Hygiene and Epidemiology” of the Federal Medical Biological Agency, Central laboratory of microbiological and clinical diagnostic tests		Federal State Budgetary Institution “Centre for Strategic Planning and Management of Biomedical Health Risks” of the Federal Medical Biological Agency, Laboratory for advanced molecular diagnostics of human diseases.	119121, Moscow, Russia, Pogodinskaya str. 10	LQ-22642_S163/2022
123333	csp_omicron.fasta	hCoV-19/Russia/MOW-CSP-LQ-22646_S164/2022	betacoronavirus	Original	2022-01-23	Europe/Russia/Moscow/Moscow	Human	unknown	unknown	unknown	Illumina NextSeq	bwa mapping + consensus		Chief Federal State Budgetary Healthcare Institution “Centre of Hygiene and Epidemiology” of the Federal Medical Biological Agency, Central laboratory of microbiological and clinical diagnostic tests		Federal State Budgetary Institution “Centre for Strategic Planning and Management of Biomedical Health Risks” of the Federal Medical Biological Agency, Laboratory for advanced molecular diagnostics of human diseases.	119121, Moscow, Russia, Pogodinskaya str. 10	LQ-22646_S164/2022
123333	csp_omicron.fasta	hCoV-19/Russia/MOW-CSP-LQ-22654_S165/2022	betacoronavirus	Original	2022-01-23	Europe/Russia/Moscow/Moscow	Human	unknown	unknown	unknown	Illumina NextSeq	bwa mapping + consensus		Chief Federal State Budgetary Healthcare Institution “Centre of Hygiene and Epidemiology” of the Federal Medical Biological Agency, Central laboratory of microbiological and clinical diagnostic tests		Federal State Budgetary Institution “Centre for Strategic Planning and Management of Biomedical Health Risks” of the Federal Medical Biological Agency, Laboratory for advanced molecular diagnostics of human diseases.	119121, Moscow, Russia, Pogodinskaya str. 10	LQ-22654_S165/2022
123333	csp_omicron.fasta	hCoV-19/Russia/MOW-CSP-LQ-22655_S166/2022	betacoronavirus	Original	2022-01-23	Europe/Russia/Moscow/Moscow	Human	unknown	unknown	unknown	Illumina NextSeq	bwa mapping + consensus		Chief Federal State Budgetary Healthcare Institution “Centre of Hygiene and Epidemiology” of the Federal Medical Biological Agency, Central laboratory of microbiological and clinical diagnostic tests		Federal State Budgetary Institution “Centre for Strategic Planning and Management of Biomedical Health Risks” of the Federal Medical Biological Agency, Laboratory for advanced molecular diagnostics of human diseases.	119121, Moscow, Russia, Pogodinskaya str. 10	LQ-22655_S166/2022
123333	csp_omicron.fasta	hCoV-19/Russia/MOW-CSP-LQ-22656_S167/2022	betacoronavirus	Original	2022-01-23	Europe/Russia/Moscow/Moscow	Human	unknown	unknown	unknown	Illumina NextSeq	bwa mapping + consensus		Chief Federal State Budgetary Healthcare Institution “Centre of Hygiene and Epidemiology” of the Federal Medical Biological Agency, Central laboratory of microbiological and clinical diagnostic tests		Federal State Budgetary Institution “Centre for Strategic Planning and Management of Biomedical Health Risks” of the Federal Medical Biological Agency, Laboratory for advanced molecular diagnostics of human diseases.	119121, Moscow, Russia, Pogodinskaya str. 10	LQ-22656_S167/2022
123333	csp_omicron.fasta	hCoV-19/Russia/MOW-CSP-LQ-22657_S168/2022	betacoronavirus	Original	2022-01-23	Europe/Russia/Moscow/Moscow	Human	unknown	unknown	unknown	Illumina NextSeq	bwa mapping + consensus		Chief Federal State Budgetary Healthcare Institution “Centre of Hygiene and Epidemiology” of the Federal Medical Biological Agency, Central laboratory of microbiological and clinical diagnostic tests		Federal State Budgetary Institution “Centre for Strategic Planning and Management of Biomedical Health Risks” of the Federal Medical Biological Agency, Laboratory for advanced molecular diagnostics of human diseases.	119121, Moscow, Russia, Pogodinskaya str. 10	LQ-22657_S168/2022
123333	csp_omicron.fasta	hCoV-19/Russia/MOW-CSP-LQ-22659_S169/2022	betacoronavirus	Original	2022-01-23	Europe/Russia/Moscow/Moscow	Human	unknown	unknown	unknown	Illumina NextSeq	bwa mapping + consensus		Chief Federal State Budgetary Healthcare Institution “Centre of Hygiene and Epidemiology” of the Federal Medical Biological Agency, Central laboratory of microbiological and clinical diagnostic tests		Federal State Budgetary Institution “Centre for Strategic Planning and Management of Biomedical Health Risks” of the Federal Medical Biological Agency, Laboratory for advanced molecular diagnostics of human diseases.	119121, Moscow, Russia, Pogodinskaya str. 10	LQ-22659_S169/2022
123333	csp_omicron.fasta	hCoV-19/Russia/MOW-CSP-LQ-22664_S170/2022	betacoronavirus	Original	2022-01-23	Europe/Russia/Moscow/Moscow	Human	unknown	unknown	unknown	Illumina NextSeq	bwa mapping + consensus		Chief Federal State Budgetary Healthcare Institution “Centre of Hygiene and Epidemiology” of the Federal Medical Biological Agency, Central laboratory of microbiological and clinical diagnostic tests		Federal State Budgetary Institution “Centre for Strategic Planning and Management of Biomedical Health Risks” of the Federal Medical Biological Agency, Laboratory for advanced molecular diagnostics of human diseases.	119121, Moscow, Russia, Pogodinskaya str. 10	LQ-22664_S170/2022
123333	csp_omicron.fasta	hCoV-19/Russia/MOW-CSP-LQ-22665_S171/2022	betacoronavirus	Original	2022-01-23	Europe/Russia/Moscow/Moscow	Human	unknown	unknown	unknown	Illumina NextSeq	bwa mapping + consensus		Chief Federal State Budgetary Healthcare Institution “Centre of Hygiene and Epidemiology” of the Federal Medical Biological Agency, Central laboratory of microbiological and clinical diagnostic tests		Federal State Budgetary Institution “Centre for Strategic Planning and Management of Biomedical Health Risks” of the Federal Medical Biological Agency, Laboratory for advanced molecular diagnostics of human diseases.	119121, Moscow, Russia, Pogodinskaya str. 10	LQ-22665_S171/2022
123333	csp_omicron.fasta	hCoV-19/Russia/MOW-CSP-LQ-22666_S172/2022	betacoronavirus	Original	2022-01-23	Europe/Russia/Moscow/Moscow	Human	unknown	unknown	unknown	Illumina NextSeq	bwa mapping + consensus		Chief Federal State Budgetary Healthcare Institution “Centre of Hygiene and Epidemiology” of the Federal Medical Biological Agency, Central laboratory of microbiological and clinical diagnostic tests		Federal State Budgetary Institution “Centre for Strategic Planning and Management of Biomedical Health Risks” of the Federal Medical Biological Agency, Laboratory for advanced molecular diagnostics of human diseases.	119121, Moscow, Russia, Pogodinskaya str. 10	LQ-22666_S172/2022
123333	csp_omicron.fasta	hCoV-19/Russia/MOW-CSP-LQ-22667_S173/2022	betacoronavirus	Original	2022-01-23	Europe/Russia/Moscow/Moscow	Human	unknown	unknown	unknown	Illumina NextSeq	bwa mapping + consensus		Chief Federal State Budgetary Healthcare Institution “Centre of Hygiene and Epidemiology” of the Federal Medical Biological Agency, Central laboratory of microbiological and clinical diagnostic tests		Federal State Budgetary Institution “Centre for Strategic Planning and Management of Biomedical Health Risks” of the Federal Medical Biological Agency, Laboratory for advanced molecular diagnostics of human diseases.	119121, Moscow, Russia, Pogodinskaya str. 10	LQ-22667_S173/2022
123333	csp_omicron.fasta	hCoV-19/Russia/MOW-CSP-LQ-22668_S174/2022	betacoronavirus	Original	2022-01-23	Europe/Russia/Moscow/Moscow	Human	unknown	unknown	unknown	Illumina NextSeq	bwa mapping + consensus		Chief Federal State Budgetary Healthcare Institution “Centre of Hygiene and Epidemiology” of the Federal Medical Biological Agency, Central laboratory of microbiological and clinical diagnostic tests		Federal State Budgetary Institution “Centre for Strategic Planning and Management of Biomedical Health Risks” of the Federal Medical Biological Agency, Laboratory for advanced molecular diagnostics of human diseases.	119121, Moscow, Russia, Pogodinskaya str. 10	LQ-22668_S174/2022
123333	csp_omicron.fasta	hCoV-19/Russia/MOW-CSP-LQ-22670_S175/2022	betacoronavirus	Original	2022-01-23	Europe/Russia/Moscow/Moscow	Human	unknown	unknown	unknown	Illumina NextSeq	bwa mapping + consensus		Chief Federal State Budgetary Healthcare Institution “Centre of Hygiene and Epidemiology” of the Federal Medical Biological Agency, Central laboratory of microbiological and clinical diagnostic tests		Federal State Budgetary Institution “Centre for Strategic Planning and Management of Biomedical Health Risks” of the Federal Medical Biological Agency, Laboratory for advanced molecular diagnostics of human diseases.	119121, Moscow, Russia, Pogodinskaya str. 10	LQ-22670_S175/2022
123333	csp_omicron.fasta	hCoV-19/Russia/MOW-CSP-LQ-22672_S176/2022	betacoronavirus	Original	2022-01-23	Europe/Russia/Moscow/Moscow	Human	unknown	unknown	unknown	Illumina NextSeq	bwa mapping + consensus		Chief Federal State Budgetary Healthcare Institution “Centre of Hygiene and Epidemiology” of the Federal Medical Biological Agency, Central laboratory of microbiological and clinical diagnostic tests		Federal State Budgetary Institution “Centre for Strategic Planning and Management of Biomedical Health Risks” of the Federal Medical Biological Agency, Laboratory for advanced molecular diagnostics of human diseases.	119121, Moscow, Russia, Pogodinskaya str. 10	LQ-22672_S176/2022
123333	csp_omicron.fasta	hCoV-19/Russia/MOW-CSP-LQ-22674_S177/2022	betacoronavirus	Original	2022-01-23	Europe/Russia/Moscow/Moscow	Human	unknown	unknown	unknown	Illumina NextSeq	bwa mapping + consensus		Chief Federal State Budgetary Healthcare Institution “Centre of Hygiene and Epidemiology” of the Federal Medical Biological Agency, Central laboratory of microbiological and clinical diagnostic tests		Federal State Budgetary Institution “Centre for Strategic Planning and Management of Biomedical Health Risks” of the Federal Medical Biological Agency, Laboratory for advanced molecular diagnostics of human diseases.	119121, Moscow, Russia, Pogodinskaya str. 10	LQ-22674_S177/2022
123333	csp_omicron.fasta	hCoV-19/Russia/MOW-CSP-LQ-22682_S178/2022	betacoronavirus	Original	2022-01-23	Europe/Russia/Moscow/Moscow	Human	unknown	unknown	unknown	Illumina NextSeq	bwa mapping + consensus		Chief Federal State Budgetary Healthcare Institution “Centre of Hygiene and Epidemiology” of the Federal Medical Biological Agency, Central laboratory of microbiological and clinical diagnostic tests		Federal State Budgetary Institution “Centre for Strategic Planning and Management of Biomedical Health Risks” of the Federal Medical Biological Agency, Laboratory for advanced molecular diagnostics of human diseases.	119121, Moscow, Russia, Pogodinskaya str. 10	LQ-22682_S178/2022
123333	csp_omicron.fasta	hCoV-19/Russia/MOW-CSP-LQ-22685_S179/2022	betacoronavirus	Original	2022-01-23	Europe/Russia/Moscow/Moscow	Human	unknown	unknown	unknown	Illumina NextSeq	bwa mapping + consensus		Chief Federal State Budgetary Healthcare Institution “Centre of Hygiene and Epidemiology” of the Federal Medical Biological Agency, Central laboratory of microbiological and clinical diagnostic tests		Federal State Budgetary Institution “Centre for Strategic Planning and Management of Biomedical Health Risks” of the Federal Medical Biological Agency, Laboratory for advanced molecular diagnostics of human diseases.	119121, Moscow, Russia, Pogodinskaya str. 10	LQ-22685_S179/2022
123333	csp_omicron.fasta	hCoV-19/Russia/MOW-CSP-LQ-22692_S180/2022	betacoronavirus	Original	2022-01-23	Europe/Russia/Moscow/Moscow	Human	unknown	unknown	unknown	Illumina NextSeq	bwa mapping + consensus		Chief Federal State Budgetary Healthcare Institution “Centre of Hygiene and Epidemiology” of the Federal Medical Biological Agency, Central laboratory of microbiological and clinical diagnostic tests		Federal State Budgetary Institution “Centre for Strategic Planning and Management of Biomedical Health Risks” of the Federal Medical Biological Agency, Laboratory for advanced molecular diagnostics of human diseases.	119121, Moscow, Russia, Pogodinskaya str. 10	LQ-22692_S180/2022
123333	csp_omicron.fasta	hCoV-19/Russia/MOW-CSP-LQ-22693_S181/2022	betacoronavirus	Original	2022-01-23	Europe/Russia/Moscow/Moscow	Human	unknown	unknown	unknown	Illumina NextSeq	bwa mapping + consensus		Chief Federal State Budgetary Healthcare Institution “Centre of Hygiene and Epidemiology” of the Federal Medical Biological Agency, Central laboratory of microbiological and clinical diagnostic tests		Federal State Budgetary Institution “Centre for Strategic Planning and Management of Biomedical Health Risks” of the Federal Medical Biological Agency, Laboratory for advanced molecular diagnostics of human diseases.	119121, Moscow, Russia, Pogodinskaya str. 10	LQ-22693_S181/2022
123333	csp_omicron.fasta	hCoV-19/Russia/MOW-CSP-LQ-22695_S182/2022	betacoronavirus	Original	2022-01-23	Europe/Russia/Moscow/Moscow	Human	unknown	unknown	unknown	Illumina NextSeq	bwa mapping + consensus		Chief Federal State Budgetary Healthcare Institution “Centre of Hygiene and Epidemiology” of the Federal Medical Biological Agency, Central laboratory of microbiological and clinical diagnostic tests		Federal State Budgetary Institution “Centre for Strategic Planning and Management of Biomedical Health Risks” of the Federal Medical Biological Agency, Laboratory for advanced molecular diagnostics of human diseases.	119121, Moscow, Russia, Pogodinskaya str. 10	LQ-22695_S182/2022
123333	csp_omicron.fasta	hCoV-19/Russia/MOW-CSP-LQ-22714_S276/2022	betacoronavirus	Original	2022-01-23	Europe/Russia/Moscow/Moscow	Human	unknown	unknown	unknown	Illumina NextSeq	bwa mapping + consensus		Chief Federal State Budgetary Healthcare Institution “Centre of Hygiene and Epidemiology” of the Federal Medical Biological Agency, Central laboratory of microbiological and clinical diagnostic tests		Federal State Budgetary Institution “Centre for Strategic Planning and Management of Biomedical Health Risks” of the Federal Medical Biological Agency, Laboratory for advanced molecular diagnostics of human diseases.	119121, Moscow, Russia, Pogodinskaya str. 10	LQ-22714_S276/2022
123333	csp_omicron.fasta	hCoV-19/Russia/MOW-CSP-LQ-22840_S279/2022	betacoronavirus	Original	2022-01-26	Europe/Russia/Moscow/Moscow	Human	unknown	unknown	unknown	Illumina NextSeq	bwa mapping + consensus		Chief Federal State Budgetary Healthcare Institution “Centre of Hygiene and Epidemiology” of the Federal Medical Biological Agency, Central laboratory of microbiological and clinical diagnostic tests		Federal State Budgetary Institution “Centre for Strategic Planning and Management of Biomedical Health Risks” of the Federal Medical Biological Agency, Laboratory for advanced molecular diagnostics of human diseases.	119121, Moscow, Russia, Pogodinskaya str. 10	LQ-22840_S279/2022
123333	csp_omicron.fasta	hCoV-19/Russia/MOW-CSP-LQ-22847_S280/2022	betacoronavirus	Original	2022-01-26	Europe/Russia/Moscow/Moscow	Human	unknown	unknown	unknown	Illumina NextSeq	bwa mapping + consensus		Chief Federal State Budgetary Healthcare Institution “Centre of Hygiene and Epidemiology” of the Federal Medical Biological Agency, Central laboratory of microbiological and clinical diagnostic tests		Federal State Budgetary Institution “Centre for Strategic Planning and Management of Biomedical Health Risks” of the Federal Medical Biological Agency, Laboratory for advanced molecular diagnostics of human diseases.	119121, Moscow, Russia, Pogodinskaya str. 10	LQ-22847_S280/2022
123333	csp_omicron.fasta	hCoV-19/Russia/MOW-CSP-LQ-22884_S281/2022	betacoronavirus	Original	2022-01-26	Europe/Russia/Moscow/Moscow	Human	unknown	unknown	unknown	Illumina NextSeq	bwa mapping + consensus		Chief Federal State Budgetary Healthcare Institution “Centre of Hygiene and Epidemiology” of the Federal Medical Biological Agency, Central laboratory of microbiological and clinical diagnostic tests		Federal State Budgetary Institution “Centre for Strategic Planning and Management of Biomedical Health Risks” of the Federal Medical Biological Agency, Laboratory for advanced molecular diagnostics of human diseases.	119121, Moscow, Russia, Pogodinskaya str. 10	LQ-22884_S281/2022
123333	csp_omicron.fasta	hCoV-19/Russia/MOW-CSP-LQ-22885_S282/2022	betacoronavirus	Original	2022-01-26	Europe/Russia/Moscow/Moscow	Human	unknown	unknown	unknown	Illumina NextSeq	bwa mapping + consensus		Chief Federal State Budgetary Healthcare Institution “Centre of Hygiene and Epidemiology” of the Federal Medical Biological Agency, Central laboratory of microbiological and clinical diagnostic tests		Federal State Budgetary Institution “Centre for Strategic Planning and Management of Biomedical Health Risks” of the Federal Medical Biological Agency, Laboratory for advanced molecular diagnostics of human diseases.	119121, Moscow, Russia, Pogodinskaya str. 10	LQ-22885_S282/2022
123333	csp_omicron.fasta	hCoV-19/Russia/MOW-CSP-LQ-22888_S283/2022	betacoronavirus	Original	2022-01-26	Europe/Russia/Moscow/Moscow	Human	unknown	unknown	unknown	Illumina NextSeq	bwa mapping + consensus		Chief Federal State Budgetary Healthcare Institution “Centre of Hygiene and Epidemiology” of the Federal Medical Biological Agency, Central laboratory of microbiological and clinical diagnostic tests		Federal State Budgetary Institution “Centre for Strategic Planning and Management of Biomedical Health Risks” of the Federal Medical Biological Agency, Laboratory for advanced molecular diagnostics of human diseases.	119121, Moscow, Russia, Pogodinskaya str. 10	LQ-22888_S283/2022
123333	csp_omicron.fasta	hCoV-19/Russia/MOW-CSP-LQ-22902_S284/2022	betacoronavirus	Original	2022-01-26	Europe/Russia/Moscow/Moscow	Human	unknown	unknown	unknown	Illumina NextSeq	bwa mapping + consensus		Chief Federal State Budgetary Healthcare Institution “Centre of Hygiene and Epidemiology” of the Federal Medical Biological Agency, Central laboratory of microbiological and clinical diagnostic tests		Federal State Budgetary Institution “Centre for Strategic Planning and Management of Biomedical Health Risks” of the Federal Medical Biological Agency, Laboratory for advanced molecular diagnostics of human diseases.	119121, Moscow, Russia, Pogodinskaya str. 10	LQ-22902_S284/2022
123333	csp_omicron.fasta	hCoV-19/Russia/MOW-CSP-LQ-22946_S196/2022	betacoronavirus	Original	2022-01-26	Europe/Russia/Moscow/Moscow	Human	unknown	unknown	unknown	Illumina NextSeq	bwa mapping + consensus		Chief Federal State Budgetary Healthcare Institution “Centre of Hygiene and Epidemiology” of the Federal Medical Biological Agency, Central laboratory of microbiological and clinical diagnostic tests		Federal State Budgetary Institution “Centre for Strategic Planning and Management of Biomedical Health Risks” of the Federal Medical Biological Agency, Laboratory for advanced molecular diagnostics of human diseases.	119121, Moscow, Russia, Pogodinskaya str. 10	LQ-22946_S196/2022
123333	csp_omicron.fasta	hCoV-19/Russia/MOW-CSP-LQ-22951_S285/2022	betacoronavirus	Original	2022-01-26	Europe/Russia/Moscow/Moscow	Human	unknown	unknown	unknown	Illumina NextSeq	bwa mapping + consensus		Chief Federal State Budgetary Healthcare Institution “Centre of Hygiene and Epidemiology” of the Federal Medical Biological Agency, Central laboratory of microbiological and clinical diagnostic tests		Federal State Budgetary Institution “Centre for Strategic Planning and Management of Biomedical Health Risks” of the Federal Medical Biological Agency, Laboratory for advanced molecular diagnostics of human diseases.	119121, Moscow, Russia, Pogodinskaya str. 10	LQ-22951_S285/2022
123333	csp_omicron.fasta	hCoV-19/Russia/MOW-CSP-LQ-22970_S286/2022	betacoronavirus	Original	2022-01-26	Europe/Russia/Moscow/Moscow	Human	unknown	unknown	unknown	Illumina NextSeq	bwa mapping + consensus		Chief Federal State Budgetary Healthcare Institution “Centre of Hygiene and Epidemiology” of the Federal Medical Biological Agency, Central laboratory of microbiological and clinical diagnostic tests		Federal State Budgetary Institution “Centre for Strategic Planning and Management of Biomedical Health Risks” of the Federal Medical Biological Agency, Laboratory for advanced molecular diagnostics of human diseases.	119121, Moscow, Russia, Pogodinskaya str. 10	LQ-22970_S286/2022
123333	csp_omicron.fasta	hCoV-19/Russia/MOW-CSP-LQ-22984_S287/2022	betacoronavirus	Original	2022-01-26	Europe/Russia/Moscow/Moscow	Human	unknown	unknown	unknown	Illumina NextSeq	bwa mapping + consensus		Chief Federal State Budgetary Healthcare Institution “Centre of Hygiene and Epidemiology” of the Federal Medical Biological Agency, Central laboratory of microbiological and clinical diagnostic tests		Federal State Budgetary Institution “Centre for Strategic Planning and Management of Biomedical Health Risks” of the Federal Medical Biological Agency, Laboratory for advanced molecular diagnostics of human diseases.	119121, Moscow, Russia, Pogodinskaya str. 10	LQ-22984_S287/2022
123333	csp_omicron.fasta	hCoV-19/Russia/MOW-CSP-LQ-22985_S288/2022	betacoronavirus	Original	2022-01-26	Europe/Russia/Moscow/Moscow	Human	unknown	unknown	unknown	Illumina NextSeq	bwa mapping + consensus		Chief Federal State Budgetary Healthcare Institution “Centre of Hygiene and Epidemiology” of the Federal Medical Biological Agency, Central laboratory of microbiological and clinical diagnostic tests		Federal State Budgetary Institution “Centre for Strategic Planning and Management of Biomedical Health Risks” of the Federal Medical Biological Agency, Laboratory for advanced molecular diagnostics of human diseases.	119121, Moscow, Russia, Pogodinskaya str. 10	LQ-22985_S288/2022
123333	csp_omicron.fasta	hCoV-19/Russia/MOW-CSP-LQ-22993_S289/2022	betacoronavirus	Original	2022-01-26	Europe/Russia/Moscow/Moscow	Human	unknown	unknown	unknown	Illumina NextSeq	bwa mapping + consensus		Chief Federal State Budgetary Healthcare Institution “Centre of Hygiene and Epidemiology” of the Federal Medical Biological Agency, Central laboratory of microbiological and clinical diagnostic tests		Federal State Budgetary Institution “Centre for Strategic Planning and Management of Biomedical Health Risks” of the Federal Medical Biological Agency, Laboratory for advanced molecular diagnostics of human diseases.	119121, Moscow, Russia, Pogodinskaya str. 10	LQ-22993_S289/2022
123333	csp_omicron.fasta	hCoV-19/Russia/MOW-CSP-LQ-23004_S197/2022	betacoronavirus	Original	2022-01-26	Europe/Russia/Moscow/Moscow	Human	unknown	unknown	unknown	Illumina NextSeq	bwa mapping + consensus		Chief Federal State Budgetary Healthcare Institution “Centre of Hygiene and Epidemiology” of the Federal Medical Biological Agency, Central laboratory of microbiological and clinical diagnostic tests		Federal State Budgetary Institution “Centre for Strategic Planning and Management of Biomedical Health Risks” of the Federal Medical Biological Agency, Laboratory for advanced molecular diagnostics of human diseases.	119121, Moscow, Russia, Pogodinskaya str. 10	LQ-23004_S197/2022
123333	csp_omicron.fasta	hCoV-19/Russia/MOW-CSP-LQ-23007_S198/2022	betacoronavirus	Original	2022-01-26	Europe/Russia/Moscow/Moscow	Human	unknown	unknown	unknown	Illumina NextSeq	bwa mapping + consensus		Chief Federal State Budgetary Healthcare Institution “Centre of Hygiene and Epidemiology” of the Federal Medical Biological Agency, Central laboratory of microbiological and clinical diagnostic tests		Federal State Budgetary Institution “Centre for Strategic Planning and Management of Biomedical Health Risks” of the Federal Medical Biological Agency, Laboratory for advanced molecular diagnostics of human diseases.	119121, Moscow, Russia, Pogodinskaya str. 10	LQ-23007_S198/2022
123333	csp_omicron.fasta	hCoV-19/Russia/MOW-CSP-LQ-23027_S290/2022	betacoronavirus	Original	2022-01-26	Europe/Russia/Moscow/Moscow	Human	unknown	unknown	unknown	Illumina NextSeq	bwa mapping + consensus		Chief Federal State Budgetary Healthcare Institution “Centre of Hygiene and Epidemiology” of the Federal Medical Biological Agency, Central laboratory of microbiological and clinical diagnostic tests		Federal State Budgetary Institution “Centre for Strategic Planning and Management of Biomedical Health Risks” of the Federal Medical Biological Agency, Laboratory for advanced molecular diagnostics of human diseases.	119121, Moscow, Russia, Pogodinskaya str. 10	LQ-23027_S290/2022
123333	csp_omicron.fasta	hCoV-19/Russia/MOW-CSP-LQ-23030_S291/2022	betacoronavirus	Original	2022-01-26	Europe/Russia/Moscow/Moscow	Human	unknown	unknown	unknown	Illumina NextSeq	bwa mapping + consensus		Chief Federal State Budgetary Healthcare Institution “Centre of Hygiene and Epidemiology” of the Federal Medical Biological Agency, Central laboratory of microbiological and clinical diagnostic tests		Federal State Budgetary Institution “Centre for Strategic Planning and Management of Biomedical Health Risks” of the Federal Medical Biological Agency, Laboratory for advanced molecular diagnostics of human diseases.	119121, Moscow, Russia, Pogodinskaya str. 10	LQ-23030_S291/2022
123333	csp_omicron.fasta	hCoV-19/Russia/MOW-CSP-LQ-23035_S292/2022	betacoronavirus	Original	2022-01-26	Europe/Russia/Moscow/Moscow	Human	unknown	unknown	unknown	Illumina NextSeq	bwa mapping + consensus		Chief Federal State Budgetary Healthcare Institution “Centre of Hygiene and Epidemiology” of the Federal Medical Biological Agency, Central laboratory of microbiological and clinical diagnostic tests		Federal State Budgetary Institution “Centre for Strategic Planning and Management of Biomedical Health Risks” of the Federal Medical Biological Agency, Laboratory for advanced molecular diagnostics of human diseases.	119121, Moscow, Russia, Pogodinskaya str. 10	LQ-23035_S292/2022
123333	csp_omicron.fasta	hCoV-19/Russia/MOW-CSP-LQ-23061_S293/2022	betacoronavirus	Original	2022-01-26	Europe/Russia/Moscow/Moscow	Human	unknown	unknown	unknown	Illumina NextSeq	bwa mapping + consensus		Chief Federal State Budgetary Healthcare Institution “Centre of Hygiene and Epidemiology” of the Federal Medical Biological Agency, Central laboratory of microbiological and clinical diagnostic tests		Federal State Budgetary Institution “Centre for Strategic Planning and Management of Biomedical Health Risks” of the Federal Medical Biological Agency, Laboratory for advanced molecular diagnostics of human diseases.	119121, Moscow, Russia, Pogodinskaya str. 10	LQ-23061_S293/2022
123333	csp_omicron.fasta	hCoV-19/Russia/MOW-CSP-LQ-23066_S294/2022	betacoronavirus	Original	2022-01-26	Europe/Russia/Moscow/Moscow	Human	unknown	unknown	unknown	Illumina NextSeq	bwa mapping + consensus		Chief Federal State Budgetary Healthcare Institution “Centre of Hygiene and Epidemiology” of the Federal Medical Biological Agency, Central laboratory of microbiological and clinical diagnostic tests		Federal State Budgetary Institution “Centre for Strategic Planning and Management of Biomedical Health Risks” of the Federal Medical Biological Agency, Laboratory for advanced molecular diagnostics of human diseases.	119121, Moscow, Russia, Pogodinskaya str. 10	LQ-23066_S294/2022
123333	csp_omicron.fasta	hCoV-19/Russia/MOW-CSP-LQ-23067_S295/2022	betacoronavirus	Original	2022-01-26	Europe/Russia/Moscow/Moscow	Human	unknown	unknown	unknown	Illumina NextSeq	bwa mapping + consensus		Chief Federal State Budgetary Healthcare Institution “Centre of Hygiene and Epidemiology” of the Federal Medical Biological Agency, Central laboratory of microbiological and clinical diagnostic tests		Federal State Budgetary Institution “Centre for Strategic Planning and Management of Biomedical Health Risks” of the Federal Medical Biological Agency, Laboratory for advanced molecular diagnostics of human diseases.	119121, Moscow, Russia, Pogodinskaya str. 10	LQ-23067_S295/2022
123333	csp_omicron.fasta	hCoV-19/Russia/MOW-CSP-LQ-23072_S296/2022	betacoronavirus	Original	2022-01-26	Europe/Russia/Moscow/Moscow	Human	unknown	unknown	unknown	Illumina NextSeq	bwa mapping + consensus		Chief Federal State Budgetary Healthcare Institution “Centre of Hygiene and Epidemiology” of the Federal Medical Biological Agency, Central laboratory of microbiological and clinical diagnostic tests		Federal State Budgetary Institution “Centre for Strategic Planning and Management of Biomedical Health Risks” of the Federal Medical Biological Agency, Laboratory for advanced molecular diagnostics of human diseases.	119121, Moscow, Russia, Pogodinskaya str. 10	LQ-23072_S296/2022
123333	csp_omicron.fasta	hCoV-19/Russia/MOW-CSP-LQ-23075_S297/2022	betacoronavirus	Original	2022-01-26	Europe/Russia/Moscow/Moscow	Human	unknown	unknown	unknown	Illumina NextSeq	bwa mapping + consensus		Chief Federal State Budgetary Healthcare Institution “Centre of Hygiene and Epidemiology” of the Federal Medical Biological Agency, Central laboratory of microbiological and clinical diagnostic tests		Federal State Budgetary Institution “Centre for Strategic Planning and Management of Biomedical Health Risks” of the Federal Medical Biological Agency, Laboratory for advanced molecular diagnostics of human diseases.	119121, Moscow, Russia, Pogodinskaya str. 10	LQ-23075_S297/2022
123333	csp_omicron.fasta	hCoV-19/Russia/MOW-CSP-LQ-23076_S298/2022	betacoronavirus	Original	2022-01-26	Europe/Russia/Moscow/Moscow	Human	unknown	unknown	unknown	Illumina NextSeq	bwa mapping + consensus		Chief Federal State Budgetary Healthcare Institution “Centre of Hygiene and Epidemiology” of the Federal Medical Biological Agency, Central laboratory of microbiological and clinical diagnostic tests		Federal State Budgetary Institution “Centre for Strategic Planning and Management of Biomedical Health Risks” of the Federal Medical Biological Agency, Laboratory for advanced molecular diagnostics of human diseases.	119121, Moscow, Russia, Pogodinskaya str. 10	LQ-23076_S298/2022
123333	csp_omicron.fasta	hCoV-19/Russia/MOW-CSP-LQ-23080_S299/2022	betacoronavirus	Original	2022-01-26	Europe/Russia/Moscow/Moscow	Human	unknown	unknown	unknown	Illumina NextSeq	bwa mapping + consensus		Chief Federal State Budgetary Healthcare Institution “Centre of Hygiene and Epidemiology” of the Federal Medical Biological Agency, Central laboratory of microbiological and clinical diagnostic tests		Federal State Budgetary Institution “Centre for Strategic Planning and Management of Biomedical Health Risks” of the Federal Medical Biological Agency, Laboratory for advanced molecular diagnostics of human diseases.	119121, Moscow, Russia, Pogodinskaya str. 10	LQ-23080_S299/2022
123333	csp_omicron.fasta	hCoV-19/Russia/MOW-CSP-LQ-23082_S300/2022	betacoronavirus	Original	2022-01-26	Europe/Russia/Moscow/Moscow	Human	unknown	unknown	unknown	Illumina NextSeq	bwa mapping + consensus		Chief Federal State Budgetary Healthcare Institution “Centre of Hygiene and Epidemiology” of the Federal Medical Biological Agency, Central laboratory of microbiological and clinical diagnostic tests		Federal State Budgetary Institution “Centre for Strategic Planning and Management of Biomedical Health Risks” of the Federal Medical Biological Agency, Laboratory for advanced molecular diagnostics of human diseases.	119121, Moscow, Russia, Pogodinskaya str. 10	LQ-23082_S300/2022
123333	csp_omicron.fasta	hCoV-19/Russia/MOW-CSP-LQ-23093_S301/2022	betacoronavirus	Original	2022-01-26	Europe/Russia/Moscow/Moscow	Human	unknown	unknown	unknown	Illumina NextSeq	bwa mapping + consensus		Chief Federal State Budgetary Healthcare Institution “Centre of Hygiene and Epidemiology” of the Federal Medical Biological Agency, Central laboratory of microbiological and clinical diagnostic tests		Federal State Budgetary Institution “Centre for Strategic Planning and Management of Biomedical Health Risks” of the Federal Medical Biological Agency, Laboratory for advanced molecular diagnostics of human diseases.	119121, Moscow, Russia, Pogodinskaya str. 10	LQ-23093_S301/2022
123333	csp_omicron.fasta	hCoV-19/Russia/MOW-CSP-LQ-23095_S302/2022	betacoronavirus	Original	2022-01-26	Europe/Russia/Moscow/Moscow	Human	unknown	unknown	unknown	Illumina NextSeq	bwa mapping + consensus		Chief Federal State Budgetary Healthcare Institution “Centre of Hygiene and Epidemiology” of the Federal Medical Biological Agency, Central laboratory of microbiological and clinical diagnostic tests		Federal State Budgetary Institution “Centre for Strategic Planning and Management of Biomedical Health Risks” of the Federal Medical Biological Agency, Laboratory for advanced molecular diagnostics of human diseases.	119121, Moscow, Russia, Pogodinskaya str. 10	LQ-23095_S302/2022
123333	csp_omicron.fasta	hCoV-19/Russia/MOW-CSP-LQ-23104_S303/2022	betacoronavirus	Original	2022-01-26	Europe/Russia/Moscow/Moscow	Human	unknown	unknown	unknown	Illumina NextSeq	bwa mapping + consensus		Chief Federal State Budgetary Healthcare Institution “Centre of Hygiene and Epidemiology” of the Federal Medical Biological Agency, Central laboratory of microbiological and clinical diagnostic tests		Federal State Budgetary Institution “Centre for Strategic Planning and Management of Biomedical Health Risks” of the Federal Medical Biological Agency, Laboratory for advanced molecular diagnostics of human diseases.	119121, Moscow, Russia, Pogodinskaya str. 10	LQ-23104_S303/2022
123333	csp_omicron.fasta	hCoV-19/Russia/MOW-CSP-LQ-23112_S304/2022	betacoronavirus	Original	2022-01-26	Europe/Russia/Moscow/Moscow	Human	unknown	unknown	unknown	Illumina NextSeq	bwa mapping + consensus		Chief Federal State Budgetary Healthcare Institution “Centre of Hygiene and Epidemiology” of the Federal Medical Biological Agency, Central laboratory of microbiological and clinical diagnostic tests		Federal State Budgetary Institution “Centre for Strategic Planning and Management of Biomedical Health Risks” of the Federal Medical Biological Agency, Laboratory for advanced molecular diagnostics of human diseases.	119121, Moscow, Russia, Pogodinskaya str. 10	LQ-23112_S304/2022
123333	csp_omicron.fasta	hCoV-19/Russia/MOW-CSP-LQ-23115_S305/2022	betacoronavirus	Original	2022-01-26	Europe/Russia/Moscow/Moscow	Human	unknown	unknown	unknown	Illumina NextSeq	bwa mapping + consensus		Chief Federal State Budgetary Healthcare Institution “Centre of Hygiene and Epidemiology” of the Federal Medical Biological Agency, Central laboratory of microbiological and clinical diagnostic tests		Federal State Budgetary Institution “Centre for Strategic Planning and Management of Biomedical Health Risks” of the Federal Medical Biological Agency, Laboratory for advanced molecular diagnostics of human diseases.	119121, Moscow, Russia, Pogodinskaya str. 10	LQ-23115_S305/2022
123333	csp_omicron.fasta	hCoV-19/Russia/MOW-CSP-LQ-23118_S306/2022	betacoronavirus	Original	2022-01-26	Europe/Russia/Moscow/Moscow	Human	unknown	unknown	unknown	Illumina NextSeq	bwa mapping + consensus		Chief Federal State Budgetary Healthcare Institution “Centre of Hygiene and Epidemiology” of the Federal Medical Biological Agency, Central laboratory of microbiological and clinical diagnostic tests		Federal State Budgetary Institution “Centre for Strategic Planning and Management of Biomedical Health Risks” of the Federal Medical Biological Agency, Laboratory for advanced molecular diagnostics of human diseases.	119121, Moscow, Russia, Pogodinskaya str. 10	LQ-23118_S306/2022
123333	csp_omicron.fasta	hCoV-19/Russia/MOW-CSP-LQ-23121_S199/2022	betacoronavirus	Original	2022-01-26	Europe/Russia/Moscow/Moscow	Human	unknown	unknown	unknown	Illumina NextSeq	bwa mapping + consensus		Chief Federal State Budgetary Healthcare Institution “Centre of Hygiene and Epidemiology” of the Federal Medical Biological Agency, Central laboratory of microbiological and clinical diagnostic tests		Federal State Budgetary Institution “Centre for Strategic Planning and Management of Biomedical Health Risks” of the Federal Medical Biological Agency, Laboratory for advanced molecular diagnostics of human diseases.	119121, Moscow, Russia, Pogodinskaya str. 10	LQ-23121_S199/2022
123333	csp_omicron.fasta	hCoV-19/Russia/MOW-CSP-LQ-23122_S307/2022	betacoronavirus	Original	2022-01-26	Europe/Russia/Moscow/Moscow	Human	unknown	unknown	unknown	Illumina NextSeq	bwa mapping + consensus		Chief Federal State Budgetary Healthcare Institution “Centre of Hygiene and Epidemiology” of the Federal Medical Biological Agency, Central laboratory of microbiological and clinical diagnostic tests		Federal State Budgetary Institution “Centre for Strategic Planning and Management of Biomedical Health Risks” of the Federal Medical Biological Agency, Laboratory for advanced molecular diagnostics of human diseases.	119121, Moscow, Russia, Pogodinskaya str. 10	LQ-23122_S307/2022
123333	csp_omicron.fasta	hCoV-19/Russia/MOW-CSP-LQ-23125_S308/2022	betacoronavirus	Original	2022-01-26	Europe/Russia/Moscow/Moscow	Human	unknown	unknown	unknown	Illumina NextSeq	bwa mapping + consensus		Chief Federal State Budgetary Healthcare Institution “Centre of Hygiene and Epidemiology” of the Federal Medical Biological Agency, Central laboratory of microbiological and clinical diagnostic tests		Federal State Budgetary Institution “Centre for Strategic Planning and Management of Biomedical Health Risks” of the Federal Medical Biological Agency, Laboratory for advanced molecular diagnostics of human diseases.	119121, Moscow, Russia, Pogodinskaya str. 10	LQ-23125_S308/2022
123333	csp_omicron.fasta	hCoV-19/Russia/MOW-CSP-LQ-23126_S309/2022	betacoronavirus	Original	2022-01-26	Europe/Russia/Moscow/Moscow	Human	unknown	unknown	unknown	Illumina NextSeq	bwa mapping + consensus		Chief Federal State Budgetary Healthcare Institution “Centre of Hygiene and Epidemiology” of the Federal Medical Biological Agency, Central laboratory of microbiological and clinical diagnostic tests		Federal State Budgetary Institution “Centre for Strategic Planning and Management of Biomedical Health Risks” of the Federal Medical Biological Agency, Laboratory for advanced molecular diagnostics of human diseases.	119121, Moscow, Russia, Pogodinskaya str. 10	LQ-23126_S309/2022
123333	csp_omicron.fasta	hCoV-19/Russia/MOW-CSP-LQ-23131_S310/2022	betacoronavirus	Original	2022-01-26	Europe/Russia/Moscow/Moscow	Human	unknown	unknown	unknown	Illumina NextSeq	bwa mapping + consensus		Chief Federal State Budgetary Healthcare Institution “Centre of Hygiene and Epidemiology” of the Federal Medical Biological Agency, Central laboratory of microbiological and clinical diagnostic tests		Federal State Budgetary Institution “Centre for Strategic Planning and Management of Biomedical Health Risks” of the Federal Medical Biological Agency, Laboratory for advanced molecular diagnostics of human diseases.	119121, Moscow, Russia, Pogodinskaya str. 10	LQ-23131_S310/2022
123333	csp_omicron.fasta	hCoV-19/Russia/MOW-CSP-LQ-23137_S311/2022	betacoronavirus	Original	2022-01-26	Europe/Russia/Moscow/Moscow	Human	unknown	unknown	unknown	Illumina NextSeq	bwa mapping + consensus		Chief Federal State Budgetary Healthcare Institution “Centre of Hygiene and Epidemiology” of the Federal Medical Biological Agency, Central laboratory of microbiological and clinical diagnostic tests		Federal State Budgetary Institution “Centre for Strategic Planning and Management of Biomedical Health Risks” of the Federal Medical Biological Agency, Laboratory for advanced molecular diagnostics of human diseases.	119121, Moscow, Russia, Pogodinskaya str. 10	LQ-23137_S311/2022
123333	csp_omicron.fasta	hCoV-19/Russia/MOW-CSP-LQ-23138_S312/2022	betacoronavirus	Original	2022-01-26	Europe/Russia/Moscow/Moscow	Human	unknown	unknown	unknown	Illumina NextSeq	bwa mapping + consensus		Chief Federal State Budgetary Healthcare Institution “Centre of Hygiene and Epidemiology” of the Federal Medical Biological Agency, Central laboratory of microbiological and clinical diagnostic tests		Federal State Budgetary Institution “Centre for Strategic Planning and Management of Biomedical Health Risks” of the Federal Medical Biological Agency, Laboratory for advanced molecular diagnostics of human diseases.	119121, Moscow, Russia, Pogodinskaya str. 10	LQ-23138_S312/2022
123333	csp_omicron.fasta	hCoV-19/Russia/MOW-CSP-LQ-23140_S313/2022	betacoronavirus	Original	2022-01-26	Europe/Russia/Moscow/Moscow	Human	unknown	unknown	unknown	Illumina NextSeq	bwa mapping + consensus		Chief Federal State Budgetary Healthcare Institution “Centre of Hygiene and Epidemiology” of the Federal Medical Biological Agency, Central laboratory of microbiological and clinical diagnostic tests		Federal State Budgetary Institution “Centre for Strategic Planning and Management of Biomedical Health Risks” of the Federal Medical Biological Agency, Laboratory for advanced molecular diagnostics of human diseases.	119121, Moscow, Russia, Pogodinskaya str. 10	LQ-23140_S313/2022
123333	csp_omicron.fasta	hCoV-19/Russia/MOW-CSP-LQ-23141_S314/2022	betacoronavirus	Original	2022-01-26	Europe/Russia/Moscow/Moscow	Human	unknown	unknown	unknown	Illumina NextSeq	bwa mapping + consensus		Chief Federal State Budgetary Healthcare Institution “Centre of Hygiene and Epidemiology” of the Federal Medical Biological Agency, Central laboratory of microbiological and clinical diagnostic tests		Federal State Budgetary Institution “Centre for Strategic Planning and Management of Biomedical Health Risks” of the Federal Medical Biological Agency, Laboratory for advanced molecular diagnostics of human diseases.	119121, Moscow, Russia, Pogodinskaya str. 10	LQ-23141_S314/2022
123333	csp_omicron.fasta	hCoV-19/Russia/MOW-CSP-LQ-23144_S315/2022	betacoronavirus	Original	2022-01-26	Europe/Russia/Moscow/Moscow	Human	unknown	unknown	unknown	Illumina NextSeq	bwa mapping + consensus		Chief Federal State Budgetary Healthcare Institution “Centre of Hygiene and Epidemiology” of the Federal Medical Biological Agency, Central laboratory of microbiological and clinical diagnostic tests		Federal State Budgetary Institution “Centre for Strategic Planning and Management of Biomedical Health Risks” of the Federal Medical Biological Agency, Laboratory for advanced molecular diagnostics of human diseases.	119121, Moscow, Russia, Pogodinskaya str. 10	LQ-23144_S315/2022
123333	csp_omicron.fasta	hCoV-19/Russia/MOW-CSP-LQ-23145_S316/2022	betacoronavirus	Original	2022-01-26	Europe/Russia/Moscow/Moscow	Human	unknown	unknown	unknown	Illumina NextSeq	bwa mapping + consensus		Chief Federal State Budgetary Healthcare Institution “Centre of Hygiene and Epidemiology” of the Federal Medical Biological Agency, Central laboratory of microbiological and clinical diagnostic tests		Federal State Budgetary Institution “Centre for Strategic Planning and Management of Biomedical Health Risks” of the Federal Medical Biological Agency, Laboratory for advanced molecular diagnostics of human diseases.	119121, Moscow, Russia, Pogodinskaya str. 10	LQ-23145_S316/2022
123333	csp_omicron.fasta	hCoV-19/Russia/MOW-CSP-LQ-23147_S317/2022	betacoronavirus	Original	2022-01-26	Europe/Russia/Moscow/Moscow	Human	unknown	unknown	unknown	Illumina NextSeq	bwa mapping + consensus		Chief Federal State Budgetary Healthcare Institution “Centre of Hygiene and Epidemiology” of the Federal Medical Biological Agency, Central laboratory of microbiological and clinical diagnostic tests		Federal State Budgetary Institution “Centre for Strategic Planning and Management of Biomedical Health Risks” of the Federal Medical Biological Agency, Laboratory for advanced molecular diagnostics of human diseases.	119121, Moscow, Russia, Pogodinskaya str. 10	LQ-23147_S317/2022
123333	csp_omicron.fasta	hCoV-19/Russia/MOW-CSP-LQ-23149_S318/2022	betacoronavirus	Original	2022-01-26	Europe/Russia/Moscow/Moscow	Human	unknown	unknown	unknown	Illumina NextSeq	bwa mapping + consensus		Chief Federal State Budgetary Healthcare Institution “Centre of Hygiene and Epidemiology” of the Federal Medical Biological Agency, Central laboratory of microbiological and clinical diagnostic tests		Federal State Budgetary Institution “Centre for Strategic Planning and Management of Biomedical Health Risks” of the Federal Medical Biological Agency, Laboratory for advanced molecular diagnostics of human diseases.	119121, Moscow, Russia, Pogodinskaya str. 10	LQ-23149_S318/2022
123333	csp_omicron.fasta	hCoV-19/Russia/MOW-CSP-LQ-23153_S319/2022	betacoronavirus	Original	2022-01-26	Europe/Russia/Moscow/Moscow	Human	unknown	unknown	unknown	Illumina NextSeq	bwa mapping + consensus		Chief Federal State Budgetary Healthcare Institution “Centre of Hygiene and Epidemiology” of the Federal Medical Biological Agency, Central laboratory of microbiological and clinical diagnostic tests		Federal State Budgetary Institution “Centre for Strategic Planning and Management of Biomedical Health Risks” of the Federal Medical Biological Agency, Laboratory for advanced molecular diagnostics of human diseases.	119121, Moscow, Russia, Pogodinskaya str. 10	LQ-23153_S319/2022
123333	csp_omicron.fasta	hCoV-19/Russia/MOW-CSP-LQ-23155_S320/2022	betacoronavirus	Original	2022-01-26	Europe/Russia/Moscow/Moscow	Human	unknown	unknown	unknown	Illumina NextSeq	bwa mapping + consensus		Chief Federal State Budgetary Healthcare Institution “Centre of Hygiene and Epidemiology” of the Federal Medical Biological Agency, Central laboratory of microbiological and clinical diagnostic tests		Federal State Budgetary Institution “Centre for Strategic Planning and Management of Biomedical Health Risks” of the Federal Medical Biological Agency, Laboratory for advanced molecular diagnostics of human diseases.	119121, Moscow, Russia, Pogodinskaya str. 10	LQ-23155_S320/2022
123333	csp_omicron.fasta	hCoV-19/Russia/MOW-CSP-LQ-23156_S200/2022	betacoronavirus	Original	2022-01-26	Europe/Russia/Moscow/Moscow	Human	unknown	unknown	unknown	Illumina NextSeq	bwa mapping + consensus		Chief Federal State Budgetary Healthcare Institution “Centre of Hygiene and Epidemiology” of the Federal Medical Biological Agency, Central laboratory of microbiological and clinical diagnostic tests		Federal State Budgetary Institution “Centre for Strategic Planning and Management of Biomedical Health Risks” of the Federal Medical Biological Agency, Laboratory for advanced molecular diagnostics of human diseases.	119121, Moscow, Russia, Pogodinskaya str. 10	LQ-23156_S200/2022
123333	csp_omicron.fasta	hCoV-19/Russia/MOW-CSP-LQ-23161_S321/2022	betacoronavirus	Original	2022-01-26	Europe/Russia/Moscow/Moscow	Human	unknown	unknown	unknown	Illumina NextSeq	bwa mapping + consensus		Chief Federal State Budgetary Healthcare Institution “Centre of Hygiene and Epidemiology” of the Federal Medical Biological Agency, Central laboratory of microbiological and clinical diagnostic tests		Federal State Budgetary Institution “Centre for Strategic Planning and Management of Biomedical Health Risks” of the Federal Medical Biological Agency, Laboratory for advanced molecular diagnostics of human diseases.	119121, Moscow, Russia, Pogodinskaya str. 10	LQ-23161_S321/2022
123333	csp_omicron.fasta	hCoV-19/Russia/MOW-CSP-LQ-23163_S322/2022	betacoronavirus	Original	2022-01-26	Europe/Russia/Moscow/Moscow	Human	unknown	unknown	unknown	Illumina NextSeq	bwa mapping + consensus		Chief Federal State Budgetary Healthcare Institution “Centre of Hygiene and Epidemiology” of the Federal Medical Biological Agency, Central laboratory of microbiological and clinical diagnostic tests		Federal State Budgetary Institution “Centre for Strategic Planning and Management of Biomedical Health Risks” of the Federal Medical Biological Agency, Laboratory for advanced molecular diagnostics of human diseases.	119121, Moscow, Russia, Pogodinskaya str. 10	LQ-23163_S322/2022
123333	csp_omicron.fasta	hCoV-19/Russia/MOW-CSP-LQ-23165_S323/2022	betacoronavirus	Original	2022-01-26	Europe/Russia/Moscow/Moscow	Human	unknown	unknown	unknown	Illumina NextSeq	bwa mapping + consensus		Chief Federal State Budgetary Healthcare Institution “Centre of Hygiene and Epidemiology” of the Federal Medical Biological Agency, Central laboratory of microbiological and clinical diagnostic tests		Federal State Budgetary Institution “Centre for Strategic Planning and Management of Biomedical Health Risks” of the Federal Medical Biological Agency, Laboratory for advanced molecular diagnostics of human diseases.	119121, Moscow, Russia, Pogodinskaya str. 10	LQ-23165_S323/2022
123333	csp_omicron.fasta	hCoV-19/Russia/MOW-CSP-LQ-23167_S324/2022	betacoronavirus	Original	2022-01-26	Europe/Russia/Moscow/Moscow	Human	unknown	unknown	unknown	Illumina NextSeq	bwa mapping + consensus		Chief Federal State Budgetary Healthcare Institution “Centre of Hygiene and Epidemiology” of the Federal Medical Biological Agency, Central laboratory of microbiological and clinical diagnostic tests		Federal State Budgetary Institution “Centre for Strategic Planning and Management of Biomedical Health Risks” of the Federal Medical Biological Agency, Laboratory for advanced molecular diagnostics of human diseases.	119121, Moscow, Russia, Pogodinskaya str. 10	LQ-23167_S324/2022
123333	csp_omicron.fasta	hCoV-19/Russia/MOW-CSP-LQ-23177_S325/2022	betacoronavirus	Original	2022-01-26	Europe/Russia/Moscow/Moscow	Human	unknown	unknown	unknown	Illumina NextSeq	bwa mapping + consensus		Chief Federal State Budgetary Healthcare Institution “Centre of Hygiene and Epidemiology” of the Federal Medical Biological Agency, Central laboratory of microbiological and clinical diagnostic tests		Federal State Budgetary Institution “Centre for Strategic Planning and Management of Biomedical Health Risks” of the Federal Medical Biological Agency, Laboratory for advanced molecular diagnostics of human diseases.	119121, Moscow, Russia, Pogodinskaya str. 10	LQ-23177_S325/2022
123333	csp_omicron.fasta	hCoV-19/Russia/MOW-CSP-LQ-23178_S326/2022	betacoronavirus	Original	2022-01-26	Europe/Russia/Moscow/Moscow	Human	unknown	unknown	unknown	Illumina NextSeq	bwa mapping + consensus		Chief Federal State Budgetary Healthcare Institution “Centre of Hygiene and Epidemiology” of the Federal Medical Biological Agency, Central laboratory of microbiological and clinical diagnostic tests		Federal State Budgetary Institution “Centre for Strategic Planning and Management of Biomedical Health Risks” of the Federal Medical Biological Agency, Laboratory for advanced molecular diagnostics of human diseases.	119121, Moscow, Russia, Pogodinskaya str. 10	LQ-23178_S326/2022
123333	csp_omicron.fasta	hCoV-19/Russia/MOW-CSP-LQ-23182_S327/2022	betacoronavirus	Original	2022-01-26	Europe/Russia/Moscow/Moscow	Human	unknown	unknown	unknown	Illumina NextSeq	bwa mapping + consensus		Chief Federal State Budgetary Healthcare Institution “Centre of Hygiene and Epidemiology” of the Federal Medical Biological Agency, Central laboratory of microbiological and clinical diagnostic tests		Federal State Budgetary Institution “Centre for Strategic Planning and Management of Biomedical Health Risks” of the Federal Medical Biological Agency, Laboratory for advanced molecular diagnostics of human diseases.	119121, Moscow, Russia, Pogodinskaya str. 10	LQ-23182_S327/2022
123333	csp_omicron.fasta	hCoV-19/Russia/MOW-CSP-LQ-23185_S328/2022	betacoronavirus	Original	2022-01-26	Europe/Russia/Moscow/Moscow	Human	unknown	unknown	unknown	Illumina NextSeq	bwa mapping + consensus		Chief Federal State Budgetary Healthcare Institution “Centre of Hygiene and Epidemiology” of the Federal Medical Biological Agency, Central laboratory of microbiological and clinical diagnostic tests		Federal State Budgetary Institution “Centre for Strategic Planning and Management of Biomedical Health Risks” of the Federal Medical Biological Agency, Laboratory for advanced molecular diagnostics of human diseases.	119121, Moscow, Russia, Pogodinskaya str. 10	LQ-23185_S328/2022
123333	csp_omicron.fasta	hCoV-19/Russia/MOW-CSP-LQ-23198_S329/2022	betacoronavirus	Original	2022-01-26	Europe/Russia/Moscow/Moscow	Human	unknown	unknown	unknown	Illumina NextSeq	bwa mapping + consensus		Chief Federal State Budgetary Healthcare Institution “Centre of Hygiene and Epidemiology” of the Federal Medical Biological Agency, Central laboratory of microbiological and clinical diagnostic tests		Federal State Budgetary Institution “Centre for Strategic Planning and Management of Biomedical Health Risks” of the Federal Medical Biological Agency, Laboratory for advanced molecular diagnostics of human diseases.	119121, Moscow, Russia, Pogodinskaya str. 10	LQ-23198_S329/2022
123333	csp_omicron.fasta	hCoV-19/Russia/MOW-CSP-LQ-23204_S330/2022	betacoronavirus	Original	2022-01-26	Europe/Russia/Moscow/Moscow	Human	unknown	unknown	unknown	Illumina NextSeq	bwa mapping + consensus		Chief Federal State Budgetary Healthcare Institution “Centre of Hygiene and Epidemiology” of the Federal Medical Biological Agency, Central laboratory of microbiological and clinical diagnostic tests		Federal State Budgetary Institution “Centre for Strategic Planning and Management of Biomedical Health Risks” of the Federal Medical Biological Agency, Laboratory for advanced molecular diagnostics of human diseases.	119121, Moscow, Russia, Pogodinskaya str. 10	LQ-23204_S330/2022
123333	csp_omicron.fasta	hCoV-19/Russia/MOW-CSP-LQ-23215_S331/2022	betacoronavirus	Original	2022-01-29	Europe/Russia/Moscow/Moscow	Human	unknown	unknown	unknown	Illumina NextSeq	bwa mapping + consensus		Chief Federal State Budgetary Healthcare Institution “Centre of Hygiene and Epidemiology” of the Federal Medical Biological Agency, Central laboratory of microbiological and clinical diagnostic tests		Federal State Budgetary Institution “Centre for Strategic Planning and Management of Biomedical Health Risks” of the Federal Medical Biological Agency, Laboratory for advanced molecular diagnostics of human diseases.	119121, Moscow, Russia, Pogodinskaya str. 10	LQ-23215_S331/2022
123333	csp_omicron.fasta	hCoV-19/Russia/MOW-CSP-LQ-23224_S332/2022	betacoronavirus	Original	2022-01-29	Europe/Russia/Moscow/Moscow	Human	unknown	unknown	unknown	Illumina NextSeq	bwa mapping + consensus		Chief Federal State Budgetary Healthcare Institution “Centre of Hygiene and Epidemiology” of the Federal Medical Biological Agency, Central laboratory of microbiological and clinical diagnostic tests		Federal State Budgetary Institution “Centre for Strategic Planning and Management of Biomedical Health Risks” of the Federal Medical Biological Agency, Laboratory for advanced molecular diagnostics of human diseases.	119121, Moscow, Russia, Pogodinskaya str. 10	LQ-23224_S332/2022
123333	csp_omicron.fasta	hCoV-19/Russia/MOW-CSP-LQ-23226_S333/2022	betacoronavirus	Original	2022-01-29	Europe/Russia/Moscow/Moscow	Human	unknown	unknown	unknown	Illumina NextSeq	bwa mapping + consensus		Chief Federal State Budgetary Healthcare Institution “Centre of Hygiene and Epidemiology” of the Federal Medical Biological Agency, Central laboratory of microbiological and clinical diagnostic tests		Federal State Budgetary Institution “Centre for Strategic Planning and Management of Biomedical Health Risks” of the Federal Medical Biological Agency, Laboratory for advanced molecular diagnostics of human diseases.	119121, Moscow, Russia, Pogodinskaya str. 10	LQ-23226_S333/2022
123333	csp_omicron.fasta	hCoV-19/Russia/MOW-CSP-LQ-23227_S334/2022	betacoronavirus	Original	2022-01-29	Europe/Russia/Moscow/Moscow	Human	unknown	unknown	unknown	Illumina NextSeq	bwa mapping + consensus		Chief Federal State Budgetary Healthcare Institution “Centre of Hygiene and Epidemiology” of the Federal Medical Biological Agency, Central laboratory of microbiological and clinical diagnostic tests		Federal State Budgetary Institution “Centre for Strategic Planning and Management of Biomedical Health Risks” of the Federal Medical Biological Agency, Laboratory for advanced molecular diagnostics of human diseases.	119121, Moscow, Russia, Pogodinskaya str. 10	LQ-23227_S334/2022
123333	csp_omicron.fasta	hCoV-19/Russia/MOW-CSP-LQ-23228_S335/2022	betacoronavirus	Original	2022-01-29	Europe/Russia/Moscow/Moscow	Human	unknown	unknown	unknown	Illumina NextSeq	bwa mapping + consensus		Chief Federal State Budgetary Healthcare Institution “Centre of Hygiene and Epidemiology” of the Federal Medical Biological Agency, Central laboratory of microbiological and clinical diagnostic tests		Federal State Budgetary Institution “Centre for Strategic Planning and Management of Biomedical Health Risks” of the Federal Medical Biological Agency, Laboratory for advanced molecular diagnostics of human diseases.	119121, Moscow, Russia, Pogodinskaya str. 10	LQ-23228_S335/2022
123333	csp_omicron.fasta	hCoV-19/Russia/MOW-CSP-LQ-23234_S336/2022	betacoronavirus	Original	2022-01-29	Europe/Russia/Moscow/Moscow	Human	unknown	unknown	unknown	Illumina NextSeq	bwa mapping + consensus		Chief Federal State Budgetary Healthcare Institution “Centre of Hygiene and Epidemiology” of the Federal Medical Biological Agency, Central laboratory of microbiological and clinical diagnostic tests		Federal State Budgetary Institution “Centre for Strategic Planning and Management of Biomedical Health Risks” of the Federal Medical Biological Agency, Laboratory for advanced molecular diagnostics of human diseases.	119121, Moscow, Russia, Pogodinskaya str. 10	LQ-23234_S336/2022
123333	csp_omicron.fasta	hCoV-19/Russia/MOW-CSP-LQ-23248_S337/2022	betacoronavirus	Original	2022-01-29	Europe/Russia/Moscow/Moscow	Human	unknown	unknown	unknown	Illumina NextSeq	bwa mapping + consensus		Chief Federal State Budgetary Healthcare Institution “Centre of Hygiene and Epidemiology” of the Federal Medical Biological Agency, Central laboratory of microbiological and clinical diagnostic tests		Federal State Budgetary Institution “Centre for Strategic Planning and Management of Biomedical Health Risks” of the Federal Medical Biological Agency, Laboratory for advanced molecular diagnostics of human diseases.	119121, Moscow, Russia, Pogodinskaya str. 10	LQ-23248_S337/2022
123333	csp_omicron.fasta	hCoV-19/Russia/MOW-CSP-LQ-23252_S338/2022	betacoronavirus	Original	2022-01-29	Europe/Russia/Moscow/Moscow	Human	unknown	unknown	unknown	Illumina NextSeq	bwa mapping + consensus		Chief Federal State Budgetary Healthcare Institution “Centre of Hygiene and Epidemiology” of the Federal Medical Biological Agency, Central laboratory of microbiological and clinical diagnostic tests		Federal State Budgetary Institution “Centre for Strategic Planning and Management of Biomedical Health Risks” of the Federal Medical Biological Agency, Laboratory for advanced molecular diagnostics of human diseases.	119121, Moscow, Russia, Pogodinskaya str. 10	LQ-23252_S338/2022
123333	csp_omicron.fasta	hCoV-19/Russia/MOW-CSP-LQ-23268_S339/2022	betacoronavirus	Original	2022-01-29	Europe/Russia/Moscow/Moscow	Human	unknown	unknown	unknown	Illumina NextSeq	bwa mapping + consensus		Chief Federal State Budgetary Healthcare Institution “Centre of Hygiene and Epidemiology” of the Federal Medical Biological Agency, Central laboratory of microbiological and clinical diagnostic tests		Federal State Budgetary Institution “Centre for Strategic Planning and Management of Biomedical Health Risks” of the Federal Medical Biological Agency, Laboratory for advanced molecular diagnostics of human diseases.	119121, Moscow, Russia, Pogodinskaya str. 10	LQ-23268_S339/2022
123333	csp_omicron.fasta	hCoV-19/Russia/MOW-CSP-LQ-23271_S340/2022	betacoronavirus	Original	2022-01-29	Europe/Russia/Moscow/Moscow	Human	unknown	unknown	unknown	Illumina NextSeq	bwa mapping + consensus		Chief Federal State Budgetary Healthcare Institution “Centre of Hygiene and Epidemiology” of the Federal Medical Biological Agency, Central laboratory of microbiological and clinical diagnostic tests		Federal State Budgetary Institution “Centre for Strategic Planning and Management of Biomedical Health Risks” of the Federal Medical Biological Agency, Laboratory for advanced molecular diagnostics of human diseases.	119121, Moscow, Russia, Pogodinskaya str. 10	LQ-23271_S340/2022
123333	csp_omicron.fasta	hCoV-19/Russia/MOW-CSP-LQ-23274_S341/2022	betacoronavirus	Original	2022-01-29	Europe/Russia/Moscow/Moscow	Human	unknown	unknown	unknown	Illumina NextSeq	bwa mapping + consensus		Chief Federal State Budgetary Healthcare Institution “Centre of Hygiene and Epidemiology” of the Federal Medical Biological Agency, Central laboratory of microbiological and clinical diagnostic tests		Federal State Budgetary Institution “Centre for Strategic Planning and Management of Biomedical Health Risks” of the Federal Medical Biological Agency, Laboratory for advanced molecular diagnostics of human diseases.	119121, Moscow, Russia, Pogodinskaya str. 10	LQ-23274_S341/2022
123333	csp_omicron.fasta	hCoV-19/Russia/MOW-CSP-LQ-23276_S342/2022	betacoronavirus	Original	2022-01-29	Europe/Russia/Moscow/Moscow	Human	unknown	unknown	unknown	Illumina NextSeq	bwa mapping + consensus		Chief Federal State Budgetary Healthcare Institution “Centre of Hygiene and Epidemiology” of the Federal Medical Biological Agency, Central laboratory of microbiological and clinical diagnostic tests		Federal State Budgetary Institution “Centre for Strategic Planning and Management of Biomedical Health Risks” of the Federal Medical Biological Agency, Laboratory for advanced molecular diagnostics of human diseases.	119121, Moscow, Russia, Pogodinskaya str. 10	LQ-23276_S342/2022
123333	csp_omicron.fasta	hCoV-19/Russia/MOW-CSP-LQ-23279_S343/2022	betacoronavirus	Original	2022-01-29	Europe/Russia/Moscow/Moscow	Human	unknown	unknown	unknown	Illumina NextSeq	bwa mapping + consensus		Chief Federal State Budgetary Healthcare Institution “Centre of Hygiene and Epidemiology” of the Federal Medical Biological Agency, Central laboratory of microbiological and clinical diagnostic tests		Federal State Budgetary Institution “Centre for Strategic Planning and Management of Biomedical Health Risks” of the Federal Medical Biological Agency, Laboratory for advanced molecular diagnostics of human diseases.	119121, Moscow, Russia, Pogodinskaya str. 10	LQ-23279_S343/2022
123333	csp_omicron.fasta	hCoV-19/Russia/MOW-CSP-LQ-23281_S344/2022	betacoronavirus	Original	2022-01-29	Europe/Russia/Moscow/Moscow	Human	unknown	unknown	unknown	Illumina NextSeq	bwa mapping + consensus		Chief Federal State Budgetary Healthcare Institution “Centre of Hygiene and Epidemiology” of the Federal Medical Biological Agency, Central laboratory of microbiological and clinical diagnostic tests		Federal State Budgetary Institution “Centre for Strategic Planning and Management of Biomedical Health Risks” of the Federal Medical Biological Agency, Laboratory for advanced molecular diagnostics of human diseases.	119121, Moscow, Russia, Pogodinskaya str. 10	LQ-23281_S344/2022
123333	csp_omicron.fasta	hCoV-19/Russia/MOW-CSP-LQ-23283_S345/2022	betacoronavirus	Original	2022-01-29	Europe/Russia/Moscow/Moscow	Human	unknown	unknown	unknown	Illumina NextSeq	bwa mapping + consensus		Chief Federal State Budgetary Healthcare Institution “Centre of Hygiene and Epidemiology” of the Federal Medical Biological Agency, Central laboratory of microbiological and clinical diagnostic tests		Federal State Budgetary Institution “Centre for Strategic Planning and Management of Biomedical Health Risks” of the Federal Medical Biological Agency, Laboratory for advanced molecular diagnostics of human diseases.	119121, Moscow, Russia, Pogodinskaya str. 10	LQ-23283_S345/2022
123333	csp_omicron.fasta	hCoV-19/Russia/MOW-CSP-LQ-23284_S346/2022	betacoronavirus	Original	2022-01-29	Europe/Russia/Moscow/Moscow	Human	unknown	unknown	unknown	Illumina NextSeq	bwa mapping + consensus		Chief Federal State Budgetary Healthcare Institution “Centre of Hygiene and Epidemiology” of the Federal Medical Biological Agency, Central laboratory of microbiological and clinical diagnostic tests		Federal State Budgetary Institution “Centre for Strategic Planning and Management of Biomedical Health Risks” of the Federal Medical Biological Agency, Laboratory for advanced molecular diagnostics of human diseases.	119121, Moscow, Russia, Pogodinskaya str. 10	LQ-23284_S346/2022
123333	csp_omicron.fasta	hCoV-19/Russia/MOW-CSP-LQ-23289_S347/2022	betacoronavirus	Original	2022-01-29	Europe/Russia/Moscow/Moscow	Human	unknown	unknown	unknown	Illumina NextSeq	bwa mapping + consensus		Chief Federal State Budgetary Healthcare Institution “Centre of Hygiene and Epidemiology” of the Federal Medical Biological Agency, Central laboratory of microbiological and clinical diagnostic tests		Federal State Budgetary Institution “Centre for Strategic Planning and Management of Biomedical Health Risks” of the Federal Medical Biological Agency, Laboratory for advanced molecular diagnostics of human diseases.	119121, Moscow, Russia, Pogodinskaya str. 10	LQ-23289_S347/2022
123333	csp_omicron.fasta	hCoV-19/Russia/MOW-CSP-LQ-23299_S348/2022	betacoronavirus	Original	2022-01-29	Europe/Russia/Moscow/Moscow	Human	unknown	unknown	unknown	Illumina NextSeq	bwa mapping + consensus		Chief Federal State Budgetary Healthcare Institution “Centre of Hygiene and Epidemiology” of the Federal Medical Biological Agency, Central laboratory of microbiological and clinical diagnostic tests		Federal State Budgetary Institution “Centre for Strategic Planning and Management of Biomedical Health Risks” of the Federal Medical Biological Agency, Laboratory for advanced molecular diagnostics of human diseases.	119121, Moscow, Russia, Pogodinskaya str. 10	LQ-23299_S348/2022
123333	csp_omicron.fasta	hCoV-19/Russia/MOW-CSP-LQ-23316_S349/2022	betacoronavirus	Original	2022-01-29	Europe/Russia/Moscow/Moscow	Human	unknown	unknown	unknown	Illumina NextSeq	bwa mapping + consensus		Chief Federal State Budgetary Healthcare Institution “Centre of Hygiene and Epidemiology” of the Federal Medical Biological Agency, Central laboratory of microbiological and clinical diagnostic tests		Federal State Budgetary Institution “Centre for Strategic Planning and Management of Biomedical Health Risks” of the Federal Medical Biological Agency, Laboratory for advanced molecular diagnostics of human diseases.	119121, Moscow, Russia, Pogodinskaya str. 10	LQ-23316_S349/2022
123333	csp_omicron.fasta	hCoV-19/Russia/MOW-CSP-LQ-23344_S350/2022	betacoronavirus	Original	2022-01-29	Europe/Russia/Moscow/Moscow	Human	unknown	unknown	unknown	Illumina NextSeq	bwa mapping + consensus		Chief Federal State Budgetary Healthcare Institution “Centre of Hygiene and Epidemiology” of the Federal Medical Biological Agency, Central laboratory of microbiological and clinical diagnostic tests		Federal State Budgetary Institution “Centre for Strategic Planning and Management of Biomedical Health Risks” of the Federal Medical Biological Agency, Laboratory for advanced molecular diagnostics of human diseases.	119121, Moscow, Russia, Pogodinskaya str. 10	LQ-23344_S350/2022
123333	csp_omicron.fasta	hCoV-19/Russia/MOW-CSP-LQ-23367_S351/2022	betacoronavirus	Original	2022-01-29	Europe/Russia/Moscow/Moscow	Human	unknown	unknown	unknown	Illumina NextSeq	bwa mapping + consensus		Chief Federal State Budgetary Healthcare Institution “Centre of Hygiene and Epidemiology” of the Federal Medical Biological Agency, Central laboratory of microbiological and clinical diagnostic tests		Federal State Budgetary Institution “Centre for Strategic Planning and Management of Biomedical Health Risks” of the Federal Medical Biological Agency, Laboratory for advanced molecular diagnostics of human diseases.	119121, Moscow, Russia, Pogodinskaya str. 10	LQ-23367_S351/2022
123333	csp_omicron.fasta	hCoV-19/Russia/MOW-CSP-LQ-23400_S352/2022	betacoronavirus	Original	2022-01-29	Europe/Russia/Moscow/Moscow	Human	unknown	unknown	unknown	Illumina NextSeq	bwa mapping + consensus		Chief Federal State Budgetary Healthcare Institution “Centre of Hygiene and Epidemiology” of the Federal Medical Biological Agency, Central laboratory of microbiological and clinical diagnostic tests		Federal State Budgetary Institution “Centre for Strategic Planning and Management of Biomedical Health Risks” of the Federal Medical Biological Agency, Laboratory for advanced molecular diagnostics of human diseases.	119121, Moscow, Russia, Pogodinskaya str. 10	LQ-23400_S352/2022
123333	csp_omicron.fasta	hCoV-19/Russia/MOW-CSP-LQ-23409_S353/2022	betacoronavirus	Original	2022-01-29	Europe/Russia/Moscow/Moscow	Human	unknown	unknown	unknown	Illumina NextSeq	bwa mapping + consensus		Chief Federal State Budgetary Healthcare Institution “Centre of Hygiene and Epidemiology” of the Federal Medical Biological Agency, Central laboratory of microbiological and clinical diagnostic tests		Federal State Budgetary Institution “Centre for Strategic Planning and Management of Biomedical Health Risks” of the Federal Medical Biological Agency, Laboratory for advanced molecular diagnostics of human diseases.	119121, Moscow, Russia, Pogodinskaya str. 10	LQ-23409_S353/2022
123333	csp_omicron.fasta	hCoV-19/Russia/MOW-CSP-LQ-23414_S354/2022	betacoronavirus	Original	2022-01-29	Europe/Russia/Moscow/Moscow	Human	unknown	unknown	unknown	Illumina NextSeq	bwa mapping + consensus		Chief Federal State Budgetary Healthcare Institution “Centre of Hygiene and Epidemiology” of the Federal Medical Biological Agency, Central laboratory of microbiological and clinical diagnostic tests		Federal State Budgetary Institution “Centre for Strategic Planning and Management of Biomedical Health Risks” of the Federal Medical Biological Agency, Laboratory for advanced molecular diagnostics of human diseases.	119121, Moscow, Russia, Pogodinskaya str. 10	LQ-23414_S354/2022
123333	csp_omicron.fasta	hCoV-19/Russia/MOW-CSP-LQ-23416_S355/2022	betacoronavirus	Original	2022-01-29	Europe/Russia/Moscow/Moscow	Human	unknown	unknown	unknown	Illumina NextSeq	bwa mapping + consensus		Chief Federal State Budgetary Healthcare Institution “Centre of Hygiene and Epidemiology” of the Federal Medical Biological Agency, Central laboratory of microbiological and clinical diagnostic tests		Federal State Budgetary Institution “Centre for Strategic Planning and Management of Biomedical Health Risks” of the Federal Medical Biological Agency, Laboratory for advanced molecular diagnostics of human diseases.	119121, Moscow, Russia, Pogodinskaya str. 10	LQ-23416_S355/2022
123333	csp_omicron.fasta	hCoV-19/Russia/MOW-CSP-LQ-23443_S356/2022	betacoronavirus	Original	2022-01-29	Europe/Russia/Moscow/Moscow	Human	unknown	unknown	unknown	Illumina NextSeq	bwa mapping + consensus		Chief Federal State Budgetary Healthcare Institution “Centre of Hygiene and Epidemiology” of the Federal Medical Biological Agency, Central laboratory of microbiological and clinical diagnostic tests		Federal State Budgetary Institution “Centre for Strategic Planning and Management of Biomedical Health Risks” of the Federal Medical Biological Agency, Laboratory for advanced molecular diagnostics of human diseases.	119121, Moscow, Russia, Pogodinskaya str. 10	LQ-23443_S356/2022
123333	csp_omicron.fasta	hCoV-19/Russia/MOW-CSP-LQ-23453_S357/2022	betacoronavirus	Original	2022-01-29	Europe/Russia/Moscow/Moscow	Human	unknown	unknown	unknown	Illumina NextSeq	bwa mapping + consensus		Chief Federal State Budgetary Healthcare Institution “Centre of Hygiene and Epidemiology” of the Federal Medical Biological Agency, Central laboratory of microbiological and clinical diagnostic tests		Federal State Budgetary Institution “Centre for Strategic Planning and Management of Biomedical Health Risks” of the Federal Medical Biological Agency, Laboratory for advanced molecular diagnostics of human diseases.	119121, Moscow, Russia, Pogodinskaya str. 10	LQ-23453_S357/2022
123333	csp_omicron.fasta	hCoV-19/Russia/MOW-CSP-LQ-23456_S201/2022	betacoronavirus	Original	2022-01-29	Europe/Russia/Moscow/Moscow	Human	unknown	unknown	unknown	Illumina NextSeq	bwa mapping + consensus		Chief Federal State Budgetary Healthcare Institution “Centre of Hygiene and Epidemiology” of the Federal Medical Biological Agency, Central laboratory of microbiological and clinical diagnostic tests		Federal State Budgetary Institution “Centre for Strategic Planning and Management of Biomedical Health Risks” of the Federal Medical Biological Agency, Laboratory for advanced molecular diagnostics of human diseases.	119121, Moscow, Russia, Pogodinskaya str. 10	LQ-23456_S201/2022
123333	csp_omicron.fasta	hCoV-19/Russia/MOW-CSP-LQ-23460_S358/2022	betacoronavirus	Original	2022-01-29	Europe/Russia/Moscow/Moscow	Human	unknown	unknown	unknown	Illumina NextSeq	bwa mapping + consensus		Chief Federal State Budgetary Healthcare Institution “Centre of Hygiene and Epidemiology” of the Federal Medical Biological Agency, Central laboratory of microbiological and clinical diagnostic tests		Federal State Budgetary Institution “Centre for Strategic Planning and Management of Biomedical Health Risks” of the Federal Medical Biological Agency, Laboratory for advanced molecular diagnostics of human diseases.	119121, Moscow, Russia, Pogodinskaya str. 10	LQ-23460_S358/2022
123333	csp_omicron.fasta	hCoV-19/Russia/MOW-CSP-LQ-23476_S202/2022	betacoronavirus	Original	2022-01-29	Europe/Russia/Moscow/Moscow	Human	unknown	unknown	unknown	Illumina NextSeq	bwa mapping + consensus		Chief Federal State Budgetary Healthcare Institution “Centre of Hygiene and Epidemiology” of the Federal Medical Biological Agency, Central laboratory of microbiological and clinical diagnostic tests		Federal State Budgetary Institution “Centre for Strategic Planning and Management of Biomedical Health Risks” of the Federal Medical Biological Agency, Laboratory for advanced molecular diagnostics of human diseases.	119121, Moscow, Russia, Pogodinskaya str. 10	LQ-23476_S202/2022
123333	csp_omicron.fasta	hCoV-19/Russia/MOW-CSP-LQ-23507_S359/2022	betacoronavirus	Original	2022-01-29	Europe/Russia/Moscow/Moscow	Human	unknown	unknown	unknown	Illumina NextSeq	bwa mapping + consensus		Chief Federal State Budgetary Healthcare Institution “Centre of Hygiene and Epidemiology” of the Federal Medical Biological Agency, Central laboratory of microbiological and clinical diagnostic tests		Federal State Budgetary Institution “Centre for Strategic Planning and Management of Biomedical Health Risks” of the Federal Medical Biological Agency, Laboratory for advanced molecular diagnostics of human diseases.	119121, Moscow, Russia, Pogodinskaya str. 10	LQ-23507_S359/2022
123333	csp_omicron.fasta	hCoV-19/Russia/MOW-CSP-LQ-23509_S360/2022	betacoronavirus	Original	2022-01-29	Europe/Russia/Moscow/Moscow	Human	unknown	unknown	unknown	Illumina NextSeq	bwa mapping + consensus		Chief Federal State Budgetary Healthcare Institution “Centre of Hygiene and Epidemiology” of the Federal Medical Biological Agency, Central laboratory of microbiological and clinical diagnostic tests		Federal State Budgetary Institution “Centre for Strategic Planning and Management of Biomedical Health Risks” of the Federal Medical Biological Agency, Laboratory for advanced molecular diagnostics of human diseases.	119121, Moscow, Russia, Pogodinskaya str. 10	LQ-23509_S360/2022
123333	csp_omicron.fasta	hCoV-19/Russia/MOW-CSP-LQ-23510_S361/2022	betacoronavirus	Original	2022-01-29	Europe/Russia/Moscow/Moscow	Human	unknown	unknown	unknown	Illumina NextSeq	bwa mapping + consensus		Chief Federal State Budgetary Healthcare Institution “Centre of Hygiene and Epidemiology” of the Federal Medical Biological Agency, Central laboratory of microbiological and clinical diagnostic tests		Federal State Budgetary Institution “Centre for Strategic Planning and Management of Biomedical Health Risks” of the Federal Medical Biological Agency, Laboratory for advanced molecular diagnostics of human diseases.	119121, Moscow, Russia, Pogodinskaya str. 10	LQ-23510_S361/2022
123333	csp_omicron.fasta	hCoV-19/Russia/MOW-CSP-LQ-23533_S362/2022	betacoronavirus	Original	2022-01-30	Europe/Russia/Moscow/Moscow	Human	unknown	unknown	unknown	Illumina NextSeq	bwa mapping + consensus		Chief Federal State Budgetary Healthcare Institution “Centre of Hygiene and Epidemiology” of the Federal Medical Biological Agency, Central laboratory of microbiological and clinical diagnostic tests		Federal State Budgetary Institution “Centre for Strategic Planning and Management of Biomedical Health Risks” of the Federal Medical Biological Agency, Laboratory for advanced molecular diagnostics of human diseases.	119121, Moscow, Russia, Pogodinskaya str. 10	LQ-23533_S362/2022
123333	csp_omicron.fasta	hCoV-19/Russia/MOW-CSP-LQ-23543_S363/2022	betacoronavirus	Original	2022-01-30	Europe/Russia/Moscow/Moscow	Human	unknown	unknown	unknown	Illumina NextSeq	bwa mapping + consensus		Chief Federal State Budgetary Healthcare Institution “Centre of Hygiene and Epidemiology” of the Federal Medical Biological Agency, Central laboratory of microbiological and clinical diagnostic tests		Federal State Budgetary Institution “Centre for Strategic Planning and Management of Biomedical Health Risks” of the Federal Medical Biological Agency, Laboratory for advanced molecular diagnostics of human diseases.	119121, Moscow, Russia, Pogodinskaya str. 10	LQ-23543_S363/2022
123333	csp_omicron.fasta	hCoV-19/Russia/MOW-CSP-LQ-23549_S364/2022	betacoronavirus	Original	2022-01-30	Europe/Russia/Moscow/Moscow	Human	unknown	unknown	unknown	Illumina NextSeq	bwa mapping + consensus		Chief Federal State Budgetary Healthcare Institution “Centre of Hygiene and Epidemiology” of the Federal Medical Biological Agency, Central laboratory of microbiological and clinical diagnostic tests		Federal State Budgetary Institution “Centre for Strategic Planning and Management of Biomedical Health Risks” of the Federal Medical Biological Agency, Laboratory for advanced molecular diagnostics of human diseases.	119121, Moscow, Russia, Pogodinskaya str. 10	LQ-23549_S364/2022
123333	csp_omicron.fasta	hCoV-19/Russia/MOW-CSP-LQ-23552_S203/2022	betacoronavirus	Original	2022-01-30	Europe/Russia/Moscow/Moscow	Human	unknown	unknown	unknown	Illumina NextSeq	bwa mapping + consensus		Chief Federal State Budgetary Healthcare Institution “Centre of Hygiene and Epidemiology” of the Federal Medical Biological Agency, Central laboratory of microbiological and clinical diagnostic tests		Federal State Budgetary Institution “Centre for Strategic Planning and Management of Biomedical Health Risks” of the Federal Medical Biological Agency, Laboratory for advanced molecular diagnostics of human diseases.	119121, Moscow, Russia, Pogodinskaya str. 10	LQ-23552_S203/2022
123333	csp_omicron.fasta	hCoV-19/Russia/MOW-CSP-LQ-23553_S365/2022	betacoronavirus	Original	2022-01-30	Europe/Russia/Moscow/Moscow	Human	unknown	unknown	unknown	Illumina NextSeq	bwa mapping + consensus		Chief Federal State Budgetary Healthcare Institution “Centre of Hygiene and Epidemiology” of the Federal Medical Biological Agency, Central laboratory of microbiological and clinical diagnostic tests		Federal State Budgetary Institution “Centre for Strategic Planning and Management of Biomedical Health Risks” of the Federal Medical Biological Agency, Laboratory for advanced molecular diagnostics of human diseases.	119121, Moscow, Russia, Pogodinskaya str. 10	LQ-23553_S365/2022
123333	csp_omicron.fasta	hCoV-19/Russia/MOW-CSP-LQ-23556_S366/2022	betacoronavirus	Original	2022-01-30	Europe/Russia/Moscow/Moscow	Human	unknown	unknown	unknown	Illumina NextSeq	bwa mapping + consensus		Chief Federal State Budgetary Healthcare Institution “Centre of Hygiene and Epidemiology” of the Federal Medical Biological Agency, Central laboratory of microbiological and clinical diagnostic tests		Federal State Budgetary Institution “Centre for Strategic Planning and Management of Biomedical Health Risks” of the Federal Medical Biological Agency, Laboratory for advanced molecular diagnostics of human diseases.	119121, Moscow, Russia, Pogodinskaya str. 10	LQ-23556_S366/2022
123333	csp_omicron.fasta	hCoV-19/Russia/MOW-CSP-LQ-23566_S367/2022	betacoronavirus	Original	2022-01-30	Europe/Russia/Moscow/Moscow	Human	unknown	unknown	unknown	Illumina NextSeq	bwa mapping + consensus		Chief Federal State Budgetary Healthcare Institution “Centre of Hygiene and Epidemiology” of the Federal Medical Biological Agency, Central laboratory of microbiological and clinical diagnostic tests		Federal State Budgetary Institution “Centre for Strategic Planning and Management of Biomedical Health Risks” of the Federal Medical Biological Agency, Laboratory for advanced molecular diagnostics of human diseases.	119121, Moscow, Russia, Pogodinskaya str. 10	LQ-23566_S367/2022
123333	csp_omicron.fasta	hCoV-19/Russia/MOW-CSP-LQ-23567_S368/2022	betacoronavirus	Original	2022-01-30	Europe/Russia/Moscow/Moscow	Human	unknown	unknown	unknown	Illumina NextSeq	bwa mapping + consensus		Chief Federal State Budgetary Healthcare Institution “Centre of Hygiene and Epidemiology” of the Federal Medical Biological Agency, Central laboratory of microbiological and clinical diagnostic tests		Federal State Budgetary Institution “Centre for Strategic Planning and Management of Biomedical Health Risks” of the Federal Medical Biological Agency, Laboratory for advanced molecular diagnostics of human diseases.	119121, Moscow, Russia, Pogodinskaya str. 10	LQ-23567_S368/2022
123333	csp_omicron.fasta	hCoV-19/Russia/MOW-CSP-LQ-23574_S369/2022	betacoronavirus	Original	2022-01-30	Europe/Russia/Moscow/Moscow	Human	unknown	unknown	unknown	Illumina NextSeq	bwa mapping + consensus		Chief Federal State Budgetary Healthcare Institution “Centre of Hygiene and Epidemiology” of the Federal Medical Biological Agency, Central laboratory of microbiological and clinical diagnostic tests		Federal State Budgetary Institution “Centre for Strategic Planning and Management of Biomedical Health Risks” of the Federal Medical Biological Agency, Laboratory for advanced molecular diagnostics of human diseases.	119121, Moscow, Russia, Pogodinskaya str. 10	LQ-23574_S369/2022
123333	csp_omicron.fasta	hCoV-19/Russia/MOW-CSP-LQ-23578_S370/2022	betacoronavirus	Original	2022-01-30	Europe/Russia/Moscow/Moscow	Human	unknown	unknown	unknown	Illumina NextSeq	bwa mapping + consensus		Chief Federal State Budgetary Healthcare Institution “Centre of Hygiene and Epidemiology” of the Federal Medical Biological Agency, Central laboratory of microbiological and clinical diagnostic tests		Federal State Budgetary Institution “Centre for Strategic Planning and Management of Biomedical Health Risks” of the Federal Medical Biological Agency, Laboratory for advanced molecular diagnostics of human diseases.	119121, Moscow, Russia, Pogodinskaya str. 10	LQ-23578_S370/2022
123333	csp_omicron.fasta	hCoV-19/Russia/MOW-CSP-LQ-23581_S371/2022	betacoronavirus	Original	2022-01-30	Europe/Russia/Moscow/Moscow	Human	unknown	unknown	unknown	Illumina NextSeq	bwa mapping + consensus		Chief Federal State Budgetary Healthcare Institution “Centre of Hygiene and Epidemiology” of the Federal Medical Biological Agency, Central laboratory of microbiological and clinical diagnostic tests		Federal State Budgetary Institution “Centre for Strategic Planning and Management of Biomedical Health Risks” of the Federal Medical Biological Agency, Laboratory for advanced molecular diagnostics of human diseases.	119121, Moscow, Russia, Pogodinskaya str. 10	LQ-23581_S371/2022
123333	csp_omicron.fasta	hCoV-19/Russia/MOW-CSP-LQ-23587_S216/2022	betacoronavirus	Original	2022-01-30	Europe/Russia/Moscow/Moscow	Human	unknown	unknown	unknown	Illumina NextSeq	bwa mapping + consensus		Chief Federal State Budgetary Healthcare Institution “Centre of Hygiene and Epidemiology” of the Federal Medical Biological Agency, Central laboratory of microbiological and clinical diagnostic tests		Federal State Budgetary Institution “Centre for Strategic Planning and Management of Biomedical Health Risks” of the Federal Medical Biological Agency, Laboratory for advanced molecular diagnostics of human diseases.	119121, Moscow, Russia, Pogodinskaya str. 10	LQ-23587_S216/2022
123333	csp_omicron.fasta	hCoV-19/Russia/MOW-CSP-LQ-23589_S217/2022	betacoronavirus	Original	2022-01-30	Europe/Russia/Moscow/Moscow	Human	unknown	unknown	unknown	Illumina NextSeq	bwa mapping + consensus		Chief Federal State Budgetary Healthcare Institution “Centre of Hygiene and Epidemiology” of the Federal Medical Biological Agency, Central laboratory of microbiological and clinical diagnostic tests		Federal State Budgetary Institution “Centre for Strategic Planning and Management of Biomedical Health Risks” of the Federal Medical Biological Agency, Laboratory for advanced molecular diagnostics of human diseases.	119121, Moscow, Russia, Pogodinskaya str. 10	LQ-23589_S217/2022
123333	csp_omicron.fasta	hCoV-19/Russia/MOW-CSP-LQ-23591_S218/2022	betacoronavirus	Original	2022-01-30	Europe/Russia/Moscow/Moscow	Human	unknown	unknown	unknown	Illumina NextSeq	bwa mapping + consensus		Chief Federal State Budgetary Healthcare Institution “Centre of Hygiene and Epidemiology” of the Federal Medical Biological Agency, Central laboratory of microbiological and clinical diagnostic tests		Federal State Budgetary Institution “Centre for Strategic Planning and Management of Biomedical Health Risks” of the Federal Medical Biological Agency, Laboratory for advanced molecular diagnostics of human diseases.	119121, Moscow, Russia, Pogodinskaya str. 10	LQ-23591_S218/2022
123333	csp_omicron.fasta	hCoV-19/Russia/MOW-CSP-LQ-23596_S219/2022	betacoronavirus	Original	2022-01-30	Europe/Russia/Moscow/Moscow	Human	unknown	unknown	unknown	Illumina NextSeq	bwa mapping + consensus		Chief Federal State Budgetary Healthcare Institution “Centre of Hygiene and Epidemiology” of the Federal Medical Biological Agency, Central laboratory of microbiological and clinical diagnostic tests		Federal State Budgetary Institution “Centre for Strategic Planning and Management of Biomedical Health Risks” of the Federal Medical Biological Agency, Laboratory for advanced molecular diagnostics of human diseases.	119121, Moscow, Russia, Pogodinskaya str. 10	LQ-23596_S219/2022
123333	csp_omicron.fasta	hCoV-19/Russia/MOW-CSP-LQ-23600_S220/2022	betacoronavirus	Original	2022-01-30	Europe/Russia/Moscow/Moscow	Human	unknown	unknown	unknown	Illumina NextSeq	bwa mapping + consensus		Chief Federal State Budgetary Healthcare Institution “Centre of Hygiene and Epidemiology” of the Federal Medical Biological Agency, Central laboratory of microbiological and clinical diagnostic tests		Federal State Budgetary Institution “Centre for Strategic Planning and Management of Biomedical Health Risks” of the Federal Medical Biological Agency, Laboratory for advanced molecular diagnostics of human diseases.	119121, Moscow, Russia, Pogodinskaya str. 10	LQ-23600_S220/2022
123333	csp_omicron.fasta	hCoV-19/Russia/MOW-CSP-LQ-23604_S221/2022	betacoronavirus	Original	2022-01-30	Europe/Russia/Moscow/Moscow	Human	unknown	unknown	unknown	Illumina NextSeq	bwa mapping + consensus		Chief Federal State Budgetary Healthcare Institution “Centre of Hygiene and Epidemiology” of the Federal Medical Biological Agency, Central laboratory of microbiological and clinical diagnostic tests		Federal State Budgetary Institution “Centre for Strategic Planning and Management of Biomedical Health Risks” of the Federal Medical Biological Agency, Laboratory for advanced molecular diagnostics of human diseases.	119121, Moscow, Russia, Pogodinskaya str. 10	LQ-23604_S221/2022
123333	csp_omicron.fasta	hCoV-19/Russia/MOW-CSP-LQ-23611_S222/2022	betacoronavirus	Original	2022-01-30	Europe/Russia/Moscow/Moscow	Human	unknown	unknown	unknown	Illumina NextSeq	bwa mapping + consensus		Chief Federal State Budgetary Healthcare Institution “Centre of Hygiene and Epidemiology” of the Federal Medical Biological Agency, Central laboratory of microbiological and clinical diagnostic tests		Federal State Budgetary Institution “Centre for Strategic Planning and Management of Biomedical Health Risks” of the Federal Medical Biological Agency, Laboratory for advanced molecular diagnostics of human diseases.	119121, Moscow, Russia, Pogodinskaya str. 10	LQ-23611_S222/2022
123333	csp_omicron.fasta	hCoV-19/Russia/MOW-CSP-LQ-23622_S223/2022	betacoronavirus	Original	2022-01-30	Europe/Russia/Moscow/Moscow	Human	unknown	unknown	unknown	Illumina NextSeq	bwa mapping + consensus		Chief Federal State Budgetary Healthcare Institution “Centre of Hygiene and Epidemiology” of the Federal Medical Biological Agency, Central laboratory of microbiological and clinical diagnostic tests		Federal State Budgetary Institution “Centre for Strategic Planning and Management of Biomedical Health Risks” of the Federal Medical Biological Agency, Laboratory for advanced molecular diagnostics of human diseases.	119121, Moscow, Russia, Pogodinskaya str. 10	LQ-23622_S223/2022
123333	csp_omicron.fasta	hCoV-19/Russia/MOW-CSP-LQ-23624_S224/2022	betacoronavirus	Original	2022-01-30	Europe/Russia/Moscow/Moscow	Human	unknown	unknown	unknown	Illumina NextSeq	bwa mapping + consensus		Chief Federal State Budgetary Healthcare Institution “Centre of Hygiene and Epidemiology” of the Federal Medical Biological Agency, Central laboratory of microbiological and clinical diagnostic tests		Federal State Budgetary Institution “Centre for Strategic Planning and Management of Biomedical Health Risks” of the Federal Medical Biological Agency, Laboratory for advanced molecular diagnostics of human diseases.	119121, Moscow, Russia, Pogodinskaya str. 10	LQ-23624_S224/2022
123333	csp_omicron.fasta	hCoV-19/Russia/MOW-CSP-LQ-23627_S225/2022	betacoronavirus	Original	2022-01-30	Europe/Russia/Moscow/Moscow	Human	unknown	unknown	unknown	Illumina NextSeq	bwa mapping + consensus		Chief Federal State Budgetary Healthcare Institution “Centre of Hygiene and Epidemiology” of the Federal Medical Biological Agency, Central laboratory of microbiological and clinical diagnostic tests		Federal State Budgetary Institution “Centre for Strategic Planning and Management of Biomedical Health Risks” of the Federal Medical Biological Agency, Laboratory for advanced molecular diagnostics of human diseases.	119121, Moscow, Russia, Pogodinskaya str. 10	LQ-23627_S225/2022
123333	csp_omicron.fasta	hCoV-19/Russia/MOW-CSP-LQ-23630_S226/2022	betacoronavirus	Original	2022-01-30	Europe/Russia/Moscow/Moscow	Human	unknown	unknown	unknown	Illumina NextSeq	bwa mapping + consensus		Chief Federal State Budgetary Healthcare Institution “Centre of Hygiene and Epidemiology” of the Federal Medical Biological Agency, Central laboratory of microbiological and clinical diagnostic tests		Federal State Budgetary Institution “Centre for Strategic Planning and Management of Biomedical Health Risks” of the Federal Medical Biological Agency, Laboratory for advanced molecular diagnostics of human diseases.	119121, Moscow, Russia, Pogodinskaya str. 10	LQ-23630_S226/2022
123333	csp_omicron.fasta	hCoV-19/Russia/MOW-CSP-LQ-23647_S228/2022	betacoronavirus	Original	2022-01-30	Europe/Russia/Moscow/Moscow	Human	unknown	unknown	unknown	Illumina NextSeq	bwa mapping + consensus		Chief Federal State Budgetary Healthcare Institution “Centre of Hygiene and Epidemiology” of the Federal Medical Biological Agency, Central laboratory of microbiological and clinical diagnostic tests		Federal State Budgetary Institution “Centre for Strategic Planning and Management of Biomedical Health Risks” of the Federal Medical Biological Agency, Laboratory for advanced molecular diagnostics of human diseases.	119121, Moscow, Russia, Pogodinskaya str. 10	LQ-23647_S228/2022
123333	csp_omicron.fasta	hCoV-19/Russia/MOW-CSP-LQ-23650_S229/2022	betacoronavirus	Original	2022-01-30	Europe/Russia/Moscow/Moscow	Human	unknown	unknown	unknown	Illumina NextSeq	bwa mapping + consensus		Chief Federal State Budgetary Healthcare Institution “Centre of Hygiene and Epidemiology” of the Federal Medical Biological Agency, Central laboratory of microbiological and clinical diagnostic tests		Federal State Budgetary Institution “Centre for Strategic Planning and Management of Biomedical Health Risks” of the Federal Medical Biological Agency, Laboratory for advanced molecular diagnostics of human diseases.	119121, Moscow, Russia, Pogodinskaya str. 10	LQ-23650_S229/2022
123333	csp_omicron.fasta	hCoV-19/Russia/MOW-CSP-LQ-23651_S206/2022	betacoronavirus	Original	2022-01-30	Europe/Russia/Moscow/Moscow	Human	unknown	unknown	unknown	Illumina NextSeq	bwa mapping + consensus		Chief Federal State Budgetary Healthcare Institution “Centre of Hygiene and Epidemiology” of the Federal Medical Biological Agency, Central laboratory of microbiological and clinical diagnostic tests		Federal State Budgetary Institution “Centre for Strategic Planning and Management of Biomedical Health Risks” of the Federal Medical Biological Agency, Laboratory for advanced molecular diagnostics of human diseases.	119121, Moscow, Russia, Pogodinskaya str. 10	LQ-23651_S206/2022
123333	csp_omicron.fasta	hCoV-19/Russia/MOW-CSP-LQ-23653_S230/2022	betacoronavirus	Original	2022-01-30	Europe/Russia/Moscow/Moscow	Human	unknown	unknown	unknown	Illumina NextSeq	bwa mapping + consensus		Chief Federal State Budgetary Healthcare Institution “Centre of Hygiene and Epidemiology” of the Federal Medical Biological Agency, Central laboratory of microbiological and clinical diagnostic tests		Federal State Budgetary Institution “Centre for Strategic Planning and Management of Biomedical Health Risks” of the Federal Medical Biological Agency, Laboratory for advanced molecular diagnostics of human diseases.	119121, Moscow, Russia, Pogodinskaya str. 10	LQ-23653_S230/2022
123333	csp_omicron.fasta	hCoV-19/Russia/MOW-CSP-LQ-23654_S231/2022	betacoronavirus	Original	2022-01-30	Europe/Russia/Moscow/Moscow	Human	unknown	unknown	unknown	Illumina NextSeq	bwa mapping + consensus		Chief Federal State Budgetary Healthcare Institution “Centre of Hygiene and Epidemiology” of the Federal Medical Biological Agency, Central laboratory of microbiological and clinical diagnostic tests		Federal State Budgetary Institution “Centre for Strategic Planning and Management of Biomedical Health Risks” of the Federal Medical Biological Agency, Laboratory for advanced molecular diagnostics of human diseases.	119121, Moscow, Russia, Pogodinskaya str. 10	LQ-23654_S231/2022
123333	csp_omicron.fasta	hCoV-19/Russia/MOW-CSP-LQ-23658_S232/2022	betacoronavirus	Original	2022-01-30	Europe/Russia/Moscow/Moscow	Human	unknown	unknown	unknown	Illumina NextSeq	bwa mapping + consensus		Chief Federal State Budgetary Healthcare Institution “Centre of Hygiene and Epidemiology” of the Federal Medical Biological Agency, Central laboratory of microbiological and clinical diagnostic tests		Federal State Budgetary Institution “Centre for Strategic Planning and Management of Biomedical Health Risks” of the Federal Medical Biological Agency, Laboratory for advanced molecular diagnostics of human diseases.	119121, Moscow, Russia, Pogodinskaya str. 10	LQ-23658_S232/2022
123333	csp_omicron.fasta	hCoV-19/Russia/MOW-CSP-LQ-23659_S233/2022	betacoronavirus	Original	2022-01-30	Europe/Russia/Moscow/Moscow	Human	unknown	unknown	unknown	Illumina NextSeq	bwa mapping + consensus		Chief Federal State Budgetary Healthcare Institution “Centre of Hygiene and Epidemiology” of the Federal Medical Biological Agency, Central laboratory of microbiological and clinical diagnostic tests		Federal State Budgetary Institution “Centre for Strategic Planning and Management of Biomedical Health Risks” of the Federal Medical Biological Agency, Laboratory for advanced molecular diagnostics of human diseases.	119121, Moscow, Russia, Pogodinskaya str. 10	LQ-23659_S233/2022
123333	csp_omicron.fasta	hCoV-19/Russia/MOW-CSP-LQ-23664_S234/2022	betacoronavirus	Original	2022-01-30	Europe/Russia/Moscow/Moscow	Human	unknown	unknown	unknown	Illumina NextSeq	bwa mapping + consensus		Chief Federal State Budgetary Healthcare Institution “Centre of Hygiene and Epidemiology” of the Federal Medical Biological Agency, Central laboratory of microbiological and clinical diagnostic tests		Federal State Budgetary Institution “Centre for Strategic Planning and Management of Biomedical Health Risks” of the Federal Medical Biological Agency, Laboratory for advanced molecular diagnostics of human diseases.	119121, Moscow, Russia, Pogodinskaya str. 10	LQ-23664_S234/2022
123333	csp_omicron.fasta	hCoV-19/Russia/MOW-CSP-LQ-23673_S207/2022	betacoronavirus	Original	2022-01-30	Europe/Russia/Moscow/Moscow	Human	unknown	unknown	unknown	Illumina NextSeq	bwa mapping + consensus		Chief Federal State Budgetary Healthcare Institution “Centre of Hygiene and Epidemiology” of the Federal Medical Biological Agency, Central laboratory of microbiological and clinical diagnostic tests		Federal State Budgetary Institution “Centre for Strategic Planning and Management of Biomedical Health Risks” of the Federal Medical Biological Agency, Laboratory for advanced molecular diagnostics of human diseases.	119121, Moscow, Russia, Pogodinskaya str. 10	LQ-23673_S207/2022
123333	csp_omicron.fasta	hCoV-19/Russia/MOW-CSP-LQ-23695_S236/2022	betacoronavirus	Original	2022-01-30	Europe/Russia/Moscow/Moscow	Human	unknown	unknown	unknown	Illumina NextSeq	bwa mapping + consensus		Chief Federal State Budgetary Healthcare Institution “Centre of Hygiene and Epidemiology” of the Federal Medical Biological Agency, Central laboratory of microbiological and clinical diagnostic tests		Federal State Budgetary Institution “Centre for Strategic Planning and Management of Biomedical Health Risks” of the Federal Medical Biological Agency, Laboratory for advanced molecular diagnostics of human diseases.	119121, Moscow, Russia, Pogodinskaya str. 10	LQ-23695_S236/2022
123333	csp_omicron.fasta	hCoV-19/Russia/MOW-CSP-LQ-23696_S208/2022	betacoronavirus	Original	2022-01-30	Europe/Russia/Moscow/Moscow	Human	unknown	unknown	unknown	Illumina NextSeq	bwa mapping + consensus		Chief Federal State Budgetary Healthcare Institution “Centre of Hygiene and Epidemiology” of the Federal Medical Biological Agency, Central laboratory of microbiological and clinical diagnostic tests		Federal State Budgetary Institution “Centre for Strategic Planning and Management of Biomedical Health Risks” of the Federal Medical Biological Agency, Laboratory for advanced molecular diagnostics of human diseases.	119121, Moscow, Russia, Pogodinskaya str. 10	LQ-23696_S208/2022
123333	csp_omicron.fasta	hCoV-19/Russia/MOW-CSP-LQ-23699_S209/2022	betacoronavirus	Original	2022-01-30	Europe/Russia/Moscow/Moscow	Human	unknown	unknown	unknown	Illumina NextSeq	bwa mapping + consensus		Chief Federal State Budgetary Healthcare Institution “Centre of Hygiene and Epidemiology” of the Federal Medical Biological Agency, Central laboratory of microbiological and clinical diagnostic tests		Federal State Budgetary Institution “Centre for Strategic Planning and Management of Biomedical Health Risks” of the Federal Medical Biological Agency, Laboratory for advanced molecular diagnostics of human diseases.	119121, Moscow, Russia, Pogodinskaya str. 10	LQ-23699_S209/2022
123333	csp_omicron.fasta	hCoV-19/Russia/MOW-CSP-LQ-23700_S237/2022	betacoronavirus	Original	2022-01-30	Europe/Russia/Moscow/Moscow	Human	unknown	unknown	unknown	Illumina NextSeq	bwa mapping + consensus		Chief Federal State Budgetary Healthcare Institution “Centre of Hygiene and Epidemiology” of the Federal Medical Biological Agency, Central laboratory of microbiological and clinical diagnostic tests		Federal State Budgetary Institution “Centre for Strategic Planning and Management of Biomedical Health Risks” of the Federal Medical Biological Agency, Laboratory for advanced molecular diagnostics of human diseases.	119121, Moscow, Russia, Pogodinskaya str. 10	LQ-23700_S237/2022
123333	csp_omicron.fasta	hCoV-19/Russia/MOW-CSP-LQ-23702_S238/2022	betacoronavirus	Original	2022-01-30	Europe/Russia/Moscow/Moscow	Human	unknown	unknown	unknown	Illumina NextSeq	bwa mapping + consensus		Chief Federal State Budgetary Healthcare Institution “Centre of Hygiene and Epidemiology” of the Federal Medical Biological Agency, Central laboratory of microbiological and clinical diagnostic tests		Federal State Budgetary Institution “Centre for Strategic Planning and Management of Biomedical Health Risks” of the Federal Medical Biological Agency, Laboratory for advanced molecular diagnostics of human diseases.	119121, Moscow, Russia, Pogodinskaya str. 10	LQ-23702_S238/2022
123333	csp_omicron.fasta	hCoV-19/Russia/MOW-CSP-LQ-23707_S210/2022	betacoronavirus	Original	2022-01-30	Europe/Russia/Moscow/Moscow	Human	unknown	unknown	unknown	Illumina NextSeq	bwa mapping + consensus		Chief Federal State Budgetary Healthcare Institution “Centre of Hygiene and Epidemiology” of the Federal Medical Biological Agency, Central laboratory of microbiological and clinical diagnostic tests		Federal State Budgetary Institution “Centre for Strategic Planning and Management of Biomedical Health Risks” of the Federal Medical Biological Agency, Laboratory for advanced molecular diagnostics of human diseases.	119121, Moscow, Russia, Pogodinskaya str. 10	LQ-23707_S210/2022
123333	csp_omicron.fasta	hCoV-19/Russia/MOW-CSP-LQ-23713_S239/2022	betacoronavirus	Original	2022-01-30	Europe/Russia/Moscow/Moscow	Human	unknown	unknown	unknown	Illumina NextSeq	bwa mapping + consensus		Chief Federal State Budgetary Healthcare Institution “Centre of Hygiene and Epidemiology” of the Federal Medical Biological Agency, Central laboratory of microbiological and clinical diagnostic tests		Federal State Budgetary Institution “Centre for Strategic Planning and Management of Biomedical Health Risks” of the Federal Medical Biological Agency, Laboratory for advanced molecular diagnostics of human diseases.	119121, Moscow, Russia, Pogodinskaya str. 10	LQ-23713_S239/2022
123333	csp_omicron.fasta	hCoV-19/Russia/MOW-CSP-LQ-23716_S211/2022	betacoronavirus	Original	2022-01-30	Europe/Russia/Moscow/Moscow	Human	unknown	unknown	unknown	Illumina NextSeq	bwa mapping + consensus		Chief Federal State Budgetary Healthcare Institution “Centre of Hygiene and Epidemiology” of the Federal Medical Biological Agency, Central laboratory of microbiological and clinical diagnostic tests		Federal State Budgetary Institution “Centre for Strategic Planning and Management of Biomedical Health Risks” of the Federal Medical Biological Agency, Laboratory for advanced molecular diagnostics of human diseases.	119121, Moscow, Russia, Pogodinskaya str. 10	LQ-23716_S211/2022
123333	csp_omicron.fasta	hCoV-19/Russia/MOW-CSP-LQ-23717_S240/2022	betacoronavirus	Original	2022-01-30	Europe/Russia/Moscow/Moscow	Human	unknown	unknown	unknown	Illumina NextSeq	bwa mapping + consensus		Chief Federal State Budgetary Healthcare Institution “Centre of Hygiene and Epidemiology” of the Federal Medical Biological Agency, Central laboratory of microbiological and clinical diagnostic tests		Federal State Budgetary Institution “Centre for Strategic Planning and Management of Biomedical Health Risks” of the Federal Medical Biological Agency, Laboratory for advanced molecular diagnostics of human diseases.	119121, Moscow, Russia, Pogodinskaya str. 10	LQ-23717_S240/2022
123333	csp_omicron.fasta	hCoV-19/Russia/MOW-CSP-LQ-23729_S242/2022	betacoronavirus	Original	2022-01-30	Europe/Russia/Moscow/Moscow	Human	unknown	unknown	unknown	Illumina NextSeq	bwa mapping + consensus		Chief Federal State Budgetary Healthcare Institution “Centre of Hygiene and Epidemiology” of the Federal Medical Biological Agency, Central laboratory of microbiological and clinical diagnostic tests		Federal State Budgetary Institution “Centre for Strategic Planning and Management of Biomedical Health Risks” of the Federal Medical Biological Agency, Laboratory for advanced molecular diagnostics of human diseases.	119121, Moscow, Russia, Pogodinskaya str. 10	LQ-23729_S242/2022
123333	csp_omicron.fasta	hCoV-19/Russia/MOW-CSP-LQ-23739_S244/2022	betacoronavirus	Original	2022-01-30	Europe/Russia/Moscow/Moscow	Human	unknown	unknown	unknown	Illumina NextSeq	bwa mapping + consensus		Chief Federal State Budgetary Healthcare Institution “Centre of Hygiene and Epidemiology” of the Federal Medical Biological Agency, Central laboratory of microbiological and clinical diagnostic tests		Federal State Budgetary Institution “Centre for Strategic Planning and Management of Biomedical Health Risks” of the Federal Medical Biological Agency, Laboratory for advanced molecular diagnostics of human diseases.	119121, Moscow, Russia, Pogodinskaya str. 10	LQ-23739_S244/2022
123333	csp_omicron.fasta	hCoV-19/Russia/MOW-CSP-LQ-23740_S245/2022	betacoronavirus	Original	2022-01-30	Europe/Russia/Moscow/Moscow	Human	unknown	unknown	unknown	Illumina NextSeq	bwa mapping + consensus		Chief Federal State Budgetary Healthcare Institution “Centre of Hygiene and Epidemiology” of the Federal Medical Biological Agency, Central laboratory of microbiological and clinical diagnostic tests		Federal State Budgetary Institution “Centre for Strategic Planning and Management of Biomedical Health Risks” of the Federal Medical Biological Agency, Laboratory for advanced molecular diagnostics of human diseases.	119121, Moscow, Russia, Pogodinskaya str. 10	LQ-23740_S245/2022
123333	csp_omicron.fasta	hCoV-19/Russia/MOW-CSP-LQ-23753_S246/2022	betacoronavirus	Original	2022-01-30	Europe/Russia/Moscow/Moscow	Human	unknown	unknown	unknown	Illumina NextSeq	bwa mapping + consensus		Chief Federal State Budgetary Healthcare Institution “Centre of Hygiene and Epidemiology” of the Federal Medical Biological Agency, Central laboratory of microbiological and clinical diagnostic tests		Federal State Budgetary Institution “Centre for Strategic Planning and Management of Biomedical Health Risks” of the Federal Medical Biological Agency, Laboratory for advanced molecular diagnostics of human diseases.	119121, Moscow, Russia, Pogodinskaya str. 10	LQ-23753_S246/2022
123333	csp_omicron.fasta	hCoV-19/Russia/MOW-CSP-LQ-23754_S247/2022	betacoronavirus	Original	2022-01-30	Europe/Russia/Moscow/Moscow	Human	unknown	unknown	unknown	Illumina NextSeq	bwa mapping + consensus		Chief Federal State Budgetary Healthcare Institution “Centre of Hygiene and Epidemiology” of the Federal Medical Biological Agency, Central laboratory of microbiological and clinical diagnostic tests		Federal State Budgetary Institution “Centre for Strategic Planning and Management of Biomedical Health Risks” of the Federal Medical Biological Agency, Laboratory for advanced molecular diagnostics of human diseases.	119121, Moscow, Russia, Pogodinskaya str. 10	LQ-23754_S247/2022
123333	csp_omicron.fasta	hCoV-19/Russia/MOW-CSP-LQ-23758_S248/2022	betacoronavirus	Original	2022-01-30	Europe/Russia/Moscow/Moscow	Human	unknown	unknown	unknown	Illumina NextSeq	bwa mapping + consensus		Chief Federal State Budgetary Healthcare Institution “Centre of Hygiene and Epidemiology” of the Federal Medical Biological Agency, Central laboratory of microbiological and clinical diagnostic tests		Federal State Budgetary Institution “Centre for Strategic Planning and Management of Biomedical Health Risks” of the Federal Medical Biological Agency, Laboratory for advanced molecular diagnostics of human diseases.	119121, Moscow, Russia, Pogodinskaya str. 10	LQ-23758_S248/2022
123333	csp_omicron.fasta	hCoV-19/Russia/MOW-CSP-LQ-23764_S249/2022	betacoronavirus	Original	2022-01-30	Europe/Russia/Moscow/Moscow	Human	unknown	unknown	unknown	Illumina NextSeq	bwa mapping + consensus		Chief Federal State Budgetary Healthcare Institution “Centre of Hygiene and Epidemiology” of the Federal Medical Biological Agency, Central laboratory of microbiological and clinical diagnostic tests		Federal State Budgetary Institution “Centre for Strategic Planning and Management of Biomedical Health Risks” of the Federal Medical Biological Agency, Laboratory for advanced molecular diagnostics of human diseases.	119121, Moscow, Russia, Pogodinskaya str. 10	LQ-23764_S249/2022
123333	csp_omicron.fasta	hCoV-19/Russia/MOW-CSP-LQ-23772_S212/2022	betacoronavirus	Original	2022-01-30	Europe/Russia/Moscow/Moscow	Human	unknown	unknown	unknown	Illumina NextSeq	bwa mapping + consensus		Chief Federal State Budgetary Healthcare Institution “Centre of Hygiene and Epidemiology” of the Federal Medical Biological Agency, Central laboratory of microbiological and clinical diagnostic tests		Federal State Budgetary Institution “Centre for Strategic Planning and Management of Biomedical Health Risks” of the Federal Medical Biological Agency, Laboratory for advanced molecular diagnostics of human diseases.	119121, Moscow, Russia, Pogodinskaya str. 10	LQ-23772_S212/2022
123333	csp_omicron.fasta	hCoV-19/Russia/MOW-CSP-LQ-23774_S250/2022	betacoronavirus	Original	2022-01-30	Europe/Russia/Moscow/Moscow	Human	unknown	unknown	unknown	Illumina NextSeq	bwa mapping + consensus		Chief Federal State Budgetary Healthcare Institution “Centre of Hygiene and Epidemiology” of the Federal Medical Biological Agency, Central laboratory of microbiological and clinical diagnostic tests		Federal State Budgetary Institution “Centre for Strategic Planning and Management of Biomedical Health Risks” of the Federal Medical Biological Agency, Laboratory for advanced molecular diagnostics of human diseases.	119121, Moscow, Russia, Pogodinskaya str. 10	LQ-23774_S250/2022
123333	csp_omicron.fasta	hCoV-19/Russia/MOW-CSP-LQ-23820_S251/2022	betacoronavirus	Original	2022-01-30	Europe/Russia/Moscow/Moscow	Human	unknown	unknown	unknown	Illumina NextSeq	bwa mapping + consensus		Chief Federal State Budgetary Healthcare Institution “Centre of Hygiene and Epidemiology” of the Federal Medical Biological Agency, Central laboratory of microbiological and clinical diagnostic tests		Federal State Budgetary Institution “Centre for Strategic Planning and Management of Biomedical Health Risks” of the Federal Medical Biological Agency, Laboratory for advanced molecular diagnostics of human diseases.	119121, Moscow, Russia, Pogodinskaya str. 10	LQ-23820_S251/2022
123333	csp_omicron.fasta	hCoV-19/Russia/MOW-CSP-LQ-23822_S252/2022	betacoronavirus	Original	2022-01-30	Europe/Russia/Moscow/Moscow	Human	unknown	unknown	unknown	Illumina NextSeq	bwa mapping + consensus		Chief Federal State Budgetary Healthcare Institution “Centre of Hygiene and Epidemiology” of the Federal Medical Biological Agency, Central laboratory of microbiological and clinical diagnostic tests		Federal State Budgetary Institution “Centre for Strategic Planning and Management of Biomedical Health Risks” of the Federal Medical Biological Agency, Laboratory for advanced molecular diagnostics of human diseases.	119121, Moscow, Russia, Pogodinskaya str. 10	LQ-23822_S252/2022
123333	csp_omicron.fasta	hCoV-19/Russia/MOW-CSP-LQ-23825_S253/2022	betacoronavirus	Original	2022-01-30	Europe/Russia/Moscow/Moscow	Human	unknown	unknown	unknown	Illumina NextSeq	bwa mapping + consensus		Chief Federal State Budgetary Healthcare Institution “Centre of Hygiene and Epidemiology” of the Federal Medical Biological Agency, Central laboratory of microbiological and clinical diagnostic tests		Federal State Budgetary Institution “Centre for Strategic Planning and Management of Biomedical Health Risks” of the Federal Medical Biological Agency, Laboratory for advanced molecular diagnostics of human diseases.	119121, Moscow, Russia, Pogodinskaya str. 10	LQ-23825_S253/2022
123333	csp_omicron.fasta	hCoV-19/Russia/MOW-CSP-LQ-23827_S254/2022	betacoronavirus	Original	2022-01-30	Europe/Russia/Moscow/Moscow	Human	unknown	unknown	unknown	Illumina NextSeq	bwa mapping + consensus		Chief Federal State Budgetary Healthcare Institution “Centre of Hygiene and Epidemiology” of the Federal Medical Biological Agency, Central laboratory of microbiological and clinical diagnostic tests		Federal State Budgetary Institution “Centre for Strategic Planning and Management of Biomedical Health Risks” of the Federal Medical Biological Agency, Laboratory for advanced molecular diagnostics of human diseases.	119121, Moscow, Russia, Pogodinskaya str. 10	LQ-23827_S254/2022
123333	csp_omicron.fasta	hCoV-19/Russia/MOW-CSP-LQ-23836_S255/2022	betacoronavirus	Original	2022-01-30	Europe/Russia/Moscow/Moscow	Human	unknown	unknown	unknown	Illumina NextSeq	bwa mapping + consensus		Chief Federal State Budgetary Healthcare Institution “Centre of Hygiene and Epidemiology” of the Federal Medical Biological Agency, Central laboratory of microbiological and clinical diagnostic tests		Federal State Budgetary Institution “Centre for Strategic Planning and Management of Biomedical Health Risks” of the Federal Medical Biological Agency, Laboratory for advanced molecular diagnostics of human diseases.	119121, Moscow, Russia, Pogodinskaya str. 10	LQ-23836_S255/2022
123333	csp_omicron.fasta	hCoV-19/Russia/MOW-CSP-LQ-23843_S256/2022	betacoronavirus	Original	2022-01-30	Europe/Russia/Moscow/Moscow	Human	unknown	unknown	unknown	Illumina NextSeq	bwa mapping + consensus		Chief Federal State Budgetary Healthcare Institution “Centre of Hygiene and Epidemiology” of the Federal Medical Biological Agency, Central laboratory of microbiological and clinical diagnostic tests		Federal State Budgetary Institution “Centre for Strategic Planning and Management of Biomedical Health Risks” of the Federal Medical Biological Agency, Laboratory for advanced molecular diagnostics of human diseases.	119121, Moscow, Russia, Pogodinskaya str. 10	LQ-23843_S256/2022
123333	csp_omicron.fasta	hCoV-19/Russia/MOW-CSP-LQ-23846_S257/2022	betacoronavirus	Original	2022-01-30	Europe/Russia/Moscow/Moscow	Human	unknown	unknown	unknown	Illumina NextSeq	bwa mapping + consensus		Chief Federal State Budgetary Healthcare Institution “Centre of Hygiene and Epidemiology” of the Federal Medical Biological Agency, Central laboratory of microbiological and clinical diagnostic tests		Federal State Budgetary Institution “Centre for Strategic Planning and Management of Biomedical Health Risks” of the Federal Medical Biological Agency, Laboratory for advanced molecular diagnostics of human diseases.	119121, Moscow, Russia, Pogodinskaya str. 10	LQ-23846_S257/2022
123333	csp_omicron.fasta	hCoV-19/Russia/MOW-CSP-LQ-23854_S258/2022	betacoronavirus	Original	2022-01-30	Europe/Russia/Moscow/Moscow	Human	unknown	unknown	unknown	Illumina NextSeq	bwa mapping + consensus		Chief Federal State Budgetary Healthcare Institution “Centre of Hygiene and Epidemiology” of the Federal Medical Biological Agency, Central laboratory of microbiological and clinical diagnostic tests		Federal State Budgetary Institution “Centre for Strategic Planning and Management of Biomedical Health Risks” of the Federal Medical Biological Agency, Laboratory for advanced molecular diagnostics of human diseases.	119121, Moscow, Russia, Pogodinskaya str. 10	LQ-23854_S258/2022
123333	csp_omicron.fasta	hCoV-19/Russia/MOW-CSP-LQ-23862_S213/2022	betacoronavirus	Original	2022-01-30	Europe/Russia/Moscow/Moscow	Human	unknown	unknown	unknown	Illumina NextSeq	bwa mapping + consensus		Chief Federal State Budgetary Healthcare Institution “Centre of Hygiene and Epidemiology” of the Federal Medical Biological Agency, Central laboratory of microbiological and clinical diagnostic tests		Federal State Budgetary Institution “Centre for Strategic Planning and Management of Biomedical Health Risks” of the Federal Medical Biological Agency, Laboratory for advanced molecular diagnostics of human diseases.	119121, Moscow, Russia, Pogodinskaya str. 10	LQ-23862_S213/2022
123333	csp_omicron.fasta	hCoV-19/Russia/MOW-CSP-LQ-23864_S259/2022	betacoronavirus	Original	2022-01-30	Europe/Russia/Moscow/Moscow	Human	unknown	unknown	unknown	Illumina NextSeq	bwa mapping + consensus		Chief Federal State Budgetary Healthcare Institution “Centre of Hygiene and Epidemiology” of the Federal Medical Biological Agency, Central laboratory of microbiological and clinical diagnostic tests		Federal State Budgetary Institution “Centre for Strategic Planning and Management of Biomedical Health Risks” of the Federal Medical Biological Agency, Laboratory for advanced molecular diagnostics of human diseases.	119121, Moscow, Russia, Pogodinskaya str. 10	LQ-23864_S259/2022
123333	csp_omicron.fasta	hCoV-19/Russia/MOW-CSP-LQ-23865_S260/2022	betacoronavirus	Original	2022-01-30	Europe/Russia/Moscow/Moscow	Human	unknown	unknown	unknown	Illumina NextSeq	bwa mapping + consensus		Chief Federal State Budgetary Healthcare Institution “Centre of Hygiene and Epidemiology” of the Federal Medical Biological Agency, Central laboratory of microbiological and clinical diagnostic tests		Federal State Budgetary Institution “Centre for Strategic Planning and Management of Biomedical Health Risks” of the Federal Medical Biological Agency, Laboratory for advanced molecular diagnostics of human diseases.	119121, Moscow, Russia, Pogodinskaya str. 10	LQ-23865_S260/2022
123333	csp_omicron.fasta	hCoV-19/Russia/MOW-CSP-LQ-23871_S261/2022	betacoronavirus	Original	2022-01-30	Europe/Russia/Moscow/Moscow	Human	unknown	unknown	unknown	Illumina NextSeq	bwa mapping + consensus		Chief Federal State Budgetary Healthcare Institution “Centre of Hygiene and Epidemiology” of the Federal Medical Biological Agency, Central laboratory of microbiological and clinical diagnostic tests		Federal State Budgetary Institution “Centre for Strategic Planning and Management of Biomedical Health Risks” of the Federal Medical Biological Agency, Laboratory for advanced molecular diagnostics of human diseases.	119121, Moscow, Russia, Pogodinskaya str. 10	LQ-23871_S261/2022
123333	csp_omicron.fasta	hCoV-19/Russia/MOW-CSP-LQ-23873_S262/2022	betacoronavirus	Original	2022-01-30	Europe/Russia/Moscow/Moscow	Human	unknown	unknown	unknown	Illumina NextSeq	bwa mapping + consensus		Chief Federal State Budgetary Healthcare Institution “Centre of Hygiene and Epidemiology” of the Federal Medical Biological Agency, Central laboratory of microbiological and clinical diagnostic tests		Federal State Budgetary Institution “Centre for Strategic Planning and Management of Biomedical Health Risks” of the Federal Medical Biological Agency, Laboratory for advanced molecular diagnostics of human diseases.	119121, Moscow, Russia, Pogodinskaya str. 10	LQ-23873_S262/2022
123333	csp_omicron.fasta	hCoV-19/Russia/MOW-CSP-LQ-23899_S214/2022	betacoronavirus	Original	2022-01-30	Europe/Russia/Moscow/Moscow	Human	unknown	unknown	unknown	Illumina NextSeq	bwa mapping + consensus		Chief Federal State Budgetary Healthcare Institution “Centre of Hygiene and Epidemiology” of the Federal Medical Biological Agency, Central laboratory of microbiological and clinical diagnostic tests		Federal State Budgetary Institution “Centre for Strategic Planning and Management of Biomedical Health Risks” of the Federal Medical Biological Agency, Laboratory for advanced molecular diagnostics of human diseases.	119121, Moscow, Russia, Pogodinskaya str. 10	LQ-23899_S214/2022
123333	csp_omicron.fasta	hCoV-19/Russia/MOW-CSP-LQ-23900_S263/2022	betacoronavirus	Original	2022-01-30	Europe/Russia/Moscow/Moscow	Human	unknown	unknown	unknown	Illumina NextSeq	bwa mapping + consensus		Chief Federal State Budgetary Healthcare Institution “Centre of Hygiene and Epidemiology” of the Federal Medical Biological Agency, Central laboratory of microbiological and clinical diagnostic tests		Federal State Budgetary Institution “Centre for Strategic Planning and Management of Biomedical Health Risks” of the Federal Medical Biological Agency, Laboratory for advanced molecular diagnostics of human diseases.	119121, Moscow, Russia, Pogodinskaya str. 10	LQ-23900_S263/2022
123333	csp_omicron.fasta	hCoV-19/Russia/MOW-CSP-LQ-23902_S264/2022	betacoronavirus	Original	2022-01-30	Europe/Russia/Moscow/Moscow	Human	unknown	unknown	unknown	Illumina NextSeq	bwa mapping + consensus		Chief Federal State Budgetary Healthcare Institution “Centre of Hygiene and Epidemiology” of the Federal Medical Biological Agency, Central laboratory of microbiological and clinical diagnostic tests		Federal State Budgetary Institution “Centre for Strategic Planning and Management of Biomedical Health Risks” of the Federal Medical Biological Agency, Laboratory for advanced molecular diagnostics of human diseases.	119121, Moscow, Russia, Pogodinskaya str. 10	LQ-23902_S264/2022
123333	csp_omicron.fasta	hCoV-19/Russia/MOW-CSP-LQ-23909_S265/2022	betacoronavirus	Original	2022-01-30	Europe/Russia/Moscow/Moscow	Human	unknown	unknown	unknown	Illumina NextSeq	bwa mapping + consensus		Chief Federal State Budgetary Healthcare Institution “Centre of Hygiene and Epidemiology” of the Federal Medical Biological Agency, Central laboratory of microbiological and clinical diagnostic tests		Federal State Budgetary Institution “Centre for Strategic Planning and Management of Biomedical Health Risks” of the Federal Medical Biological Agency, Laboratory for advanced molecular diagnostics of human diseases.	119121, Moscow, Russia, Pogodinskaya str. 10	LQ-23909_S265/2022
123333	csp_omicron.fasta	hCoV-19/Russia/MOW-CSP-LQ-23930_S266/2022	betacoronavirus	Original	2022-01-30	Europe/Russia/Moscow/Moscow	Human	unknown	unknown	unknown	Illumina NextSeq	bwa mapping + consensus		Chief Federal State Budgetary Healthcare Institution “Centre of Hygiene and Epidemiology” of the Federal Medical Biological Agency, Central laboratory of microbiological and clinical diagnostic tests		Federal State Budgetary Institution “Centre for Strategic Planning and Management of Biomedical Health Risks” of the Federal Medical Biological Agency, Laboratory for advanced molecular diagnostics of human diseases.	119121, Moscow, Russia, Pogodinskaya str. 10	LQ-23930_S266/2022
123333	csp_omicron.fasta	hCoV-19/Russia/MOW-CSP-LQ-23933_S267/2022	betacoronavirus	Original	2022-01-30	Europe/Russia/Moscow/Moscow	Human	unknown	unknown	unknown	Illumina NextSeq	bwa mapping + consensus		Chief Federal State Budgetary Healthcare Institution “Centre of Hygiene and Epidemiology” of the Federal Medical Biological Agency, Central laboratory of microbiological and clinical diagnostic tests		Federal State Budgetary Institution “Centre for Strategic Planning and Management of Biomedical Health Risks” of the Federal Medical Biological Agency, Laboratory for advanced molecular diagnostics of human diseases.	119121, Moscow, Russia, Pogodinskaya str. 10	LQ-23933_S267/2022
123333	csp_omicron.fasta	hCoV-19/Russia/MOW-CSP-LQ-23937_S268/2022	betacoronavirus	Original	2022-01-30	Europe/Russia/Moscow/Moscow	Human	unknown	unknown	unknown	Illumina NextSeq	bwa mapping + consensus		Chief Federal State Budgetary Healthcare Institution “Centre of Hygiene and Epidemiology” of the Federal Medical Biological Agency, Central laboratory of microbiological and clinical diagnostic tests		Federal State Budgetary Institution “Centre for Strategic Planning and Management of Biomedical Health Risks” of the Federal Medical Biological Agency, Laboratory for advanced molecular diagnostics of human diseases.	119121, Moscow, Russia, Pogodinskaya str. 10	LQ-23937_S268/2022
123333	csp_omicron.fasta	hCoV-19/Russia/MOW-CSP-LQ-23940_S269/2022	betacoronavirus	Original	2022-01-30	Europe/Russia/Moscow/Moscow	Human	unknown	unknown	unknown	Illumina NextSeq	bwa mapping + consensus		Chief Federal State Budgetary Healthcare Institution “Centre of Hygiene and Epidemiology” of the Federal Medical Biological Agency, Central laboratory of microbiological and clinical diagnostic tests		Federal State Budgetary Institution “Centre for Strategic Planning and Management of Biomedical Health Risks” of the Federal Medical Biological Agency, Laboratory for advanced molecular diagnostics of human diseases.	119121, Moscow, Russia, Pogodinskaya str. 10	LQ-23940_S269/2022
123333	csp_omicron.fasta	hCoV-19/Russia/MOW-CSP-LQ-23942_S270/2022	betacoronavirus	Original	2022-01-30	Europe/Russia/Moscow/Moscow	Human	unknown	unknown	unknown	Illumina NextSeq	bwa mapping + consensus		Chief Federal State Budgetary Healthcare Institution “Centre of Hygiene and Epidemiology” of the Federal Medical Biological Agency, Central laboratory of microbiological and clinical diagnostic tests		Federal State Budgetary Institution “Centre for Strategic Planning and Management of Biomedical Health Risks” of the Federal Medical Biological Agency, Laboratory for advanced molecular diagnostics of human diseases.	119121, Moscow, Russia, Pogodinskaya str. 10	LQ-23942_S270/2022
123333	csp_omicron.fasta	hCoV-19/Russia/MOW-CSP-LQ-23944_S271/2022	betacoronavirus	Original	2022-01-30	Europe/Russia/Moscow/Moscow	Human	unknown	unknown	unknown	Illumina NextSeq	bwa mapping + consensus		Chief Federal State Budgetary Healthcare Institution “Centre of Hygiene and Epidemiology” of the Federal Medical Biological Agency, Central laboratory of microbiological and clinical diagnostic tests		Federal State Budgetary Institution “Centre for Strategic Planning and Management of Biomedical Health Risks” of the Federal Medical Biological Agency, Laboratory for advanced molecular diagnostics of human diseases.	119121, Moscow, Russia, Pogodinskaya str. 10	LQ-23944_S271/2022
123333	csp_omicron.fasta	hCoV-19/Russia/MOW-CSP-LQ-23945_S272/2022	betacoronavirus	Original	2022-01-30	Europe/Russia/Moscow/Moscow	Human	unknown	unknown	unknown	Illumina NextSeq	bwa mapping + consensus		Chief Federal State Budgetary Healthcare Institution “Centre of Hygiene and Epidemiology” of the Federal Medical Biological Agency, Central laboratory of microbiological and clinical diagnostic tests		Federal State Budgetary Institution “Centre for Strategic Planning and Management of Biomedical Health Risks” of the Federal Medical Biological Agency, Laboratory for advanced molecular diagnostics of human diseases.	119121, Moscow, Russia, Pogodinskaya str. 10	LQ-23945_S272/2022
123333	csp_omicron.fasta	hCoV-19/Russia/MOW-CSP-LQ-23947_S273/2022	betacoronavirus	Original	2022-01-30	Europe/Russia/Moscow/Moscow	Human	unknown	unknown	unknown	Illumina NextSeq	bwa mapping + consensus		Chief Federal State Budgetary Healthcare Institution “Centre of Hygiene and Epidemiology” of the Federal Medical Biological Agency, Central laboratory of microbiological and clinical diagnostic tests		Federal State Budgetary Institution “Centre for Strategic Planning and Management of Biomedical Health Risks” of the Federal Medical Biological Agency, Laboratory for advanced molecular diagnostics of human diseases.	119121, Moscow, Russia, Pogodinskaya str. 10	LQ-23947_S273/2022
123333	csp_omicron.fasta	hCoV-19/Russia/MOW-CSP-LQ-23949_S274/2022	betacoronavirus	Original	2022-01-30	Europe/Russia/Moscow/Moscow	Human	unknown	unknown	unknown	Illumina NextSeq	bwa mapping + consensus		Chief Federal State Budgetary Healthcare Institution “Centre of Hygiene and Epidemiology” of the Federal Medical Biological Agency, Central laboratory of microbiological and clinical diagnostic tests		Federal State Budgetary Institution “Centre for Strategic Planning and Management of Biomedical Health Risks” of the Federal Medical Biological Agency, Laboratory for advanced molecular diagnostics of human diseases.	119121, Moscow, Russia, Pogodinskaya str. 10	LQ-23949_S274/2022
123333	csp_omicron.fasta	hCoV-19/Russia/MOW-CSP-LQ-23950_S275/2022	betacoronavirus	Original	2022-01-30	Europe/Russia/Moscow/Moscow	Human	unknown	unknown	unknown	Illumina NextSeq	bwa mapping + consensus		Chief Federal State Budgetary Healthcare Institution “Centre of Hygiene and Epidemiology” of the Federal Medical Biological Agency, Central laboratory of microbiological and clinical diagnostic tests		Federal State Budgetary Institution “Centre for Strategic Planning and Management of Biomedical Health Risks” of the Federal Medical Biological Agency, Laboratory for advanced molecular diagnostics of human diseases.	119121, Moscow, Russia, Pogodinskaya str. 10	LQ-23950_S275/2022
123333	csp_omicron.fasta	hCoV-19/Russia/MOW-CSP-RZD-266_S183/2022	betacoronavirus	Original	2022-01-18	Europe/Russia/Moscow/Moscow	Human	unknown	unknown	unknown	Illumina NextSeq	bwa mapping + consensus		Chief Federal State Budgetary Healthcare Institution “Centre of Hygiene and Epidemiology” of the Federal Medical Biological Agency, Central laboratory of microbiological and clinical diagnostic tests		Federal State Budgetary Institution “Centre for Strategic Planning and Management of Biomedical Health Risks” of the Federal Medical Biological Agency, Laboratory for advanced molecular diagnostics of human diseases.	119121, Moscow, Russia, Pogodinskaya str. 10	RZD-266_S183/2022
123333	csp_omicron.fasta	hCoV-19/Russia/MOW-CSP-RZD-295_S215/2022	betacoronavirus	Original	2022-01-19	Europe/Russia/Moscow/Moscow	Human	unknown	unknown	unknown	Illumina NextSeq	bwa mapping + consensus		Chief Federal State Budgetary Healthcare Institution “Centre of Hygiene and Epidemiology” of the Federal Medical Biological Agency, Central laboratory of microbiological and clinical diagnostic tests		Federal State Budgetary Institution “Centre for Strategic Planning and Management of Biomedical Health Risks” of the Federal Medical Biological Agency, Laboratory for advanced molecular diagnostics of human diseases.	119121, Moscow, Russia, Pogodinskaya str. 10	RZD-295_S215/2022
123333	csp_omicron.fasta	hCoV-19/Russia/MOW-CSP-LQ-20972_S1/2022	betacoronavirus	Original	2022-01-04	Europe/Russia/Moscow/Moscow	Human	unknown	unknown	unknown	Illumina NextSeq	bwa mapping + consensus		Chief Federal State Budgetary Healthcare Institution “Centre of Hygiene and Epidemiology” of the Federal Medical Biological Agency, Central laboratory of microbiological and clinical diagnostic tests		Federal State Budgetary Institution “Centre for Strategic Planning and Management of Biomedical Health Risks” of the Federal Medical Biological Agency, Laboratory for advanced molecular diagnostics of human diseases.	119121, Moscow, Russia, Pogodinskaya str. 10	LQ-20972_S1/2022
123333	csp_omicron.fasta	hCoV-19/Russia/MOW-CSP-LQ-20973_S76/2022	betacoronavirus	Original	2022-01-04	Europe/Russia/Moscow/Moscow	Human	unknown	unknown	unknown	Illumina NextSeq	bwa mapping + consensus		Chief Federal State Budgetary Healthcare Institution “Centre of Hygiene and Epidemiology” of the Federal Medical Biological Agency, Central laboratory of microbiological and clinical diagnostic tests		Federal State Budgetary Institution “Centre for Strategic Planning and Management of Biomedical Health Risks” of the Federal Medical Biological Agency, Laboratory for advanced molecular diagnostics of human diseases.	119121, Moscow, Russia, Pogodinskaya str. 10	LQ-20973_S76/2022
123333	csp_omicron.fasta	hCoV-19/Russia/MOW-CSP-LQ-20975_S77/2022	betacoronavirus	Original	2022-01-04	Europe/Russia/Moscow/Moscow	Human	unknown	unknown	unknown	Illumina NextSeq	bwa mapping + consensus		Chief Federal State Budgetary Healthcare Institution “Centre of Hygiene and Epidemiology” of the Federal Medical Biological Agency, Central laboratory of microbiological and clinical diagnostic tests		Federal State Budgetary Institution “Centre for Strategic Planning and Management of Biomedical Health Risks” of the Federal Medical Biological Agency, Laboratory for advanced molecular diagnostics of human diseases.	119121, Moscow, Russia, Pogodinskaya str. 10	LQ-20975_S77/2022
123333	csp_omicron.fasta	hCoV-19/Russia/MOW-CSP-LQ-20976_S2/2022	betacoronavirus	Original	2022-01-04	Europe/Russia/Moscow/Moscow	Human	unknown	unknown	unknown	Illumina NextSeq	bwa mapping + consensus		Chief Federal State Budgetary Healthcare Institution “Centre of Hygiene and Epidemiology” of the Federal Medical Biological Agency, Central laboratory of microbiological and clinical diagnostic tests		Federal State Budgetary Institution “Centre for Strategic Planning and Management of Biomedical Health Risks” of the Federal Medical Biological Agency, Laboratory for advanced molecular diagnostics of human diseases.	119121, Moscow, Russia, Pogodinskaya str. 10	LQ-20976_S2/2022
123333	csp_omicron.fasta	hCoV-19/Russia/MOW-CSP-LQ-20977_S3/2022	betacoronavirus	Original	2022-01-04	Europe/Russia/Moscow/Moscow	Human	unknown	unknown	unknown	Illumina NextSeq	bwa mapping + consensus		Chief Federal State Budgetary Healthcare Institution “Centre of Hygiene and Epidemiology” of the Federal Medical Biological Agency, Central laboratory of microbiological and clinical diagnostic tests		Federal State Budgetary Institution “Centre for Strategic Planning and Management of Biomedical Health Risks” of the Federal Medical Biological Agency, Laboratory for advanced molecular diagnostics of human diseases.	119121, Moscow, Russia, Pogodinskaya str. 10	LQ-20977_S3/2022
123333	csp_omicron.fasta	hCoV-19/Russia/MOW-CSP-LQ-20981_S4/2022	betacoronavirus	Original	2022-01-04	Europe/Russia/Moscow/Moscow	Human	unknown	unknown	unknown	Illumina NextSeq	bwa mapping + consensus		Chief Federal State Budgetary Healthcare Institution “Centre of Hygiene and Epidemiology” of the Federal Medical Biological Agency, Central laboratory of microbiological and clinical diagnostic tests		Federal State Budgetary Institution “Centre for Strategic Planning and Management of Biomedical Health Risks” of the Federal Medical Biological Agency, Laboratory for advanced molecular diagnostics of human diseases.	119121, Moscow, Russia, Pogodinskaya str. 10	LQ-20981_S4/2022
123333	csp_omicron.fasta	hCoV-19/Russia/MOW-CSP-LQ-20984_S5/2022	betacoronavirus	Original	2022-01-04	Europe/Russia/Moscow/Moscow	Human	unknown	unknown	unknown	Illumina NextSeq	bwa mapping + consensus		Chief Federal State Budgetary Healthcare Institution “Centre of Hygiene and Epidemiology” of the Federal Medical Biological Agency, Central laboratory of microbiological and clinical diagnostic tests		Federal State Budgetary Institution “Centre for Strategic Planning and Management of Biomedical Health Risks” of the Federal Medical Biological Agency, Laboratory for advanced molecular diagnostics of human diseases.	119121, Moscow, Russia, Pogodinskaya str. 10	LQ-20984_S5/2022
123333	csp_omicron.fasta	hCoV-19/Russia/MOW-CSP-LQ-20985_S6/2022	betacoronavirus	Original	2022-01-04	Europe/Russia/Moscow/Moscow	Human	unknown	unknown	unknown	Illumina NextSeq	bwa mapping + consensus		Chief Federal State Budgetary Healthcare Institution “Centre of Hygiene and Epidemiology” of the Federal Medical Biological Agency, Central laboratory of microbiological and clinical diagnostic tests		Federal State Budgetary Institution “Centre for Strategic Planning and Management of Biomedical Health Risks” of the Federal Medical Biological Agency, Laboratory for advanced molecular diagnostics of human diseases.	119121, Moscow, Russia, Pogodinskaya str. 10	LQ-20985_S6/2022
123333	csp_omicron.fasta	hCoV-19/Russia/MOW-CSP-LQ-20986_S7/2022	betacoronavirus	Original	2022-01-04	Europe/Russia/Moscow/Moscow	Human	unknown	unknown	unknown	Illumina NextSeq	bwa mapping + consensus		Chief Federal State Budgetary Healthcare Institution “Centre of Hygiene and Epidemiology” of the Federal Medical Biological Agency, Central laboratory of microbiological and clinical diagnostic tests		Federal State Budgetary Institution “Centre for Strategic Planning and Management of Biomedical Health Risks” of the Federal Medical Biological Agency, Laboratory for advanced molecular diagnostics of human diseases.	119121, Moscow, Russia, Pogodinskaya str. 10	LQ-20986_S7/2022
123333	csp_omicron.fasta	hCoV-19/Russia/MOW-CSP-LQ-20991_S78/2022	betacoronavirus	Original	2022-01-04	Europe/Russia/Moscow/Moscow	Human	unknown	unknown	unknown	Illumina NextSeq	bwa mapping + consensus		Chief Federal State Budgetary Healthcare Institution “Centre of Hygiene and Epidemiology” of the Federal Medical Biological Agency, Central laboratory of microbiological and clinical diagnostic tests		Federal State Budgetary Institution “Centre for Strategic Planning and Management of Biomedical Health Risks” of the Federal Medical Biological Agency, Laboratory for advanced molecular diagnostics of human diseases.	119121, Moscow, Russia, Pogodinskaya str. 10	LQ-20991_S78/2022
123333	csp_omicron.fasta	hCoV-19/Russia/MOW-CSP-LQ-20992_S9/2022	betacoronavirus	Original	2022-01-04	Europe/Russia/Moscow/Moscow	Human	unknown	unknown	unknown	Illumina NextSeq	bwa mapping + consensus		Chief Federal State Budgetary Healthcare Institution “Centre of Hygiene and Epidemiology” of the Federal Medical Biological Agency, Central laboratory of microbiological and clinical diagnostic tests		Federal State Budgetary Institution “Centre for Strategic Planning and Management of Biomedical Health Risks” of the Federal Medical Biological Agency, Laboratory for advanced molecular diagnostics of human diseases.	119121, Moscow, Russia, Pogodinskaya str. 10	LQ-20992_S9/2022
123333	csp_omicron.fasta	hCoV-19/Russia/MOW-CSP-LQ-20993_S10/2022	betacoronavirus	Original	2022-01-04	Europe/Russia/Moscow/Moscow	Human	unknown	unknown	unknown	Illumina NextSeq	bwa mapping + consensus		Chief Federal State Budgetary Healthcare Institution “Centre of Hygiene and Epidemiology” of the Federal Medical Biological Agency, Central laboratory of microbiological and clinical diagnostic tests		Federal State Budgetary Institution “Centre for Strategic Planning and Management of Biomedical Health Risks” of the Federal Medical Biological Agency, Laboratory for advanced molecular diagnostics of human diseases.	119121, Moscow, Russia, Pogodinskaya str. 10	LQ-20993_S10/2022
123333	csp_omicron.fasta	hCoV-19/Russia/MOW-CSP-LQ-21001_S11/2022	betacoronavirus	Original	2022-01-08	Europe/Russia/Moscow/Moscow	Human	unknown	unknown	unknown	Illumina NextSeq	bwa mapping + consensus		Chief Federal State Budgetary Healthcare Institution “Centre of Hygiene and Epidemiology” of the Federal Medical Biological Agency, Central laboratory of microbiological and clinical diagnostic tests		Federal State Budgetary Institution “Centre for Strategic Planning and Management of Biomedical Health Risks” of the Federal Medical Biological Agency, Laboratory for advanced molecular diagnostics of human diseases.	119121, Moscow, Russia, Pogodinskaya str. 10	LQ-21001_S11/2022
123333	csp_omicron.fasta	hCoV-19/Russia/MOW-CSP-LQ-21002_S12/2022	betacoronavirus	Original	2022-01-08	Europe/Russia/Moscow/Moscow	Human	unknown	unknown	unknown	Illumina NextSeq	bwa mapping + consensus		Chief Federal State Budgetary Healthcare Institution “Centre of Hygiene and Epidemiology” of the Federal Medical Biological Agency, Central laboratory of microbiological and clinical diagnostic tests		Federal State Budgetary Institution “Centre for Strategic Planning and Management of Biomedical Health Risks” of the Federal Medical Biological Agency, Laboratory for advanced molecular diagnostics of human diseases.	119121, Moscow, Russia, Pogodinskaya str. 10	LQ-21002_S12/2022
123333	csp_omicron.fasta	hCoV-19/Russia/MOW-CSP-LQ-21005_S13/2022	betacoronavirus	Original	2022-01-08	Europe/Russia/Moscow/Moscow	Human	unknown	unknown	unknown	Illumina NextSeq	bwa mapping + consensus		Chief Federal State Budgetary Healthcare Institution “Centre of Hygiene and Epidemiology” of the Federal Medical Biological Agency, Central laboratory of microbiological and clinical diagnostic tests		Federal State Budgetary Institution “Centre for Strategic Planning and Management of Biomedical Health Risks” of the Federal Medical Biological Agency, Laboratory for advanced molecular diagnostics of human diseases.	119121, Moscow, Russia, Pogodinskaya str. 10	LQ-21005_S13/2022
123333	csp_omicron.fasta	hCoV-19/Russia/MOW-CSP-LQ-21009_S14/2022	betacoronavirus	Original	2022-01-08	Europe/Russia/Moscow/Moscow	Human	unknown	unknown	unknown	Illumina NextSeq	bwa mapping + consensus		Chief Federal State Budgetary Healthcare Institution “Centre of Hygiene and Epidemiology” of the Federal Medical Biological Agency, Central laboratory of microbiological and clinical diagnostic tests		Federal State Budgetary Institution “Centre for Strategic Planning and Management of Biomedical Health Risks” of the Federal Medical Biological Agency, Laboratory for advanced molecular diagnostics of human diseases.	119121, Moscow, Russia, Pogodinskaya str. 10	LQ-21009_S14/2022
123333	csp_omicron.fasta	hCoV-19/Russia/MOW-CSP-LQ-21011_S15/2022	betacoronavirus	Original	2022-01-08	Europe/Russia/Moscow/Moscow	Human	unknown	unknown	unknown	Illumina NextSeq	bwa mapping + consensus		Chief Federal State Budgetary Healthcare Institution “Centre of Hygiene and Epidemiology” of the Federal Medical Biological Agency, Central laboratory of microbiological and clinical diagnostic tests		Federal State Budgetary Institution “Centre for Strategic Planning and Management of Biomedical Health Risks” of the Federal Medical Biological Agency, Laboratory for advanced molecular diagnostics of human diseases.	119121, Moscow, Russia, Pogodinskaya str. 10	LQ-21011_S15/2022
123333	csp_omicron.fasta	hCoV-19/Russia/MOW-CSP-LQ-21012_S16/2022	betacoronavirus	Original	2022-01-08	Europe/Russia/Moscow/Moscow	Human	unknown	unknown	unknown	Illumina NextSeq	bwa mapping + consensus		Chief Federal State Budgetary Healthcare Institution “Centre of Hygiene and Epidemiology” of the Federal Medical Biological Agency, Central laboratory of microbiological and clinical diagnostic tests		Federal State Budgetary Institution “Centre for Strategic Planning and Management of Biomedical Health Risks” of the Federal Medical Biological Agency, Laboratory for advanced molecular diagnostics of human diseases.	119121, Moscow, Russia, Pogodinskaya str. 10	LQ-21012_S16/2022
123333	csp_omicron.fasta	hCoV-19/Russia/MOW-CSP-LQ-21013_S17/2022	betacoronavirus	Original	2022-01-08	Europe/Russia/Moscow/Moscow	Human	unknown	unknown	unknown	Illumina NextSeq	bwa mapping + consensus		Chief Federal State Budgetary Healthcare Institution “Centre of Hygiene and Epidemiology” of the Federal Medical Biological Agency, Central laboratory of microbiological and clinical diagnostic tests		Federal State Budgetary Institution “Centre for Strategic Planning and Management of Biomedical Health Risks” of the Federal Medical Biological Agency, Laboratory for advanced molecular diagnostics of human diseases.	119121, Moscow, Russia, Pogodinskaya str. 10	LQ-21013_S17/2022
123333	csp_omicron.fasta	hCoV-19/Russia/MOW-CSP-LQ-21014_S18/2022	betacoronavirus	Original	2022-01-08	Europe/Russia/Moscow/Moscow	Human	unknown	unknown	unknown	Illumina NextSeq	bwa mapping + consensus		Chief Federal State Budgetary Healthcare Institution “Centre of Hygiene and Epidemiology” of the Federal Medical Biological Agency, Central laboratory of microbiological and clinical diagnostic tests		Federal State Budgetary Institution “Centre for Strategic Planning and Management of Biomedical Health Risks” of the Federal Medical Biological Agency, Laboratory for advanced molecular diagnostics of human diseases.	119121, Moscow, Russia, Pogodinskaya str. 10	LQ-21014_S18/2022
123333	csp_omicron.fasta	hCoV-19/Russia/MOW-CSP-LQ-21016_S19/2022	betacoronavirus	Original	2022-01-08	Europe/Russia/Moscow/Moscow	Human	unknown	unknown	unknown	Illumina NextSeq	bwa mapping + consensus		Chief Federal State Budgetary Healthcare Institution “Centre of Hygiene and Epidemiology” of the Federal Medical Biological Agency, Central laboratory of microbiological and clinical diagnostic tests		Federal State Budgetary Institution “Centre for Strategic Planning and Management of Biomedical Health Risks” of the Federal Medical Biological Agency, Laboratory for advanced molecular diagnostics of human diseases.	119121, Moscow, Russia, Pogodinskaya str. 10	LQ-21016_S19/2022
123333	csp_omicron.fasta	hCoV-19/Russia/MOW-CSP-LQ-21021_S20/2022	betacoronavirus	Original	2022-01-08	Europe/Russia/Moscow/Moscow	Human	unknown	unknown	unknown	Illumina NextSeq	bwa mapping + consensus		Chief Federal State Budgetary Healthcare Institution “Centre of Hygiene and Epidemiology” of the Federal Medical Biological Agency, Central laboratory of microbiological and clinical diagnostic tests		Federal State Budgetary Institution “Centre for Strategic Planning and Management of Biomedical Health Risks” of the Federal Medical Biological Agency, Laboratory for advanced molecular diagnostics of human diseases.	119121, Moscow, Russia, Pogodinskaya str. 10	LQ-21021_S20/2022
123333	csp_omicron.fasta	hCoV-19/Russia/MOW-CSP-LQ-21024_S21/2022	betacoronavirus	Original	2022-01-08	Europe/Russia/Moscow/Moscow	Human	unknown	unknown	unknown	Illumina NextSeq	bwa mapping + consensus		Chief Federal State Budgetary Healthcare Institution “Centre of Hygiene and Epidemiology” of the Federal Medical Biological Agency, Central laboratory of microbiological and clinical diagnostic tests		Federal State Budgetary Institution “Centre for Strategic Planning and Management of Biomedical Health Risks” of the Federal Medical Biological Agency, Laboratory for advanced molecular diagnostics of human diseases.	119121, Moscow, Russia, Pogodinskaya str. 10	LQ-21024_S21/2022
123333	csp_omicron.fasta	hCoV-19/Russia/MOW-CSP-LQ-21027_S22/2022	betacoronavirus	Original	2022-01-08	Europe/Russia/Moscow/Moscow	Human	unknown	unknown	unknown	Illumina NextSeq	bwa mapping + consensus		Chief Federal State Budgetary Healthcare Institution “Centre of Hygiene and Epidemiology” of the Federal Medical Biological Agency, Central laboratory of microbiological and clinical diagnostic tests		Federal State Budgetary Institution “Centre for Strategic Planning and Management of Biomedical Health Risks” of the Federal Medical Biological Agency, Laboratory for advanced molecular diagnostics of human diseases.	119121, Moscow, Russia, Pogodinskaya str. 10	LQ-21027_S22/2022
123333	csp_omicron.fasta	hCoV-19/Russia/MOW-CSP-LQ-21031_S23/2022	betacoronavirus	Original	2022-01-08	Europe/Russia/Moscow/Moscow	Human	unknown	unknown	unknown	Illumina NextSeq	bwa mapping + consensus		Chief Federal State Budgetary Healthcare Institution “Centre of Hygiene and Epidemiology” of the Federal Medical Biological Agency, Central laboratory of microbiological and clinical diagnostic tests		Federal State Budgetary Institution “Centre for Strategic Planning and Management of Biomedical Health Risks” of the Federal Medical Biological Agency, Laboratory for advanced molecular diagnostics of human diseases.	119121, Moscow, Russia, Pogodinskaya str. 10	LQ-21031_S23/2022
123333	csp_omicron.fasta	hCoV-19/Russia/MOW-CSP-LQ-21032_S24/2022	betacoronavirus	Original	2022-01-08	Europe/Russia/Moscow/Moscow	Human	unknown	unknown	unknown	Illumina NextSeq	bwa mapping + consensus		Chief Federal State Budgetary Healthcare Institution “Centre of Hygiene and Epidemiology” of the Federal Medical Biological Agency, Central laboratory of microbiological and clinical diagnostic tests		Federal State Budgetary Institution “Centre for Strategic Planning and Management of Biomedical Health Risks” of the Federal Medical Biological Agency, Laboratory for advanced molecular diagnostics of human diseases.	119121, Moscow, Russia, Pogodinskaya str. 10	LQ-21032_S24/2022
123333	csp_omicron.fasta	hCoV-19/Russia/MOW-CSP-LQ-21033_S79/2022	betacoronavirus	Original	2022-01-08	Europe/Russia/Moscow/Moscow	Human	unknown	unknown	unknown	Illumina NextSeq	bwa mapping + consensus		Chief Federal State Budgetary Healthcare Institution “Centre of Hygiene and Epidemiology” of the Federal Medical Biological Agency, Central laboratory of microbiological and clinical diagnostic tests		Federal State Budgetary Institution “Centre for Strategic Planning and Management of Biomedical Health Risks” of the Federal Medical Biological Agency, Laboratory for advanced molecular diagnostics of human diseases.	119121, Moscow, Russia, Pogodinskaya str. 10	LQ-21033_S79/2022
123333	csp_omicron.fasta	hCoV-19/Russia/MOW-CSP-LQ-21034_S80/2022	betacoronavirus	Original	2022-01-08	Europe/Russia/Moscow/Moscow	Human	unknown	unknown	unknown	Illumina NextSeq	bwa mapping + consensus		Chief Federal State Budgetary Healthcare Institution “Centre of Hygiene and Epidemiology” of the Federal Medical Biological Agency, Central laboratory of microbiological and clinical diagnostic tests		Federal State Budgetary Institution “Centre for Strategic Planning and Management of Biomedical Health Risks” of the Federal Medical Biological Agency, Laboratory for advanced molecular diagnostics of human diseases.	119121, Moscow, Russia, Pogodinskaya str. 10	LQ-21034_S80/2022
123333	csp_omicron.fasta	hCoV-19/Russia/MOW-CSP-LQ-21036_S25/2022	betacoronavirus	Original	2022-01-08	Europe/Russia/Moscow/Moscow	Human	unknown	unknown	unknown	Illumina NextSeq	bwa mapping + consensus		Chief Federal State Budgetary Healthcare Institution “Centre of Hygiene and Epidemiology” of the Federal Medical Biological Agency, Central laboratory of microbiological and clinical diagnostic tests		Federal State Budgetary Institution “Centre for Strategic Planning and Management of Biomedical Health Risks” of the Federal Medical Biological Agency, Laboratory for advanced molecular diagnostics of human diseases.	119121, Moscow, Russia, Pogodinskaya str. 10	LQ-21036_S25/2022
123333	csp_omicron.fasta	hCoV-19/Russia/MOW-CSP-LQ-21037_S26/2022	betacoronavirus	Original	2022-01-08	Europe/Russia/Moscow/Moscow	Human	unknown	unknown	unknown	Illumina NextSeq	bwa mapping + consensus		Chief Federal State Budgetary Healthcare Institution “Centre of Hygiene and Epidemiology” of the Federal Medical Biological Agency, Central laboratory of microbiological and clinical diagnostic tests		Federal State Budgetary Institution “Centre for Strategic Planning and Management of Biomedical Health Risks” of the Federal Medical Biological Agency, Laboratory for advanced molecular diagnostics of human diseases.	119121, Moscow, Russia, Pogodinskaya str. 10	LQ-21037_S26/2022
123333	csp_omicron.fasta	hCoV-19/Russia/MOW-CSP-LQ-21040_S27/2022	betacoronavirus	Original	2022-01-08	Europe/Russia/Moscow/Moscow	Human	unknown	unknown	unknown	Illumina NextSeq	bwa mapping + consensus		Chief Federal State Budgetary Healthcare Institution “Centre of Hygiene and Epidemiology” of the Federal Medical Biological Agency, Central laboratory of microbiological and clinical diagnostic tests		Federal State Budgetary Institution “Centre for Strategic Planning and Management of Biomedical Health Risks” of the Federal Medical Biological Agency, Laboratory for advanced molecular diagnostics of human diseases.	119121, Moscow, Russia, Pogodinskaya str. 10	LQ-21040_S27/2022
123333	csp_omicron.fasta	hCoV-19/Russia/MOW-CSP-LQ-21045_S28/2022	betacoronavirus	Original	2022-01-09	Europe/Russia/Moscow/Moscow	Human	unknown	unknown	unknown	Illumina NextSeq	bwa mapping + consensus		Chief Federal State Budgetary Healthcare Institution “Centre of Hygiene and Epidemiology” of the Federal Medical Biological Agency, Central laboratory of microbiological and clinical diagnostic tests		Federal State Budgetary Institution “Centre for Strategic Planning and Management of Biomedical Health Risks” of the Federal Medical Biological Agency, Laboratory for advanced molecular diagnostics of human diseases.	119121, Moscow, Russia, Pogodinskaya str. 10	LQ-21045_S28/2022
123333	csp_omicron.fasta	hCoV-19/Russia/MOW-CSP-LQ-21047_S81/2022	betacoronavirus	Original	2022-01-09	Europe/Russia/Moscow/Moscow	Human	unknown	unknown	unknown	Illumina NextSeq	bwa mapping + consensus		Chief Federal State Budgetary Healthcare Institution “Centre of Hygiene and Epidemiology” of the Federal Medical Biological Agency, Central laboratory of microbiological and clinical diagnostic tests		Federal State Budgetary Institution “Centre for Strategic Planning and Management of Biomedical Health Risks” of the Federal Medical Biological Agency, Laboratory for advanced molecular diagnostics of human diseases.	119121, Moscow, Russia, Pogodinskaya str. 10	LQ-21047_S81/2022
123333	csp_omicron.fasta	hCoV-19/Russia/MOW-CSP-LQ-21053_S29/2022	betacoronavirus	Original	2022-01-09	Europe/Russia/Moscow/Moscow	Human	unknown	unknown	unknown	Illumina NextSeq	bwa mapping + consensus		Chief Federal State Budgetary Healthcare Institution “Centre of Hygiene and Epidemiology” of the Federal Medical Biological Agency, Central laboratory of microbiological and clinical diagnostic tests		Federal State Budgetary Institution “Centre for Strategic Planning and Management of Biomedical Health Risks” of the Federal Medical Biological Agency, Laboratory for advanced molecular diagnostics of human diseases.	119121, Moscow, Russia, Pogodinskaya str. 10	LQ-21053_S29/2022
123333	csp_omicron.fasta	hCoV-19/Russia/MOW-CSP-LQ-21056_S30/2022	betacoronavirus	Original	2022-01-09	Europe/Russia/Moscow/Moscow	Human	unknown	unknown	unknown	Illumina NextSeq	bwa mapping + consensus		Chief Federal State Budgetary Healthcare Institution “Centre of Hygiene and Epidemiology” of the Federal Medical Biological Agency, Central laboratory of microbiological and clinical diagnostic tests		Federal State Budgetary Institution “Centre for Strategic Planning and Management of Biomedical Health Risks” of the Federal Medical Biological Agency, Laboratory for advanced molecular diagnostics of human diseases.	119121, Moscow, Russia, Pogodinskaya str. 10	LQ-21056_S30/2022
123333	csp_omicron.fasta	hCoV-19/Russia/MOW-CSP-LQ-21058_S31/2022	betacoronavirus	Original	2022-01-09	Europe/Russia/Moscow/Moscow	Human	unknown	unknown	unknown	Illumina NextSeq	bwa mapping + consensus		Chief Federal State Budgetary Healthcare Institution “Centre of Hygiene and Epidemiology” of the Federal Medical Biological Agency, Central laboratory of microbiological and clinical diagnostic tests		Federal State Budgetary Institution “Centre for Strategic Planning and Management of Biomedical Health Risks” of the Federal Medical Biological Agency, Laboratory for advanced molecular diagnostics of human diseases.	119121, Moscow, Russia, Pogodinskaya str. 10	LQ-21058_S31/2022
123333	csp_omicron.fasta	hCoV-19/Russia/MOW-CSP-LQ-21063_S32/2022	betacoronavirus	Original	2022-01-09	Europe/Russia/Moscow/Moscow	Human	unknown	unknown	unknown	Illumina NextSeq	bwa mapping + consensus		Chief Federal State Budgetary Healthcare Institution “Centre of Hygiene and Epidemiology” of the Federal Medical Biological Agency, Central laboratory of microbiological and clinical diagnostic tests		Federal State Budgetary Institution “Centre for Strategic Planning and Management of Biomedical Health Risks” of the Federal Medical Biological Agency, Laboratory for advanced molecular diagnostics of human diseases.	119121, Moscow, Russia, Pogodinskaya str. 10	LQ-21063_S32/2022
123333	csp_omicron.fasta	hCoV-19/Russia/MOW-CSP-LQ-21075_S33/2022	betacoronavirus	Original	2022-01-09	Europe/Russia/Moscow/Moscow	Human	unknown	unknown	unknown	Illumina NextSeq	bwa mapping + consensus		Chief Federal State Budgetary Healthcare Institution “Centre of Hygiene and Epidemiology” of the Federal Medical Biological Agency, Central laboratory of microbiological and clinical diagnostic tests		Federal State Budgetary Institution “Centre for Strategic Planning and Management of Biomedical Health Risks” of the Federal Medical Biological Agency, Laboratory for advanced molecular diagnostics of human diseases.	119121, Moscow, Russia, Pogodinskaya str. 10	LQ-21075_S33/2022
123333	csp_omicron.fasta	hCoV-19/Russia/MOW-CSP-LQ-21079_S34/2022	betacoronavirus	Original	2022-01-09	Europe/Russia/Moscow/Moscow	Human	unknown	unknown	unknown	Illumina NextSeq	bwa mapping + consensus		Chief Federal State Budgetary Healthcare Institution “Centre of Hygiene and Epidemiology” of the Federal Medical Biological Agency, Central laboratory of microbiological and clinical diagnostic tests		Federal State Budgetary Institution “Centre for Strategic Planning and Management of Biomedical Health Risks” of the Federal Medical Biological Agency, Laboratory for advanced molecular diagnostics of human diseases.	119121, Moscow, Russia, Pogodinskaya str. 10	LQ-21079_S34/2022
123333	csp_omicron.fasta	hCoV-19/Russia/MOW-CSP-LQ-21093_S82/2022	betacoronavirus	Original	2022-01-09	Europe/Russia/Moscow/Moscow	Human	unknown	unknown	unknown	Illumina NextSeq	bwa mapping + consensus		Chief Federal State Budgetary Healthcare Institution “Centre of Hygiene and Epidemiology” of the Federal Medical Biological Agency, Central laboratory of microbiological and clinical diagnostic tests		Federal State Budgetary Institution “Centre for Strategic Planning and Management of Biomedical Health Risks” of the Federal Medical Biological Agency, Laboratory for advanced molecular diagnostics of human diseases.	119121, Moscow, Russia, Pogodinskaya str. 10	LQ-21093_S82/2022
123333	csp_omicron.fasta	hCoV-19/Russia/MOW-CSP-LQ-21095_S35/2022	betacoronavirus	Original	2022-01-09	Europe/Russia/Moscow/Moscow	Human	unknown	unknown	unknown	Illumina NextSeq	bwa mapping + consensus		Chief Federal State Budgetary Healthcare Institution “Centre of Hygiene and Epidemiology” of the Federal Medical Biological Agency, Central laboratory of microbiological and clinical diagnostic tests		Federal State Budgetary Institution “Centre for Strategic Planning and Management of Biomedical Health Risks” of the Federal Medical Biological Agency, Laboratory for advanced molecular diagnostics of human diseases.	119121, Moscow, Russia, Pogodinskaya str. 10	LQ-21095_S35/2022
123333	csp_omicron.fasta	hCoV-19/Russia/MOW-CSP-LQ-21096_S36/2022	betacoronavirus	Original	2022-01-11	Europe/Russia/Moscow/Moscow	Human	unknown	unknown	unknown	Illumina NextSeq	bwa mapping + consensus		Chief Federal State Budgetary Healthcare Institution “Centre of Hygiene and Epidemiology” of the Federal Medical Biological Agency, Central laboratory of microbiological and clinical diagnostic tests		Federal State Budgetary Institution “Centre for Strategic Planning and Management of Biomedical Health Risks” of the Federal Medical Biological Agency, Laboratory for advanced molecular diagnostics of human diseases.	119121, Moscow, Russia, Pogodinskaya str. 10	LQ-21096_S36/2022
123333	csp_omicron.fasta	hCoV-19/Russia/MOW-CSP-LQ-21098_S37/2022	betacoronavirus	Original	2022-01-11	Europe/Russia/Moscow/Moscow	Human	unknown	unknown	unknown	Illumina NextSeq	bwa mapping + consensus		Chief Federal State Budgetary Healthcare Institution “Centre of Hygiene and Epidemiology” of the Federal Medical Biological Agency, Central laboratory of microbiological and clinical diagnostic tests		Federal State Budgetary Institution “Centre for Strategic Planning and Management of Biomedical Health Risks” of the Federal Medical Biological Agency, Laboratory for advanced molecular diagnostics of human diseases.	119121, Moscow, Russia, Pogodinskaya str. 10	LQ-21098_S37/2022
123333	csp_omicron.fasta	hCoV-19/Russia/MOW-CSP-LQ-21101_S40/2022	betacoronavirus	Original	2022-01-11	Europe/Russia/Moscow/Moscow	Human	unknown	unknown	unknown	Illumina NextSeq	bwa mapping + consensus		Chief Federal State Budgetary Healthcare Institution “Centre of Hygiene and Epidemiology” of the Federal Medical Biological Agency, Central laboratory of microbiological and clinical diagnostic tests		Federal State Budgetary Institution “Centre for Strategic Planning and Management of Biomedical Health Risks” of the Federal Medical Biological Agency, Laboratory for advanced molecular diagnostics of human diseases.	119121, Moscow, Russia, Pogodinskaya str. 10	LQ-21101_S40/2022
123333	csp_omicron.fasta	hCoV-19/Russia/MOW-CSP-LQ-21103_S41/2022	betacoronavirus	Original	2022-01-11	Europe/Russia/Moscow/Moscow	Human	unknown	unknown	unknown	Illumina NextSeq	bwa mapping + consensus		Chief Federal State Budgetary Healthcare Institution “Centre of Hygiene and Epidemiology” of the Federal Medical Biological Agency, Central laboratory of microbiological and clinical diagnostic tests		Federal State Budgetary Institution “Centre for Strategic Planning and Management of Biomedical Health Risks” of the Federal Medical Biological Agency, Laboratory for advanced molecular diagnostics of human diseases.	119121, Moscow, Russia, Pogodinskaya str. 10	LQ-21103_S41/2022
123333	csp_omicron.fasta	hCoV-19/Russia/MOW-CSP-LQ-21106_S42/2022	betacoronavirus	Original	2022-01-11	Europe/Russia/Moscow/Moscow	Human	unknown	unknown	unknown	Illumina NextSeq	bwa mapping + consensus		Chief Federal State Budgetary Healthcare Institution “Centre of Hygiene and Epidemiology” of the Federal Medical Biological Agency, Central laboratory of microbiological and clinical diagnostic tests		Federal State Budgetary Institution “Centre for Strategic Planning and Management of Biomedical Health Risks” of the Federal Medical Biological Agency, Laboratory for advanced molecular diagnostics of human diseases.	119121, Moscow, Russia, Pogodinskaya str. 10	LQ-21106_S42/2022
123333	csp_omicron.fasta	hCoV-19/Russia/MOW-CSP-LQ-21108_S83/2022	betacoronavirus	Original	2022-01-11	Europe/Russia/Moscow/Moscow	Human	unknown	unknown	unknown	Illumina NextSeq	bwa mapping + consensus		Chief Federal State Budgetary Healthcare Institution “Centre of Hygiene and Epidemiology” of the Federal Medical Biological Agency, Central laboratory of microbiological and clinical diagnostic tests		Federal State Budgetary Institution “Centre for Strategic Planning and Management of Biomedical Health Risks” of the Federal Medical Biological Agency, Laboratory for advanced molecular diagnostics of human diseases.	119121, Moscow, Russia, Pogodinskaya str. 10	LQ-21108_S83/2022
123333	csp_omicron.fasta	hCoV-19/Russia/MOW-CSP-LQ-21109_S44/2022	betacoronavirus	Original	2022-01-11	Europe/Russia/Moscow/Moscow	Human	unknown	unknown	unknown	Illumina NextSeq	bwa mapping + consensus		Chief Federal State Budgetary Healthcare Institution “Centre of Hygiene and Epidemiology” of the Federal Medical Biological Agency, Central laboratory of microbiological and clinical diagnostic tests		Federal State Budgetary Institution “Centre for Strategic Planning and Management of Biomedical Health Risks” of the Federal Medical Biological Agency, Laboratory for advanced molecular diagnostics of human diseases.	119121, Moscow, Russia, Pogodinskaya str. 10	LQ-21109_S44/2022
123333	csp_omicron.fasta	hCoV-19/Russia/MOW-CSP-LQ-21110_S45/2022	betacoronavirus	Original	2022-01-11	Europe/Russia/Moscow/Moscow	Human	unknown	unknown	unknown	Illumina NextSeq	bwa mapping + consensus		Chief Federal State Budgetary Healthcare Institution “Centre of Hygiene and Epidemiology” of the Federal Medical Biological Agency, Central laboratory of microbiological and clinical diagnostic tests		Federal State Budgetary Institution “Centre for Strategic Planning and Management of Biomedical Health Risks” of the Federal Medical Biological Agency, Laboratory for advanced molecular diagnostics of human diseases.	119121, Moscow, Russia, Pogodinskaya str. 10	LQ-21110_S45/2022
123333	csp_omicron.fasta	hCoV-19/Russia/MOW-CSP-LQ-21111_S46/2022	betacoronavirus	Original	2022-01-11	Europe/Russia/Moscow/Moscow	Human	unknown	unknown	unknown	Illumina NextSeq	bwa mapping + consensus		Chief Federal State Budgetary Healthcare Institution “Centre of Hygiene and Epidemiology” of the Federal Medical Biological Agency, Central laboratory of microbiological and clinical diagnostic tests		Federal State Budgetary Institution “Centre for Strategic Planning and Management of Biomedical Health Risks” of the Federal Medical Biological Agency, Laboratory for advanced molecular diagnostics of human diseases.	119121, Moscow, Russia, Pogodinskaya str. 10	LQ-21111_S46/2022
123333	csp_omicron.fasta	hCoV-19/Russia/MOW-CSP-LQ-21112_S84/2022	betacoronavirus	Original	2022-01-11	Europe/Russia/Moscow/Moscow	Human	unknown	unknown	unknown	Illumina NextSeq	bwa mapping + consensus		Chief Federal State Budgetary Healthcare Institution “Centre of Hygiene and Epidemiology” of the Federal Medical Biological Agency, Central laboratory of microbiological and clinical diagnostic tests		Federal State Budgetary Institution “Centre for Strategic Planning and Management of Biomedical Health Risks” of the Federal Medical Biological Agency, Laboratory for advanced molecular diagnostics of human diseases.	119121, Moscow, Russia, Pogodinskaya str. 10	LQ-21112_S84/2022
123333	csp_omicron.fasta	hCoV-19/Russia/MOW-CSP-LQ-21114_S47/2022	betacoronavirus	Original	2022-01-11	Europe/Russia/Moscow/Moscow	Human	unknown	unknown	unknown	Illumina NextSeq	bwa mapping + consensus		Chief Federal State Budgetary Healthcare Institution “Centre of Hygiene and Epidemiology” of the Federal Medical Biological Agency, Central laboratory of microbiological and clinical diagnostic tests		Federal State Budgetary Institution “Centre for Strategic Planning and Management of Biomedical Health Risks” of the Federal Medical Biological Agency, Laboratory for advanced molecular diagnostics of human diseases.	119121, Moscow, Russia, Pogodinskaya str. 10	LQ-21114_S47/2022
123333	csp_omicron.fasta	hCoV-19/Russia/MOW-CSP-LQ-21115_S48/2022	betacoronavirus	Original	2022-01-11	Europe/Russia/Moscow/Moscow	Human	unknown	unknown	unknown	Illumina NextSeq	bwa mapping + consensus		Chief Federal State Budgetary Healthcare Institution “Centre of Hygiene and Epidemiology” of the Federal Medical Biological Agency, Central laboratory of microbiological and clinical diagnostic tests		Federal State Budgetary Institution “Centre for Strategic Planning and Management of Biomedical Health Risks” of the Federal Medical Biological Agency, Laboratory for advanced molecular diagnostics of human diseases.	119121, Moscow, Russia, Pogodinskaya str. 10	LQ-21115_S48/2022
123333	csp_omicron.fasta	hCoV-19/Russia/MOW-CSP-LQ-21118_S85/2022	betacoronavirus	Original	2022-01-11	Europe/Russia/Moscow/Moscow	Human	unknown	unknown	unknown	Illumina NextSeq	bwa mapping + consensus		Chief Federal State Budgetary Healthcare Institution “Centre of Hygiene and Epidemiology” of the Federal Medical Biological Agency, Central laboratory of microbiological and clinical diagnostic tests		Federal State Budgetary Institution “Centre for Strategic Planning and Management of Biomedical Health Risks” of the Federal Medical Biological Agency, Laboratory for advanced molecular diagnostics of human diseases.	119121, Moscow, Russia, Pogodinskaya str. 10	LQ-21118_S85/2022
123333	csp_omicron.fasta	hCoV-19/Russia/MOW-CSP-LQ-21119_S86/2022	betacoronavirus	Original	2022-01-11	Europe/Russia/Moscow/Moscow	Human	unknown	unknown	unknown	Illumina NextSeq	bwa mapping + consensus		Chief Federal State Budgetary Healthcare Institution “Centre of Hygiene and Epidemiology” of the Federal Medical Biological Agency, Central laboratory of microbiological and clinical diagnostic tests		Federal State Budgetary Institution “Centre for Strategic Planning and Management of Biomedical Health Risks” of the Federal Medical Biological Agency, Laboratory for advanced molecular diagnostics of human diseases.	119121, Moscow, Russia, Pogodinskaya str. 10	LQ-21119_S86/2022
123333	csp_omicron.fasta	hCoV-19/Russia/MOW-CSP-LQ-21121_S49/2022	betacoronavirus	Original	2022-01-11	Europe/Russia/Moscow/Moscow	Human	unknown	unknown	unknown	Illumina NextSeq	bwa mapping + consensus		Chief Federal State Budgetary Healthcare Institution “Centre of Hygiene and Epidemiology” of the Federal Medical Biological Agency, Central laboratory of microbiological and clinical diagnostic tests		Federal State Budgetary Institution “Centre for Strategic Planning and Management of Biomedical Health Risks” of the Federal Medical Biological Agency, Laboratory for advanced molecular diagnostics of human diseases.	119121, Moscow, Russia, Pogodinskaya str. 10	LQ-21121_S49/2022
123333	csp_omicron.fasta	hCoV-19/Russia/MOW-CSP-LQ-21122_S50/2022	betacoronavirus	Original	2022-01-11	Europe/Russia/Moscow/Moscow	Human	unknown	unknown	unknown	Illumina NextSeq	bwa mapping + consensus		Chief Federal State Budgetary Healthcare Institution “Centre of Hygiene and Epidemiology” of the Federal Medical Biological Agency, Central laboratory of microbiological and clinical diagnostic tests		Federal State Budgetary Institution “Centre for Strategic Planning and Management of Biomedical Health Risks” of the Federal Medical Biological Agency, Laboratory for advanced molecular diagnostics of human diseases.	119121, Moscow, Russia, Pogodinskaya str. 10	LQ-21122_S50/2022
123333	csp_omicron.fasta	hCoV-19/Russia/MOW-CSP-LQ-21123_S51/2022	betacoronavirus	Original	2022-01-11	Europe/Russia/Moscow/Moscow	Human	unknown	unknown	unknown	Illumina NextSeq	bwa mapping + consensus		Chief Federal State Budgetary Healthcare Institution “Centre of Hygiene and Epidemiology” of the Federal Medical Biological Agency, Central laboratory of microbiological and clinical diagnostic tests		Federal State Budgetary Institution “Centre for Strategic Planning and Management of Biomedical Health Risks” of the Federal Medical Biological Agency, Laboratory for advanced molecular diagnostics of human diseases.	119121, Moscow, Russia, Pogodinskaya str. 10	LQ-21123_S51/2022
123333	csp_omicron.fasta	hCoV-19/Russia/MOW-CSP-LQ-21124_S52/2022	betacoronavirus	Original	2022-01-11	Europe/Russia/Moscow/Moscow	Human	unknown	unknown	unknown	Illumina NextSeq	bwa mapping + consensus		Chief Federal State Budgetary Healthcare Institution “Centre of Hygiene and Epidemiology” of the Federal Medical Biological Agency, Central laboratory of microbiological and clinical diagnostic tests		Federal State Budgetary Institution “Centre for Strategic Planning and Management of Biomedical Health Risks” of the Federal Medical Biological Agency, Laboratory for advanced molecular diagnostics of human diseases.	119121, Moscow, Russia, Pogodinskaya str. 10	LQ-21124_S52/2022
123333	csp_omicron.fasta	hCoV-19/Russia/MOW-CSP-LQ-21130_S53/2022	betacoronavirus	Original	2022-01-11	Europe/Russia/Moscow/Moscow	Human	unknown	unknown	unknown	Illumina NextSeq	bwa mapping + consensus		Chief Federal State Budgetary Healthcare Institution “Centre of Hygiene and Epidemiology” of the Federal Medical Biological Agency, Central laboratory of microbiological and clinical diagnostic tests		Federal State Budgetary Institution “Centre for Strategic Planning and Management of Biomedical Health Risks” of the Federal Medical Biological Agency, Laboratory for advanced molecular diagnostics of human diseases.	119121, Moscow, Russia, Pogodinskaya str. 10	LQ-21130_S53/2022
123333	csp_omicron.fasta	hCoV-19/Russia/MOW-CSP-LQ-21135_S54/2022	betacoronavirus	Original	2022-01-11	Europe/Russia/Moscow/Moscow	Human	unknown	unknown	unknown	Illumina NextSeq	bwa mapping + consensus		Chief Federal State Budgetary Healthcare Institution “Centre of Hygiene and Epidemiology” of the Federal Medical Biological Agency, Central laboratory of microbiological and clinical diagnostic tests		Federal State Budgetary Institution “Centre for Strategic Planning and Management of Biomedical Health Risks” of the Federal Medical Biological Agency, Laboratory for advanced molecular diagnostics of human diseases.	119121, Moscow, Russia, Pogodinskaya str. 10	LQ-21135_S54/2022
123333	csp_omicron.fasta	hCoV-19/Russia/MOW-CSP-LQ-21138_S55/2022	betacoronavirus	Original	2022-01-11	Europe/Russia/Moscow/Moscow	Human	unknown	unknown	unknown	Illumina NextSeq	bwa mapping + consensus		Chief Federal State Budgetary Healthcare Institution “Centre of Hygiene and Epidemiology” of the Federal Medical Biological Agency, Central laboratory of microbiological and clinical diagnostic tests		Federal State Budgetary Institution “Centre for Strategic Planning and Management of Biomedical Health Risks” of the Federal Medical Biological Agency, Laboratory for advanced molecular diagnostics of human diseases.	119121, Moscow, Russia, Pogodinskaya str. 10	LQ-21138_S55/2022
123333	csp_omicron.fasta	hCoV-19/Russia/MOW-CSP-LQ-21141_S87/2022	betacoronavirus	Original	2022-01-11	Europe/Russia/Moscow/Moscow	Human	unknown	unknown	unknown	Illumina NextSeq	bwa mapping + consensus		Chief Federal State Budgetary Healthcare Institution “Centre of Hygiene and Epidemiology” of the Federal Medical Biological Agency, Central laboratory of microbiological and clinical diagnostic tests		Federal State Budgetary Institution “Centre for Strategic Planning and Management of Biomedical Health Risks” of the Federal Medical Biological Agency, Laboratory for advanced molecular diagnostics of human diseases.	119121, Moscow, Russia, Pogodinskaya str. 10	LQ-21141_S87/2022
123333	csp_omicron.fasta	hCoV-19/Russia/MOW-CSP-LQ-21143_S56/2022	betacoronavirus	Original	2022-01-11	Europe/Russia/Moscow/Moscow	Human	unknown	unknown	unknown	Illumina NextSeq	bwa mapping + consensus		Chief Federal State Budgetary Healthcare Institution “Centre of Hygiene and Epidemiology” of the Federal Medical Biological Agency, Central laboratory of microbiological and clinical diagnostic tests		Federal State Budgetary Institution “Centre for Strategic Planning and Management of Biomedical Health Risks” of the Federal Medical Biological Agency, Laboratory for advanced molecular diagnostics of human diseases.	119121, Moscow, Russia, Pogodinskaya str. 10	LQ-21143_S56/2022
123333	csp_omicron.fasta	hCoV-19/Russia/MOW-CSP-LQ-21147_S57/2022	betacoronavirus	Original	2022-01-11	Europe/Russia/Moscow/Moscow	Human	unknown	unknown	unknown	Illumina NextSeq	bwa mapping + consensus		Chief Federal State Budgetary Healthcare Institution “Centre of Hygiene and Epidemiology” of the Federal Medical Biological Agency, Central laboratory of microbiological and clinical diagnostic tests		Federal State Budgetary Institution “Centre for Strategic Planning and Management of Biomedical Health Risks” of the Federal Medical Biological Agency, Laboratory for advanced molecular diagnostics of human diseases.	119121, Moscow, Russia, Pogodinskaya str. 10	LQ-21147_S57/2022
123333	csp_omicron.fasta	hCoV-19/Russia/MOW-CSP-LQ-21152_S58/2022	betacoronavirus	Original	2022-01-11	Europe/Russia/Moscow/Moscow	Human	unknown	unknown	unknown	Illumina NextSeq	bwa mapping + consensus		Chief Federal State Budgetary Healthcare Institution “Centre of Hygiene and Epidemiology” of the Federal Medical Biological Agency, Central laboratory of microbiological and clinical diagnostic tests		Federal State Budgetary Institution “Centre for Strategic Planning and Management of Biomedical Health Risks” of the Federal Medical Biological Agency, Laboratory for advanced molecular diagnostics of human diseases.	119121, Moscow, Russia, Pogodinskaya str. 10	LQ-21152_S58/2022
123333	csp_omicron.fasta	hCoV-19/Russia/MOW-CSP-LQ-21156_S88/2022	betacoronavirus	Original	2022-01-11	Europe/Russia/Moscow/Moscow	Human	unknown	unknown	unknown	Illumina NextSeq	bwa mapping + consensus		Chief Federal State Budgetary Healthcare Institution “Centre of Hygiene and Epidemiology” of the Federal Medical Biological Agency, Central laboratory of microbiological and clinical diagnostic tests		Federal State Budgetary Institution “Centre for Strategic Planning and Management of Biomedical Health Risks” of the Federal Medical Biological Agency, Laboratory for advanced molecular diagnostics of human diseases.	119121, Moscow, Russia, Pogodinskaya str. 10	LQ-21156_S88/2022
123333	csp_omicron.fasta	hCoV-19/Russia/MOW-CSP-LQ-21160_S59/2022	betacoronavirus	Original	2022-01-11	Europe/Russia/Moscow/Moscow	Human	unknown	unknown	unknown	Illumina NextSeq	bwa mapping + consensus		Chief Federal State Budgetary Healthcare Institution “Centre of Hygiene and Epidemiology” of the Federal Medical Biological Agency, Central laboratory of microbiological and clinical diagnostic tests		Federal State Budgetary Institution “Centre for Strategic Planning and Management of Biomedical Health Risks” of the Federal Medical Biological Agency, Laboratory for advanced molecular diagnostics of human diseases.	119121, Moscow, Russia, Pogodinskaya str. 10	LQ-21160_S59/2022
123333	csp_omicron.fasta	hCoV-19/Russia/MOW-CSP-LQ-21162_S60/2022	betacoronavirus	Original	2022-01-11	Europe/Russia/Moscow/Moscow	Human	unknown	unknown	unknown	Illumina NextSeq	bwa mapping + consensus		Chief Federal State Budgetary Healthcare Institution “Centre of Hygiene and Epidemiology” of the Federal Medical Biological Agency, Central laboratory of microbiological and clinical diagnostic tests		Federal State Budgetary Institution “Centre for Strategic Planning and Management of Biomedical Health Risks” of the Federal Medical Biological Agency, Laboratory for advanced molecular diagnostics of human diseases.	119121, Moscow, Russia, Pogodinskaya str. 10	LQ-21162_S60/2022
123333	csp_omicron.fasta	hCoV-19/Russia/MOW-CSP-LQ-21163_S61/2022	betacoronavirus	Original	2022-01-11	Europe/Russia/Moscow/Moscow	Human	unknown	unknown	unknown	Illumina NextSeq	bwa mapping + consensus		Chief Federal State Budgetary Healthcare Institution “Centre of Hygiene and Epidemiology” of the Federal Medical Biological Agency, Central laboratory of microbiological and clinical diagnostic tests		Federal State Budgetary Institution “Centre for Strategic Planning and Management of Biomedical Health Risks” of the Federal Medical Biological Agency, Laboratory for advanced molecular diagnostics of human diseases.	119121, Moscow, Russia, Pogodinskaya str. 10	LQ-21163_S61/2022
123333	csp_omicron.fasta	hCoV-19/Russia/MOW-CSP-LQ-21167_S62/2022	betacoronavirus	Original	2022-01-11	Europe/Russia/Moscow/Moscow	Human	unknown	unknown	unknown	Illumina NextSeq	bwa mapping + consensus		Chief Federal State Budgetary Healthcare Institution “Centre of Hygiene and Epidemiology” of the Federal Medical Biological Agency, Central laboratory of microbiological and clinical diagnostic tests		Federal State Budgetary Institution “Centre for Strategic Planning and Management of Biomedical Health Risks” of the Federal Medical Biological Agency, Laboratory for advanced molecular diagnostics of human diseases.	119121, Moscow, Russia, Pogodinskaya str. 10	LQ-21167_S62/2022
123333	csp_omicron.fasta	hCoV-19/Russia/MOW-CSP-LQ-21170_S64/2022	betacoronavirus	Original	2022-01-11	Europe/Russia/Moscow/Moscow	Human	unknown	unknown	unknown	Illumina NextSeq	bwa mapping + consensus		Chief Federal State Budgetary Healthcare Institution “Centre of Hygiene and Epidemiology” of the Federal Medical Biological Agency, Central laboratory of microbiological and clinical diagnostic tests		Federal State Budgetary Institution “Centre for Strategic Planning and Management of Biomedical Health Risks” of the Federal Medical Biological Agency, Laboratory for advanced molecular diagnostics of human diseases.	119121, Moscow, Russia, Pogodinskaya str. 10	LQ-21170_S64/2022
123333	csp_omicron.fasta	hCoV-19/Russia/MOW-CSP-LQ-21173_S66/2022	betacoronavirus	Original	2022-01-11	Europe/Russia/Moscow/Moscow	Human	unknown	unknown	unknown	Illumina NextSeq	bwa mapping + consensus		Chief Federal State Budgetary Healthcare Institution “Centre of Hygiene and Epidemiology” of the Federal Medical Biological Agency, Central laboratory of microbiological and clinical diagnostic tests		Federal State Budgetary Institution “Centre for Strategic Planning and Management of Biomedical Health Risks” of the Federal Medical Biological Agency, Laboratory for advanced molecular diagnostics of human diseases.	119121, Moscow, Russia, Pogodinskaya str. 10	LQ-21173_S66/2022
123333	csp_omicron.fasta	hCoV-19/Russia/MOW-CSP-LQ-21174_S67/2022	betacoronavirus	Original	2022-01-11	Europe/Russia/Moscow/Moscow	Human	unknown	unknown	unknown	Illumina NextSeq	bwa mapping + consensus		Chief Federal State Budgetary Healthcare Institution “Centre of Hygiene and Epidemiology” of the Federal Medical Biological Agency, Central laboratory of microbiological and clinical diagnostic tests		Federal State Budgetary Institution “Centre for Strategic Planning and Management of Biomedical Health Risks” of the Federal Medical Biological Agency, Laboratory for advanced molecular diagnostics of human diseases.	119121, Moscow, Russia, Pogodinskaya str. 10	LQ-21174_S67/2022
123333	csp_omicron.fasta	hCoV-19/Russia/MOW-CSP-LQ-21176_S68/2022	betacoronavirus	Original	2022-01-11	Europe/Russia/Moscow/Moscow	Human	unknown	unknown	unknown	Illumina NextSeq	bwa mapping + consensus		Chief Federal State Budgetary Healthcare Institution “Centre of Hygiene and Epidemiology” of the Federal Medical Biological Agency, Central laboratory of microbiological and clinical diagnostic tests		Federal State Budgetary Institution “Centre for Strategic Planning and Management of Biomedical Health Risks” of the Federal Medical Biological Agency, Laboratory for advanced molecular diagnostics of human diseases.	119121, Moscow, Russia, Pogodinskaya str. 10	LQ-21176_S68/2022
123333	csp_omicron.fasta	hCoV-19/Russia/MOW-CSP-LQ-21179_S70/2022	betacoronavirus	Original	2022-01-11	Europe/Russia/Moscow/Moscow	Human	unknown	unknown	unknown	Illumina NextSeq	bwa mapping + consensus		Chief Federal State Budgetary Healthcare Institution “Centre of Hygiene and Epidemiology” of the Federal Medical Biological Agency, Central laboratory of microbiological and clinical diagnostic tests		Federal State Budgetary Institution “Centre for Strategic Planning and Management of Biomedical Health Risks” of the Federal Medical Biological Agency, Laboratory for advanced molecular diagnostics of human diseases.	119121, Moscow, Russia, Pogodinskaya str. 10	LQ-21179_S70/2022
123333	csp_omicron.fasta	hCoV-19/Russia/MOW-CSP-LQ-21180_S71/2022	betacoronavirus	Original	2022-01-11	Europe/Russia/Moscow/Moscow	Human	unknown	unknown	unknown	Illumina NextSeq	bwa mapping + consensus		Chief Federal State Budgetary Healthcare Institution “Centre of Hygiene and Epidemiology” of the Federal Medical Biological Agency, Central laboratory of microbiological and clinical diagnostic tests		Federal State Budgetary Institution “Centre for Strategic Planning and Management of Biomedical Health Risks” of the Federal Medical Biological Agency, Laboratory for advanced molecular diagnostics of human diseases.	119121, Moscow, Russia, Pogodinskaya str. 10	LQ-21180_S71/2022
123333	csp_omicron.fasta	hCoV-19/Russia/MOW-CSP-LQ-21185_S72/2022	betacoronavirus	Original	2022-01-11	Europe/Russia/Moscow/Moscow	Human	unknown	unknown	unknown	Illumina NextSeq	bwa mapping + consensus		Chief Federal State Budgetary Healthcare Institution “Centre of Hygiene and Epidemiology” of the Federal Medical Biological Agency, Central laboratory of microbiological and clinical diagnostic tests		Federal State Budgetary Institution “Centre for Strategic Planning and Management of Biomedical Health Risks” of the Federal Medical Biological Agency, Laboratory for advanced molecular diagnostics of human diseases.	119121, Moscow, Russia, Pogodinskaya str. 10	LQ-21185_S72/2022
123333	csp_omicron.fasta	hCoV-19/Russia/MOW-CSP-LQ-21198_S73/2022	betacoronavirus	Original	2022-01-11	Europe/Russia/Moscow/Moscow	Human	unknown	unknown	unknown	Illumina NextSeq	bwa mapping + consensus		Chief Federal State Budgetary Healthcare Institution “Centre of Hygiene and Epidemiology” of the Federal Medical Biological Agency, Central laboratory of microbiological and clinical diagnostic tests		Federal State Budgetary Institution “Centre for Strategic Planning and Management of Biomedical Health Risks” of the Federal Medical Biological Agency, Laboratory for advanced molecular diagnostics of human diseases.	119121, Moscow, Russia, Pogodinskaya str. 10	LQ-21198_S73/2022
123333	csp_omicron.fasta	hCoV-19/Russia/MOW-CSP-LQ-21204_S74/2022	betacoronavirus	Original	2022-01-11	Europe/Russia/Moscow/Moscow	Human	unknown	unknown	unknown	Illumina NextSeq	bwa mapping + consensus		Chief Federal State Budgetary Healthcare Institution “Centre of Hygiene and Epidemiology” of the Federal Medical Biological Agency, Central laboratory of microbiological and clinical diagnostic tests		Federal State Budgetary Institution “Centre for Strategic Planning and Management of Biomedical Health Risks” of the Federal Medical Biological Agency, Laboratory for advanced molecular diagnostics of human diseases.	119121, Moscow, Russia, Pogodinskaya str. 10	LQ-21204_S74/2022
123333	csp_omicron.fasta	hCoV-19/Russia/MOW-CSP-LQ-21205_S75/2022	betacoronavirus	Original	2022-01-11	Europe/Russia/Moscow/Moscow	Human	unknown	unknown	unknown	Illumina NextSeq	bwa mapping + consensus		Chief Federal State Budgetary Healthcare Institution “Centre of Hygiene and Epidemiology” of the Federal Medical Biological Agency, Central laboratory of microbiological and clinical diagnostic tests		Federal State Budgetary Institution “Centre for Strategic Planning and Management of Biomedical Health Risks” of the Federal Medical Biological Agency, Laboratory for advanced molecular diagnostics of human diseases.	119121, Moscow, Russia, Pogodinskaya str. 10	LQ-21205_S75/2022
123333	csp_omicron.fasta	hCoV-19/Russia/MOW-CSP-LQ-21255_S92/2022	betacoronavirus	Original	2022-01-14	Europe/Russia/Moscow/Moscow	Human	unknown	unknown	unknown	Illumina NextSeq	bwa mapping + consensus		Chief Federal State Budgetary Healthcare Institution “Centre of Hygiene and Epidemiology” of the Federal Medical Biological Agency, Central laboratory of microbiological and clinical diagnostic tests		Federal State Budgetary Institution “Centre for Strategic Planning and Management of Biomedical Health Risks” of the Federal Medical Biological Agency, Laboratory for advanced molecular diagnostics of human diseases.	119121, Moscow, Russia, Pogodinskaya str. 10	LQ-21255_S92/2022
123333	csp_omicron.fasta	hCoV-19/Russia/MOW-CSP-LQ-21258_S93/2022	betacoronavirus	Original	2022-01-14	Europe/Russia/Moscow/Moscow	Human	unknown	unknown	unknown	Illumina NextSeq	bwa mapping + consensus		Chief Federal State Budgetary Healthcare Institution “Centre of Hygiene and Epidemiology” of the Federal Medical Biological Agency, Central laboratory of microbiological and clinical diagnostic tests		Federal State Budgetary Institution “Centre for Strategic Planning and Management of Biomedical Health Risks” of the Federal Medical Biological Agency, Laboratory for advanced molecular diagnostics of human diseases.	119121, Moscow, Russia, Pogodinskaya str. 10	LQ-21258_S93/2022
123333	csp_omicron.fasta	hCoV-19/Russia/MOW-CSP-LQ-21259_S94/2022	betacoronavirus	Original	2022-01-14	Europe/Russia/Moscow/Moscow	Human	unknown	unknown	unknown	Illumina NextSeq	bwa mapping + consensus		Chief Federal State Budgetary Healthcare Institution “Centre of Hygiene and Epidemiology” of the Federal Medical Biological Agency, Central laboratory of microbiological and clinical diagnostic tests		Federal State Budgetary Institution “Centre for Strategic Planning and Management of Biomedical Health Risks” of the Federal Medical Biological Agency, Laboratory for advanced molecular diagnostics of human diseases.	119121, Moscow, Russia, Pogodinskaya str. 10	LQ-21259_S94/2022
123333	csp_omicron.fasta	hCoV-19/Russia/MOW-CSP-LQ-21269_S95/2022	betacoronavirus	Original	2022-01-14	Europe/Russia/Moscow/Moscow	Human	unknown	unknown	unknown	Illumina NextSeq	bwa mapping + consensus		Chief Federal State Budgetary Healthcare Institution “Centre of Hygiene and Epidemiology” of the Federal Medical Biological Agency, Central laboratory of microbiological and clinical diagnostic tests		Federal State Budgetary Institution “Centre for Strategic Planning and Management of Biomedical Health Risks” of the Federal Medical Biological Agency, Laboratory for advanced molecular diagnostics of human diseases.	119121, Moscow, Russia, Pogodinskaya str. 10	LQ-21269_S95/2022
123333	csp_omicron.fasta	hCoV-19/Russia/MOW-CSP-LQ-21273_S96/2022	betacoronavirus	Original	2022-01-14	Europe/Russia/Moscow/Moscow	Human	unknown	unknown	unknown	Illumina NextSeq	bwa mapping + consensus		Chief Federal State Budgetary Healthcare Institution “Centre of Hygiene and Epidemiology” of the Federal Medical Biological Agency, Central laboratory of microbiological and clinical diagnostic tests		Federal State Budgetary Institution “Centre for Strategic Planning and Management of Biomedical Health Risks” of the Federal Medical Biological Agency, Laboratory for advanced molecular diagnostics of human diseases.	119121, Moscow, Russia, Pogodinskaya str. 10	LQ-21273_S96/2022
123333	csp_omicron.fasta	hCoV-19/Russia/MOW-CSP-LQ-21274_S97/2022	betacoronavirus	Original	2022-01-14	Europe/Russia/Moscow/Moscow	Human	unknown	unknown	unknown	Illumina NextSeq	bwa mapping + consensus		Chief Federal State Budgetary Healthcare Institution “Centre of Hygiene and Epidemiology” of the Federal Medical Biological Agency, Central laboratory of microbiological and clinical diagnostic tests		Federal State Budgetary Institution “Centre for Strategic Planning and Management of Biomedical Health Risks” of the Federal Medical Biological Agency, Laboratory for advanced molecular diagnostics of human diseases.	119121, Moscow, Russia, Pogodinskaya str. 10	LQ-21274_S97/2022
123333	csp_omicron.fasta	hCoV-19/Russia/MOW-CSP-LQ-21276_S98/2022	betacoronavirus	Original	2022-01-14	Europe/Russia/Moscow/Moscow	Human	unknown	unknown	unknown	Illumina NextSeq	bwa mapping + consensus		Chief Federal State Budgetary Healthcare Institution “Centre of Hygiene and Epidemiology” of the Federal Medical Biological Agency, Central laboratory of microbiological and clinical diagnostic tests		Federal State Budgetary Institution “Centre for Strategic Planning and Management of Biomedical Health Risks” of the Federal Medical Biological Agency, Laboratory for advanced molecular diagnostics of human diseases.	119121, Moscow, Russia, Pogodinskaya str. 10	LQ-21276_S98/2022
123333	csp_omicron.fasta	hCoV-19/Russia/MOW-CSP-LQ-21278_S99/2022	betacoronavirus	Original	2022-01-14	Europe/Russia/Moscow/Moscow	Human	unknown	unknown	unknown	Illumina NextSeq	bwa mapping + consensus		Chief Federal State Budgetary Healthcare Institution “Centre of Hygiene and Epidemiology” of the Federal Medical Biological Agency, Central laboratory of microbiological and clinical diagnostic tests		Federal State Budgetary Institution “Centre for Strategic Planning and Management of Biomedical Health Risks” of the Federal Medical Biological Agency, Laboratory for advanced molecular diagnostics of human diseases.	119121, Moscow, Russia, Pogodinskaya str. 10	LQ-21278_S99/2022
123333	csp_omicron.fasta	hCoV-19/Russia/MOW-CSP-LQ-21279_S100/2022	betacoronavirus	Original	2022-01-14	Europe/Russia/Moscow/Moscow	Human	unknown	unknown	unknown	Illumina NextSeq	bwa mapping + consensus		Chief Federal State Budgetary Healthcare Institution “Centre of Hygiene and Epidemiology” of the Federal Medical Biological Agency, Central laboratory of microbiological and clinical diagnostic tests		Federal State Budgetary Institution “Centre for Strategic Planning and Management of Biomedical Health Risks” of the Federal Medical Biological Agency, Laboratory for advanced molecular diagnostics of human diseases.	119121, Moscow, Russia, Pogodinskaya str. 10	LQ-21279_S100/2022
123333	csp_omicron.fasta	hCoV-19/Russia/MOW-CSP-LQ-21288_S101/2022	betacoronavirus	Original	2022-01-15	Europe/Russia/Moscow/Moscow	Human	unknown	unknown	unknown	Illumina NextSeq	bwa mapping + consensus		Chief Federal State Budgetary Healthcare Institution “Centre of Hygiene and Epidemiology” of the Federal Medical Biological Agency, Central laboratory of microbiological and clinical diagnostic tests		Federal State Budgetary Institution “Centre for Strategic Planning and Management of Biomedical Health Risks” of the Federal Medical Biological Agency, Laboratory for advanced molecular diagnostics of human diseases.	119121, Moscow, Russia, Pogodinskaya str. 10	LQ-21288_S101/2022
123333	csp_omicron.fasta	hCoV-19/Russia/MOW-CSP-LQ-21289_S102/2022	betacoronavirus	Original	2022-01-15	Europe/Russia/Moscow/Moscow	Human	unknown	unknown	unknown	Illumina NextSeq	bwa mapping + consensus		Chief Federal State Budgetary Healthcare Institution “Centre of Hygiene and Epidemiology” of the Federal Medical Biological Agency, Central laboratory of microbiological and clinical diagnostic tests		Federal State Budgetary Institution “Centre for Strategic Planning and Management of Biomedical Health Risks” of the Federal Medical Biological Agency, Laboratory for advanced molecular diagnostics of human diseases.	119121, Moscow, Russia, Pogodinskaya str. 10	LQ-21289_S102/2022
123333	csp_omicron.fasta	hCoV-19/Russia/MOW-CSP-LQ-21290_S103/2022	betacoronavirus	Original	2022-01-15	Europe/Russia/Moscow/Moscow	Human	unknown	unknown	unknown	Illumina NextSeq	bwa mapping + consensus		Chief Federal State Budgetary Healthcare Institution “Centre of Hygiene and Epidemiology” of the Federal Medical Biological Agency, Central laboratory of microbiological and clinical diagnostic tests		Federal State Budgetary Institution “Centre for Strategic Planning and Management of Biomedical Health Risks” of the Federal Medical Biological Agency, Laboratory for advanced molecular diagnostics of human diseases.	119121, Moscow, Russia, Pogodinskaya str. 10	LQ-21290_S103/2022
123333	csp_omicron.fasta	hCoV-19/Russia/MOW-CSP-LQ-21300_S104/2022	betacoronavirus	Original	2022-01-15	Europe/Russia/Moscow/Moscow	Human	unknown	unknown	unknown	Illumina NextSeq	bwa mapping + consensus		Chief Federal State Budgetary Healthcare Institution “Centre of Hygiene and Epidemiology” of the Federal Medical Biological Agency, Central laboratory of microbiological and clinical diagnostic tests		Federal State Budgetary Institution “Centre for Strategic Planning and Management of Biomedical Health Risks” of the Federal Medical Biological Agency, Laboratory for advanced molecular diagnostics of human diseases.	119121, Moscow, Russia, Pogodinskaya str. 10	LQ-21300_S104/2022
123333	csp_omicron.fasta	hCoV-19/Russia/MOW-CSP-LQ-21321_S105/2022	betacoronavirus	Original	2022-01-16	Europe/Russia/Moscow/Moscow	Human	unknown	unknown	unknown	Illumina NextSeq	bwa mapping + consensus		Chief Federal State Budgetary Healthcare Institution “Centre of Hygiene and Epidemiology” of the Federal Medical Biological Agency, Central laboratory of microbiological and clinical diagnostic tests		Federal State Budgetary Institution “Centre for Strategic Planning and Management of Biomedical Health Risks” of the Federal Medical Biological Agency, Laboratory for advanced molecular diagnostics of human diseases.	119121, Moscow, Russia, Pogodinskaya str. 10	LQ-21321_S105/2022
123333	csp_omicron.fasta	hCoV-19/Russia/MOW-CSP-LQ-21322_S106/2022	betacoronavirus	Original	2022-01-16	Europe/Russia/Moscow/Moscow	Human	unknown	unknown	unknown	Illumina NextSeq	bwa mapping + consensus		Chief Federal State Budgetary Healthcare Institution “Centre of Hygiene and Epidemiology” of the Federal Medical Biological Agency, Central laboratory of microbiological and clinical diagnostic tests		Federal State Budgetary Institution “Centre for Strategic Planning and Management of Biomedical Health Risks” of the Federal Medical Biological Agency, Laboratory for advanced molecular diagnostics of human diseases.	119121, Moscow, Russia, Pogodinskaya str. 10	LQ-21322_S106/2022
123333	csp_omicron.fasta	hCoV-19/Russia/MOW-CSP-LQ-21323_S107/2022	betacoronavirus	Original	2022-01-16	Europe/Russia/Moscow/Moscow	Human	unknown	unknown	unknown	Illumina NextSeq	bwa mapping + consensus		Chief Federal State Budgetary Healthcare Institution “Centre of Hygiene and Epidemiology” of the Federal Medical Biological Agency, Central laboratory of microbiological and clinical diagnostic tests		Federal State Budgetary Institution “Centre for Strategic Planning and Management of Biomedical Health Risks” of the Federal Medical Biological Agency, Laboratory for advanced molecular diagnostics of human diseases.	119121, Moscow, Russia, Pogodinskaya str. 10	LQ-21323_S107/2022
123333	csp_omicron.fasta	hCoV-19/Russia/MOW-CSP-LQ-21327_S108/2022	betacoronavirus	Original	2022-01-16	Europe/Russia/Moscow/Moscow	Human	unknown	unknown	unknown	Illumina NextSeq	bwa mapping + consensus		Chief Federal State Budgetary Healthcare Institution “Centre of Hygiene and Epidemiology” of the Federal Medical Biological Agency, Central laboratory of microbiological and clinical diagnostic tests		Federal State Budgetary Institution “Centre for Strategic Planning and Management of Biomedical Health Risks” of the Federal Medical Biological Agency, Laboratory for advanced molecular diagnostics of human diseases.	119121, Moscow, Russia, Pogodinskaya str. 10	LQ-21327_S108/2022
123333	csp_omicron.fasta	hCoV-19/Russia/MOW-CSP-LQ-21330_S109/2022	betacoronavirus	Original	2022-01-16	Europe/Russia/Moscow/Moscow	Human	unknown	unknown	unknown	Illumina NextSeq	bwa mapping + consensus		Chief Federal State Budgetary Healthcare Institution “Centre of Hygiene and Epidemiology” of the Federal Medical Biological Agency, Central laboratory of microbiological and clinical diagnostic tests		Federal State Budgetary Institution “Centre for Strategic Planning and Management of Biomedical Health Risks” of the Federal Medical Biological Agency, Laboratory for advanced molecular diagnostics of human diseases.	119121, Moscow, Russia, Pogodinskaya str. 10	LQ-21330_S109/2022
123333	csp_omicron.fasta	hCoV-19/Russia/MOW-CSP-LQ-21333_S110/2022	betacoronavirus	Original	2022-01-16	Europe/Russia/Moscow/Moscow	Human	unknown	unknown	unknown	Illumina NextSeq	bwa mapping + consensus		Chief Federal State Budgetary Healthcare Institution “Centre of Hygiene and Epidemiology” of the Federal Medical Biological Agency, Central laboratory of microbiological and clinical diagnostic tests		Federal State Budgetary Institution “Centre for Strategic Planning and Management of Biomedical Health Risks” of the Federal Medical Biological Agency, Laboratory for advanced molecular diagnostics of human diseases.	119121, Moscow, Russia, Pogodinskaya str. 10	LQ-21333_S110/2022
123333	csp_omicron.fasta	hCoV-19/Russia/MOW-CSP-LQ-21334_S111/2022	betacoronavirus	Original	2022-01-16	Europe/Russia/Moscow/Moscow	Human	unknown	unknown	unknown	Illumina NextSeq	bwa mapping + consensus		Chief Federal State Budgetary Healthcare Institution “Centre of Hygiene and Epidemiology” of the Federal Medical Biological Agency, Central laboratory of microbiological and clinical diagnostic tests		Federal State Budgetary Institution “Centre for Strategic Planning and Management of Biomedical Health Risks” of the Federal Medical Biological Agency, Laboratory for advanced molecular diagnostics of human diseases.	119121, Moscow, Russia, Pogodinskaya str. 10	LQ-21334_S111/2022
123333	csp_omicron.fasta	hCoV-19/Russia/MOW-CSP-LQ-21336_S112/2022	betacoronavirus	Original	2022-01-16	Europe/Russia/Moscow/Moscow	Human	unknown	unknown	unknown	Illumina NextSeq	bwa mapping + consensus		Chief Federal State Budgetary Healthcare Institution “Centre of Hygiene and Epidemiology” of the Federal Medical Biological Agency, Central laboratory of microbiological and clinical diagnostic tests		Federal State Budgetary Institution “Centre for Strategic Planning and Management of Biomedical Health Risks” of the Federal Medical Biological Agency, Laboratory for advanced molecular diagnostics of human diseases.	119121, Moscow, Russia, Pogodinskaya str. 10	LQ-21336_S112/2022
123333	csp_omicron.fasta	hCoV-19/Russia/MOW-CSP-LQ-21337_S113/2022	betacoronavirus	Original	2022-01-16	Europe/Russia/Moscow/Moscow	Human	unknown	unknown	unknown	Illumina NextSeq	bwa mapping + consensus		Chief Federal State Budgetary Healthcare Institution “Centre of Hygiene and Epidemiology” of the Federal Medical Biological Agency, Central laboratory of microbiological and clinical diagnostic tests		Federal State Budgetary Institution “Centre for Strategic Planning and Management of Biomedical Health Risks” of the Federal Medical Biological Agency, Laboratory for advanced molecular diagnostics of human diseases.	119121, Moscow, Russia, Pogodinskaya str. 10	LQ-21337_S113/2022
123333	csp_omicron.fasta	hCoV-19/Russia/MOW-CSP-LQ-21342_S114/2022	betacoronavirus	Original	2022-01-16	Europe/Russia/Moscow/Moscow	Human	unknown	unknown	unknown	Illumina NextSeq	bwa mapping + consensus		Chief Federal State Budgetary Healthcare Institution “Centre of Hygiene and Epidemiology” of the Federal Medical Biological Agency, Central laboratory of microbiological and clinical diagnostic tests		Federal State Budgetary Institution “Centre for Strategic Planning and Management of Biomedical Health Risks” of the Federal Medical Biological Agency, Laboratory for advanced molecular diagnostics of human diseases.	119121, Moscow, Russia, Pogodinskaya str. 10	LQ-21342_S114/2022
123333	csp_omicron.fasta	hCoV-19/Russia/MOW-CSP-LQ-21345_S115/2022	betacoronavirus	Original	2022-01-16	Europe/Russia/Moscow/Moscow	Human	unknown	unknown	unknown	Illumina NextSeq	bwa mapping + consensus		Chief Federal State Budgetary Healthcare Institution “Centre of Hygiene and Epidemiology” of the Federal Medical Biological Agency, Central laboratory of microbiological and clinical diagnostic tests		Federal State Budgetary Institution “Centre for Strategic Planning and Management of Biomedical Health Risks” of the Federal Medical Biological Agency, Laboratory for advanced molecular diagnostics of human diseases.	119121, Moscow, Russia, Pogodinskaya str. 10	LQ-21345_S115/2022
123333	csp_omicron.fasta	hCoV-19/Russia/MOW-CSP-LQ-21346_S175/2022	betacoronavirus	Original	2022-01-16	Europe/Russia/Moscow/Moscow	Human	unknown	unknown	unknown	Illumina NextSeq	bwa mapping + consensus		Chief Federal State Budgetary Healthcare Institution “Centre of Hygiene and Epidemiology” of the Federal Medical Biological Agency, Central laboratory of microbiological and clinical diagnostic tests		Federal State Budgetary Institution “Centre for Strategic Planning and Management of Biomedical Health Risks” of the Federal Medical Biological Agency, Laboratory for advanced molecular diagnostics of human diseases.	119121, Moscow, Russia, Pogodinskaya str. 10	LQ-21346_S175/2022
123333	csp_omicron.fasta	hCoV-19/Russia/MOW-CSP-LQ-21380_S116/2022	betacoronavirus	Original	2022-01-16	Europe/Russia/Moscow/Moscow	Human	unknown	unknown	unknown	Illumina NextSeq	bwa mapping + consensus		Chief Federal State Budgetary Healthcare Institution “Centre of Hygiene and Epidemiology” of the Federal Medical Biological Agency, Central laboratory of microbiological and clinical diagnostic tests		Federal State Budgetary Institution “Centre for Strategic Planning and Management of Biomedical Health Risks” of the Federal Medical Biological Agency, Laboratory for advanced molecular diagnostics of human diseases.	119121, Moscow, Russia, Pogodinskaya str. 10	LQ-21380_S116/2022
123333	csp_omicron.fasta	hCoV-19/Russia/MOW-CSP-LQ-21382_S117/2022	betacoronavirus	Original	2022-01-16	Europe/Russia/Moscow/Moscow	Human	unknown	unknown	unknown	Illumina NextSeq	bwa mapping + consensus		Chief Federal State Budgetary Healthcare Institution “Centre of Hygiene and Epidemiology” of the Federal Medical Biological Agency, Central laboratory of microbiological and clinical diagnostic tests		Federal State Budgetary Institution “Centre for Strategic Planning and Management of Biomedical Health Risks” of the Federal Medical Biological Agency, Laboratory for advanced molecular diagnostics of human diseases.	119121, Moscow, Russia, Pogodinskaya str. 10	LQ-21382_S117/2022
123333	csp_omicron.fasta	hCoV-19/Russia/MOW-CSP-LQ-21387_S118/2022	betacoronavirus	Original	2022-01-16	Europe/Russia/Moscow/Moscow	Human	unknown	unknown	unknown	Illumina NextSeq	bwa mapping + consensus		Chief Federal State Budgetary Healthcare Institution “Centre of Hygiene and Epidemiology” of the Federal Medical Biological Agency, Central laboratory of microbiological and clinical diagnostic tests		Federal State Budgetary Institution “Centre for Strategic Planning and Management of Biomedical Health Risks” of the Federal Medical Biological Agency, Laboratory for advanced molecular diagnostics of human diseases.	119121, Moscow, Russia, Pogodinskaya str. 10	LQ-21387_S118/2022
123333	csp_omicron.fasta	hCoV-19/Russia/MOW-CSP-LQ-21388_S119/2022	betacoronavirus	Original	2022-01-16	Europe/Russia/Moscow/Moscow	Human	unknown	unknown	unknown	Illumina NextSeq	bwa mapping + consensus		Chief Federal State Budgetary Healthcare Institution “Centre of Hygiene and Epidemiology” of the Federal Medical Biological Agency, Central laboratory of microbiological and clinical diagnostic tests		Federal State Budgetary Institution “Centre for Strategic Planning and Management of Biomedical Health Risks” of the Federal Medical Biological Agency, Laboratory for advanced molecular diagnostics of human diseases.	119121, Moscow, Russia, Pogodinskaya str. 10	LQ-21388_S119/2022
123333	csp_omicron.fasta	hCoV-19/Russia/MOW-CSP-LQ-21390_S120/2022	betacoronavirus	Original	2022-01-16	Europe/Russia/Moscow/Moscow	Human	unknown	unknown	unknown	Illumina NextSeq	bwa mapping + consensus		Chief Federal State Budgetary Healthcare Institution “Centre of Hygiene and Epidemiology” of the Federal Medical Biological Agency, Central laboratory of microbiological and clinical diagnostic tests		Federal State Budgetary Institution “Centre for Strategic Planning and Management of Biomedical Health Risks” of the Federal Medical Biological Agency, Laboratory for advanced molecular diagnostics of human diseases.	119121, Moscow, Russia, Pogodinskaya str. 10	LQ-21390_S120/2022
123333	csp_omicron.fasta	hCoV-19/Russia/MOW-CSP-LQ-21391_S121/2022	betacoronavirus	Original	2022-01-16	Europe/Russia/Moscow/Moscow	Human	unknown	unknown	unknown	Illumina NextSeq	bwa mapping + consensus		Chief Federal State Budgetary Healthcare Institution “Centre of Hygiene and Epidemiology” of the Federal Medical Biological Agency, Central laboratory of microbiological and clinical diagnostic tests		Federal State Budgetary Institution “Centre for Strategic Planning and Management of Biomedical Health Risks” of the Federal Medical Biological Agency, Laboratory for advanced molecular diagnostics of human diseases.	119121, Moscow, Russia, Pogodinskaya str. 10	LQ-21391_S121/2022
123333	csp_omicron.fasta	hCoV-19/Russia/MOW-CSP-LQ-21398_S122/2022	betacoronavirus	Original	2022-01-16	Europe/Russia/Moscow/Moscow	Human	unknown	unknown	unknown	Illumina NextSeq	bwa mapping + consensus		Chief Federal State Budgetary Healthcare Institution “Centre of Hygiene and Epidemiology” of the Federal Medical Biological Agency, Central laboratory of microbiological and clinical diagnostic tests		Federal State Budgetary Institution “Centre for Strategic Planning and Management of Biomedical Health Risks” of the Federal Medical Biological Agency, Laboratory for advanced molecular diagnostics of human diseases.	119121, Moscow, Russia, Pogodinskaya str. 10	LQ-21398_S122/2022
123333	csp_omicron.fasta	hCoV-19/Russia/MOW-CSP-LQ-21399_S123/2022	betacoronavirus	Original	2022-01-16	Europe/Russia/Moscow/Moscow	Human	unknown	unknown	unknown	Illumina NextSeq	bwa mapping + consensus		Chief Federal State Budgetary Healthcare Institution “Centre of Hygiene and Epidemiology” of the Federal Medical Biological Agency, Central laboratory of microbiological and clinical diagnostic tests		Federal State Budgetary Institution “Centre for Strategic Planning and Management of Biomedical Health Risks” of the Federal Medical Biological Agency, Laboratory for advanced molecular diagnostics of human diseases.	119121, Moscow, Russia, Pogodinskaya str. 10	LQ-21399_S123/2022
123333	csp_omicron.fasta	hCoV-19/Russia/MOW-CSP-LQ-21403_S124/2022	betacoronavirus	Original	2022-01-16	Europe/Russia/Moscow/Moscow	Human	unknown	unknown	unknown	Illumina NextSeq	bwa mapping + consensus		Chief Federal State Budgetary Healthcare Institution “Centre of Hygiene and Epidemiology” of the Federal Medical Biological Agency, Central laboratory of microbiological and clinical diagnostic tests		Federal State Budgetary Institution “Centre for Strategic Planning and Management of Biomedical Health Risks” of the Federal Medical Biological Agency, Laboratory for advanced molecular diagnostics of human diseases.	119121, Moscow, Russia, Pogodinskaya str. 10	LQ-21403_S124/2022
123333	csp_omicron.fasta	hCoV-19/Russia/MOW-CSP-LQ-21408_S125/2022	betacoronavirus	Original	2022-01-16	Europe/Russia/Moscow/Moscow	Human	unknown	unknown	unknown	Illumina NextSeq	bwa mapping + consensus		Chief Federal State Budgetary Healthcare Institution “Centre of Hygiene and Epidemiology” of the Federal Medical Biological Agency, Central laboratory of microbiological and clinical diagnostic tests		Federal State Budgetary Institution “Centre for Strategic Planning and Management of Biomedical Health Risks” of the Federal Medical Biological Agency, Laboratory for advanced molecular diagnostics of human diseases.	119121, Moscow, Russia, Pogodinskaya str. 10	LQ-21408_S125/2022
123333	csp_omicron.fasta	hCoV-19/Russia/MOW-CSP-LQ-21409_S126/2022	betacoronavirus	Original	2022-01-16	Europe/Russia/Moscow/Moscow	Human	unknown	unknown	unknown	Illumina NextSeq	bwa mapping + consensus		Chief Federal State Budgetary Healthcare Institution “Centre of Hygiene and Epidemiology” of the Federal Medical Biological Agency, Central laboratory of microbiological and clinical diagnostic tests		Federal State Budgetary Institution “Centre for Strategic Planning and Management of Biomedical Health Risks” of the Federal Medical Biological Agency, Laboratory for advanced molecular diagnostics of human diseases.	119121, Moscow, Russia, Pogodinskaya str. 10	LQ-21409_S126/2022
123333	csp_omicron.fasta	hCoV-19/Russia/MOW-CSP-LQ-21414_S127/2022	betacoronavirus	Original	2022-01-16	Europe/Russia/Moscow/Moscow	Human	unknown	unknown	unknown	Illumina NextSeq	bwa mapping + consensus		Chief Federal State Budgetary Healthcare Institution “Centre of Hygiene and Epidemiology” of the Federal Medical Biological Agency, Central laboratory of microbiological and clinical diagnostic tests		Federal State Budgetary Institution “Centre for Strategic Planning and Management of Biomedical Health Risks” of the Federal Medical Biological Agency, Laboratory for advanced molecular diagnostics of human diseases.	119121, Moscow, Russia, Pogodinskaya str. 10	LQ-21414_S127/2022
123333	csp_omicron.fasta	hCoV-19/Russia/MOW-CSP-LQ-21417_S128/2022	betacoronavirus	Original	2022-01-16	Europe/Russia/Moscow/Moscow	Human	unknown	unknown	unknown	Illumina NextSeq	bwa mapping + consensus		Chief Federal State Budgetary Healthcare Institution “Centre of Hygiene and Epidemiology” of the Federal Medical Biological Agency, Central laboratory of microbiological and clinical diagnostic tests		Federal State Budgetary Institution “Centre for Strategic Planning and Management of Biomedical Health Risks” of the Federal Medical Biological Agency, Laboratory for advanced molecular diagnostics of human diseases.	119121, Moscow, Russia, Pogodinskaya str. 10	LQ-21417_S128/2022
123333	csp_omicron.fasta	hCoV-19/Russia/MOW-CSP-LQ-21419_S129/2022	betacoronavirus	Original	2022-01-16	Europe/Russia/Moscow/Moscow	Human	unknown	unknown	unknown	Illumina NextSeq	bwa mapping + consensus		Chief Federal State Budgetary Healthcare Institution “Centre of Hygiene and Epidemiology” of the Federal Medical Biological Agency, Central laboratory of microbiological and clinical diagnostic tests		Federal State Budgetary Institution “Centre for Strategic Planning and Management of Biomedical Health Risks” of the Federal Medical Biological Agency, Laboratory for advanced molecular diagnostics of human diseases.	119121, Moscow, Russia, Pogodinskaya str. 10	LQ-21419_S129/2022
123333	csp_omicron.fasta	hCoV-19/Russia/MOW-CSP-LQ-21421_S130/2022	betacoronavirus	Original	2022-01-16	Europe/Russia/Moscow/Moscow	Human	unknown	unknown	unknown	Illumina NextSeq	bwa mapping + consensus		Chief Federal State Budgetary Healthcare Institution “Centre of Hygiene and Epidemiology” of the Federal Medical Biological Agency, Central laboratory of microbiological and clinical diagnostic tests		Federal State Budgetary Institution “Centre for Strategic Planning and Management of Biomedical Health Risks” of the Federal Medical Biological Agency, Laboratory for advanced molecular diagnostics of human diseases.	119121, Moscow, Russia, Pogodinskaya str. 10	LQ-21421_S130/2022
123333	csp_omicron.fasta	hCoV-19/Russia/MOW-CSP-LQ-21424_S178/2022	betacoronavirus	Original	2022-01-16	Europe/Russia/Moscow/Moscow	Human	unknown	unknown	unknown	Illumina NextSeq	bwa mapping + consensus		Chief Federal State Budgetary Healthcare Institution “Centre of Hygiene and Epidemiology” of the Federal Medical Biological Agency, Central laboratory of microbiological and clinical diagnostic tests		Federal State Budgetary Institution “Centre for Strategic Planning and Management of Biomedical Health Risks” of the Federal Medical Biological Agency, Laboratory for advanced molecular diagnostics of human diseases.	119121, Moscow, Russia, Pogodinskaya str. 10	LQ-21424_S178/2022
123333	csp_omicron.fasta	hCoV-19/Russia/MOW-CSP-LQ-21426_S131/2022	betacoronavirus	Original	2022-01-16	Europe/Russia/Moscow/Moscow	Human	unknown	unknown	unknown	Illumina NextSeq	bwa mapping + consensus		Chief Federal State Budgetary Healthcare Institution “Centre of Hygiene and Epidemiology” of the Federal Medical Biological Agency, Central laboratory of microbiological and clinical diagnostic tests		Federal State Budgetary Institution “Centre for Strategic Planning and Management of Biomedical Health Risks” of the Federal Medical Biological Agency, Laboratory for advanced molecular diagnostics of human diseases.	119121, Moscow, Russia, Pogodinskaya str. 10	LQ-21426_S131/2022
123333	csp_omicron.fasta	hCoV-19/Russia/MOW-CSP-LQ-21429_S132/2022	betacoronavirus	Original	2022-01-16	Europe/Russia/Moscow/Moscow	Human	unknown	unknown	unknown	Illumina NextSeq	bwa mapping + consensus		Chief Federal State Budgetary Healthcare Institution “Centre of Hygiene and Epidemiology” of the Federal Medical Biological Agency, Central laboratory of microbiological and clinical diagnostic tests		Federal State Budgetary Institution “Centre for Strategic Planning and Management of Biomedical Health Risks” of the Federal Medical Biological Agency, Laboratory for advanced molecular diagnostics of human diseases.	119121, Moscow, Russia, Pogodinskaya str. 10	LQ-21429_S132/2022
123333	csp_omicron.fasta	hCoV-19/Russia/MOW-CSP-LQ-21433_S133/2022	betacoronavirus	Original	2022-01-16	Europe/Russia/Moscow/Moscow	Human	unknown	unknown	unknown	Illumina NextSeq	bwa mapping + consensus		Chief Federal State Budgetary Healthcare Institution “Centre of Hygiene and Epidemiology” of the Federal Medical Biological Agency, Central laboratory of microbiological and clinical diagnostic tests		Federal State Budgetary Institution “Centre for Strategic Planning and Management of Biomedical Health Risks” of the Federal Medical Biological Agency, Laboratory for advanced molecular diagnostics of human diseases.	119121, Moscow, Russia, Pogodinskaya str. 10	LQ-21433_S133/2022
123333	csp_omicron.fasta	hCoV-19/Russia/MOW-CSP-LQ-21436_S134/2022	betacoronavirus	Original	2022-01-16	Europe/Russia/Moscow/Moscow	Human	unknown	unknown	unknown	Illumina NextSeq	bwa mapping + consensus		Chief Federal State Budgetary Healthcare Institution “Centre of Hygiene and Epidemiology” of the Federal Medical Biological Agency, Central laboratory of microbiological and clinical diagnostic tests		Federal State Budgetary Institution “Centre for Strategic Planning and Management of Biomedical Health Risks” of the Federal Medical Biological Agency, Laboratory for advanced molecular diagnostics of human diseases.	119121, Moscow, Russia, Pogodinskaya str. 10	LQ-21436_S134/2022
123333	csp_omicron.fasta	hCoV-19/Russia/MOW-CSP-LQ-21443_S135/2022	betacoronavirus	Original	2022-01-16	Europe/Russia/Moscow/Moscow	Human	unknown	unknown	unknown	Illumina NextSeq	bwa mapping + consensus		Chief Federal State Budgetary Healthcare Institution “Centre of Hygiene and Epidemiology” of the Federal Medical Biological Agency, Central laboratory of microbiological and clinical diagnostic tests		Federal State Budgetary Institution “Centre for Strategic Planning and Management of Biomedical Health Risks” of the Federal Medical Biological Agency, Laboratory for advanced molecular diagnostics of human diseases.	119121, Moscow, Russia, Pogodinskaya str. 10	LQ-21443_S135/2022
123333	csp_omicron.fasta	hCoV-19/Russia/MOW-CSP-LQ-21444_S136/2022	betacoronavirus	Original	2022-01-16	Europe/Russia/Moscow/Moscow	Human	unknown	unknown	unknown	Illumina NextSeq	bwa mapping + consensus		Chief Federal State Budgetary Healthcare Institution “Centre of Hygiene and Epidemiology” of the Federal Medical Biological Agency, Central laboratory of microbiological and clinical diagnostic tests		Federal State Budgetary Institution “Centre for Strategic Planning and Management of Biomedical Health Risks” of the Federal Medical Biological Agency, Laboratory for advanced molecular diagnostics of human diseases.	119121, Moscow, Russia, Pogodinskaya str. 10	LQ-21444_S136/2022
123333	csp_omicron.fasta	hCoV-19/Russia/MOW-CSP-LQ-21450_S137/2022	betacoronavirus	Original	2022-01-16	Europe/Russia/Moscow/Moscow	Human	unknown	unknown	unknown	Illumina NextSeq	bwa mapping + consensus		Chief Federal State Budgetary Healthcare Institution “Centre of Hygiene and Epidemiology” of the Federal Medical Biological Agency, Central laboratory of microbiological and clinical diagnostic tests		Federal State Budgetary Institution “Centre for Strategic Planning and Management of Biomedical Health Risks” of the Federal Medical Biological Agency, Laboratory for advanced molecular diagnostics of human diseases.	119121, Moscow, Russia, Pogodinskaya str. 10	LQ-21450_S137/2022
123333	csp_omicron.fasta	hCoV-19/Russia/MOW-CSP-LQ-21453_S138/2022	betacoronavirus	Original	2022-01-16	Europe/Russia/Moscow/Moscow	Human	unknown	unknown	unknown	Illumina NextSeq	bwa mapping + consensus		Chief Federal State Budgetary Healthcare Institution “Centre of Hygiene and Epidemiology” of the Federal Medical Biological Agency, Central laboratory of microbiological and clinical diagnostic tests		Federal State Budgetary Institution “Centre for Strategic Planning and Management of Biomedical Health Risks” of the Federal Medical Biological Agency, Laboratory for advanced molecular diagnostics of human diseases.	119121, Moscow, Russia, Pogodinskaya str. 10	LQ-21453_S138/2022
123333	csp_omicron.fasta	hCoV-19/Russia/MOW-CSP-LQ-21456_S139/2022	betacoronavirus	Original	2022-01-16	Europe/Russia/Moscow/Moscow	Human	unknown	unknown	unknown	Illumina NextSeq	bwa mapping + consensus		Chief Federal State Budgetary Healthcare Institution “Centre of Hygiene and Epidemiology” of the Federal Medical Biological Agency, Central laboratory of microbiological and clinical diagnostic tests		Federal State Budgetary Institution “Centre for Strategic Planning and Management of Biomedical Health Risks” of the Federal Medical Biological Agency, Laboratory for advanced molecular diagnostics of human diseases.	119121, Moscow, Russia, Pogodinskaya str. 10	LQ-21456_S139/2022
123333	csp_omicron.fasta	hCoV-19/Russia/MOW-CSP-LQ-21459_S140/2022	betacoronavirus	Original	2022-01-16	Europe/Russia/Moscow/Moscow	Human	unknown	unknown	unknown	Illumina NextSeq	bwa mapping + consensus		Chief Federal State Budgetary Healthcare Institution “Centre of Hygiene and Epidemiology” of the Federal Medical Biological Agency, Central laboratory of microbiological and clinical diagnostic tests		Federal State Budgetary Institution “Centre for Strategic Planning and Management of Biomedical Health Risks” of the Federal Medical Biological Agency, Laboratory for advanced molecular diagnostics of human diseases.	119121, Moscow, Russia, Pogodinskaya str. 10	LQ-21459_S140/2022
123333	csp_omicron.fasta	hCoV-19/Russia/MOW-CSP-LQ-21460_S141/2022	betacoronavirus	Original	2022-01-16	Europe/Russia/Moscow/Moscow	Human	unknown	unknown	unknown	Illumina NextSeq	bwa mapping + consensus		Chief Federal State Budgetary Healthcare Institution “Centre of Hygiene and Epidemiology” of the Federal Medical Biological Agency, Central laboratory of microbiological and clinical diagnostic tests		Federal State Budgetary Institution “Centre for Strategic Planning and Management of Biomedical Health Risks” of the Federal Medical Biological Agency, Laboratory for advanced molecular diagnostics of human diseases.	119121, Moscow, Russia, Pogodinskaya str. 10	LQ-21460_S141/2022
123333	csp_omicron.fasta	hCoV-19/Russia/MOW-CSP-LQ-21465_S142/2022	betacoronavirus	Original	2022-01-16	Europe/Russia/Moscow/Moscow	Human	unknown	unknown	unknown	Illumina NextSeq	bwa mapping + consensus		Chief Federal State Budgetary Healthcare Institution “Centre of Hygiene and Epidemiology” of the Federal Medical Biological Agency, Central laboratory of microbiological and clinical diagnostic tests		Federal State Budgetary Institution “Centre for Strategic Planning and Management of Biomedical Health Risks” of the Federal Medical Biological Agency, Laboratory for advanced molecular diagnostics of human diseases.	119121, Moscow, Russia, Pogodinskaya str. 10	LQ-21465_S142/2022
123333	csp_omicron.fasta	hCoV-19/Russia/MOW-CSP-LQ-21467_S143/2022	betacoronavirus	Original	2022-01-16	Europe/Russia/Moscow/Moscow	Human	unknown	unknown	unknown	Illumina NextSeq	bwa mapping + consensus		Chief Federal State Budgetary Healthcare Institution “Centre of Hygiene and Epidemiology” of the Federal Medical Biological Agency, Central laboratory of microbiological and clinical diagnostic tests		Federal State Budgetary Institution “Centre for Strategic Planning and Management of Biomedical Health Risks” of the Federal Medical Biological Agency, Laboratory for advanced molecular diagnostics of human diseases.	119121, Moscow, Russia, Pogodinskaya str. 10	LQ-21467_S143/2022
123333	csp_omicron.fasta	hCoV-19/Russia/MOW-CSP-LQ-21469_S144/2022	betacoronavirus	Original	2022-01-16	Europe/Russia/Moscow/Moscow	Human	unknown	unknown	unknown	Illumina NextSeq	bwa mapping + consensus		Chief Federal State Budgetary Healthcare Institution “Centre of Hygiene and Epidemiology” of the Federal Medical Biological Agency, Central laboratory of microbiological and clinical diagnostic tests		Federal State Budgetary Institution “Centre for Strategic Planning and Management of Biomedical Health Risks” of the Federal Medical Biological Agency, Laboratory for advanced molecular diagnostics of human diseases.	119121, Moscow, Russia, Pogodinskaya str. 10	LQ-21469_S144/2022
123333	csp_omicron.fasta	hCoV-19/Russia/MOW-CSP-LQ-21482_S145/2022	betacoronavirus	Original	2022-01-16	Europe/Russia/Moscow/Moscow	Human	unknown	unknown	unknown	Illumina NextSeq	bwa mapping + consensus		Chief Federal State Budgetary Healthcare Institution “Centre of Hygiene and Epidemiology” of the Federal Medical Biological Agency, Central laboratory of microbiological and clinical diagnostic tests		Federal State Budgetary Institution “Centre for Strategic Planning and Management of Biomedical Health Risks” of the Federal Medical Biological Agency, Laboratory for advanced molecular diagnostics of human diseases.	119121, Moscow, Russia, Pogodinskaya str. 10	LQ-21482_S145/2022
123333	csp_omicron.fasta	hCoV-19/Russia/MOW-CSP-LQ-21484_S146/2022	betacoronavirus	Original	2022-01-16	Europe/Russia/Moscow/Moscow	Human	unknown	unknown	unknown	Illumina NextSeq	bwa mapping + consensus		Chief Federal State Budgetary Healthcare Institution “Centre of Hygiene and Epidemiology” of the Federal Medical Biological Agency, Central laboratory of microbiological and clinical diagnostic tests		Federal State Budgetary Institution “Centre for Strategic Planning and Management of Biomedical Health Risks” of the Federal Medical Biological Agency, Laboratory for advanced molecular diagnostics of human diseases.	119121, Moscow, Russia, Pogodinskaya str. 10	LQ-21484_S146/2022
123333	csp_omicron.fasta	hCoV-19/Russia/MOW-CSP-LQ-21485_S147/2022	betacoronavirus	Original	2022-01-16	Europe/Russia/Moscow/Moscow	Human	unknown	unknown	unknown	Illumina NextSeq	bwa mapping + consensus		Chief Federal State Budgetary Healthcare Institution “Centre of Hygiene and Epidemiology” of the Federal Medical Biological Agency, Central laboratory of microbiological and clinical diagnostic tests		Federal State Budgetary Institution “Centre for Strategic Planning and Management of Biomedical Health Risks” of the Federal Medical Biological Agency, Laboratory for advanced molecular diagnostics of human diseases.	119121, Moscow, Russia, Pogodinskaya str. 10	LQ-21485_S147/2022
123333	csp_omicron.fasta	hCoV-19/Russia/MOW-CSP-LQ-21487_S148/2022	betacoronavirus	Original	2022-01-16	Europe/Russia/Moscow/Moscow	Human	unknown	unknown	unknown	Illumina NextSeq	bwa mapping + consensus		Chief Federal State Budgetary Healthcare Institution “Centre of Hygiene and Epidemiology” of the Federal Medical Biological Agency, Central laboratory of microbiological and clinical diagnostic tests		Federal State Budgetary Institution “Centre for Strategic Planning and Management of Biomedical Health Risks” of the Federal Medical Biological Agency, Laboratory for advanced molecular diagnostics of human diseases.	119121, Moscow, Russia, Pogodinskaya str. 10	LQ-21487_S148/2022
123333	csp_omicron.fasta	hCoV-19/Russia/MOW-CSP-LQ-21489_S180/2022	betacoronavirus	Original	2022-01-16	Europe/Russia/Moscow/Moscow	Human	unknown	unknown	unknown	Illumina NextSeq	bwa mapping + consensus		Chief Federal State Budgetary Healthcare Institution “Centre of Hygiene and Epidemiology” of the Federal Medical Biological Agency, Central laboratory of microbiological and clinical diagnostic tests		Federal State Budgetary Institution “Centre for Strategic Planning and Management of Biomedical Health Risks” of the Federal Medical Biological Agency, Laboratory for advanced molecular diagnostics of human diseases.	119121, Moscow, Russia, Pogodinskaya str. 10	LQ-21489_S180/2022
123333	csp_omicron.fasta	hCoV-19/Russia/MOW-CSP-LQ-21496_S149/2022	betacoronavirus	Original	2022-01-16	Europe/Russia/Moscow/Moscow	Human	unknown	unknown	unknown	Illumina NextSeq	bwa mapping + consensus		Chief Federal State Budgetary Healthcare Institution “Centre of Hygiene and Epidemiology” of the Federal Medical Biological Agency, Central laboratory of microbiological and clinical diagnostic tests		Federal State Budgetary Institution “Centre for Strategic Planning and Management of Biomedical Health Risks” of the Federal Medical Biological Agency, Laboratory for advanced molecular diagnostics of human diseases.	119121, Moscow, Russia, Pogodinskaya str. 10	LQ-21496_S149/2022
123333	csp_omicron.fasta	hCoV-19/Russia/MOW-CSP-LQ-21498_S150/2022	betacoronavirus	Original	2022-01-16	Europe/Russia/Moscow/Moscow	Human	unknown	unknown	unknown	Illumina NextSeq	bwa mapping + consensus		Chief Federal State Budgetary Healthcare Institution “Centre of Hygiene and Epidemiology” of the Federal Medical Biological Agency, Central laboratory of microbiological and clinical diagnostic tests		Federal State Budgetary Institution “Centre for Strategic Planning and Management of Biomedical Health Risks” of the Federal Medical Biological Agency, Laboratory for advanced molecular diagnostics of human diseases.	119121, Moscow, Russia, Pogodinskaya str. 10	LQ-21498_S150/2022
123333	csp_omicron.fasta	hCoV-19/Russia/MOW-CSP-LQ-21508_S151/2022	betacoronavirus	Original	2022-01-16	Europe/Russia/Moscow/Moscow	Human	unknown	unknown	unknown	Illumina NextSeq	bwa mapping + consensus		Chief Federal State Budgetary Healthcare Institution “Centre of Hygiene and Epidemiology” of the Federal Medical Biological Agency, Central laboratory of microbiological and clinical diagnostic tests		Federal State Budgetary Institution “Centre for Strategic Planning and Management of Biomedical Health Risks” of the Federal Medical Biological Agency, Laboratory for advanced molecular diagnostics of human diseases.	119121, Moscow, Russia, Pogodinskaya str. 10	LQ-21508_S151/2022
123333	csp_omicron.fasta	hCoV-19/Russia/MOW-CSP-LQ-21518_S152/2022	betacoronavirus	Original	2022-01-16	Europe/Russia/Moscow/Moscow	Human	unknown	unknown	unknown	Illumina NextSeq	bwa mapping + consensus		Chief Federal State Budgetary Healthcare Institution “Centre of Hygiene and Epidemiology” of the Federal Medical Biological Agency, Central laboratory of microbiological and clinical diagnostic tests		Federal State Budgetary Institution “Centre for Strategic Planning and Management of Biomedical Health Risks” of the Federal Medical Biological Agency, Laboratory for advanced molecular diagnostics of human diseases.	119121, Moscow, Russia, Pogodinskaya str. 10	LQ-21518_S152/2022
123333	csp_omicron.fasta	hCoV-19/Russia/MOW-CSP-LQ-NikolayD_S90/2022	betacoronavirus	Original	2022-01-17	Europe/Russia/Moscow/Moscow	Human	unknown	unknown	unknown	Illumina NextSeq	bwa mapping + consensus		Chief Federal State Budgetary Healthcare Institution “Centre of Hygiene and Epidemiology” of the Federal Medical Biological Agency, Central laboratory of microbiological and clinical diagnostic tests		Federal State Budgetary Institution “Centre for Strategic Planning and Management of Biomedical Health Risks” of the Federal Medical Biological Agency, Laboratory for advanced molecular diagnostics of human diseases.	119121, Moscow, Russia, Pogodinskaya str. 10	LQ-NikolayD_S90/2022
123333	csp_omicron.fasta	hCoV-19/Russia/MOW-CSP-LQ-Vladimir1_S89/2022	betacoronavirus	Original	2022-01-13	Europe/Russia/Moscow/Moscow	Human	unknown	unknown	unknown	Illumina NextSeq	bwa mapping + consensus		Chief Federal State Budgetary Healthcare Institution “Centre of Hygiene and Epidemiology” of the Federal Medical Biological Agency, Central laboratory of microbiological and clinical diagnostic tests		Federal State Budgetary Institution “Centre for Strategic Planning and Management of Biomedical Health Risks” of the Federal Medical Biological Agency, Laboratory for advanced molecular diagnostics of human diseases.	119121, Moscow, Russia, Pogodinskaya str. 10	LQ-Vladimir1_S89/2022
123333	csp_omicron.fasta	hCoV-19/Russia/MOW-CSP-RGD-166_S153/2022	betacoronavirus	Original	2022-01-13	Europe/Russia/Moscow/Moscow	Human	unknown	unknown	unknown	Illumina NextSeq	bwa mapping + consensus		Chief Federal State Budgetary Healthcare Institution “Centre of Hygiene and Epidemiology” of the Federal Medical Biological Agency, Central laboratory of microbiological and clinical diagnostic tests		Federal State Budgetary Institution “Centre for Strategic Planning and Management of Biomedical Health Risks” of the Federal Medical Biological Agency, Laboratory for advanced molecular diagnostics of human diseases.	119121, Moscow, Russia, Pogodinskaya str. 10	RGD-166_S153/2022
123333	csp_omicron.fasta	hCoV-19/Russia/MOW-CSP-RGD-179_S156/2022	betacoronavirus	Original	2022-01-14	Europe/Russia/Moscow/Moscow	Human	unknown	unknown	unknown	Illumina NextSeq	bwa mapping + consensus		Chief Federal State Budgetary Healthcare Institution “Centre of Hygiene and Epidemiology” of the Federal Medical Biological Agency, Central laboratory of microbiological and clinical diagnostic tests		Federal State Budgetary Institution “Centre for Strategic Planning and Management of Biomedical Health Risks” of the Federal Medical Biological Agency, Laboratory for advanced molecular diagnostics of human diseases.	119121, Moscow, Russia, Pogodinskaya str. 10	RGD-179_S156/2022
123333	csp_omicron.fasta	hCoV-19/Russia/MOW-CSP-RGD-186_S158/2022	betacoronavirus	Original	2022-01-14	Europe/Russia/Moscow/Moscow	Human	unknown	unknown	unknown	Illumina NextSeq	bwa mapping + consensus		Chief Federal State Budgetary Healthcare Institution “Centre of Hygiene and Epidemiology” of the Federal Medical Biological Agency, Central laboratory of microbiological and clinical diagnostic tests		Federal State Budgetary Institution “Centre for Strategic Planning and Management of Biomedical Health Risks” of the Federal Medical Biological Agency, Laboratory for advanced molecular diagnostics of human diseases.	119121, Moscow, Russia, Pogodinskaya str. 10	RGD-186_S158/2022
123333	csp_omicron.fasta	hCoV-19/Russia/MOW-CSP-RGD-189_S160/2022	betacoronavirus	Original	2022-01-14	Europe/Russia/Moscow/Moscow	Human	unknown	unknown	unknown	Illumina NextSeq	bwa mapping + consensus		Chief Federal State Budgetary Healthcare Institution “Centre of Hygiene and Epidemiology” of the Federal Medical Biological Agency, Central laboratory of microbiological and clinical diagnostic tests		Federal State Budgetary Institution “Centre for Strategic Planning and Management of Biomedical Health Risks” of the Federal Medical Biological Agency, Laboratory for advanced molecular diagnostics of human diseases.	119121, Moscow, Russia, Pogodinskaya str. 10	RGD-189_S160/2022
123333	csp_omicron.fasta	hCoV-19/Russia/MOW-CSP-RGD-196_S162/2022	betacoronavirus	Original	2022-01-14	Europe/Russia/Moscow/Moscow	Human	unknown	unknown	unknown	Illumina NextSeq	bwa mapping + consensus		Chief Federal State Budgetary Healthcare Institution “Centre of Hygiene and Epidemiology” of the Federal Medical Biological Agency, Central laboratory of microbiological and clinical diagnostic tests		Federal State Budgetary Institution “Centre for Strategic Planning and Management of Biomedical Health Risks” of the Federal Medical Biological Agency, Laboratory for advanced molecular diagnostics of human diseases.	119121, Moscow, Russia, Pogodinskaya str. 10	RGD-196_S162/2022
123333	csp_omicron.fasta	hCoV-19/Russia/MOW-CSP-RGD-212_S167/2022	betacoronavirus	Original	2022-01-17	Europe/Russia/Moscow/Moscow	Human	unknown	unknown	unknown	Illumina NextSeq	bwa mapping + consensus		Chief Federal State Budgetary Healthcare Institution “Centre of Hygiene and Epidemiology” of the Federal Medical Biological Agency, Central laboratory of microbiological and clinical diagnostic tests		Federal State Budgetary Institution “Centre for Strategic Planning and Management of Biomedical Health Risks” of the Federal Medical Biological Agency, Laboratory for advanced molecular diagnostics of human diseases.	119121, Moscow, Russia, Pogodinskaya str. 10	RGD-212_S167/2022
123333	csp_omicron.fasta	hCoV-19/Russia/MOW-CSP-RGD-214_S168/2022	betacoronavirus	Original	2022-01-17	Europe/Russia/Moscow/Moscow	Human	unknown	unknown	unknown	Illumina NextSeq	bwa mapping + consensus		Chief Federal State Budgetary Healthcare Institution “Centre of Hygiene and Epidemiology” of the Federal Medical Biological Agency, Central laboratory of microbiological and clinical diagnostic tests		Federal State Budgetary Institution “Centre for Strategic Planning and Management of Biomedical Health Risks” of the Federal Medical Biological Agency, Laboratory for advanced molecular diagnostics of human diseases.	119121, Moscow, Russia, Pogodinskaya str. 10	RGD-214_S168/2022
123333	csp_omicron.fasta	hCoV-19/Russia/MOW-CSP-RGD-232_S174/2022	betacoronavirus	Original	2022-01-17	Europe/Russia/Moscow/Moscow	Human	unknown	unknown	unknown	Illumina NextSeq	bwa mapping + consensus		Chief Federal State Budgetary Healthcare Institution “Centre of Hygiene and Epidemiology” of the Federal Medical Biological Agency, Central laboratory of microbiological and clinical diagnostic tests		Federal State Budgetary Institution “Centre for Strategic Planning and Management of Biomedical Health Risks” of the Federal Medical Biological Agency, Laboratory for advanced molecular diagnostics of human diseases.	119121, Moscow, Russia, Pogodinskaya str. 10	RGD-232_S174/2022
123333	csp_omicron.fasta	hCoV-19/Russia/MOW-CSP-RGD-253_S182/2022	betacoronavirus	Original	2022-01-17	Europe/Russia/Moscow/Moscow	Human	unknown	unknown	unknown	Illumina NextSeq	bwa mapping + consensus		Chief Federal State Budgetary Healthcare Institution “Centre of Hygiene and Epidemiology” of the Federal Medical Biological Agency, Central laboratory of microbiological and clinical diagnostic tests		Federal State Budgetary Institution “Centre for Strategic Planning and Management of Biomedical Health Risks” of the Federal Medical Biological Agency, Laboratory for advanced molecular diagnostics of human diseases.	119121, Moscow, Russia, Pogodinskaya str. 10	RGD-253_S182/2022
123333	csp_omicron.fasta	hCoV-19/Russia/MOW-CSP-LQ-20488_S1/2021	betacoronavirus	Original	2021-12-25	Europe/Russia/Moscow/Moscow	Human	unknown	unknown	unknown	Illumina NextSeq	bwa mapping + consensus		Chief Federal State Budgetary Healthcare Institution “Centre of Hygiene and Epidemiology” of the Federal Medical Biological Agency, Central laboratory of microbiological and clinical diagnostic tests		Federal State Budgetary Institution “Centre for Strategic Planning and Management of Biomedical Health Risks” of the Federal Medical Biological Agency, Laboratory for advanced molecular diagnostics of human diseases.	119121, Moscow, Russia, Pogodinskaya str. 10	LQ-20488_S1/2022
123333	csp_omicron.fasta	hCoV-19/Russia/MOW-CSP-LQ-20522_S2/2021	betacoronavirus	Original	2021-12-26	Europe/Russia/Moscow/Moscow	Human	unknown	unknown	unknown	Illumina NextSeq	bwa mapping + consensus		Chief Federal State Budgetary Healthcare Institution “Centre of Hygiene and Epidemiology” of the Federal Medical Biological Agency, Central laboratory of microbiological and clinical diagnostic tests		Federal State Budgetary Institution “Centre for Strategic Planning and Management of Biomedical Health Risks” of the Federal Medical Biological Agency, Laboratory for advanced molecular diagnostics of human diseases.	119121, Moscow, Russia, Pogodinskaya str. 10	LQ-20522_S2/2022
123333	csp_omicron.fasta	hCoV-19/Russia/MOW-CSP-LQ-20562_S3/2021	betacoronavirus	Original	2021-12-27	Europe/Russia/Moscow/Moscow	Human	unknown	unknown	unknown	Illumina NextSeq	bwa mapping + consensus		Chief Federal State Budgetary Healthcare Institution “Centre of Hygiene and Epidemiology” of the Federal Medical Biological Agency, Central laboratory of microbiological and clinical diagnostic tests		Federal State Budgetary Institution “Centre for Strategic Planning and Management of Biomedical Health Risks” of the Federal Medical Biological Agency, Laboratory for advanced molecular diagnostics of human diseases.	119121, Moscow, Russia, Pogodinskaya str. 10	LQ-20562_S3/2022
123333	csp_omicron.fasta	hCoV-19/Russia/MOW-CSP-LQ-20570_S4/2021	betacoronavirus	Original	2021-12-27	Europe/Russia/Moscow/Moscow	Human	unknown	unknown	unknown	Illumina NextSeq	bwa mapping + consensus		Chief Federal State Budgetary Healthcare Institution “Centre of Hygiene and Epidemiology” of the Federal Medical Biological Agency, Central laboratory of microbiological and clinical diagnostic tests		Federal State Budgetary Institution “Centre for Strategic Planning and Management of Biomedical Health Risks” of the Federal Medical Biological Agency, Laboratory for advanced molecular diagnostics of human diseases.	119121, Moscow, Russia, Pogodinskaya str. 10	LQ-20570_S4/2022
123333	csp_omicron.fasta	hCoV-19/Russia/MOW-CSP-LQ-20587_S5/2021	betacoronavirus	Original	2021-12-27	Europe/Russia/Moscow/Moscow	Human	unknown	unknown	unknown	Illumina NextSeq	bwa mapping + consensus		Chief Federal State Budgetary Healthcare Institution “Centre of Hygiene and Epidemiology” of the Federal Medical Biological Agency, Central laboratory of microbiological and clinical diagnostic tests		Federal State Budgetary Institution “Centre for Strategic Planning and Management of Biomedical Health Risks” of the Federal Medical Biological Agency, Laboratory for advanced molecular diagnostics of human diseases.	119121, Moscow, Russia, Pogodinskaya str. 10	LQ-20587_S5/2022
123333	csp_omicron.fasta	hCoV-19/Russia/MOW-CSP-LQ-20589_S6/2021	betacoronavirus	Original	2021-12-27	Europe/Russia/Moscow/Moscow	Human	unknown	unknown	unknown	Illumina NextSeq	bwa mapping + consensus		Chief Federal State Budgetary Healthcare Institution “Centre of Hygiene and Epidemiology” of the Federal Medical Biological Agency, Central laboratory of microbiological and clinical diagnostic tests		Federal State Budgetary Institution “Centre for Strategic Planning and Management of Biomedical Health Risks” of the Federal Medical Biological Agency, Laboratory for advanced molecular diagnostics of human diseases.	119121, Moscow, Russia, Pogodinskaya str. 10	LQ-20589_S6/2022
123333	csp_omicron.fasta	hCoV-19/Russia/MOW-CSP-LQ-20594_S7/2021	betacoronavirus	Original	2021-12-27	Europe/Russia/Moscow/Moscow	Human	unknown	unknown	unknown	Illumina NextSeq	bwa mapping + consensus		Chief Federal State Budgetary Healthcare Institution “Centre of Hygiene and Epidemiology” of the Federal Medical Biological Agency, Central laboratory of microbiological and clinical diagnostic tests		Federal State Budgetary Institution “Centre for Strategic Planning and Management of Biomedical Health Risks” of the Federal Medical Biological Agency, Laboratory for advanced molecular diagnostics of human diseases.	119121, Moscow, Russia, Pogodinskaya str. 10	LQ-20594_S7/2022
123333	csp_omicron.fasta	hCoV-19/Russia/MOW-CSP-LQ-20598_S8/2021	betacoronavirus	Original	2021-12-27	Europe/Russia/Moscow/Moscow	Human	unknown	unknown	unknown	Illumina NextSeq	bwa mapping + consensus		Chief Federal State Budgetary Healthcare Institution “Centre of Hygiene and Epidemiology” of the Federal Medical Biological Agency, Central laboratory of microbiological and clinical diagnostic tests		Federal State Budgetary Institution “Centre for Strategic Planning and Management of Biomedical Health Risks” of the Federal Medical Biological Agency, Laboratory for advanced molecular diagnostics of human diseases.	119121, Moscow, Russia, Pogodinskaya str. 10	LQ-20598_S8/2022
123333	csp_omicron.fasta	hCoV-19/Russia/MOW-CSP-LQ-20599_S9/2021	betacoronavirus	Original	2021-12-28	Europe/Russia/Moscow/Moscow	Human	unknown	unknown	unknown	Illumina NextSeq	bwa mapping + consensus		Chief Federal State Budgetary Healthcare Institution “Centre of Hygiene and Epidemiology” of the Federal Medical Biological Agency, Central laboratory of microbiological and clinical diagnostic tests		Federal State Budgetary Institution “Centre for Strategic Planning and Management of Biomedical Health Risks” of the Federal Medical Biological Agency, Laboratory for advanced molecular diagnostics of human diseases.	119121, Moscow, Russia, Pogodinskaya str. 10	LQ-20599_S9/2022
123333	csp_omicron.fasta	hCoV-19/Russia/MOW-CSP-LQ-20645_S10/2021	betacoronavirus	Original	2021-12-29	Europe/Russia/Moscow/Moscow	Human	unknown	unknown	unknown	Illumina NextSeq	bwa mapping + consensus		Chief Federal State Budgetary Healthcare Institution “Centre of Hygiene and Epidemiology” of the Federal Medical Biological Agency, Central laboratory of microbiological and clinical diagnostic tests		Federal State Budgetary Institution “Centre for Strategic Planning and Management of Biomedical Health Risks” of the Federal Medical Biological Agency, Laboratory for advanced molecular diagnostics of human diseases.	119121, Moscow, Russia, Pogodinskaya str. 10	LQ-20645_S10/2022
123333	csp_omicron.fasta	hCoV-19/Russia/MOW-CSP-LQ-20690_S11/2021	betacoronavirus	Original	2021-12-29	Europe/Russia/Moscow/Moscow	Human	unknown	unknown	unknown	Illumina NextSeq	bwa mapping + consensus		Chief Federal State Budgetary Healthcare Institution “Centre of Hygiene and Epidemiology” of the Federal Medical Biological Agency, Central laboratory of microbiological and clinical diagnostic tests		Federal State Budgetary Institution “Centre for Strategic Planning and Management of Biomedical Health Risks” of the Federal Medical Biological Agency, Laboratory for advanced molecular diagnostics of human diseases.	119121, Moscow, Russia, Pogodinskaya str. 10	LQ-20690_S11/2022
123333	csp_omicron.fasta	hCoV-19/Russia/MOW-CSP-LQ-20694_S12/2021	betacoronavirus	Original	2021-12-29	Europe/Russia/Moscow/Moscow	Human	unknown	unknown	unknown	Illumina NextSeq	bwa mapping + consensus		Chief Federal State Budgetary Healthcare Institution “Centre of Hygiene and Epidemiology” of the Federal Medical Biological Agency, Central laboratory of microbiological and clinical diagnostic tests		Federal State Budgetary Institution “Centre for Strategic Planning and Management of Biomedical Health Risks” of the Federal Medical Biological Agency, Laboratory for advanced molecular diagnostics of human diseases.	119121, Moscow, Russia, Pogodinskaya str. 10	LQ-20694_S12/2022
123333	csp_omicron.fasta	hCoV-19/Russia/MOW-CSP-LQ-20698_S13/2021	betacoronavirus	Original	2021-12-29	Europe/Russia/Moscow/Moscow	Human	unknown	unknown	unknown	Illumina NextSeq	bwa mapping + consensus		Chief Federal State Budgetary Healthcare Institution “Centre of Hygiene and Epidemiology” of the Federal Medical Biological Agency, Central laboratory of microbiological and clinical diagnostic tests		Federal State Budgetary Institution “Centre for Strategic Planning and Management of Biomedical Health Risks” of the Federal Medical Biological Agency, Laboratory for advanced molecular diagnostics of human diseases.	119121, Moscow, Russia, Pogodinskaya str. 10	LQ-20698_S13/2022
123333	csp_omicron.fasta	hCoV-19/Russia/MOW-CSP-LQ-20706_S14/2021	betacoronavirus	Original	2021-12-29	Europe/Russia/Moscow/Moscow	Human	unknown	unknown	unknown	Illumina NextSeq	bwa mapping + consensus		Chief Federal State Budgetary Healthcare Institution “Centre of Hygiene and Epidemiology” of the Federal Medical Biological Agency, Central laboratory of microbiological and clinical diagnostic tests		Federal State Budgetary Institution “Centre for Strategic Planning and Management of Biomedical Health Risks” of the Federal Medical Biological Agency, Laboratory for advanced molecular diagnostics of human diseases.	119121, Moscow, Russia, Pogodinskaya str. 10	LQ-20706_S14/2022
123333	csp_omicron.fasta	hCoV-19/Russia/MOW-CSP-LQ-20707_S15/2021	betacoronavirus	Original	2021-12-29	Europe/Russia/Moscow/Moscow	Human	unknown	unknown	unknown	Illumina NextSeq	bwa mapping + consensus		Chief Federal State Budgetary Healthcare Institution “Centre of Hygiene and Epidemiology” of the Federal Medical Biological Agency, Central laboratory of microbiological and clinical diagnostic tests		Federal State Budgetary Institution “Centre for Strategic Planning and Management of Biomedical Health Risks” of the Federal Medical Biological Agency, Laboratory for advanced molecular diagnostics of human diseases.	119121, Moscow, Russia, Pogodinskaya str. 10	LQ-20707_S15/2022
123333	csp_omicron.fasta	hCoV-19/Russia/MOW-CSP-LQ-20743_S16/2021	betacoronavirus	Original	2021-12-30	Europe/Russia/Moscow/Moscow	Human	unknown	unknown	unknown	Illumina NextSeq	bwa mapping + consensus		Chief Federal State Budgetary Healthcare Institution “Centre of Hygiene and Epidemiology” of the Federal Medical Biological Agency, Central laboratory of microbiological and clinical diagnostic tests		Federal State Budgetary Institution “Centre for Strategic Planning and Management of Biomedical Health Risks” of the Federal Medical Biological Agency, Laboratory for advanced molecular diagnostics of human diseases.	119121, Moscow, Russia, Pogodinskaya str. 10	LQ-20743_S16/2022
123333	csp_omicron.fasta	hCoV-19/Russia/MOW-CSP-LQ-20750_S17/2021	betacoronavirus	Original	2021-12-30	Europe/Russia/Moscow/Moscow	Human	unknown	unknown	unknown	Illumina NextSeq	bwa mapping + consensus		Chief Federal State Budgetary Healthcare Institution “Centre of Hygiene and Epidemiology” of the Federal Medical Biological Agency, Central laboratory of microbiological and clinical diagnostic tests		Federal State Budgetary Institution “Centre for Strategic Planning and Management of Biomedical Health Risks” of the Federal Medical Biological Agency, Laboratory for advanced molecular diagnostics of human diseases.	119121, Moscow, Russia, Pogodinskaya str. 10	LQ-20750_S17/2022
123333	csp_omicron.fasta	hCoV-19/Russia/MOW-CSP-LQ-20755_S18/2021	betacoronavirus	Original	2021-12-30	Europe/Russia/Moscow/Moscow	Human	unknown	unknown	unknown	Illumina NextSeq	bwa mapping + consensus		Chief Federal State Budgetary Healthcare Institution “Centre of Hygiene and Epidemiology” of the Federal Medical Biological Agency, Central laboratory of microbiological and clinical diagnostic tests		Federal State Budgetary Institution “Centre for Strategic Planning and Management of Biomedical Health Risks” of the Federal Medical Biological Agency, Laboratory for advanced molecular diagnostics of human diseases.	119121, Moscow, Russia, Pogodinskaya str. 10	LQ-20755_S18/2022
123333	csp_omicron.fasta	hCoV-19/Russia/MOW-CSP-LQ-20757_S19/2021	betacoronavirus	Original	2021-12-30	Europe/Russia/Moscow/Moscow	Human	unknown	unknown	unknown	Illumina NextSeq	bwa mapping + consensus		Chief Federal State Budgetary Healthcare Institution “Centre of Hygiene and Epidemiology” of the Federal Medical Biological Agency, Central laboratory of microbiological and clinical diagnostic tests		Federal State Budgetary Institution “Centre for Strategic Planning and Management of Biomedical Health Risks” of the Federal Medical Biological Agency, Laboratory for advanced molecular diagnostics of human diseases.	119121, Moscow, Russia, Pogodinskaya str. 10	LQ-20757_S19/2022
123333	csp_omicron.fasta	hCoV-19/Russia/MOW-CSP-LQ-20784_S20/2021	betacoronavirus	Original	2021-12-30	Europe/Russia/Moscow/Moscow	Human	unknown	unknown	unknown	Illumina NextSeq	bwa mapping + consensus		Chief Federal State Budgetary Healthcare Institution “Centre of Hygiene and Epidemiology” of the Federal Medical Biological Agency, Central laboratory of microbiological and clinical diagnostic tests		Federal State Budgetary Institution “Centre for Strategic Planning and Management of Biomedical Health Risks” of the Federal Medical Biological Agency, Laboratory for advanced molecular diagnostics of human diseases.	119121, Moscow, Russia, Pogodinskaya str. 10	LQ-20784_S20/2022
123333	csp_omicron.fasta	hCoV-19/Russia/MOW-CSP-LQ-20791_S21/2021	betacoronavirus	Original	2021-12-31	Europe/Russia/Moscow/Moscow	Human	unknown	unknown	unknown	Illumina NextSeq	bwa mapping + consensus		Chief Federal State Budgetary Healthcare Institution “Centre of Hygiene and Epidemiology” of the Federal Medical Biological Agency, Central laboratory of microbiological and clinical diagnostic tests		Federal State Budgetary Institution “Centre for Strategic Planning and Management of Biomedical Health Risks” of the Federal Medical Biological Agency, Laboratory for advanced molecular diagnostics of human diseases.	119121, Moscow, Russia, Pogodinskaya str. 10	LQ-20791_S21/2022
123333	csp_omicron.fasta	hCoV-19/Russia/MOW-CSP-LQ-20806_S22/2021	betacoronavirus	Original	2021-12-31	Europe/Russia/Moscow/Moscow	Human	unknown	unknown	unknown	Illumina NextSeq	bwa mapping + consensus		Chief Federal State Budgetary Healthcare Institution “Centre of Hygiene and Epidemiology” of the Federal Medical Biological Agency, Central laboratory of microbiological and clinical diagnostic tests		Federal State Budgetary Institution “Centre for Strategic Planning and Management of Biomedical Health Risks” of the Federal Medical Biological Agency, Laboratory for advanced molecular diagnostics of human diseases.	119121, Moscow, Russia, Pogodinskaya str. 10	LQ-20806_S22/2022
123333	csp_omicron.fasta	hCoV-19/Russia/MOW-CSP-LQ-20908_S23/2022	betacoronavirus	Original	2022-01-04	Europe/Russia/Moscow/Moscow	Human	unknown	unknown	unknown	Illumina NextSeq	bwa mapping + consensus		Chief Federal State Budgetary Healthcare Institution “Centre of Hygiene and Epidemiology” of the Federal Medical Biological Agency, Central laboratory of microbiological and clinical diagnostic tests		Federal State Budgetary Institution “Centre for Strategic Planning and Management of Biomedical Health Risks” of the Federal Medical Biological Agency, Laboratory for advanced molecular diagnostics of human diseases.	119121, Moscow, Russia, Pogodinskaya str. 10	LQ-20908_S23/2022
123333	csp_omicron.fasta	hCoV-19/Russia/MOW-CSP-LQ-20923_S24/2022	betacoronavirus	Original	2022-01-04	Europe/Russia/Moscow/Moscow	Human	unknown	unknown	unknown	Illumina NextSeq	bwa mapping + consensus		Chief Federal State Budgetary Healthcare Institution “Centre of Hygiene and Epidemiology” of the Federal Medical Biological Agency, Central laboratory of microbiological and clinical diagnostic tests		Federal State Budgetary Institution “Centre for Strategic Planning and Management of Biomedical Health Risks” of the Federal Medical Biological Agency, Laboratory for advanced molecular diagnostics of human diseases.	119121, Moscow, Russia, Pogodinskaya str. 10	LQ-20923_S24/2022
123333	csp_omicron.fasta	hCoV-19/Russia/MOW-CSP-LQ-20929_S25/2022	betacoronavirus	Original	2022-01-04	Europe/Russia/Moscow/Moscow	Human	unknown	unknown	unknown	Illumina NextSeq	bwa mapping + consensus		Chief Federal State Budgetary Healthcare Institution “Centre of Hygiene and Epidemiology” of the Federal Medical Biological Agency, Central laboratory of microbiological and clinical diagnostic tests		Federal State Budgetary Institution “Centre for Strategic Planning and Management of Biomedical Health Risks” of the Federal Medical Biological Agency, Laboratory for advanced molecular diagnostics of human diseases.	119121, Moscow, Russia, Pogodinskaya str. 10	LQ-20929_S25/2022
123333	csp_omicron.fasta	hCoV-19/Russia/MOW-CSP-LQ-20946_S26/2022	betacoronavirus	Original	2022-01-04	Europe/Russia/Moscow/Moscow	Human	unknown	unknown	unknown	Illumina NextSeq	bwa mapping + consensus		Chief Federal State Budgetary Healthcare Institution “Centre of Hygiene and Epidemiology” of the Federal Medical Biological Agency, Central laboratory of microbiological and clinical diagnostic tests		Federal State Budgetary Institution “Centre for Strategic Planning and Management of Biomedical Health Risks” of the Federal Medical Biological Agency, Laboratory for advanced molecular diagnostics of human diseases.	119121, Moscow, Russia, Pogodinskaya str. 10	LQ-20946_S26/2022
123333	csp_omicron.fasta	hCoV-19/Russia/MOW-CSP-LQ-20955_S27/2022	betacoronavirus	Original	2022-01-04	Europe/Russia/Moscow/Moscow	Human	unknown	unknown	unknown	Illumina NextSeq	bwa mapping + consensus		Chief Federal State Budgetary Healthcare Institution “Centre of Hygiene and Epidemiology” of the Federal Medical Biological Agency, Central laboratory of microbiological and clinical diagnostic tests		Federal State Budgetary Institution “Centre for Strategic Planning and Management of Biomedical Health Risks” of the Federal Medical Biological Agency, Laboratory for advanced molecular diagnostics of human diseases.	119121, Moscow, Russia, Pogodinskaya str. 10	LQ-20955_S27/2022
123333	csp_omicron.fasta	hCoV-19/Russia/MOW-CSP-LQ-20959_S28/2022	betacoronavirus	Original	2022-01-04	Europe/Russia/Moscow/Moscow	Human	unknown	unknown	unknown	Illumina NextSeq	bwa mapping + consensus		Chief Federal State Budgetary Healthcare Institution “Centre of Hygiene and Epidemiology” of the Federal Medical Biological Agency, Central laboratory of microbiological and clinical diagnostic tests		Federal State Budgetary Institution “Centre for Strategic Planning and Management of Biomedical Health Risks” of the Federal Medical Biological Agency, Laboratory for advanced molecular diagnostics of human diseases.	119121, Moscow, Russia, Pogodinskaya str. 10	LQ-20959_S28/2022
123333	csp_omicron.fasta	hCoV-19/Russia/MOW-CSP-LQ-20010_S21/2021	betacoronavirus	Original	2021-12-15	Europe/Russia/Moscow/Moscow	Human	unknown	unknown	unknown	Illumina NextSeq	bwa mapping + consensus		Chief Federal State Budgetary Healthcare Institution “Centre of Hygiene and Epidemiology” of the Federal Medical Biological Agency, Central laboratory of microbiological and clinical diagnostic tests		Federal State Budgetary Institution “Centre for Strategic Planning and Management of Biomedical Health Risks” of the Federal Medical Biological Agency, Laboratory for advanced molecular diagnostics of human diseases.	119121, Moscow, Russia, Pogodinskaya str. 10	LQ-20010_S21/2022
123333	csp_omicron.fasta	hCoV-19/Russia/MOW-CSP-LQ-20036_S30/2021	betacoronavirus	Original	2021-12-15	Europe/Russia/Moscow/Moscow	Human	unknown	unknown	unknown	Illumina NextSeq	bwa mapping + consensus		Chief Federal State Budgetary Healthcare Institution “Centre of Hygiene and Epidemiology” of the Federal Medical Biological Agency, Central laboratory of microbiological and clinical diagnostic tests		Federal State Budgetary Institution “Centre for Strategic Planning and Management of Biomedical Health Risks” of the Federal Medical Biological Agency, Laboratory for advanced molecular diagnostics of human diseases.	119121, Moscow, Russia, Pogodinskaya str. 10	LQ-20036_S30/2022
123333	csp_omicron.fasta	hCoV-19/Russia/MOW-CSP-Uganda_S175/2021	betacoronavirus	Original	2021-12-09	Europe/Russia/Moscow/Moscow	Human	unknown	unknown	unknown	Illumina NextSeq	bwa mapping + consensus		Chief Federal State Budgetary Healthcare Institution “Centre of Hygiene and Epidemiology” of the Federal Medical Biological Agency, Central laboratory of microbiological and clinical diagnostic tests		Federal State Budgetary Institution “Centre for Strategic Planning and Management of Biomedical Health Risks” of the Federal Medical Biological Agency, Laboratory for advanced molecular diagnostics of human diseases.	119121, Moscow, Russia, Pogodinskaya str. 10	Uganda_S175/2022
123333	csp_omicron.fasta	hCoV-19/Russia/MOW-CSP-VIS-2_S192/2021	betacoronavirus	Original	2021-12-14	Europe/Russia/Moscow/Moscow	Human	unknown	unknown	unknown	Illumina NextSeq	bwa mapping + consensus		Chief Federal State Budgetary Healthcare Institution “Centre of Hygiene and Epidemiology” of the Federal Medical Biological Agency, Central laboratory of microbiological and clinical diagnostic tests		Federal State Budgetary Institution “Centre for Strategic Planning and Management of Biomedical Health Risks” of the Federal Medical Biological Agency, Laboratory for advanced molecular diagnostics of human diseases.	119121, Moscow, Russia, Pogodinskaya str. 10	VIS-2_S192/2022
123333	csp_omicron.fasta	hCoV-19/Russia/MOW-CSP-VIS-5_S40/2021	betacoronavirus	Original	2021-12-16	Europe/Russia/Moscow/Moscow	Human	unknown	unknown	unknown	Illumina NextSeq	bwa mapping + consensus		Chief Federal State Budgetary Healthcare Institution “Centre of Hygiene and Epidemiology” of the Federal Medical Biological Agency, Central laboratory of microbiological and clinical diagnostic tests		Federal State Budgetary Institution “Centre for Strategic Planning and Management of Biomedical Health Risks” of the Federal Medical Biological Agency, Laboratory for advanced molecular diagnostics of human diseases.	119121, Moscow, Russia, Pogodinskaya str. 10	VIS-5_S40/2022
123333	csp_omicron.fasta	hCoV-19/Russia/MOW-CSP-VIS_S220/2021	betacoronavirus	Original	2021-12-09	Europe/Russia/Moscow/Moscow	Human	unknown	unknown	unknown	Illumina NextSeq	bwa mapping + consensus		Chief Federal State Budgetary Healthcare Institution “Centre of Hygiene and Epidemiology” of the Federal Medical Biological Agency, Central laboratory of microbiological and clinical diagnostic tests		Federal State Budgetary Institution “Centre for Strategic Planning and Management of Biomedical Health Risks” of the Federal Medical Biological Agency, Laboratory for advanced molecular diagnostics of human diseases.	119121, Moscow, Russia, Pogodinskaya str. 10	VIS_S220/2022
